# Supplementary material for: A single-cell atlas of spatial and temporal gene expression in the mouse cranial neural plate
Source: bioRxiv preprint, doi:10.1101/2024.08.25.609458, version 3 (2025-03-06)
Supplement: Table S2 [file 609458_file06.xlsx]

## Sheet: PhenoGraph cluster 0
gene	P-value (FDR adjusted)	MAST Hurdle	logFC
DNMT3B	0	1.40095	2.55521
MEG3	0	1.22893	1.24928
SFRP1	0	1.01727	1.27143
SOX2	0	0.953879	2.03654
LDHB	0	0.946228	1.23841
FGFR1	0	0.940784	1.33356
STMN2	0	0.82345	1.86369
EZR	0	0.804338	1.51227
PLS3	0	0.800479	1.77172
SNRPN	0	0.786409	1.31577
SALL4	0	0.738786	1.14318
ACER2	0	0.734997	2.06556
MYO10	0	0.733757	1.24984
LARP7	0	0.728381	1.2169
IQGAP1	0	0.713587	1.59189
UBE2K	0	0.71067	1.15166
KIF21A	0	0.70676	1.82849
JARID2	0	0.698434	1.20321
AES	0	0.687818	2.10941
LY6E	0	0.66497	1.56249
SMS	0	0.657372	0.941151
POU3F1	0	0.617626	2.74304
PCSK1N	0	0.617492	2.90319
OTX2	0	0.611049	2.30038
SOCS2	0	0.603684	2.0367
IFITM2	0	0.595372	0.777899
HMGN5	0	0.595217	0.956356
DDIT4	0	0.592522	1.62527
POU5F1	0	0.580662	3.07455
PSIP1	0	0.576034	0.821256
WFDC2	0	0.575419	2.03557
EPCAM	0	0.574678	2.55547
HELLS	0	0.573739	0.880649
SLC2A1	0	0.568418	0.882085
B230312C02RIK	0	0.563711	1.25233
RGMA	0	0.540422	1.30151
CDCA7	0	0.52487	0.776367
GREB1L	0	0.49377	0.93044
RBPMS2	0	0.48494	1.12981
TCF7L1	0	0.482535	1.02667
RASGRP2	0	0.469035	2.16249
ZIC2	0	0.451139	1.5952
DDAH1	0	0.44001	1.52249
CHCHD10	0	0.433625	2.67254
HDAC6	0	0.426504	1.35622
SPINT2	0	0.42459	1.27871
SOX3	0	0.424425	0.969402
TNRC6C	0	0.419571	0.719084
PTEN	0	0.418385	0.753172
PHC1	0	0.403983	1.27805
CKB	0	0.391802	2.06888
ZIC3	0	0.384619	2.03308
MRPL34	0	0.383847	0.65537
SHISA2	0	0.379264	1.7743
FAM60A	0	0.378346	0.612674
X1810022K09RIK	0	0.378334
NDUFA12	0	0.366342	0.624024
CRMP1	0	0.360971	1.17221
ANK2	0	0.360892	1.12563
MPHOSPH8	0	0.359666	0.631211
FGFR2	0	0.358707	1.56037
DUT	0	0.35598	0.526141
INA	0	0.354501	1.89143
GNAI2	0	0.351369	0.555246
TUBB3	0	0.350214	1.73362
SSSCA1	0	0.34607	0.602615
NFYB	0	0.338295	0.625206
LMO1	0	0.338232	2.72993
ATP5K	0	0.332883	0.553094
ERAS	0	0.33158	3.17088
ATP5L	0	0.32914	0.536265
ECI1	0	0.317797	1.50443
TOMM7	0	0.317438	0.492308
HS6ST1	0	0.313107	1.97325
COX6B2	0	0.310972	1.17742
NASP	0	0.308695	0.441001
ATP6V1F	0	0.308449	0.538041
UCP2	0	0.30539	1.21623
GNG3	0	0.302738	1.98588
COX7C	0	0.295528	0.444856
ZIC5	0	0.291603	1.74939
CGNL1	0	0.291271	1.78718
EIF1AX	0	0.286325	0.464817
NRXN2	0	0.278865	1.52445
PIM2	0	0.270366	4.00225
HSP90AA1	0	0.269714	0.375623
HIST3H2BA	0	0.260239	1.64195
TUBB4A	0	0.2489	1.62579
IRS4	0	0.244733	1.33649
STX3	0	0.24164	1.25307
CYP26A1	0	0.237249	2.52634
RPL31	0	0.235215	0.342593
PDZD4	0	0.234203	1.81303
RPS27	0	0.228542	0.33835
CLDN6	0	0.227393	1.38114
TMA7	0	0.223955	0.331051
NAP1L1	0	0.216787	0.310793
CDH1	0	0.215926	2.18719
MTAP7D3	0	0.21408	1.99164
QPRT	0	0.204468	1.55408
MAP1A	0	0.201222	1.63441
HESX1	0	0.197302	2.91407
PAX2	0	0.19677	1.92384
BTBD17	0	0.196621	2.0707
RSPO1	0	0.19147	1.35177
CLDN7	0	0.180734	0.796107
SLC1A3	0	0.177919	1.49838
LHX5	0	0.173627	2.48136
TMEM238	0	0.171851	1.72596
ZSCAN10	0	0.170976	2.18338
STMN3	0	0.168269	1.75057
GATSL2	0	0.167083	1.41204
KLF9	0	0.165456	1.62171
NPTX2	0	0.16356	2.4705
FAM57B	0	0.160243	2.45656
APOC1	0	0.156536	1.76456
RAB25	0	0.155766	1.94956
L1TD1	0	0.153479	2.97549
FZD5	0	0.152906	2.18046
HSPB1	0	0.139783	1.21132
FOXD4	0	0.132837	2.48497
SHB	0	0.131001	1.98127
CAMKV	0	0.115254	1.74649
AP1M2	0	0.112669	1.59292
GM9847	0	0.111395	2.05934
CALCA	0	0.110723	1.96902
CAPG	0	0.107482	1.75486
MAPK8IP2	0	0.104296	2.13139
JPH4	0	0.104205	2.99351
X1700013H16RIK	0	0.102133
A830018L16RIK	0	0.0994224	2.38751
LMX1B	0	0.0971165	2.08907
PIPOX	0	0.0927466	1.79071
SLC7A3	0	0.0918607	2.21855
FUOM	0	0.0875479	2.33046
MCF2	0	0.0829172	3.21905
NFASC	0	0.0730973	2.39266
FABP3	0	0.0727305	1.89549
VRTN	0	0.0722316	2.53334
PHOX2A	0	0.0708903	2.72438
X2900011O08RIK	0	0.0695262
GALNT12	0	0.0634171	2.10749
CALN1	0	0.0603872	2.25172
RUNDC3A	0	0.0581366	2.17158
ELAVL3	0	0.057603	2.88307
NDRG2	0	0.0504295	2.82231
GM42637	0	0.0487533	3.04415
UTF1	0	0.047703	2.80902
PCSK2	0	0.0410618	3.26847
NANOG	0	0.0316901	3.38781
FGF5	0	0.0311765	3.12843
JAKMIP1	0	0.0304464	2.57465
DTX1	0	0.0303687	2.69919
SEZ6	0	0.0296547	2.57052
RTN4RL1	0	0.0276262	2.5967
ZMAT4	0	0.0260788	2.70665
FXYD7	0	0.0253557	3.08754
CABP7	0	0.0237252	2.97466
PLATR10	0	0.0163617	3.46629
PHLDA2	0	-0.127104	-0.905555
TMEM167	0	-0.255182	-0.397083
OSTC	0	-0.266524	-0.441475
FKBP1A	0	-0.278518	-0.425142
ALYREF	0	-0.317371	-0.518348
RDX	0	-0.352098	-0.536503
NENF	0	-0.383157	-1.00335
GALNT1	0	-0.391947	-1.07279
ALAD	0	-0.408913	-0.989837
MAGED1	0	-0.415149	-0.858934
NDN	0	-0.425339	-0.912536
AKT1	0	-0.433225	-1.35779
CFL2	0	-0.435004	-1.03068
GRB10	0	-0.441567	-0.783031
TMED2	0	-0.44602	-0.796883
KDELR2	0	-0.44891	-0.961603
MPP6	0	-0.453004	-0.843985
YAF2	0	-0.459219	-1.20146
SPRED1	0	-0.465833	-1.36841
SRI	0	-0.467306	-1.29693
RBBP7	0	-0.479322	-0.836109
ADPRH	0	-0.480734	-1.40503
RP23-220F20-2	0	-0.486108
BAZ1A	0	-0.488163	-1.45222
VGLL4	0	-0.493505	-1.56767
PPP3CA	0	-0.502561	-1.69359
MMD	0	-0.517871	-2.09676
SH3GLB1	0	-0.521851	-1.18696
RBMS1	0	-0.555991	-1.18584
WLS	0	-0.557782	-1.1739
LAPTM4B	0	-0.564386	-1.68611
FBLN1	0	-0.592483	-1.5995
EFNB2	0	-0.610621	-1.92924
MEST	0	-0.621905	-1.05401
IGDCC3	0	-0.643882	-2.07422
PEG12	0	-0.64606	-2.7634
FLRT3	0	-0.649201	-1.84813
NRIP1	0	-0.66748	-1.94601
CSRP2	0	-0.669704	-1.13659
MCC	0	-0.672853	-3.29053
H2AFY	0	-0.674375	-1.28141
PHLDA1	0	-0.678597	-1.65562
TPM1	0	-0.724379	-1.13609
IGFBP4	0	-0.726034	-1.76142
PRTG	0	-0.746642	-1.28124
SLC25A4	0	-0.74983	-1.20185
GPC3	0	-0.750068	-1.44135
PIM1	0	-0.78086	-2.86762
PEG10	0	-0.78442	-2.57356
IGF2	0	-0.824568	-2.08866
IL17RD	0	-0.842893	-3.77989
DLC1	0	-0.84761	-3.00251
MEIS1	0	-0.877131	-3.05364
ZFP503	0	-0.894328	-2.85352
H19	0	-0.894686	-1.79972
VCAN	0	-0.897793	-2.28487
FN1	0	-0.90558	-1.97202
FBN2	0	-0.909574	-2.75957
CNN2	0	-0.932748	-2.35031
SERPINH1	0	-0.932749	-1.69413
PDGFRA	0	-0.937052	-2.76526
CCND2	0	-0.951064	-2.12025
PEG3	0	-0.95816	-1.62832
FOXC1	0	-0.968347	-3.43172
HMGA2	0	-0.972977	-1.68798
PRRX2	0	-1.15356	-2.73965
NRP1	0	-1.19251	-4.49959
HAPLN1	0	-1.28742	-4.08798
NR2F2	0	-1.30108	-4.00563
FAM212A	0	-1.30825	-4.10263
CRABP1	0	-1.36804	-2.55764
TWIST1	0	-1.46737	-3.16303
RPL37	7.79364e-308	0.21116	0.322626
PLA2G16	8.89599e-307	0.160503	1.44009
MAPKAPK2	5.10283e-306	-0.419646	-1.41712
ANXA5	7.49583e-306	-0.60701	-2.20541
NID2	1.85952e-305	-0.554759	-2.19912
CNTN2	7.44192e-305	0.0166551	3.02004
LPAR6	1.67808e-303	-0.428882	-1.35137
ISOC1	1.69692e-303	-0.347492	-0.910888
IRF2BP2	6.62265e-302	-0.457005	-1.65481
SIX3	1.27352e-301	0.327826	1.85007
MTAP	1.3543e-301	-0.334017	-0.662885
OXCT1	4.90989e-301	0.299057	1.1696
SOX9	4.43072e-300	0.428911	1.11072
MEF2C	9.86826e-299	-1.15431	-3.08257
GNGT2	3.24132e-298	0.115355	1.40771
DACH1	6.03419e-297	-0.719759	-3.1772
TFPI	8.74127e-297	-0.784832	-3.04291
RPS17	3.56319e-296	0.144418	0.204071
NXN	2.2098e-295	-0.384189	-1.0727
ARF1	2.41399e-295	-0.239412	-0.389245
EFCAB6	7.32076e-295	0.018805	2.87952
RHOB	7.61321e-295	-0.472385	-1.88791
TMEM163	1.80569e-294	0.055955	1.93868
ZFP36L1	2.07094e-294	-0.454901	-0.906749
ANAPC13	6.93006e-293	0.307021	0.572608
PYCARD	1.65104e-292	0.179535	1.34302
LPAR4	7.19081e-292	0.496737	1.03176
CBS	1.79966e-291	0.0614074	1.91461
ACOT13	2.06269e-291	0.301156	1.03262
SOX1	1.26427e-290	0.198799	0.560414
ADK	4.76997e-290	-0.323154	-0.675611
CCND1	9.86845e-290	-0.417226	-0.748032
HOXB2	1.24701e-289	-0.988186	-2.88606
CDH2	4.59463e-288	-0.511015	-1.19063
MYCN	4.67647e-288	-0.488647	-1.14953
GM45340	7.35324e-287	0.021948	2.85301
TDRD7	1.10383e-286	0.0576625	1.9843
BST2	5.53268e-286	0.210542	1.296
KDELR1	7.7484e-286	-0.314777	-0.761848
FZD8	4.76783e-285	0.14046	1.43617
RPL37A	6.04329e-285	0.182865	0.275135
TNRC18	8.99644e-285	-0.430978	-1.477
TMEM132C	3.34286e-284	-0.82213	-3.6523
ARID3A	8.59357e-283	-0.431848	-1.13282
TPM4	2.08191e-281	-0.358559	-0.643315
HS3ST3B1	2.28294e-280	-0.713036	-4.01688
CORO1A	5.50412e-279	0.0939862	1.62935
DUSP6	6.94972e-279	-0.674632	-2.78777
CXCL12	1.48712e-278	0.14432	1.28404
KDM5B	1.41925e-277	0.339334	0.572846
TSHZ1	1.50848e-277	-0.697015	-3.01411
IRX3	3.58253e-277	0.532355	1.14795
LRP2	1.24185e-276	0.285734	1.10902
ZWINT	7.00933e-275	-0.288187	-0.588542
ROBO3	9.06298e-275	0.033721	2.44605
SMAD7	1.41215e-274	-0.58648	-2.46875
TMED10	1.95395e-274	-0.260095	-0.427959
PCDH1	5.72211e-272	0.128487	1.37676
GM1673	7.06002e-272	-0.394139	-0.78665
TTYH1	1.18487e-271	0.0454649	2.0846
NRP2	7.37666e-271	-0.646045	-1.67218
DUSP9	9.39656e-270	-0.335134	-1.05064
LGI2	1.50156e-269	0.160995	1.37929
SLC2A3	1.18173e-268	1.15992	1.09262
EMB	3.32975e-268	0.742077	1.0068
RAP1A	1.4958e-266	-0.3025	-0.616868
GALNT16	2.58028e-266	0.0732156	1.79247
CBX7	2.90949e-265	0.0750573	1.68319
FAM181B	3.28005e-265	0.269474	1.06445
GMFG	6.24476e-264	0.139925	1.41063
PBX1	8.52842e-264	0.402062	0.65174
SEPT2	2.49826e-263	-0.332116	-0.740907
DEGS1	4.97928e-263	-0.392058	-1.01134
SLC38A4	2.41546e-262	-0.459303	-1.70765
EPS8	1.32476e-261	0.123277	1.46891
FAM178B	4.46486e-261	0.0749865	1.73547
EEA1	8.70197e-261	-0.4556	-1.75773
JUND	3.21435e-260	-0.379954	-0.743599
REEP5	1.34864e-258	-0.407156	-0.908616
MDK	1.38551e-258	-0.262524	-0.379818
MIF	1.59346e-258	0.184151	0.262126
H2AFJ	3.38535e-258	0.294893	0.543618
TCFL5	3.46607e-258	0.360065	1.00255
KRT8	4.44113e-258	-0.23795	-0.986903
COL1A2	8.98533e-258	-0.875619	-3.28612
XBP1	3.3479e-256	-0.373344	-0.986492
PACSIN3	4.88789e-256	0.110187	1.46237
JAKMIP2	1.23465e-255	0.136945	1.32362
ARL4C	3.61072e-255	0.429328	0.973525
ROBO2	3.6189e-255	-0.714797	-3.37136
FKBP4	6.96904e-255	0.217534	0.322657
NPR3	2.44512e-254	-0.98874	-4.9666
NR2F1	5.15587e-254	-0.966607	-2.35923
RPL6	6.73304e-254	0.158369	0.247035
RSPH1	1.65762e-252	0.0798597	1.57814
RHOU	2.46067e-251	-0.454624	-1.41259
CHRNA4	4.15515e-251	0.0310116	2.30959
JUN	5.04971e-251	-0.585252	-1.6665
DDT	6.25726e-250	0.322649	0.567676
AMOT	2.28125e-249	-0.581358	-1.71651
SSR2	2.35259e-248	-0.260133	-0.434838
CDKN1C	2.74758e-248	-0.669888	-1.21326
ERP29	5.27958e-248	-0.269792	-0.465888
VIM	9.35631e-248	-0.443985	-0.930668
STARD8	1.25591e-247	-0.939334	-3.62303
COL23A1	1.31324e-247	-0.714568	-2.5523
RPS2	1.48885e-247	-0.177735	-0.261471
SYT11	1.94834e-247	0.244224	1.0605
COL26A1	3.20706e-247	-0.868462	-3.3901
MPC2	4.47749e-247	-0.355647	-1.05753
ATPIF1	6.88855e-247	0.213953	0.334365
P3H2	2.84118e-246	-0.568845	-2.54598
ASB4	7.42038e-246	-0.860962	-4.08192
HMGB2	1.48281e-245	0.208171	0.291941
KITL	7.82894e-245	-0.717012	-3.02417
FOXB1	1.61122e-244	0.304681	1.41128
LIX1	1.94095e-243	-0.650748	-2.05863
PTN	3.0167e-243	0.767532	-0.144693
RHOBTB3	5.54265e-243	-0.306058	-0.62759
PPFIBP1	5.86548e-243	-0.409431	-1.13083
LAPTM4A	1.62774e-242	-0.277366	-0.475145
ROR1	1.84457e-242	0.139265	1.34196
RPS15	2.26708e-242	0.137887	0.197563
SPRY2	3.80285e-242	-0.542864	-1.89209
CTSL	7.73522e-242	-0.346956	-0.571487
TXNDC5	8.46818e-242	-0.307585	-0.735385
ANP32A	1.52495e-241	0.226311	0.341685
SMTNL2	8.97346e-241	0.232405	1.13499
GM10076	5.76645e-240	0.466203	0.699605
MEIS2	5.03173e-239	-0.541825	-1.0358
ZCCHC18	1.29677e-238	0.135441	1.32035
SIX1	3.09796e-238	-0.915288	-3.42652
CNIH4	7.21663e-238	-0.256693	-0.430676
GPC4	1.29031e-237	0.0913436	1.55878
SYPL	1.7933e-237	-0.338148	-0.923595
TMC4	2.95144e-237	0.22668	1.05609
FOXC2	1.50356e-236	-0.872602	-2.8613
NAV2	1.75287e-236	0.293646	0.966524
GSTT2	8.00395e-236	0.0969578	1.49399
FOXD1	8.45022e-236	-1.3281	-3.84439
TOP2B	8.56697e-236	-0.33353	-0.812187
PALLD	1.44951e-235	-0.445386	-1.16507
PAFAH1B2	5.83387e-235	-0.280284	-0.613736
OAF	6.04131e-235	-0.414157	-1.58761
LOCKD	4.46359e-234	0.142591	1.28463
ITGB1	1.18381e-233	-0.339466	-0.7074
TIMM8B	1.46302e-233	0.227866	0.388861
SMARCD1	1.63217e-233	0.328384	0.564582
PJA1	1.81409e-233	-0.308839	-0.752868
SPARCL1	1.87145e-233	-0.976049	-3.95494
RRAGD	1.9649e-233	0.466671	0.794393
RPS21	6.36181e-233	0.177532	0.268632
ACRBP	1.06134e-232	0.152407	1.27414
MID1IP1	1.66871e-232	0.279712	1.07739
ADAM10	4.32446e-232	-0.385009	-1.4055
RARG	4.88789e-232	0.184593	1.14411
RBP1	1.26182e-231	-0.45634	-0.841096
ZFP703	2.40145e-231	-0.677439	-2.45779
CTCF	2.98809e-231	0.255485	0.442089
RCN1	3.12526e-231	-0.301958	-0.669187
VBP1	3.54026e-231	0.29644	0.546589
URAH	4.56854e-231	0.0619065	1.71697
COPZ2	1.05921e-230	-0.449906	-2.20699
POLG	1.28143e-230	-0.464294	-1.34909
SELENOK	1.38828e-230	-0.271805	-0.471887
MUM1L1	5.79402e-229	-0.434249	-1.49609
SELENOF	1.33752e-228	-0.234248	-0.387274
CTBP2	2.12893e-228	0.327478	0.656074
CMTM8	6.57268e-228	0.323528	0.778018
IER2	6.63249e-228	-0.335392	-0.698087
PCDH7	3.31515e-227	-0.701484	-3.0665
RPL35A	8.06071e-227	0.140711	0.203446
SSR3	1.83725e-226	-0.287674	-0.543137
ITGA9	3.02267e-226	-0.634104	-2.94241
FSD1	1.48666e-225	0.248797	0.968526
NIPSNAP1	2.9941e-224	0.385034	0.712119
FRMD6	3.0071e-224	-0.479034	-2.0262
TM9SF3	7.45647e-224	-0.295758	-0.595008
GSC	7.57534e-224	0.0635982	2.10524
SRM	3.4405e-223	-0.308714	-0.48529
FSCN1	9.27892e-223	-0.242308	-0.368982
TCF12	1.05365e-222	-0.346508	-0.71214
IGFBP5	2.66056e-222	-0.734953	-1.7414
ZCRB1	5.90101e-222	-0.24901	-0.47591
USP29	7.17181e-222	-0.507637	-2.19847
CACNG8	1.40832e-221	0.0453341	1.85442
X2310036O22RIK	1.70466e-221	-0.219081
RPL38	2.96995e-221	0.188619	0.285767
WTIP	1.31153e-220	-0.302203	-0.704605
APP	1.86897e-220	-0.402722	-1.14348
NDUFC1	1.95321e-220	0.217474	0.37251
TGIF1	3.15716e-220	0.364448	0.784178
GALT	4.60188e-220	0.109584	1.36577
BCL11A	5.20933e-220	0.0214169	2.51234
IFITM1	7.09865e-220	0.170998	-0.328179
PTPN6	1.13411e-219	0.0872325	1.48946
KRT18	2.38635e-219	-0.308407	-0.951883
PKDCC	3.67662e-219	-0.400152	-0.849423
LRMP	1.0754e-218	0.0673848	1.66434
GPX3	1.11991e-218	-0.507746	-1.49039
FBXO44	1.78021e-218	0.124868	1.27154
F11R	8.92581e-218	0.226652	0.810088
GM2694	2.92349e-217	0.236788	0.630917
VEGFC	7.46555e-217	-0.722774	-3.51642
CRIP1	1.18451e-216	0.261508	1.02577
RPL36A	1.42536e-216	0.136503	0.200311
KRTCAP3	3.76133e-216	0.102609	1.37826
GATA6	4.40533e-216	-0.895003	-2.89205
MMP14	5.46802e-216	-0.407075	-1.44291
TCEAL6	1.77038e-215	0.062724	1.68231
NDUFV3	7.87204e-215	0.255607	0.462471
ZFPM1	1.14731e-214	-0.666888	-2.44012
SMIM14	1.63975e-214	0.2626	0.988483
ZC3HAV1L	1.89692e-213	-0.383018	-1.82807
RARB	2.38015e-213	-0.597032	-3.31611
PAM	4.06541e-213	-0.421177	-1.62824
CBX1	1.33226e-212	0.20948	0.335921
SOD2	2.06276e-212	-0.266027	-0.586614
RPS29	2.10029e-212	0.205523	0.314534
ETS1	2.35164e-211	-1.02143	-3.49082
MORF4L2	2.61468e-211	-0.267309	-0.464566
FGFRL1	2.9443e-211	-0.441803	-2.10179
SH3BP5	1.24879e-210	-0.544022	-2.52559
TSPAN9	1.59373e-210	-0.464498	-2.07099
ARPC2	1.70124e-210	-0.214145	-0.350093
SALL1	1.70466e-209	0.349552	0.896477
NECTIN2	2.28804e-209	-0.377448	-0.838185
RPL14	2.54766e-209	0.117931	0.168993
RAI14	2.94595e-209	-0.38591	-1.4656
DDOST	3.31002e-209	-0.239147	-0.423648
DNAJB11	4.51996e-209	-0.271712	-0.546021
GPR162	5.84868e-209	0.0567084	1.68084
GCAT	1.64446e-207	0.379316	0.845628
NPM3	2.84776e-207	-0.307335	-0.516738
TSPAN6	1.34778e-206	-0.268012	-0.501483
HSP90AB1	3.49925e-206	0.154841	0.22565
ZMYND8	3.66909e-206	0.370869	0.649698
TRIM12C	4.33549e-206	0.0928357	1.4361
TAF7	5.55591e-206	0.30564	0.570568
RPL34	6.5617e-206	0.126073	0.186423
SERF1	1.43075e-205	-0.337906	-0.755157
POLR2M	1.52496e-205	-0.213552	-0.348512
DCUN1D5	1.97035e-205	-0.230402	-0.404227
PDGFRB	8.08472e-205	-0.631254	-2.9262
FIGN	5.95168e-204	-0.391564	-1.10478
BAX	5.50631e-203	0.192839	0.315486
VANGL1	1.04e-202	-0.425921	-2.07066
CACNG4	3.01475e-202	0.129769	1.11388
HPRT	6.91512e-202	0.388687	0.668318
RAB14	8.56754e-202	-0.233588	-0.425013
SNAPC5	1.18691e-201	0.322006	0.636428
TBRG1	1.21805e-201	-0.252507	-0.450857
FOXP1	1.89393e-201	-0.341802	-0.752115
PMP22	3.06307e-201	-0.816533	-2.58967
RFC1	3.68841e-201	0.241596	0.435167
PPIC	7.12134e-201	-0.437821	-1.35342
P4HA1	7.55278e-201	-0.333889	-0.822
ENHO	7.84047e-201	0.204948	1.01769
ARF4	1.12646e-200	-0.245771	-0.4503
IL6ST	1.7125e-200	-0.37541	-1.39497
CCNB1IP1	2.18628e-200	0.0414711	1.99431
EDNRA	2.66347e-200	-0.614332	-3.20323
ETFB	2.98632e-200	-0.274204	-0.605162
MSH2	5.44857e-200	0.319891	0.590089
CASP3	2.14742e-199	0.330669	0.609625
GNG11	5.36011e-199	-0.659314	-2.45169
CBY1	5.96847e-199	0.311018	0.656548
DAB2	6.73508e-199	-0.543909	-1.52484
ID2	5.84901e-198	-0.0117551	-0.322738
GLUD1	1.03619e-197	-0.289765	-0.68081
IRX5	1.59686e-197	0.415297	1.00546
ETV5	5.22612e-197	-0.519368	-2.32991
NREP	9.82686e-197	-0.382325	-1.05723
ABCG2	3.22298e-196	-0.334519	-0.925863
CRB3	3.92688e-196	0.0926482	0.886328
TRP53I11	6.22581e-195	0.250515	0.938156
UQCR10	1.50713e-194	0.197273	0.326088
DNAJA2	1.57064e-194	-0.226673	-0.386283
FBLIM1	8.62303e-194	0.150759	1.07804
RIIAD1	1.33624e-193	0.0234633	1.81501
AKAP12	2.1661e-193	0.377102	0.853296
EIF1A	3.2744e-193	-0.247528	-0.447411
SELENOH	3.30507e-193	0.179674	0.274628
APBB1	6.33387e-193	0.251332	0.881824
S100A10	4.81402e-192	-0.439827	-1.02292
MRPL42	6.07033e-192	0.220559	0.393079
RGS10	1.54385e-191	0.165421	1.09531
ATP2B1	2.23181e-191	-0.26596	-0.513188
PDGFA	4.13996e-191	0.41886	0.880507
PAK1	8.42843e-191	0.364794	0.811703
MZT1	9.48627e-191	-0.292987	-0.874205
ZDHHC20	9.49636e-191	-0.312909	-0.99553
MAP4K4	1.21123e-190	0.304802	0.534389
ERMN	2.21008e-190	0.0625554	2.07851
IGFBP2	5.49342e-189	0.805498	0.790726
MEX3B	9.05832e-189	-0.385595	-1.22508
RPS19	2.16556e-188	0.115584	0.161269
CRABP2	1.19229e-187	0.768347	0.628126
TRIM54	2.12868e-187	0.0499433	1.70101
RBFOX2	2.41015e-187	-0.283386	-0.745078
FKBP9	3.12291e-187	-0.320795	-0.962857
RPL8	3.45075e-187	0.119627	0.164865
RAB2A	4.06349e-187	-0.220485	-0.369647
SLC39A8	4.26908e-187	-0.544854	-2.25829
ARHGAP31	1.00662e-186	-0.872725	-3.75825
MOGAT2	2.28118e-186	-0.353003	-0.992771
NBL1	2.93682e-186	0.0947401	0.904149
CLTA	3.63751e-186	-0.179886	-0.281686
SNAI2	1.31256e-185	-0.869419	-3.85512
IMPACT	2.08699e-185	-0.320645	-1.07147
WNT5A	3.4141e-185	-0.456949	-1.8187
UBE2D3	6.4005e-184	-0.183914	-0.281178
APLNR	8.13486e-184	-0.654042	-2.55324
FLYWCH2	8.5417e-184	0.163059	1.06789
SPCS2	3.81282e-183	-0.19509	-0.292918
SP8	8.11713e-183	0.188416	0.905307
NECTIN3	1.07068e-182	-0.288849	-0.691563
COX8A	1.40501e-182	0.161684	0.251505
TESC	2.11948e-182	0.0331619	1.93446
SPAG9	2.41883e-181	-0.288705	-0.807275
HEBP1	2.596e-181	-0.38221	-1.54504
COL4A2	2.96634e-181	-0.424323	-1.34612
MRPL14	3.28228e-181	-0.228728	-0.449431
DYNLL1	5.09912e-181	0.160194	0.235706
UBR5	6.10099e-181	0.341564	0.605782
CASK	7.54545e-181	-0.35034	-1.41584
PHACTR2	2.47436e-180	-0.371796	-1.75717
AHNAK	2.47436e-180	-0.872272	-3.31269
CAPN6	7.13134e-180	-0.803189	-3.54036
EBF2	9.61571e-180	-1.21177	-5.9334
CDC42	1.28615e-179	-0.192322	-0.317883
ITGA8	1.328e-179	-0.650886	-3.85045
GJC1	6.22173e-179	-0.27809	-0.617398
MARCKSL1	1.07265e-178	-0.18965	-0.277786
TFE3	2.27555e-178	0.213548	0.906819
SLC25A23	1.46331e-177	0.152232	1.07269
FSTL1	2.12386e-177	-0.339636	-0.83538
IGF2R	2.24944e-177	-0.395881	-1.10777
PODXL	7.19865e-177	0.323017	0.518986
ST8SIA3	7.47004e-177	0.140563	1.12779
RPL36	1.07483e-176	0.143409	0.210429
TMEM30A	1.08163e-176	-0.293975	-0.873823
HMGB3	1.64808e-176	-0.206943	-0.300836
AQP5	2.09082e-176	0.00483311	3.63411
RER1	3.15623e-176	-0.224261	-0.407533
LRRC4	4.39056e-176	0.0600454	1.50689
CRIP2	5.18404e-176	0.354711	0.57899
NDUFA7	6.544e-176	0.169674	0.286148
LPP	1.25473e-175	-0.384731	-1.67001
MT-ND6	3.76926e-175	-0.393487	-0.846078
LIG1	5.66938e-175	0.244048	0.449935
NEBL	9.03215e-175	-0.873981	-3.61822
SIVA1	1.35081e-174	0.208623	0.344315
RAB11FIP4	1.77111e-174	0.171826	1.01351
NOL7	2.11859e-174	0.215889	0.382656
MYC	4.18435e-174	-0.420014	-1.58724
CKAP4	5.74107e-174	-0.282095	-0.591298
CAPN2	7.55844e-174	-0.35245	-1.24328
COL4A1	2.47349e-173	-0.35233	-0.766677
TAX1BP3	2.86253e-173	-0.344889	-1.15514
TNFAIP1	7.00424e-173	-0.276498	-0.768657
SNRNP25	9.33675e-173	0.250247	0.482837
PLA2G12A	2.77439e-172	0.338649	0.658153
BEX1	6.30912e-172	0.701112	0.691833
ZCCHC11	6.72597e-172	-0.257994	-0.488898
MIRG	8.10667e-172	0.194235	0.959861
EFNA2	3.51815e-171	-0.358399	-1.08232
X9530068E07RIK	3.55262e-171	-0.293197
CHCHD4	7.67722e-171	-0.259378	-0.524871
ZMAT2	7.90533e-171	0.194291	0.340624
ZFHX2	1.68051e-170	0.210662	0.923273
FLRT2	2.68649e-170	-0.613812	-3.05016
SYT6	3.86131e-170	0.0261332	2.15412
RPL35	4.62149e-170	0.206092	0.309573
ARG1	5.35267e-170	-0.859929	-3.23846
PTPRA	1.10464e-169	-0.287945	-0.836131
GRB7	2.16571e-169	0.132526	0.904723
RFX4	4.5682e-169	0.138435	0.759164
ADGRL2	1.1348e-168	-0.328109	-0.692591
LRRN1	1.87198e-168	0.0755529	1.3734
IFITM3	4.53011e-168	0.304295	0.889576
SERP1	4.99787e-168	-0.241211	-0.457398
EIF3C	1.23282e-167	0.15668	0.247533
NKTR	2.19685e-167	-0.252071	-0.502828
SMARCD3	6.01366e-167	-0.563775	-2.12546
HOXB1	8.62687e-167	-0.677583	-2.36525
G0S2	1.35417e-166	0.0756026	1.37078
RPS9	1.48265e-166	0.124742	0.17928
SLC39A6	3.32538e-166	-0.313005	-1.21281
LAG3	1.00256e-165	0.0281737	1.99634
EFNB1	1.28728e-165	-0.386936	-1.11375
ISL1	1.35731e-165	-0.736779	-2.80388
GM266	1.36804e-165	-0.557576	-2.55532
YWHAB	1.39614e-165	-0.178859	-0.287327
BAMBI	2.18566e-165	-0.451196	-1.48407
TBX1	2.58349e-165	-0.7484	-2.83206
RPS23	2.71291e-165	0.0898777	0.119926
FGF8	4.71395e-165	-0.574611	-1.88631
KIF5C	1.30865e-164	0.312631	0.770818
CCDC177	1.35612e-164	0.098083	1.04155
EVA1B	1.37151e-164	-0.347256	-1.05149
CYBA	1.63323e-164	-0.323638	-0.732993
MOV10	1.8953e-164	0.0504451	1.5113
SH3GL3	2.182e-164	0.0803509	1.19982
ELAVL1	3.90786e-164	-0.203918	-0.36384
MYL12B	4.97175e-164	0.23373	0.43515
TIPARP	8.09361e-164	-0.329733	-1.03625
IDH2	2.44405e-163	-0.233634	-0.427837
TSPAN12	2.57379e-163	-0.357654	-1.32107
TUSC3	3.49409e-163	-0.260171	-0.692757
LRRN2	4.15969e-163	0.0252391	2.11071
VAMP5	4.47361e-163	-0.689415	-3.04359
SSR4	5.18602e-163	-0.215628	-0.347121
CD63	5.97089e-163	-0.319907	-0.601498
RREB1	7.05984e-163	-0.330663	-1.41533
S100A11	8.25037e-163	-0.434541	-1.68866
MCM3	1.24325e-162	0.244326	0.419284
CST3	1.50958e-162	-0.264656	-0.414726
RPS6KA3	2.153e-162	-0.342848	-1.27582
NPTN	3.66096e-162	-0.267577	-0.824924
TCEB2	3.92686e-162	0.142368	0.2244
SALL2	5.91383e-162	0.345874	0.640976
TUBA4A	2.07292e-161	0.0665057	1.20096
FBXO2	3.49442e-161	0.0449325	1.63568
TNNI1	4.15701e-161	-0.947614	-3.37567
GABRA4	1.02755e-160	0.0532211	1.54904
DLGAP3	1.45852e-160	0.0249475	2.06724
ATXN10	1.55838e-160	-0.203662	-0.382021
CD81	3.35286e-160	-0.251446	-0.427813
NSMAF	3.47172e-160	-0.303983	-1.09678
PLIN3	3.87165e-160	0.307981	0.655165
APOBEC3	5.73774e-160	0.0964381	1.18221
UQCRQ	6.10329e-160	0.194428	0.318018
RPL22L1	1.339e-159	0.140482	0.207873
TMEM5	2.5321e-159	-0.283768	-0.834414
CALR	2.74627e-159	-0.248944	-0.392223
BRI3	3.24872e-159	0.210594	0.371766
ENC1	1.28028e-158	0.192778	0.928782
BAZ2A	1.31388e-158	0.282726	0.578779
JAK1	1.32493e-158	-0.307375	-0.94605
ATP5J2	1.93842e-158	0.145308	0.225226
SSR1	3.55474e-158	-0.237627	-0.546916
FBN1	4.49375e-158	-0.448944	-2.4913
SERPINF1	4.9567e-158	-0.548984	-3.46338
PNRC1	5.77687e-158	0.316187	0.568151
MSH6	6.54167e-158	0.331037	0.660308
PGAP1	1.69351e-157	0.151316	1.05365
DNAJC19	1.91843e-157	0.218529	0.419982
PROM1	3.45708e-157	0.282122	0.785361
ESRP1	4.29921e-157	0.0673717	1.04331
DYNLL2	5.62893e-157	-0.224051	-0.397579
FNDC3B	1.26146e-156	-0.348844	-1.48962
ZFP91	1.63072e-156	-0.203919	-0.387784
KLC3	1.8115e-156	0.0729874	1.23271
BGN	2.07013e-156	-0.805779	-4.66552
PRPS2	2.42383e-156	0.247079	0.754552
MTCH1	2.98729e-156	-0.221447	-0.394447
PNMA2	3.26089e-156	0.0990232	1.15949
PPDPF	4.62776e-156	0.26344	0.485803
LAMTOR4	6.22778e-156	0.252164	0.491713
TSNAX	8.32415e-156	-0.245873	-0.634971
APPBP2	8.8188e-156	-0.245896	-0.585813
MSX1	1.05361e-155	-0.58707	-1.98526
SEPT7	1.19883e-155	-0.201739	-0.325198
RIF1	1.60775e-155	0.262425	0.456454
CUEDC1	2.3461e-155	-0.335519	-1.13546
UNC5C	3.12061e-155	-0.7144	-3.78677
X6430573F11RIK	3.80487e-155	-0.416255
RASA3	4.53216e-155	-0.458748	-2.42819
HOMER3	6.34073e-155	-0.293695	-1.04073
DERA	7.08553e-155	-0.241979	-0.554615
USP44	9.33685e-155	0.122789	1.04849
GMDS	1.16449e-154	-0.301885	-1.2439
PCNX2	1.26353e-154	0.00550694	3.40301
PKIG	1.37156e-154	-0.218459	-0.448178
B230219D22RIK	3.38386e-154	-0.221554	-0.400063
RPLP2	3.57777e-154	0.0984207	0.139216
RSU1	5.17216e-154	-0.261535	-0.692208
RPS13	6.07713e-154	0.0930335	0.131556
CELF5	7.7423e-154	0.0487957	1.55033
GNAI1	8.6217e-154	-0.310187	-1.32085
CCND3	1.43249e-153	-0.265206	-0.512687
FAM104A	1.55936e-153	-0.194042	-0.313318
SF3B2	2.02481e-153	0.174642	0.271481
SON	3.08404e-153	0.190763	0.318684
MRPS6	3.67341e-153	-0.264812	-0.57996
ADGRA2	5.91701e-153	-0.547679	-3.26816
DNAJC3	7.22186e-153	-0.283183	-0.608437
ATP1B2	9.00674e-153	0.0559453	1.49515
LIN28A	1.3888e-152	0.263513	0.442886
TSC22D1	1.8292e-152	-0.262563	-0.469035
UBE3A	1.92206e-152	-0.206344	-0.34338
RPL28	3.03536e-152	0.103208	0.148587
IFRD1	6.12262e-152	-0.28262	-0.65534
ROCK2	1.01144e-151	-0.257447	-0.563797
MAN1A2	1.07415e-151	-0.240717	-0.580304
NIN	1.30343e-151	-0.380541	-2.34604
HIST1H2AP	1.4467e-151	0.955749	1.04742
DEK	1.45193e-151	0.177362	0.279175
WDR83OS	1.63838e-151	-0.22493	-0.483928
ALKBH7	2.21888e-151	0.209333	0.838653
RCSD1	2.29969e-151	-0.694483	-3.20861
MRPL30	2.47136e-151	-0.19796	-0.337777
CNBP	4.3082e-151	-0.177067	-0.273811
GM11627	6.01159e-151	0.0986413	1.19539
CASD1	6.68222e-151	-0.29886	-1.06783
TAL2	9.69297e-151	0.114822	0.850216
EPB41L4AOS	1.75164e-150	0.305119	0.543081
A430005L14RIK	2.03446e-150	-0.239881	-0.507022
MT-CO1	2.74504e-150	0.204943	0.309455
NDUFS6	2.84077e-150	0.172618	0.285302
COLEC12	4.15059e-150	-0.35447	-1.00327
RPL26	4.43708e-150	0.0907367	0.12615
ASAP1	4.51667e-150	-0.273059	-0.717853
CLDN3	1.30156e-149	0.0448805	1.17104
MXRA7	3.23754e-149	0.234287	0.801581
ACTR10	4.01352e-149	-0.233038	-0.558777
MAGT1	1.26049e-148	-0.255324	-0.579712
YWHAH	1.99685e-148	-0.186448	-0.312621
ACAA2	2.28219e-148	-0.304125	-0.991926
TMEM123	5.93679e-148	-0.289352	-1.10373
PLAGL1	7.15418e-148	-0.553029	-2.87147
MARCH9	7.15563e-148	0.199232	0.773491
GNB4	1.44955e-147	-0.333254	-1.13124
PBX3	1.63253e-147	0.344788	0.619211
TAB2	2.36984e-147	-0.26349	-0.653251
LXN	2.70757e-147	-0.351319	-1.54681
SCUBE1	3.20204e-147	-0.428789	-2.11016
CMTM3	4.998e-147	-0.341074	-1.60652
FAM216A	8.06386e-147	-0.256452	-0.701701
ATP2B2	9.00625e-147	0.00943689	2.84007
TALDO1	1.63219e-146	0.185215	0.319486
PGM5	2.08963e-146	0.0397973	1.62128
ZEB1	4.74565e-146	-0.351806	-1.17484
DDX18	4.89643e-146	0.206131	0.365175
RPL41	6.96084e-146	0.122762	0.186258
ARHGEF15	9.30011e-146	0.0525112	1.11251
ARPC5	1.33147e-145	-0.235601	-0.465049
LIX1L	2.87423e-145	-0.316382	-1.53009
EMILIN1	3.10832e-145	-0.39714	-1.65003
NDNF	3.15032e-145	-0.63299	-3.47445
RNF165	3.2124e-145	-0.339032	-1.04852
RAB3IL1	1.25331e-144	-0.426943	-2.37778
TMEM130	1.4641e-144	0.0146845	2.38398
TCEAL5	2.26418e-144	0.117062	1.06486
AMFR	2.42164e-144	-0.274013	-0.959043
KIF1A	4.94556e-144	0.0882503	1.10463
CHST2	7.43601e-144	-0.395064	-1.3936
FZD4	9.11147e-144	-0.3903	-2.0573
BCAP31	1.65284e-143	-0.217089	-0.426337
CD302	3.37989e-143	-0.290874	-1.16138
SALL3	4.39577e-143	0.217877	0.76686
HOXA1	4.49587e-143	-0.5694	-2.01997
SASH1	7.08079e-143	0.221411	0.771294
YWHAQ	7.79755e-143	-0.15107	-0.245245
LDHC	9.24239e-143	0.0245693	1.92084
UBXN1	9.55256e-143	-0.163139	-0.260446
MFGE8	1.20047e-142	-0.296524	-0.996078
RPL27A	1.45703e-142	0.0822457	0.118815
SHF	1.49818e-142	-0.292366	-1.19096
PSAT1	1.55155e-142	-0.226542	-0.442176
LITAF	1.9699e-142	-0.280244	-0.871527
SERINC2	3.63651e-142	0.102159	1.09327
RFLNB	4.72484e-142	-0.320981	-1.21709
SLC16A13	5.15753e-142	0.109313	1.06774
CD47	5.914e-142	-0.317521	-1.00893
GNG12	6.94485e-142	-0.343769	-1.4039
SMOC1	1.06867e-141	-0.414996	-1.66219
PLCXD1	2.25167e-141	0.0322796	1.77354
RPL39	3.00072e-141	0.122234	0.18157
BCAP29	3.79156e-141	-0.291441	-1.34263
SMIM22	6.16932e-141	0.0743484	1.06028
CHD3OS	7.12597e-141	0.225981	0.816438
SRP9	7.28145e-141	-0.201731	-0.348351
CAR4	1.55073e-140	0.233299	0.0996697
ERBIN	1.58244e-140	-0.303876	-1.21831
GDAP1L1	1.7748e-140	0.0573788	1.41118
ECE1	2.77027e-140	-0.315124	-1.16698
B4GALT6	3.49011e-140	-0.34432	-1.50063
EPB41L2	4.77232e-140	-0.304896	-1.00458
ZFP516	6.60286e-140	-0.289493	-0.92639
TRAM1	9.19688e-140	-0.238644	-0.591293
PTBP3	1.88621e-139	-0.277714	-0.706477
B3GNT5	4.27572e-139	-0.286705	-1.1126
LHFP	4.38434e-139	-0.373584	-2.15566
TCF15	7.04386e-139	-0.5431	-1.99335
N4BP2	1.15586e-138	-0.270693	-0.684193
SLC6A13	1.40018e-138	0.0246978	1.96959
SPOCK2	1.89465e-138	0.0348734	1.73435
FGF10	2.52113e-138	-0.552066	-3.50079
TBX3	2.66359e-138	-0.745174	-3.89522
COLGALT1	3.52891e-138	-0.249023	-0.693477
CAMSAP3	5.00304e-138	0.109573	0.873236
TMEM97	5.00304e-138	-0.230194	-0.483754
RANGRF	6.89727e-138	0.287248	0.499255
HEG1	1.46694e-137	-0.329478	-1.94959
STT3A	1.52606e-137	-0.239217	-0.618893
COCH	1.53099e-137	0.0485	1.58523
MED28	2.13848e-137	-0.205605	-0.446053
PPIB	2.56302e-137	-0.176666	-0.278591
ARHGAP28	3.01992e-137	-0.31282	-1.18269
LRRC8C	6.51876e-137	0.120371	1.01412
SRPK1	6.63455e-137	0.187552	0.332045
TMED7	6.89051e-137	-0.234286	-0.571647
COL5A2	1.02042e-136	-0.400772	-1.85922
EGLN1	1.9299e-136	-0.27179	-0.58597
FAM49B	2.0406e-136	-0.219252	-0.454973
SPCS1	2.23976e-136	-0.190806	-0.322957
NDFIP2	2.42706e-136	-0.25306	-0.763229
TEAD1	3.10416e-136	-0.263121	-0.610956
DNAJC1	3.91853e-136	-0.295485	-0.816071
PRICKLE1	4.60343e-136	-0.358807	-2.05589
POU3F2	5.86972e-136	-0.628592	-2.90867
RPS27L	6.09356e-136	0.146964	0.217854
CLPTM1L	7.67755e-136	-0.253963	-0.790466
ARPC1A	1.33629e-135	-0.179477	-0.321078
SPEG	2.64812e-135	0.210304	0.794034
TSPO	2.95416e-135	0.298979	0.648435
KDELR3	5.27338e-135	-0.522686	-3.04859
FCOR	7.76693e-135	0.144088	0.945938
MTPN	7.94957e-135	-0.20587	-0.392087
CNIH2	8.84593e-135	0.17073	0.878554
GPX4	1.54767e-134	-0.184014	-0.290095
BZRAP1	2.09793e-134	0.0184763	2.08746
MIAT	2.11951e-134	0.0783417	0.927544
GM10260	2.17992e-134	0.203126	0.29774
ALX1	2.19243e-134	-0.562512	-2.8328
BSG	3.30233e-134	-0.151477	-0.212778
ZFP800	3.31453e-134	-0.291885	-1.20016
ZFP36L3	3.3357e-134	0.00889515	2.77858
ALDH1A2	3.57656e-134	-0.406235	-1.75503
ZFP467	3.96601e-134	0.109429	1.03509
PCK2	5.21207e-134	0.135542	0.927679
PDIA6	5.70597e-134	-0.183535	-0.278264
TFAP2B	5.97371e-134	-2.03558	-6.68206
SOGA3	7.06948e-134	0.146543	0.863327
TOR2A	3.4571e-133	-0.247849	-0.788745
CDH13	4.79413e-133	0.0700974	1.26569
ADGRB2	5.082e-133	0.0495524	1.39811
KDM6B	5.36568e-133	-0.262622	-0.685302
FAT1	5.55865e-133	0.233958	0.696374
FST	5.55865e-133	-0.219465	-0.589871
MCL1	9.25123e-133	-0.201866	-0.395539
GSTM7	1.13475e-132	0.0348038	1.69389
ADAMTS9	1.25037e-132	-0.356401	-1.69271
JDP2	1.4617e-132	-0.594743	-3.69313
ZFP706	1.46563e-132	-0.169028	-0.24807
TAGLN	1.54648e-132	-0.848452	-3.11903
CITED1	1.74971e-132	-0.533001	-1.75445
FOXP2	2.09123e-132	-0.733101	-4.29101
ASNS	2.12639e-132	-0.250325	-0.633059
RASGRP3	2.55719e-132	-0.514866	-2.39059
AGFG1	4.55921e-132	-0.236883	-0.614205
PTP4A3	6.23116e-132	-0.289957	-1.17791
MAF	7.55626e-132	-0.585066	-2.34997
RPLP1	9.80138e-132	0.137052	0.170739
ACTN1	1.21994e-131	-0.251849	-0.526287
FARP1	2.41512e-131	-0.275478	-1.05186
ERGIC2	2.53322e-131	-0.194311	-0.383992
ACTA2	2.73377e-131	-1.04248	-3.36178
SFRP2	3.88966e-131	0.258754	0.485169
HOXA2	5.19033e-131	-0.693095	-3.73767
PITPNA	5.77319e-131	-0.202881	-0.437369
SH3PXD2A	7.53446e-131	-0.303916	-1.67412
SOX6	7.71194e-131	-0.445245	-2.96634
PIANP	1.0459e-130	0.0827704	1.14295
HOOK1	1.28136e-130	0.220713	0.730669
NRG1	1.41289e-130	-0.518269	-2.79728
EIF4E2	1.62193e-130	-0.17455	-0.295416
STUM	1.77591e-130	0.0242458	2.05617
MOGS	1.8781e-130	-0.245793	-0.648635
KIRREL	2.22058e-130	-0.287789	-1.27032
HSPA5	3.62017e-130	-0.222313	-0.331745
PRKD1	5.27197e-130	-0.301398	-1.83604
CACNG7	5.79694e-130	0.0494011	1.42224
ECSCR	6.39568e-130	-0.585003	-2.79017
DAZAP2	6.90114e-130	-0.254213	-0.825697
ST3GAL5	1.02957e-129	-0.316702	-1.15089
RRBP1	1.10586e-129	-0.249198	-0.385886
CXCR4	1.30936e-129	-0.332456	-1.85986
BICD1	1.56994e-129	0.175071	0.821581
AARD	1.98169e-129	-0.329752	-1.79377
PIR	3.00238e-129	0.156495	0.823136
SDF2L1	4.42216e-129	-0.239975	-0.53542
BBX	4.63324e-129	-0.236551	-0.496493
MID1	4.7857e-129	-0.285861	-0.794941
BRI3BP	5.3229e-129	-0.216166	-0.52024
AATF	9.29835e-129	-0.236244	-0.625724
X2700046A07RIK	9.49027e-129	-0.79131
YBX2	9.80343e-129	0.0372072	1.63184
LHX1	1.39659e-128	-0.751581	-3.679
PDLIM4	3.27156e-128	-0.361274	-1.04958
FRRS1L	3.46557e-128	0.0484979	1.50855
TLN1	5.59408e-128	-0.259703	-0.581675
LAMA1	6.1958e-128	-0.313646	-1.40459
DTX3L	6.65985e-128	0.0517359	1.41215
PMAIP1	7.64642e-128	0.0592728	1.35705
RDH10	1.29576e-127	-0.328421	-1.48768
PPP1R1A	1.44212e-127	0.359306	0.50013
CELSR2	1.9571e-127	0.147734	0.682935
HAND2	2.35111e-127	-0.664325	-2.96881
CKMT1	4.86963e-127	0.0118014	2.47995
BBIP1	4.97254e-127	-0.220198	-0.559015
MTFR1L	7.66227e-127	-0.221272	-0.575323
RAP1B	8.78991e-127	-0.2056	-0.409991
GALNT7	1.28981e-126	-0.277823	-0.891905
CRYBA1	1.35172e-126	0.0196208	2.00691
OSGEP	1.54287e-126	0.233657	0.481697
AP1S1	1.59034e-126	-0.211735	-0.517292
SMAD1	2.3981e-126	-0.253316	-0.825908
ZFP462	2.79234e-126	0.325943	0.592076
KMT2E	2.96507e-126	-0.257179	-0.680721
KDF1	4.39606e-126	0.0439908	1.16622
EPHA8	5.21121e-126	0.0195071	2.0842
CD151	5.32988e-126	-0.256781	-0.770988
TTC28	1.07575e-125	-0.303543	-1.29816
CREG1	1.53152e-125	-0.299252	-0.828831
P4HB	1.94388e-125	-0.215211	-0.341535
GM12829	2.89675e-125	-0.824305	-5.40393
FOXI2	4.20409e-125	0.014344	2.25227
RPS14	4.50657e-125	0.0822264	0.119593
SNCB	9.57431e-125	0.0395165	1.5224
HOPX	1.54115e-124	-0.0459025	-0.531796
KCNJ3	1.60404e-124	0.0215713	1.99205
GM6133	2.39598e-124	-0.251268	-0.692454
CRYAB	4.18008e-124	-0.92195	-3.82042
NDUFB11	4.53876e-124	-0.167762	-0.254439
SFRP5	4.71943e-124	0.049089	0.107082
EID1	4.91626e-124	-0.195921	-0.311114
RAB12	4.96287e-124	-0.248871	-0.779139
MANF	6.7588e-124	-0.204286	-0.331541
PAX6	8.53117e-124	-0.195439	-1.01154
LEF1	1.0023e-123	-0.322428	-0.903686
CAPZB	1.07617e-123	-0.187443	-0.349174
MYRF	1.15438e-123	0.0952132	1.03375
ACP6	1.64938e-123	0.16766	0.799153
PCSK5	2.12523e-123	-0.423342	-2.83366
VLDLR	2.61515e-123	0.132309	0.956193
TRIM28	3.17303e-123	0.170944	0.259501
NPHP3	4.64603e-123	0.0917026	1.0774
MINPP1	4.67026e-123	-0.213546	-0.523756
APOE	5.59035e-123	0.683726	0.292983
DDR1	6.12266e-123	0.167337	0.807417
EI24	6.46126e-123	-0.213053	-0.550024
CEND1	7.23021e-123	0.0337705	1.56223
ACTB	7.52013e-123	-0.149776	-0.200544
GADD45G	9.6841e-123	-0.549713	-2.36271
RPS28	1.53647e-122	0.132529	0.200776
MYCBP2	1.79115e-122	-0.232347	-0.539868
LAMP2	1.97553e-122	-0.268136	-0.938477
CTSZ	2.03816e-122	-0.233279	-0.433262
FOXD2	2.16521e-122	-0.94587	-6.05674
H13	2.45264e-122	-0.227818	-0.599296
CDH11	3.36977e-122	-0.249535	-0.818846
CAR14	4.15456e-122	-0.28622	-0.672424
SAT1	7.81104e-122	-0.319737	-1.32339
DLK1	1.15394e-121	-0.49865	-1.77949
GYG	1.23348e-121	-0.32669	-0.949362
RUFY3	1.98843e-121	-0.274676	-1.13278
SOX21	2.28012e-121	0.176242	0.576231
CNN3	2.48606e-121	-0.201039	-0.338667
HIRIP3	5.11248e-121	0.294773	0.507032
RHEB	5.41512e-121	-0.18404	-0.326442
LZIC	9.83743e-121	-0.240919	-0.79915
GMFB	1.16463e-120	-0.224795	-0.570471
HIST1H2AK	1.3867e-120	0.57599	0.825122
KDR	1.62962e-120	-0.69939	-2.67609
PBX2	1.74408e-120	-0.208225	-0.498301
CALD1	1.7738e-120	-0.248369	-0.409978
MYL12A	2.02991e-120	-0.202569	-0.348434
PLAT	2.13674e-120	-0.333475	-1.95521
ARL1	2.22955e-120	-0.175896	-0.301975
HIST1H4D	3.17812e-120	0.331171	0.726477
NAF1	4.5363e-120	0.241605	0.46181
TNNT3	4.77941e-120	-0.517165	-3.35054
RPS26	5.30267e-120	0.0980281	0.143525
GAP43	5.6262e-120	0.109626	0.1978
DQX1	5.82766e-120	0.183515	0.951052
RASAL2	7.06307e-120	0.197906	0.725017
CREB3L2	7.09911e-120	-0.299195	-1.53094
PAK3	7.36076e-120	0.0900001	0.760621
RPS8	8.40583e-120	0.0833998	0.126058
X4933434E20RIK	8.57122e-120	-0.255932
PREX2	9.82107e-120	-0.289488	-1.33455
CALU	1.48016e-119	-0.231355	-0.543854
HES3	2.18141e-119	-0.00776155	-0.279065
FHL1	2.53012e-119	-0.26369	-0.684594
TSPAN3	3.59695e-119	-0.184947	-0.309419
PTGDS	3.73702e-119	-0.537488	-3.03969
PSMB1	3.87089e-119	-0.135661	-0.208588
IGLON5	4.7563e-119	0.0693977	1.13797
SGCE	5.9533e-119	-0.270667	-1.13034
TNNT2	7.11627e-119	-1.00364	-3.53172
EXOSC2	7.27709e-119	0.401261	0.656869
BMP2	9.74505e-119	-0.619867	-3.0675
PJA2	1.05992e-118	-0.25307	-0.7852
POLR2L	1.30622e-118	0.319706	0.555444
NKX2-5	1.90745e-118	-0.855899	-3.53992
GNAS	1.92575e-118	-0.147946	-0.22532
COL9A3	2.02041e-118	0.0766006	1.09472
CAMK2D	3.47699e-118	-0.291202	-1.32833
EBPL	4.911e-118	-0.226129	-0.580729
NEDD9	5.09414e-118	-0.368901	-2.56823
NAA50	8.06647e-118	-0.183508	-0.315093
CDC42EP1	8.5041e-118	-0.360156	-2.52348
SOX10	9.76263e-118	-1.39234	-5.41941
JAG1	1.09161e-117	-0.329163	-1.27187
UQCR11	1.1376e-117	0.148905	0.248702
NOP16	1.13965e-117	-0.197842	-0.418991
SPIN2C	1.37818e-117	-0.346044	-1.32613
SDCBP	1.60258e-117	-0.223496	-0.566648
TMEM33	2.22901e-117	-0.205958	-0.482235
SNRPD2	4.37578e-117	0.120136	0.185395
GPR85	4.79329e-117	0.050185	1.37849
DMBX1	4.80985e-117	0.0326745	1.61198
FAM173A	5.45997e-117	0.243293	0.575293
COL11A1	6.53235e-117	-0.373025	-2.29347
SURF4	8.38491e-117	-0.213357	-0.423429
RPL18	9.71097e-117	0.0892971	0.132527
ERO1L	1.07393e-116	-0.253975	-0.785809
MIR9-3HG	1.09348e-116	0.0213624	1.8795
HAS2	1.24499e-116	-0.430241	-1.7853
LRRFIP1	1.25063e-116	-0.263497	-0.711395
TMED5	1.27116e-116	-0.232171	-0.567037
ACTR3	1.46601e-116	-0.187454	-0.367275
MRPL28	2.74247e-116	0.164062	0.299357
X1700023F06RIK	3.18006e-116	0.0318313
COQ2	3.74262e-116	-0.22636	-0.712484
ATP2A2	4.09387e-116	-0.230486	-0.436569
PTPRZ1	4.33364e-116	-0.332295	-1.52109
HCFC1R1	5.30244e-116	0.244303	0.679332
PDIA5	5.93549e-116	-0.265417	-1.34669
EBF3	6.39089e-116	-0.568756	-3.863
APRT	6.78632e-116	-0.177039	-0.260686
MAP1B	7.07899e-116	0.600027	0.551277
UPP1	7.62679e-116	0.0433827	-0.040281
ATP5E	8.50259e-116	0.143673	0.223316
BTG2	1.10423e-115	0.132303	0.86231
PLEKHO1	1.16117e-115	-0.24487	-0.70376
RNF130	1.44667e-115	-0.240382	-0.698199
D1ERTD622E	1.75868e-115	-0.284064	-1.66544
PTPN13	2.10214e-115	0.31872	0.585351
TCF21	2.48989e-115	-0.774556	-4.13492
PPWD1	3.07297e-115	0.266412	0.555162
CHD4	3.17079e-115	0.186754	0.28609
KRCC1	4.05492e-115	-0.243262	-0.644389
SEC11A	4.80579e-115	-0.160314	-0.23133
RUNX1T1	4.95438e-115	-0.411177	-2.29834
PTMA	5.47533e-115	0.124629	0.170051
GORASP2	5.60564e-115	-0.211207	-0.493241
NR2F6	5.96413e-115	-0.226137	-0.485019
TSPAN17	9.33528e-115	0.032157	1.61
ADGRL3	1.00047e-114	-0.311928	-1.73018
COL18A1	1.18124e-114	0.39473	0.540396
TUBB2B	2.10533e-114	-0.24245	-0.594354
CTGF	3.23231e-114	-0.394005	-2.48497
POLR2E	3.6577e-114	-0.147646	-0.222508
GOT1	4.10709e-114	0.23984	0.473012
SYT7	4.20627e-114	0.0811734	1.02925
SAV1	4.57221e-114	-0.23963	-0.779166
SET	6.77104e-114	0.136719	0.183586
COL13A1	7.41931e-114	-0.350989	-2.05974
RPL12	1.41287e-113	0.0900572	0.12152
ACSL4	1.49732e-113	0.173574	0.776351
HMGA1-RS1	1.6346e-113	0.279945	0.509864
MYH14	1.6346e-113	0.030866	1.59661
EDN1	2.14029e-113	-0.947271	-5.3926
CDK7	2.27317e-113	-0.195665	-0.443893
MBNL2	2.42576e-113	-0.277779	-1.06817
GGCT	3.84584e-113	0.209384	0.677238
TCF4	4.36587e-113	-0.218891	-0.418753
ILDR2	6.59264e-113	-0.0729598	-0.416844
TEAD4	8.14471e-113	-0.418024	-3.27809
NEXN	9.31428e-113	-0.468074	-1.71333
X2410080I02RIK	1.23641e-112	0.0100597
PGM2	1.27777e-112	0.263636	0.633382
F630040K05RIK	1.31313e-112	0.0118991	2.35444
PHACTR3	1.95364e-112	0.0163105	2.1581
PTP4A2	1.98282e-112	-0.203785	-0.35877
BICC1	2.273e-112	-0.334691	-1.55311
SPATS2L	2.66504e-112	-0.299564	-1.46077
UBL3	2.71945e-112	-0.266917	-0.801443
BMP4	2.84731e-112	-0.528007	-2.47295
DND1	3.13736e-112	0.0495787	1.35535
NUDT4	3.98816e-112	-0.229039	-0.518864
GABARAP	4.68988e-112	-0.179437	-0.305115
SVEP1	6.20447e-112	-0.425692	-2.83015
TGFB2	8.78851e-112	-0.433305	-1.69352
HTRA2	9.21554e-112	-0.231433	-0.647028
BTRC	9.44651e-112	0.168761	0.69877
CCDC28B	1.08099e-111	0.218917	0.597206
RPRM	1.16461e-111	-0.363499	-1.76731
BMI1	1.54295e-111	-0.248527	-0.964688
RHOJ	2.57671e-111	-0.829962	-4.31052
ATP1A1	4.11596e-111	-0.217745	-0.428183
POPDC2	4.62087e-111	-0.759497	-3.96573
BCAT2	4.70478e-111	0.224884	0.634199
RCC2	4.76488e-111	0.181286	0.291977
PURB	5.74765e-111	-0.190547	-0.348623
RPS20	7.66984e-111	0.0889791	0.136288
USP14	1.01071e-110	-0.183398	-0.343964
GABRA3	1.52542e-110	0.0180636	1.96483
PTTG1	1.59767e-110	0.230982	0.421664
CARMIL2	1.6618e-110	0.0192779	1.9786
ZDHHC2	1.7075e-110	0.178466	0.742621
ZFP422	2.33007e-110	-0.215026	-0.479553
CAPSL	2.40386e-110	0.0441103	1.01113
BCL2	3.52886e-110	-0.282305	-1.48289
CHD3	6.24579e-110	-0.265739	-0.769232
SMAD3	6.25972e-110	-0.254634	-1.31875
ABCG1	7.61217e-110	0.0199567	1.82964
POLR1D	8.81265e-110	-0.14507	-0.212307
MEOX1	9.56876e-110	-0.508949	-2.35613
TRIL	1.213e-109	-0.358355	-2.10112
FYTTD1	1.34324e-109	-0.195874	-0.437537
X1810041L15RIK	1.54207e-109	0.0234908
BACH2	2.42943e-109	-0.271662	-1.60122
SLC27A2	3.36266e-109	0.0158789	2.11147
PTPRD	3.46341e-109	-0.306348	-1.65355
PFDN2	3.9498e-109	-0.169397	-0.281403
ITPR1	5.95025e-109	-0.285142	-1.2206
PLCD4	6.35622e-109	0.0136858	2.12739
CDH9	7.56047e-109	0.00234544	3.92563
SPTSSA	9.09903e-109	-0.180325	-0.3273
HERPUD1	9.12563e-109	-0.24867	-0.836612
NDUFAF3	1.87688e-108	0.210172	0.576101
DOK4	1.88353e-108	-0.447632	-2.43885
NR6A1	2.09275e-108	0.335967	0.489724
LPAR1	3.02258e-108	-0.162489	-0.53458
DST	3.09914e-108	0.281658	0.648433
AEBP1	3.37656e-108	-0.314022	-1.94282
ARHGAP1	3.7072e-108	-0.246499	-0.840877
RHOF	3.87521e-108	0.0245909	1.7214
GSTM5	4.41822e-108	-0.224317	-0.412485
BRE	5.76073e-108	-0.228023	-0.797163
RPL6L	6.61145e-108	-0.171488	-0.284714
TMX1	7.32905e-108	-0.20752	-0.552904
BSPRY	9.24466e-108	0.0365197	1.27527
SRP14	9.67401e-108	-0.148801	-0.224265
NFIL3	9.6778e-108	-0.272677	-1.13213
CHSY1	1.4024e-107	-0.242986	-0.82214
FBLN2	1.87317e-107	-0.331628	-1.86828
IGSF3	2.18857e-107	-0.2667	-1.03553
SPCS3	2.41383e-107	-0.234444	-0.713793
TMCO1	3.69866e-107	-0.180836	-0.324694
EYA1	3.73838e-107	-0.302903	-1.60746
TOMM5	3.86687e-107	-0.171904	-0.261261
CDC42SE1	4.47014e-107	-0.227884	-0.668996
RCN2	4.50493e-107	-0.202385	-0.383686
DDR2	4.70109e-107	-0.941226	-5.35509
USP25	5.62011e-107	-0.24933	-0.851194
HRAS	6.58017e-107	0.169997	0.319657
NPY1R	7.5644e-107	0.00315402	3.59318
ILK	7.7879e-107	-0.218516	-0.546838
CLDND1	1.12941e-106	-0.210962	-0.550288
LYAR	1.24239e-106	0.176832	0.296763
ZFP9	1.92553e-106	-0.510979	-4.10981
RP23-145I16-5	2.0852e-106	-0.439219
PLOD2	2.15839e-106	-0.256228	-0.628869
CHST14	2.30866e-106	-0.261398	-1.95412
A330070K13RIK	2.87802e-106	0.00175169	4.04542
MYL7	3.22566e-106	-0.136448	-0.969821
PRDM6	4.09181e-106	-0.630564	-3.94421
GALNT9	4.42048e-106	0.0163016	2.01758
TMEM37	5.51906e-106	-0.323113	-1.58594
GAS1	7.76089e-106	-0.259667	-0.672857
CECR2	9.94905e-106	0.300063	0.507111
X2810417H13RIK	1.18501e-105	0.298992
PDPN	1.28804e-105	0.0892787	0.750094
PRKCE	2.14603e-105	-0.279726	-1.74667
UGP2	2.30252e-105	-0.236736	-0.826207
PPP4C	2.30911e-105	-0.18374	-0.382518
TAGLN2	2.58118e-105	-0.248948	-0.492794
KEAP1	2.65857e-105	-0.231176	-0.828047
CCDC85A	3.03277e-105	0.00941648	2.48167
RSL24D1	3.40991e-105	-0.180959	-0.328954
TBX20	3.98013e-105	-0.70389	-3.70347
HINT2	4.69335e-105	0.241767	0.519008
STIM1	5.21855e-105	0.0905224	0.954775
COX7B	5.99623e-105	0.132057	0.200688
MRPS26	6.27569e-105	-0.17854	-0.343354
PDLIM5	6.42358e-105	-0.283972	-1.17704
PIN4	8.34698e-105	0.169988	0.333447
WNT2	8.84593e-105	-0.756932	-3.81976
HAUS1	1.49497e-104	0.19657	0.405704
FAM107A	1.93408e-104	0.0135442	2.09261
APLP2	3.07457e-104	0.207508	0.397892
UBE2D2A	3.45549e-104	-0.147594	-0.242901
EXOC5	6.38375e-104	-0.231003	-0.673215
HOXB4	6.98652e-104	-0.6757	-3.72998
NUDC	7.91495e-104	0.149066	0.232148
COL9A1	8.5173e-104	-0.382986	-2.24162
CXXC4	1.42594e-103	-0.258141	-1.00275
COL2A1	1.61719e-103	-0.222175	-0.693354
PRSS8	2.2581e-103	0.0419281	0.120889
XPOT	2.53659e-103	-0.223254	-0.604397
MAX	3.52637e-103	-0.210712	-0.573429
PLP1	3.71545e-103	-0.328865	-1.28701
RALY	4.1307e-103	0.151649	0.25739
GM44257	4.50907e-103	0.0150951	2.1303
LMO4	4.8333e-103	-0.26046	-0.414322
VEZF1	9.00602e-103	-0.219392	-0.450023
A730017C20RIK	1.00278e-102	-0.385489	-2.8973
CHIC2	1.15714e-102	-0.180977	-0.366122
H2-Q4	1.18933e-102	0.0517641	1.25593
CNN1	1.21612e-102	0.0482214	0.565727
ITPK1	1.39531e-102	0.114006	0.839467
UCHL1	1.40507e-102	0.0779221	0.0079929
X5930412G12RIK	1.40507e-102	-0.273278
TIMP3	1.51319e-102	-0.361512	-1.96217
EN1	2.1159e-102	0.0805339	0.184239
TES	2.26002e-102	-0.216622	-0.729274
SCOC	2.4322e-102	-0.194957	-0.416547
TTC3	2.99195e-102	-0.176464	-0.278967
RPS12	4.26155e-102	0.081845	0.114032
GNB1	5.77892e-102	-0.149449	-0.253581
AIDA	6.84864e-102	-0.220662	-0.669325
THBS1	8.35046e-102	-0.520417	-3.0016
NEFH	9.22679e-102	0.0598013	1.16157
RGS5	9.93726e-102	-0.608069	-3.66456
PRDX3	1.03102e-101	-0.206346	-0.535583
TXNL1	1.11887e-101	-0.140368	-0.230098
GLOD5	1.15762e-101	0.00823286	2.53776
TYRO3	1.20382e-101	0.172132	0.701149
KLF3	1.30307e-101	-0.256861	-0.684312
NRARP	2.17647e-101	-0.335074	-2.23379
MYDGF	4.09896e-101	-0.175898	-0.346223
CPNE4	4.46186e-101	0.0166872	1.82039
PPP1CB	5.74418e-101	-0.194573	-0.392234
NDUFB9	8.40003e-101	0.136345	0.241174
CGGBP1	1.07922e-100	-0.199319	-0.431784
B4GALT1	1.26779e-100	-0.237659	-1.08031
PACSIN2	1.5476e-100	-0.239381	-0.863318
HLF	2.58463e-100	-0.379483	-2.59973
SLC45A1	2.59297e-100	0.010534	2.37067
TXN2	2.99337e-100	-0.166238	-0.308847
SEPT10	3.20209e-100	-0.229958	-0.781833
RAB8B	3.60197e-100	-0.236252	-1.03217
CLIC1	3.77631e-100	-0.234589	-0.397948
OTX2OS1	4.34792e-100	0.0204098	1.7131
SPRY1	4.5872e-100	-0.266309	-1.20608
RPL24	4.92253e-100	0.0706071	0.107025
FEZ1	5.23118e-100	-0.345488	-1.95927
PDIA4	5.66911e-100	-0.206788	-0.416801
CLSTN3	5.74593e-100	0.0460412	1.27924
GLRX5	7.63231e-100	-0.154894	-0.266911
RGL1	7.93121e-100	-0.244114	-1.15183
CPT1C	7.95681e-100	0.0868896	0.981015
RAPH1	8.08322e-100	-0.234266	-0.613068
CSRP1	8.31025e-100	-0.271796	-1.02155
PLXNA4	9.98761e-100	-0.558177	-3.94427
PODXL2	1.12679e-99	-0.246811	-1.71904
CYR61	1.15996e-99	-0.314816	-1.64195
PIK3R1	1.48393e-99	-0.263929	-1.2581
PBK	1.66523e-99	-0.213323	-0.563521
RALA	2.0827e-99	-0.161032	-0.260594
SCAF11	2.58598e-99	-0.178244	-0.285981
RANGAP1	2.70509e-99	0.204061	0.360183
CDCA8	2.90824e-99	0.211659	0.333506
PPP1R14A	3.00637e-99	0.121388	0.597842
YAE1D1	3.82675e-99	-0.183373	-0.352889
PPP2CB	4.20767e-99	-0.209432	-0.612101
CENPW	5.0624e-99	0.182084	0.357501
PPFIBP2	5.4003e-99	-0.428009	-3.41575
RGS3	6.31096e-99	-0.263077	-1.4571
APOBEC2	6.46788e-99	-1.16677	-7.19892
DACT3	6.60293e-99	-0.283848	-2.00341
MAST1	9.58042e-99	0.0083963	2.51593
MXD4	9.81236e-99	-0.254291	-0.902977
COX5A	9.88241e-99	0.124816	0.201879
THSD4	1.10982e-98	-0.317744	-2.59635
PRDM1	1.12292e-98	-0.363651	-2.48782
USP46	1.35836e-98	-0.225181	-0.678053
CNIH1	1.41116e-98	-0.165218	-0.303577
TNNT1	1.47559e-98	0.107592	0.812393
HOOK3	1.61088e-98	-0.234368	-0.708569
MLEC	1.64874e-98	-0.180589	-0.345961
TTC9B	2.07403e-98	0.0193076	1.92127
EBF1	2.15357e-98	-0.235232	-0.931418
ZHX1	2.20954e-98	-0.244864	-1.03914
PON2	2.50708e-98	-0.26286	-1.58269
AP1AR	3.27951e-98	-0.20079	-0.496966
MAPK12	3.99142e-98	0.176085	0.609849
IGFBPL1	5.65578e-98	-0.149474	-0.662264
RNF10	1.13381e-97	0.184926	0.361999
ZFP985	1.3009e-97	0.0625872	1.1238
HCN4	1.8671e-97	0.0273932	1.35302
CCDC141	1.8987e-97	-0.741698	-4.02294
RAPGEF5	2.57627e-97	0.0680792	0.923825
LY75	3.07159e-97	-0.245994	-1.09807
P4HA2	3.37094e-97	-0.244733	-0.944116
RBM39	3.63171e-97	0.118076	0.184669
ZADH2	3.72129e-97	-0.259852	-1.95168
PYGO1	4.63782e-97	-0.273244	-2.07862
URI1	4.80623e-97	-0.192504	-0.42624
AURKAIP1	5.17417e-97	0.168792	0.338058
LY6H	6.4472e-97	0.0477347	0.905982
X1700007K13RIK	1.04118e-96	0.0269702
CENPF	1.0845e-96	0.342708	0.433464
SMIM19	1.14721e-96	-0.221067	-0.821196
FAM171A1	1.24296e-96	-0.237298	-1.27615
REXO2	1.81596e-96	-0.172761	-0.294029
VAMP8	1.97628e-96	0.0322364	-0.0853292
LAMA4	2.00173e-96	-0.520379	-3.90559
ST7	2.03752e-96	-0.228529	-1.44721
KLF6	2.40463e-96	-0.26858	-0.977141
DICER1	2.45379e-96	-0.177813	-0.377749
POU2F2	2.46172e-96	0.0442863	1.24311
GOLT1B	3.82794e-96	-0.207521	-0.549945
ADAMTS8	4.05168e-96	0.00931331	2.4417
MAPK13	6.09423e-96	0.0531262	0.821615
PSPC1	7.37417e-96	0.245267	0.474618
SLC35F2	7.39375e-96	0.0722053	1.02082
ADD1	9.4299e-96	-0.21708	-0.631404
SPTBN1	9.72096e-96	-0.269895	-0.603378
FHOD3	1.031e-95	-0.272212	-1.52995
MTMR7	1.23457e-95	0.0596607	1.08777
TNK1	1.50383e-95	0.0274407	1.37589
DFNA5	1.60516e-95	-0.209963	-0.64147
NIT2	1.91944e-95	-0.199038	-0.55504
IL1RAPL1	2.69325e-95	0.00944711	2.22775
CLMP	3.15408e-95	-0.266592	-1.29851
OTUB1	3.2276e-95	-0.178207	-0.406887
SMCO4	3.86776e-95	-0.196235	-0.470677
GM12408	5.0998e-95	0.0020167	3.98766
TAC1	5.89482e-95	0.0266131	1.3656
WWC1	6.01547e-95	0.184637	0.603725
PDCD5	7.89658e-95	-0.144976	-0.214168
ELK3	8.49705e-95	-0.32721	-1.87227
MRPS33	9.97199e-95	-0.152126	-0.240172
SAE1	1.7847e-94	0.142185	0.242028
FOXF1	1.7847e-94	-0.494143	-2.89477
PARVA	2.01722e-94	-0.226842	-0.822492
MED6	2.21453e-94	-0.194703	-0.541638
MT2	2.27286e-94	0.068248	0.343038
UBASH3B	2.53017e-94	-0.291637	-1.86529
MIEN1	2.59288e-94	0.200998	0.408694
PET100	2.78497e-94	0.224872	0.472641
ATP5B	3.2852e-94	0.142553	0.212801
LETMD1	9.65529e-94	-0.223794	-1.53183
PLSCR3	1.1911e-93	-0.218228	-0.937866
FEZF2	1.21967e-93	0.0410288	1.26154
PMM1	1.477e-93	0.24083	0.509818
ZFHX4	1.55707e-93	-0.281971	-1.2773
X1700027J19RIK	2.43111e-93	0.249827
RPL22	2.68327e-93	0.0763834	0.109365
TMEM263	2.85688e-93	-0.227518	-0.852801
XKR4	3.53204e-93	0.00878788	2.31865
MESDC1	4.55697e-93	-0.220698	-0.787762
KCNK1	4.57705e-93	0.136677	0.60758
TMEM55A	4.70406e-93	-0.211092	-0.607867
SYCE2	9.04555e-93	0.257563	0.479292
AI314180	9.27971e-93	-0.207732	-0.552975
TM4SF5	9.7046e-93	0.0231085	1.21765
TMED9	1.07871e-92	-0.155459	-0.260359
RFTN2	1.50134e-92	-0.485445	-3.90347
NAB2	1.71751e-92	-0.303619	-2.31795
LAMB1	1.92248e-92	-0.235546	-0.701947
MGAT4B	1.93396e-92	-0.217082	-0.758801
TSHZ2	2.37463e-92	-0.264432	-1.44131
TPD52	2.42479e-92	0.154388	0.523889
SLITRK5	2.50274e-92	0.0666071	0.890328
GAMT	2.97647e-92	-0.225533	-1.11975
BMPR2	3.19617e-92	-0.230033	-1.06402
NUCKS1	3.65532e-92	0.12719	0.190938
MRPL41	3.76171e-92	-0.162938	-0.313261
LUM	3.81482e-92	-1.17824	-5.11862
RHOA	4.24881e-92	-0.133637	-0.213669
JADE2	4.7892e-92	0.0255717	1.54158
LTBP1	6.71868e-92	0.124143	0.729231
DGCR6	6.96684e-92	-0.162864	-0.29447
CMTM7	7.01296e-92	-0.198203	-0.516049
METTL9	7.99055e-92	-0.149482	-0.230462
TFG	9.97625e-92	-0.167562	-0.34462
HSD17B12	1.17223e-91	-0.177701	-0.370019
HIPK2	1.19658e-91	-0.216295	-0.555365
PRUNE2	1.42815e-91	0.0249542	1.53822
ECHDC2	1.48545e-91	0.15296	0.686964
CEP170B	1.56004e-91	0.0825802	0.785134
ANP32B	1.71655e-91	0.11744	0.16939
EVI5	1.74342e-91	-0.212671	-0.6122
SPG20	1.76818e-91	-0.219099	-0.72297
HECTD1	1.84676e-91	-0.180179	-0.398685
CASC4	2.23507e-91	-0.214321	-0.660896
PAPSS1	2.90844e-91	-0.201374	-0.520091
EFHD2	2.98757e-91	-0.228486	-0.960653
RBM3	3.21739e-91	-0.137945	-0.223607
EFCAB10	3.36672e-91	0.0487579	0.887358
CDON	3.5852e-91	-0.244946	-1.24254
ABL1	4.6711e-91	-0.211888	-0.667727
ZC3H7A	6.61922e-91	-0.226821	-1.04933
UBR2	7.93911e-91	0.211813	0.54612
PAX3	8.29128e-91	-0.37972	-1.3128
HIST1H4H	1.03568e-90	0.150972	0.814577
FAM120A	1.1612e-90	-0.210934	-0.648542
VAPA	1.17401e-90	-0.138844	-0.221351
COX7A2	1.63884e-90	0.102544	0.166562
UBFD1	2.32572e-90	-0.168009	-0.370489
STRA6	3.03135e-90	-0.259373	-1.30843
HK2	3.36481e-90	0.265531	0.441025
IRX2	3.81573e-90	-0.307127	-1.36773
JAK2	4.34366e-90	-0.272086	-2.30426
ABRACL	4.39582e-90	-0.168118	-0.259351
STX18	4.86555e-90	-0.207926	-0.684494
EPHB1	6.24238e-90	0.136323	0.62477
SFR1	6.455e-90	0.127972	0.217475
RASIP1	6.61444e-90	0.0491692	0.331772
HALR1	6.69382e-90	-0.768559	-4.84997
ALG5	6.81231e-90	-0.204553	-0.690334
MRPS10	8.33521e-90	-0.161126	-0.323092
TULP4	8.5554e-90	-0.209014	-0.574999
DCUN1D1	1.41204e-89	-0.194827	-0.507451
CAMK1	1.41529e-89	-0.210515	-0.965708
PIM3	1.61755e-89	-0.226295	-0.664557
MSRB2	1.61928e-89	0.0631317	1.05847
RPL9-PS6	1.97206e-89	-0.15028	-0.229665
DGKA	1.98138e-89	0.0287763	1.47512
DHFR	2.1563e-89	0.186255	0.367557
ID1	2.18575e-89	-0.394901	-0.793251
CDH4	2.45519e-89	0.0841327	0.946114
ZFP428	2.87011e-89	-0.174548	-0.325377
PRSS23	2.95606e-89	-0.279932	-1.56859
UBC	3.03085e-89	-0.210107	-0.379886
MGAT2	3.1413e-89	-0.196189	-0.495797
RAB1A	3.44798e-89	-0.173391	-0.360518
PLCH1	4.51094e-89	0.0972504	0.366877
RPN1	4.65588e-89	-0.181905	-0.341163
FZD1	4.79698e-89	-0.244	-1.74957
NR1H5	7.29325e-89	0.268521	0.52262
MAGED2	7.46414e-89	-0.200564	-0.524769
SIAH2	7.54583e-89	-0.250881	-2.06063
DNPH1	8.91747e-89	0.238793	0.447425
PLK2	1.09595e-88	-0.413395	-2.82758
ARF6	1.12411e-88	-0.186817	-0.454787
CELF4	1.22082e-88	0.104136	0.79573
VAMP3	1.41868e-88	-0.175255	-0.392647
PLIN2	2.15607e-88	-0.207017	-0.613165
HOXB3	2.25656e-88	-0.438506	-3.43018
PMF1	3.04736e-88	0.17237	0.347811
LGR4	3.13223e-88	0.128242	0.676028
DCTD	3.3948e-88	-0.195678	-0.542321
FAM110B	3.49257e-88	-0.222741	-1.06443
AFAP1	3.70388e-88	-0.227396	-1.35901
OST4	5.65901e-88	-0.161022	-0.229689
PTP4A1	5.8158e-88	-0.176275	-0.349254
LAP3	5.85187e-88	-0.154807	-0.262677
SIX2	6.51183e-88	-0.431818	-2.74422
CFC1	7.12502e-88	-0.348622	-1.76847
CAR2	8.15361e-88	-0.27734	-0.853969
PAX8	8.94008e-88	-0.67262	-3.94809
PSMD7	9.55205e-88	-0.144518	-0.225807
DPYSL2	9.89153e-88	-0.218372	-0.545418
EML4	1.01115e-87	-0.180735	-0.331316
SMIM10L1	1.02057e-87	-0.204953	-0.557865
CRTAP	1.02882e-87	-0.213717	-0.936312
HES5	1.06968e-87	-0.0874994	-0.789681
CBFB	1.31861e-87	-0.209163	-0.63357
STARD10	1.42099e-87	0.0979616	0.275499
NDUFB7	1.50879e-87	0.135086	0.243605
KCNJ12	1.58858e-87	0.0302118	1.53068
MGME1	1.73417e-87	0.196962	0.525598
DNAJA1	2.23734e-87	0.109413	0.162211
MLLT3	2.77777e-87	-0.240352	-0.70853
ATG3	3.21976e-87	-0.194194	-0.526386
GLS	3.66334e-87	-0.212957	-0.559985
EVL	3.79188e-87	-0.180308	-0.425432
DNAJC8	3.92244e-87	0.126864	0.21738
CACYBP	4.77554e-87	-0.141244	-0.211986
KLHL22	5.17692e-87	-0.213123	-0.886274
TRIM46	5.31357e-87	0.0412011	1.2218
FNDC4	6.94523e-87	-0.201408	-0.635242
TGFB1I1	7.18356e-87	-0.294134	-1.78013
SKP2	8.49151e-87	-0.187078	-0.437233
RPP25L	9.15636e-87	0.16988	0.349172
IQSEC3	1.26058e-86	0.00426905	3.00389
DMKN	1.31268e-86	0.0135617	1.62691
ARHGAP29	1.3478e-86	-0.243271	-0.654922
KMT5A	1.4395e-86	-0.157857	-0.282765
BDNF	1.44319e-86	0.0474044	1.18628
ID3	1.58951e-86	-0.239407	-0.405478
CD59A	1.86692e-86	-0.26329	-1.02382
CER1	2.37984e-86	-0.492697	-2.95753
SLMO1	2.96794e-86	0.109655	0.772375
CCNE1	3.40727e-86	0.30615	0.465434
C130026L21RIK	3.70625e-86	-0.291232	-2.25068
PARP1	3.80299e-86	0.176782	0.289324
SDC3	3.86927e-86	-0.278927	-1.66405
B9D1	4.08906e-86	0.220419	0.448092
ST14	5.04655e-86	0.0366048	0.853385
SLC39A10	5.24948e-86	-0.197151	-0.421867
SLC16A11	5.73142e-86	0.0118454	2.07868
PDHA1	7.4907e-86	-0.188033	-0.372753
SERBP1	7.77953e-86	0.0930143	0.126045
ENPP2	9.2501e-86	-0.386622	-2.83781
BLNK	9.87153e-86	0.0357097	1.31938
GSTT1	1.07923e-85	0.0457961	1.05019
MPC1	1.11345e-85	-0.204063	-0.95665
CLIP3	1.28988e-85	0.191169	0.588726
SNRPG	1.44829e-85	0.126226	0.198536
NPNT	1.48573e-85	-0.359487	-2.51326
PRKAR1A	2.35144e-85	-0.162838	-0.313112
HDDC2	2.47299e-85	-0.163639	-0.324498
DMRTA2	2.53475e-85	-0.328029	-2.48198
MYO6	2.81239e-85	-0.317652	-1.85541
PITX2	3.12653e-85	-0.368014	-2.10603
CRK	3.14175e-85	-0.190716	-0.472527
CCDC136	3.76358e-85	0.203076	0.564951
ARHGDIA	3.85433e-85	-0.141465	-0.250201
NAPRT	3.96237e-85	0.0394404	1.26665
MRPS36	4.64275e-85	0.142917	0.273737
IL11RA1	5.77999e-85	-0.217364	-1.05936
TIMELESS	5.81376e-85	0.217412	0.47031
SNX2	9.09479e-85	-0.192757	-0.514902
GRSF1	1.11769e-84	-0.209432	-0.451387
ELOVL1	1.12151e-84	-0.219246	-0.960131
TRIM2	1.36941e-84	0.174219	0.540109
ANXA2	1.51258e-84	-0.279215	-1.18285
COL3A1	1.94121e-84	-1.16473	-5.56296
HSD17B10	1.9921e-84	-0.151188	-0.24951
RXRG	2.09741e-84	0.0437605	1.24806
FRMD4B	2.28287e-84	-0.259683	-1.47308
SNTA1	2.29093e-84	0.0359867	1.30297
FAM169B	2.8345e-84	0.0209056	1.60255
TNS1	2.93702e-84	-0.281222	-2.37512
FZD3	3.0118e-84	-0.216939	-0.661529
TGS1	3.24537e-84	-0.160091	-0.300233
BTF3L4	3.76476e-84	-0.149534	-0.261504
MAN1A	3.85655e-84	-0.332784	-2.89019
MYCL	3.94767e-84	-0.182298	-0.817021
PAX9	4.6446e-84	-0.655769	-4.16085
PCED1B	4.90217e-84	0.034088	1.31381
SOS2	5.58978e-84	-0.21005	-1.23963
CAMKK2	7.76196e-84	-0.206517	-1.02164
PHLDA3	9.29379e-84	0.14232	0.604413
CPXM1	9.3059e-84	-0.207232	-0.856845
PAX5	1.06435e-83	-0.409088	-2.49749
KHDRBS3	1.26309e-83	-0.189764	-0.406666
EMC4	1.27997e-83	-0.17263	-0.412782
GM26641	1.3331e-83	0.012703	1.9209
MIR124-2HG	1.63708e-83	-0.0189269	-0.258005
NCL	1.65304e-83	0.159936	0.204334
SRPRB	1.66087e-83	-0.181546	-0.464134
SCCPDH	1.68632e-83	-0.219977	-0.681567
EID2	2.0203e-83	-0.18528	-0.462552
CDC16	2.24595e-83	-0.164418	-0.358679
JPH3	2.25779e-83	0.0259117	1.3935
FOXN2	2.68935e-83	-0.208261	-1.07057
HEY2	2.73901e-83	-0.313589	-2.8198
CORO2B	3.07052e-83	0.0511738	1.05551
ATOH8	3.1125e-83	-0.227838	-1.87534
TXNDC15	3.6924e-83	-0.190588	-0.557625
RPS25	4.2141e-83	0.0823012	0.1159
GM9493	4.72474e-83	-0.140794	-0.225366
TVP23B	5.18979e-83	-0.188628	-0.523059
PFDN6	5.45389e-83	0.135744	0.237406
FDX1	5.56689e-83	0.149656	0.649105
PTH1R	7.0972e-83	-0.0804193	-0.372812
SRP72	7.60465e-83	-0.152866	-0.294574
CLN5	1.00409e-82	-0.199789	-1.01169
LHFPL2	1.0104e-82	-0.23242	-1.44011
NLGN2	1.03596e-82	0.10417	0.801857
LPGAT1	1.06815e-82	-0.22719	-1.00714
HMCN1	1.12603e-82	-0.165453	-0.789888
GATA4	1.4032e-82	-0.369314	-2.48592
LIFR	1.45297e-82	-0.247615	-1.38543
PLEKHJ1	1.63333e-82	-0.142648	-0.269241
SEMA3A	1.72054e-82	-0.29027	-2.07434
GATA5	1.72501e-82	-0.568566	-3.36109
NUBP1	1.77623e-82	-0.167245	-0.383646
HACD1	2.16259e-82	-0.181479	-0.402585
SLC35A1	2.28542e-82	-0.174235	-0.419409
DSG2	2.42889e-82	0.0535016	0.293538
CNOT6	3.0657e-82	-0.182663	-0.435203
MED21	3.39471e-82	-0.159305	-0.309352
FGF15	3.52705e-82	0.0755822	0.332416
TEX30	3.79264e-82	-0.171263	-0.408073
PNP	3.85002e-82	0.239351	0.422197
TLN2	4.27088e-82	-0.219242	-0.549548
MAP7D2	5.56636e-82	0.130189	0.641841
HP1BP3	6.77539e-82	-0.203138	-0.568884
GM26669	7.26783e-82	-0.226012	-1.40948
FRZB	7.5456e-82	-0.235856	-1.1426
TCEAL8	9.59275e-82	-0.15292	-0.253738
NES	1.21734e-81	-0.159629	-0.479303
CDH10	1.25403e-81	0.036621	1.26091
XIST	1.46057e-81	0.201748	0.755365
DNAJC25	1.7198e-81	-0.197422	-0.693375
CELF2	1.86308e-81	-0.177198	-0.581282
ASPH	2.31293e-81	-0.199877	-0.517336
TMEM119	2.50219e-81	-0.268582	-2.34639
BTG1	2.7428e-81	-0.220769	-0.603133
DUSP12	2.78919e-81	-0.177026	-0.470721
FLI1	2.96328e-81	-0.682681	-3.63153
RPL36AL	3.08429e-81	0.099267	0.150083
MGEA5	3.14494e-81	0.222611	0.430564
MCM5	3.40478e-81	0.176653	0.324612
HS6ST2	3.98363e-81	-0.230897	-0.839735
CYP4X1	4.77759e-81	0.127323	0.792447
COPE	5.93754e-81	-0.161728	-0.311071
EIF5	6.97269e-81	-0.111165	-0.168869
ECHS1	8.51187e-81	0.168034	0.342374
GLDC	9.41911e-81	0.0968286	0.196142
CXADR	9.44888e-81	0.242332	0.525197
DNAJB14	9.53243e-81	-0.203664	-0.921392
X1700123O20RIK	1.03363e-80	-0.155121
TIPRL	1.84346e-80	-0.162003	-0.363187
TMEM108	2.16585e-80	-0.111355	-0.458706
UBE2E2	2.33921e-80	-0.197333	-0.75282
VEGFA	2.64318e-80	-0.227628	-0.905217
LAMC1	2.86705e-80	-0.212161	-0.723635
MBNL1	3.05803e-80	-0.205269	-0.955253
E130012A19RIK	3.08181e-80	-0.166396	-0.332496
OGFRL1	3.4982e-80	0.157275	0.650933
MEF2A	3.51627e-80	-0.218635	-0.761957
STK10	3.70737e-80	0.0380728	1.18913
HPN	4.73784e-80	0.0352845	0.95695
PLXNB1	4.94534e-80	0.117378	0.738369
ZIC1	5.28469e-80	-0.944827	-4.92257
SLC25A36	6.2231e-80	-0.20528	-0.65366
CPA2	6.88952e-80	-0.312419	-2.46637
HNRNPF	7.15424e-80	-0.132272	-0.222975
IMPA2	7.30971e-80	0.128303	0.69227
HDAC1	7.77128e-80	0.176397	0.335846
GM8186	9.23888e-80	0.16089	0.308871
GRB14	9.32885e-80	0.0493963	1.01739
MYB	9.62281e-80	0.0395456	1.27287
HACD4	1.00693e-79	-0.265949	-2.36432
EIF4EBP1	1.03059e-79	-0.162606	-0.249424
LMAN2	1.28541e-79	-0.164702	-0.338996
ZBTB8A	1.35552e-79	0.0662286	0.925246
LMO2	1.40034e-79	-0.453516	-2.46448
CPE	1.67372e-79	0.158499	0.510477
TSPAN7	1.70985e-79	-0.172555	-0.466333
HS3ST3A1	1.82199e-79	-0.353864	-3.64395
SNX1	1.93598e-79	-0.188077	-0.56768
PARM1	2.89852e-79	-0.329769	-2.61427
FGF3	2.98459e-79	-0.336042	-2.15829
LGALS1	3.00788e-79	0.262602	0.46747
SCARF2	3.3922e-79	-0.34032	-3.22876
CLINT1	3.54882e-79	-0.162961	-0.313254
MYO5B	4.14004e-79	-0.362831	-2.98132
AGPAT5	4.29792e-79	-0.168618	-0.355756
FABP5	4.3862e-79	0.322579	0.274291
ACAT1	4.49036e-79	-0.194462	-0.894572
IGSF21	4.99692e-79	0.0471618	1.00138
CAP1	5.06605e-79	-0.16693	-0.395399
LARGE2	5.09578e-79	0.0898066	0.623044
MRPL50	6.35556e-79	-0.159984	-0.350078
CLCN5	6.80881e-79	-0.216098	-0.594978
SULF2	7.65425e-79	-0.2069	-0.651212
SNX30	8.00782e-79	-0.205361	-0.903964
SEMA3C	8.33312e-79	-0.321613	-2.70298
IGDCC4	8.51634e-79	0.0364356	1.30571
CDCA7L	1.06949e-78	0.221173	0.480271
DKK1	1.14211e-78	-0.373844	-1.43053
FAM3C	1.17734e-78	-0.18958	-0.564822
CCNY	1.23817e-78	-0.188072	-0.55442
GIPC1	1.54459e-78	-0.174004	-0.432718
RAP2C	1.80832e-78	-0.195947	-0.62813
NABP2	1.90446e-78	0.178346	0.357359
WDR1	2.15459e-78	-0.202959	-0.589873
MT1	2.19372e-78	0.148329	0.314082
HIGD1A	2.44453e-78	-0.151622	-0.212313
CHMP4C	2.58115e-78	0.0366435	1.14528
ETFA	2.87046e-78	0.203965	0.516137
S1PR2	3.27048e-78	-0.197413	-0.987167
SERTAD4	4.26103e-78	-0.354963	-3.30946
LYN	4.64934e-78	-0.286104	-2.56517
SYT1	5.35192e-78	0.0169855	1.75497
STAP2	5.44946e-78	0.074385	0.876284
GNL1	5.51757e-78	-0.172977	-0.460359
GPC6	7.11534e-78	-0.192627	-0.486481
BAG2	8.1332e-78	-0.192149	-0.50215
MAP2K2	8.67741e-78	-0.132899	-0.221462
LAMP1	9.87093e-78	-0.152977	-0.25729
GPX8	1.13226e-77	-0.179717	-0.584391
IFI27L2A	1.1595e-77	0.0377934	1.24215
SAMD1	1.33669e-77	-0.18257	-0.458894
MIP	1.34886e-77	0.0304278	1.2524
SMIM1	1.52206e-77	0.0846191	0.433209
RAB6B	1.53002e-77	0.0599292	0.922732
PCDH19	1.5461e-77	-0.44953	-2.4031
SNAI1	1.73216e-77	-0.205537	-1.14814
ETV4	1.84857e-77	-0.269095	-2.0431
CELF3	1.88434e-77	0.015051	1.77716
HS2ST1	1.96869e-77	-0.182369	-0.483688
RHBDL3	2.06842e-77	0.0190979	1.60848
GM10837	2.12008e-77	0.163384	0.618284
MSI1	2.21424e-77	0.25039	0.479169
AKR7A5	2.21691e-77	-0.164653	-0.345835
EMG1	2.24419e-77	-0.13368	-0.204028
NPTX1	2.26632e-77	0.0128199	1.93472
KIF5A	2.67189e-77	0.0574928	0.966689
X5330434G04RIK	2.73453e-77	0.0829397
RPN2	2.89499e-77	-0.149517	-0.257062
MAP2	2.99526e-77	0.0536615	0.642678
APOOL	3.12189e-77	-0.170759	-0.473371
GRIN2B	3.22653e-77	0.0134992	1.9743
HSP90B1	3.40496e-77	-0.145894	-0.198058
RSPO3	3.54025e-77	-0.178325	-1.25742
AKT2	4.59344e-77	-0.192931	-0.70089
ARHGEF26	4.79167e-77	-0.21509	-1.14417
GSTA4	5.06845e-77	0.249437	0.4074
CPED1	6.3637e-77	-0.355337	-2.64443
MB21D2	7.65242e-77	-0.193096	-1.16699
HIST1H2AE	7.72097e-77	0.395659	0.630652
VSTM2L	8.00304e-77	0.0243781	1.4195
FAM172A	8.71743e-77	-0.199911	-0.880594
LYRM9	1.01776e-76	-0.192321	-0.956129
SIN3B	1.1339e-76	-0.160507	-0.368199
SERINC1	1.17242e-76	-0.186734	-0.501754
AXIN2	1.17729e-76	-0.243916	-0.761679
TMED3	1.34887e-76	-0.187639	-0.560199
PRDX4	1.46003e-76	-0.13889	-0.196107
SDK2	1.68282e-76	-0.213121	-1.41926
PFN1	2.03314e-76	-0.1299	-0.210286
X2210013O21RIK	2.65053e-76	-0.170046
HLTF	2.92985e-76	0.168246	0.572449
TRAF3IP1	3.59039e-76	0.137487	0.635856
MKRN3	3.9574e-76	-0.211435	-1.43174
BEND3	4.55337e-76	0.123237	0.672379
BMP7	5.24863e-76	-0.204953	-0.882218
DLX5	5.27709e-76	0.0455438	0.797996
FAIM	5.98253e-76	-0.17643	-0.466954
PKM	6.03997e-76	0.108211	0.147562
BEX4	6.74968e-76	0.291968	0.414247
RBMS3	7.16911e-76	-0.230416	-1.498
LPAR3	7.73643e-76	-0.277022	-2.54351
PCDH8	7.99945e-76	-0.396318	-2.5235
ARL2BP	8.75877e-76	-0.162518	-0.370015
IL17RA	9.49006e-76	0.0445642	1.1955
SNX18	9.5396e-76	-0.191081	-0.612607
LEPROTL1	9.55402e-76	-0.168296	-0.416891
TRP53BP1	1.07782e-75	0.221555	0.430235
HBA-X	1.12814e-75		-25.579
CDX1	1.25502e-75	-0.315202	-1.78231
WIPF3	1.2925e-75	0.0587062	0.778679
ZFP362	1.30555e-75	-0.205441	-0.876105
WNT4	1.36387e-75	0.0391191	0.270905
ARMCX6	1.43859e-75	0.0880563	0.77495
GM973	1.74077e-75	0.0111273	2.13101
ARHGEF28	1.75609e-75	0.0348489	1.01836
GATA3	1.84933e-75	-0.351508	-2.4744
TGFBI	2.04061e-75	-0.272461	-2.25722
PRR5	2.13219e-75	-0.200498	-0.990538
NID1	2.45181e-75	-0.28207	-2.24235
SLC35A4	2.57608e-75	-0.175855	-0.512435
MORF4L1	2.86663e-75	0.111376	0.171419
X9430020K01RIK	2.92972e-75	-0.222137
ACTR3B	3.26006e-75	0.051957	1.0199
SULT4A1	3.27636e-75	0.0768557	0.821236
HSPA13	3.27987e-75	-0.187793	-0.609158
FREM2	3.97654e-75	0.0902367	0.424807
SMAD2	4.06323e-75	-0.184435	-0.541815
ULK2	4.18008e-75	-0.197385	-1.45853
LLPH	4.33721e-75	-0.132422	-0.199277
IMPAD1	4.34647e-75	-0.182728	-0.417235
VDAC1	4.68351e-75	-0.119169	-0.211537
SAR1B	5.09712e-75	-0.150891	-0.310392
DAAM1	5.68095e-75	-0.21108	-0.720161
TMTC4	5.74376e-75	-0.195283	-1.04499
LSM12	6.15962e-75	0.129171	0.24223
THSD7A	6.73286e-75	0.048729	0.98198
CACNB3	7.17863e-75	0.110054	0.671069
DYNLT1F	7.19973e-75	-0.175179	-0.439057
LRRC58	7.47299e-75	-0.154459	-0.302066
RORC	7.74777e-75	0.017517	1.67795
TSACC	7.93855e-75	0.0885347	0.787289
H2-DMA	8.07674e-75	0.0223656	1.50652
TUBA1B	8.18061e-75	-0.114964	-0.191784
APITD1	8.28399e-75	0.211489	0.418699
ATP2C1	8.83679e-75	-0.193142	-0.611977
CMPK1	8.91888e-75	-0.150324	-0.289341
HRH3	9.21874e-75	0.00736556	2.25521
TRAM2	1.06913e-74	-0.19784	-1.4734
UACA	1.18952e-74	-0.237823	-0.66226
EPB41	1.21651e-74	0.230058	0.430491
SCPEP1	1.24793e-74	-0.199451	-0.748154
NFKB1	1.35277e-74	-0.19755	-0.878786
CPLX3	1.49695e-74	0.00525129	2.75652
HMG20B	1.66252e-74	-0.166024	-0.346105
MAPKAPK3	1.736e-74	0.0207191	1.55005
RIN3	1.96143e-74	-0.25385	-2.30235
HNRNPU	2.03536e-74	0.137089	0.184812
UBE2J2	2.06475e-74	-0.146961	-0.29731
KCTD12B	2.15997e-74	-0.240917	-1.39082
ANK3	2.32936e-74	-0.218459	-0.72892
POLDIP2	2.47341e-74	-0.17109	-0.461305
SRRM3	2.66862e-74	0.0131761	1.90733
IKBIP	2.67515e-74	-0.190928	-0.803116
LSP1	3.10035e-74	-0.226493	-1.85592
SKAP2	3.11643e-74	-0.19796	-0.790035
TOR1AIP1	3.416e-74	-0.188877	-0.651697
TMCC1	3.76799e-74	-0.199342	-0.68887
SMYD2	4.24761e-74	-0.185779	-0.566371
ZFP948	4.55218e-74	-0.193981	-1.26572
RPL32	4.8986e-74	0.0637729	0.0885549
SDF4	5.57546e-74	-0.152881	-0.322988
ANXA4	5.64692e-74	0.050758	0.778006
SORBS2	6.01355e-74	-0.221731	-1.30003
SOCS6	8.61121e-74	-0.186413	-0.519746
RAB11FIP1	9.08684e-74	-0.202857	-0.774745
CXXC5	9.61448e-74	-0.202777	-0.574775
HAPLN3	1.09227e-73	-0.218651	-1.5674
NOG	1.11982e-73	-0.334832	-2.43335
RAB6A	1.1677e-73	-0.168147	-0.393476
ITM2A	1.2997e-73	-0.170974	-0.494729
CDK14	1.47277e-73	-0.199162	-0.773016
MPRIP	1.82548e-73	-0.164448	-0.355075
PHC2	2.04036e-73	-0.172348	-0.417973
SLC43A1	2.12918e-73	-0.187676	-0.958579
ATOX1	3.3389e-73	0.131108	0.245206
VAT1L	4.13669e-73	0.0452103	1.04278
CBLN1	4.53683e-73	0.0556669	0.591864
KRT19	4.54991e-73	-0.404696	-2.21009
EIF3E	4.65037e-73	-0.112043	-0.182952
BCAM	5.04693e-73	0.0616987	0.112221
DDX50	6.41195e-73	-0.167295	-0.425889
NAV1	6.76077e-73	-0.175837	-0.510581
SUPT5	6.88993e-73	0.171705	0.341895
GRIK3	7.37335e-73	0.0394048	1.11108
SEC11C	7.55188e-73	-0.180859	-0.648319
DBI	8.17179e-73	-0.135924	-0.197267
UBL5	9.38935e-73	0.112121	0.194012
WNT5B	9.77886e-73	-0.209456	-1.42521
S1PR3	1.10691e-72	-0.444187	-3.62773
PLCE1	1.11274e-72	0.0972366	0.73562
RPL11	1.17574e-72	0.0749095	0.106612
TMEM158	1.28816e-72	-0.210525	-0.887051
MSX2	1.37918e-72	-0.282799	-1.50799
KCTD6	1.67888e-72	-0.184788	-1.03542
EMP2	1.96175e-72	-0.2823	-2.19746
HBB-Y	2.23789e-72		-25.399
DACT1	2.38117e-72	-0.225967	-1.25927
CDKL1	2.48138e-72	-0.322152	-3.02114
TMEM41B	2.57924e-72	-0.180933	-0.599572
PLK4	2.69185e-72	0.261503	0.475731
GPBP1	2.72382e-72	-0.158939	-0.300929
IGSF11	3.06886e-72	-0.290395	-2.79026
RYK	3.08674e-72	-0.159383	-0.321451
SEZ6L2	3.41573e-72	0.0276974	1.40046
TUNAR	3.53206e-72	0.0540367	0.970208
SIGMAR1	3.71627e-72	-0.160034	-0.312999
PGRMC1	3.89515e-72	-0.157532	-0.273259
GCHFR	4.33353e-72	-0.186929	-0.800964
GLI3	6.60658e-72	-0.16253	-0.419815
ZFP219	7.63773e-72	0.210759	0.47072
KLHL6	8.67602e-72	-0.551153	-3.98526
ZNHIT1	8.96086e-72	0.190093	0.401901
BOC	1.007e-71	-0.212021	-1.40714
KDELC2	1.05532e-71	-0.187786	-0.954274
SYCP3	1.32523e-71	0.0224521	1.54417
MOB1A	1.52212e-71	-0.187426	-0.601773
PSME1	1.66955e-71	0.185296	0.388062
YPEL3	1.72814e-71	0.159392	0.60032
FXYD6	1.76913e-71	0.254665	0.467343
NDEL1	1.77669e-71	-0.189997	-0.761783
TOP1	1.78319e-71	0.116816	0.18075
NKIRAS2	1.9873e-71	-0.180703	-0.662689
CYP51	2.00255e-71	-0.205739	-0.643256
CSNK1E	2.33098e-71	-0.15583	-0.291872
FLT1	2.35121e-71	-0.406859	-2.41083
CUL1	2.58909e-71	-0.141374	-0.246673
X1010001N08RIK	2.64101e-71	-0.50979
PDLIM1	2.73218e-71	0.0540875	0.0844095
DAD1	2.80613e-71	-0.128986	-0.17997
SENP5	3.3515e-71	-0.187695	-0.739657
PLEKHA5	4.27324e-71	0.206619	0.482242
NSMCE1	4.45598e-71	-0.152842	-0.319762
VSX1	5.06227e-71	0.00726678	2.32367
REL	5.29051e-71	-0.215341	-1.90621
MAPK1IP1L	5.59028e-71	-0.168284	-0.355682
NEFM	5.6574e-71	0.0553097	0.399754
APH1A	7.2832e-71	-0.178518	-0.522588
REEP2	7.6089e-71	0.0562116	0.9429
LPL	7.98674e-71	0.13766	0.623145
SAR1A	8.76482e-71	-0.147437	-0.30293
PCDH17	8.76482e-71	-0.386755	-3.22926
NFIB	9.21345e-71	0.0408612	1.09883
DLGAP4	9.60993e-71	-0.177808	-0.485523
DTNB	1.02858e-70	0.138647	0.586668
D630045J12RIK	1.04274e-70	-0.182114	-1.29108
LRRC59	1.10441e-70	-0.138339	-0.247195
NGFR	1.36691e-70	-0.476656	-3.84232
TNFAIP6	1.404e-70	-0.465658	-3.99908
ARHGEF12	1.4185e-70	-0.19677	-0.650191
HSD17B11	1.46868e-70	0.0535617	0.729377
ZCCHC24	1.53555e-70	-0.19422	-1.43968
MIR17HG	1.58874e-70	-0.170293	-0.409947
RAX	1.6529e-70	0.0762283	0.614478
NNAT	1.76049e-70	-0.186351	-0.304161
BAG1	1.87868e-70	-0.124996	-0.218019
GSTK1	1.97971e-70	0.0490595	1.02521
PDZPH1	2.02144e-70	0.0598223	0.475206
USP47	2.07004e-70	-0.184947	-0.503956
ZMIZ1	2.24414e-70	-0.185093	-0.466211
SH2B3	2.38331e-70	-0.202739	-1.64122
TWIST2	2.4473e-70	-0.370505	-3.32645
YES1	2.58707e-70	-0.194469	-0.697598
EPHA1	2.87678e-70	0.0514437	0.638664
RPP21	3.01659e-70	0.189085	0.39665
OARD1	3.22172e-70	0.155866	0.317966
SLC9A3R1	3.37964e-70	0.28847	0.440545
DOK5	3.84706e-70	-0.229764	-2.01848
X1190002N15RIK	4.54672e-70	-0.189176
CHST3	4.75784e-70	0.0337982	1.22925
DLL1	5.12323e-70	-0.312433	-1.92334
TRP73	6.04174e-70	0.00345002	2.94426
FAR2	6.10639e-70	0.0100273	2.08562
P3H4	6.65858e-70	-0.180584	-0.80736
VDAC3	6.99467e-70	-0.129375	-0.224108
TSPAN33	7.56999e-70	0.0737657	0.810599
MOB4	7.65915e-70	-0.142878	-0.276859
DIXDC1	7.7226e-70	-0.199031	-1.46633
SOX5	7.74982e-70	-0.210334	-1.25919
RBM24	1.10566e-69	-0.0503631	-0.432064
RSL1D1	1.13731e-69	-0.133431	-0.207587
RAP1GDS1	1.21591e-69	-0.18857	-0.662523
COL27A1	1.21754e-69	-0.197237	-1.40672
NDUFA6	1.33402e-69	0.131376	0.253649
VAPB	1.6143e-69	-0.14842	-0.315814
GGNBP2	1.71304e-69	-0.162814	-0.398195
GM26767	1.76206e-69	0.187957	0.712283
STRBP	1.79412e-69	0.186656	0.350201
HRK	1.80385e-69	0.0168219	1.62111
PRMT7	2.40015e-69	-0.148525	-0.335853
PTPN9	2.45174e-69	-0.187203	-0.723176
MAFG	2.45928e-69	-0.170794	-0.444046
NDUFA2	2.51344e-69	0.112771	0.203978
VPS26A	2.7163e-69	-0.179219	-0.569018
LHX2	2.77926e-69	-0.106825	-0.819231
GOLIM4	3.23727e-69	-0.184874	-0.480066
PTMS	3.29308e-69	0.176758	0.308383
TNNC1	3.41521e-69	-0.571105	-2.97748
IKZF5	3.89739e-69	-0.184298	-0.788888
EN2	5.27503e-69	-0.687723	-4.10381
RNF7	5.36977e-69	-0.117277	-0.17139
RPL13-PS3	5.72106e-69	-0.135352	-0.22621
HELB	6.40538e-69	0.103738	0.700166
ZFHX3	6.41113e-69	-0.213721	-0.660919
POFUT2	6.48019e-69	-0.173877	-0.501044
ZBTB16	6.59492e-69	-0.145465	-0.722083
IRS1	6.95777e-69	-0.201526	-1.51219
LUZP1	7.11127e-69	-0.153073	-0.30087
ACSL3	8.18992e-69	-0.185691	-0.457141
RARA	8.57249e-69	-0.182588	-0.796981
ERBB2	9.14578e-69	-0.186596	-1.03626
COL4A5	9.23399e-69	-0.191142	-1.37702
HBEGF	9.38431e-69	-0.19514	-1.40992
BAZ2B	9.39565e-69	-0.193777	-0.496333
RPL19	9.60295e-69	0.0608939	0.0853681
EEF1E1	9.63028e-69	-0.154208	-0.302206
P3H1	9.78269e-69	-0.179866	-0.922601
TSPAN5	1.00024e-68	0.203751	0.486561
PRRC2B	1.03259e-68	-0.171046	-0.420459
ADAM12	1.15952e-68	-0.5552	-4.9769
G2E3	1.35338e-68	0.230085	0.440471
SPP1	1.57837e-68	0.00572433	2.27117
RAC1	1.62256e-68	-0.124071	-0.218106
RRAGC	1.64138e-68	-0.180319	-0.680033
PATJ	1.67737e-68	0.0613932	0.59967
PRRX1	1.68017e-68	-0.0149825	-0.252752
ATF7IP	1.68939e-68	0.210017	0.437075
CTDSPL	1.71407e-68	-0.17979	-0.61132
SYNGR2	1.91989e-68	-0.193386	-0.673962
DTNBP1	2.31384e-68	-0.166408	-0.456356
SVBP	2.42497e-68	-0.145894	-0.294752
NACAD	2.52028e-68	0.00820463	2.18268
[truncated: 11,631 more rows]

## Sheet: PhenoGraph cluster 1
gene	P-value (FDR adjusted)	MAST Hurdle	logFC
SOX11	0	1.66156	1.16355
MEST	0	1.58882	1.56845
IGFBP2	0	1.36776	2.17907
CRABP2	0	1.22139	1.72739
SFRP1	0	1.13332	1.37976
SOX2	0	0.992478	2.63793
CDH2	0	0.87295	1.81343
TLE4	0	0.834047	2.01059
GJA1	0	0.797509	1.19011
TMEM47	0	0.790798	1.50449
PLS3	0	0.729148	1.46524
TCF7L2	0	0.717064	1.82154
KIF21A	0	0.678857	1.65847
GM1673	0	0.673883	1.01868
OTX2	0	0.660733	2.97548
ZFP36L1	0	0.659721	1.03359
SALL2	0	0.655104	2.21921
SERF1	0	0.654409	1.12601
STOX2	0	0.650769	1.73619
PALLD	0	0.643153	1.64976
SLC2A1	0	0.61551	0.943341
PCSK1N	0	0.613749	2.44707
HES1	0	0.607332	1.53687
LIN28B	0	0.596638	1.12829
TOX3	0	0.550115	2.18687
H2-K1	0	0.548503	1.66583
HMGN3	0	0.541913	1.07094
NDN	0	0.540798	0.964122
SOX3	0	0.539833	1.84953
CTNNBIP1	0	0.533203	0.962101
PHLDA1	0	0.531405	1.28218
KHDRBS3	0	0.527522	1.01164
QK	0	0.522709	0.869164
POU3F1	0	0.522603	1.50573
JAM3	0	0.520989	1.03702
IDI1	0	0.506246	1.31745
IPO5	0	0.504212	0.881857
NAV1	0	0.49609	1.4407
ZFP462	0	0.489746	0.956738
HDAC6	0	0.487944	1.93395
UCHL1	0	0.484811	1.92388
RPA3	0	0.4818	0.812021
GLI3	0	0.474079	1.14304
GKAP1	0	0.468489	0.942565
SFRP2	0	0.465752	1.33602
MIR17HG	0	0.463666	1.1034
PFN2	0	0.457787	1.08732
SCD2	0	0.45663	0.817456
PLEKHA1	0	0.456249	1.3313
RNF165	0	0.438412	1.66203
CELF2	0	0.43394	1.64957
ZFP266	0	0.432155	0.755837
SHISA2	0	0.424269	2.4767
MAGEH1	0	0.423192	0.976096
ZFP422	0	0.421454	0.813035
NR1H5	0	0.416691	1.07668
ZFP503	0	0.414335	1.68869
IGF2BP2	0	0.411304	0.716991
FABP5	0	0.402831	0.576569
CD47	0	0.398935	1.51236
GM2694	0	0.390065	1.60924
TNFAIP8	0	0.388809	1.06402
DNAJC24	0	0.37981	0.828354
TSPAN5	0	0.375473	1.05897
PSIP1	0	0.374147	0.591735
ALYREF	0	0.373032	0.638225
SNHG11	0	0.365075	1.24406
INA	0	0.358887	1.87857
TUBB3	0	0.357091	1.91652
ILDR2	0	0.354211	1.37697
SALL3	0	0.348468	1.95131
SOX21	0	0.344138	1.79349
ERAS	0	0.342535	2.38311
SRSF9	0	0.34143	0.568742
ELP4	0	0.339257	0.897656
SEPT3	0	0.337028	1.5204
CPE	0	0.335625	1.58921
IMMP1L	0	0.334211	0.65698
SNX10	0	0.33182	1.14533
LMO1	0	0.326344	1.81152
LIX1	0	0.323704	1.72458
SYT11	0	0.323458	2.35688
SIX3	0	0.320756	5.01188
GLDC	0	0.316897	1.86127
SOX1	0	0.309958	1.66556
MAPK12	0	0.304921	1.54492
X6330403K07RIK	0	0.304104
SNRPF	0	0.301318	0.473435
ARGLU1	0	0.300795	0.49381
IFT57	0	0.299664	1.26997
PLCB4	0	0.293671	1.50625
H2-D1	0	0.292282	1.20503
HPF1	0	0.289559	0.530354
EPHA7	0	0.281326	2.29784
SF3B6	0	0.275593	0.472706
MARCH9	0	0.27371	1.42459
NRXN2	0	0.264177	1.38397
RRAGB	0	0.263547	1.72091
H3F3A	0	0.262621	0.395023
HOPX	0	0.262384	2.38546
IRS4	0	0.259345	4.02698
SPON1	0	0.258969	2.13506
EHBP1	0	0.250155	2.19364
ZBTB16	0	0.249805	1.76124
CENPV	0	0.248031	1.60586
HNRNPA1	0	0.244948	0.371374
SP8	0	0.241935	1.63528
PEG12	0	0.236463	1.94603
MGST1	0	0.231766	1.43592
FOXD1	0	0.230518	2.27307
PAX6	0	0.229072	4.39485
DKK1	0	0.219318	2.04409
HSPA4L	0	0.211971	1.67828
NAP1L1	0	0.211036	0.320213
PTPRZ1	0	0.210292	2.67138
MIR124-2HG	0	0.198031	2.47275
HESX1	0	0.195309	3.23936
GRTP1	0	0.19442	1.55558
NUAK2	0	0.192977	1.52938
DUSP5	0	0.188877	1.51669
MAF	0	0.18247	2.08084
SCD1	0	0.171054	1.71429
LHX5	0	0.16822	3.17224
RPRM	0	0.166686	1.91126
APBA2	0	0.166071	2.03073
ALPL	0	0.160842	1.65151
TAL2	0	0.159416	2.05298
SCUBE1	0	0.158593	2.52306
CNTNAP2	0	0.157261	2.10616
SLMO1	0	0.157035	1.42675
FZD8	0	0.153217	2.11372
SCG5	0	0.152407	2.09505
FZD5	0	0.152345	2.87959
SORBS2	0	0.152161	1.81623
C1QL1	0	0.151499	1.77296
LHX2	0	0.148998	5.08091
TDRKH	0	0.147074	1.5261
X5330434G04RIK	0	0.143586
SOX5	0	0.143236	1.64631
WSCD1	0	0.13658	1.76894
NECAB2	0	0.136211	1.57871
FOXD4	0	0.13448	1.94036
ADGRL3	0	0.132566	1.71396
PAK3	0	0.130717	2.77804
OTX1	0	0.126732	3.32246
PDZPH1	0	0.120702	1.86518
CCDC177	0	0.118159	1.79651
NRG1	0	0.110581	2.30299
WNT5B	0	0.110386	2.4682
MKRN3	0	0.107215	1.82342
NRCAM	0	0.105376	2.52039
MIAT	0	0.102307	2.72651
X2510009E07RIK	0	0.094198
AMER2	0	0.0935994	1.79576
RAX	0	0.0874177	5.01861
SRCIN1	0	0.0819146	2.68072
NEFH	0	0.0718569	2.36702
DMRTA2	0	0.0677955	2.65595
ERMN	0	0.0639971	2.43916
FEZF1	0	0.0637373	4.82514
LRRTM3	0	0.0625489	2.28173
SCUBE2	0	0.0623008	3.55664
A730017C20RIK	0	0.0611791	2.7004
MAOB	0	0.0594486	2.26789
LMO3	0	0.0522425	3.01697
EDN1	0	0.0508761	3.17237
MPPED1	0	0.047299	2.28
PEX5L	0	0.0416986	3.10322
EMX2	0	0.0381	4.59932
SHTN1	0	0.0372504	2.9641
DMRT3	0	0.0360002	3.07217
FEZF2	0	0.0329584	4.23751
CDH20	0	0.0327478	2.6498
FOXG1	0	0.0286077	4.1636
GM3453	0	0.0266414	2.69522
WNT8B	0	0.0261621	4.31931
SIX6	0	0.0173715	4.97337
WNT7B	0	0.0150449	3.64464
GM45009	0	0.0108929	4.32842
ARX	0	0.0101926	5.51804
NKX2-1	0	0.00972817	4.72132
NR2E1	0	0.00306658	6.38175
COX8A	0	-0.245332	-0.36157
ATP5C1	0	-0.254335	-0.397197
TBCA	0	-0.266303	-0.413713
ATP5B	0	-0.280344	-0.436461
ATP5A1	0	-0.293682	-0.461467
ACTG1	0	-0.316833	-0.460525
TMEM256	0	-0.320474	-0.608686
ATP5L	0	-0.342809	-0.544717
PCNT	0	-0.348702	-1.17966
IRX1	0	-0.34877	-1.73316
WLS	0	-0.352837	-1.18995
ATPIF1	0	-0.355923	-0.546714
RDX	0	-0.364113	-0.581913
GALK1	0	-0.371991	-0.713253
HPRT	0	-0.374169	-0.888369
COMMD3	0	-0.399841	-1.14959
PGM2	0	-0.418584	-1.37812
AUTS2	0	-0.424027	-0.98446
ATP5K	0	-0.425692	-0.721361
NDUFA12	0	-0.429859	-0.758768
BEX3	0	-0.438191	-0.661763
BASP1	0	-0.447741	-0.688451
RRBP1	0	-0.449295	-0.780619
NUDT4	0	-0.480664	-1.28792
SERPINH1	0	-0.498421	-0.828268
TAGLN2	0	-0.501982	-1.15112
GPX8	0	-0.504199	-1.98641
RBPMS2	0	-0.536466	-1.76239
SLC9A3R1	0	-0.539524	-1.35886
LMO4	0	-0.55083	-0.966889
COL4A2	0	-0.552242	-1.83441
TNFRSF19	0	-0.553508	-2.09535
COL4A1	0	-0.554084	-1.32234
CALD1	0	-0.593927	-1.04502
GM10076	0	-0.599495	-0.908521
PDLIM1	0	-0.612757	-2.52844
RBMS1	0	-0.617875	-1.38033
PPIC	0	-0.621416	-2.1005
EVA1B	0	-0.667136	-2.09691
FN1	0	-0.671915	-1.32544
VAMP8	0	-0.720967	-2.15576
CGNL1	0	-0.726137	-2.78245
CITED2	0	-0.743926	-1.40951
RBP1	0	-0.772528	-1.90377
SNAI1	0	-0.784325	-3.26815
CD24A	0	-0.793556	-1.51606
COL23A1	0	-0.867162	-3.15618
IGF2	0	-0.874272	-2.2746
GBX2	0	-0.874804	-3.62239
PRRX2	0	-0.890815	-1.97248
IFITM1	0	-0.897463	-1.61563
APOE	0	-0.915399	-1.64308
ZFPM1	0	-0.947991	-3.67169
IRX5	0	-0.974397	-3.80116
VIM	0	-1.00886	-2.47232
CXCL12	0	-1.02414	-4.96127
IRX3	0	-1.02439	-4.06836
TPM1	0	-1.02878	-1.86994
DUSP9	0	-1.03574	-3.01757
CYP26A1	0	-1.05633	-4.08143
PEG3	0	-1.0796	-1.9634
HSPB1	0	-1.09876	-7.33035
FST	0	-1.10032	-2.13259
CRABP1	0	-1.10321	-1.93686
CDH1	0	-1.10866	-4.78186
CNN2	0	-1.11741	-3.1408
PDGFRA	0	-1.13484	-3.97384
FOXC1	0	-1.18901	-5.00532
KRT8	0	-1.19077	-2.60032
RASGRP3	0	-1.24856	-6.41316
APLNR	0	-1.29198	-5.67408
POU5F1	0	-1.32678	-3.68005
FAM212A	0	-1.3547	-4.17286
H19	0	-1.37913	-2.97728
MYL7	0	-1.39091	-4.31171
HAPLN1	0	-1.40236	-4.98202
HOXB2	0	-1.40717	-4.97386
PHLDA2	0	-1.5151	-3.2294
TWIST1	0	-1.54138	-3.31504
FOXC2	0	-1.55797	-6.01517
HOXB1	0	-1.57121	-6.09803
GATA6	0	-1.60601	-6.07202
HOXA1	0	-1.85855	-7.98439
DPYSL4	1.48211e-307	0.0695741	1.97987
GM27032	2.00554e-307	0.0778417	1.98594
FLNA	1.04179e-306	-0.42508	-0.956518
DMRTA1	1.41094e-306	0.0187866	3.2067
EFNB2	4.46516e-306	0.367522	1.25466
SPTBN1	7.93934e-305	-0.473709	-1.0433
NRIP3	1.70057e-304	0.0244723	2.90365
MIP	1.7299e-302	0.0344146	2.45411
BEX4	2.74152e-302	0.580601	0.800862
WHSC1	2.79624e-301	0.407129	0.721682
RTN3	4.34156e-301	0.32553	0.580831
EPCAM	4.9196e-301	-1.03191	-2.47694
TMEM108	6.87391e-301	0.334143	1.33205
TMSB10	7.04766e-301	-0.27551	-0.479204
MSI1	4.50397e-300	0.429764	0.953371
JAKMIP2	5.85391e-299	0.140426	1.51119
BARHL2	9.57669e-299	0.0120073	4.0816
ARG1	1.41232e-298	-1.61014	-6.19387
ODC1	4.11528e-298	0.310044	0.531711
GPRC5C	2.2724e-297	-0.456039	-1.52815
CFC1	7.56373e-297	-1.43634	-6.75157
MECOM	1.32521e-296	0.100354	1.84031
UQCR10	3.01274e-295	-0.244413	-0.378659
PKDCC	6.72586e-295	-0.58705	-1.20204
LRRN1	6.83416e-294	0.0818531	1.76171
TNNI1	9.34083e-294	-1.63905	-6.23698
SAP30	4.27657e-293	0.500686	0.784986
RGMA	8.14495e-293	0.467952	1.07111
TCF15	1.55231e-292	-1.51731	-3.98166
PTPRN2	3.10179e-291	0.038494	2.36386
AU020206	5.36397e-291	0.236683	1.04828
ITM2B	1.55802e-290	-0.382077	-0.937844
FZD3	3.00828e-289	0.345186	1.098
HEBP2	1.35417e-288	-0.412059	-1.95169
MAP1B	1.88461e-288	0.929009	1.00198
UPP1	1.12777e-287	-0.81549	-2.77218
TES	1.46358e-286	-0.476414	-1.52434
RPS29	8.24573e-286	-0.240233	-0.362649
NECTIN2	2.821e-285	-0.464067	-1.10532
GREM1	1.03618e-284	0.0764495	2.22098
TAC1	4.65307e-283	0.0278102	2.80599
ITGB5	2.27964e-282	-0.439379	-1.62491
CLCN3	8.31553e-282	0.378442	0.79966
GLIPR2	1.46778e-281	-0.577066	-2.3378
HN1L	1.71515e-281	0.343023	0.708669
RPL37A	2.07107e-281	-0.1835	-0.274123
PDLIM4	5.58247e-280	-0.632624	-1.88137
X3632451O06RIK	1.69178e-279	0.222704
PLCH1	1.28047e-278	0.192384	1.37431
FABP7	1.02872e-277	-0.714059	-3.57386
HNRNPF	1.3113e-277	0.247757	0.409722
BICD1	1.67517e-277	0.218388	1.27416
RPL37	3.08815e-277	-0.202439	-0.309281
EDARADD	4.46845e-277	0.0299458	2.67685
SPARCL1	6.27189e-277	-1.05146	-4.41963
MTCL1	1.61569e-276	0.316638	1.05009
MTHFD2L	3.28229e-276	0.351981	0.818239
LRPAP1	1.10822e-274	-0.440554	-1.14652
CLDN6	7.65796e-274	-1.44023	-4.39014
H2AFV	1.30886e-273	0.277017	0.415733
ECI1	3.94951e-273	-0.421779	-1.61151
PPP1R9A	1.19592e-272	0.309825	1.08232
GPX4	1.31947e-272	-0.265334	-0.407064
FAM171B	1.35504e-272	0.134562	1.46593
RHOU	3.04696e-272	-0.456044	-1.38345
KIF1A	1.74654e-271	0.101827	1.62423
HIPK2	1.31849e-270	0.364826	0.846711
OAT	1.41833e-270	-0.41448	-1.11274
KLHL13	2.22432e-270	0.20664	1.11583
YWHAQ	3.97684e-270	0.209765	0.341412
NSG1	9.47056e-270	0.169261	1.34457
SLC39A8	9.93938e-270	-0.666605	-2.7744
RPS2	1.71489e-269	0.187302	0.276063
PTH1R	2.79221e-269	-0.521221	-1.83646
MARCKS	3.39787e-269	-0.315684	-0.51156
ZFP219	9.09734e-268	0.344789	0.949758
TBX1	1.55672e-267	-1.22214	-4.28669
ADGRV1	2.4333e-267	0.107756	1.56321
MEOX1	3.3505e-267	-2.21792	-6.99587
SSBP2	1.4144e-263	0.276873	1.02526
NPR3	1.4891e-263	-0.861186	-4.20868
REEP5	1.11845e-262	-0.415479	-1.00161
GATM	8.1361e-262	0.094719	1.60085
S100A11	3.13833e-261	-0.543949	-2.15806
STARD8	3.39501e-261	-0.872234	-3.54274
TCFL5	1.03032e-260	0.331917	1.05348
TFPI	2.59894e-260	-0.650003	-2.60159
AHNAK	5.73957e-260	-1.12082	-4.50127
X2700060E02RIK	1.10346e-259	0.209802
RCSD1	1.96656e-259	-1.06145	-5.37847
ETS1	2.17776e-259	-1.158	-3.77202
EFEMP2	4.21606e-259	-0.426304	-2.11126
AJAP1	3.55577e-258	0.145041	1.49784
MYO10	4.64583e-258	0.484941	0.892013
COL13A1	1.0458e-257	-0.726879	-3.78168
CEP78	8.3745e-257	0.303052	0.810093
EFNB1	2.37559e-255	-0.481241	-1.33141
STMN2	5.10711e-254	0.594816	1.01051
ITGA9	1.28731e-253	-0.625634	-2.84405
ISL1	4.23615e-253	-1.08788	-3.85157
ATP5G1	6.58617e-253	-0.214587	-0.313233
PRR5	1.55938e-252	-0.457398	-2.07718
MMP14	5.09098e-252	-0.421042	-1.50061
RBPMS	6.22655e-252	-0.393538	-0.878072
FBLIM1	1.39051e-250	-0.47596	-2.33164
HMCN1	8.4198e-250	-0.556061	-2.17242
COLEC12	1.49485e-249	-0.508532	-1.43585
DSTN	3.36304e-249	-0.330605	-0.571904
EMILIN1	8.01168e-249	-0.526967	-2.05088
MEG3	7.49589e-248	0.878326	1.00956
GM9844	2.5028e-247	-0.34175	-0.678262
CADPS2	1.136e-246	0.0321882	2.32689
ANXA2	7.97206e-246	-0.687275	-2.49502
TCP11L1	9.42007e-246	0.187035	1.08246
PTN	1.64963e-245	2.03269	1.05349
GNAI2	1.88829e-245	0.279977	0.447358
ACOT7	4.27065e-245	0.243984	1.0334
L1TD1	1.39016e-244	-0.711198	-3.2549
SH3BP5	1.98316e-244	-0.548764	-2.56131
PLAGL2	2.22524e-244	0.289849	0.945915
X9430076C15RIK	7.87516e-244	0.0170009
GADD45G	1.12014e-243	-0.970895	-3.95904
NR2F1	2.69962e-243	0.249883	0.377193
EZR	4.86964e-243	-0.54584	-1.16577
SMIM14	5.11051e-243	0.278514	1.05457
DSP	5.83196e-243	-0.564128	-2.37248
GSTA4	1.30442e-242	0.415219	0.66538
TLN1	1.41525e-242	-0.357341	-0.828398
USP51	2.93459e-242	0.239187	1.16046
LPAR4	3.71222e-242	0.382446	0.967689
ADGRA2	5.60493e-242	-0.816393	-5.55184
PABPC1	1.00369e-240	0.242317	0.398598
SLC38A4	3.99067e-240	-0.415201	-1.47405
DHX32	5.66986e-239	0.215766	1.11763
CLDN7	1.03791e-238	-1.47154	-4.35026
TCEAL8	2.04525e-238	-0.261026	-0.414587
JUP	3.30949e-238	-0.544091	-2.87782
VAX1	3.48893e-238	0.00813687	3.73728
MAP7D2	4.97741e-238	0.19098	1.24023
RNF152	1.1125e-237	0.041521	2.25799
CELSR2	1.61172e-237	0.201098	1.22556
KIF5C	1.56914e-236	0.313978	0.876424
SCLT1	2.31146e-236	0.303888	0.872398
GPD2	7.01712e-234	0.273991	0.938164
SLC24A5	8.71654e-234	0.39836	0.719736
RPL9-PS6	2.58869e-233	0.24789	0.435459
ELOVL4	2.89993e-233	0.124104	1.30977
TAX1BP3	1.14324e-232	-0.393821	-1.27947
CMTM8	4.44504e-232	0.361805	0.97544
COL26A1	7.66308e-231	-0.739871	-2.96766
ECHDC2	1.3851e-230	-0.368583	-1.54746
TENM4	1.46209e-230	0.43816	0.976644
SCN5A	5.28608e-230	0.00507078	3.93672
NDUFB4	1.36367e-229	-0.244816	-0.45549
LLGL2	2.62807e-229	-0.498128	-2.70067
ZFP36L2	5.05807e-229	-0.415417	-1.19943
TFDP1	2.89077e-228	0.29508	0.579786
PAX2	1.02464e-227	0.171543	1.36665
MYB	4.21441e-227	0.0453223	2.02208
RPL36	6.28226e-227	-0.163854	-0.2381
MAP2	8.37728e-227	0.0818334	1.70606
PCDH17	1.63463e-226	0.0437604	2.1068
FUOM	2.39088e-226	-0.589681	-4.07707
ARHGAP29	2.59278e-226	-0.425123	-1.21884
SLITRK5	5.25644e-226	0.0859749	1.5853
ANXA6	3.2332e-225	-0.481327	-2.18653
NAT8L	3.61971e-225	0.0571433	1.7692
SIX1	4.12828e-225	-0.796907	-2.97066
ADGRL2	1.27884e-224	0.452851	0.797896
FUBP1	5.83009e-224	0.222121	0.372183
MCC	8.24754e-224	-0.471623	-2.1141
SNRPN	2.82192e-223	0.384809	0.693623
MSI2	3.09344e-223	0.358986	0.749165
MAPK11	3.62895e-223	0.0801599	1.56537
ZYX	4.56386e-223	-0.356731	-0.975711
CECR2	4.79551e-223	0.369049	0.720126
POLG	6.83229e-223	-0.450034	-1.26287
POLR3K	1.0934e-222	0.283133	0.548043
COX20	1.14824e-222	-0.300276	-0.872078
KDR	1.82181e-222	-1.33195	-4.29865
TMEM38B	3.05209e-222	0.156757	1.19234
RAB25	5.92753e-222	-0.803825	-3.41553
PLA2G16	6.70686e-222	-0.390639	-1.99289
RUFY3	1.01046e-221	0.202277	1.0807
CBX3	1.3222e-221	0.257252	0.402216
QPRT	1.37001e-221	0.178477	1.17921
HSPG2	6.99963e-221	-0.418675	-1.92585
HNRNPK	1.50127e-220	0.180861	0.291414
RCN3	2.9636e-220	-0.348183	-0.967003
LXN	4.93053e-220	-0.428931	-1.84531
MYCN	2.34846e-219	0.434532	0.901225
CALR	3.25268e-219	-0.292305	-0.4398
EPHB1	6.04258e-219	0.199975	1.21861
APOC1	7.39742e-219	-0.60807	-2.93314
E330013P04RIK	2.50178e-218	0.0147687	2.95563
CSNK1E	2.86758e-218	0.303473	0.575799
PCDH7	3.21388e-218	-0.619202	-2.71189
TGIF1	5.15131e-218	0.330228	0.777814
FAM124A	5.23757e-217	0.018431	2.69137
COL5A2	6.46697e-217	-0.525598	-2.34285
CPSF6	1.02512e-216	0.270317	0.518156
TTR	1.19946e-215	-1.85898	-7.29139
DENND1A	3.37371e-215	0.147431	1.09266
RPL36AL	5.96513e-215	-0.162333	-0.23965
WDR76	6.95101e-215	0.33809	0.793705
FAM53B	2.33925e-214	0.172743	1.03413
ADA	2.35419e-214	0.0473965	1.83712
PCOLCE	5.03816e-214	-0.564605	-2.98796
ARMCX1	6.47136e-214	0.306634	0.834705
DAB2	3.06445e-213	-0.551001	-1.53943
ITGB1	4.44304e-213	-0.317057	-0.704543
HAND2	1.56095e-212	-1.58766	-5.8794
CHCHD10	1.8607e-212	-0.520437	-1.61327
PFDN2	7.59625e-212	0.236516	0.416142
RPL28	1.47574e-211	-0.122602	-0.175975
EXOC5	1.70803e-211	0.286639	0.789348
CHD1	1.85577e-211	0.265952	0.486024
ARL4C	1.88757e-211	0.397728	0.977288
ANXA5	2.71839e-211	-0.463017	-1.63309
IRX2	3.87606e-211	-0.544377	-2.21326
KRT18	6.83561e-211	-0.662075	-1.50081
ZFP608	4.70863e-210	0.346269	0.840482
CRIP2	7.9466e-209	-0.521443	-1.33935
VRTN	1.75149e-208	-0.645017	-4.46107
NXPH1	1.84779e-208	0.00328933	4.68422
POLR2L	5.19766e-208	-0.318826	-0.73596
FRMD5	5.64194e-208	0.0796095	1.51385
CSRP1	6.90879e-208	-0.423408	-1.56011
CAMTA1	1.41833e-207	0.309024	0.670487
SHISA4	1.91784e-207	0.224107	0.882067
CERS4	2.60287e-207	0.173579	1.22396
DNAJC9	3.05953e-207	0.257225	0.476073
WNT8A	6.08306e-207	-1.43428	-7.60611
SLAIN1	5.92336e-206	0.0998411	1.39941
TMEM238	8.75943e-206	-0.421733	-2.09273
PDGFRB	2.58702e-205	-0.572925	-2.61851
BOK	4.43538e-205	0.304118	0.936583
PPM1N	8.62849e-205	0.0512395	1.75264
AHI1	1.23843e-204	0.290181	0.813446
TSHZ1	1.26284e-204	-0.513608	-2.15983
DACT1	2.42186e-204	-0.483952	-2.24183
EFNA5	2.49573e-204	0.32219	0.931233
TCEA3	1.54995e-203	-0.466942	-2.67328
PRR7	1.96713e-203	0.301813	0.897473
ZFHX4	3.36184e-203	0.177313	1.29656
MRPL34	4.14704e-203	-0.27568	-0.440456
PRR36	4.36562e-203	0.0504835	1.77168
NUMA1	7.71329e-203	-0.294016	-0.824947
NDUFB10	2.88917e-201	-0.231473	-0.440412
FZD10	4.80155e-201	-0.3535	-2.20558
EPB41	5.46453e-201	0.302336	0.649732
ZFP800	5.96885e-201	0.199152	1.01987
TRIM37	7.08717e-201	0.309197	0.643939
SMARCD3	1.17571e-200	-0.658889	-2.48656
ATP5O	7.38751e-200	-0.207387	-0.32267
SOX6	1.06706e-199	0.0755765	1.66489
YPEL1	1.43644e-199	0.293315	0.848366
EPB41L3	3.09141e-199	-0.448009	-1.49841
HSP90AB1	8.04219e-199	-0.153631	-0.223894
DCLK1	1.14679e-198	0.0834235	1.53463
GNG11	2.36068e-198	-0.611829	-2.30962
X5930412G12RIK	3.75183e-198	-0.387665
ATRX	2.82166e-197	0.283514	0.506305
AP1M2	3.96165e-197	-0.623947	-3.26373
BCAS2	4.48297e-197	0.209769	0.37826
HNRNPA2B1	7.19885e-197	0.217432	0.345993
CHD3OS	9.59344e-197	0.240555	0.940285
ANK2	1.06927e-196	0.298014	0.937665
HES5	1.15115e-196	0.175806	1.20889
EML1	1.84717e-196	0.174887	1.10525
RNF7	2.23925e-196	0.199705	0.345745
TNNT2	3.64619e-196	-1.70347	-5.54925
FSD1L	1.20438e-195	0.155601	1.16087
CDC42EP1	2.84503e-195	-0.514117	-3.40107
NDUFB9	2.9342e-195	-0.189707	-0.297997
MYL6	1.28326e-194	-0.229624	-0.364573
SMAD7	1.9296e-194	-0.438699	-1.74151
CITED1	2.70417e-194	-0.663999	-2.16458
GJC1	3.26456e-194	0.367774	0.647921
SNHG6	3.92581e-194	0.332525	0.667546
VCAN	4.88214e-194	-0.529746	-1.1403
LHX1	5.74025e-194	-1.26537	-5.79798
SLC1A3	1.80519e-193	-0.396035	-1.88781
SIKE1	5.56671e-193	0.273746	0.660173
IGSF9	1.33697e-192	0.21631	1.01409
KIF15	1.89672e-192	0.30804	0.600119
ARMC10	2.27151e-192	0.307177	0.729194
VEZF1	2.74999e-192	0.346394	0.652421
TMEM121	1.02965e-191	0.250116	0.882058
BMP2	1.95233e-191	-1.03261	-4.66765
APELA	2.49788e-191	-0.856828	-3.26465
APPL1	5.48544e-191	0.270963	0.639687
SOX4	5.91066e-191	0.415651	0.564776
USP44	8.93975e-191	0.128621	1.22767
BRSK2	3.93362e-190	0.0407408	1.88654
MATR3	6.67721e-190	0.239576	0.443091
BNIP3L	9.17304e-190	0.265113	0.446073
CRMP1	9.38213e-190	0.296566	0.918584
TRA2A	2.62933e-189	0.241792	0.432407
FAM19A5	2.80565e-189	0.298035	0.839311
ZFP553	1.1827e-188	0.284506	0.648028
G3BP1	2.10059e-188	0.212341	0.379389
PROK2	1.4409e-187	0.00640351	3.58275
VAMP5	1.64293e-187	-0.728583	-3.18139
GPC6	2.58025e-187	0.305544	0.745116
PRRX1	3.43656e-187	-0.518546	-1.9113
ATP5J2	4.93165e-187	-0.158258	-0.242141
EEF1E1	8.0497e-187	0.283426	0.557277
ADAM19	9.87333e-187	-0.455792	-2.75331
JARID2	2.01254e-186	0.423096	0.756271
ATP6V1B2	4.02328e-186	0.27332	0.661281
PCNA	7.52941e-186	0.294591	0.568442
GATA4	7.97503e-186	-1.17709	-6.62941
ID3	8.77537e-186	0.836029	0.856436
DYRK3	3.06059e-185	0.210878	0.923591
MBIP	8.89112e-185	0.227738	0.730067
HINT1	2.63547e-184	-0.16797	-0.24556
ANXA11	3.67093e-184	-0.38516	-2.47
LMAN1	5.03125e-184	0.25405	0.47181
FOXF1	5.31316e-184	-1.19554	-5.78584
GM6133	1.42994e-183	0.306543	0.736106
FUT9	1.8277e-183	0.0342074	2.02084
FRAT2	2.28558e-183	0.26927	0.900274
NDUFS7	4.19729e-183	-0.217959	-0.393181
CDK6	4.44976e-183	-0.370417	-1.61698
FSTL1	5.14929e-183	-0.347063	-0.847447
CD9	7.31085e-183	0.334203	0.894734
SPATA13	1.40907e-182	0.218478	0.93365
ACADL	1.98309e-182	-0.306756	-0.987549
BCCIP	3.57736e-182	0.274592	0.523648
EPB41L2	5.39903e-182	-0.328991	-1.08405
THSD7A	1.03403e-181	0.0599596	1.76233
TUBB4A	1.29412e-181	0.195449	1.0422
LGALS1	1.30521e-181	-0.387034	-0.973229
MBTD1	7.03078e-181	0.306076	0.605581
GM26700	1.35178e-180	0.0179989	2.54724
NR6A1	1.54804e-180	0.402491	0.660741
TLE1	3.2912e-180	0.267837	0.86622
SFRP5	1.10227e-179	-0.793937	-3.52462
RAVER2	1.6947e-179	0.134861	1.06803
CRB3	1.74945e-179	-0.794669	-3.55068
S100A10	2.45641e-179	-0.470945	-1.0773
MED30	6.59785e-179	0.300922	0.586513
GPX3	3.51231e-178	-0.443679	-1.29526
ZFP280C	3.82765e-178	0.260997	0.784471
RPS8	6.13919e-178	-0.102483	-0.15296
ORMDL2	8.50983e-178	0.298614	0.56176
DCK	1.13441e-177	0.258786	0.739536
NEGR1	2.51373e-177	0.0424562	1.88132
HOOK1	3.13135e-177	0.250997	0.991321
NBL1	4.17469e-177	-0.534799	-2.86327
CTNND2	4.47056e-177	0.0478879	1.74232
PCNP	6.60668e-177	0.253204	0.485032
NKX2-5	1.12535e-176	-1.63937	-6.09078
IGFBP3	2.77913e-176	0.0932572	1.37194
DOCK7	5.25241e-176	0.293278	0.720897
CNPY2	1.26459e-175	-0.216864	-0.386419
CER1	1.44847e-175	-1.33604	-7.92052
RND3	1.63685e-175	-0.345735	-0.98607
COX7C	2.9631e-175	-0.160326	-0.237503
KRT19	5.6327e-175	-1.03819	-4.19638
RPS21	9.39013e-175	-0.155592	-0.235278
DSG2	2.03436e-174	-0.515036	-2.56835
STX3	2.63357e-174	-0.40388	-1.55439
THBS1	1.31164e-173	0.0761778	1.74381
NDNL2	1.39605e-173	0.284493	0.576494
POLR2D	1.61128e-173	0.241319	0.455493
SKIDA1	8.78929e-173	0.205446	0.999323
DEPDC7	1.30066e-172	0.108154	1.31263
SNHG20	2.48775e-172	0.286174	0.643867
PPP1R14A	2.71407e-172	-0.394554	-1.69768
IFI204	1.25714e-171	-0.814279	-4.54256
GALT	2.21027e-171	-0.33128	-2.01669
POLR2H	2.45696e-171	0.240252	0.455923
ASTN1	5.40731e-171	0.0522925	1.65528
ACTB	5.84527e-171	-0.17823	-0.272627
ACTA2	6.9848e-171	-1.34008	-4.00969
ZFP280D	1.56305e-170	0.286771	0.60974
INIP	1.77038e-170	0.264339	0.668387
DLC1	1.77521e-170	-0.451975	-1.45638
TMEM119	1.99513e-170	-0.564212	-3.883
CDH6	2.10308e-170	0.042899	1.84158
DMD	3.14675e-170	0.0632485	1.54278
SYNE2	4.66702e-170	0.227824	0.853024
TTC9	1.6265e-169	0.0257499	2.11741
S1PR2	2.99951e-169	-0.333798	-1.53908
VSTM2B	4.78691e-169	0.190646	1.1533
CUX1	5.33101e-169	0.254326	0.674089
MYEF2	7.83212e-169	0.303306	0.553676
TSPAN9	8.58541e-169	-0.368124	-1.65265
FAM49B	1.42517e-168	0.251899	0.507387
ABCD2	1.53493e-168	0.0400081	1.86168
ELAVL2	1.69713e-168	0.24168	0.923784
CDX2	1.90436e-168	-1.80677	-9.1199
MAGEL2	4.07727e-168	0.0688809	1.57856
PTBP2	4.56706e-168	0.292957	0.611064
DYNC1H1	4.83508e-168	-0.290979	-0.730925
SCAND1	6.10128e-168	-0.204008	-0.353936
RAB3IL1	8.46845e-168	-0.440777	-2.29886
TMEM51	9.62928e-168	-0.401679	-2.18198
MEF2C	1.04034e-167	-0.690635	-1.99116
PPP1CA	1.76802e-167	-0.160009	-0.229796
NPDC1	2.72499e-167	0.16948	1.0027
EID1	2.73085e-167	0.241987	0.429561
CAPN2	2.98714e-167	-0.336898	-1.13111
ADAMTS19	3.24513e-167	0.0497175	1.64068
BAMBI	3.24513e-167	-0.444192	-1.37596
CRYAB	5.06261e-167	-1.35193	-5.31466
PHTF1	7.48195e-167	0.220554	0.755898
GM5796	8.79246e-167	0.0135972	2.62843
ZEB1	1.81256e-166	0.264769	0.931493
EBF2	2.325e-166	-0.886176	-4.3609
NIPSNAP1	2.67785e-166	0.319226	0.620998
CKB	2.7529e-166	-0.420501	-1.39225
TPBG	3.61919e-166	0.26234	0.921397
BCL2L11	6.70437e-166	0.254503	0.822693
TMEM258	8.21568e-166	-0.194834	-0.297753
DOK4	1.28885e-165	-0.715278	-3.50066
NDUFA10	1.52552e-165	-0.213852	-0.408453
EPHA4	2.71008e-165	0.384451	0.904254
NDUFS6	3.07154e-165	-0.182728	-0.272984
DAD1	4.35333e-165	-0.195416	-0.323856
TEX9	5.19028e-165	0.270019	0.65371
RPS18	6.99861e-165	0.125441	0.195277
ARHGAP10	8.48201e-165	-0.265638	-1.01422
WNT2	1.44932e-164	-1.55414	-8.24634
HOXB4	1.47508e-164	-1.42931	-8.48162
SPR	2.78855e-164	-0.244998	-0.623808
ATP5E	5.13794e-164	-0.171129	-0.252455
WBP5	5.37043e-164	-0.267804	-0.411593
PROM1	5.57824e-164	0.274419	0.812912
HOXA2	5.57824e-164	-0.817848	-4.49785
BRI3	6.00371e-164	-0.213865	-0.356781
GATA3	1.40768e-163	-0.946469	-5.09846
ITGA8	2.4077e-163	-0.468074	-2.91499
MSRB1	4.04279e-163	-0.266512	-0.857839
PEX2	4.48756e-163	0.236189	0.647075
AEBP1	4.81114e-163	-0.401475	-2.44846
GNA14	8.23215e-163	-0.514081	-3.66532
NDUFA2	8.96372e-163	-0.17422	-0.27136
PPIB	1.60992e-162	-0.195062	-0.28347
PRSS23	1.67994e-162	0.122917	1.28437
IFT74	2.75126e-162	0.285681	0.557567
TMTC2	3.87536e-162	0.0454582	1.8096
TFRC	8.78924e-162	0.278518	0.690335
IKZF2	9.33122e-162	0.198288	1.07715
TBX3	1.17411e-161	-0.742762	-3.88677
LIFR	2.22911e-161	-0.378131	-1.87016
YAE1D1	2.64584e-161	0.249742	0.500625
RABAC1	3.22515e-161	-0.281417	-0.790189
EZH2	5.30802e-161	0.207992	0.371513
PCDH15	6.05771e-161	0.00391158	3.96623
CLIP3	2.35175e-160	0.233525	0.811113
KLHL2	9.99148e-160	0.180761	0.921978
COX6A1	1.14675e-159	-0.186718	-0.307372
COPS6	2.42171e-159	-0.212993	-0.424358
TMEM55A	3.24354e-159	-0.270015	-0.784035
FGFR2	4.72249e-159	0.240411	0.940554
FIGN	5.34864e-159	0.337742	0.825024
RBBP7	6.32483e-159	-0.269488	-0.440712
DTX3	9.12064e-159	0.2229	0.694517
CCDC171	1.21754e-158	0.060394	1.44693
FAM189A2	3.29379e-158	0.0289063	2.04182
ARID3B	4.46178e-158	-0.315385	-0.743839
SIX2	4.50586e-158	-0.8221	-3.9748
OLA1	5.25655e-158	0.201883	0.377385
YWHAE	7.57535e-158	0.123455	0.189771
ZMAT3	1.09271e-157	0.195844	0.809438
NDUFC1	4.17326e-157	-0.184612	-0.302889
GTF2IRD1	1.12824e-156	0.234786	0.664947
RNF113A1	1.74978e-156	0.127777	0.787578
SSX2IP	3.03758e-156	0.205159	0.772533
PLAC8	3.49714e-156	-0.452515	-2.01236
WDR6	3.54812e-156	0.281307	0.648997
TNNT3	6.67694e-156	-0.628728	-4.13902
ARL6IP6	7.77675e-156	0.260022	0.52943
CKAP5	7.88104e-156	0.276111	0.552798
HIST1H2AP	2.87923e-155	-0.685025	-1.11543
MACROD2	4.03091e-155	0.190435	0.892082
DNAJC3	8.82354e-155	-0.280321	-0.66401
PABPC4	8.85303e-155	0.249118	0.55615
NDUFB11	1.3113e-154	-0.187813	-0.30958
LAPTM4B	2.10163e-154	-0.339932	-0.877536
NDUFS5	2.84366e-154	-0.171174	-0.277222
FAM204A	3.80713e-154	0.226167	0.511199
PTGDS	5.12912e-154	-0.695583	-3.51884
ZCCHC11	7.93251e-154	0.255685	0.495247
LRP2	1.81319e-153	0.239401	0.894647
MYL2	5.99269e-153	-0.988525	-7.25697
PHIP	1.20118e-152	0.243593	0.4717
RBM38	1.25504e-152	0.207741	0.863585
X1500011B03RIK	2.2136e-152	0.248926
CRYBG3	2.72787e-152	-0.342725	-2.25239
FAM136A	4.29806e-152	0.20154	0.374434
GLIS2	4.82587e-152	0.10499	1.05111
TSPAN3	1.05239e-151	0.220023	0.402898
FREM2	2.60593e-151	0.151031	1.06208
EEA1	3.44523e-151	-0.306734	-1.11584
FHDC1	3.50204e-151	-0.380623	-2.24415
TCTEX1D2	5.46069e-151	0.225948	0.627835
NDUFA13	9.09369e-151	-0.171652	-0.276957
MOGAT2	1.21666e-150	-0.325707	-0.878374
RHOX5	1.5619e-150	-0.98604	-4.47657
TEAD4	1.6507e-150	-0.487057	-3.77198
EDNRA	1.82359e-150	-0.410765	-2.22606
GM10036	2.1243e-150	0.23158	0.4458
ROR1	2.39362e-150	-0.294867	-1.55152
MBNL2	2.42158e-150	-0.33177	-1.17911
CD248	2.45639e-150	-0.448589	-3.00169
HNRNPDL	2.49229e-150	0.196767	0.335717
NUP210	2.59198e-150	0.118473	1.09716
TMEM98	3.51551e-150	-0.29223	-1.67594
MIS18A	9.91651e-150	0.242475	0.581961
LRRC49	1.44501e-149	0.131777	0.995485
MT-ND6	1.48967e-149	0.395608	0.755001
HIST1H2AK	1.85839e-149	-0.524906	-0.927591
SQLE	2.15823e-149	0.232901	0.68323
CTH	2.21471e-149	0.145105	0.871261
HNRNPR	2.87085e-149	0.194296	0.357384
RALB	3.02643e-149	-0.329644	-1.22573
RTKN2	7.82803e-149	0.0774162	1.23729
TSC22D1	8.50801e-149	0.293416	0.531729
CTNNAL1	1.12275e-148	0.252394	0.724847
RHEB	1.23409e-148	0.206206	0.398161
GM2000	1.73293e-148	0.194724	0.345988
HAS2	1.75951e-148	-0.521487	-2.01713
LTBP1	1.77287e-148	0.147008	1.07029
RPL6	1.87024e-148	-0.122727	-0.192848
FSD1	2.16218e-148	0.203379	0.795715
RPL9	2.62664e-148	0.109206	0.163295
ATOX1	3.90303e-148	-0.18625	-0.305923
SERPINB6A	5.37462e-148	-0.295789	-0.81239
ALDH1A2	6.15024e-148	0.179972	0.465821
RGS5	7.42899e-148	-0.969126	-5.65496
TACC2	1.03046e-147	0.220764	0.64702
POPDC2	2.47763e-147	-1.15816	-6.07394
SNAI2	5.84566e-147	-0.600199	-2.89772
DPYSL2	8.70696e-147	0.281851	0.661873
ID1	1.2433e-146	-0.511877	-0.898379
GATA5	3.68589e-146	-1.77571	-8.32723
RPS16	3.85846e-146	-0.0904294	-0.135398
DEK	4.25267e-146	0.17587	0.273738
PKIG	1.49069e-145	0.226005	0.44602
FILIP1	1.8573e-145	0.028736	2.09855
R3HDM1	2.4776e-145	0.248603	0.52386
PFDN4	2.95521e-145	0.212774	0.428038
FTL1	5.1195e-145	-0.138233	-0.198531
CFAP20	8.76241e-145	0.22723	0.451479
BGN	1.11176e-144	-0.586831	-3.62379
TRMT10C	1.19888e-144	0.265449	0.609348
TGFB1	1.35464e-144	-0.716869	-3.72282
EPHA1	1.5999e-144	-0.409827	-2.83417
LARGE2	2.01964e-144	0.121114	1.09686
B4GALNT4	2.08606e-144	0.155751	0.8946
TCF21	2.31655e-144	-0.870598	-4.58202
GM12829	2.38738e-144	-0.916671	-5.99741
DERA	6.69892e-144	-0.231876	-0.540748
CASP8AP2	7.70143e-144	0.292689	0.525017
MTA3	9.14919e-144	-0.267006	-0.858163
GM9493	9.72061e-144	0.186888	0.336991
YBX3	9.91653e-144	0.193167	0.348712
CNTFR	1.20182e-143	0.273556	0.818931
ACTC1	1.36971e-143	-1.10013	-4.47607
PTPN18	1.42863e-143	-0.490727	-3.18189
LLGL1	2.66607e-143	0.232633	0.709942
ARMCX3	4.53355e-143	0.237912	0.74603
GJB3	6.65312e-143	-0.52899	-3.0679
ERDR1	1.22683e-142	0.230565	0.394479
H2AFZ	2.51751e-142	0.13256	0.190647
ZFP329	2.64414e-142	0.244912	0.6188
MYO18A	3.90148e-142	-0.327065	-1.2906
ARHGAP5	6.58166e-142	0.249214	0.501495
GM5786	7.94175e-142	0.240151	0.697031
BLVRA	1.07633e-141	-0.285559	-2.27365
H2AFY	1.3778e-141	0.253782	0.446376
BBC3	1.4212e-141	0.15057	0.895473
MAPK3	1.65227e-141	-0.238906	-0.516174
NR2F2	1.90354e-141	0.389216	0.921275
RSL1D1	2.57228e-141	0.191931	0.341459
NDUFB2	3.85516e-141	-0.212483	-0.477282
NKX2-4	5.58944e-141	0.00701261	3.75534
ANXA7	6.2522e-141	-0.281189	-1.12927
PRTG	7.76308e-141	0.302257	0.497649
TGFB2	9.08602e-141	-0.45858	-1.75219
BEX1	1.11865e-140	0.649423	0.61988
X2700038G22RIK	1.18936e-140	0.24223
FBRSL1	1.63201e-140	0.184402	0.77192
KLHDC2	1.76048e-140	0.195819	0.376005
ECHDC1	2.45487e-140	0.172707	0.755493
PAK1	2.54586e-140	0.308419	0.741091
RHOC	2.88846e-140	-0.283598	-0.836204
NRXN3	4.3211e-140	0.0539064	1.50075
CETN3	5.21813e-140	0.199164	0.388752
RBM15	7.10745e-140	0.234869	0.70286
MSMO1	1.05875e-139	0.197257	0.877226
AES	2.29988e-139	-0.328243	-0.79666
RFX7	2.43079e-139	0.258645	0.677062
FLNC	2.68495e-139	-0.312036	-1.30679
TRAPPC13	1.03766e-138	0.212501	0.487184
FBN2	1.27628e-138	0.360339	0.776288
ACADS	1.472e-138	-0.244984	-0.744317
FAM135A	1.66876e-138	0.172658	0.747736
X1500009L16RIK	1.8343e-138	0.267679
HAND1	1.94545e-138	-1.99542	-7.04132
CALB2	4.74755e-138	0.0502577	1.74264
RSPO1	8.22579e-138	-0.400398	-1.70015
ARL6IP5	1.34852e-137	-0.251273	-0.975053
KIF18A	1.43616e-137	0.203234	0.780109
BAG4	1.60468e-137	0.256541	0.582336
EMX1	2.1869e-137	0.00715574	3.07057
ARHGEF5	2.53309e-137	-0.449593	-3.11775
ZFP365	2.69284e-137	0.0741784	1.28468
NDNF	2.96835e-137	0.0791111	1.34691
CROCC	3.05822e-137	0.133151	0.941026
FGD5	4.4331e-137	-0.42849	-2.81108
MCF2	5.91265e-137	0.0777017	1.15475
OLIG2	6.44516e-137	0.00246229	4.85132
HCFC1R1	6.90234e-137	-0.284306	-0.914177
DTNA	7.54742e-137	0.0372087	1.76324
MINOS1	1.16519e-136	-0.17505	-0.276351
TPD52	1.55435e-136	0.207452	0.855035
TTC3	1.83751e-136	0.207429	0.370219
TAGLN	2.69428e-136	-0.839962	-3.19483
PITX2	4.64298e-136	-0.712029	-3.15079
DHRS3	5.86636e-136	-0.616211	-4.66048
CSRP2	7.075e-136	-0.384637	-0.647953
NID2	1.1268e-135	-0.320908	-1.16738
PBX4	1.27058e-135	0.0780403	1.24483
TOPBP1	1.51337e-135	0.236781	0.47014
IFITM2	1.7425e-135	0.243053	0.388282
ARHGAP31	1.78212e-135	-0.566438	-2.77564
GM38393	1.82572e-135	0.106818	1.04387
ACTN1	1.89634e-135	-0.263549	-0.541818
PKIA	3.03286e-135	0.111822	1.01841
GCSH	3.42167e-135	0.213558	0.427029
EWSR1	5.56805e-135	0.191686	0.373623
IFNGR1	1.25499e-134	-0.276829	-2.00674
NEDD1	1.45636e-134	0.180081	0.690341
LAMB1	1.76213e-134	-0.304819	-0.87546
GSTP1	2.21683e-134	-0.268539	-1.07003
SERPINF1	4.91769e-134	-0.381391	-2.59516
CAPG	5.33641e-134	-0.29445	-1.90708
URM1	7.10089e-134	-0.233915	-0.733169
TTC9C	1.62259e-133	0.222076	0.558752
MFGE8	1.97849e-133	-0.289158	-0.976217
NRP2	2.18387e-133	-0.433457	-1.09078
FAM60A	2.30327e-133	0.220138	0.387881
WASF3	2.33353e-133	0.178691	0.821019
IRAK1BP1	2.60832e-133	0.252391	0.573391
HNRNPH3	3.35229e-133	0.214277	0.411878
ST14	3.5414e-133	-0.661713	-4.87278
RGMB	3.96909e-133	0.119274	1.09851
USP29	5.97474e-133	-0.325532	-1.43717
PNISR	6.1447e-133	0.221752	0.436046
PAICS	6.25005e-133	0.175188	0.314709
ERBB3	6.45752e-133	-0.510223	-3.11251
PAIP2	9.35106e-133	0.176897	0.315544
GADD45B	9.42326e-133	-0.373717	-2.5361
CDC42EP4	1.00293e-132	-0.265193	-1.13738
CUEDC2	1.27058e-132	0.20998	0.431286
E130012A19RIK	1.71475e-132	-0.276804	-0.518604
ELAVL1	2.32393e-132	0.185385	0.353208
CDH3	3.162e-132	-0.823656	-5.69129
DPM3	3.44746e-132	-0.208363	-0.496991
HOXB3	3.5579e-132	-0.736875	-5.46844
ZIK1	5.18589e-132	0.156124	0.749708
UQCR11	7.51481e-132	-0.158472	-0.246642
ZCCHC24	8.20657e-132	-0.289082	-1.93187
UBE2D1	1.00192e-131	0.243581	0.494062
RPL27-PS3	1.00192e-131	0.178639	0.323265
FBXL14	1.17384e-131	0.218871	0.629269
X1810022K09RIK	1.49049e-131	-0.212991
LAMA1	2.11135e-131	-0.306334	-1.3548
LHFPL2	2.43963e-131	-0.29798	-1.71514
SMCO4	2.44386e-131	0.256162	0.542009
CADM1	2.96887e-131	0.377986	0.633448
CDX1	4.75557e-131	-0.903446	-3.33335
CCNT2	5.07313e-131	0.231402	0.52119
VGLL4	5.19674e-131	-0.295259	-0.775852
CKAP4	1.59424e-130	-0.23377	-0.521937
TSFM	4.00704e-130	0.211522	0.451982
ZFP871	5.2594e-130	0.207221	0.613246
NEK7	5.2594e-130	-0.256517	-1.3157
TGFBR3	1.1155e-129	-0.342441	-2.0283
LSM1	1.25588e-129	0.2081	0.418981
EIF1B	1.9093e-129	0.196186	0.352339
MRPL57	2.39023e-129	-0.196684	-0.375058
MMP16	2.94423e-129	0.0795649	1.21299
TUB	4.5795e-129	0.0424983	1.58082
CREB3L2	5.68135e-129	-0.283283	-1.48331
NEK1	6.26949e-129	0.180852	0.692505
ZFP703	6.89549e-129	-0.397889	-1.50866
P4HB	8.02053e-129	-0.214127	-0.391271
PCDH18	8.0873e-129	0.180785	0.953587
FOXD2	1.13339e-128	-0.780264	-4.79733
SERINC2	2.24127e-128	0.0999536	1.12217
SEC62	3.15316e-128	-0.199293	-0.360312
MTA1	5.75896e-128	0.212099	0.446771
GNG12	7.5349e-128	-0.307676	-1.23072
AKIRIN1	7.88591e-128	0.215915	0.482249
RSPO3	8.45057e-128	-0.725322	-2.68624
TBX20	8.47628e-128	-0.904861	-4.76191
NAT14	1.28162e-127	0.0560201	1.35875
RAB11FIP2	2.03874e-127	0.156031	0.720409
VANGL1	2.13345e-127	-0.29416	-1.38404
ENSA	3.12952e-127	0.225516	0.573429
HNRNPH1	3.2374e-127	0.205173	0.381398
X4921524J17RIK	4.37022e-127	-0.2399
TGFBI	5.03945e-127	-0.445499	-3.07786
DLK1	6.17587e-127	0.184763	0.827241
SUMO2	7.09349e-127	0.132549	0.202161
RUNX1T1	7.39228e-127	-0.426662	-2.29288
CDC25B	1.34531e-126	0.103396	1.06175
OCIAD2	1.52143e-126	0.087823	1.14288
MRPL42	1.72871e-126	-0.177409	-0.275346
AQP11	1.80993e-126	0.103367	1.07533
H2-KE6	2.7176e-126	0.224028	0.746323
ZFP292	3.76265e-126	0.243328	0.486197
AFAP1	4.29801e-126	-0.262333	-1.42725
CPED1	6.11552e-126	-0.602304	-3.50641
PRDM6	8.39516e-126	-0.736424	-4.43414
ZFP811	1.19616e-125	0.106406	1.08146
ZFP945	1.20399e-125	0.16808	0.706481
IVNS1ABP	1.30979e-125	0.228013	0.464228
SH3BGRL	2.05472e-125	0.269427	0.493714
X2810417H13RIK	2.25012e-125	0.251782
RPL41	2.67192e-125	-0.114956	-0.173499
RALBP1	6.06725e-125	-0.197187	-0.454485
HSP90B1	7.7938e-125	-0.187391	-0.27516
ZBTB8OS	1.35878e-124	0.210634	0.485593
ANP32A	3.01113e-124	0.163612	0.271981
HMGB3	3.59595e-124	0.185101	0.320258
LMO7	5.01117e-124	-0.312854	-2.00959
PNMA2	9.77714e-124	0.0898159	1.09679
CIAPIN1	1.05417e-123	-0.184053	-0.312982
TOX2	1.10531e-123	0.0462215	1.52028
SATB1	1.32295e-123	0.205317	0.735668
SLC7A7	1.6677e-123	-0.504651	-3.30821
TSPO	2.25722e-123	-0.250131	-0.661112
BTF3	3.27333e-123	0.114341	0.18106
ROCK1	3.64255e-123	-0.203038	-0.389935
PSMD14	3.66629e-123	0.176519	0.332751
LIMA1	4.13269e-123	-0.300734	-1.11429
ZMYND19	7.4392e-123	0.248098	0.496896
RIC3	1.08849e-122	0.124061	0.885181
SRPK1	1.12608e-122	0.179833	0.330724
ALCAM	1.19858e-122	-0.34449	-1.79475
EN1	1.22372e-122	-0.910012	-2.66558
PSME2	1.46888e-122	0.218144	0.477917
FMN2	2.29347e-122	0.0593799	1.39914
TMEM128	2.42147e-122	0.241412	0.526002
CTPS2	2.95111e-122	-0.232318	-1.13833
SELENOP	3.55611e-122	-0.405213	-1.5848
TDRD7	4.21198e-122	0.0526412	1.42936
ADD3	5.75901e-122	-0.293296	-0.67821
CYTL1	7.41343e-122	0.0110455	2.60264
SMIM3	7.51901e-122	0.118938	0.997248
MT-CO3	8.59941e-122	-0.203055	-0.299625
RNF138	9.07376e-122	0.243891	0.540252
OTX2OS1	1.28702e-121	0.0208562	2.04729
TIA1	1.31902e-121	0.230835	0.456473
ZKSCAN3	1.77125e-121	0.240131	0.553892
ISG20L2	2.26713e-121	0.241299	0.63717
PDE1A	2.26713e-121	0.00737096	2.99413
TBPL1	2.9569e-121	0.218268	0.474353
RIMS2	3.29123e-121	0.067434	1.22346
DDC	3.36288e-121	-0.295762	-1.8191
GM3764	5.11429e-121	0.00350742	3.95718
SPDL1	7.0535e-121	-0.240238	-0.659541
MSX2	9.31907e-121	-0.443368	-1.92847
KRIT1	9.4271e-121	0.242967	0.539993
HACE1	9.49315e-121	0.138313	0.856334
ZFP207	1.11304e-120	0.192292	0.374564
SLC25A3	1.53559e-120	-0.141292	-0.208988
NAE1	1.76442e-120	0.202388	0.423925
PLK2	2.06851e-120	-0.547989	-3.52961
RPL35	2.86678e-120	-0.175274	-0.25677
SEMA6A	3.2486e-120	0.201466	0.891382
RCBTB1	3.62989e-120	0.213445	0.602151
X4930503L19RIK	7.61604e-120	0.191094
RCC2	7.93602e-120	0.190267	0.356375
EMID1	8.56462e-120	0.0787819	1.16891
NPEPPS	8.86755e-120	0.239333	0.501176
PTPN13	1.14353e-119	0.306384	0.62933
LRRC4B	1.22876e-119	0.0699652	1.22358
YWHAZ	1.64288e-119	0.187214	0.330929
GM8797	1.7012e-119	0.228598	0.454756
SYT14	1.74615e-119	0.124252	0.844038
GM26652	1.78322e-119	0.015604	2.25059
A730049H05RIK	3.08148e-119	0.0315837	1.74005
EBNA1BP2	3.19415e-119	0.180394	0.331061
ITPR3	4.90458e-119	-0.288841	-2.32261
CLIP4	6.15631e-119	0.0470488	1.4707
NUDT21	7.26881e-119	0.160167	0.30001
PLXNA4	8.23577e-119	-0.547875	-3.67552
STRBP	9.45948e-119	0.21706	0.419241
EGFL7	1.0494e-118	-0.331803	-0.785332
IGF2R	3.60307e-118	-0.316609	-0.880527
RREB1	4.79749e-118	-0.25489	-0.968355
RPL38	6.53434e-118	-0.139524	-0.212915
ZFP706	9.79295e-118	0.161484	0.292553
HNRNPL	1.66514e-117	0.189578	0.350865
FERMT2	1.75016e-117	-0.239721	-0.476164
ST6GAL2	1.81898e-117	0.0339839	1.62623
SRSF1	1.92017e-117	0.196355	0.374137
SARNP	2.66877e-117	0.185426	0.349977
CUEDC1	3.11419e-117	0.227905	0.778901
HNRNPH2	3.47777e-117	0.199987	0.423378
PPFIBP2	4.15909e-117	-0.434452	-3.37908
N4BP2	5.2424e-117	0.256243	0.567025
THSD4	5.72294e-117	-0.30132	-2.439
PHLDA3	7.60168e-117	-0.324445	-1.23021
SPINT2	7.72921e-117	0.152948	0.214539
FLRT3	7.97834e-117	0.335047	0.727327
XIST	8.9292e-117	0.02743	-0.0767204
RNF5	9.84957e-117	0.238235	0.550119
TRIM59	1.54115e-116	0.246098	0.487352
MYL9	1.80548e-116	-0.389162	-1.50615
ICK	1.98708e-116	0.180724	0.645564
EFCAB1	3.40861e-116	0.0481418	1.43988
LAD1	3.73223e-116	-0.591458	-4.82022
SMARCC1	4.12295e-116	0.199913	0.368254
MEX3D	4.60164e-116	0.193894	0.654027
RAPSN	5.39205e-116	0.0142776	2.21647
PATZ1	7.49068e-116	0.226635	0.533024
RFLNB	8.43959e-116	0.160322	0.761469
MIB1	8.90767e-116	0.201919	0.621756
LHX1OS	1.14307e-115	-0.666437	-6.20026
SCOC	1.31283e-115	0.22744	0.472951
FHOD3	1.33153e-115	0.112726	1.01512
SH3GL3	1.42845e-115	-0.299829	-2.07124
CRB2	1.83432e-115	0.130574	0.919723
RAB28	2.15995e-115	0.224819	0.613598
PSRC1	2.40392e-115	0.221742	0.659009
CRYBA1	3.03536e-115	0.0197791	2.04102
LRP10	4.77678e-115	-0.262204	-1.21679
ETFA	5.33541e-115	-0.239973	-0.696483
LDHB	5.42383e-115	0.348154	0.580827
MYO5A	6.84738e-115	0.183877	0.662185
PPIP5K2	7.51522e-115	0.219624	0.558589
COX5A	8.38895e-115	-0.135899	-0.200959
PLPP2	8.50073e-115	-0.252645	-1.05121
DLL1	9.15182e-115	0.0879072	0.97167
FAM162A	1.19644e-114	0.22661	0.34876
SEPT4	1.23635e-114	0.0470242	1.50332
TMEM251	1.44186e-114	0.17107	0.564518
BOC	1.53833e-114	-0.258244	-1.69323
RSRP1	1.58711e-114	0.205494	0.400565
TSPAN17	1.60851e-114	-0.59843	-5.3131
SELENOS	1.96012e-114	-0.221775	-0.465189
KLHL9	2.04458e-114	0.21288	0.534381
ANK3	2.15764e-114	-0.290945	-0.903505
CCNB1IP1	2.20823e-114	-0.481857	-4.38513
RFX3	2.59809e-114	0.165147	0.810906
ELOVL1	2.85801e-114	-0.263822	-1.10568
MT-CO1	3.0464e-114	-0.178907	-0.25662
PDLIM7	3.82658e-114	-0.25865	-0.60409
GM42637	4.38803e-114	-0.423475	-3.33019
CDK2AP1	4.57694e-114	0.20169	0.377496
NCBP1	4.75765e-114	0.19594	0.42361
FRMD6	6.21689e-114	-0.29012	-1.1651
NDUFA5	6.52524e-114	-0.165548	-0.269995
SELENOI	7.56549e-114	0.212717	0.570753
X2200002D01RIK	8.30994e-114	-0.271066
MAT2A	9.03863e-114	0.186138	0.343492
F2R	9.19201e-114	0.255763	0.689778
ATP5J	1.00992e-113	-0.117674	-0.166352
SDSL	1.31832e-113	0.129769	0.823638
KCNG1	1.61752e-113	0.0441165	1.41103
SMARCD2	1.66984e-113	-0.243205	-0.904816
KRR1	1.6792e-113	0.213649	0.478668
MEAF6	7.01529e-113	0.217382	0.4578
SP5	1.83176e-112	-0.369985	-1.17719
CLU	2.1103e-112	0.143437	0.764308
PAFAH1B2	2.12235e-112	0.207276	0.431621
LTBP4	2.52973e-112	0.0440618	1.36857
RC3H2	2.76873e-112	0.219394	0.580979
BMYC	3.17148e-112	0.218556	0.450168
FRMD4B	3.27563e-112	-0.305138	-1.60184
CYC1	4.30461e-112	-0.165498	-0.284668
MRPS21	4.32642e-112	-0.154877	-0.239398
EBP	5.45835e-112	-0.225053	-0.688181
LMX1B	5.54355e-112	-0.30636	-1.98139
PRKAG1	6.03374e-112	-0.222781	-0.796259
NUTF2	6.08559e-112	0.173552	0.641041
PEA15A	9.38172e-112	0.209086	0.698588
CDC26	9.73196e-112	0.189768	0.373512
DDR2	1.22719e-111	-0.820339	-4.64287
TMEM243	1.78976e-111	0.19896	0.619368
STMN3	2.14055e-111	0.118639	0.889212
MFAP4	2.69608e-111	-0.298876	-1.34864
KCNC3	3.1057e-111	0.102511	0.98195
UBE2K	3.29013e-111	0.18968	0.346888
ELK3	3.34987e-111	-0.34725	-1.88961
SOGA3	3.80821e-111	0.140966	0.905068
BCAM	5.67174e-111	-0.310668	-1.23009
CTSH	6.12868e-111	-0.857525	-4.5711
MID1	6.869e-111	0.245752	0.614376
PAM	7.76241e-111	0.185897	0.818025
RPS9	8.68539e-111	-0.102887	-0.147378
CXXC5	9.66079e-111	-0.248455	-0.648605
RAB39B	1.12933e-110	0.137171	0.809439
SOX12	1.44503e-110	0.239837	0.573157
LPL	1.63584e-110	0.164122	0.840006
CACYBP	1.64663e-110	0.161221	0.275455
PTGES3	1.69977e-110	0.147058	0.245888
MDFI	1.72996e-110	-0.269353	-1.09561
CYP51	1.93194e-110	0.194078	0.652526
ZFP532	1.96457e-110	0.2206	0.649719
CXADR	2.3546e-110	0.269784	0.622786
AMOT	2.36892e-110	-0.339977	-0.961262
FLT1	2.8451e-110	-0.757834	-3.49926
LBH	3.09699e-110	-0.316765	-2.1454
GDPD1	3.28071e-110	0.124797	0.919433
F11R	3.46197e-110	-0.289519	-1.05771
FRRS1L	3.59504e-110	0.047787	1.45449
SEH1L	4.02727e-110	0.19072	0.411245
PHB	4.54145e-110	-0.192346	-0.39151
WFDC2	4.56743e-110	0.265449	0.544834
SPINK1	5.15614e-110	-0.538798	-1.77959
IGF2BP3	5.27284e-110	0.193869	0.383827
PHOX2A	5.83039e-110	-0.416406	-2.86718
LPAR3	6.19153e-110	-0.372747	-3.05386
ATR	8.64932e-110	0.194609	0.655404
FLI1	9.15606e-110	-1.03637	-4.75807
MEX3A	1.1786e-109	0.240453	0.490986
ARL6	1.22161e-109	0.221824	0.561259
GAL	1.5174e-109	-0.712727	-3.9352
GOLM1	2.87832e-109	0.20988	0.433282
HMGCS1	3.27097e-109	0.20431	0.560672
PODXL	3.34884e-109	-0.288761	-0.786435
ATAD1	4.04329e-109	0.194096	0.50141
CDKL1	5.91938e-109	-0.507367	-4.08836
WNT6	6.25435e-109	-0.920008	-4.26158
PDIK1L	6.82435e-109	0.135309	0.70907
PAPPA	6.89704e-109	-0.299368	-1.78021
CMAS	7.73853e-109	0.220278	0.50853
SLC25A5	8.19574e-109	-0.184905	-0.274523
HIST3H2BA	8.35684e-109	0.169237	0.826227
PTPRE	9.44868e-109	-0.445285	-3.02575
SULF2	1.18257e-108	0.222267	0.686393
FGD4	1.33521e-108	0.0823076	1.12224
RIN3	1.34062e-108	-0.32948	-2.75872
RGS20	1.78226e-108	0.0112321	2.50036
APC2	2.27692e-108	0.0285964	1.68813
PRDM5	2.40814e-108	0.14593	0.673021
MLLT10	2.88542e-108	0.200145	0.436812
DQX1	3.04226e-108	-0.31611	-1.1832
HAP1	3.04587e-108	0.0436381	1.45621
AP5M1	5.92298e-108	0.100619	0.899782
RASGRP2	7.75764e-108	0.0353231	-0.101103
B230354K17RIK	9.55211e-108	0.181958	0.659816
PDCD2	9.98795e-108	0.1861	0.44093
SUMO1	1.20381e-107	0.134761	0.234557
PHLDB2	1.20381e-107	-0.241675	-0.725402
CAR3	1.55362e-107	-0.341979	-2.01145
RNH1	2.15694e-107	-0.231708	-0.683465
NXT1	2.29673e-107	0.191445	0.388067
ESD	4.64903e-107	0.148204	0.275515
LDB1	7.2423e-107	0.232707	0.541427
GM26669	1.14713e-106	0.0854118	1.11929
SH3PXD2A	1.33113e-106	-0.238177	-1.22325
LAMA4	1.55368e-106	-0.478651	-3.66396
GM26735	1.98971e-106	0.14498	0.806278
NANOG	2.06022e-106	-0.603868	-4.669
SPATS2	2.13756e-106	0.220428	0.467815
PAM16	2.31469e-106	-0.179923	-0.363875
X6720489N17RIK	3.1965e-106	0.108465
MESP1	3.43637e-106	-1.31885	-6.23362
TTC14	4.53532e-106	0.193078	0.389169
FRAS1	4.59142e-106	0.103179	1.00758
COX7B	4.78515e-106	-0.134303	-0.192511
PNPT1	1.33499e-105	0.170234	0.599681
PFAS	1.80913e-105	0.192541	0.558519
KDM7A	1.82704e-105	0.201416	0.728809
NCAM1	1.85153e-105	-0.268307	-0.864963
NRBP1	1.97285e-105	-0.186157	-0.470924
NDUFB8	2.52837e-105	0.136412	0.231622
ZFP664	2.75408e-105	0.203661	0.401636
DHX9	2.85175e-105	0.221673	0.413655
RRS1	2.91376e-105	0.1992	0.40201
SUPT16	3.22591e-105	0.172472	0.311624
IGLON5	3.48984e-105	0.0662383	1.14719
ZFP760	3.99499e-105	0.150008	0.744988
MYL12B	4.13398e-105	0.191045	0.371476
UQCRC1	5.1156e-105	-0.173826	-0.350942
MARCKSL1	5.13643e-105	0.15272	0.250193
CCDC92	5.21948e-105	0.0731424	1.05481
GLS	5.25125e-105	0.235304	0.580326
PRPS1	5.97652e-105	0.260899	0.493707
X1010001N08RIK	1.0873e-104	-1.14616
SEMA4B	1.10436e-104	0.0874125	1.02442
FHL2	1.25881e-104	-0.30537	-1.87898
PTMA	1.34649e-104	0.120094	0.182581
NUDCD2	1.3823e-104	0.155584	0.30068
FREM1	1.4551e-104	-0.221397	-1.43582
BICC1	1.45624e-104	-0.294035	-1.41783
MAST4	1.60863e-104	0.228522	0.603729
EFNA1	1.62528e-104	-0.425037	-3.33372
MME	1.76812e-104	-0.359775	-2.26604
SDC3	1.772e-104	-0.302135	-1.6723
DPYSL5	1.95265e-104	0.21312	0.724922
DYNC2H1	1.99273e-104	0.188719	0.677116
HNRNPAB	2.4287e-104	0.1297	0.21559
RBM3	2.73582e-104	0.149011	0.258408
TNIK	3.22401e-104	-0.352389	-2.61059
ACAA2	3.50117e-104	-0.254253	-0.793684
ANKRD13B	3.82775e-104	0.0917789	0.955051
LFNG	4.02852e-104	0.102124	1.03896
RBM4B	4.03897e-104	0.198315	0.517059
RAMP3	7.57045e-104	0.0531362	1.29027
TMEM107	9.07849e-104	0.202743	0.647565
RPS12-PS3	9.08009e-104	0.121427	0.206263
BC005561	1.095e-103	0.208297	0.413624
KLK8	1.18644e-103	0.274033	0.578525
SPINK2	1.24208e-103	0.0220551	1.86052
NDRG2	1.32423e-103	-0.316408	-2.72783
PAX9	1.35423e-103	-0.811072	-4.61284
ATP6V0E2	1.77792e-103	0.062467	1.17321
CLASP1	1.85227e-103	0.201804	0.532528
LRRC42	2.68074e-103	0.201206	0.429419
HSP90AA1	2.75505e-103	-0.148333	-0.202093
PDE7A	3.04641e-103	0.205178	0.527415
DUT	3.38116e-103	0.173683	0.288671
EED	3.85055e-103	0.181201	0.410655
YTHDF2	3.85827e-103	0.195423	0.403291
SNN	4.29922e-103	0.193496	0.614187
PUM2	4.62134e-103	0.200069	0.43807
PLEKHM3	5.04344e-103	0.0571474	1.16108
DCLK2	5.38344e-103	0.0425282	1.36293
GFRA2	6.28856e-103	-0.288502	-2.40501
ALX1	8.76406e-103	-0.381501	-2.02955
KDF1	1.07596e-102	-0.34889	-2.969
SVEP1	1.94857e-102	-0.335616	-2.3399
EMILIN2	2.37313e-102	0.0579065	1.18165
PRDM1	2.82858e-102	-0.292147	-1.83707
ROMO1	4.49837e-102	-0.156607	-0.271174
CD2AP	4.82046e-102	0.215861	0.435264
ZFP239	5.36405e-102	0.161221	0.63632
RGS3	7.28486e-102	-0.253263	-1.29393
ELOVL2	7.92584e-102	0.0934512	1.00765
NIP7	7.96301e-102	0.184051	0.374315
LAMC1	1.1324e-101	-0.244482	-0.769458
FKBP11	1.14421e-101	-0.239461	-0.555516
VCL	1.15023e-101	-0.242714	-0.733379
GAS2L3	2.099e-101	0.11516	0.911011
CBLN2	2.21008e-101	0.0119754	2.51453
FKBP4	3.14696e-101	0.139028	0.233722
FKBP5	3.28133e-101	0.174877	0.59559
APOBEC2	3.79539e-101	-0.916021	-6.17775
SOX10	3.99115e-101	-0.549343	-3.12643
SH3GLB1	5.91296e-101	-0.230098	-0.428188
S100A13	6.95021e-101	-0.251075	-1.69873
LSM5	7.41359e-101	0.146341	0.280548
SCAI	7.58788e-101	0.145128	0.734275
NKX2-9	7.88351e-101	0.0833946	1.78099
GPR162	9.50915e-101	0.0501493	1.31179
RAD23B	1.28598e-100	0.169365	0.338739
CYB5R3	1.44534e-100	0.192978	0.383371
LGALSL	1.51501e-100	-0.20946	-1.03681
COX7A2	2.05068e-100	-0.109166	-0.160278
BCLAF1	2.09015e-100	0.173427	0.330169
MARK3	2.23762e-100	0.201634	0.459015
FOSB	2.3858e-100	-0.566008	-4.22941
CASK	2.42739e-100	0.156599	0.732041
CEP44	2.92915e-100	0.180033	0.554558
SEMA3F	3.11966e-100	-0.233335	-1.45746
HDGF	3.54539e-100	0.138294	0.238329
ZFP629	3.64312e-100	0.119316	0.776614
MECP2	3.97123e-100	0.174847	0.580417
ITPR1	3.99001e-100	-0.258728	-1.03539
X2810428I15RIK	4.3297e-100	-0.158615
MNAT1	1.02204e-99	-0.196201	-0.434443
AKAP13	1.15365e-99	0.206343	0.570114
FGFR1OP	1.1907e-99	0.176555	0.535638
PPAT	1.41387e-99	0.188605	0.391391
GM10260	1.45557e-99	-0.176387	-0.249848
SLC27A4	1.48429e-99	-0.204114	-1.41099
SPOP	1.66574e-99	0.212355	0.453885
GM28050	1.95939e-99	0.024977	1.65649
POU2F1	2.2183e-99	0.189895	0.550976
TFAP2B	2.30902e-99	-0.538582	-2.88186
CDC7	2.36857e-99	0.174526	0.579836
DCAF17	3.27199e-99	0.210259	0.510203
ENAH	3.56521e-99	0.209533	0.416876
ZFP638	4.00606e-99	0.211274	0.433474
SET	4.92074e-99	0.128849	0.206225
TNNC1	5.46521e-99	-0.894907	-3.91681
HIP1	5.72609e-99	0.249467	0.526963
KIF1B	6.39502e-99	0.233208	0.504767
KLHL6	6.48406e-99	-0.92339	-5.03004
MGA	6.52082e-99	0.226002	0.506396
DTX4	6.92078e-99	0.101318	0.972303
MYL12A	8.53307e-99	-0.184981	-0.311386
DDR1	1.45769e-98	0.155257	0.76428
GTPBP10	1.65654e-98	0.169532	0.593982
CDKL3	1.77638e-98	0.0838153	0.943422
UNC5C	2.29785e-98	-0.356023	-2.25633
MRPL4	2.72714e-98	-0.17914	-0.40538
DEGS1	4.97762e-98	-0.24201	-0.578425
FAM192A	5.14632e-98	0.177618	0.40107
NFIB	5.64923e-98	-0.368467	-3.03867
SENP3	6.32795e-98	0.215353	0.523406
NCAN	6.79649e-98	0.0309752	1.56168
SORD	7.27868e-98	-0.235016	-1.68697
JDP2	8.50344e-98	-0.325217	-2.49488
GDF11	9.24973e-98	0.0977342	0.875479
MYOCD	1.24584e-97	-1.2458	-5.97592
HNF1B	1.63503e-97	-1.19241	-8.06504
PNRC2	1.64996e-97	0.198784	0.468218
SUV39H2	1.77414e-97	0.20353	0.465063
IGFBP5	2.32687e-97	0.288482	0.582051
CDCA7	2.89428e-97	0.249043	0.440145
FDX1	4.58789e-97	-0.216858	-0.847393
MYEOV2	4.84753e-97	-0.151803	-0.258772
NDUFV1	5.66767e-97	-0.171614	-0.391338
UBE2M	6.48271e-97	-0.135951	-0.206638
FAM213A	6.79393e-97	-0.233437	-0.470756
RAD23A	7.24013e-97	0.182742	0.446342
FBN1	7.38678e-97	-0.266242	-1.65988
LDHA	8.57241e-97	0.131475	0.200918
TLK1	9.86519e-97	0.202872	0.434005
RNF208	1.11367e-96	0.0587638	1.20473
GAP43	1.21764e-96	0.165517	0.588946
MRGBP	1.33801e-96	0.160821	0.553275
MAPK13	1.33871e-96	-0.268481	-2.05192
UACA	1.46954e-96	-0.280237	-0.687319
ANXA4	1.63682e-96	-0.265251	-1.99781
EMSY	1.87184e-96	0.192255	0.466188
HADHB	2.058e-96	-0.217271	-0.783609
CAMKV	2.40618e-96	0.08615	1.01273
BAG3	2.64154e-96	-0.212084	-1.11343
RAD51	3.56605e-96	0.190861	0.410542
DENND5B	1.03716e-95	0.18748	0.638521
NFIL3	1.17778e-95	-0.253432	-1.01241
MTERF1A	1.33971e-95	0.0753516	0.899109
EFHD1	1.51289e-95	0.0126211	2.13181
TMEM237	2.67582e-95	0.198875	0.475013
CYR61	2.94057e-95	-0.282225	-1.40936
ROBO1	3.31737e-95	0.171223	0.724849
SRRM1	3.54626e-95	0.141869	0.254328
ST8SIA3	3.7957e-95	0.114688	0.864399
FAM92A	4.07508e-95	0.20645	0.42149
GORASP2	4.9629e-95	-0.197464	-0.477554
OSR1	5.17797e-95	-1.20912	-7.69425
SMC5	7.40184e-95	0.202311	0.455139
PTP4A1	7.88302e-95	0.186295	0.396838
SAT1	9.34157e-95	-0.260228	-1.03708
CLMP	9.98623e-95	-0.271919	-1.23672
PEAK1	9.99051e-95	-0.222961	-0.842911
GALNT7	1.01971e-94	-0.234102	-0.691521
AXIN2	1.19124e-94	-0.22917	-0.706092
SERTAD1	1.66144e-94	-0.212281	-1.04581
TRIM2	1.7331e-94	0.187773	0.740012
NUDT5	1.88453e-94	0.15267	0.303917
TRNT1	2.06698e-94	0.193814	0.417975
HALR1	2.64685e-94	-0.756488	-5.09932
KITL	3.3721e-94	-0.263477	-1.20924
KDELR3	3.69621e-94	-0.316576	-2.08804
ZDHHC12	3.7946e-94	-0.230156	-0.772399
STRA6	3.92001e-94	-0.267269	-1.32877
RPL13A	3.95092e-94	-0.161721	-0.254682
SLC35F1	4.54547e-94	0.0631726	1.15022
MRPS16	4.54547e-94	-0.159094	-0.282858
HINT2	4.54547e-94	-0.196409	-0.517252
RSL24D1	4.61985e-94	0.184295	0.382789
PSMD7	5.11403e-94	-0.148232	-0.24024
DACT3	5.38873e-94	-0.244153	-1.61543
COX6B1	5.79914e-94	-0.114023	-0.168931
JADE1	5.80818e-94	0.225348	0.645683
SRSF10	5.95888e-94	0.144654	0.269353
T	8.55282e-94	-0.853031	-4.12792
CHST2	9.22139e-94	0.185709	0.749656
GTF2H3	1.51773e-93	0.203769	0.489669
RBM47	1.92715e-93	-0.820961	-5.61001
CEBPG	2.12452e-93	0.181627	0.466673
USP1	2.12682e-93	0.19799	0.40208
FUBP3	3.02052e-93	0.201811	0.504547
GM3696	3.55024e-93	0.00878891	2.44464
ZMYM4	4.24741e-93	0.198642	0.452521
TBC1D1	4.49403e-93	0.184474	0.615356
UBALD2	4.8481e-93	-0.202361	-0.42099
EBF1	5.28702e-93	-0.393503	-1.28734
RNF145	5.56278e-93	0.190481	0.548147
NETO2	7.3915e-93	0.102157	0.8214
LSM14B	8.0722e-93	0.196323	0.557104
HAGLR	9.60768e-93	-0.537152	-4.81158
SMAGP	1.19257e-92	-0.350896	-2.65265
FAM78B	1.20349e-92	0.0421792	1.34098
DBF4	2.06864e-92	0.194859	0.405831
PTGES	2.17776e-92	-0.268465	-2.28045
ACP5	2.54001e-92	-0.271305	-2.46198
TSC22D3	2.79645e-92	0.170695	0.61439
SFPQ	3.08429e-92	0.161432	0.282925
DPF3	3.23849e-92	-0.555466	-4.9338
RBM15B	3.31958e-92	0.190526	0.502785
ZSWIM7	3.47432e-92	-0.211318	-0.705237
ORMDL1	3.67606e-92	0.180635	0.508282
NPC2	3.89121e-92	-0.180664	-0.332383
D5ERTD579E	4.09852e-92	0.162362	0.613795
EP300	4.74962e-92	0.185854	0.460684
RHOJ	5.12549e-92	-0.525366	-3.07557
UBE2N	5.45772e-92	0.140466	0.264653
TROVE2	6.10739e-92	0.189761	0.605627
FOXO1	9.00319e-92	-0.22108	-1.06791
X1810041L15RIK	9.37097e-92	0.0233766
NEDD4	1.01289e-91	0.148077	0.25327
NR2F6	1.10369e-91	0.237494	0.484522
FOS	1.11891e-91	-0.435882	-3.27727
SLC2A3	1.16446e-91	0.590811	0.494045
SBK1	1.18384e-91	0.143597	0.772366
SAMD14	1.37706e-91	0.0891505	0.846139
ACSL1	1.43323e-91	-0.212875	-1.37379
RANBP1	1.44247e-91	0.11379	0.177287
TPT1	1.46472e-91	0.0829006	0.136477
CCDC124	1.76807e-91	-0.157764	-0.299394
FEZ1	1.97453e-91	0.0667865	0.493935
TWIST2	2.16917e-91	-0.479354	-3.88483
BCL7A	3.18154e-91	0.192719	0.538861
ARHGAP28	3.79758e-91	-0.242345	-0.8265
MT3	4.01779e-91	0.043594	1.33076
TUBA4A	4.30266e-91	-0.267857	-2.10186
SON	5.2191e-91	-0.146679	-0.229149
CENPB	5.54771e-91	0.198342	0.441353
DNAJC1	5.73979e-91	-0.242623	-0.593546
GM3739	5.93362e-91	0.0663214	1.02098
UTF1	6.30655e-91	-0.39033	-3.13759
TMEM54	7.34462e-91	-0.432082	-3.38867
OGT	7.72533e-91	0.219576	0.466675
CRIP1	1.16678e-90	-0.263755	-0.964556
RPS14	1.64017e-90	-0.0707023	-0.101474
PIANP	1.68462e-90	0.0738513	1.03655
NDUFA1	1.80301e-90	0.155902	0.296876
PRKCI	2.65076e-90	0.151689	0.665953
NPM3	3.06683e-90	-0.204703	-0.309173
KRT7	3.17893e-90	-0.790633	-4.643
PLAC1	3.63717e-90	-0.841133	-5.90429
C030018K13RIK	4.54069e-90	0.0130254	2.17382
CD55	5.16223e-90	-0.695281	-5.00956
CTSA	5.18656e-90	-0.217598	-0.60983
SMEK1	8.54492e-90	0.192121	0.440155
XPOT	9.70536e-90	0.198793	0.503438
GPR45	9.84094e-90	0.0490871	1.23183
BLM	1.28363e-89	0.19159	0.444319
TNS1	1.3347e-89	-0.250978	-2.13382
FBXL16	1.41709e-89	0.0208521	1.74893
AMT	1.48464e-89	0.149793	0.69945
UNC13B	1.72938e-89	0.075538	1.05036
RCN2	2.05791e-89	0.225167	0.425692
PTK7	2.60356e-89	-0.2204	-0.716044
RPS5	3.72396e-89	-0.0808426	-0.11884
CTNNB1	5.37512e-89	0.151734	0.281159
DAPK3	5.7852e-89	-0.194364	-0.492967
ZFP146	6.35426e-89	0.146205	0.606392
WNK3	6.90601e-89	0.178778	0.623414
FAM76B	7.25195e-89	0.181625	0.471125
KIF26B	7.63135e-89	-0.256709	-2.12772
LARS2	8.10347e-89	-0.232281	-0.814153
DDAH1	9.35638e-89	0.224329	0.582638
PLPP3	9.52599e-89	-0.257914	-0.756259
GM3550	1.10794e-88	0.168133	0.530931
GMPS	1.11885e-88	0.153058	0.297108
RBM11	1.19046e-88	0.0139096	2.10641
UTP6	1.25399e-88	0.188311	0.478965
TMEM82	1.62712e-88	-0.22383	-1.77848
EPHA2	2.37843e-88	-0.330711	-2.81571
SSSCA1	2.41993e-88	-0.17438	-0.292334
MAGOH	2.89994e-88	0.132913	0.230153
RPL34	4.59017e-88	-0.0834018	-0.124915
VASN	6.12758e-88	-0.208157	-1.55245
ORMDL3	6.17778e-88	0.145391	0.462432
GM26917	8.96556e-88	0.279133	0.506835
GATA2	1.36625e-87	-0.539173	-4.29612
FAM216A	1.37766e-87	0.198374	0.475966
PIM2	1.42518e-87	-0.0157983	-0.286446
TUBA1B	1.55028e-87	0.125803	0.210668
ADAM23	2.08081e-87	0.0429565	1.2455
RPS28	2.13023e-87	-0.113094	-0.169243
TRP53BP1	2.23091e-87	0.181569	0.4503
OAZ1	2.50754e-87	0.0967485	0.141032
ATAD5	2.57255e-87	0.218116	0.5262
CTDSPL2	2.66509e-87	0.180041	0.461125
TRAF3IP2	2.66523e-87	-0.258541	-2.40861
PRR3	2.80205e-87	0.13557	0.579005
CD1D1	3.02259e-87	0.0363282	1.34768
STMN4	3.78971e-87	0.00310878	3.60439
TRABD2B	4.02101e-87	-0.213211	-1.38655
TAF15	5.16829e-87	0.191349	0.392705
HHEX	5.77042e-87	-0.536453	-3.07273
CCDC50	6.19219e-87	0.197916	0.397196
RPL13	6.64184e-87	-0.0845564	-0.120224
CDC14A	7.53076e-87	0.119705	0.728081
TCF12	9.2283e-87	0.273028	0.48839
X2010107E04RIK	9.78344e-87	-0.12773
SMOC2	1.10451e-86	-0.659073	-4.39772
DENND5A	1.12507e-86	0.134974	0.612189
ABCA9	1.14972e-86	-0.537312	-4.6438
ZMYM2	1.36681e-86	0.199275	0.506754
ARRB2	1.70524e-86	0.137303	0.642692
S100G	2.10728e-86	-1.6307	-7.09568
SOX17	2.14715e-86	-0.630747	-3.45509
DOC2A	2.26706e-86	0.0307391	1.43198
SPRED3	2.53684e-86	0.0719019	0.99956
NKX2-2	2.9007e-86	0.0123633	2.47835
LRRN4	3.64103e-86	-0.26086	-1.61857
GFRA3	4.49219e-86	-0.299797	-3.23339
MYDGF	7.94609e-86	-0.160994	-0.314985
NIPSNAP3B	8.37639e-86	0.174772	0.437432
ARHGEF26	8.76031e-86	-0.220254	-1.11624
MTERF3	8.77216e-86	0.17639	0.539373
PRSS8	9.86348e-86	-0.301743	-1.85936
ZCRB1	1.23395e-85	-0.159681	-0.264322
DCTPP1	1.27309e-85	0.155993	0.25762
SRSF4	1.33448e-85	0.174094	0.393901
MBD3	1.47476e-85	-0.146542	-0.222806
FMNL2	1.62296e-85	0.159904	0.580201
FUNDC1	1.68301e-85	-0.194589	-0.682628
USP37	1.82038e-85	0.205347	0.531741
BTRC	2.01722e-85	-0.193499	-0.733972
D930016D06RIK	2.23108e-85	0.134341	0.598614
DAP	2.41001e-85	-0.200546	-0.562338
CLDN3	2.76014e-85	-0.403563	-3.1165
LSM8	2.85306e-85	0.15413	0.306039
ATP6V0E	3.48657e-85	-0.166188	-0.308039
RIF1	3.74367e-85	0.194181	0.383035
HAT1	5.30823e-85	0.152314	0.281867
SPIRE1	5.56513e-85	0.1679	0.584816
B4GALT1	6.45604e-85	-0.180073	-0.844382
KIF5A	6.84827e-85	0.0585461	1.10093
SOX9	7.01772e-85	0.185639	0.359401
RCCD1	8.82845e-85	0.0985321	0.741927
RPL27	9.76164e-85	0.129458	0.221252
SLC8A3	1.05845e-84	0.0213276	1.65067
FAM89A	1.12569e-84	-0.278318	-2.32675
TSPAN13	1.15676e-84	0.28381	0.55442
MFNG	1.19197e-84	0.0402474	1.26523
APOPT1	1.23625e-84	0.177056	0.403565
POLR2I	1.33078e-84	-0.148685	-0.2513
SPAST	2.07703e-84	0.174631	0.435675
ACOT13	2.09425e-84	-0.206655	-0.666967
ENO1	2.09644e-84	-0.144206	-0.20118
COL2A1	2.21263e-84	-0.265907	-0.740619
SLC38A1	2.66568e-84	0.198963	0.403008
HADH	2.93291e-84	0.169275	0.341917
KBTBD11	3.38687e-84	0.0972518	0.918722
UBR7	3.51679e-84	0.185507	0.472732
GM16286	3.75861e-84	0.152108	0.31508
MYLIP	3.88069e-84	-0.244913	-2.13612
COL5A1	4.11102e-84	-0.21691	-1.01132
POLR2B	4.29304e-84	0.170031	0.388206
PTEN	4.40209e-84	0.189465	0.400003
ACVRL1	4.65069e-84	-0.549997	-4.79779
WDR1	5.40164e-84	-0.222214	-0.593657
PDPN	6.39822e-84	-0.23168	-1.33579
CALM2	6.52327e-84	0.126917	0.201102
YPEL3	6.78078e-84	-0.217094	-0.778703
X9330159F19RIK	9.42402e-84	0.0354257
PLA2G7	1.03353e-83	0.103202	0.797578
GPR85	1.11822e-83	0.0462885	1.20619
TNS2	1.13597e-83	-0.244947	-2.5658
FLNB	1.70565e-83	-0.232457	-0.825731
PADI4	1.96313e-83	0.0139936	2.05296
ZSWIM6	2.05152e-83	0.193442	0.650438
SSBP1	2.24088e-83	0.143906	0.272348
X2310033P09RIK	2.4761e-83	-0.179249
X5730480H06RIK	2.5779e-83	0.147727
DDX25	3.41466e-83	0.112401	0.638488
NXF7	3.75079e-83	-1.12479	-7.17578
X1700019D03RIK	3.80451e-83	-0.234416
RPS24	4.21395e-83	0.0673524	0.0991452
RAB11FIP4	4.25639e-83	0.133141	0.766383
EBF3	5.56658e-83	-0.283836	-2.27578
TBL1XR1	6.26254e-83	0.171689	0.572468
SLC25A39	1.19138e-82	-0.166269	-0.340599
SHB	1.2172e-82	-0.203653	-1.22475
ANXA3	1.37771e-82	-0.24258	-1.57552
NHP2L1	1.4478e-82	0.118307	0.195473
COL1A1	1.51919e-82	-0.349992	-2.77251
UQCRH	1.62594e-82	-0.0979276	-0.135327
MSX1	1.90388e-82	-0.341994	-1.23162
ZFP516	2.0075e-82	0.191246	0.586277
FAM69C	2.17205e-82	0.0412252	1.21777
PCDH19	2.21639e-82	-0.472524	-2.37275
MEIS2	2.21903e-82	-0.304059	-0.517155
DES	2.32194e-82	-0.249031	-1.42153
MAPK1IP1L	3.36224e-82	0.175415	0.37937
NOC2L	3.80099e-82	0.165969	0.378554
PDS5A	4.00817e-82	0.181205	0.399995
LRRC4C	4.38172e-82	0.00515706	2.77744
EHMT1	5.48296e-82	0.172088	0.358195
BMP4	5.9022e-82	-0.357895	-1.7474
ANP32E	7.12009e-82	0.164452	0.317042
HSPB2	7.2068e-82	-0.699952	-4.69349
PARG	8.21776e-82	0.174142	0.468949
ZFP566	8.87687e-82	0.113506	0.629337
FNDC5	9.44942e-82	-0.23463	-2.49557
NUCB1	1.05328e-81	-0.199381	-0.552495
AGO1	1.06291e-81	0.153933	0.608328
ENG	1.19082e-81	-0.584923	-4.02979
NDUFV3	1.2555e-81	-0.156866	-0.270613
THOC7	1.27421e-81	-0.138445	-0.209637
HPN	1.36915e-81	-0.286689	-2.67538
CYB5R1	1.53425e-81	-0.198335	-0.6586
LSM3	1.58093e-81	0.127628	0.241276
SEPT1	1.758e-81	0.120762	0.720077
LEMD1	1.81933e-81	0.0429565	1.24488
PCSK2	1.98363e-81	0.0413344	1.31912
XPNPEP1	2.3673e-81	-0.175157	-0.409206
LUM	2.37296e-81	-0.83064	-4.33802
ARF4	2.57978e-81	0.158889	0.309377
CLNS1A	2.58003e-81	0.138404	0.27288
WFDC21	2.62238e-81	-1.39306	-8.48412
NCAPD2	2.92549e-81	0.1859	0.488811
MTX2	2.93324e-81	-0.161898	-0.311726
CAPN6	3.50352e-81	-0.314432	-1.72766
X2900026A02RIK	3.71246e-81	0.0895282
TFAP2A	4.18762e-81	-0.285721	-1.47093
TMEM28	4.39886e-81	0.0577317	1.0581
TOMM70A	4.67986e-81	0.161921	0.331824
CAPSL	5.9032e-81	-0.282588	-2.54117
IQCB1	6.38453e-81	0.160425	0.513638
MDGA2	1.11999e-80	0.0121441	2.21469
SKAP2	1.172e-80	-0.216076	-0.823592
EXOSC3	1.3029e-80	0.172222	0.37146
ZFP41	1.41489e-80	0.125683	0.670022
TTC5	1.58106e-80	0.184921	0.485139
APOOL	1.77284e-80	0.192867	0.501692
RAP2C	1.78239e-80	-0.22151	-0.650249
SP4	2.01274e-80	0.0942862	0.736014
CDK18	2.29056e-80	-0.189438	-1.72945
USP10	2.53483e-80	0.169193	0.35649
SCARF2	2.76606e-80	-0.268783	-2.78621
ANKRD45	2.87478e-80	0.0419752	1.21229
FOXP2	3.36656e-80	-0.303913	-2.38562
CELF1	3.66569e-80	0.164606	0.336706
AP2S1	4.86995e-80	-0.145516	-0.2769
GPN3	4.90577e-80	0.172322	0.421091
IPO7	4.91076e-80	0.175862	0.382527
NKD1	5.30651e-80	-0.261052	-0.772791
KNL1	5.35473e-80	0.203506	0.514396
GART	5.71039e-80	0.146382	0.295336
HADHA	5.78033e-80	-0.173378	-0.418347
RNF219	5.80438e-80	0.180902	0.419581
PPT1	5.99245e-80	0.141463	0.551555
IFITM3	6.71082e-80	-0.27419	-0.795731
GSTM7	7.02384e-80	-0.236277	-2.68701
ACOT9	8.0462e-80	-0.191484	-0.931271
FGFR3	8.26205e-80	-0.203559	-1.67104
LONRF2	8.89964e-80	0.0178099	1.75296
MAPK8IP1	9.41078e-80	0.144752	0.702888
SLC4A8	1.21015e-79	0.0452676	1.13038
TMEM2	1.21654e-79	-0.225965	-0.681261
RPP30	1.2962e-79	0.166685	0.374277
NPHP1	1.39033e-79	0.128007	0.685647
FAM57B	1.44023e-79	0.0979122	0.756456
SLC35G1	1.55134e-79	0.104766	0.815982
PIAS2	1.68829e-79	0.150189	0.498797
CREB3L1	1.68829e-79	-0.264362	-2.24161
SNRNP200	1.73943e-79	0.180003	0.394583
DUSP27	1.9161e-79	-0.48144	-4.82762
EBPL	1.98462e-79	-0.18467	-0.482394
UHRF2	2.15728e-79	0.17969	0.370854
RIMKLB	2.27097e-79	0.137641	0.654362
TFAP4	2.51031e-79	0.14712	0.629058
X6720427I07RIK	2.75432e-79	0.110773
CHEK2	2.88422e-79	0.158814	0.559864
GM20604	3.11189e-79	0.1307	0.553694
BRINP2	3.19208e-79	0.0128282	2.12377
PMP22	3.21095e-79	-0.376353	-1.48102
ITGB8	3.33852e-79	0.0536517	1.16279
FAM184A	3.61691e-79	0.0733212	0.95105
ORC6	3.92717e-79	0.166506	0.330115
MAP1LC3B	4.12842e-79	-0.146782	-0.276628
FTH1	4.56949e-79	-0.143943	-0.215913
CSDE1	4.92909e-79	0.162223	0.318771
HSPA4	5.15661e-79	0.150828	0.274966
CAR10	5.27179e-79	0.032043	1.50781
CAPRIN1	5.37986e-79	0.170114	0.314388
EIF3K	7.78317e-79	-0.11756	-0.173612
RABGGTB	1.3288e-78	0.185093	0.404981
PTGFR	1.47748e-78	-0.435658	-3.93599
TOM1L1	1.60967e-78	0.132663	0.662624
GABRA4	1.61425e-78	0.045994	1.18036
LYPD2	1.68544e-78	-0.361116	-3.0258
SMEK2	1.81383e-78	0.176118	0.413886
TAB2	1.85305e-78	0.181589	0.433653
OIP5	1.95499e-78	0.133006	0.568297
PDHA1	1.97833e-78	0.18628	0.390212
TOMM5	2.26437e-78	0.148993	0.276035
TRIM24	3.33041e-78	0.180554	0.445445
EEF1AKMT1	3.34088e-78	-0.159812	-0.317727
TDG	3.97811e-78	0.16124	0.350607
NGFR	4.79199e-78	-0.423705	-3.32737
MFSD14A	4.99638e-78	0.169259	0.495442
BSPRY	5.2926e-78	-0.268582	-2.83071
RERE	6.19624e-78	0.170254	0.392475
RASL11A	6.57958e-78	0.225005	0.559222
PDLIM2	7.25035e-78	-0.210343	-1.10571
GRHL2	8.27573e-78	-0.251147	-2.145
DHRS7	8.48431e-78	-0.175988	-0.993587
PXDC1	8.9896e-78	-0.377423	-3.27302
FZD4	1.00397e-77	0.094752	0.924167
ZIC3	1.15506e-77	-0.184115	-0.65749
MYL1	1.15698e-77	-0.835095	-7.20458
DLG1	1.1625e-77	0.189826	0.54858
HOXA3	1.46158e-77	-0.584894	-6.24307
FKBP7	1.4724e-77	-0.180387	-1.59186
RARB	1.56368e-77	-0.217387	-1.33958
SNCB	1.74835e-77	0.0365301	1.32162
PDE3B	1.97398e-77	0.140264	0.59835
NLK	2.40006e-77	0.169131	0.512388
POLR2F	2.62084e-77	0.124148	0.215619
ABLIM1	2.65272e-77	0.169052	0.697092
SRF	2.85371e-77	-0.199734	-0.646093
MAPK6	3.07774e-77	0.171969	0.421889
SMS	3.72287e-77	0.198377	0.320344
AFP	3.75081e-77	-2.80806	-8.27762
HSPA5	4.24083e-77	-0.163045	-0.257827
ZFHX2	4.4339e-77	0.148407	0.669268
SLC6A15	4.90488e-77	0.0155586	1.85362
E2F3	5.50356e-77	0.1656	0.485471
PTS	6.64971e-77	0.16495	0.482184
SYTL2	7.11303e-77	0.00850034	2.48546
SPIN2C	7.27108e-77	-0.249801	-0.954874
GPBP1	1.01e-76	0.174875	0.367954
PTPN4	1.11526e-76	0.0954157	0.719397
GMFG	1.15028e-76	-0.204278	-1.12686
ISOC1	1.17395e-76	0.196941	0.427638
ADAM12	1.17828e-76	-0.4541	-4.13798
HSPA8	1.21842e-76	-0.11643	-0.162878
ARHGEF9	1.23049e-76	0.0485508	1.1012
PCBP4	1.71612e-76	-0.152344	-0.228881
PAPD5	2.06862e-76	0.136869	0.553089
SENP8	2.1397e-76	0.111421	0.534792
CYB5R4	2.56647e-76	0.156635	0.421251
ATP5D	2.69169e-76	-0.114348	-0.172243
CAMSAP3	3.40709e-76	0.0938607	0.801104
NDFIP1	3.4866e-76	-0.184049	-0.737904
EDNRB	3.95251e-76	-0.269919	-2.47495
CRYGB	4.04293e-76	0.00550367	2.94035
CSTF3	4.20256e-76	0.167553	0.407998
BARHL1	4.36841e-76	0.00992261	2.62668
POU2F2	4.45697e-76	0.0425293	1.27207
NUP62CL	4.77081e-76	0.0741695	0.954441
SLC38A2	4.93305e-76	0.186917	0.362959
TMSB4X	5.71817e-76	0.336344	0.448569
BRCA2	5.80995e-76	0.180916	0.453959
WASF1	5.99408e-76	0.170093	0.507971
UBQLN2	6.72752e-76	0.181827	0.390066
SAMD1	8.28087e-76	0.184498	0.453919
TMTC4	8.30971e-76	0.101596	0.781134
CTSC	1.11098e-75	-0.252911	-1.71657
ITGA3	1.23266e-75	-0.235187	-1.92842
ZC3H14	1.37943e-75	0.161412	0.361534
LIPG	1.44586e-75	0.0111649	2.13271
ATF2	1.48863e-75	0.16048	0.422964
SLX4IP	1.6298e-75	0.117002	0.582181
ATP2B4	1.81013e-75	-0.190132	-1.69177
TRP53	1.8259e-75	0.167221	0.352381
DDOST	1.89654e-75	-0.141539	-0.252567
ARID3C	2.48458e-75	0.0188415	1.71833
TIMM8B	2.92002e-75	-0.131172	-0.20344
MED31	3.02744e-75	0.180958	0.404776
PATJ	3.0939e-75	-0.195457	-1.41396
TUNAR	4.00069e-75	0.054753	1.08838
KHDRBS1	4.04196e-75	0.142927	0.274574
X1700021F05RIK	4.1387e-75	-0.184933
X2610528J11RIK	4.71118e-75	-0.757087
ASH1L	4.77048e-75	0.179365	0.459226
MPPED2	4.87086e-75	-0.252516	-0.696943
PRKAG2	5.53156e-75	0.110772	0.651321
SLC9B2	5.95706e-75	0.0288231	1.28911
RFXAP	6.57006e-75	0.161008	0.382514
MAP2K6	6.87526e-75	0.19985	0.527889
NLGN2	6.88894e-75	0.0907511	0.748621
CENPM	7.28633e-75	0.194987	0.416787
PGF	7.83219e-75	-0.287288	-2.18806
TIGD2	8.44592e-75	0.145869	0.538339
MYLK	8.49566e-75	0.0954959	0.810284
EIF2S3Y	8.83452e-75	0.175558	0.610544
SORCS1	9.86714e-75	0.0105402	2.15782
ZHX1	9.86915e-75	0.131108	0.662862
X1600014C10RIK	1.12047e-74	0.0506283
ABCG2	1.27132e-74	-0.207429	-0.531369
LSM2	1.29724e-74	0.128097	0.237418
NRP1	1.35822e-74	-0.256282	-1.17277
OXCT1	1.46354e-74	-0.212672	-0.733565
CAR12	1.4826e-74	0.0611113	1.00949
FBXO45	1.58531e-74	0.119558	0.548473
THNSL1	1.92277e-74	0.0671142	0.939204
GABRG2	2.09703e-74	0.000438348	5.55379
ZFP612	3.16166e-74	0.108191	0.68409
ATXN2L	3.26945e-74	0.172778	0.407043
S100A16	3.29722e-74	-0.2826	-2.44121
AGAP1	3.30725e-74	0.182425	0.522477
EXOC4	3.32729e-74	0.157311	0.484149
ATP5G3	3.47703e-74	-0.117871	-0.172097
HTATIP2	3.69106e-74	-0.16047	-1.39188
IMPA2	3.87067e-74	-0.182305	-0.790737
FGFRL1	3.98055e-74	0.116436	0.705622
PTCHD4	4.02944e-74	0.0141836	1.89438
GM10020	4.6366e-74	-0.196623	-0.496249
RAPH1	4.74672e-74	0.199258	0.508336
SPIN4	4.80394e-74	0.0362648	1.24883
MIS18BP1	5.25333e-74	0.220692	0.508099
DPY30	5.40799e-74	0.12404	0.236511
LIN9	6.28695e-74	0.124609	0.575797
RIMS1	6.32419e-74	0.0164244	1.74679
LAMTOR4	6.39321e-74	-0.156595	-0.317776
KLHL7	6.80796e-74	0.117276	0.607703
GCLC	7.49367e-74	0.16015	0.451679
NUBPL	7.51432e-74	0.153827	0.448386
SLC31A2	8.26382e-74	-0.186651	-1.32117
GM42418	9.96683e-74	-0.44601	-0.847175
LCORL	9.97936e-74	0.152556	0.632546
FAM81A	1.15221e-73	-0.238254	-2.4307
SULT4A1	1.21445e-73	0.0735405	0.876501
DAAM2	1.32855e-73	-0.247242	-2.78708
KDM3A	1.34147e-73	0.16675	0.581301
CEP162	1.34547e-73	0.110858	0.667479
CHCHD1	1.42241e-73	0.118677	0.221697
MAP3K9	1.56686e-73	0.0456866	1.10673
EXOC3L4	1.66894e-73	-0.4767	-3.54554
GRN	1.79979e-73	-0.186702	-0.777801
PSMC3IP	1.9203e-73	0.160913	0.396061
TBP	2.02402e-73	0.123957	0.544057
USP22	2.32414e-73	0.158161	0.399499
API5	2.54946e-73	0.158279	0.341514
HES3	2.61517e-73	-0.21475	-0.935897
CLP1	3.0995e-73	0.134632	0.438576
GABARAP	3.13799e-73	-0.146116	-0.252165
NDUFB6	3.676e-73	-0.139909	-0.245975
FBXO32	4.09524e-73	0.0510576	1.04671
ZC2HC1A	4.28123e-73	0.130801	0.58295
ARVCF	4.49423e-73	0.130354	0.705593
SASH1	4.5859e-73	-0.188737	-0.594963
BATF	4.71833e-73	-0.244696	-2.6652
ETV4	4.74388e-73	-0.207995	-1.73278
CLDN4	4.74388e-73	-0.646442	-4.80676
X1700025G04RIK	5.18467e-73	0.152785
NAA30	5.37732e-73	0.0977197	0.467484
PTPRS	5.53931e-73	0.170551	0.459582
INSM1	6.13736e-73	0.0157031	2.01959
EIF4A2	6.72193e-73	0.16709	0.361167
KRTCAP2	7.07867e-73	-0.125966	-0.188638
KIFC3	7.10152e-73	-0.186278	-2.13105
LITAF	1.0547e-72	-0.19853	-0.549704
HBP1	1.05739e-72	-0.185101	-0.553493
ENDOG	1.19897e-72	-0.184952	-0.588362
RPS10	1.33231e-72	0.0658237	0.0966064
RALGPS2	1.40445e-72	0.211581	0.432552
E130308A19RIK	1.42773e-72	0.154489	0.540612
MAD2L1	1.46684e-72	0.159251	0.36812
PNO1	1.4728e-72	0.146774	0.307897
B230217C12RIK	1.5277e-72	0.0796299	0.806836
PDE10A	1.59257e-72	0.0367039	1.2524
BAK1	1.83574e-72	-0.182195	-0.485135
RPL13-PS3	1.92462e-72	0.140176	0.272259
NDUFB7	2.10492e-72	-0.120053	-0.201613
DIS3	2.41918e-72	0.159836	0.385484
FXYD6	2.49927e-72	0.247726	0.458323
CCDC85B	2.55601e-72	-0.19055	-0.712058
GRHPR	2.5672e-72	-0.161675	-0.316027
CDK4	3.21484e-72	0.0979673	0.158319
NBEA	3.29416e-72	0.114898	0.649978
FTX	3.32772e-72	0.0753307	0.791446
ZBTB33	3.61175e-72	0.108104	0.642163
FAT1	3.61868e-72	0.159491	0.531417
PLEKHG3	3.90138e-72	-0.179041	-1.13091
GSTK1	3.9842e-72	-0.156841	-1.52925
ZRANB3	4.14664e-72	0.119346	0.63112
CADPS	4.55633e-72	0.0310873	1.33903
DCUN1D1	4.59258e-72	0.179118	0.423471
PPP1R14B	4.60032e-72	-0.104625	-0.14172
NECTIN1	5.08125e-72	0.170408	0.574657
LIMCH1	5.45068e-72	-0.243372	-1.48413
SV2B	5.85414e-72	0.00490735	2.86812
CCDC88A	5.98522e-72	-0.203355	-0.435204
UNC119	6.46224e-72	0.17811	0.400769
AHCYL2	7.48412e-72	0.122656	0.610218
SLC25A36	7.82308e-72	0.166979	0.526864
ZIC2	8.30848e-72	0.210203	0.600183
PPP4C	8.39214e-72	0.16648	0.359564
TCF3	9.56537e-72	0.160232	0.34078
CHN2	1.07557e-71	0.0520757	0.914105
PXMP4	1.09473e-71	-0.149394	-1.07208
FAM169B	1.20126e-71	-0.440963	-4.74489
TXN1	1.3432e-71	0.101495	0.174717
RFTN2	1.35175e-71	-0.249668	-2.67157
EXO1	1.52581e-71	0.180561	0.426687
CCDC102A	1.54225e-71	-0.182083	-0.821894
USP28	1.75851e-71	0.127676	0.604426
BAZ2B	1.82127e-71	0.193953	0.462677
ILK	1.91365e-71	-0.185081	-0.439541
SLCO5A1	2.47988e-71	0.0490889	1.12531
ZFP334	2.76462e-71	0.131727	0.542331
RNF4	3.21742e-71	0.17609	0.3978
RPS27	3.23718e-71	-0.106857	-0.157305
NAA38	3.37317e-71	-0.150031	-0.319983
TMPO	3.54147e-71	0.133445	0.267919
GPC4	3.75916e-71	0.0686724	0.982902
PPA1	3.79297e-71	0.129199	0.227929
NKAP	4.02603e-71	0.147081	0.366228
TOMM7	4.29019e-71	-0.121319	-0.171366
TRP53INP1	4.32433e-71	0.0542205	1.11416
ATOH8	4.4792e-71	-0.170501	-1.36909
MYC	4.50557e-71	0.152287	0.744159
NEK2	5.10781e-71	0.12561	0.573437
GBE1	5.63043e-71	0.0986778	0.652877
OXSR1	5.99832e-71	0.135066	0.501025
RBBP4	6.42453e-71	0.128012	0.236883
SESN3	6.90667e-71	0.183304	0.536063
MLLT11	6.9789e-71	0.130726	0.622594
PIGX	7.59746e-71	0.150286	0.321074
TSPAN18	8.05519e-71	-0.23309	-0.974548
EML5	8.24454e-71	0.0597154	0.991211
ZFP397	9.5106e-71	0.149207	0.492947
MRPL50	9.54186e-71	0.14821	0.338219
SERF2	9.64186e-71	-0.0856229	-0.132158
TTBK1	1.02752e-70	0.0116046	2.02111
GSK3B	1.11257e-70	0.161076	0.330452
PIKFYVE	1.5001e-70	0.129268	0.573045
RNF220	1.5001e-70	-0.162542	-0.400149
FOXP4	2.04948e-70	-0.193598	-0.572285
ADARB2	2.10952e-70	0.00319096	3.11197
CISD2	2.14573e-70	0.144345	0.296207
WRB	2.26883e-70	0.15427	0.418964
NR2C2	2.40913e-70	0.133454	0.526518
UBN2	2.86778e-70	0.167927	0.370988
IL17D	2.93634e-70	-0.184434	-1.84237
NUDT9	3.08209e-70	-0.176877	-0.482808
SETX	3.6448e-70	0.15797	0.438669
TRAPPC2L	3.91283e-70	-0.152176	-0.329694
GIPC2	4.04043e-70	-0.520743	-3.78493
[truncated: 12,419 more rows]

## Sheet: PhenoGraph cluster 2
gene	P-value (FDR adjusted)	MAST Hurdle	logFC
MEST	0	2.02186	1.7664
LMO4	0	1.26229	1.90509
ID1	0	1.23971	2.04295
CITED2	0	1.11237	1.43904
PKDCC	0	0.866055	1.43786
ID2	0	0.859902	1.49244
ID3	0	0.831588	1.20332
TWIST1	0	0.815065	2.33468
ZFP593	0	0.781576	1.32065
ZEB2	0	0.768125	1.20141
TCF12	0	0.74878	1.30836
NRIP1	0	0.695776	1.73545
E130012A19RIK	0	0.677642	1.09233
TMED5	0	0.661911	1.1796
CHCHD4	0	0.66055	1.04749
TRAF4	0	0.654033	1.26769
PTBP3	0	0.652053	1.47335
TMSB4X	0	0.648884	0.968512
IER5L	0	0.626705	1.42278
PPFIBP1	0	0.617214	1.54365
OST4	0	0.615425	0.993429
NRP2	0	0.614694	1.33504
SOX9	0	0.595602	2.67205
PSAT1	0	0.585352	0.984723
DNAJC1	0	0.574682	1.65842
PFN1	0	0.572988	0.879568
FIGN	0	0.554205	1.52962
IFRD1	0	0.54396	1.03131
NR2F1	0	0.530853	4.11709
MRPS6	0	0.52518	0.856168
COTL1	0	0.524487	1.36308
KTI12	0	0.511172	0.926225
UBL3	0	0.508096	1.47649
SRM	0	0.507511	0.800148
NREP	0	0.506437	1.33505
NME4	0	0.50641	0.929157
MTAP	0	0.488046	0.873475
CDC42SE1	0	0.472072	1.23376
TES	0	0.467783	1.97551
TIMM10B	0	0.456664	0.967579
RAP2B	0	0.456521	1.36263
MEF2C	0	0.445619	3.46436
SEPT9	0	0.442607	0.967917
AKT1	0	0.440012	1.0688
RSL24D1	0	0.438927	0.771312
UCK2	0	0.438507	0.782432
VASP	0	0.427731	1.00612
PSMD10	0	0.422572	1.00586
LITAF	0	0.422175	1.29559
SUB1	0	0.41898	0.640976
MAK16	0	0.402887	0.722811
GRRP1	0	0.401843	2.36668
CNBP	0	0.400322	0.636669
PA2G4	0	0.399557	0.650142
NIP7	0	0.39275	0.715251
SLC25A5	0	0.384752	0.634451
ALYREF	0	0.383108	0.657461
TOMM5	0	0.381535	0.635085
DLC1	0	0.378398	2.85938
RSL1D1	0	0.377133	0.633982
FAM96A	0	0.365925	0.711454
SRP14	0	0.365089	0.591462
GAP43	0	0.36416	2.74426
ITGA6	0	0.354326	1.39237
PAX3	0	0.35358	2.9053
CACYBP	0	0.351486	0.565077
USP25	0	0.344472	1.21363
POLR2F	0	0.342397	0.556009
MBNL2	0	0.337032	1.9713
DNAJA2	0	0.334605	0.577765
IGSF3	0	0.327043	2.11101
POLR1D	0	0.323006	0.515239
SNRPF	0	0.321444	0.523277
DAB1	0	0.315834	1.88655
ROBO1	0	0.312691	1.40345
ZSWIM7	0	0.310455	1.24059
NME1	0	0.303261	0.482641
CYCS	0	0.299497	0.483279
MYC	0	0.294956	1.95846
LSM2	0	0.286965	0.479618
NHP2L1	0	0.28042	0.428265
FAM212A	0	0.278922	4.1727
HMCN1	0	0.27419	2.99462
GNG12	0	0.270132	1.72125
PLP1	0	0.26973	4.45425
EIF5A	0	0.269064	0.405817
PCDH18	0	0.261264	1.5327
MDFI	0	0.253935	2.25019
EMILIN1	0	0.251428	1.88794
SSBP4	0	0.249402	1.51408
GADD45A	0	0.246616	2.86976
GPC1	0	0.230986	1.31502
KLHL21	0	0.223639	1.7359
COL1A2	0	0.221047	3.55283
MCC	0	0.202509	2.70614
SNAI1	0	0.200987	3.04828
S1PR2	0	0.198295	1.5603
PPP1R18	0	0.189956	1.86195
TMEM37	0	0.187733	2.02213
PXN	0	0.187189	1.62467
MSX2	0	0.170742	2.12847
ARHGEF26	0	0.170178	1.6347
FOXO1	0	0.166317	1.73548
SOX5	0	0.162354	2.62454
RGS3	0	0.162312	1.77651
ETS1	0	0.162215	5.16377
CNP	0	0.147127	2.14988
PCDH1	0	0.142851	1.66312
ELK3	0	0.134798	1.60366
NPR3	0	0.132777	2.53206
TFAP2A	0	0.132185	4.24132
EDNRA	0	0.131876	2.1385
SPECC1	0	0.130144	1.97743
RASA3	0	0.129669	3.43238
FBLN2	0	0.128923	2.47951
RBMS3	0	0.126134	2.4423
COL9A1	0	0.120681	2.19762
PHACTR1	0	0.119379	4.63342
SDC3	0	0.11934	3.37705
TMC6	0	0.116852	2.34765
DIXDC1	0	0.102336	1.9487
ITGA8	0	0.0945834	2.14444
SSFA2	0	0.090813	2.21279
CDC42EP1	0	0.0885624	2.24997
BMF	0	0.0790029	2.11099
PLCG2	0	0.0788271	3.55367
RHOJ	0	0.0782827	1.2338
PCYT1B	0	0.0704157	2.12503
ENPP2	0	0.0672727	2.25623
CDK18	0	0.066102	2.38909
TFAP2C	0	0.0652135	2.64035
GFRA2	0	0.0589118	2.55598
ERBB3	0	0.0576249	4.29567
TNIK	0	0.0526042	4.12084
TRIM62	0	0.0519711	2.64982
LAMA4	0	0.0497965	2.54709
APOBEC2	0	0.045179	2.61858
EDNRB	0	0.0451299	3.97018
PLXNA4	0	0.0425171	4.03382
FAM81A	0	0.0398883	3.37705
PXDC1	0	0.0386497	3.43321
FOXD3	0	0.0366845	5.80019
ITGA4	0	0.0346441	4.61188
RGCC	0	0.0335351	3.57592
PPP2R2B	0	0.0306761	4.13444
L1CAM	0	0.0273153	3.80622
TFAP2B	0	0.0256773	7.40589
ADAM12	0	0.0236011	3.59795
CAMK2B	0	0.0199509	3.74337
SOX10	0	0.0177557	7.60936
APOD	0	0.0165965	4.55511
NGFR	0	0.0163216	5.81844
LAPTM5	0	0.0130818	4.11085
DLX2	0	0.012297	6.4468
GM12688	0	0.0110531	5.16247
LUZP2	0	0.00836958	4.93878
LECT1	0	0.0080794	3.8968
LGI4	0	0.00612363	4.84037
DLX1	0	0.00419091	5.39285
CMTM5	0	0.00353813	6.31855
CCL6	0	0.00225286	6.37013
ANXA1	0	0.00209092	7.49409
CDH19	0	0.00130593	7.54497
FTL1	0	-0.224692	-0.321442
TECR	0	-0.324945	-0.558563
GPX4	0	-0.378298	-0.592696
RTN3	0	-0.406757	-0.710244
NIPSNAP1	0	-0.41648	-0.943967
WBP5	0	-0.438144	-0.707486
MAPK3	0	-0.446499	-0.968332
GSR	0	-0.447799	-1.3053
RBBP9	0	-0.463605	-1.70386
H1FX	0	-0.472507	-0.769947
COMMD3	0	-0.48117	-1.2792
WLS	0	-0.498711	-0.925425
SORT1	0	-0.508361	-2.38042
ARID3B	0	-0.514009	-1.30411
GREB1L	0	-0.516239	-1.26127
BOK	0	-0.525808	-1.70808
GM1673	0	-0.525958	-1.04644
PLP2	0	-0.525982	-1.73078
TEAD2	0	-0.529429	-0.873818
MARCH9	0	-0.535384	-2.12322
ZDHHC12	0	-0.540893	-2.09581
WDR86	0	-0.54186	-2.11569
CXADR	0	-0.542617	-1.74271
SALL4	0	-0.553335	-1.13683
SHROOM3	0	-0.564593	-2.48812
PROM1	0	-0.567879	-2.13689
FAM213A	0	-0.572499	-1.37841
BICD1	0	-0.573364	-2.33211
ABLIM1	0	-0.573391	-2.03088
HOOK1	0	-0.586221	-2.07023
DDR1	0	-0.588325	-2.59392
TSPAN13	0	-0.592524	-1.53585
LY6E	0	-0.593507	-1.68426
TMEM88	0	-0.63885	-2.39667
AKAP12	0	-0.641004	-1.81167
FGFR1	0	-0.64386	-1.38088
LAMA1	0	-0.647005	-2.97301
PLEKHA7	0	-0.647095	-3.04316
GNAI2	0	-0.647176	-1.01745
EPB41L3	0	-0.650104	-2.23057
PALLD	0	-0.652458	-1.82137
COL4A1	0	-0.657629	-1.51158
TENM4	0	-0.65902	-1.7286
DPYSL5	0	-0.660463	-2.57514
NAV2	0	-0.66258	-2.39111
AES	0	-0.667633	-1.69542
CXXC4	0	-0.673445	-2.86127
NUAK2	0	-0.674486	-3.07415
TUBB4A	0	-0.680585	-3.08363
PLCH1	0	-0.689533	-3.03767
MYCL	0	-0.690624	-2.58764
CD24A	0	-0.697558	-1.25975
SPINT2	0	-0.710537	-2.15525
FHL1	0	-0.712538	-2.28303
CAR14	0	-0.71927	-2.06909
GSTA4	0	-0.728727	-1.56964
BEX1	0	-0.744351	-1.16411
TRP53I11	0	-0.748558	-3.04007
KIF21A	0	-0.751818	-1.98051
CKB	0	-0.752689	-2.61741
HSD11B2	0	-0.761129	-2.68911
TOX3	0	-0.771475	-2.27749
COL18A1	0	-0.782724	-2.56969
ACER2	0	-0.789695	-1.96337
LRP2	0	-0.793078	-2.9309
RGMA	0	-0.793329	-2.52028
PKP2	0	-0.798738	-3.8413
FOXP1	0	-0.800424	-2.89412
IGFBPL1	0	-0.80268	-2.76211
AFDN	0	-0.805526	-2.23838
LPAR1	0	-0.806097	-3.74398
GRB7	0	-0.810542	-4.10722
CGNL1	0	-0.813713	-2.96673
PTCH1	0	-0.818573	-2.16399
DUSP9	0	-0.830045	-2.1639
UCHL1	0	-0.849352	-2.77807
PDGFA	0	-0.851437	-2.49238
PTH1R	0	-0.852375	-3.53787
SPARC	0	-0.866881	-2.13204
CHCHD10	0	-0.880872	-2.66557
MAP1B	0	-0.885232	-1.77152
ZFP503	0	-0.897567	-2.482
ARL4C	0	-0.899745	-3.14267
IRX3	0	-0.900427	-1.95178
CLU	0	-0.906692	-4.37161
ZIC3	0	-0.914013	-3.15974
SMOC1	0	-0.918111	-3.65302
PODXL	0	-0.920884	-3.40367
CDKN1C	0	-0.921117	-2.02016
GPC3	0	-0.929807	-1.92423
IRX5	0	-0.951354	-2.28102
MEIS1	0	-0.980255	-3.44413
SLC2A1	0	-0.994847	-1.61159
RBM24	0	-1.01297	-3.90577
IRX1	0	-1.05114	-3.5451
SOX3	0	-1.07666	-2.94425
IGFBP2	0	-1.08391	-2.63429
SLC2A3	0	-1.09527	-2.21073
SOX2	0	-1.10907	-2.24718
ERAS	0	-1.15433	-4.06658
POU5F1	0	-1.16078	-2.95468
SMARCD3	0	-1.17158	-4.59619
IGFBP5	0	-1.188	-3.0567
UPP1	0	-1.22923	-4.80414
SOX1	0	-1.24856	-4.46356
SOX21	0	-1.30036	-3.95919
CYP26A1	0	-1.32158	-5.70737
APOE	0	-1.32842	-3.42807
KRT18	0	-1.35562	-3.29413
OTX2	0	-1.35693	-3.28686
IFITM1	0	-1.39494	-3.4896
APLNR	0	-1.4047	-6.13407
FOXB1	0	-1.42181	-5.02318
HOXB2	0	-1.42251	-4.91725
MYL7	0	-1.44221	-4.3413
PHLDA2	0	-1.45661	-3.02722
FST	0	-1.72677	-3.71936
HOXA1	0	-1.75729	-6.40361
ALDH1A2	0	-2.07544	-6.55782
EPCAM	3.51678e-307	-1.272	-3.03648
PIM2	7.06586e-307	-1.03883	-3.57559
RALGPS2	1.48111e-306	-0.42594	-1.02676
HRAS	1.58402e-306	-0.318047	-0.555783
SNRPN	4.79292e-306	-0.4578	-0.854591
BEX4	8.68985e-306	-0.531613	-0.844854
CDC26	8.75604e-306	0.348723	0.61385
NOL7	9.42497e-306	-0.314478	-0.543608
YWHAB	1.12589e-305	0.271462	0.435445
NOP10	1.68755e-305	0.30179	0.478131
EEF1E1	7.2525e-305	0.431949	0.758029
SFRP1	9.44435e-305	-0.538772	-0.988851
FBLN1	3.57083e-304	-0.464859	-0.999623
GM2694	4.83532e-304	-0.76754	-2.412
MCAM	4.63036e-303	0.0242274	2.89339
FAM208B	6.05621e-303	0.458274	1.05695
HOXB1	1.59495e-302	-1.44371	-5.30641
GINS2	1.14961e-301	-0.360125	-0.700288
HSPA4L	1.55384e-301	-0.598219	-2.47872
NECTIN3	1.6109e-301	0.476654	0.880363
TOMM20	1.6109e-301	0.234637	0.364563
HADH	6.01453e-301	-0.347918	-0.712208
CAMSAP3	1.9004e-300	-0.683414	-3.53069
MTCH1	1.88504e-298	-0.341681	-0.614669
PHGDH	3.2933e-298	-0.416779	-0.770552
X0610040J01RIK	9.42905e-298	0.04402
GATA6	2.22708e-296	-1.54574	-5.05856
NTN1	2.59321e-296	-0.710058	-3.99824
PLPP3	1.2455e-295	-0.555732	-1.75858
INPP4B	1.35423e-295	0.00641548	3.91473
PPID	7.73056e-295	0.316692	0.55088
TIMM10	2.13055e-293	0.393041	0.713806
HSPB1	7.17273e-293	-1.12315	-5.98484
WDR12	2.04644e-292	0.404968	0.726074
FOXC2	3.57607e-292	-1.35084	-4.46083
RCL1	1.16483e-291	0.424632	0.791424
DAPK1	1.47008e-291	-0.481757	-1.78606
STRA6	5.3287e-291	-0.758781	-3.57212
GM11639	1.14802e-290	0.00185137	5.27411
BHLHE23	2.20775e-289	0.000280738	7.85705
EPB41L5	2.85843e-289	-0.448996	-1.32624
LDHA	4.49489e-289	0.249904	0.378877
HES3	8.46055e-289	-1.58363	-4.75626
PARK7	3.47148e-288	-0.255144	-0.388044
SYT11	5.76332e-288	-0.653204	-2.32645
MATN1	2.0085e-286	0.0010437	6.09609
FGF8	2.13186e-286	-1.07261	-3.23179
CHIC2	2.42128e-286	0.377009	0.663134
CELA1	8.73026e-286	0.0207664	2.89885
CMTM8	8.73026e-286	-0.631766	-1.88547
ADD3	3.00933e-285	-0.493379	-1.1727
ARL4A	7.57901e-284	-0.706159	-2.12528
PTN	1.6546e-283	1.97888	1.40341
SMTNL2	3.93571e-281	-0.529682	-2.09714
KIF19A	1.5567e-280	0.00707804	3.90099
DCTD	3.2953e-280	0.395927	0.931898
ECI1	3.95448e-280	-0.489409	-1.78054
H19	4.05493e-280	-0.866227	-1.73611
MPG	4.68131e-280	0.385263	0.841601
HSPD1	6.97102e-280	0.27509	0.422767
PDGFRA	2.08684e-278	0.31565	0.676877
EMC6	1.54996e-277	0.280225	0.493192
BST2	2.10007e-277	-0.611969	-2.50307
IL11RA1	8.33061e-277	0.206449	1.37672
CSRP2	9.4489e-277	-0.634698	-1.13816
CFL1	2.27518e-276	0.203388	0.331583
BCAM	4.38169e-276	-0.619038	-2.42366
FGFRL1	9.79346e-276	-0.57635	-2.63339
PAX7	1.17061e-273	0.0729657	2.09855
ILDR2	1.8583e-273	-0.735418	-2.21069
LGI2	2.59223e-273	-0.599339	-2.86013
DSP	3.06033e-273	-0.709747	-2.91798
MCTS1	4.32471e-273	0.347917	0.681624
MAP4K4	5.10818e-273	0.395563	0.693175
CDH1	9.52938e-272	-1.01019	-3.97342
ALX1	1.02071e-271	0.124455	1.85658
CDH6	2.62768e-271	0.0464537	2.12831
BCAR3	5.75556e-271	0.0988715	1.7426
SLC22A23	6.5048e-271	-0.645905	-3.46069
VEGFB	1.82754e-270	-0.344174	-0.719605
UBE2N	2.64053e-270	0.265179	0.462904
GKAP1	5.96692e-270	-0.403318	-1.02864
STMN2	7.64066e-270	-0.617315	-1.42876
HS6ST1	9.20977e-270	-0.508129	-1.88612
TNS2	7.49673e-269	0.0409372	2.23902
RAC1	1.00875e-268	0.27811	0.489716
GDE1	1.36842e-268	-0.352791	-0.891307
DDX21	2.43336e-268	0.413278	0.674064
DKK1	3.66664e-268	-1.07194	-3.8134
LRRC42	5.81656e-268	-0.359803	-0.807281
RAB11FIP1	9.01558e-268	-0.47251	-1.67511
NHS	2.0624e-267	-0.530695	-2.33461
FAM89A	3.14874e-267	0.0583662	1.91015
FRZB	3.54233e-267	-0.603893	-2.69285
MPP6	4.8077e-267	0.364752	0.624319
EIF1A	6.26744e-267	0.32819	0.576137
ACOT1	2.05409e-266	0.292885	1.19308
RASGRP3	4.02153e-266	-1.17432	-5.45083
FN1	4.75496e-266	-0.658881	-1.27045
SPIRE1	5.3313e-266	0.336886	1.09869
FAM104A	6.12234e-266	0.287279	0.495016
X6030407O03RIK	1.63104e-265	0.00285498
LAPTM4B	2.65195e-265	-0.491811	-1.2748
RASSF3	4.42973e-265	0.218266	1.35612
DST	4.96227e-265	-0.509874	-1.26622
ZSWIM6	3.83417e-264	0.339501	1.17934
RELL1	3.91517e-264	0.226129	1.33924
HSPE1	1.40297e-263	0.211291	0.318672
MAX	3.82241e-263	0.428252	0.875878
CDK6	7.14074e-263	-0.569846	-2.41566
FXYD6	7.19227e-263	-0.422001	-0.941304
MYCN	1.27192e-262	0.595323	1.09232
CPE	1.4715e-262	-0.484474	-1.67073
EPHA4	4.07916e-262	-0.621674	-1.62392
RHBDF1	1.42406e-261	0.0675612	1.93391
MFAP4	2.54446e-261	-0.634049	-2.96565
EZR	1.56156e-259	-0.635093	-1.33735
ZFAND5	2.22241e-259	0.391805	0.67872
FGFR2	6.35286e-259	-0.532888	-1.76348
CXCL14	7.51204e-259	0.00896351	3.75971
IGF2	1.5043e-258	-0.795108	-2.06632
NMNAT2	8.33599e-258	0.0517071	2.10801
ARHGEF40	7.41389e-257	0.216277	1.27749
D5ERTD605E	2.34776e-256	0.0224031	2.69124
EBNA1BP2	2.66348e-256	0.30195	0.5517
FABP7	1.58275e-255	0.144025	1.25755
PBX1	7.48879e-255	-0.368124	-0.640952
SLIT3	1.17442e-254	-0.656893	-3.12883
ANK3	2.50112e-254	-0.49856	-1.57963
COX6B2	5.10249e-254	-0.439035	-1.48575
FRAS1	1.03583e-253	-0.565825	-2.94501
RARA	1.68163e-253	0.227779	1.23306
CFC1	3.85487e-253	-1.63372	-8.38317
GBX2	7.81087e-253	-0.882103	-3.2924
DSG2	7.90896e-252	-0.936039	-4.93765
INA	3.38676e-251	0.308082	1.14581
RPS8	4.17779e-251	-0.134394	-0.202432
KCTD1	9.34173e-251	0.246053	1.25819
ISL1	1.99788e-250	-1.31529	-4.85542
PRPF4B	2.77625e-250	0.317309	0.537055
ZBTB16	3.58528e-250	-0.581256	-2.21011
HNRNPF	4.97614e-250	0.260467	0.444284
IRX4	6.31135e-250	0.0258443	2.54893
PPDPF	8.44296e-250	-0.319759	-0.576262
PPA1	1.00036e-249	0.2678	0.453874
POLR2H	4.15312e-249	0.32679	0.583635
PLEKHO1	8.95704e-249	0.410041	0.991771
RPRM	5.08163e-248	-0.797872	-3.72238
NSG2	6.32176e-248	-0.582691	-3.02096
LRRFIP1	1.82565e-247	0.43574	0.95284
VAPA	2.55121e-247	0.254575	0.444644
COL13A1	5.18683e-247	-0.814123	-4.47613
TPD52	6.80557e-247	-0.499782	-1.78249
RBPMS2	6.75669e-246	-0.435121	-1.10341
SNX1	9.98664e-246	0.329653	0.923059
FREM2	7.29275e-245	-0.610517	-2.55662
LLPH	8.77096e-245	0.26771	0.461372
CLDN6	1.1031e-244	-1.58389	-4.85256
CXX1A	2.84657e-244	0.336898	1.08355
BCAP29	3.16543e-244	0.199207	1.29927
DDAH1	5.0835e-244	-0.479038	-1.41385
GRASP	7.70656e-244	0.130902	1.53136
SALL1	1.43634e-243	-0.463595	-1.24776
PRDX2	3.29746e-243	-0.211091	-0.304728
ARAP3	1.12273e-242	0.0667205	1.65441
RPL27-PS3	2.67486e-242	0.26721	0.468532
PJA1	1.38086e-241	0.401292	0.75284
LGALS1	4.48843e-241	-0.496356	-1.25202
KRTCAP3	4.48843e-241	-0.612229	-3.74386
MGST1	2.08539e-238	-0.481309	-1.91674
RAI2	3.37576e-238	0.016758	2.95049
TSEN15	8.46319e-238	0.340789	0.652208
CAR12	1.01797e-237	0.0836956	1.80385
S100A10	1.0604e-237	-0.62898	-1.48818
SYNE2	1.62689e-237	-0.431663	-1.38583
IQGAP2	1.49898e-236	-0.455042	-1.56412
ARG1	2.4629e-236	-1.58188	-5.70794
IRS4	1.63819e-235	-0.991934	-3.0347
PRRX2	6.46571e-235	0.624758	0.941915
GAR1	6.79787e-235	0.296802	0.552659
MKRN1	2.40362e-234	-0.400726	-0.829525
X4930523C07RIK	3.73808e-234	0.0544223
OXCT1	5.4463e-233	-0.448426	-1.51169
FZD4	6.78908e-233	-0.638285	-3.1732
ABRACL	3.80259e-232	0.299738	0.48875
TLN1	1.165e-231	0.4343	0.801856
KIF26A	1.04182e-230	0.0977984	1.67899
PABPC1	2.56233e-230	0.262452	0.444029
NEXN	1.68641e-229	-0.832524	-3.07552
GLDC	2.97489e-229	-0.543347	-1.82272
SLC25A23	3.11556e-229	-0.446276	-2.02902
XRCC6BP1	3.61381e-229	0.312424	0.963611
FTH1	2.07681e-228	-0.270179	-0.417087
BCCIP	2.4304e-228	0.328845	0.617148
GLIPR2	2.4304e-228	-0.593248	-2.41198
APELA	1.53399e-227	-1.22783	-4.96851
CXCL12	1.96467e-227	-0.884375	-3.99809
TAL2	2.8308e-227	-0.982995	-3.97982
CRIP1	5.15623e-227	-0.520528	-1.85884
METRN	1.09789e-226	0.44847	0.959759
DPY19L1	5.43736e-226	0.357917	0.873824
NOP16	5.66053e-226	0.34336	0.647026
SAP30	1.84761e-225	0.475543	0.766747
DDX39	4.77142e-225	0.265163	0.449236
ITGB5	1.09859e-224	-0.443654	-1.47667
SLC9A3R1	1.16065e-224	-0.436191	-0.882844
RBM3	1.17423e-224	0.241086	0.405571
RRS1	3.8114e-224	0.338467	0.616615
CEP85L	8.83437e-224	0.0605548	1.87275
RSPO3	9.26707e-224	-1.56805	-5.59786
MRPS33	1.23162e-223	0.260125	0.4365
RAB11FIP4	1.49477e-223	-0.452692	-1.8529
A430005L14RIK	3.676e-223	0.374239	0.673552
CNTNAP2	4.82607e-223	-0.542472	-2.64276
DACH1	7.14139e-223	-0.603031	-2.48836
RFX4	1.23394e-222	-0.906488	-3.26092
FXYD5	1.56489e-222	0.0243515	2.04367
GFRA1	4.32259e-222	0.018714	2.79384
EMG1	1.05646e-221	0.252603	0.440701
DKC1	1.19699e-221	0.318483	0.554205
ELAVL2	5.83422e-221	-0.452917	-1.39276
DCUN1D5	1.61226e-220	0.266063	0.474878
NIFK	1.86574e-220	0.297634	0.581787
AGTRAP	3.34143e-220	-0.446215	-2.2391
JUND	6.20696e-220	-0.390793	-0.739793
RHPN2	8.00538e-220	-0.604229	-3.45357
NRXN2	1.07428e-219	-0.473536	-1.67736
KLF10	6.43827e-219	-0.471076	-2.35957
GEMIN6	7.93785e-219	0.370441	0.711537
TMEM108	2.10774e-218	-0.577624	-1.84517
TMEM238	2.44954e-218	-0.522068	-2.43361
JARID2	3.53741e-218	-0.419739	-0.817819
IGSF9	4.07515e-218	-0.428128	-1.52152
CPNE5	5.02121e-218	0.145001	1.42971
YAE1D1	1.18363e-217	0.351842	0.635867
RAP2C	1.36291e-216	0.352151	1.03267
PSIP1	1.43652e-216	-0.304581	-0.441529
NHP2	1.55318e-216	0.25847	0.42607
CCDC177	2.00955e-216	-0.603374	-3.2323
PTPRK	2.62129e-216	-0.403498	-1.39511
DYRK3	6.01326e-216	0.25566	1.09584
TMEM55A	2.4797e-215	0.358592	0.869676
CLDN7	9.4759e-215	-1.64374	-4.8489
TRP53	1.74651e-214	0.302709	0.583258
HIGD1A	2.42455e-214	0.280651	0.454061
GM10076	3.00169e-214	-0.481193	-0.751585
VAMP8	5.76682e-214	-0.50472	-1.37471
USP14	7.61238e-214	0.288667	0.548744
ACVRL1	1.88339e-213	0.0334899	1.73313
PARD6B	1.95462e-213	-0.469734	-2.42904
TBX1	3.3973e-213	-1.17511	-4.14962
SERPINF1	4.8295e-213	0.0804162	1.7162
DARS	2.83811e-212	0.323806	0.637623
SP8	3.90902e-212	-0.617337	-2.16872
SCG5	7.82841e-212	-0.573363	-2.78819
GPATCH4	1.56371e-211	0.35753	0.629873
TSEN34	1.82893e-211	0.293541	0.554997
ST5	2.15317e-211	0.104673	1.51103
TNNI1	3.18953e-211	-1.48419	-5.22231
DDAH2	4.25558e-211	-0.348163	-0.650747
X2410016O06RIK	6.27265e-211	0.355242
APBB1	1.77195e-210	-0.374916	-1.26204
MT-ND6	6.13483e-210	0.562229	0.966084
FAM92A	8.41357e-210	-0.30565	-0.653891
CRB2	1.4337e-209	-0.445425	-1.96763
PPP2R5A	4.80371e-209	0.355776	0.868015
CBLN2	1.21522e-208	0.0114673	3.30763
SLAIN1	3.9156e-208	-0.481583	-2.75375
IRX2	5.09368e-208	-0.709309	-2.64335
NSUN2	7.12387e-208	0.289246	0.565297
ZDHHC2	7.23408e-208	-0.387897	-1.48664
NID2	1.31562e-207	0.258439	1.12802
PDZD2	4.54348e-207	-0.684012	-3.81609
EPHB2	4.89166e-207	-0.4299	-1.50231
X2900026A02RIK	7.13567e-207	-0.472632
LHFPL2	1.67655e-206	-0.557729	-2.98036
HPRT	2.62812e-206	0.37909	0.736456
RSPO1	7.49602e-206	-0.633356	-2.56483
FGF15	1.97004e-205	-0.791865	-2.99819
UGDH	2.26316e-205	0.34731	0.854236
OAF	2.93111e-205	0.27181	1.10282
PAX6	5.95416e-205	-1.23419	-3.48526
STX3	1.63924e-204	-0.528866	-1.96297
PLEC	6.5595e-204	-0.426573	-1.67298
TMEM126A	9.57274e-204	0.2585	0.473663
WFDC2	1.58151e-203	-0.51714	-1.32652
CRB3	1.73617e-203	-1.10663	-5.20554
TMA7	2.72449e-203	-0.178912	-0.255736
NEBL	7.09053e-203	0.115601	0.604461
IGFBP4	7.36392e-203	0.580761	0.998579
BUB1B	1.49118e-202	0.388378	0.801198
ATIC	3.2305e-202	0.336126	0.602465
ARMC10	5.91109e-202	-0.341361	-0.834637
MRFAP1	1.91942e-201	0.197915	0.334755
EPHA7	1.3442e-200	-0.647187	-2.29257
KRT8	1.95561e-200	-0.948711	-2.06589
CDC42	2.63972e-200	0.227457	0.380045
URI1	3.18427e-200	0.376118	0.701239
RND3	1.11051e-199	-0.433605	-1.18797
PFN2	1.87911e-199	-0.367914	-0.914031
HAPLN1	1.92834e-199	0.136998	0.106706
HIST3H2BA	2.15089e-199	-0.451676	-1.71869
HES5	3.14799e-199	-0.952314	-3.25589
CCDC86	3.91199e-199	0.332082	0.633401
GADD45G	4.72182e-199	-1.03247	-4.13743
CXXC5	1.31274e-198	0.381924	0.91814
ZFP706	1.33853e-198	0.231287	0.390671
ARF6	3.0654e-198	0.384246	0.705779
PROS1	5.35146e-198	0.087007	1.52149
ALPL	1.49934e-197	-0.511776	-2.27085
APBA2	1.83092e-197	-0.494297	-2.26935
MAST4	1.87142e-197	-0.385488	-1.00015
APOC1	2.12287e-197	-0.691566	-3.18686
HESX1	3.84322e-197	-1.37121	-4.46391
RIPK3	6.02519e-197	0.0874872	1.41859
CDHR2	7.55686e-197	0.0125941	2.23768
PLAGL1	1.49767e-196	-0.829082	-4.4444
FOXD4	2.02588e-196	-1.28799	-5.66886
FXYD3	3.79067e-196	0.0193571	2.03193
NCL	4.96719e-196	0.273134	0.446006
PAPSS1	5.34364e-196	0.332144	0.766232
BCAT1	1.99492e-195	0.415286	0.811369
PCSK1N	2.07363e-195	-0.647671	-1.57078
PGAP1	9.08218e-195	-0.425441	-1.93858
FREM1	1.37474e-194	-0.562959	-3.32659
IFFO2	1.50762e-194	0.0899024	1.52899
TSPAN33	3.68532e-194	-0.481792	-2.9062
TOMM70A	8.11214e-194	0.302105	0.561173
ATP5A1	1.01695e-193	-0.220308	-0.303792
PRDX6	1.86939e-193	0.244803	0.400418
NRG1	3.6668e-193	-0.854475	-4.29936
SLC27A6	4.00898e-193	0.0186524	2.54202
EXOSC1	4.5426e-193	0.35444	0.655111
RRAGB	7.54686e-193	-0.446703	-1.66496
SHMT1	1.05718e-192	0.340537	0.832679
SEPT3	1.30211e-192	-0.412888	-1.28319
PRDX3	3.95023e-192	0.355398	0.749414
SULF2	4.45253e-192	0.310448	0.951328
ADGRV1	4.60777e-192	-0.56672	-3.11011
P3H2	6.86539e-192	-0.497372	-2.12814
ARHGAP31	7.52576e-192	0.0878007	0.436242
ZCCHC18	8.08889e-192	-0.476639	-2.37742
MAGEH1	8.45319e-192	-0.356653	-0.873229
JPH4	1.60269e-191	-0.635246	-3.4686
PTPRJ	3.59782e-191	0.041243	2.03055
SNRPA1	6.07764e-191	0.225571	0.383913
POU3F1	8.04598e-191	-0.333548	-0.9832
PTCHD2	1.29546e-190	0.00368772	4.09459
IER2	1.73111e-190	0.374454	0.6821
EEF1A1	2.18908e-190	-0.189868	-0.245228
PGAM1	5.17038e-190	0.186986	0.29675
CDR2L	5.90633e-190	0.148522	1.26063
DACT2	9.77379e-190	-0.666415	-3.87077
DDIT4	1.21372e-189	-0.4533	-1.13436
TBX3	1.7147e-189	0.0835248	1.34294
PPP4C	1.89632e-189	0.299219	0.580093
SMIM14	2.06774e-189	-0.388718	-1.30066
KANK1	3.42823e-189	-0.380351	-1.41195
TMEM147	5.55305e-189	-0.261733	-0.496984
ZIC2	6.67932e-189	-0.466818	-1.27637
LRPAP1	9.75616e-189	-0.417233	-0.976096
PCGF5	1.06161e-188	-0.67177	-3.13672
PRICKLE1	1.71287e-188	-0.517415	-2.83188
GABARAP	2.77696e-188	-0.260468	-0.464559
MAPK12	4.28896e-188	-0.39436	-1.33364
NOLC1	4.48704e-188	0.286514	0.526225
CMTM3	4.66265e-188	0.172529	1.19495
MIR124-2HG	5.05352e-188	-0.594336	-2.42831
NDUFA11	2.26403e-187	-0.228371	-0.390471
BAG4	2.53638e-187	-0.311794	-0.744184
QPRT	7.41054e-187	-0.415229	-1.79936
PID1	9.66231e-187	-0.584881	-3.17257
AMPH	3.42474e-186	-0.622095	-3.30922
AIG1	3.83886e-186	-0.331929	-0.965076
TLE4	9.1103e-186	-0.347082	-0.818456
PTPRZ1	3.07801e-185	0.171093	1.14162
NHSL2	6.56523e-185	-0.470051	-2.48904
ATP10B	6.60037e-185	0.0011912	5.26306
RBP4	1.24103e-184	-0.834014	-3.21031
RPL10A	1.37132e-184	-0.133025	-0.190211
FGD1	2.18395e-184	0.261875	0.968617
MCF2	2.29691e-184	-0.724048	-4.05477
LHX1	2.47945e-184		-27.3722
PDPN	1.104e-183	-0.518968	-2.76675
ZFP703	1.22232e-183	-0.607369	-2.18358
MIEN1	1.45124e-183	-0.27958	-0.56384
EPB41L4A	1.60325e-183	-0.495546	-2.4597
XPOT	6.28885e-183	0.361744	0.802511
SOCS2	1.00862e-182	-0.460756	-1.17817
PRKAG2	3.6876e-182	-0.352159	-1.50583
GM30191	7.92131e-182	0.00631091	3.68086
ELAVL4	8.09499e-182	0.0501759	1.79747
PSMG3	1.12984e-181	0.291865	0.600227
PHB2	1.86184e-181	0.213737	0.361344
ATP5J2	1.9141e-181	-0.173673	-0.259342
PRODH	1.95939e-181	0.233375	1.00704
CPNE2	2.2126e-181	0.0830639	1.48703
NBL1	2.31173e-181	-0.635922	-3.38503
CDK2AP1	3.89747e-181	0.272891	0.492719
ENG	4.36421e-181	0.0396746	1.04374
RASSF7	6.35476e-181	-0.343106	-1.12803
CTNNAL1	7.22653e-181	-0.346558	-0.987232
TCN2	2.29213e-180	0.123313	1.1893
WDR6	3.04599e-180	-0.324741	-0.767745
FZD7	4.8748e-180	0.301477	1.02842
NAA50	7.69419e-180	0.275127	0.493653
THBS3	8.40102e-180	-0.352677	-1.44967
ATP5K	1.62933e-179	-0.279427	-0.461253
GDPD1	4.22911e-179	-0.383978	-1.80925
H2AFY2	7.55873e-179	-0.279781	-0.423819
LSR	9.30883e-179	-0.330556	-0.749624
GALK1	1.44394e-178	0.278776	0.480373
RPL27	1.6772e-178	0.20734	0.347323
PTMS	1.68687e-178	-0.306871	-0.504025
SH3GLB1	1.03173e-177	0.440954	0.674628
HDAC6	1.08389e-177	-0.400898	-1.10917
PRSS8	1.22426e-177	-0.84826	-4.18806
STARD10	1.6057e-177	-0.469526	-1.75512
TESK1	3.20566e-177	-0.335153	-1.21906
PRDX1	6.21398e-177	0.159923	0.240301
MEG3	7.75724e-177	-0.496622	-0.785995
UTP11L	1.0461e-176	0.248159	0.46157
IFITM2	1.2606e-176	-0.286147	-0.424736
ATG4A	1.58287e-176	0.0602562	1.616
SKAP2	1.61003e-176	-0.384919	-1.41611
UQCR11	1.82242e-176	-0.203565	-0.31226
X1700019D03RIK	1.87529e-176	0.0767456
MAP2K6	2.10151e-176	-0.336661	-0.891736
IQGAP1	4.54416e-176	-0.386135	-0.841204
ENC1	1.14122e-175	0.217371	1.09092
JADE1	1.77778e-175	-0.376714	-1.02455
ZNHIT6	1.99683e-175	0.285937	0.57023
G0S2	2.24763e-175	-0.524609	-3.62967
ZFPM1	2.0904e-174	-0.608195	-2.30609
SRP9	2.55481e-174	0.25185	0.44923
STARD8	1.68036e-173	0.121652	0.552079
ACOT7	1.86293e-173	-0.348027	-1.12204
NPEPL1	2.62306e-173	-0.323192	-1.00704
NME2	4.37982e-173	0.192966	1.0447
PAK1	1.12379e-172	-0.349887	-0.846465
GPX3	1.43501e-172	-0.482115	-1.39928
MYCBP	1.50469e-172	0.277141	0.553787
ADAMTS4	2.58245e-172	0.0301442	2.15624
CD302	3.94588e-172	0.23041	1.01999
JUP	4.03297e-172	0.117981	1.0265
UACA	7.26811e-172	-0.413421	-0.985782
X1500009L16RIK	7.41825e-172	-0.30518
SRSF9	9.09686e-172	0.246966	0.438719
IGDCC3	2.07708e-171	0.376507	0.847167
COPZ2	2.16454e-171	0.169392	1.12577
CYSTM1	7.22362e-171	-0.543835	-2.8495
HAUS3	1.04677e-170	0.335772	0.760156
ZEB1	1.36098e-170	-0.417651	-1.28211
RALB	1.85585e-170	0.236471	1.06302
RTKN	3.84366e-170	0.128005	1.22108
RAN	4.08294e-170	0.146592	0.22215
BTBD3	4.70827e-170	0.173314	1.10744
TMEM119	5.4566e-170	0.0618161	1.52291
ZFP219	9.62803e-170	-0.319	-0.783603
HAND2	1.46946e-169	-1.60578	-5.94691
WWTR1	2.30905e-169	-0.345221	-1.41175
GM42418	3.22455e-169	-0.783353	-1.43312
SDCBP	3.57677e-169	0.320099	0.685198
NR2F2	4.10615e-169	0.46643	1.15564
STAMBPL1	6.56442e-169	0.0556028	1.64696
GRTP1	8.10163e-169	-0.360239	-1.55284
WNT8A	8.42289e-169	-1.57612	-7.67445
CNKSR2	9.81502e-169	-0.424859	-2.20102
PPP1R1A	1.02622e-168	-0.44069	-0.984004
LAP3	1.12697e-168	0.244758	0.461997
TWISTNB	1.70127e-168	0.269712	0.495179
SEMA3F	2.1932e-168	-0.427119	-2.3938
CBX3	3.56622e-168	0.246626	0.361546
MEOX1	4.24796e-168	-1.59285	-4.66892
MEIS2	6.62422e-168	-0.320968	-0.629177
GLI1	2.78026e-167	-0.570816	-3.80453
DIMT1	5.42118e-167	0.309646	0.692535
HOPX	5.56116e-167	0.21617	1.4296
SYNRG	8.75919e-167	-0.342728	-1.3017
SEC62	1.56292e-166	-0.255394	-0.445749
TCOF1	2.21442e-166	0.269922	0.504038
KCNH2	2.43136e-166	-0.455401	-2.80122
LZIC	4.48757e-166	0.284336	0.866948
TCEAL5	6.48389e-166	-0.392047	-2.06817
ARPC5	6.58979e-166	0.291713	0.541655
MAP7	1.63065e-165	-0.641587	-4.08716
LRRTM3	1.65267e-165	0.0621722	1.70635
RARB	2.23169e-165	-0.451348	-2.58071
F11R	2.69776e-165	-0.433545	-1.47546
CGN	3.62962e-165	-0.493717	-2.6881
CBLN1	5.03028e-165	-0.636077	-3.70659
BCAT2	5.07471e-165	0.297518	0.842714
PSMD12	5.268e-165	0.207573	0.356051
AHNAK	8.57786e-165	-0.859327	-3.62424
RAB4A	2.05236e-164	-0.330689	-0.916504
USP51	2.33397e-164	-0.382038	-1.32917
EIF2B3	3.33155e-164	0.308066	0.593322
MRTO4	4.048e-164	0.223163	0.396068
CYBA	1.99869e-163	-0.361501	-0.816857
PTGDS	2.30029e-163	-1.022	-5.10428
MIA2	2.63409e-163	0.365045	0.679722
VGLL4	3.41934e-163	0.39979	0.846465
BACH2	5.17267e-163	0.122878	1.32216
X2900011O08RIK	1.30478e-162	-0.710781
GALNT7	1.41196e-162	0.318769	0.911312
CAMK1	1.68576e-162	-0.330115	-1.37227
LYAR	2.17087e-162	0.253952	0.406483
NPM1	2.28671e-162	0.162274	0.264978
MAT2A	2.90482e-162	0.245993	0.442022
ABCG2	4.98964e-162	0.370618	0.794625
TTYH2	5.71056e-162	0.0285848	2.18502
BTF3	8.12863e-162	0.144704	0.235588
KHDRBS3	1.15656e-161	-0.317084	-0.624979
POLG	1.27472e-161	-0.361063	-0.976945
MSANTD4	1.46427e-161	-0.304935	-0.865347
PLCB4	2.62626e-161	0.245299	1.03137
COL11A1	3.80868e-161	0.0907988	1.24187
FMNL3	4.36196e-161	0.0968119	1.33494
CASP3	4.93742e-161	-0.282825	-0.549018
FRMD5	5.22123e-161	-0.444123	-2.91058
GSTO1	6.47825e-161	0.323224	0.692505
MED13L	8.02488e-161	0.279315	0.883601
DDT	8.99094e-161	-0.279704	-0.473238
C1QBP	1.83732e-160	0.203854	0.336718
DLK1	2.85504e-160	-0.704937	-2.36719
ABCE1	3.31667e-160	0.275385	0.525205
CMPK1	4.3143e-160	0.290828	0.54914
TIMP2	4.66902e-160	-0.35143	-1.13346
TMA16	7.73825e-160	0.316179	0.558451
FGF3	9.26292e-160	-0.938586	-4.54599
TPM1	1.76448e-159	-0.570764	-0.956289
PWP1	1.92365e-159	0.276261	0.571343
MRPL20	5.25644e-159	0.205149	0.35175
SUN1	1.49634e-158	-0.320924	-1.21898
FLOT2	1.84601e-158	-0.308555	-1.02731
CALCA	7.78706e-158	-0.707054	-3.708
PDLIM7	1.24756e-157	-0.334602	-0.73806
VCAN	1.38531e-157	0.60209	0.751521
HSPA4	1.4814e-157	0.234963	0.419854
CINP	2.17792e-157	0.305941	0.653406
DNAIC2	3.39642e-157	0.0065629	2.63802
RAC3	5.19259e-157	-0.32901	-1.02066
PATJ	5.49553e-157	-0.446388	-2.65596
TMEM38B	5.7909e-157	-0.350005	-1.56023
WDR75	6.28588e-157	0.319243	0.582791
MYL6	7.16266e-157	-0.230014	-0.367312
FZD5	7.22545e-157	-0.738145	-3.0909
NFATC4	8.14482e-157	-0.352298	-1.89177
ZRSR2	1.59553e-156	0.267319	0.48319
X3632451O06RIK	2.47864e-156	-0.448097
SIX3	8.30292e-156	-1.07671	-2.75412
SEPT11	9.43579e-156	0.316851	0.578842
SCRG1	9.718e-156	0.000136018	8.29745
UBE2I	1.43984e-155	0.163736	0.27985
RPL36A	1.54485e-155	-0.129522	-0.188689
SERINC2	2.16273e-155	-0.395895	-2.18104
EYA2	2.28771e-155	-0.477819	-2.50735
DHCR24	3.07649e-155	-0.328711	-0.88591
SLCO5A1	3.64732e-155	-0.594941	-4.10757
NBEAL1	4.46373e-155	-0.331529	-0.941795
RPS15	5.30253e-155	-0.123561	-0.177809
PFDN2	6.01216e-155	0.224745	0.40654
KLC3	1.42801e-154	-0.487828	-3.15104
BAX	2.21739e-154	0.188358	0.316475
PLCL2	2.52293e-154	0.0901803	1.3232
TBCA	3.69065e-154	0.2056	0.316495
ORMDL2	3.89766e-154	-0.260343	-0.499678
CAP2	9.93545e-154	-0.602984	-3.38119
GATSL2	1.00082e-153	-0.355063	-1.60127
NGF	1.22628e-153	0.00346177	3.81674
LXN	1.41156e-153	0.180412	1.00871
TGFB2	1.74762e-153	-0.623597	-2.39339
ETF1	3.53724e-153	0.22341	0.421302
IMP4	4.15636e-153	0.279111	0.537459
NOP14	4.89863e-153	0.252375	0.488979
MFGE8	5.22535e-153	-0.340552	-1.11091
FHOD3	5.39566e-153	-0.414649	-2.01847
SPHK1	5.65157e-153	0.00351993	3.76425
TAX1BP3	6.56875e-153	0.302115	0.892461
EML1	1.18197e-152	-0.340986	-1.3694
EXOSC8	1.2117e-152	0.225388	0.407915
SPOP	1.47229e-152	-0.268602	-0.528268
TSPAN12	1.49711e-152	-0.362428	-1.18829
OCIAD2	1.53915e-152	-0.375486	-2.14508
DBI	1.95269e-152	0.218978	0.348476
LSM8	2.86051e-152	0.222138	0.406674
USF2	4.18824e-152	0.287187	0.540323
PPAT	6.62529e-152	0.284009	0.538656
FOXD1	7.78901e-152	-0.975395	-3.0618
DDIT4L	1.67309e-151	-0.457083	-3.03485
SPRED1	1.73221e-151	0.440177	0.804686
LBH	2.09114e-151	0.0840152	1.47061
SLC16A13	3.03432e-151	-0.370247	-2.00496
NIN	3.04836e-151	0.100405	1.35287
TCEB1	3.11571e-151	0.200418	0.332152
AHDC1	4.34587e-151	0.262906	0.928459
PLAT	4.37215e-151	-0.428997	-2.24249
MARC2	5.63706e-151	-0.315539	-1.07745
COL9A3	5.79119e-151	0.0856264	1.31484
SSB	5.96048e-151	0.174272	0.293319
RNASEH2C	6.05829e-151	-0.223682	-0.399154
AVEN	9.06789e-151	0.293635	0.69615
CRABP1	2.18861e-150	0.783545	1.12389
H2-KE6	2.85488e-150	-0.318609	-0.942509
PRPS1	3.60006e-150	0.356476	0.629892
CABLES1	4.14687e-150	-0.328672	-1.81355
MIAT	4.25513e-150	-0.512741	-2.88937
NRP1	6.99223e-150	-0.604275	-2.1729
CRMP1	1.03483e-149	0.300642	0.843103
TAGLN2	1.12917e-149	-0.37758	-0.745828
BOP1	2.0604e-149	0.314235	0.626031
BZW1	2.22097e-149	0.191747	0.319982
ZCCHC24	3.08321e-149	0.0907168	1.31124
TMEM132C	3.90017e-149	-0.487361	-2.10197
DAG1	4.79917e-149	-0.313903	-0.765338
SEPT10	5.323e-149	0.269681	0.858019
YWHAQ	9.88952e-149	0.17296	0.287002
KIF5C	1.66095e-148	-0.325129	-0.834214
MPHOSPH10	2.25482e-148	0.246502	0.471977
CD59A	4.98433e-148	-0.494329	-1.74972
FAM171B	5.45718e-148	-0.368143	-1.90364
SUSD4	6.16843e-148	-0.426818	-2.67627
LRIG3	8.95041e-148	-0.342931	-1.07546
KDELC1	1.76069e-147	0.29178	0.771576
X9130401M01RIK	2.62156e-147	0.275584
FBN2	2.62755e-147	0.369926	0.590486
BIK	2.82943e-147	-0.661355	-3.92685
ENO3	3.46688e-147	-0.315177	-0.759072
RAB25	4.94849e-147	-0.620604	-2.64821
KRT19	5.1112e-147	-1.08612	-4.48625
CCDC112	6.00063e-147	-0.328637	-1.00817
RIPK4	6.40103e-147	-0.610476	-4.46149
UTP18	6.41393e-147	0.293365	0.558304
NDUFB7	1.07119e-146	-0.193726	-0.316251
CELF4	1.19644e-146	-0.35719	-1.78877
RANGRF	1.28844e-146	0.348016	0.602261
FUOM	1.8751e-146	-0.472406	-3.09606
IKZF2	2.0819e-146	-0.387771	-1.41345
POLR2D	3.88281e-146	0.238488	0.445583
ARL6IP5	3.95164e-146	-0.293622	-1.04685
DLGAP4	5.6973e-146	0.312293	0.683667
KCTD15	7.1305e-146	0.200637	0.979188
POR	1.37236e-145	-0.310246	-0.902438
H3F3B	1.5424e-145	0.154597	0.228317
COX20	1.62067e-145	-0.270292	-0.641315
PLXNA2	2.4393e-145	-0.403995	-1.45032
RHOU	2.55604e-145	-0.333458	-0.899273
EFEMP2	2.81287e-145	-0.336984	-1.62022
PPP1R14A	3.49749e-145	-0.393815	-1.68635
AP1M2	3.85994e-145	-0.552136	-2.9093
SDAD1	6.57898e-145	0.284446	0.549442
TYRO3	6.57898e-145	-0.321071	-1.10927
NEFH	1.13482e-144	-0.631122	-3.95383
TNFRSF19	1.24521e-144	0.319023	0.88015
SHMT2	1.43661e-144	0.303391	0.644037
ACADL	1.82915e-144	-0.289326	-0.841817
SFT2D2	2.13916e-144	-0.314141	-1.33614
REXO2	2.60664e-144	0.259754	0.475845
CER1	2.84009e-144	-1.48221	-7.68301
PPP1CA	3.08096e-144	-0.163148	-0.255576
MRPL36	3.37258e-144	0.239196	0.438907
EIF2S1	7.59904e-144	0.19458	0.343293
DNAJC2	8.1131e-144	0.199562	0.361558
LDB1	8.48623e-144	0.307357	0.694284
SOX6	8.92025e-144	0.0738795	1.37456
A830018L16RIK	4.27665e-143	-0.505252	-2.91952
UBE2D3	5.68517e-143	0.181207	0.315405
CNN3	6.7911e-143	0.250604	0.461171
NDUFAF2	7.39943e-143	0.253966	0.501537
FGF13	1.73548e-142	-0.32539	-1.68625
PELI2	1.73982e-142	0.232647	0.910524
ATP5E	2.38217e-142	-0.178211	-0.278664
RAB8B	2.66044e-142	0.192942	0.978986
ARID5B	7.11662e-142	-0.367767	-1.82049
SPTAN1	7.52783e-142	-0.306671	-0.671284
MTMR7	1.1411e-141	-0.40795	-2.89802
TOMM22	1.22022e-141	0.201614	0.384527
X4921524J17RIK	1.31501e-141	0.312932
LIX1	1.85128e-141	0.219829	0.739944
STARD13	2.17993e-141	0.0218939	2.08735
AR	2.69228e-141	-0.605986	-4.38941
PAPPA	3.50574e-141	-0.476108	-2.48903
GATA4	7.60573e-141	-1.15175	-5.888
ZIC5	1.64553e-140	-0.425967	-1.44568
EMB	1.64674e-140	-0.447712	-0.738071
MAN2A1	4.22151e-140	0.239654	0.965034
KLF15	4.86087e-140	0.045077	1.66005
NDNF	6.28058e-140	-0.585768	-3.31498
TGFBR3	6.3089e-140	-0.438077	-2.51578
SMIM10L1	7.37327e-140	0.319954	0.701305
RAP1A	8.19686e-140	0.261361	0.501348
BUB1	1.15642e-139	0.321604	0.595912
CD151	1.43831e-139	-0.293928	-0.799863
EHBP1	1.61803e-139	-0.387573	-1.47022
IFITM3	1.65426e-139	-0.393695	-1.13442
DDX27	1.9229e-139	0.247404	0.470385
PPIF	2.38483e-139	0.2779	0.743344
TUBB4B	2.52572e-139	-0.241016	-0.338477
CDH11	2.80945e-139	0.312488	0.813444
ITGA3	5.55841e-139	-0.604035	-3.86758
CDA	6.2049e-139	-0.462414	-2.3831
DNTTIP2	7.36967e-139	0.241369	0.456343
OTX1	9.93636e-139	-0.733453	-3.06523
ACAA2	1.07096e-138	-0.312068	-0.940545
CDX1	1.19475e-138	-1.26338	-4.18636
EIF5	1.52766e-138	0.161929	0.268189
EIF2AK4	1.78516e-138	0.252696	0.847642
KIF21B	2.44239e-138	0.109605	1.21007
MARCH2	2.68387e-138	-0.29715	-1.16433
NECTIN2	2.79542e-138	-0.314773	-0.657666
SLC39A8	2.95539e-138	-0.453124	-1.94033
BTG2	2.99027e-138	-0.353983	-1.57721
PPIL3	3.91074e-138	0.289214	0.575266
GM20661	5.82764e-138	0.00295595	3.59878
METAP2	6.60943e-138	0.182017	0.291509
TMEM256	8.36814e-138	-0.239837	-0.442605
FAM162A	9.47715e-138	0.254341	0.407797
LRRN4	1.30764e-137	-0.472405	-2.54641
PLEKHA6	1.64463e-137	-0.663116	-4.69141
CCL9	2.61797e-137	0.000165826	7.23583
NSMAF	3.64045e-137	-0.292696	-0.889064
ATP1B1	3.90173e-137	-0.519697	-2.4362
GOLM1	5.46243e-137	-0.261199	-0.498385
CARD19	5.5033e-137	-0.35699	-2.06348
NKX2-5	6.72604e-137	-1.53705	-5.75048
RPL28	2.2759e-136	-0.109169	-0.155022
LRRC8C	2.90043e-136	-0.345616	-1.77105
WNT2	3.39713e-136	-1.87616	-9.25357
MAN1A2	1.8224e-135	0.336218	0.579247
LOXL3	2.1018e-135	0.020884	2.12571
GUSB	2.79433e-135	0.263789	0.767426
ITM2B	4.52032e-135	-0.296559	-0.621889
KCNK1	6.53369e-135	-0.340235	-1.34452
ATP1B3	7.13619e-135	0.268355	0.50431
SUMO2	1.04303e-134	0.151034	0.232026
TMX2	1.16786e-134	-0.279251	-0.86926
CTXN1	2.27449e-134	-0.279594	-0.660568
ECE2	3.76206e-134	0.278514	0.686845
SS18	3.77508e-134	0.286629	0.598392
ASNS	3.98568e-134	0.312646	0.670264
PLTP	4.28143e-134	-0.445169	-2.99535
UBE2J2	4.39293e-134	0.234986	0.480467
CNTRL	4.80611e-134	0.297065	0.809927
PEG10	5.82692e-134	0.284968	0.831464
ARFIP2	7.11514e-134	-0.276412	-0.759544
FOXA2	9.55339e-134	-1.47262	-5.2901
SIX1	1.05581e-133	-0.573402	-2.26328
TNFAIP6	1.08949e-133	0.0343344	2.05492
DUSP7	1.11539e-133	0.222423	0.915728
BMP7	1.66475e-133	-0.344457	-1.29134
TNNT3	2.59439e-133	-0.694377	-4.41854
RBBP4	3.0022e-133	0.193884	0.340496
HOXA2	3.15478e-133	-0.718997	-4.00372
NDUFA6	3.63561e-133	-0.201338	-0.359337
RCC1	8.42378e-133	0.270917	0.560906
LRRN1	1.02921e-132	-0.396503	-2.74728
NACC2	1.03864e-132	0.0336568	1.79919
ZBTB1	1.04464e-132	0.142967	1.08804
CSK	1.08343e-132	0.278416	0.621056
TSPAN18	1.15205e-132	0.176724	0.685871
SULF1	1.17892e-132	-0.351955	-1.07865
CFAP20	1.23968e-132	0.245726	0.471985
EEF2	1.81789e-132	-0.167597	-0.206634
TUBA4A	3.30372e-132	-0.510273	-3.31915
USF1	3.59324e-132	0.273888	0.759164
GSTP1	5.25303e-132	0.178282	0.877796
SMIM10L2A	5.5995e-132	-0.362088	-2.61465
ELAVL1	5.67786e-132	0.206872	0.388774
CHST3	8.0644e-132	0.0394471	1.70204
DTYMK	1.06968e-131	0.177211	0.308162
DSTN	1.15257e-131	-0.264886	-0.485742
PDE7B	1.26998e-131	0.00541	3.18602
CDV3	1.32705e-131	0.218317	0.344731
TXNRD1	2.56914e-131	0.256096	0.483655
TGFB1	3.21238e-131	-0.833672	-4.08749
NCOR2	3.70557e-131	-0.295999	-0.772509
GM2000	3.7986e-131	0.203892	0.37453
CRLF1	4.3691e-131	0.0361045	1.77076
IFI204	5.82481e-131	-0.743577	-4.36477
PHLDA1	6.49662e-131	0.482402	0.815241
HN1	1.10917e-130	-0.239137	-0.34305
YRDC	1.28192e-130	0.319304	0.618692
HOXB4	2.64671e-130	-1.3797	-6.91294
SCAF11	3.75517e-130	0.229728	0.42271
LDHB	4.05868e-130	-0.333297	-0.554441
REEP1	4.55286e-130	-0.34157	-2.05347
SCD1	5.84117e-130	0.138987	1.04057
PLAC8	6.26419e-130	-0.459775	-2.02715
CERS4	6.51331e-130	-0.348174	-1.45675
X2700038G22RIK	7.19872e-130	0.301585
TRH	7.64114e-130	-1.21652	-4.82794
PLCE1	8.59757e-130	-0.324117	-1.60053
KLK6	8.95735e-130	0.000447743	5.9124
STRBP	1.53482e-129	-0.246375	-0.444547
ZDHHC21	2.41905e-129	-0.29674	-0.888006
ZMIZ2	2.9688e-129	-0.276584	-0.790692
DGKK	4.01602e-129	-0.495138	-2.89135
RPP40	4.30098e-129	0.263529	0.702755
COLEC12	4.62344e-129	-0.364519	-0.968536
NOA1	6.70223e-129	0.282774	0.72531
FOXF1	8.01142e-129	-0.941771	-4.70026
CRELD2	1.14337e-128	-0.265645	-0.570213
ACRBP	1.53611e-128	-0.306925	-1.47144
NDUFS6	1.61408e-128	-0.177037	-0.291102
RPL18A	1.91493e-128	-0.105316	-0.148394
HCFC1R1	2.50667e-128	-0.299956	-0.887822
COX8A	2.84307e-128	-0.151233	-0.236108
TIMM8B	3.25632e-128	-0.189122	-0.305598
TNFRSF1A	5.06498e-128	0.136735	1.05967
PCBP4	6.99895e-128	0.218515	0.400155
GNAO1	7.13298e-128	-0.311968	-1.55521
MAP7D2	8.99949e-128	-0.334831	-1.32043
PDCD6	1.19409e-127	0.212629	0.414652
PUS7	1.19949e-127	0.312777	0.664534
NUP210	1.28527e-127	-0.311065	-1.53343
ERBB2	1.96685e-127	0.130001	1.07452
SEC61G	3.55239e-127	-0.144604	-0.228951
DHX32	3.74994e-127	-0.297783	-1.0786
ATP6V0B	4.5398e-127	-0.237565	-0.444207
HIST1H2AP	4.58674e-127	-0.68619	-1.1025
PSAP	4.64253e-127	-0.261911	-0.642943
COL4A2	5.07552e-127	-0.367785	-1.08609
STMN3	5.18507e-127	-0.313985	-1.51992
PSMG4	5.45266e-127	0.245791	0.459116
EGFLAM	6.35991e-127	0.0444899	1.48198
TXNL4A	8.94224e-127	0.179755	0.300743
RBMS1	1.0138e-126	0.466265	0.678047
DCTPP1	1.03461e-126	0.205615	0.332952
RAVER2	1.84508e-126	-0.292912	-1.33796
RRAGD	2.65241e-126	-0.294141	-0.575352
NXN	3.25706e-126	-0.247046	-0.510556
ECSCR	3.89002e-126	0.0753359	0.375644
FAM173A	3.93999e-126	-0.249866	-0.622631
SNAP47	4.97354e-126	-0.253011	-0.628054
DEPDC7	5.19344e-126	-0.348951	-1.96829
MALAT1	5.49233e-126	-0.329314	-0.489599
HES6	7.48747e-126	-0.277418	-0.901228
GAS7	9.8076e-126	0.0304575	1.66492
UCP2	1.28827e-125	-0.296007	-0.947206
HIP1	1.40932e-125	0.326218	0.649035
GAL	1.78937e-125	-1.12102	-5.89036
CLNS1A	2.14446e-125	0.189306	0.349732
PITX2	2.59758e-125	-0.818822	-3.56629
NT5DC2	3.18057e-125	-0.191935	-0.263792
JOSD2	5.50705e-125	0.278121	0.751095
PCDH19	6.60124e-125	-0.957737	-4.00769
PEG12	1.16316e-124	0.158994	0.786738
CTDSPL	1.2862e-124	-0.297547	-0.894932
X6330403K07RIK	1.60044e-124	-0.321575
RASGRP2	1.75563e-124	-0.252786	-0.895073
EXOC6	1.78122e-124	-0.344599	-2.16786
GLI2	2.49252e-124	-0.278013	-1.17302
PNO1	3.55134e-124	0.221495	0.433226
PFDN4	4.2225e-124	0.230362	0.462718
RCSD1	5.72835e-124	-0.648772	-3.16929
HTRA2	5.76349e-124	0.294525	0.690891
MYL2	7.18006e-124	-1.00791	-6.7606
HSD17B11	9.00303e-124	-0.443263	-3.00641
YBX3	9.01746e-124	0.198412	0.366808
NPPB	9.01746e-124	0.00328827	3.54681
CDX2	1.19041e-123	-1.57536	-6.39744
EEF1D	1.24516e-123	0.155372	0.240749
TPBG	1.39221e-123	-0.330416	-0.935639
TXNL1	1.71059e-123	0.173165	0.286373
WDR36	2.03771e-123	0.293978	0.650256
TEX15	2.86598e-123	-0.380051	-2.26767
EXOSC3	3.10444e-123	0.225682	0.47058
ROR2	3.22707e-123	-0.298026	-0.837212
DEDD2	3.6834e-123	-0.289143	-1.72758
TMEM51	7.58273e-123	-0.357702	-2.00346
LASP1	8.40733e-123	0.250924	0.839495
PGM1	9.53659e-123	0.183767	0.88506
IPO7	1.60062e-122	0.285458	0.555946
SPRY4	1.62708e-122	0.0511815	1.65846
GTPBP10	5.75764e-122	0.260241	0.800577
RASA2	8.46396e-122	0.226922	0.842942
PET100	1.09469e-121	-0.239176	-0.546956
KIRREL	1.34316e-121	0.175604	0.966337
RAB3IP	1.86486e-121	-0.242737	-0.571348
KCTD12B	2.0713e-121	-0.40174	-2.05862
HNRNPH3	3.98355e-121	-0.216825	-0.320125
ITGB8	5.43328e-121	-0.500289	-3.51698
EN1	6.03175e-121	-0.203274	-1.29393
URAH	6.94181e-121	-0.402221	-2.99107
MAGI1	6.97561e-121	-0.295204	-1.08921
CALM2	7.07619e-121	0.167999	0.267469
PSME2	8.0163e-121	-0.243345	-0.539227
AP1S3	9.23987e-121	-0.367457	-2.3826
PCDH10	9.43412e-121	0.0102895	2.38642
ID4	1.10164e-120	0.053476	1.56464
CYB5A	2.27126e-120	-0.22229	-0.401102
ATG101	3.22603e-120	0.252991	0.54361
NDFIP1	4.94979e-120	0.177186	0.881003
TTR	6.84742e-120	-1.19221	-4.20221
KLK8	7.69911e-120	0.353987	0.684063
DNPEP	1.01808e-119	-0.258981	-0.637435
PRKRA	1.30074e-119	0.246078	0.497411
PLVAP	1.37867e-119	0.052494	0.816641
VDAC1	1.56926e-119	0.171014	0.300394
RAMP2	1.63087e-119	-0.39594	-1.14909
GPR162	2.13605e-119	-0.391327	-2.97348
SPINT1	2.14101e-119	-0.409738	-2.68016
SIGMAR1	2.59776e-119	0.270356	0.50616
MME	3.15098e-119	-0.524607	-3.13028
WIPF3	4.90379e-119	0.0753185	1.40824
SKIDA1	4.97207e-119	0.200874	0.831429
COL26A1	5.87515e-119	-0.458885	-2.00477
UBE2F	5.98817e-119	0.266161	0.506825
TIMM9	7.85181e-119	0.274477	0.536241
L1TD1	9.9886e-119	-0.447941	-2.10043
TMEM9	1.05939e-118	-0.240967	-0.562602
SPEG	1.08965e-118	-0.276283	-0.960512
STRAP	1.10956e-118	0.188682	0.357603
ZFP979	1.15161e-118	0.131187	1.0645
SPPL2B	1.33645e-118	0.126361	1.03269
SLC6A8	1.52547e-118	0.0832206	1.24841
ISG20L2	1.69639e-118	0.295641	0.708451
COL5A2	2.1544e-118	0.141964	0.95286
CTSD	2.36599e-118	-0.260736	-0.587123
GTF2E2	3.11336e-118	0.204233	0.405953
WNT5A	3.22369e-118	-0.358226	-1.36091
RPS27L	5.62355e-118	0.152668	0.239087
SOCS1	5.68629e-118	0.0631	1.39854
SHISA2	8.35961e-118	-0.371238	-1.1158
MAP3K1	8.9816e-118	0.228424	0.851623
GM10036	1.19256e-117	0.223854	0.433575
RUNX1T1	1.35861e-117	-0.461873	-2.50282
BGN	1.61924e-117	0.0638779	1.07718
NUP54	1.74924e-117	0.288414	0.563403
RNF138	1.79453e-117	0.29388	0.598439
HIST1H2AK	2.10144e-117	-0.522586	-0.920454
VAMP5	2.13677e-117	-0.538698	-2.54678
NUP153	2.39027e-117	0.294317	0.640536
PTRHD1	2.62609e-117	0.266178	0.606293
FRMD4B	2.91728e-117	-0.364153	-1.94737
EXOSC5	3.1382e-117	0.213777	0.408098
FAM49B	3.31838e-117	0.270637	0.498801
SEPT7	3.35151e-117	0.195766	0.335051
SEZ6	4.35627e-117	0.0316859	1.93644
RGS5	5.89384e-117	-0.913376	-5.37813
LY6H	1.0428e-116	-0.505612	-3.56634
SOX8	1.99647e-116	0.00742975	2.86217
SCAMP2	2.0191e-116	-0.249198	-0.650443
HMGN5	2.10308e-116	-0.24758	-0.432286
RPS27	2.58547e-116	-0.151374	-0.226126
ESRP1	2.70704e-116	-0.534464	-3.17827
MAGOHB	3.34917e-116	0.283211	0.560145
ACTA2	3.48561e-116	-1.06566	-3.84857
PGP	3.57192e-116	0.225098	0.414921
TCEAL6	3.84169e-116	-0.374007	-2.87854
SAMHD1	7.5761e-116	-0.255337	-0.563799
SMG7	2.10687e-115	0.261822	0.733972
GATA5	2.11854e-115	-1.68333	-8.38283
MAP3K9	2.53722e-115	-0.344948	-2.57575
GTPBP4	2.5401e-115	0.194572	0.370745
TRAF3IP1	4.18428e-115	-0.265238	-0.964103
TSPAN5	4.27067e-115	-0.240392	-0.600023
VIM	4.79483e-115	0.551812	0.868216
NAA20	5.14472e-115	0.238217	0.489456
SSBP1	5.17224e-115	0.185413	0.326461
MGST3	5.18874e-115	-0.290963	-1.05302
CITED1	6.03938e-115	-0.535536	-1.82124
GUK1	6.82988e-115	0.197035	0.363041
TNNT2	7.33536e-115	-1.24314	-4.2684
CEP170B	1.00955e-114	-0.315112	-1.807
PSMG1	1.05214e-114	0.196426	0.399385
COX7A1	1.6206e-114	-0.306467	-1.97526
CENPV	1.73932e-114	-0.27815	-1.01392
SAMD10	1.84087e-114	-0.321232	-2.47587
TOM1L1	2.43262e-114	-0.26303	-0.978301
PFDN1	2.56261e-114	-0.166036	-0.287256
EFNB3	3.01004e-114	-0.291767	-1.09566
CTPS	4.11106e-114	0.233398	0.47386
GALNT16	4.12899e-114	-0.334628	-2.39076
PCDH7	5.39255e-114	-0.417464	-1.93595
GRIA3	5.48197e-114	-0.307884	-1.78726
RNH1	5.63897e-114	-0.253475	-0.681242
PAX2	5.97385e-114	-0.450097	-1.75476
DLL1	7.34541e-114	-0.565432	-2.95011
SEMA6A	7.55537e-114	-0.336153	-1.08121
TCF15	9.12978e-114	-0.76063	-2.37456
HOXB3	1.20001e-113	-0.8484	-5.87248
PTOV1	1.40772e-113	-0.174346	-0.278968
GNL3	1.51085e-113	0.218516	0.391704
RPS4X	1.88033e-113	-0.112618	-0.170166
CTSZ	2.42168e-113	-0.257872	-0.506976
ITPKB	2.50179e-113	0.044595	1.43617
RWDD1	2.55885e-113	0.165193	0.262446
FAM57B	3.58337e-113	-0.308896	-1.56427
WBP2	4.60251e-113	-0.25226	-0.667734
TM6SF1	5.72213e-113	-0.340905	-2.24553
ATP6V0E2	6.26711e-113	-0.31097	-2.1778
BBX	8.25154e-113	0.29056	0.535144
MACROD2	1.16321e-112	-0.264658	-0.915609
JMJD6	1.16731e-112	0.219479	0.460014
FEZ1	1.41939e-112	-0.434524	-2.29018
MFNG	1.6214e-112	-0.582316	-4.49539
PRR5	1.7016e-112	-0.30583	-1.31498
FAM181B	1.70583e-112	-0.148903	-0.857989
IGSF8	1.84168e-112	-0.264229	-1.46685
TBX20	2.06398e-112	-1.0982	-5.31059
MPND	2.26739e-112	-0.233044	-0.541348
GM30173	2.33997e-112	0.000317911	6.19296
SMIM1	2.40356e-112	-0.329446	-1.58979
DNASE2A	2.96299e-112	-0.358958	-2.60435
CHCHD2	3.21542e-112	0.11105	0.158985
SYNCRIP	4.15412e-112	0.208067	0.404623
ETS2	4.48069e-112	-0.320915	-1.59267
CLIC6	4.98796e-112	-0.867382	-4.59682
SASH1	6.84617e-112	0.24266	0.788446
IMPACT	6.94839e-112	0.260777	0.735444
MAGOH	8.20336e-112	0.16636	0.293318
HMG20B	8.60414e-112	-0.223393	-0.423734
C330021F23RIK	8.62002e-112	-0.324747	-2.32622
RAX	1.45314e-111	-0.980142	-3.71201
ALAD	2.11566e-111	0.256027	0.511929
MET	3.30692e-111	-0.397217	-3.03494
FOXD2	3.93937e-111	0.0486016	1.47292
CSNK2A2	4.14908e-111	0.193274	0.365996
TCF21	4.85637e-111	-0.803094	-4.28883
FAM188A	6.47337e-111	0.262345	0.697659
CBX7	6.67936e-111	-0.342113	-2.44918
LGR4	7.60221e-111	-0.301137	-1.28089
TOMM40	7.63654e-111	0.192116	0.356226
HUNK	8.54366e-111	-0.263693	-0.923117
L3HYPDH	9.47574e-111	0.09776	1.08869
AQP11	9.50614e-111	-0.330559	-1.86339
GM266	9.63581e-111	-0.412642	-2.04396
SH3TC2	9.76519e-111	0.0177215	2.09484
BAIAP2L1	1.67049e-110	-0.268538	-0.963728
TRAPPC1	1.78979e-110	-0.204332	-0.395846
NICN1	2.04745e-110	-0.249487	-0.99871
GMFG	2.2079e-110	-0.301037	-1.58884
PTCH2	2.26457e-110	-0.383277	-3.09559
ST6GALNAC4	2.41462e-110	0.0679944	1.25235
STXBP6	2.63466e-110	-0.274763	-0.799196
BMP4	3.12995e-110	-0.56498	-2.46939
DNMT1	3.46926e-110	0.232825	0.464064
MYL12A	3.78041e-110	0.219531	0.375865
SYT13	3.83091e-110	-0.559876	-4.34928
PANTR1	4.88883e-110	-0.415096	-2.87893
SFRP2	4.88984e-110	-0.305894	-0.743973
FOXN2	5.16527e-110	0.138891	0.988416
PIM1	6.41285e-110	-0.355709	-1.00598
ST14	7.24584e-110	-0.688106	-4.98064
FSD1L	1.6371e-109	-0.275108	-1.21391
ANXA11	1.64376e-109	-0.285633	-1.91394
TEX10	2.23723e-109	0.283017	0.540663
GMFB	2.3802e-109	0.296335	0.58116
BRICD5	2.77145e-109	0.00228637	3.95949
UNC5C	2.77711e-109	0.0716904	0.98127
GJB5	3.90099e-109	0.0457266	1.47371
ANXA2	4.46996e-109	-0.451329	-1.82459
RAB12	4.66219e-109	0.269109	0.716573
MPZL2	4.8149e-109	-0.671306	-5.32759
STARD3NL	4.84367e-109	-0.228083	-0.491041
PDCD5	5.8794e-109	0.173488	0.277983
SLC25A33	5.91768e-109	0.216285	0.819388
GALT	6.69462e-109	-0.266908	-1.68114
FZD2	6.80719e-109	-0.241939	-0.375782
SEMA3E	7.23177e-109	-0.590963	-3.9241
NTRK2	7.83338e-109	-0.603171	-4.36179
NOS1AP	8.33173e-109	-0.340573	-2.69106
PEA15A	9.05795e-109	-0.252191	-0.753041
PLEKHG1	1.11945e-108	-0.344648	-2.31237
PTGES3	1.49779e-108	0.161143	0.273351
GM11627	1.55221e-108	-0.290113	-1.75859
PPP1R21	2.00392e-108	-0.256566	-1.04158
RPL7	2.67758e-108	-0.0961591	-0.123063
FARSB	3.25079e-108	0.223832	0.472824
NTNG1	3.77997e-108	-0.463956	-2.84766
BZW2	5.3753e-108	0.183968	0.343328
RRP8	7.31536e-108	0.254156	0.511698
KDF1	7.67058e-108	-0.485259	-3.5827
EVA1B	8.62698e-108	0.283926	0.855349
SRGAP2	8.72305e-108	0.240024	0.778976
TMEM82	1.24603e-107	-0.33113	-2.33949
THSD4	2.10102e-107	-0.356064	-2.64531
NENF	2.25588e-107	0.285587	0.536039
CTSL	3.11524e-107	-0.253659	-0.459628
APP	3.61475e-107	-0.293634	-0.679134
FAM71F1	5.82068e-107	0.000713382	5.20861
CELSR1	6.34272e-107	-0.28621	-1.18706
AKAP5	6.40719e-107	-0.467409	-2.92419
CAPG	6.56414e-107	-0.287362	-1.79776
ATP5B	8.19192e-107	-0.169574	-0.236359
PCOLCE	9.03658e-107	-0.348824	-2.08591
BTBD17	1.01483e-106	-0.350047	-1.56048
RNF208	1.16012e-106	-0.300615	-2.2516
MGAT4B	1.4835e-106	0.237615	0.749831
B9D1	2.18971e-106	-0.222077	-0.464003
TFPI	2.45441e-106	-0.367542	-1.55395
RIN3	3.49035e-106	0.0489536	1.14196
MAB21L2	3.65503e-106	-0.717336	-3.57922
POPDC2	4.02174e-106	-0.9607	-5.04533
PLEKHF2	4.07608e-106	-0.249854	-1.00938
BAZ1A	4.75011e-106	0.345792	0.699438
HAS2	6.58798e-106	-0.458523	-1.79316
GSPT1	6.77768e-106	0.182113	0.342456
COL5A1	7.15619e-106	0.137809	0.957959
ZFP280C	7.7749e-106	0.265872	0.734035
RDH10	8.324e-106	-0.288289	-1.24464
CRELD1	9.7264e-106	-0.281447	-2.08305
WBP1	9.94443e-106	-0.231258	-0.609715
TXNDC15	1.16464e-105	-0.22499	-0.555836
NID1	1.24113e-105	0.0565045	1.09162
MAF	1.35551e-105	0.099259	0.45457
LTBR	1.47245e-105	-0.265626	-1.4627
ATP2B4	1.86486e-105	-0.362183	-2.70612
ECHDC2	2.50485e-105	-0.241691	-0.937454
FCOR	3.75383e-105	-0.242153	-1.13849
NOVA2	4.13994e-105	-0.303571	-2.02817
WSB1	4.28823e-105	0.270074	0.63353
GNG2	4.73929e-105	0.315042	0.630995
WNT4	4.78089e-105	-0.472622	-2.76326
DECR1	5.39753e-105	-0.22967	-0.610136
MAPK8IP2	6.56892e-105	-0.289946	-1.76158
ELFN1	9.17693e-105	0.0213785	2.0363
FAM13C	9.31007e-105	-0.328759	-2.40625
MESDC1	1.11624e-104	0.228535	0.79885
PLEKHA1	1.39336e-104	-0.273983	-0.652007
TRMT10C	1.50248e-104	0.278928	0.602765
SPRED3	1.89905e-104	-0.288325	-1.70751
ZFHX2	1.92443e-104	-0.268986	-0.863595
CHPF	1.94008e-104	0.174616	0.841519
LLGL2	2.51397e-104	-0.292359	-1.66152
PSRC1	3.1211e-104	-0.286604	-0.647382
SMNDC1	3.59294e-104	0.228864	0.446911
CDC42BPA	5.2008e-104	0.185916	0.879064
LSM5	1.19069e-103	0.16387	0.307687
TSPO	1.31506e-103	-0.22975	-0.564556
SPTBN2	1.40158e-103	-0.28271	-1.91317
UBE2A	1.87749e-103	0.202569	0.401419
ANKRD9	2.8515e-103	-0.243155	-1.35718
ITGA9	3.48934e-103	0.0899264	0.544281
SON	3.96878e-103	-0.175269	-0.26005
TAF4B	4.08821e-103	0.0912098	1.11662
RBM28	4.54735e-103	0.216014	0.431283
FMN2	4.77989e-103	-0.328044	-2.46016
MAPK13	4.86532e-103	-0.356286	-2.5348
PHF5A	5.26544e-103	0.147339	0.237063
SEL1L3	6.00803e-103	-0.603329	-4.30198
BMP2	8.55536e-103	-0.595173	-2.89903
MPZL1	9.31189e-103	-0.248836	-0.575626
RBM7	1.24389e-102	0.240668	0.49295
MYO10	1.83089e-102	0.383877	0.655897
ASF1B	2.1534e-102	0.269313	0.650271
TRIM2	2.50682e-102	-0.257333	-0.78901
NTM	2.53984e-102	-0.362254	-2.48878
G3BP1	2.77406e-102	0.173146	0.342227
FOXO4	2.95189e-102	0.136927	0.906019
GDI1	3.27865e-102	-0.24229	-0.747977
MRPL12	4.17949e-102	0.17616	0.301563
PNMA2	5.02873e-102	-0.266009	-1.54677
TIPIN	6.15691e-102	0.215266	0.407731
MRPL32	8.43071e-102	0.197539	0.413967
LARP1	1.1219e-101	0.24439	0.489399
CD47	1.26901e-101	-0.265927	-0.757003
FAM172A	1.8542e-101	0.165505	0.876538
DESI1	1.95316e-101	0.248396	0.51582
KLHL13	2.04685e-101	0.177043	0.854141
JAG1	2.1198e-101	-0.306705	-1.1307
AP2M1	2.70527e-101	-0.190166	-0.308086
UTF1	3.88888e-101	-0.664346	-4.28636
BEND4	4.931e-101	-0.253271	-0.866981
CAPN2	5.64351e-101	-0.243848	-0.776309
PEG3	6.29575e-101	0.718905	0.802711
CCDC8	7.33437e-101	-0.238952	-1.06222
POU3F2	8.08897e-101	-0.447316	-2.3161
NECTIN1	9.13045e-101	-0.253553	-0.7031
STOML2	1.02387e-100	0.169879	0.324611
PROX1	1.02644e-100	-0.301941	-2.02416
MRPL41	1.49252e-100	0.200793	0.409636
OAT	1.90869e-100	-0.251004	-0.561354
CEP57	2.05157e-100	-0.214665	-0.421703
SRFBP1	2.41743e-100	0.250305	0.65923
FMC1	3.38396e-100	-0.206548	-0.423562
GUCY1A3	3.46716e-100	-0.589273	-4.28472
PENK	3.49633e-100	-0.695932	-4.82629
SHANK1	3.9947e-100	-0.304433	-2.492
PNPLA2	7.63444e-100	-0.234728	-1.29577
LIMD2	1.51342e-99	0.230014	0.420419
EDN1	1.52502e-99	-0.78325	-4.69648
TMEM150A	1.82144e-99	-0.29347	-1.49721
FBXO7	1.84692e-99	0.0911959	1.04061
X2310030G06RIK	2.50148e-99	-0.400113
TAGLN	2.87297e-99	-0.726305	-2.92512
COL4A5	3.07847e-99	-0.269301	-1.69702
GEMIN5	3.13125e-99	0.292518	0.594658
ANGPT1	3.2238e-99	-0.456612	-3.90347
FBN1	4.11107e-99	-0.311371	-1.80732
MDK	4.23052e-99	-0.183297	-0.264366
SLC35G1	4.88882e-99	-0.251401	-1.20957
NTMT1	5.47103e-99	0.227299	0.46497
ATP5O	5.48162e-99	-0.161029	-0.256885
MRPL34	5.71021e-99	-0.213871	-0.343808
DTX4	6.22918e-99	0.103801	0.932929
LMO3	7.32386e-99	-0.414247	-3.17053
NMD3	7.7979e-99	0.216182	0.480751
DAP3	8.49544e-99	0.187127	0.390485
JAK1	9.49178e-99	0.284766	0.693273
DOK4	1.15747e-98	-0.458357	-2.66804
ASB4	1.25369e-98	-0.376621	-2.052
FLNC	1.39601e-98	-0.270901	-1.08171
ACLY	1.40756e-98	0.293014	0.577063
LHX1OS	1.51661e-98	-0.769729	-7.01275
LARP4	1.68088e-98	0.27677	0.516271
PABPC4L	2.0612e-98	0.140836	0.897017
ST3GAL4	2.34212e-98	0.0762628	1.10556
PPIC	2.42026e-98	0.22821	0.485799
ISM1	2.75988e-98	-0.46236	-3.72998
MT2	3.69625e-98	-0.46022	-2.27149
GRINA	3.93928e-98	-0.242697	-1.15788
METTL2	4.01856e-98	0.256986	0.586472
SOX17	5.12552e-98	-1.22227	-5.53631
RTKN2	5.15439e-98	-0.241951	-1.57339
HELLS	6.39593e-98	-0.223136	-0.337354
EGLN3	7.7612e-98	0.115068	0.982158
SH3PXD2A	8.1012e-98	0.115775	0.998566
HNRNPA1	8.6192e-98	0.138788	0.223324
ZPR1	9.39736e-98	0.2248	0.494427
ETFA	9.80373e-98	-0.230272	-0.608204
FLT1	1.22061e-97	-0.854412	-3.9518
LRRC8B	1.29074e-97	-0.274552	-1.66845
TMEM47	1.65218e-97	-0.235851	-0.475291
EXOSC2	2.08468e-97	0.364062	0.630479
SELENOM	2.98376e-97	-0.232677	-0.588769
RHOX5	3.75861e-97	-0.74771	-3.87023
TXNRD3	3.91539e-97	0.070382	1.154
NPEPPS	3.97742e-97	-0.223622	-0.407409
SLC16A2	5.87076e-97	-0.269139	-1.91948
SELENOK	6.4834e-97	0.200625	0.363526
FEZF1	9.91077e-97	-0.594209	-2.94386
YPEL1	1.14507e-96	-0.208302	-0.543442
GLRX5	1.16289e-96	0.170951	0.309148
NPC2	1.48801e-96	-0.20497	-0.351288
ADORA1	1.83766e-96	0.0145571	2.13817
TPD52L1	1.86137e-96	0.14972	0.88849
NNAT	1.90546e-96	-0.328084	-0.529118
SDC1	1.97084e-96	0.277696	0.657871
HBA-X	1.98227e-96	0.0313407	1.34434
DEB1	2.18208e-96	0.234936	0.496708
NOP2	2.2311e-96	0.258377	0.545854
SLC7A3	2.29401e-96	-0.327202	-2.12033
EIF2S2	2.7522e-96	0.134936	0.202488
UBXN1	3.19535e-96	0.149619	0.265104
SKP1A	3.98675e-96	0.164323	0.282489
SUMO1	4.08107e-96	0.141042	0.232213
FLRT3	4.6978e-96	0.333299	0.629281
TBX2	1.02068e-95	0.0184888	1.7889
PSMA7	1.06396e-95	0.132896	0.197197
DTX1	1.2177e-95	-0.652095	-5.57121
PLPPR1	1.26218e-95	-0.398331	-3.24399
EIF1	1.47711e-95	0.112307	0.181676
PMAIP1	1.56905e-95	-0.314729	-2.39084
PSPH	1.74238e-95	-0.25537	-0.612601
BCR	1.82468e-95	-0.230631	-0.839436
EPHB1	1.83131e-95	-0.279865	-1.03694
ELAVL3	2.0694e-95	-0.401189	-2.87652
ASAP2	2.59261e-95	0.249793	0.628236
ALCAM	2.67549e-95	-0.330622	-1.69932
NUDT19	2.75476e-95	0.283066	0.592206
NOC2L	5.17648e-95	0.222412	0.484685
SVEP1	5.45743e-95	-0.380022	-2.69801
X2810408A11RIK	5.77788e-95	-0.228467
PERP	5.88467e-95	-0.590985	-4.95096
GM16286	5.99784e-95	0.17914	0.356847
LPL	6.5513e-95	-0.265557	-0.988029
IDE	7.21456e-95	-0.234299	-0.559446
RUVBL1	7.33529e-95	0.167246	0.317019
MOSPD1	7.776e-95	0.192189	0.771328
NELL2	1.02456e-94	-0.326776	-2.66992
CELSR2	1.22241e-94	-0.240119	-0.951765
RFLNB	1.35435e-94	-0.252429	-0.837172
KHK	1.56942e-94	-0.216628	-1.11357
H2-Q4	1.58822e-94	-0.287269	-2.49398
RCN3	1.58943e-94	-0.24557	-0.585504
REEP2	1.73658e-94	-0.262926	-1.98932
EFNB1	1.79114e-94	-0.041412	-0.21351
RPIA	2.6038e-94	0.12492	0.905837
NKX1-2	3.18651e-94	-0.973065	-5.08099
CBFA2T3	4.00471e-94	-0.372005	-2.69213
NANOG	4.00471e-94	-0.71777	-5.51867
APOA1	4.1387e-94	-0.712599	-3.3626
RND2	4.16729e-94	-0.246366	-1.12601
FLRT2	4.77735e-94	-0.359551	-2.01268
THBS1	5.44664e-94	-0.518411	-3.02689
GSTM1	7.31135e-94	-0.263125	-1.00161
AMOT	8.75566e-94	-0.224219	-0.711437
GRIK5	1.20533e-93	-0.230865	-1.00181
RELN	1.63117e-93	-0.306589	-2.36685
PDLIM4	1.66449e-93	-0.279597	-0.864736
RCC2	2.02788e-93	0.189829	0.366751
ANP32B	2.13037e-93	0.132594	0.211183
COX14	2.69621e-93	0.238707	0.464142
POLR1E	2.90862e-93	0.24687	0.575129
ZCCHC10	3.049e-93	0.242499	0.585146
CDH2	4.38574e-93	-0.00581526	-0.167446
CLDN3	4.54376e-93	-0.597492	-4.07967
FRAT2	4.71405e-93	-0.226137	-0.62783
WDR61	4.76637e-93	0.174814	0.345855
SEC11A	4.94867e-93	-0.162401	-0.270847
PICK1	5.85992e-93	-0.22838	-0.775244
SCAMP3	6.01726e-93	-0.200575	-0.406584
MEGF6	7.40178e-93	0.0887996	1.06972
SPON1	1.07526e-92	0.121911	0.451927
SENP3	1.16052e-92	0.258447	0.597001
MXRA8	1.23424e-92	-0.248777	-1.66548
METTL16	1.41136e-92	0.241837	0.479638
PPP1R9B	1.64946e-92	0.113999	0.95122
TFDP1	1.92634e-92	0.218712	0.443832
SOD2	1.94259e-92	0.204386	0.427185
SMS	2.1025e-92	-0.218244	-0.328602
LRRC1	2.25802e-92	-0.22909	-1.02095
FBLIM1	2.67129e-92	-0.267259	-1.28489
TMEM63B	2.87858e-92	-0.234325	-0.622886
ZFP623	3.49402e-92	-0.211412	-0.988051
FAM134B	5.62492e-92	-0.461696	-3.56152
ACTR2	6.63118e-92	0.279787	0.556202
RABAC1	7.38551e-92	-0.222303	-0.53513
PHLDB1	9.37111e-92	0.170649	0.817985
PACSIN3	9.91427e-92	-0.234608	-1.47796
DBNDD1	1.17307e-91	-0.260054	-2.26844
ALDH2	1.20221e-91	-0.225338	-0.483205
FHL2	1.27925e-91	-0.322374	-2.03783
NOB1	1.33321e-91	0.236903	0.509553
USP53	1.33808e-91	-0.236135	-1.20169
X2410004B18RIK	1.36332e-91	0.261444
TM9SF4	1.3969e-91	-0.224768	-0.515631
IQCB1	1.4147e-91	-0.217209	-0.567737
CDH3	1.47399e-91	-0.602783	-4.12258
MESP1	1.53268e-91	-1.46358	-7.24611
MECOM	1.59198e-91	-0.319699	-2.00994
PDS5B	1.61333e-91	0.267481	0.559979
TMEM214	1.8744e-91	-0.216512	-0.583674
HEATR3	2.23024e-91	0.241819	0.602641
SPARCL1	2.23116e-91	0.00533246	-0.377685
KLF5	2.26344e-91	-0.525559	-4.14599
BC003965	2.26894e-91	0.197481	0.393047
BICC1	2.4617e-91	-0.305051	-1.42407
WDR83OS	2.47648e-91	0.207302	0.432467
CHST7	2.99184e-91	-0.326591	-2.53759
FRMD4A	3.33805e-91	0.21662	0.736865
SLC1A3	3.4896e-91	0.118012	0.682667
ZFP811	4.74283e-91	-0.249644	-1.33716
TMEM163	4.83864e-91	-0.400499	-3.20113
LYPD2	5.00652e-91	-0.6588	-4.48315
FSTL1	5.51964e-91	-0.238881	-0.50425
ITM2A	6.58901e-91	0.250479	0.69641
ACKR3	7.66136e-91	-0.34401	-2.7747
SCUBE2	9.61926e-91	-0.416997	-2.78594
CLCN3	9.65612e-91	-0.232352	-0.468207
MPP5	1.19132e-90	-0.23376	-0.61766
HMGCLL1	1.71977e-90	-0.330698	-2.91423
PDZRN4	2.18034e-90	-0.4819	-3.96497
HAPLN3	2.36003e-90	-0.276138	-1.91752
NUTF2	2.71667e-90	0.200166	0.707872
SERBP1	3.22796e-90	0.106562	0.172757
PLA2G4A	3.34295e-90	0.0400313	1.39011
CHN2	4.25771e-90	-0.258417	-1.85234
SEMA4D	4.97828e-90	-0.243171	-2.0107
WDR46	5.1858e-90	0.22722	0.508396
DYNC1I1	8.03693e-90	0.0193631	2.02508
GM6133	1.03121e-89	0.280545	0.63589
MIRG	1.06985e-89	-0.268207	-1.0454
UNC5B	1.32244e-89	-0.278226	-1.38406
MRPL57	1.73809e-89	0.205261	0.366549
IRS2	1.91175e-89	0.198042	0.770816
MRI1	2.01989e-89	0.199316	0.626125
RRP1B	2.65661e-89	0.239211	0.454065
DUSP12	3.0507e-89	0.251628	0.545709
RPS19	3.13192e-89	-0.089119	-0.118451
RBM17	3.13538e-89	0.165014	0.322766
MAP3K11	3.46645e-89	0.153772	0.835089
FLOT1	3.65374e-89	-0.213961	-0.910827
BCAS1	4.12235e-89	0.0262081	1.72041
AK3	4.32947e-89	-0.229078	-1.09573
HMGB2	4.61303e-89	0.140484	0.234933
GIT1	4.91958e-89	0.183444	0.759889
ADGRL2	6.47546e-89	-0.229121	-0.428927
UBE2V2	7.11062e-89	0.17289	0.32981
NKX6-1	7.74196e-89	-0.457134	-2.41903
FKBP10	8.08887e-89	0.171319	0.762531
ACACA	1.40092e-88	0.241936	0.678959
SRP19	1.4641e-88	0.154922	0.251623
CNTFR	1.56264e-88	0.223079	0.575426
MT3	1.60231e-88	-0.377618	-3.05452
ROBO2	1.6664e-88	-0.279508	-1.40716
ATG3	1.72188e-88	0.255035	0.576734
GPRC5C	1.7843e-88	0.242668	0.654161
CALR	1.92177e-88	-0.207832	-0.289389
CENPB	2.0343e-88	-0.217331	-0.397971
MATN4	2.07699e-88	0.0103423	2.17404
PUS7L	2.15391e-88	0.129781	0.883298
GM5786	2.20801e-88	0.240854	0.651592
GAB2	2.33496e-88	0.0172087	1.82368
T	2.51952e-88	-1.10165	-5.53977
SALL2	3.90806e-88	0.0431475	-0.0496746
GSTT1	3.93444e-88	-0.344378	-2.92861
CCDC92	4.01506e-88	-0.219272	-1.39746
FKBP1A	4.57445e-88	0.150631	0.241274
PAFAH1B3	5.12471e-88	-0.189657	-0.335899
X2010107G23RIK	5.32509e-88	-0.227218
AFF3	7.02666e-88	0.11131	0.947985
X1700021F05RIK	7.7178e-88	0.226082
LHX5	7.90479e-88	-0.40281	-1.76979
ANKRA2	8.40929e-88	-0.212434	-0.656028
NFIL3	8.81622e-88	-0.221693	-0.918222
MMP11	9.69688e-88	-0.313673	-2.66073
HIBADH	1.06189e-87	0.243982	0.552632
ASL	1.07291e-87	-0.213032	-0.613411
SPINK1	1.43709e-87	-0.632587	-2.31699
DPF1	1.5521e-87	-0.219472	-1.35117
EIF6	1.63849e-87	0.153826	0.279199
SORBS2	1.68126e-87	-0.290308	-1.56943
FAM171A2	2.11269e-87	-0.234772	-0.819723
MRPS10	2.41698e-87	0.205534	0.402852
RP23-145I16-5	3.01371e-87	-0.396465
ACTC1	3.38953e-87	-0.812558	-3.79496
BCL2L1	3.6621e-87	-0.216651	-0.591516
GM9979	3.68463e-87	0.00137144	4.18279
HALR1	4.46141e-87	-0.928168	-6.38804
AP1S2	4.58363e-87	-0.263477	-1.24203
SEPHS2	5.75699e-87	0.280392	0.527705
PKP4	6.23073e-87	-0.225306	-0.464401
GM10260	6.89884e-87	-0.18147	-0.240171
ATP6V1B2	7.04791e-87	-0.215816	-0.460691
DSC2	7.38853e-87	-0.485288	-4.17673
FTSJ3	8.43054e-87	0.209485	0.425429
CDS2	9.05788e-87	-0.222019	-0.747368
CAMK2D	1.27865e-86	0.137678	0.874938
PPP1R9A	1.3492e-86	-0.243826	-0.635482
MDN1	1.43802e-86	0.27271	0.563125
DAGLA	1.50411e-86	0.0074107	2.56426
ARVCF	1.59872e-86	-0.223283	-0.840855
ZFP948	1.94284e-86	0.089659	0.998357
NDUFC1	2.21532e-86	-0.152438	-0.256948
YARS	2.22488e-86	0.239957	0.551223
EBF1	2.2793e-86	-0.277293	-1.05754
LARGE2	2.53738e-86	-0.24458	-1.16243
SPATA5	2.63547e-86	0.247651	0.641162
KCNK2	3.00763e-86	-0.334435	-2.75018
FUNDC2	3.10417e-86	0.223817	0.423195
HIST1H3E	3.98699e-86	-0.234054	-0.703168
SAPCD1	4.29561e-86	-0.232741	-1.34039
GMIP	4.35984e-86	0.0429518	1.32491
SRPR	4.39468e-86	0.250349	0.461164
HMCES	5.08915e-86	-0.20634	-0.590028
MID1IP1	5.17393e-86	-0.281152	-0.895538
D16ERTD472E	5.74472e-86	0.108766	0.926249
CRABP2	5.77432e-86	0.58617	0.577313
GM8797	6.38998e-86	0.202168	0.413744
MDH1	9.55388e-86	-0.154506	-0.268123
MRPL50	9.68244e-86	0.204096	0.429526
CCDC80	9.8523e-86	-0.597366	-4.22312
TIAL1	1.04777e-85	0.218702	0.442141
ABR	1.05305e-85	-0.220704	-1.02187
RAE1	1.1236e-85	0.170082	0.358971
ZFP612	1.4806e-85	-0.215789	-0.894507
PROSER2	1.58048e-85	-0.285037	-2.62267
ADORA2B	1.89393e-85	0.0322817	0.882264
HIST1H4H	1.99817e-85	-0.258348	-1.12317
OARD1	2.78949e-85	0.198938	0.395195
MYBPH	2.7905e-85	0.00244998	3.69574
MRPS17	3.54171e-85	0.173275	0.355252
NEK6	3.54171e-85	0.155455	0.770739
MEGF10	3.68668e-85	0.00685079	2.66517
RRP15	3.71081e-85	0.181358	0.365895
ATP5H	3.95578e-85	-0.112523	-0.156027
GABARAPL1	6.08829e-85	-0.223131	-0.91516
HMGA2	6.3585e-85	0.305532	0.470622
GSC	6.47914e-85	-0.6358	-3.81357
PLIN3	6.86852e-85	-0.212352	-0.43732
TFAP4	6.98167e-85	0.18802	0.751992
CYFIP1	1.00768e-84	0.238285	0.474612
PRICKLE2	1.05389e-84	0.0225048	1.52545
PRR36	1.14593e-84	-0.261248	-2.26795
PTPRF	1.18017e-84	-0.21542	-0.37951
ZFP131	1.36291e-84	0.268081	0.55456
MTFR1L	1.49551e-84	0.235375	0.496868
HSDL1	1.4966e-84	-0.205806	-1.11212
SH2B2	1.5067e-84	0.101454	0.937548
NACC1	1.57191e-84	-0.197533	-0.376724
GNB4	1.6246e-84	-0.22514	-0.747687
X1700066B17RIK	2.01053e-84	0.00178179
PMP22	2.06658e-84	0.0600791	-0.192441
PLEKHA3	2.64666e-84	0.206919	0.698219
CAPN6	3.34114e-84	-0.360991	-2.05532
PTGR1	3.67795e-84	-0.204903	-1.309
FOSB	4.04262e-84	-0.627318	-4.17064
MYLK	4.81998e-84	-0.278901	-1.39163
NDRG2	7.02795e-84	-0.313244	-2.79366
MYL4	7.19168e-84	-0.723492	-3.29658
LHPP	1.10098e-83	-0.204027	-0.789829
RPL37	1.13765e-83	-0.123845	-0.203861
ACTB	1.24525e-83	0.138305	0.174901
PHOX2A	1.7192e-83	-0.372427	-2.63866
NHSL1	2.24081e-83	-0.222327	-1.20796
CLIC1	2.58674e-83	0.241262	0.40655
DPP3	3.26149e-83	-0.196249	-0.380156
AVL9	3.41086e-83	-0.206962	-0.744743
DLL3	3.53364e-83	-0.345787	-2.15831
RPL9-PS6	3.94417e-83	0.163121	0.297811
ZBTB11	3.97125e-83	0.175936	0.738196
SEMA3G	4.61012e-83	0.00892041	2.16538
SUFU	4.62909e-83	0.190838	0.734206
POLE4	4.93824e-83	0.208947	0.400484
NCK2	5.1429e-83	0.107216	0.883599
LPGAT1	5.15083e-83	-0.236785	-0.968526
GM10273	5.75378e-83	0.0806966	0.982697
CAMK2N1	6.46515e-83	-0.256194	-1.97358
SGK3	7.54535e-83	-0.424161	-2.99037
MMD	8.06023e-83	0.195859	0.722337
RASAL2	9.04869e-83	-0.221067	-0.659109
H2AFZ	1.06027e-82	0.111988	0.159011
HIST1H4D	1.13349e-82	-0.280546	-0.625958
PPAN	1.34493e-82	0.20624	0.410599
DDX10	1.38856e-82	0.19967	0.460373
SPIN2C	1.39913e-82	-0.262548	-1.05564
RAB3IL1	2.14208e-82	-0.269084	-1.58581
NXT1	2.17022e-82	0.183323	0.369155
SNCB	2.29047e-82	-0.325035	-3.21807
NOP58	2.72344e-82	0.155148	0.28194
ARL5B	2.99938e-82	0.215956	0.675887
TNRC18	3.12997e-82	0.248435	0.688338
PPM1L	3.31125e-82	-0.220704	-1.05498
CLPB	3.3307e-82	-0.187631	-0.484724
RPL7L1	4.34284e-82	0.156599	0.301958
FAM187B	5.64213e-82	-0.25397	-2.35575
OLA1	6.19565e-82	0.160312	0.304649
UBASH3B	6.27442e-82	0.063481	0.644922
IKZF5	6.96011e-82	0.157957	0.786874
FBXO2	7.07958e-82	0.0414661	1.29796
EPS8	7.45243e-82	-0.238351	-1.33244
ARPC2	7.52989e-82	0.149593	0.260119
EMP2	8.8954e-82	-0.374481	-2.84438
RPL10	9.47885e-82	-0.133447	-0.15529
THNSL1	1.01546e-81	-0.209421	-1.49373
MAP1A	1.08724e-81	-0.232416	-1.0343
KIF1A	1.2937e-81	-0.229751	-1.42512
CAPRIN1	1.45706e-81	0.191399	0.357373
KIT	1.46665e-81	-0.244154	-1.13755
PTPN2	1.50289e-81	0.223152	0.494286
GNG3	1.65186e-81	-0.220215	-0.780244
MYRF	1.84595e-81	-0.220113	-1.37658
SRSF2	2.16958e-81	0.129529	0.228022
RPS9	2.2045e-81	-0.0976417	-0.138022
CYFIP2	2.44792e-81	-0.21442	-1.21624
BHLHE41	2.46956e-81	-0.281051	-2.56117
CPNE3	3.46133e-81	-0.216024	-0.727811
CEBPB	3.48758e-81	0.0758549	1.05379
ORC6	3.84568e-81	0.181794	0.337973
GM12829	4.21869e-81	-0.444157	-3.48673
PRDM6	4.85957e-81	-0.489837	-3.35622
X4930452B06RIK	4.89103e-81	-0.212652
UMPS	6.02141e-81	0.189198	0.392116
CARHSP1	6.19622e-81	-0.197124	-0.397409
ORC2	6.34158e-81	0.224537	0.443624
CIT	7.80092e-81	-0.210863	-0.407028
TCF7	8.52607e-81	0.161851	0.782244
TCTE2	8.87541e-81	-0.25749	-2.49051
ANKRD24	9.34426e-81	0.14275	0.800353
CLIP4	9.99951e-81	-0.249416	-2.24914
NELFCD	1.02061e-80	-0.185261	-0.36459
STOX2	1.17394e-80	-0.200119	-0.414911
STIP1	1.25071e-80	-0.148771	-0.189494
TRPM7	1.46546e-80	0.234464	0.507345
MIR17HG	1.49578e-80	0.308603	0.625099
RPL8	1.51754e-80	-0.0879496	-0.113723
FAM136A	1.73752e-80	0.161659	0.300891
VSTM2L	1.74323e-80	0.0258902	1.67384
MCF2L	1.75769e-80	-0.231932	-1.96163
TADA3	2.28205e-80	-0.198311	-0.496312
PIK3C2B	2.31381e-80	-0.261495	-2.1844
PUS3	3.24155e-80	0.205452	0.628774
GRK5	4.07788e-80	0.0528282	1.1014
TMPO	4.1234e-80	0.157021	0.313436
SDHC	4.69807e-80	-0.175655	-0.304021
GNB5	4.95699e-80	-0.20278	-0.864966
PLA2G16	7.82139e-80	-0.201954	-1.01263
FOS	8.08007e-80	-0.531643	-3.80468
ARHGAP29	8.66423e-80	-0.232242	-0.587806
UCHL3	9.00067e-80	0.163055	0.300907
EIF4E2	1.01423e-79	0.151962	0.279235
CASK	1.17625e-79	0.173314	0.779177
CENPF	1.47429e-79	-0.221215	-0.276979
B3GNT7	1.63053e-79	-0.266183	-2.11042
DR1	1.67408e-79	0.232343	0.569514
MED8	1.9562e-79	0.15219	0.293735
ACP6	2.09245e-79	-0.205501	-0.78097
MYBBP1A	2.10353e-79	0.183778	0.37758
INPP1	2.3773e-79	0.0708788	0.988955
FRK	2.57211e-79	0.0166512	1.89718
MSN	2.99728e-79	0.299461	0.558324
LMO2	3.17428e-79	-0.531616	-2.69265
PRKAA2	3.35769e-79	-0.480399	-4.08701
SMDT1	3.68394e-79	-0.139632	-0.22695
DMRT3	3.81199e-79	-0.409207	-3.62013
RAB7B	3.93764e-79	0.000920804	4.45571
ARHGEF5	4.10196e-79	-0.29259	-2.16997
CACNA2D2	4.26403e-79	-0.362739	-3.17442
RAB9	4.55662e-79	0.221883	0.480393
CORO1A	5.42359e-79	-0.200632	-1.41506
PCK2	6.29644e-79	-0.201301	-0.936429
HINT2	6.30681e-79	-0.19017	-0.420568
TRIM71	6.54521e-79	0.20512	0.385839
VRTN	6.67803e-79	-0.252013	-1.96422
JAKMIP1	6.89206e-79	-0.462614	-4.26398
ARAP1	7.16509e-79	0.0433661	1.23858
BRI3	7.24162e-79	-0.1635	-0.284046
SERPINB6A	7.43479e-79	-0.200214	-0.498228
X1110008F13RIK	7.65737e-79	0.136365
PAWR	8.1591e-79	-0.221376	-0.668363
OCLN	1.09202e-78	-0.675523	-5.79453
PLPP1	1.58348e-78	-0.198509	-1.04333
FRRS1L	1.67133e-78	-0.299527	-2.61752
GNA14	1.78411e-78	0.0501093	1.02427
AMER2	1.90205e-78	-0.218069	-1.43876
ZSCAN10	1.94683e-78	-0.225638	-1.12291
MAPK1IP1L	1.96361e-78	0.260111	0.459715
MARCKS	2.46592e-78	0.263737	0.424858
CNN1	2.47991e-78	-0.463378	-3.40837
X9930012K11RIK	2.81351e-78	0.043069
GM10146	2.82689e-78	0.18905	0.652175
VAMP3	3.14178e-78	0.226789	0.448674
WFDC1	3.14505e-78	0.00854695	2.46936
STAU2	3.33624e-78	-0.196829	-1.04824
MLLT3	3.37833e-78	-0.235297	-0.575934
CROCC	3.69424e-78	-0.204297	-0.833073
EPHX2	3.77271e-78	-0.357433	-3.22118
CPN1	5.74337e-78	-0.69148	-4.46583
HIPK2	5.97743e-78	-0.208752	-0.423947
LIX1L	6.19385e-78	0.127192	0.770165
GM9493	6.78977e-78	0.152232	0.28318
DAAM1	7.15662e-78	-0.23979	-0.650176
CTSC	7.42154e-78	0.0755146	0.787336
MYO18A	9.32396e-78	0.16083	0.666366
TSHZ2	9.64122e-78	-0.225893	-1.22655
C1D	9.87901e-78	0.161247	0.317437
X1010001N08RIK	1.11689e-77	-0.914901
DOCK1	1.18519e-77	0.211996	0.660152
PRNP	1.26768e-77	-0.26497	-1.82452
TSR2	1.28305e-77	0.229262	0.598191
UTP14A	1.3726e-77	0.213784	0.439921
CMTM4	1.52521e-77	-0.208916	-0.62639
DGAT2	1.52553e-77	0.0931843	0.840103
SLC25A11	1.52845e-77	-0.177344	-0.343556
GLUD1	1.77798e-77	0.251107	0.46832
GPR153	1.94566e-77	-0.229639	-2.05435
FAM20C	1.9491e-77	-0.510647	-4.6349
RPP25	2.69549e-77	-0.235011	-2.09487
FEZF2	3.65851e-77	-0.748161	-4.67965
ADAM15	3.96242e-77	-0.200649	-1.09777
CRYAB	5.76166e-77	-0.607234	-3.22542
TPM4	5.98284e-77	0.213793	0.383673
NR4A1	6.04463e-77	0.0251586	1.53071
METTL9	6.3821e-77	0.155173	0.287466
GM27032	6.93551e-77	-0.273105	-1.97089
RCAN2	7.14806e-77	-0.429008	-3.92129
CHST2	7.37512e-77	-0.135151	-0.535667
OLFML2A	9.97095e-77	-0.391981	-4.07047
CERCAM	1.01104e-76	-0.247907	-2.2475
SHFM1	1.10226e-76	0.1121	0.174424
RALGPS1	1.11288e-76	-0.239316	-2.2949
IL17RD	1.51011e-76	-0.218929	-1.03721
RPF2	1.64375e-76	0.19783	0.410039
RNMT	1.82485e-76	0.227944	0.448623
JDP2	1.89237e-76	0.0459474	0.641758
GOLGA4	2.25683e-76	-0.224525	-0.396366
SMIM22	2.38369e-76	-0.245537	-1.72239
GUCY1B3	2.47411e-76	-0.413385	-3.75335
LTBP1	2.61587e-76	-0.222293	-0.981298
PLXNB1	2.64227e-76	-0.201127	-0.898249
PRMT8	2.68528e-76	-0.314079	-3.16757
CADM1	2.87298e-76	-0.23539	-0.40635
ACOT13	2.98285e-76	-0.190491	-0.574184
PTPRS	3.1209e-76	-0.197823	-0.436273
ARRDC1	3.13969e-76	-0.246484	-2.2599
NCALD	3.16318e-76	-0.236823	-1.51252
CLIP3	3.22304e-76	-0.192977	-0.555108
AUTS2	4.18718e-76	-0.178757	-0.306109
GPX8	4.33573e-76	-0.168641	-0.551365
X1110004F10RIK	4.6724e-76	0.130928
FLRT1	7.3365e-76	-0.363175	-2.53614
RFXAP	8.22533e-76	-0.186784	-0.391901
RCAN1	8.36459e-76	-0.187506	-0.5531
MFSD1	8.68016e-76	0.232627	0.634362
CBX6	8.86786e-76	-0.201353	-0.842025
ACTL6A	9.05401e-76	0.15126	0.297467
MT-ND1	1.14971e-75	0.200917	0.291552
MYOCD	1.26502e-75	-1.12302	-5.72399
CLDN10	1.52628e-75	-0.351956	-2.42506
PDHA1	1.55083e-75	0.216585	0.438725
MARVELD2	1.76231e-75	-0.359584	-3.31549
NDUFA12	1.83377e-75	-0.17208	-0.2888
PPP2R2D	2.39273e-75	-0.164889	-0.284876
PHF21A	2.75822e-75	-0.206596	-0.494723
FBRSL1	3.02366e-75	-0.203065	-0.641739
ACTN1	3.24205e-75	-0.208553	-0.371132
LMO1	3.55262e-75	-0.335551	-1.10259
RGS17	3.81089e-75	-0.239246	-1.75045
CNN2	4.01306e-75	0.0451294	-0.168384
FHDC1	4.35433e-75	-0.228986	-1.47946
ANKRD27	4.36289e-75	0.128592	0.790075
RACK1	4.6724e-75	-0.104585	-0.124292
GRB14	4.73267e-75	-0.271292	-2.21298
ANXA4	4.95113e-75	-0.253069	-2.0328
KLHDC8B	5.62626e-75	-0.232649	-1.9857
UBAC2	5.67711e-75	-0.183853	-0.40946
TSNAX	5.73048e-75	0.214544	0.480146
GM3550	5.95531e-75	0.209036	0.614471
SHTN1	6.22014e-75	-0.369485	-3.31685
TMEM237	7.25681e-75	-0.184172	-0.392719
NFKBIA	7.69259e-75	-0.217753	-0.736516
GM13889	1.3978e-74	-0.363407	-2.4875
LSP1	1.44124e-74	-0.239194	-1.93071
RFC4	1.45603e-74	-0.16608	-0.303068
[truncated: 12,975 more rows]

## Sheet: PhenoGraph cluster 3
gene	P-value (FDR adjusted)	MAST Hurdle	logFC
PTN	0	2.20286	3.37743
TMSB4X	0	1.35882	1.84763
CRABP2	0	1.35342	1.79783
MAP1B	0	1.26869	1.47026
CRABP1	0	1.22769	1.69705
SOX2	0	0.964506	1.98404
SOX11	0	0.951424	0.897456
CCND1	0	0.821136	1.11812
CDH2	0	0.734613	1.38935
TLE4	0	0.720674	1.40785
MKRN1	0	0.674633	1.11017
STMN2	0	0.662499	1.58463
TSPAN13	0	0.661428	1.62945
SAP30	0	0.654424	0.971173
BEX3	0	0.62576	0.930009
SFRP2	0	0.591285	2.1176
VEZF1	0	0.578633	1.05967
PTPN13	0	0.573427	1.2224
KLF3	0	0.570695	1.55075
SOX3	0	0.570619	2.1292
LPAR4	0	0.566367	1.50511
FNDC3C1	0	0.561284	1.33658
MLLT3	0	0.558052	2.11206
NRIP1	0	0.550014	1.3217
NR2F1	0	0.545168	2.78438
SALL2	0	0.540278	1.36557
EFNB1	0	0.537986	1.60161
VANGL2	0	0.536509	1.24119
CHD3	0	0.515325	1.58656
SPRED1	0	0.489283	1.1685
EFNA5	0	0.476361	1.39055
BNIP3L	0	0.474702	0.754144
PNP	0	0.472654	0.896904
IGDCC3	0	0.471296	1.55595
EFNB2	0	0.465181	1.67754
RTN3	0	0.451405	0.786284
GM2694	0	0.441655	2.48453
FZD3	0	0.439139	1.54304
NR2F6	0	0.434668	0.8815
ILDR2	0	0.425322	2.72685
CELF2	0	0.424947	1.56127
MAST4	0	0.41887	1.14721
CNTFR	0	0.415878	1.42131
HNRNPH3	0	0.408999	0.730646
FOXB1	0	0.391956	1.96504
ALYREF	0	0.391897	0.656498
SOX21	0	0.388815	2.97719
X1700025G04RIK	0	0.376242
LIX1	0	0.375998	2.13179
CUEDC1	0	0.374872	1.52813
SPRY2	0	0.373329	2.8125
FAM181B	0	0.368093	2.2772
SOX1	0	0.34944	3.13735
CHST2	0	0.341212	2.09557
FGF8	0	0.3366	2.10736
NAV2	0	0.329466	1.42459
MARCKSL1	0	0.329347	0.47549
WWC1	0	0.297796	1.35208
SKIDA1	0	0.294274	1.7299
JAG1	0	0.293931	2.00226
MYCL	0	0.291957	2.35505
RAI14	0	0.291511	1.34734
ZFP423	0	0.289188	1.57402
MN1	0	0.288362	2.03879
SOX13	0	0.287674	1.98766
SP8	0	0.279344	2.05512
HES3	0	0.277372	3.19412
ZBTB16	0	0.271524	2.10643
VSTM2B	0	0.263303	2.13467
RTN1	0	0.255182	1.67581
PEG12	0	0.2459	1.94613
EN1	0	0.245218	3.51273
EFNB3	0	0.237448	1.74851
CELSR2	0	0.234598	1.60579
IRX2	0	0.232123	2.65375
RFX4	0	0.23026	2.59972
HES5	0	0.226983	2.26058
GBX2	0	0.226095	2.02821
PLCH1	0	0.225551	1.88326
CELSR1	0	0.221858	2.04575
SHROOM3	0	0.221517	1.67772
FGF15	0	0.211466	2.38782
MIR124-2HG	0	0.208965	2.45366
IL17RD	0	0.191316	1.93168
FABP7	0	0.168085	2.50446
EPB41L4A	0	0.159737	2.34112
MYLK	0	0.159115	2.16429
SCG5	0	0.153929	1.83148
DTX4	0	0.142789	1.70397
AQP11	0	0.139786	2.02701
PDZPH1	0	0.134638	2.35508
FEZ1	0	0.129032	3.23952
ADGRV1	0	0.120367	2.12682
POU3F2	0	0.120085	3.75893
BOC	0	0.11549	2.08448
MKRN3	0	0.11489	2.06089
SGTB	0	0.0920792	2.01512
PAX5	0	0.0909603	4.0952
THBS1	0	0.0847665	2.69394
ZSWIM5	0	0.0816512	2.14087
OPCML	0	0.0766145	2.98319
CLDN10	0	0.0763246	3.5643
PANTR1	0	0.0746908	2.47634
FMN2	0	0.0712782	2.21697
GDF10	0	0.0708149	3.23255
C130026L21RIK	0	0.0677323	3.00769
FLRT1	0	0.0652648	3.07684
PAX8	0	0.0591742	3.73945
NKX6-2	0	0.057319	3.41243
FAM181A	0	0.0467536	3.17647
MYO5B	0	0.0462719	3.11009
EN2	0	0.0451285	4.1596
MSX3	0	0.0440724	4.03481
PCDH17	0	0.0434748	3.22066
VGLL3	0	0.0418471	5.03685
SP9	0	0.032513	4.15122
POU3F3	0	0.0324416	2.81384
FGF17	0	0.0264314	4.18173
MAPK10	0	0.0262557	4.08666
ME3	0	0.025702	3.25268
KLHL14	0	0.025373	3.49233
GRIN2A	0	0.0216171	4.0558
RPL37A	0	-0.220003	-0.321147
X1810058I24RIK	0	-0.33421
MT-ND2	0	-0.34607	-0.493356
ACTG1	0	-0.347259	-0.509084
TMSB10	0	-0.353126	-0.574175
MT-ATP6	0	-0.35599	-0.509411
MT-ND4	0	-0.384739	-0.551243
MRPL34	0	-0.388274	-0.643931
EIF4EBP1	0	-0.417919	-0.717415
TSPO	0	-0.429527	-1.43077
ACADL	0	-0.434434	-1.66532
SMS	0	-0.466693	-0.722187
MT-CO3	0	-0.473736	-0.681805
CD63	0	-0.490277	-1.12784
SERPINB6A	0	-0.499161	-1.75324
MT-CO1	0	-0.508367	-0.733363
ARID3A	0	-0.516178	-1.56379
REEP5	0	-0.528511	-1.40282
X1700027J19RIK	0	-0.540298
EGFL7	0	-0.568528	-1.67724
IQGAP1	0	-0.582384	-2.02909
MT-ND1	0	-0.587797	-0.845654
NECTIN2	0	-0.593756	-1.53788
GM10076	0	-0.604763	-0.903305
SLC25A4	0	-0.633147	-0.98549
CALD1	0	-0.670164	-1.17994
TES	0	-0.680422	-2.90713
PKDCC	0	-0.712853	-1.66466
BMP7	0	-0.722371	-3.69748
GPC3	0	-0.736211	-1.53609
FBN2	0	-0.777875	-2.10169
VAMP8	0	-0.794759	-2.51657
PDLIM1	0	-0.815174	-4.22772
CSRP2	0	-0.845275	-1.69005
APOE	0	-0.850853	-1.49414
PPP1R14A	0	-0.853735	-5.21328
CDKN1C	0	-0.861061	-1.82248
S100A10	0	-0.877137	-2.69755
DLC1	0	-0.91109	-3.39192
SHISA2	0	-0.961305	-3.01772
CGNL1	0	-0.971639	-4.74505
VIM	0	-0.973717	-2.50246
TPM1	0	-0.988872	-1.72677
OTX2	0	-1.04892	-2.75039
CHCHD10	0	-1.05216	-3.69619
BASP1	0	-1.08361	-2.1133
IGF2	0	-1.12162	-3.24879
FOXC1	0	-1.14799	-4.69482
PEG3	0	-1.17604	-2.23918
CNN2	0	-1.1884	-3.49653
DUSP9	0	-1.21518	-4.50358
TWIST1	0	-1.28796	-2.75442
HOXB2	0	-1.36087	-4.84344
KRT18	0	-1.39537	-3.3471
HAPLN1	0	-1.42882	-5.0581
H19	0	-1.51981	-3.76133
KRT8	0	-1.5882	-4.42353
EPCAM	0	-1.61546	-4.19307
PHLDA2	0	-1.94573	-5.36128
ALDH1A2	0	-2.04358	-5.86137
EVA1B	4.0678e-308	-0.666454	-2.16596
RBPMS	6.00226e-308	-0.493014	-1.13213
NID2	1.63555e-306	-0.595715	-2.54363
FOXC2	3.99569e-305	-1.51433	-5.59469
GATA6	3.56315e-304	-1.71061	-6.41911
PLP1	5.51549e-304	0.270295	1.54438
ACER2	1.70688e-302	-0.739359	-1.87875
QK	1.79844e-302	0.430606	0.741985
ANXA5	2.2996e-302	-0.654226	-2.58788
H2-K1	9.29497e-302	0.465853	1.28413
BEX1	9.90578e-302	1.95801	1.0172
WHSC1	2.11181e-300	0.431102	0.791927
IGF2BP3	3.11621e-299	0.372827	0.674443
RASSF2	3.11621e-299	0.0906985	2.00654
NRP2	8.84626e-299	0.461549	1.40919
TGFB2	3.1581e-297	-1.14361	-4.67666
RPA3	3.33428e-297	0.533939	0.877359
NDN	8.37657e-297	0.540317	0.95866
CDH1	3.65707e-295	-1.23314	-5.5548
IGFBP2	9.05884e-295	-0.69807	-1.36634
MYL7	2.6043e-294	-1.43924	-4.29994
SPINK1	3.49986e-294	-1.46156	-5.05626
MT-CO2	9.14124e-294	-0.298315	-0.423672
TSC22D1	5.20977e-293	0.440248	0.798556
NAV1	8.4723e-291	0.41345	1.15072
TBCA	8.10118e-290	-0.289648	-0.448987
POU5F1	3.67891e-289	-1.0609	-2.71097
AKR1B3	1.74398e-288	0.39857	0.71587
BEX4	1.46519e-286	0.704733	0.887605
WDR76	2.69887e-286	0.436543	1.04111
ZMYND11	7.61641e-286	0.39944	0.859889
FBLIM1	1.86191e-284	-0.657873	-3.70372
ATP5K	1.96911e-283	-0.3587	-0.579824
HNRNPA1	3.99448e-283	0.241909	0.359758
MPPED2	1.51742e-282	-0.597181	-1.8712
ZFP36L1	1.23655e-281	0.59903	0.971542
IRX3	1.30079e-280	0.708298	1.30309
ZFPM1	7.50601e-280	-1.01108	-3.98639
SNRPF	1.4033e-278	0.308599	0.487085
FZD10	1.2569e-277	0.139231	1.75973
FAM212A	3.78925e-277	-1.40319	-4.45938
MEX3B	4.98965e-277	0.376148	1.24774
UCHL1	1.06794e-276	0.41465	1.34465
PFN2	1.07603e-274	0.448653	1.05303
FKBP11	1.42453e-274	-0.420535	-1.14172
FERMT2	1.93045e-273	-0.404892	-0.880648
MYL6	3.20159e-273	-0.311786	-0.469363
GOLM1	3.87096e-273	0.407802	0.779045
X2610027F03RIK	7.98315e-272	0.0206713
PDHA1	3.14202e-271	0.368105	0.711284
X5330434G04RIK	4.66735e-271	0.150714
LDHA	9.98131e-271	0.24913	0.36522
RNF165	2.22454e-270	0.382561	1.28073
ADGRL3	4.45037e-269	0.138046	1.73869
COL2A1	4.15046e-268	0.453798	1.30433
SYT11	7.49574e-268	0.282245	1.43343
HSPB1	2.71071e-267	-1.06251	-6.48619
ATP5L	1.2617e-266	-0.284493	-0.443994
HOXB1	1.26571e-266	-1.42884	-5.3512
FLNA	1.57444e-266	-0.44447	-1.06122
SCRN1	3.58032e-266	0.0552139	2.26441
TCF12	6.58653e-266	0.508005	0.871065
PRSS23	2.61058e-265	0.146864	1.85633
RGS2	4.46352e-265	0.11436	1.88854
COL4A1	8.99654e-265	-0.54962	-1.38479
LAMB1	2.81894e-264	-0.48011	-1.58449
GM26917	2.84888e-264	0.515054	0.925423
DSP	3.66585e-264	-0.722447	-3.20072
L1TD1	3.79402e-264	-1.00182	-5.46669
SEPT3	8.31513e-264	0.311178	1.27864
ATP5A1	2.07735e-263	-0.263238	-0.401253
ITGB8	2.32263e-263	0.0704491	2.16956
LGALS1	4.75246e-262	-0.502642	-1.43018
SPTBN1	3.36395e-261	-0.483198	-1.16387
F11R	6.52971e-260	-0.612907	-2.41553
ATP5B	7.18188e-260	-0.270096	-0.40783
POU3F1	1.13592e-259	0.458658	0.930952
SLC44A5	1.23239e-259	0.0390676	2.59701
SH3BGRL	4.99307e-259	0.434618	0.758977
MT-CYTB	8.19372e-259	-0.322046	-0.459045
ATPIF1	3.16906e-258	-0.251639	-0.376389
TSPAN3	5.78007e-258	0.315182	0.566875
ZFP710	1.42069e-257	0.282266	1.14324
ZCCHC7	1.99655e-257	0.367772	0.856495
FAM49B	1.2901e-255	0.35113	0.689306
EIF1B	1.44323e-255	0.327294	0.549942
ERAS	1.49347e-255	-0.963541	-3.06389
TXNDC17	2.08552e-255	-0.26837	-0.416868
HSP90AB1	1.1454e-253	-0.197343	-0.286299
NUAK2	3.10765e-252	0.193794	1.46284
TUBB6	6.56904e-252	-0.479011	-1.74993
MSI2	1.02785e-251	0.446152	0.895815
RPS18	5.04238e-251	0.175843	0.259315
FN1	1.82739e-250	-0.697815	-1.40815
NREP	1.91988e-250	0.435567	1.11955
HOXA1	4.95552e-249	-1.49384	-4.80757
ITGA9	9.30851e-248	-0.828478	-4.11723
ID2	1.79284e-247	0.875431	1.23201
AMOT	5.83061e-247	-0.625673	-1.93762
GPRC5C	1.25392e-246	-0.493264	-1.72805
GM9844	2.52991e-246	-0.385537	-0.833043
ITM2B	2.54698e-246	-0.402434	-0.980204
OLA1	2.44076e-245	0.285603	0.508909
ISYNA1	2.88919e-245	-0.3867	-0.953194
HNRNPF	2.72931e-244	0.265084	0.426058
CLDN6	1.59451e-242	-1.77351	-5.74744
EML5	2.82363e-242	0.0820295	1.85642
TMEM51	5.45676e-242	-0.777626	-4.73985
APLNR	1.02102e-241	-1.12067	-4.37474
RARG	1.09378e-240	-0.472193	-2.31473
FHOD3	2.21712e-240	0.146202	1.61986
RRBP1	1.53652e-239	-0.38664	-0.648093
TAGLN2	2.4369e-239	-0.478035	-1.10549
KBTBD11	5.66075e-239	0.140136	1.64227
SERF1	2.96232e-238	0.4871	0.874514
H2-KE6	3.9034e-237	0.310458	1.10068
CLU	8.31877e-237	-0.701446	-3.08769
SH3GLB1	1.48571e-236	-0.402607	-0.869364
SLITRK6	5.49207e-236	0.00523171	4.34906
RASGRP3	5.58881e-236	-1.17887	-5.87338
WLS	5.65768e-236	0.809166	0.974546
GLIPR2	3.51053e-235	-0.627702	-2.66069
RPS29	4.14339e-234	-0.248113	-0.36312
CRIP1	6.35835e-234	-0.539384	-2.09231
SPEG	5.24318e-232	-0.417304	-1.72213
PCP4L1	1.95164e-231	0.0232263	3.01918
PLPP2	9.69377e-231	-0.447507	-2.01934
GNAS	1.20905e-230	-0.23654	-0.350693
LPGAT1	3.44073e-230	-0.512499	-2.34581
PHLDA3	5.5153e-230	-0.578014	-2.37361
MT-ND5	1.7104e-229	-0.296719	-0.442654
CXCL12	3.70433e-229	-0.976411	-4.54456
GPM6B	9.33195e-229	0.0364886	2.41583
RPRM	2.90617e-228	0.159256	1.53739
ITGB5	8.30716e-228	-0.470261	-1.77433
G3BP1	5.01885e-227	0.265146	0.430076
ISL1	1.17547e-226	-1.36768	-5.10313
DSG2	1.39203e-226	-0.890942	-4.88386
SNAI1	4.98301e-226	-0.771541	-3.37382
EFEMP2	1.17334e-225	-0.485794	-2.6328
PAX2	1.22278e-224	0.188206	1.68909
SPSB4	1.55574e-224	0.25758	1.15708
NDUFA12	4.33134e-224	-0.304454	-0.500517
TRA2A	5.11037e-224	0.301437	0.538298
ABLIM1	9.16885e-224	0.262608	1.2208
MSI1	1.69567e-222	0.433735	0.959419
HSPG2	4.27548e-222	-0.526016	-2.65142
EMB	7.18572e-222	-0.608044	-1.02246
PRRX2	1.18404e-221	-0.633896	-1.41595
OAF	1.04103e-220	-0.445059	-1.70296
ARG1	1.34705e-219	-1.60276	-6.60327
DNAJC9	4.05676e-219	0.304802	0.55773
PKNOX2	5.99392e-219	0.206869	1.22214
RAB25	8.60766e-219	-1.09073	-4.92892
ANXA2	9.45275e-219	-0.78613	-2.88174
GSTA4	1.05194e-218	0.445115	0.726693
GM9493	1.34226e-217	0.262824	0.44984
CLIC1	1.45378e-217	-0.390312	-0.7349
TNFRSF19	5.69725e-217	0.343501	1.16286
TNNI1	1.13712e-216	-1.57825	-6.37009
ZDBF2	1.66335e-215	0.31035	1.04622
KIF1B	2.12371e-214	0.449701	0.830638
TTC3	2.26633e-214	0.294585	0.498477
MMP14	6.86962e-214	-0.443389	-1.63736
COL13A1	2.1392e-213	-0.843656	-4.64809
MT-ND6	4.1604e-213	0.534663	1.00697
TNRC18	4.60777e-213	0.312419	1.00871
FHL1	4.82269e-213	0.405331	1.02361
ARHGAP28	6.4632e-213	-0.449821	-1.77665
HNRNPK	1.54942e-211	0.201809	0.314594
GPX8	1.87263e-211	-0.42533	-1.50461
TFPI	7.78356e-211	-0.712588	-2.84319
TBX1	1.30679e-210	-1.35651	-4.80517
ATP5C1	4.42902e-210	-0.235005	-0.364732
CBX1	1.36141e-208	0.238492	0.382985
AGPAT2	1.42583e-208	-0.423607	-2.15389
IRX5	8.88457e-208	0.546618	1.11376
PDGFRA	1.36584e-207	-0.709959	-2.03605
GREB1	5.42531e-207	0.387982	0.859256
ZEB2	8.0623e-207	0.678375	0.948555
S100A11	4.46657e-206	-0.578886	-2.30843
SSSCA1	6.19526e-206	-0.302151	-0.492761
SELENOP	2.37606e-205	-0.856474	-3.27602
CLDN7	2.43565e-204	-1.77631	-5.3404
PHYHIPL	5.72452e-204	0.100382	1.59428
CFC1	9.2142e-204	-1.40381	-6.02411
SRGAP3	1.04583e-203	0.112064	1.55818
PRICKLE1	1.19487e-203	-0.608154	-3.52855
CAR4	1.94495e-203	-0.650503	-1.52599
SLC39A8	3.01209e-203	-0.681504	-2.8865
AHNAK	4.71501e-203	-1.24428	-5.00958
EYA2	4.81335e-203	-0.758494	-4.34383
ECI1	1.80012e-202	-0.426563	-1.61122
CNPY1	3.29874e-202	0.00872549	3.70927
RBM3	1.05499e-201	0.23564	0.383411
UCP2	1.39819e-201	-0.420272	-1.57081
ZCCHC18	1.80075e-201	0.140763	1.47324
ACOT9	4.36867e-201	-0.418976	-2.16534
SIRPA	5.51184e-201	0.124853	1.40536
OAT	1.03704e-200	-0.417603	-1.08167
ANXA7	2.10546e-200	-0.39334	-1.73598
HNRNPR	2.88209e-199	0.257892	0.455301
PARVB	5.50424e-199	-0.47399	-3.23446
MEOX1	1.68828e-198	-2.23643	-7.37842
PCOLCE	5.02746e-198	-0.748825	-4.17435
COPS6	5.51314e-198	-0.270778	-0.531713
PLXNA2	8.7017e-198	0.223034	1.23568
MATR3	1.50128e-197	0.27527	0.488184
PLXNC1	2.3629e-197	0.0833967	1.69607
ELAVL2	8.62917e-197	0.293426	1.12568
ANXA6	1.2376e-196	-0.552194	-2.64226
AP1M2	4.04319e-196	-0.914523	-5.14597
CAR10	1.03242e-195	0.0367294	2.58079
CBLN1	4.2307e-195	0.0950694	1.77855
FLRT3	1.05419e-194	0.439276	1.11075
HESX1	1.63751e-194	-1.50309	-4.84181
RSPO1	4.2591e-194	-0.65256	-2.76593
ZFP422	4.25954e-194	0.395991	0.763967
RRAGB	4.85229e-194	0.228786	1.24853
RBMS1	2.25262e-193	-0.425863	-0.829659
SIX1	2.88027e-193	-0.924315	-3.42714
FGF18	7.74678e-193	0.031677	2.54503
FAM84B	1.86139e-192	0.09008	1.67
EZH2	1.57439e-191	0.259669	0.449195
ADGRL2	5.49809e-191	0.428727	0.831932
PAM	5.81975e-191	0.232708	1.17363
STX3	7.43315e-191	-0.530225	-2.12801
DDAH2	2.27885e-190	-0.335447	-0.651665
GM6133	3.82276e-190	0.356267	0.836945
HNRNPAB	1.90495e-189	0.198649	0.307861
PTH1R	2.00606e-189	-0.535909	-1.80933
PLIN3	2.66631e-189	-0.349217	-0.990172
RPL9-PS6	1.21817e-188	0.256576	0.44112
MYCN	1.47992e-188	0.528141	0.957512
SCUBE2	1.75816e-188	0.0730807	1.69763
RPL37	1.555e-187	-0.190369	-0.278871
MT-ND4L	1.64238e-187	-0.283325	-0.427189
RSPO3	3.99366e-187	-1.48129	-4.91217
TMEM238	5.39277e-187	-0.498459	-2.53682
TCF15	5.58559e-187	-1.32472	-3.47778
DPYSL2	2.16255e-186	0.375825	0.858715
GNG2	3.58575e-186	-0.345188	-0.976162
LGR4	6.39768e-186	0.17524	1.21285
DACT2	7.83636e-186	-0.745671	-5.08489
KRTCAP3	3.8547e-185	-0.550254	-3.45504
SIX3	7.37753e-185	-1.5123	-3.53266
NBL1	9.83427e-185	-0.784288	-3.97729
ALX1	9.86107e-185	-1.01883	-4.78057
CAR2	1.42049e-184	-0.568881	-1.64951
RPS2	5.56229e-184	0.176807	0.258167
IDI1	1.95541e-183	0.388917	0.9366
IMPDH1	2.16697e-183	-0.34011	-1.12733
EMILIN2	4.10644e-183	0.0688889	1.82723
PFDN2	8.02318e-183	0.252868	0.444013
APOC1	9.27657e-183	-0.690038	-3.36346
PRRX1	2.26136e-182	-0.624488	-2.35048
MAPK8IP1	2.90196e-182	0.207136	1.11257
X1110008P14RIK	8.71989e-182	-0.299743
MIR17HG	1.36417e-181	0.39354	0.909651
RCSD1	1.09739e-180	-1.08474	-4.97846
COX7C	2.0426e-180	-0.185389	-0.270486
UNC5B	2.07092e-180	-0.545425	-2.69691
EPB41L3	9.57187e-180	-0.492902	-1.71658
NEBL	2.03929e-179	0.126502	1.03095
TMEM256	2.03929e-179	-0.278818	-0.512234
H2AFV	3.04752e-179	0.266585	0.392592
BMP4	8.4962e-179	-1.13963	-4.56317
RBM24	2.05106e-178	-0.725552	-2.61191
BC024139	2.22652e-178	0.0126859	2.941
PDLIM2	2.59944e-178	-0.498898	-2.66427
LLGL2	3.32744e-178	-0.544988	-2.89098
MAN2A1	1.32037e-177	0.239181	1.05001
ETS1	4.66382e-177	-1.09739	-3.69944
YDJC	1.01703e-176	-0.3828	-1.62239
FGF3	1.17262e-176	0.0953908	1.74193
PPIC	5.66001e-176	-0.471899	-1.4584
RHOBTB3	1.14458e-174	0.339615	0.633283
PDGFRB	1.25597e-174	-0.665358	-3.17075
ZDHHC2	1.3234e-174	-0.355866	-1.52003
AJAP1	1.50979e-174	0.144265	1.31559
CTXN3	4.23754e-174	0.00906624	3.18581
MACROD2	3.62668e-173	0.217536	1.05283
GM44783	4.39e-173	0.0102839	3.37973
AMER2	5.6855e-173	0.0918774	1.54708
NRARP	1.75309e-172	0.0862567	1.67421
PCNA	4.74443e-172	0.33286	0.628215
TCEA3	5.41367e-172	-0.556149	-3.24894
HAP1	6.50067e-172	0.0497293	1.94651
LDHB	7.47042e-172	-0.430126	-0.808299
GM27032	8.59403e-172	0.0781088	1.74369
GADD45G	2.75629e-171	-0.936227	-3.86669
ARGLU1	4.44526e-171	0.229198	0.384075
ADGRA2	7.67746e-171	-0.842653	-5.89674
RP23-145I16-5	1.30453e-170	-1.07829
FLRT2	1.72093e-170	-0.770457	-3.79416
FZD9	1.82181e-170	0.0578946	1.80211
SLCO5A1	6.4264e-170	0.0628883	1.74173
PODXL2	8.53107e-170	0.0946789	1.45356
DACT1	1.42285e-169	-0.533529	-2.58126
IGSF3	2.07175e-169	-0.41587	-1.56785
PCDH7	2.8515e-169	-0.64636	-2.87193
ACTN1	5.41782e-169	-0.32678	-0.741362
MORF4L2	6.64488e-169	0.27524	0.474225
FOXD1	9.47204e-169	-1.24581	-3.73642
D030056L22RIK	1.5039e-168	0.305095	0.704458
FLNC	4.05819e-168	-0.422671	-1.85702
MOGAT2	4.84822e-168	-0.394794	-1.11257
GRRP1	1.17691e-167	-0.480976	-1.59731
FUOM	1.7711e-167	-0.634624	-4.44093
DPYSL5	1.81834e-167	0.280484	1.0322
RNF32	1.83478e-167	0.0495783	1.91527
PIM2	3.15727e-167	-0.690466	-2.43166
CRB3	1.99627e-166	-1.08023	-5.06433
RPL9	2.09903e-166	0.131726	0.19242
PCNT	4.00092e-166	-0.272871	-0.955365
CDX1	4.13109e-166	-1.85629	-5.96113
CTDSPL	1.43453e-165	-0.366867	-1.27924
SALL1	1.62587e-165	-0.395578	-1.18093
PALLD	2.12713e-165	0.433606	0.942218
TDRKH	2.28252e-165	0.138118	1.30233
TEX264	5.66086e-165	-0.388653	-1.79021
LXN	6.42876e-165	-0.43646	-1.93107
EEF1B2	6.45046e-165	0.119744	0.177221
DYNLL2	1.10234e-164	0.273203	0.524106
CALM1	2.34494e-164	-0.197069	-0.285486
UBL4A	3.1208e-164	-0.278392	-0.667826
CCDC177	4.29301e-164	0.111299	1.4178
NPAS3	4.3197e-164	0.0431247	2.02325
FBLN2	1.29132e-163	0.111341	1.53799
ACLY	9.99046e-163	0.324198	0.686076
UQCR11	1.52085e-162	-0.201233	-0.297608
GNAZ	1.86617e-162	0.0503141	1.81
POP5	4.79214e-162	-0.258719	-0.482344
FRAT2	5.72382e-162	0.288483	0.97688
WSCD1	7.46459e-162	0.125097	1.3102
HAND2	8.87386e-162	-1.70648	-6.53421
NKX6-1	2.00858e-161	0.114986	1.6079
ECHDC2	2.30565e-161	-0.355208	-1.51479
CARHSP1	9.94217e-161	-0.286248	-0.674786
KDR	1.30664e-160	-1.34777	-4.297
AHI1	2.02784e-160	0.305005	0.852585
EPS8	2.16101e-160	0.119963	1.37697
A430005L14RIK	1.07436e-159	0.323131	0.624438
VAMP5	1.27319e-159	-0.863242	-3.70247
FST	1.66623e-159	0.534116	1.31306
POU3F4	2.92074e-159	0.0297937	2.32253
LSR	7.52915e-159	-0.321316	-0.777017
FZD4	7.93939e-159	-0.499935	-2.60567
EPHB1	1.07704e-158	0.19898	1.19035
IFITM1	1.37816e-158	-0.639166	-1.20309
CXCR4	2.47091e-158	0.121217	1.32823
BCL2L11	2.69336e-158	0.281186	0.904534
COX8A	3.54698e-158	-0.173413	-0.253987
TRIM37	6.5859e-158	0.303405	0.655524
MFAP4	8.16334e-158	-0.481253	-2.17227
IGF2BP1	1.39236e-157	0.244689	0.418724
CNPY2	1.45985e-157	-0.234164	-0.411951
CASP6	1.76911e-157	-0.314327	-1.18676
TTR	2.21843e-157	-1.96677	-7.02007
CAPG	4.035e-157	-0.459413	-3.02472
RP9	8.10962e-157	-0.2908	-0.829155
SMARCD3	1.05484e-156	-0.692996	-2.52111
MAGED1	1.33079e-156	-0.304798	-0.616039
PPM1L	3.42432e-156	0.13648	1.24449
ELMOD1	3.63878e-156	0.022378	2.4687
POU6F2	1.49304e-155	0.0223532	2.53172
USP29	2.07567e-155	-0.452593	-2.02743
LSAMP	2.32483e-155	0.0745237	1.59563
ELOVL2	3.11208e-155	0.114473	1.34555
SPINT2	3.85716e-155	-0.476908	-1.36543
PCSK1N	4.30515e-155	-0.559801	-1.40301
PID1	2.01869e-154	-0.568037	-3.11685
DAB2	2.17076e-154	-0.545422	-1.52007
HSP90AA1	9.18932e-154	-0.205919	-0.298666
PHF14	1.12e-153	0.257859	0.501532
ZFP219	1.65902e-153	0.31742	0.848759
ZIC2	1.70429e-153	0.327259	1.02774
LARGE2	2.35599e-153	0.134335	1.27149
SOX4	2.41269e-153	0.429191	0.571636
LHX1	2.6815e-153	-1.50129	-7.66228
SNX30	5.0066e-153	0.176598	1.00529
OAZ1	5.13958e-153	0.145687	0.21547
TMEM132C	5.72351e-153	0.150016	1.18254
HAS2	1.61541e-152	-0.660613	-2.49707
ACTB	2.09917e-152	-0.191862	-0.281666
ZFP811	3.62675e-152	0.124257	1.2953
SFRP5	3.63241e-152	-0.966997	-4.13214
SF3B6	3.75575e-152	0.213731	0.378232
BAG3	4.72917e-152	-0.362579	-1.96796
ERDR1	4.78012e-152	0.272837	0.457219
GATM	5.69644e-152	0.0928032	1.45941
PTGDS	7.70296e-152	-1.05747	-5.34953
LRRC4B	1.15758e-151	0.0801603	1.49862
LMAN1	1.6771e-151	-0.272297	-0.526408
FUBP1	2.70838e-151	0.208724	0.342254
H3F3A	3.04903e-151	0.170597	0.252652
RNF130	5.38155e-151	0.293636	0.784877
RPS21	5.79364e-151	-0.164905	-0.241446
ATP5J2	1.03146e-150	-0.162415	-0.231553
PGAM1	1.44696e-150	0.17166	0.256632
HSPA4L	2.1003e-150	0.179206	1.14436
KIF15	3.28725e-150	0.32333	0.612433
MCF2L	6.73089e-150	0.0573876	1.67643
GKAP1	1.1991e-149	0.349072	0.733886
PDLIM7	1.45041e-149	-0.335463	-0.793418
NSG1	3.07575e-149	0.158733	1.18443
ZFP41	2.9896e-148	0.17663	0.982414
MFSD2A	3.37544e-148	0.019017	2.58137
UBQLN2	4.07118e-148	0.301396	0.602308
D1ERTD622E	4.33887e-148	0.116224	1.31805
AGAP1	5.48438e-148	0.277271	0.778199
CD248	6.46889e-148	-0.750139	-5.18633
EGLN1	7.23981e-148	0.420624	0.707924
FOXD4	7.27928e-148	-1.0253	-4.22168
RPL36	8.83663e-148	-0.151055	-0.219028
SEZ6L	1.6621e-147	0.00694136	3.35124
C030018K13RIK	2.12719e-147	0.0133258	2.82043
CAMK2N2	3.58381e-147	0.189553	1.00384
MPST	4.14654e-147	0.266996	0.743509
MYL12A	4.17434e-147	-0.258862	-0.406777
FAM19A5	5.56438e-147	0.307371	0.863791
PRDM1	8.92814e-147	-0.784558	-4.53596
MAGEL2	9.80677e-147	0.0730247	1.61705
MNAT1	1.21224e-146	-0.259389	-0.634323
GJC1	1.3148e-146	0.355238	0.656192
GNG11	1.79592e-146	-0.610192	-2.34443
TIPIN	1.44147e-145	0.28056	0.528065
TSPAN9	1.57839e-145	-0.414765	-1.85704
SMARCC1	2.62334e-145	0.253911	0.438181
NUP210	1.43566e-144	0.127457	1.21763
GPX1	1.70431e-144	-0.203915	-0.303391
PAIP2	1.93005e-144	0.210531	0.368112
DLG1	3.83337e-144	0.275637	0.788681
SUMO2	4.01572e-144	0.160929	0.240452
EMILIN1	8.16566e-144	-0.453309	-1.82592
POLR2L	9.03276e-144	-0.306251	-0.666531
NKAIN4	1.17427e-143	0.0511943	1.83885
HOPX	1.76904e-143	-0.694437	-2.3872
FABP5	2.46532e-143	0.484603	0.437801
YPEL1	2.59848e-143	0.296546	0.853508
PLAC8	4.74426e-143	-0.528892	-2.3599
ACADS	8.05835e-143	-0.283678	-0.894172
SFRP1	1.06622e-142	0.65199	0.840175
DES	1.11206e-142	-0.471625	-2.34408
VANGL1	2.218e-142	-0.376942	-1.79853
FAM162A	2.23223e-142	0.28701	0.436621
TMEM88	2.59193e-142	-0.403652	-1.44429
PITX2	3.75573e-142	-1.13395	-4.6125
HIST1H2AP	1.10547e-141	-0.734815	-1.23813
SOD1	3.19719e-141	-0.277422	-0.672817
NBEA	4.25028e-141	0.164564	1.00622
SMOC1	8.55974e-141	-0.548373	-2.1215
TFDP2	1.86507e-140	0.316215	0.670963
ESRP1	2.15046e-140	-0.868436	-5.17764
HMGB3	2.23733e-140	0.224529	0.377067
NR6A1	3.51293e-140	0.368965	0.656196
TNNT2	3.90441e-140	-1.70244	-5.14033
MAGEH1	4.78765e-140	0.331389	0.768489
ATR	5.15423e-140	0.243785	0.805205
SSBP2	6.01521e-140	0.26332	0.920424
GPR153	7.86527e-140	0.0563623	1.60105
COL4A2	9.06166e-140	-0.422203	-1.34126
GDPD2	1.1803e-139	0.0292752	2.09547
NUMA1	1.33494e-139	-0.271496	-0.813519
BAMBI	2.60732e-139	-0.479908	-1.49107
TBX3	2.84509e-139	-1.03247	-5.25519
KRT19	3.18631e-139	-1.16814	-4.4894
WASF3	3.78069e-139	0.205382	0.941992
SPR	4.48403e-139	-0.260357	-0.638646
CFAP20	5.12041e-139	0.273964	0.51813
FGFR2	7.89391e-139	-0.374836	-1.29715
PLEKHA2	1.47169e-138	-0.430636	-2.84826
SERTAD1	1.73607e-138	-0.323241	-1.66827
CHRDL1	5.13526e-138	0.0893863	1.42698
CDON	5.38823e-138	0.137242	1.03927
A730049H05RIK	6.13196e-138	0.0341535	1.9893
SFPQ	7.79146e-138	0.224715	0.360915
LIN28B	9.633e-138	0.380283	0.704567
SOCS6	1.29192e-137	0.242457	0.669991
NFE2L2	1.36687e-137	-0.314174	-1.04319
PCBP3	1.88503e-137	0.15151	0.979837
FLNB	2.67402e-137	-0.354153	-1.33356
VRTN	7.49132e-137	-0.569995	-4.04506
HMCN1	1.13314e-136	-0.450034	-1.79507
CYBA	3.05692e-136	-0.333403	-0.80192
FBLN1	3.45705e-136	-0.319516	-0.662344
TMEM47	3.70892e-136	0.416873	0.769702
DOK4	7.65654e-136	-0.83669	-3.92501
KDM7A	8.5585e-136	0.245674	0.899919
MAP1LC3B	1.11486e-135	-0.221584	-0.397628
FOXF1	2.82555e-135	-1.14772	-6.02733
FZD5	4.3921e-135	-0.719801	-3.00038
JUP	5.11745e-135	-0.451664	-2.44783
SORBS2	7.97065e-135	0.131036	1.21826
RAB28	9.33337e-135	0.26649	0.724374
CLEC2L	2.83339e-134	0.0547497	1.79024
PPP1CA	3.2295e-134	-0.16312	-0.24183
PTBP2	3.37341e-134	0.297575	0.630117
HDAC2	4.42452e-134	0.236652	0.462327
FAM132A	8.0183e-134	-0.303901	-1.6706
GMFG	1.41738e-133	-0.384684	-2.02298
LRRTM1	1.95776e-133	0.00534301	3.63735
ZFP36L2	2.6131e-133	-0.365526	-1.04206
NHSL1	8.81514e-133	0.112672	1.2314
SNX3	1.03433e-132	-0.227081	-0.376321
LMO1	1.05978e-132	-0.552794	-1.82274
RBP1	1.31095e-132	0.63117	0.787377
ZC3H12C	1.76651e-132	0.0503842	1.69228
ADAM19	4.32514e-132	-0.450504	-2.72986
NDUFA13	4.41708e-132	-0.184609	-0.280428
NET1	6.0425e-132	0.256961	0.648871
LIMD2	9.54563e-132	-0.254075	-0.4496
ASCL1	9.60287e-132	0.0142816	2.9129
SEMA6A	5.00045e-131	-0.389489	-1.40285
SRI	5.0254e-131	-0.293384	-0.691889
MAML3	5.82732e-131	0.258994	0.82739
CAPN6	6.75842e-131	-0.737832	-3.34059
TMEM37	7.58948e-131	-0.448909	-2.02819
GALT	8.62688e-131	-0.342519	-2.19226
NUDT21	1.62666e-130	0.190907	0.343946
FIGN	1.6651e-130	0.345181	0.839055
MAPK13	4.55768e-130	-0.595854	-4.06081
IFI204	5.34978e-130	-0.890053	-5.13109
UBE2G1	5.46533e-130	0.268618	0.61129
MSMO1	5.78583e-130	0.206504	0.922717
CSRP1	7.61912e-130	-0.386185	-1.42244
RPL35	8.46925e-130	-0.207507	-0.303181
GNAI2	9.00276e-130	0.232937	0.376495
RASGRP2	1.02679e-129	-0.44122	-1.31493
AK4	1.27021e-129	0.267793	0.759277
PTPRN2	2.1194e-129	0.0395463	1.87976
GNPNAT1	2.55636e-129	-0.278479	-0.834386
APBA2	2.86315e-129	0.134756	1.15588
PARP1	2.95752e-129	0.250331	0.450356
RARB	3.07501e-129	-0.450136	-2.50415
TPI1	4.63785e-129	0.196373	0.300547
TGFB1	6.64288e-129	-0.921627	-4.47992
EZR	1.04049e-128	0.542043	0.862426
GATA4	1.04049e-128	-1.13203	-6.31676
CEP170B	1.89888e-128	-0.391247	-2.28362
OXCT1	2.69233e-128	-0.336377	-1.1925
AIG1	6.03153e-128	0.243376	0.730354
NPR3	9.72625e-128	-0.555779	-2.79086
CERS4	9.93819e-128	-0.356548	-1.62355
ACTA2	1.43705e-127	-1.33709	-4.1087
GM2000	2.09231e-127	0.207282	0.366798
CDC42EP1	3.88558e-127	-0.488773	-3.26426
ZSCAN10	4.6977e-127	-0.352396	-1.8847
KRIT1	5.17252e-127	0.267946	0.615501
MGST1	5.40155e-127	0.188382	1.01652
RALB	7.08302e-127	-0.352642	-1.35445
TMEM98	9.55906e-127	-0.325325	-1.99326
RHOX5	1.38793e-126	-1.28663	-5.39332
BCAS2	1.45839e-126	0.193747	0.356413
HIST1H2AK	2.86649e-126	-0.556032	-0.977956
SMC3	2.98896e-126	0.191581	0.339312
HIGD1A	3.19536e-126	0.222471	0.375368
CASP8AP2	4.3297e-126	0.287739	0.554532
SMAD7	4.75776e-126	-0.402116	-1.62939
ATOX1	7.18042e-126	-0.197058	-0.294114
CADM4	7.68101e-126	0.0326305	1.99366
PPIB	1.04153e-125	-0.195681	-0.282853
MID1IP1	1.49493e-125	-0.383496	-1.32464
PATJ	2.11478e-125	-0.416322	-2.70534
AR	2.86027e-125	0.0552826	1.58912
NDUFA10	4.42231e-125	-0.212652	-0.391527
HINT1	8.2421e-125	-0.157745	-0.227466
TFDP1	1.75987e-124	0.281442	0.531674
NKX2-5	3.61959e-124	-1.53265	-5.36394
CITED1	4.18607e-124	-0.60332	-1.92747
TMEM121	6.80018e-124	0.247041	0.851957
TXNRD1	7.22657e-124	0.243312	0.469881
IMPA2	9.49653e-124	-0.289662	-1.32676
CER1	2.45311e-123	-1.28854	-6.62099
X2200002D01RIK	2.85869e-123	-0.349969
HEBP2	2.88981e-123	-0.303371	-1.41896
MICAL1	3.75539e-123	-0.291662	-1.28295
ZFP521	5.21727e-123	0.174996	0.872482
SRSF9	5.61256e-123	0.240856	0.399304
CDH4	6.39462e-123	0.0974999	1.25267
ADGRB3	1.26619e-122	0.0348672	1.89951
TAGLN	1.55427e-122	-1.03225	-3.72089
DHX9	1.58174e-122	0.268662	0.492274
PKIA	1.63863e-122	0.120166	1.10516
MAPK12	1.65363e-122	0.222368	0.910552
CYB5R1	1.65363e-122	-0.272016	-0.992917
ANXA4	1.81548e-122	-0.540865	-3.75136
CDH20	2.22711e-122	0.0346543	1.91683
SSBP4	2.23689e-122	-0.318869	-1.31197
CETN3	2.98928e-122	0.212044	0.41702
RNF7	2.99273e-122	0.181078	0.320921
CCDC160	3.9472e-122	0.13371	1.11646
UQCR10	4.24079e-122	-0.180256	-0.263598
PRMT8	5.17083e-122	0.0371645	1.86503
MEG3	5.22423e-122	-0.44016	-0.706108
SELENOF	7.80284e-122	0.197124	0.3526
SLC25A3	8.33189e-122	-0.162209	-0.237716
TRIM2	9.84674e-122	0.228457	0.90338
FSD1L	9.84674e-122	0.149474	1.06982
TPM2	1.34164e-121	-0.302933	-0.813812
TRAK1	1.3722e-121	0.104724	0.951413
NPM1	1.68376e-121	0.14475	0.212979
CCDC50	2.07315e-121	0.249739	0.508219
MAP7D2	2.96271e-121	0.174082	1.03601
LRPAP1	3.0914e-121	-0.348656	-0.797854
DACH1	5.92004e-121	-0.4156	-1.81988
RHOD	9.43003e-121	-0.30349	-1.58169
GJB3	1.09256e-120	-0.643511	-3.45129
GPX3	1.5975e-120	-0.416793	-1.22151
CRYAB	1.61823e-120	-1.33204	-5.20576
HOXB4	1.78941e-120	-1.6144	-8.79791
MBD3	2.03108e-120	-0.196896	-0.320295
POLG	2.98301e-120	-0.364919	-1.00938
UBR7	3.71982e-120	0.256249	0.639501
TCEAL3	4.04673e-120	0.0633849	1.47683
DACH2	5.50597e-120	0.0248549	2.28598
COL26A1	8.23354e-120	-0.544666	-2.28836
RCN3	1.77047e-119	-0.300316	-0.784883
CDC42SE2	1.94211e-119	0.250469	0.62691
NCOA3	2.15553e-119	0.170151	0.824514
PNISR	2.29724e-119	0.235422	0.455764
STARD10	2.36477e-119	-0.388222	-1.53054
RAP2C	2.49618e-119	-0.308848	-0.980099
STARD8	4.6058e-119	-0.580112	-2.44955
NES	1.38471e-118	0.325648	0.813381
KRTCAP2	1.60438e-118	-0.182818	-0.271569
ANXA3	1.643e-118	-0.436288	-2.58201
CDX2	2.92609e-118	-1.84316	-8.54346
FYN	3.27827e-118	0.238506	0.72959
ARMCX1	4.38618e-118	0.267585	0.739765
DKK1	6.02654e-118	-0.61225	-2.24975
ATP6V1G1	1.00404e-117	0.180755	0.320661
GPX4	1.1166e-117	-0.199767	-0.292203
ATAD5	1.17751e-117	0.293316	0.691365
LMO3	1.20698e-117	0.0540168	1.51284
SNAI2	4.17347e-117	-0.666641	-3.1134
P3H2	4.32647e-117	-0.376683	-1.69906
FHL2	4.93375e-117	-0.4714	-2.7505
PALM3	7.07109e-117	-0.470085	-2.32624
RPL41	4.94868e-116	-0.126103	-0.183855
CCND3	5.2058e-116	-0.260318	-0.536374
NCALD	9.89256e-116	0.103954	1.34243
PTH2R	1.33236e-115	0.00212842	4.38031
SH3BP5	2.79624e-115	-0.397753	-1.81151
PTGES3	3.11406e-115	0.171113	0.275337
NRXN2	4.44786e-115	0.204119	0.925632
PMP22	4.45961e-115	-0.645574	-2.14244
AXIN2	7.19031e-115	0.28369	0.878889
MEST	7.80257e-115	1.31939	0.765723
MYL2	8.5709e-115	-1.17162	-8.61203
TPT1	9.08167e-115	0.105691	0.157102
NXN	1.29975e-114	-0.278237	-0.676293
ZSWIM6	1.9583e-114	0.241984	0.836566
PHB	2.32772e-114	-0.226286	-0.428886
HS2ST1	2.9573e-114	0.243882	0.620066
COX7B	3.45367e-114	-0.158613	-0.223632
LHX5	4.17585e-114	-0.61314	-2.52721
TUBA1C	9.74306e-114	-0.289684	-0.711709
EIF5B	1.01924e-113	-0.175499	-0.257078
PPP1R1A	1.20775e-113	-0.393219	-0.871991
PTPN18	1.49881e-113	-0.576282	-3.87377
NAT8L	2.00083e-113	0.0556616	1.48566
WNT2	3.04437e-113	-1.4004	-6.39664
TNNT3	3.08753e-113	-0.680465	-4.18845
TOMM7	3.11028e-113	-0.174489	-0.250375
MCM7	9.70504e-113	0.201127	0.353157
KDF1	1.20329e-112	-0.7757	-5.70667
PPP1R18	1.35551e-112	-0.30677	-1.52848
ETL4	1.42187e-112	-0.334923	-1.29643
PPT1	1.42309e-112	0.188324	0.757432
IRS4	1.48847e-112	-0.53148	-1.829
S100A13	2.21326e-112	-0.394684	-2.59995
RAB3IL1	3.35223e-112	-0.415464	-2.23816
CPSF6	3.47771e-112	0.218537	0.433003
LMO7	3.5441e-112	-0.388973	-2.57054
RSL24D1	4.64182e-112	0.224357	0.454177
ZBTB12	5.40322e-112	0.251947	0.515685
PLEKHA1	6.56777e-112	0.302592	0.802927
TROVE2	7.25153e-112	0.23885	0.761943
X2610318N02RIK	7.73678e-112	0.242255
DYNC2H1	1.36452e-111	0.229459	0.803877
SERPINF1	1.7471e-111	-0.46265	-3.04006
NEGR1	1.98968e-111	0.0431425	1.74317
KCNB1	2.15366e-111	0.0344922	1.77861
JDP2	2.43625e-111	-0.630766	-3.91878
BNIP3	2.62121e-111	0.397072	0.605555
GM5786	3.54549e-111	0.248755	0.715855
PRSS8	4.01773e-111	-0.572967	-3.01047
ORC6	5.13003e-111	0.23068	0.448928
ACTC1	5.40671e-111	-1.23203	-4.49904
ERBB3	5.92185e-111	-0.674513	-4.01054
RPS10	6.94336e-111	0.0926103	0.134903
GM1673	9.13886e-111	0.387311	0.607387
NDUFB10	1.13911e-110	-0.200235	-0.317681
RLN1	1.56958e-110	0.0225405	1.99957
C130073E24RIK	1.63406e-110	0.00698095	3.27286
MYO10	1.88276e-110	-0.316766	-0.670856
HNRNPA2B1	3.09731e-110	0.185618	0.290115
X1810022K09RIK	3.23492e-110	-0.219191
SON	6.8879e-110	-0.185631	-0.278856
FUT9	7.83474e-110	0.0350036	1.82154
TNRC6C	1.22402e-109	0.268706	0.524939
TEAD4	1.91248e-109	-0.522589	-4.10793
TBX20	4.11239e-109	-1.19198	-6.30391
GM10036	4.32676e-109	0.226754	0.438354
B230312C02RIK	4.56644e-109	-0.396782	-0.970923
COMMD3	6.19528e-109	-0.280254	-0.722627
WWC2	6.23142e-109	-0.263323	-0.681401
GM26700	9.44202e-109	0.0193096	2.366
BLVRB	9.84297e-109	-0.268428	-1.25726
TLN1	1.00971e-108	-0.277305	-0.592153
RPL6	1.4791e-108	-0.119746	-0.177074
PRKAR2B	1.50957e-108	0.256963	0.797892
TNNT1	1.72879e-108	-0.350823	-1.77127
POPDC2	2.77537e-108	-1.19274	-6.26851
TNFRSF21	3.62982e-108	0.0901898	0.927636
SLC24A5	5.2584e-108	0.304519	0.596371
DACT3	5.4776e-108	-0.377276	-2.40597
BCAT1	6.22067e-108	0.316076	0.640916
NDUFB9	6.4031e-108	-0.161373	-0.240276
EBF2	6.44289e-108	-0.778613	-3.93428
RNF145	6.6517e-108	0.246976	0.690931
OLFM2	9.03514e-108	0.0277098	2.02707
DCTPP1	9.81888e-108	0.241388	0.321043
NDUFS7	1.24788e-107	-0.19292	-0.304126
CD151	1.59363e-107	-0.269221	-0.818438
RPL38	1.6233e-107	-0.151879	-0.223406
MBNL2	1.65239e-107	-0.322707	-1.19589
BCAM	1.90791e-107	-0.362575	-1.44958
GAP43	2.13947e-107	-0.397446	-1.37302
ATP5O	2.566e-107	-0.173915	-0.263057
ZFP532	3.14172e-107	0.245454	0.717839
RPL17	3.33282e-107	0.100054	0.148417
BCCIP	4.12686e-107	0.257204	0.481307
TAX1BP3	4.17332e-107	-0.306067	-0.96128
ZMYND19	4.19389e-107	0.287689	0.560957
POLR2H	5.7034e-107	0.223271	0.423207
MAPK3	5.98211e-107	-0.237774	-0.508476
TBC1D16	9.60693e-107	0.251674	0.609144
MIAT	9.7281e-107	0.088648	1.22204
MEF2C	1.39486e-106	-0.486755	-1.56312
PBX4	2.97797e-106	0.0803356	1.26406
A930004D18RIK	2.99097e-106	0.0892211	1.19099
MMP16	3.2313e-106	0.0821361	1.22558
ARL6	3.56996e-106	0.242625	0.632723
PTX3	4.22195e-106	0.0137809	2.98247
SPRY1	4.40462e-106	0.15973	1.00911
RGS5	7.3793e-106	-0.953484	-5.75802
JADE1	9.0771e-106	0.27429	0.780674
BMP2	9.13111e-106	-0.69489	-3.20521
MYRF	1.18872e-105	-0.315398	-1.94536
MAP7	2.5705e-105	0.0626271	1.37713
PAICS	3.29933e-105	0.17817	0.318105
CELRR	3.60951e-105	0.0177785	2.37857
FAM89A	3.74186e-105	-0.640553	-4.68072
MRPS16	4.09957e-105	-0.191492	-0.308053
LPAR1	6.08801e-105	-0.354603	-1.00014
DSTN	6.13175e-105	-0.246422	-0.4003
FAM117A	8.27827e-105	-0.26941	-1.24335
MAGED2	9.12507e-105	-0.29329	-0.799974
LY6E	9.12947e-105	-0.299976	-0.765977
UQCRC1	1.05574e-104	-0.201725	-0.382418
WDR83OS	1.22489e-104	0.222697	0.475367
JAM2	1.25016e-104	0.0554266	1.47352
SRSF1	3.20028e-104	0.211941	0.395513
PBX3	4.39847e-104	0.317158	0.616926
EGFR	5.7474e-104	0.0127048	2.58803
FLT1	6.56823e-104	-1.1123	-4.50952
X9430020K01RIK	9.05956e-104	-0.364833
SIX2	9.94802e-104	-0.72727	-3.57364
TMEM237	1.02671e-103	0.252584	0.594106
CNKSR2	1.42033e-103	-0.310648	-1.78408
SET	1.94126e-103	0.150083	0.225021
TOX3	2.01519e-103	0.298858	0.74828
TLK1	2.33712e-103	0.234028	0.500916
BGN	3.33636e-103	-0.612432	-3.58893
RPL27-PS3	3.53175e-103	0.181448	0.320675
MIF	7.3753e-103	0.134371	0.196754
DAB1	7.73829e-103	0.193178	0.911369
SRP14	1.56596e-102	0.171065	0.303358
GM12829	2.75172e-102	-0.896406	-6.35715
CHST15	3.25771e-102	-0.414541	-2.82391
SMIM22	3.40198e-102	-0.387809	-2.58325
HAND1	3.95361e-102	-2.01821	-7.05513
GATA5	5.17444e-102	-1.5961	-7.03902
GATA3	7.76543e-102	-0.737986	-3.9665
TUBGCP2	7.80338e-102	0.214799	0.610686
EML1	8.69673e-102	0.156518	0.944582
PDGFA	9.6075e-102	-0.354109	-0.860045
EXOC6	1.54282e-101	0.0728649	1.09651
TMEM218	2.45566e-101	0.1454	0.885284
ETFA	2.45989e-101	-0.257746	-0.766022
TCF21	2.57588e-101	-0.852502	-4.71483
FAM84A	2.82115e-101	0.0215698	2.14387
TMEM119	2.93805e-101	-0.452173	-3.3603
X3110082J24RIK	4.76252e-101	0.0191736
SUPT16	5.3904e-101	0.192682	0.327699
H2AFZ	5.6411e-101	0.1274	0.184806
POLR3K	6.8935e-101	0.216897	0.44274
SEMA5B	7.43797e-101	0.0545803	1.47457
TUBA1A	8.94356e-101	0.285486	0.449712
UBE2QL1	9.37717e-101	0.0345405	1.75596
ZMYM4	1.18011e-100	0.24097	0.537774
SLAIN1	1.62369e-100	0.0917838	1.15542
MAGOH	2.79084e-100	0.162862	0.287245
ANO1	2.95613e-100	0.0328464	1.77111
AGO1	4.15627e-100	0.191754	0.758563
RFC4	4.47696e-100	0.210418	0.424691
PRR7	4.83384e-100	0.261949	0.746131
PIPOX	5.19285e-100	0.0809784	1.22175
RRM2	5.42784e-100	0.26557	0.460184
SOX9	6.17859e-100	-0.464496	-1.18819
LDB1	7.50584e-100	0.25456	0.580611
CCDC90B	7.619e-100	0.230116	0.582659
TCEAL8	8.54224e-100	0.194836	0.343766
TRIM8	1.01249e-99	0.211356	0.691164
WRB	1.18058e-99	0.232113	0.612849
ITPR3	1.38618e-99	-0.353765	-2.80518
LMO4	1.71224e-99	-0.329181	-0.538078
ARPC1B	2.55264e-99	-0.277766	-0.809174
NKD1	2.84643e-99	0.209238	0.788268
MSRB1	2.87155e-99	-0.239005	-0.783866
DYNC1H1	6.60983e-99	-0.243907	-0.654823
UNC13B	1.133e-98	0.0859633	1.18616
TGFB1I1	1.21127e-98	-0.415851	-2.37307
KDM3A	1.34897e-98	0.213997	0.736595
COX5B	2.38042e-98	-0.153044	-0.224082
ARHGAP31	2.51249e-98	-0.563912	-2.77715
CXADR	2.66956e-98	0.280536	0.671203
SCLT1	3.07629e-98	0.240719	0.694565
AEBP1	5.11057e-98	-0.345939	-2.19226
RAX	5.15129e-98	-0.973745	-3.63236
ITGA5	5.53069e-98	-0.265168	-1.28207
LSM8	6.08466e-98	0.190948	0.368762
CAMTA1	7.05008e-98	0.25991	0.570699
HCFC1R1	7.38305e-98	-0.276318	-0.888175
MED30	8.03694e-98	0.276634	0.531671
PPA1	1.01799e-97	0.174034	0.305018
PABPC1	1.08032e-97	0.177275	0.282366
CREB3L1	1.6251e-97	-0.531474	-3.92289
ACAA2	1.75939e-97	-0.283864	-0.900457
FAM13C	2.5471e-97	0.0608955	1.38633
NOVA2	2.58494e-97	0.0735482	1.2029
PDIA3	2.69416e-97	-0.198341	-0.298216
TUBA1B	3.33872e-97	0.151177	0.23445
ARHGEF5	3.63995e-97	-0.463848	-3.25094
MYH9	3.97288e-97	-0.279712	-0.628166
SLC38A1	5.88372e-97	0.266138	0.500181
CACNA2D1	7.5751e-97	-0.478224	-4.1195
FZD2	7.74131e-97	-0.270117	-0.464807
USP37	7.94127e-97	0.224301	0.601531
FRRS1L	7.94127e-97	0.050237	1.55464
SMIM1	1.07915e-96	-0.321781	-1.65288
PLEKHA8	1.11871e-96	0.225072	0.620103
NDUFV3	1.24628e-96	-0.194296	-0.322199
AKAP12	1.61512e-96	-0.324162	-0.916947
LMO2	1.78996e-96	-0.789859	-3.44656
MAT2B	2.96403e-96	0.234409	0.535621
IVNS1ABP	3.02011e-96	0.229705	0.469005
NRCAM	3.14137e-96	0.0876309	1.18047
FKBP5	4.23585e-96	0.217401	0.709728
DYNLL1	4.30893e-96	-0.134435	-0.194413
LRP4	7.61685e-96	0.104387	1.03147
S100A6	8.5806e-96	-0.319686	-1.0944
SSR2	9.51476e-96	-0.185733	-0.294019
CPED1	9.64234e-96	-0.688741	-3.96785
GTF3C6	1.2387e-95	-0.184538	-0.337613
USMG5	1.62966e-95	-0.168627	-0.245145
PCNP	1.67303e-95	0.211739	0.42208
TMPO	1.693e-95	0.176318	0.326892
MECOM	1.82074e-95	-0.384538	-2.38304
ABCA2	2.87965e-95	0.044224	1.46135
TBL1XR1	2.93271e-95	0.211387	0.690531
SQLE	3.50276e-95	0.217864	0.648445
GM30340	3.78154e-95	0.00904248	2.71293
SATB1	4.3394e-95	0.208516	0.739118
TRAF4	5.52795e-95	-0.246902	-0.531775
CDK5RAP3	5.96267e-95	0.202512	0.476511
TMEM128	8.31158e-95	0.270326	0.570246
COL1A2	9.88337e-95	-0.446031	-1.79225
SNHG20	1.06291e-94	0.238363	0.574999
HMHA1	1.20907e-94	-0.270213	-1.84297
GPBP1	1.6334e-94	0.21644	0.453107
TPM4	1.91554e-94	-0.239937	-0.400645
HNRNPH1	2.00906e-94	0.200242	0.356053
PDK1	2.23977e-94	0.267882	0.702012
STRAP	2.27816e-94	0.174395	0.335933
RBM15	2.4218e-94	0.233239	0.687003
USP6NL	2.67447e-94	0.147128	0.802736
NPL	2.76154e-94	0.0875363	0.926346
NPDC1	2.84929e-94	0.15497	0.895193
UBN2	2.93233e-94	0.221484	0.475492
LSM14B	3.98682e-94	0.229349	0.658779
PTMA	3.9888e-94	0.12986	0.190044
PRDM6	4.05276e-94	-0.792991	-4.44479
USP44	4.36514e-94	0.116086	1.03217
HNRNPD	4.63665e-94	0.155538	0.251885
VEGFC	5.66697e-94	-0.389728	-2.1186
KHDRBS3	5.78495e-94	0.308191	0.59329
SELENOS	5.94192e-94	-0.232781	-0.446332
RNH1	8.90825e-94	-0.25006	-0.717523
HOXB3	9.84355e-94	-0.82352	-5.57959
COX4I1	1.18206e-93	-0.125991	-0.182827
ASB4	1.18835e-93	-0.413574	-2.11168
ANP32E	1.19136e-93	0.198522	0.360443
PRDX6	1.27083e-93	-0.170974	-0.232283
RPL27	1.80727e-93	0.154921	0.248333
UBALD2	2.58584e-93	-0.230057	-0.484095
ERMN	3.98337e-93	-0.999671	-5.41061
DTNA	4.28294e-93	0.0378618	1.6482
RRAGD	4.31744e-93	0.355962	0.613758
EMID1	5.04522e-93	0.0809609	1.1745
COL23A1	7.81796e-93	-0.345233	-1.37685
SLC25A39	7.85922e-93	-0.201719	-0.389117
SLITRK5	8.76729e-93	0.0778642	1.2319
NDUFA11	9.4734e-93	-0.166094	-0.247922
ATP6V0E2	9.97841e-93	0.0665007	1.26483
SEPT11	1.51866e-92	0.240085	0.458683
PIM1	1.59273e-92	-0.337198	-1.02847
FAM167A	1.71895e-92	0.0163721	2.14401
MYO1C	2.33765e-92	-0.327783	-1.544
OBSL1	2.37572e-92	-0.251704	-0.889489
INF2	3.69257e-92	-0.261121	-1.67972
COL9A1	5.35118e-92	-0.424302	-2.44008
KDELR3	5.58374e-92	-0.43932	-2.665
DAD1	6.48026e-92	-0.167615	-0.25799
ZIC5	6.54215e-92	0.165301	0.827332
SMARCD2	8.52564e-92	-0.251384	-0.94921
FIGNL2	8.59737e-92	0.220346	0.625507
AS3MT	9.11731e-92	-0.245885	-0.885279
PHF6	9.71674e-92	0.28861	0.543111
TRIM71	1.07867e-91	0.21177	0.413949
GOLGA7	1.18538e-91	0.209275	0.468682
GSTP1	1.34664e-91	-0.256406	-1.0314
PEA15A	2.41109e-91	0.207782	0.720443
CECR2	2.69249e-91	0.296784	0.570335
USP1	3.52527e-91	0.2365	0.465004
GSE1	4.13936e-91	-0.274963	-1.60577
ARL4C	6.59923e-91	0.305878	0.686171
HDAC6	7.22393e-91	-0.294919	-0.860572
SEMA3E	8.80142e-91	-0.597854	-4.05376
IRF2BPL	1.0919e-90	0.144463	0.85731
VCL	1.53763e-90	-0.258388	-0.822229
BHLHE41	1.82078e-90	0.0515415	1.3931
TTC32	2.37873e-90	0.206407	0.696604
TCEAL1	2.47284e-90	0.11356	0.930949
POLR2I	3.12139e-90	-0.1755	-0.281538
MT-ATP8	3.15447e-90	-0.21602	-0.450461
FEZF1	3.59355e-90	-0.662849	-3.21298
R3HDM1	3.71177e-90	0.234058	0.501805
ZFP280C	3.85807e-90	0.236661	0.686454
X2700038G22RIK	5.44701e-90	0.236451
CACNA1G	6.86531e-90	0.0538293	1.34997
NDUFC1	7.41947e-90	-0.160158	-0.238698
PFKL	7.77657e-90	0.197726	0.364669
TUBA4A	1.14382e-89	-0.367754	-2.74434
AKAP6	1.46449e-89	0.012556	2.39258
TMEM258	1.57206e-89	-0.161162	-0.224081
HPN	1.79646e-89	-0.634897	-5.00959
BAG1	1.90057e-89	-0.162726	-0.237488
ENSA	2.24972e-89	0.224667	0.573079
HSD11B2	2.55573e-89	-0.361532	-1.24359
RBPMS2	2.65344e-89	-0.27036	-0.67093
LASP1	3.28474e-89	-0.26281	-0.841055
CHD9	3.89176e-89	0.199441	0.775986
ATP8A1	3.90909e-89	0.0736212	1.20748
BRCA2	3.96304e-89	0.226099	0.554727
LHFP	4.64479e-89	-0.309374	-1.7271
ST14	7.15558e-89	-0.613728	-4.24836
CSRNP3	7.46571e-89	0.0462151	1.41541
LCORL	7.51529e-89	0.182998	0.76507
WSB1	8.55362e-89	0.248636	0.599486
CDK2AP1	8.9474e-89	0.216489	0.381987
COL9A3	9.54078e-89	-0.284377	-1.9291
CPA2	9.63467e-89	-0.483097	-3.28958
CDA	1.00988e-88	-0.349241	-1.86003
EMP3	1.18252e-88	-0.396507	-3.36198
PSIP1	1.21936e-88	0.207412	0.338329
BDNF	1.31229e-88	0.052312	1.41678
MID1	1.97677e-88	0.250186	0.633922
CDH3	2.49235e-88	-0.790727	-5.05333
RFX3	2.85092e-88	0.167907	0.817793
SLIT3	3.00499e-88	-0.319189	-1.56375
NRK	3.22164e-88	-0.856534	-4.65351
ARHGEF16	4.78361e-88	-0.52187	-3.99882
CDC26	5.10159e-88	0.196375	0.384871
MME	5.56772e-88	-0.424007	-2.58585
PKIG	1.11901e-87	0.206522	0.424142
MCM6	1.27242e-87	0.20425	0.40419
NOVA1	1.2936e-87	0.0549372	1.32082
MTA1	1.57349e-87	0.1985	0.421992
UBR5	1.58449e-87	0.235927	0.509605
NEXN	2.25012e-87	-0.468618	-1.71263
NTRK3	2.30268e-87	0.0488613	1.37664
RGS3	2.63339e-87	-0.284798	-1.47489
ZSWIM7	3.39939e-87	-0.237601	-0.81255
DNMT1	3.46181e-87	0.223477	0.438658
MT3	4.40925e-87	0.047089	1.5015
ASPHD2	4.80452e-87	0.0856521	1.04854
CACNG4	5.14795e-87	0.117558	1.04179
PCDH1	5.163e-87	-0.29768	-1.66981
MBTD1	5.16522e-87	0.237746	0.49891
MTCL1	6.31158e-87	0.236434	0.723391
ACTN4	8.07927e-87	-0.210096	-0.409274
RUNX1T1	8.32121e-87	-0.39985	-2.22661
CKAP5	9.26487e-87	0.221449	0.453409
CKB	1.04267e-86	-0.337524	-1.11805
RIN3	1.04307e-86	-0.389353	-3.13118
S1PR2	1.14591e-86	-0.265971	-1.24072
EIF4A2	1.65782e-86	0.210926	0.441646
S100A1	1.83056e-86	-0.273376	-1.49509
ETV2	1.88798e-86	-0.556269	-2.20598
ADRM1	2.35496e-86	-0.202847	-0.385082
VCAN	2.55098e-86	-0.369292	-0.774276
TMEM243	2.88054e-86	0.199804	0.641848
CBFA2T3	3.84063e-86	-0.414742	-2.87721
PLEKHG2	4.24675e-86	-0.247391	-0.922818
MYO18A	4.31766e-86	-0.286976	-1.15718
TBPL1	4.55381e-86	0.214122	0.476985
APLP2	4.84507e-86	-0.202757	-0.380689
NUAK1	5.13332e-86	0.114414	1.12191
MYO1B	5.82072e-86	-0.244214	-0.640171
PGK1-RS7	7.62078e-86	0.122735	0.889078
H2AFX	7.7231e-86	0.19123	0.322996
LAD1	7.86836e-86	-0.705379	-5.64702
ACOT7	8.11987e-86	0.18354	0.732225
LHX1OS	1.04981e-85	-0.774037	-8.0444
CYB5A	1.13867e-85	-0.192996	-0.32132
PLEKHG3	1.17853e-85	-0.253387	-1.55746
TSPAN5	1.36119e-85	0.248141	0.667919
MYEF2	1.78785e-85	0.22219	0.450305
ZFHX4	1.97218e-85	0.150238	0.970873
CAPNS1	2.1126e-85	-0.199664	-0.423394
ELAVL1	2.23755e-85	0.17233	0.339639
CYP26A1	2.40051e-85	-0.388871	-1.53255
MTA3	2.58545e-85	-0.238073	-0.739129
NFIB	2.68833e-85	-0.52109	-3.82212
SCN8A	3.37249e-85	0.100616	0.993311
BCL9L	5.0465e-85	-0.231963	-1.13994
EWSR1	6.94986e-85	0.174983	0.34602
DNMT3B	7.27555e-85	-0.30802	-0.532972
ZMIZ1	9.12514e-85	0.242511	0.565905
LYPD2	9.44348e-85	-0.74869	-4.87488
COX6B2	1.12904e-84	-0.248417	-0.874772
RPL36AL	1.37283e-84	-0.116469	-0.167812
PET100	1.43414e-84	-0.201498	-0.506462
FTH1	1.51049e-84	-0.169908	-0.24647
WNT6	1.52569e-84	-1.03635	-4.65237
WASF1	1.914e-84	0.203874	0.602426
FLI1	2.93495e-84	-1.15513	-4.89238
BZW2	3.63279e-84	0.169376	0.316306
GAL	4.10466e-84	-0.733487	-3.74128
SMPD3	4.34873e-84	0.0328473	1.64951
FAM64A	7.32928e-84	0.230991	0.527513
PSMC3IP	9.12968e-84	0.193226	0.491748
CTPS2	9.89395e-84	-0.220188	-1.18296
TANC1	1.01066e-83	-0.240929	-1.15728
MYL4	1.06846e-83	-0.798775	-3.26965
METTL9	1.28141e-83	0.167184	0.326506
UTF1	1.37393e-83	-0.623258	-4.37982
NDNL2	1.38673e-83	0.228441	0.489486
CBX3	1.64033e-83	0.190231	0.296368
NOTUM	1.84487e-83	0.0269722	1.86017
MYL9	2.08504e-83	-0.380339	-1.46117
PPFIBP2	2.71425e-83	-0.449419	-3.42142
GADD45B	2.90158e-83	-0.326553	-2.28841
POLD3	3.88119e-83	0.202776	0.458623
ACP5	4.14492e-83	-0.375682	-3.01693
ANKHD1	4.15643e-83	0.2096	0.537764
NRADD	4.29561e-83	-0.239118	-0.711059
GSC	4.37387e-83	-0.75843	-4.43277
RPS12-PS3	5.00421e-83	0.123802	0.200521
UBE3A	5.26389e-83	0.17536	0.33434
PTP4A2	5.5379e-83	0.204112	0.390526
CTSC	6.73237e-83	-0.36711	-2.09409
SIPA1L1	6.86144e-83	0.213242	0.58632
LONRF2	1.14231e-82	0.0190216	1.9256
CYB5R3	1.18302e-82	0.195336	0.393488
PAX3	1.3152e-82	0.206348	1.034
COX7A2	1.61638e-82	-0.112241	-0.157298
CDH22	3.01816e-82	0.0104277	2.3877
RHPN2	3.3987e-82	0.0827514	1.12822
COX5A	3.71985e-82	-0.131064	-0.185613
DEK	3.88418e-82	0.150473	0.239917
GM26735	4.74226e-82	0.141819	0.797115
TEX9	5.41676e-82	0.239022	0.575706
PTPRE	7.0591e-82	-0.483582	-3.09928
EPB41L2	8.9691e-82	-0.261355	-0.82303
PHLDA1	1.2869e-81	-0.363291	-0.812198
RABAC1	1.38309e-81	-0.23258	-0.617291
BRSK2	1.51168e-81	0.0392531	1.52103
NFIL3	1.52634e-81	-0.27408	-1.14885
NFKBIA	1.99514e-81	-0.244362	-0.904917
FAM46A	2.71587e-81	-0.431192	-2.82093
GSTM1	2.84546e-81	0.171968	0.815536
NDUFA4L2	3.60795e-81	-0.299149	-1.29352
TTC5	4.63691e-81	0.211162	0.559522
PHC2	5.17572e-81	0.221529	0.502032
TNNC1	5.32223e-81	-0.995302	-4.34312
FAM214B	6.34268e-81	0.0706931	1.12181
SCG3	6.35975e-81	0.0174741	2.01923
X2610028E06RIK	6.54348e-81	0.0158494
LSM6	7.31161e-81	0.144929	0.26826
FGFBP3	7.81966e-81	0.0870568	0.989661
GORASP2	8.48584e-81	-0.200909	-0.506678
ZFP280D	8.66397e-81	0.218765	0.493409
GPSM3	1.04088e-80	-0.253081	-1.96503
BCL7A	1.04841e-80	0.204026	0.563732
PLCE1	1.44985e-80	0.109387	0.966409
CTNNA2	1.78041e-80	0.0647832	1.18893
HALR1	1.87403e-80	-1.05815	-7.12936
WDR18	2.14264e-80	-0.180374	-0.301634
APELA	2.16047e-80	-0.520748	-2.29746
TSPAN17	2.17984e-80	-0.601638	-5.38654
SEC22A	2.19565e-80	0.174343	0.630274
KIF21A	2.49248e-80	0.313317	0.548621
GM26669	2.5249e-80	0.0877471	1.10436
MAT2A	2.96993e-80	0.178211	0.321369
ORMDL2	3.34939e-80	0.235528	0.471373
PRIM1	3.54688e-80	0.211348	0.467952
NR4A3	3.64757e-80	0.0133245	2.29151
CLMP	3.82659e-80	-0.299792	-1.36706
SGK3	4.0859e-80	-0.511078	-3.65287
ALKBH7	5.10805e-80	-0.229701	-0.857586
SOX17	5.13694e-80	-0.975235	-4.66902
LAPTM4B	5.82324e-80	-0.262747	-0.637683
GALNT7	6.28157e-80	0.222237	0.679261
DDR1	6.52741e-80	0.155106	0.78895
GNG12	9.1344e-80	-0.274953	-1.08241
EDN1	1.06763e-79	0.0508393	1.39234
RARA	1.15735e-79	-0.231172	-0.927448
FSTL1	1.4805e-79	-0.263281	-0.608061
RAP2B	1.48106e-79	0.217942	0.635938
STOX2	1.86046e-79	0.276553	0.651271
CD44	1.90726e-79	-0.257628	-2.00236
B2M	2.17814e-79	0.199899	0.651935
PSMC5	2.37028e-79	-0.147853	-0.211053
E130308A19RIK	2.41711e-79	0.192874	0.654866
RPS9	2.45864e-79	-0.099324	-0.143749
GM16286	2.90152e-79	0.169515	0.349994
ANKRD13B	3.86682e-79	0.0960757	0.958132
LRIG3	7.17023e-79	-0.275849	-0.880988
MESDC2	8.75429e-79	-0.180395	-0.339522
MOV10	1.16256e-78	-0.32169	-2.85545
CTSH	1.31339e-78	-0.855501	-4.10825
DDR2	1.89143e-78	-0.79517	-4.83373
BCAT2	2.184e-78	-0.22567	-0.698383
ANXA11	2.18641e-78	-0.238794	-1.75329
ZFP800	2.4948e-78	0.165069	0.784299
BAHCC1	3.57386e-78	0.176704	0.626323
CENPV	3.77584e-78	0.160705	0.830654
RASAL2	3.86358e-78	0.172033	0.68626
GFRA3	4.10244e-78	-0.631558	-5.23765
EIF3K	4.56802e-78	-0.133233	-0.187102
GOLGB1	5.10816e-78	-0.178409	-0.450894
ZC3H14	6.03513e-78	0.191508	0.425588
TM9SF3	7.45833e-78	0.210309	0.422769
SPDL1	7.5444e-78	-0.187819	-0.590189
DOCK7	8.77581e-78	0.226793	0.567544
SYT6	1.19793e-77	0.0268387	1.76728
RBMXL1	1.22134e-77	0.158351	0.304866
SEC62	1.3815e-77	-0.17763	-0.296197
LNPK1	1.4112e-77	0.194621	0.629338
SBK1	1.89504e-77	0.144634	0.775278
MATN2	1.96487e-77	0.0151512	2.16935
ODC1	2.13909e-77	0.181646	0.320035
FKBP8	2.29314e-77	-0.168466	-0.326598
GALK1	2.51661e-77	-0.194767	-0.322454
DPYSL4	2.78599e-77	0.0600463	1.23059
GNG13	3.46622e-77	-0.329555	-2.74694
CLDN3	4.08588e-77	-0.633836	-4.34137
ARHGAP5	4.85917e-77	0.235083	0.462705
LAMTOR1	6.11891e-77	-0.160192	-0.269368
PPP1R9A	6.3025e-77	0.210658	0.689349
KIF18A	6.35966e-77	0.172276	0.634907
AP3M2	7.75232e-77	0.0333114	1.5546
CELA1	7.9581e-77	0.0210609	1.95895
SCOC	8.16546e-77	0.205814	0.4516
CDK18	9.1113e-77	-0.260733	-2.3716
CNN1	9.39269e-77	-0.532302	-3.41321
NDUFA2	9.95949e-77	-0.136403	-0.204845
FOXD2	1.03046e-76	-0.567236	-3.98035
TCF3	1.08434e-76	0.192501	0.395031
MYADM	1.15531e-76	-0.257448	-1.51764
PNPLA3	1.33936e-76	0.0150049	2.45913
FIBIN	1.40705e-76	0.00403508	3.58478
DAPK2	1.47275e-76	0.0369292	1.50944
ADGRG1	1.96725e-76	0.0371695	1.47533
DNPEP	2.26862e-76	-0.221239	-0.574234
KNL1	2.76046e-76	0.230792	0.560812
LSM7	2.86876e-76	-0.197715	-0.372774
PKP2	3.08292e-76	-0.276826	-1.31406
NDUFA5	3.08997e-76	-0.15428	-0.219921
SMIM3	3.16883e-76	0.108603	0.890134
ECHDC1	3.24434e-76	0.162784	0.69647
FAM173A	3.722e-76	-0.207213	-0.569877
RPS6	3.81274e-76	0.0948229	0.141791
MFGE8	4.23913e-76	-0.248324	-0.817146
PMVK	4.65269e-76	0.189244	0.473954
SMARCA1	4.96968e-76	-0.232887	-0.705167
PFDN4	6.01788e-76	0.189635	0.394014
NDRG2	9.23152e-76	-0.320067	-2.83604
TFAP2A	9.40004e-76	-0.404441	-1.89455
LRRC8C	9.43854e-76	0.110831	0.915586
KDM2B	9.57456e-76	0.208156	0.48451
TRMT10C	1.10318e-75	0.224921	0.533525
RANBP1	1.22957e-75	0.117823	0.179563
DUSP4	1.26806e-75	-0.270619	-0.964579
TSPAN4	1.64639e-75	-0.240775	-0.648359
SLBP	1.86936e-75	0.198149	0.370912
CSNK1A1	2.10926e-75	0.143843	0.258593
RIMKLB	2.61593e-75	0.162345	0.733501
TNIK	3.22231e-75	-0.365967	-2.80984
UQCRQ	3.57276e-75	-0.153728	-0.22004
IPO5	3.73145e-75	0.187625	0.355816
ELK3	4.99336e-75	-0.328061	-1.85161
BIN1	5.72414e-75	-0.225609	-0.544361
AFF3	5.75015e-75	0.105776	0.894624
WNT8A	5.98296e-75	-0.502734	-2.79261
MARCH5	6.35985e-75	0.168742	0.358168
NAE1	7.80023e-75	0.179731	0.394839
RBBP7	8.81071e-75	-0.212085	-0.33068
MESP1	1.13513e-74	-1.22119	-5.81243
FAM172A	1.29247e-74	0.138927	0.749186
SMARCAD1	1.36149e-74	0.192306	0.423557
LRRC8B	1.40894e-74	0.0848682	1.04836
POLR2D	1.49801e-74	0.189728	0.372166
H2-D1	1.58897e-74	0.197988	0.72464
KCNJ2	1.87285e-74	0.00365091	3.55611
ZFAND5	2.24434e-74	0.197789	0.401114
CDCA7	2.58301e-74	0.276865	0.454644
SNX5	2.73658e-74	0.157293	0.301857
CDPF1	2.75937e-74	-0.209002	-0.775754
UNC50	3.31554e-74	0.2093	0.481127
GPX7	3.55517e-74	-0.220701	-0.859583
HS6ST2	3.64851e-74	-0.254743	-0.891746
DPF3	3.92283e-74	-0.702081	-5.08307
ATAD1	3.96272e-74	0.201489	0.517929
SPIRE1	4.15435e-74	0.193786	0.635261
GFRA2	4.55171e-74	-0.281121	-2.50628
PSMB6	4.56416e-74	-0.130303	-0.176204
YAE1D1	4.7101e-74	0.202484	0.42066
CERCAM	5.08241e-74	0.0477139	1.31031
UBE2E1	6.36251e-74	0.168751	0.359509
IGFBP4	6.38504e-74	-0.296863	-0.573096
RHPN1	7.52292e-74	0.0526366	1.22953
COX20	7.57474e-74	-0.209274	-0.526653
TCF7L1	8.49849e-74	-0.236167	-0.560283
ATP5G1	8.65134e-74	-0.132676	-0.187319
PDCD5	1.00757e-73	-0.147014	-0.21421
PLXNA4	1.16056e-73	-0.462734	-3.33757
RPS4X	1.35502e-73	0.0935613	0.135206
RDX	1.60217e-73	-0.185655	-0.284388
PIEZO1	1.68257e-73	-0.219075	-1.00355
CYGB	2.04547e-73	0.00814731	2.92649
FGF5	2.13482e-73	-0.778148	-5.99362
HNRNPL	2.20501e-73	0.171757	0.327907
PIP5K1B	2.27585e-73	0.0329548	1.50702
SMARCE1	2.65391e-73	0.158417	0.300693
MEGF9	2.66373e-73	0.0521482	1.24225
PHGDH	2.78375e-73	-0.215164	-0.385308
RPL5	2.87532e-73	0.0991983	0.148469
FAM76B	3.07975e-73	0.207669	0.525923
EED	3.09153e-73	0.188819	0.43077
PLS3	3.28341e-73	-0.208552	-0.456022
MBP	4.47118e-73	0.0911327	1.0172
AP1S2	4.7743e-73	-0.25684	-1.25917
RCN1	9.96314e-73	-0.196653	-0.385743
ZCCHC24	1.05552e-72	-0.234079	-1.69719
SNHG6	1.10829e-72	0.213719	0.481718
HPGDS	1.66841e-72	0.0220458	1.84083
KLHL6	1.75984e-72	-0.931896	-5.52906
B3GNT7	1.94049e-72	-0.283973	-2.19081
SRSF3	2.02581e-72	0.120893	0.190062
PTP4A1	2.03241e-72	0.186035	0.404755
SPATA13	2.25585e-72	0.17518	0.712122
WFDC2	2.25585e-72	-0.233947	-0.65208
RPL23	2.30867e-72	0.0668836	0.0966952
RPL3	2.45035e-72	0.0829507	0.123087
SEMA3F	4.08309e-72	-0.229476	-1.5096
IPO8	4.35005e-72	0.173126	0.554444
PLAGL2	4.63618e-72	0.199666	0.63015
RGS10	4.84589e-72	-0.229529	-1.08852
SPARC	5.53336e-72	-0.270165	-0.49095
SPATS2	5.71248e-72	0.210828	0.454803
ZFP638	5.92513e-72	0.206809	0.422098
ANKRD11	6.40393e-72	0.162964	0.295828
DLL1	8.12086e-72	0.0718444	0.627672
FREM1	1.0085e-71	-0.243548	-1.6149
RFX7	1.0885e-71	0.215825	0.569823
ARMC10	1.22038e-71	0.222837	0.547818
ELOVL1	1.22262e-71	-0.237968	-0.998961
TUBB3	1.32437e-71	-0.254702	-0.870578
FOXP2	1.40858e-71	-0.406932	-2.962
APOBEC2	1.51523e-71	-0.959298	-6.06692
CTBP1	2.04141e-71	0.159906	0.336484
CYR61	2.04331e-71	-0.288087	-1.47365
NSG2	2.24951e-71	0.106918	0.948899
FOXP1	2.25453e-71	-0.225665	-0.469981
KIF26B	2.43775e-71	-0.296013	-2.36328
SMAD1	2.64458e-71	0.197247	0.578729
SERINC2	2.75245e-71	0.093572	0.962668
COL9A2	2.80592e-71	-0.328748	-2.97152
SAMD4	2.97689e-71	-0.24466	-1.64368
RB1	3.40768e-71	0.0750081	1.05182
HSPB2	5.24583e-71	-1.1143	-5.97004
ZMAT3	6.59381e-71	0.167846	0.677567
RHEB	6.5988e-71	0.165338	0.337803
MED21	6.68735e-71	0.185543	0.397276
KRT7	8.36023e-71	-1.01445	-5.84891
ZFP292	9.02613e-71	0.201766	0.418838
ZYX	1.4453e-70	-0.225798	-0.620206
AZIN1	1.74916e-70	0.210646	0.469811
PRR5	1.75012e-70	-0.24784	-1.10507
ROBO3	1.82567e-70	-0.654548	-5.56802
TFAP2B	1.98508e-70	-0.585501	-3.10398
CTSD	2.01755e-70	-0.20684	-0.501741
D8ERTD738E	2.14938e-70	-0.130441	-0.180375
TRIL	2.58109e-70	-0.276069	-1.71377
DARS	2.89182e-70	0.18676	0.406595
HHEX	3.21294e-70	-0.622392	-3.34544
EBF3	3.24554e-70	-0.361935	-2.88255
PCDH18	3.458e-70	0.161618	0.805541
TNS2	3.52309e-70	-0.343441	-3.39561
KLF5	3.6378e-70	-0.434787	-3.55059
RCBTB1	4.2627e-70	0.199047	0.55707
LYRM9	4.40343e-70	0.114835	0.789809
MYO5A	4.55517e-70	0.172262	0.610835
CHEK1	5.46891e-70	0.181252	0.470066
CTSZ	6.69636e-70	-0.204745	-0.410861
CHD1	8.44761e-70	0.177976	0.342338
OGFRL1	1.16088e-69	-0.215338	-0.791872
TOPBP1	1.17772e-69	0.197384	0.411559
IFI30	1.45843e-69	-0.249032	-0.786843
CASC4	1.51448e-69	0.200318	0.599131
STK26	1.67141e-69	-0.241265	-1.53513
MPZL2	1.69647e-69	-0.416733	-3.88928
MCTS1	1.70311e-69	0.193503	0.42626
DEGS1	1.85463e-69	-0.231418	-0.524266
UBB	2.01409e-69	-0.171945	-0.244685
ATRX	2.27731e-69	0.189786	0.348334
TRH	2.28044e-69	-0.614222	-2.87142
HNF1B	2.3342e-69	-1.23797	-8.45612
NAMPT	2.63947e-69	0.204147	0.460601
GNA14	2.76716e-69	-0.268741	-2.25611
FHAD1	2.80087e-69	0.0183863	1.8286
ANKLE1	3.16559e-69	0.072861	0.857398
CALR	3.33587e-69	-0.189533	-0.274344
GAMT	4.89672e-69	-0.222661	-1.06482
FOXA2	5.33177e-69	-0.550712	-2.61498
EPHB3	5.69253e-69	-0.206412	-1.26215
CCDC141	6.11958e-69	-0.6408	-3.56289
FKBP10	6.79059e-69	-0.215315	-0.846996
DDX5	7.54312e-69	0.137271	0.22041
GSK3B	1.09438e-68	0.180987	0.373841
TPCN1	1.13794e-68	-0.239947	-1.20959
PUM2	1.23151e-68	0.196203	0.427727
MCC	1.47968e-68	-0.253879	-1.25146
MRPL57	1.54133e-68	-0.161392	-0.30578
CCDC34	1.68995e-68	-0.158488	-0.24385
CENPA	1.8504e-68	0.203074	0.359744
X2810428I15RIK	2.22527e-68	-0.148756
SLC7A7	2.38044e-68	-0.37309	-2.92065
SENP7	2.64603e-68	0.151713	0.662014
BCLAF1	2.81352e-68	0.162844	0.300731
MFSD14A	2.96124e-68	0.193353	0.561304
PAPD5	3.09263e-68	0.159731	0.633879
TAB2	3.29166e-68	0.207862	0.485349
BSPRY	3.71049e-68	-0.387677	-3.5955
THNSL1	5.21533e-68	0.0728921	1.00921
NAP1L1	5.29879e-68	0.111723	0.169986
ZFP207	5.65491e-68	0.16138	0.309264
WNK3	6.19817e-68	0.186892	0.638118
RAN	6.35372e-68	0.0957336	0.142267
ENC1	6.3986e-68	0.158081	0.795066
BC005561	7.94494e-68	0.191869	0.397494
TRAF3IP2	9.91634e-68	-0.293217	-2.73225
TMEM82	1.16653e-67	-0.239986	-1.92031
VAPA	1.29528e-67	0.137853	0.259117
TBRG1	1.33843e-67	-0.16632	-0.279667
DQX1	1.43022e-67	-0.287892	-1.06886
CUL1	1.52474e-67	0.158562	0.317188
LAMA4	1.6868e-67	-0.4026	-3.24241
NUDT4	1.83338e-67	-0.218329	-0.456885
HIST3H2BA	1.85432e-67	0.151081	0.673375
SURF4	2.24155e-67	-0.186637	-0.371238
EMX2	2.27364e-67	-0.605796	-3.62477
X4933439N14RIK	2.30525e-67	0.00719691
ZFP706	2.39408e-67	0.139259	0.262077
ARHGAP10	2.56446e-67	-0.214676	-0.772533
PDZRN3	2.70978e-67	-0.234872	-1.20611
RAMP2	2.78743e-67	-0.324787	-0.900002
MYOCD	2.92254e-67	-1.04928	-5.36455
GLI3	3.39397e-67	0.244068	0.58214
X1010001N08RIK	3.53254e-67	-0.836338
CHEK2	4.94809e-67	0.175647	0.595968
MARCKS	5.75196e-67	-0.15011	-0.252079
PSAP	6.57629e-67	-0.199392	-0.551209
STAMBPL1	8.18493e-67	-0.247516	-2.19587
TMUB1	8.30605e-67	0.0931964	0.820483
PPIA	8.75356e-67	0.0801234	0.117239
RSL1D1	9.13105e-67	0.15171	0.274792
KAT6A	1.26788e-66	0.190487	0.533716
SH3D19	1.3146e-66	-0.218386	-0.970392
CAPRIN1	1.37563e-66	0.178579	0.325781
API5	1.6885e-66	0.168826	0.363325
SEH1L	2.16983e-66	0.174801	0.387459
RBL1	2.29653e-66	0.108333	0.760224
TFAP4	2.4312e-66	0.159167	0.660286
PATZ1	2.46855e-66	0.194918	0.475371
YPEL3	2.488e-66	-0.222795	-0.822743
EIF3J2	2.51943e-66	-0.169264	-0.294475
PDCL3	2.61555e-66	0.182754	0.410958
EIF2S2	2.97697e-66	-0.115407	-0.163991
X2810417H13RIK	3.47542e-66	0.342747
LIPG	3.71214e-66	0.0117548	2.18502
MIP	3.8743e-66	-0.36561	-3.54095
H2AFJ	4.24517e-66	-0.164615	-0.279521
SQSTM1	4.83607e-66	-0.209208	-0.702357
LY6H	5.25539e-66	0.0539553	1.24036
CCNB1IP1	5.41829e-66	-0.348703	-3.36161
STBD1	5.9867e-66	-0.210045	-1.63793
PLTP	6.88827e-66	0.0616104	1.04946
XKR6	7.37808e-66	0.0977961	0.867034
PELI1	7.63379e-66	0.224087	0.495792
SLC46A1	9.65824e-66	0.0729602	0.979715
AP1S3	9.94993e-66	-0.235932	-1.75074
NID1	1.01111e-65	-0.293124	-2.38225
ARL5B	1.08083e-65	0.170004	0.564691
POC1B	1.28746e-65	0.146613	0.631169
FGD4	1.6289e-65	0.0787857	1.01189
NEDD4	1.9918e-65	0.142627	0.227107
CDH11	2.04058e-65	-0.233435	-0.704474
CDK13	2.66479e-65	0.170852	0.44434
SMARCC2	2.75938e-65	0.158819	0.610118
SLC25A24	3.46078e-65	-0.206214	-0.90389
SRP19	3.71987e-65	-0.136242	-0.188998
LLGL1	3.77636e-65	0.188474	0.574919
CCNT2	3.86283e-65	0.189766	0.449023
CPNE2	3.97464e-65	0.0672758	1.09367
S100G	5.05181e-65	-1.98591	-7.73052
PPP1R14C	5.15404e-65	-0.378717	-2.55046
SRSF6	5.22553e-65	0.140923	0.262306
GID4	6.29651e-65	0.163592	0.503823
DYRK3	6.61981e-65	0.157001	0.674205
ASNS	8.5558e-65	-0.206797	-0.471169
SPIDR	9.03421e-65	0.12497	0.623694
SCARF2	9.47379e-65	-0.336239	-3.12298
SETDB1	1.20616e-64	0.183601	0.464743
HN1	1.3057e-64	0.174258	0.303045
ATP6V1F	1.32213e-64	-0.151306	-0.237278
PARP8	1.56877e-64	0.0465984	1.2163
FNBP4	1.60139e-64	0.205851	0.474381
GMPS	1.9128e-64	0.148579	0.291448
RPL28	1.9226e-64	-0.0774625	-0.11169
PAK1	1.9259e-64	0.246384	0.587942
IFT74	2.07679e-64	0.213501	0.438934
BTF3L4	2.09862e-64	0.152427	0.30747
NDFIP1	2.1129e-64	-0.196114	-0.816875
B3GALT1	2.50127e-64	0.0272505	1.50325
ATP5G3	3.46367e-64	-0.125324	-0.171833
FGD5	4.32814e-64	-0.270744	-1.96729
IFITM2	5.31677e-64	-0.173707	-0.246276
NUTF2	5.55687e-64	0.168471	0.592527
CENPM	6.77007e-64	0.212088	0.465019
MRPL52	7.15208e-64	-0.137209	-0.218099
CTSA	7.55014e-64	-0.209974	-0.563691
SPAG9	8.25812e-64	0.198113	0.470438
CHST7	1.00176e-63	-0.25915	-2.19255
NAP1L4	1.18286e-63	0.152438	0.312529
DLK1	1.345e-63	-0.310774	-1.27027
WFDC21	1.37663e-63		-26.122
AI314180	1.40922e-63	0.196695	0.486759
BATF	1.44342e-63	-0.320466	-3.38038
NDUFB4	1.62919e-63	-0.150189	-0.23834
ITGB1	2.15412e-63	-0.204955	-0.393447
BCL2	2.28617e-63	0.107571	0.895033
TXLNB	2.32514e-63	0.0127075	2.03779
FJX1	2.35757e-63	0.24305	0.587634
TSPAN6	2.35796e-63	0.194168	0.375037
NTN1	2.40414e-63	0.100291	0.89089
EIF4G2	2.60596e-63	0.13256	0.201656
EPHB2	3.806e-63	0.165623	0.70615
UBE2M	4.79036e-63	-0.12509	-0.185244
EHBP1	5.33269e-63	-0.256349	-1.05693
BOLA2	5.49737e-63	-0.147502	-0.213993
LPP	7.1922e-63	-0.225748	-0.99949
ARL6IP6	7.37566e-63	0.199371	0.431351
FAM129B	7.90586e-63	-0.193892	-1.26089
GRHL2	8.54573e-63	-0.294858	-2.48377
IGF2R	8.64871e-63	-0.262708	-0.722994
ADGRG2	9.7554e-63	0.00702086	2.67006
SNX6	1.18589e-62	-0.140203	-0.20955
NRGN	1.33858e-62	-0.255619	-2.19685
GIPC2	1.3522e-62	-0.862373	-5.23336
COX4I2	1.54695e-62	-0.216924	-0.915172
RPL13-PS3	1.54959e-62	0.150703	0.29174
SPAST	1.70319e-62	0.192139	0.466146
ZFP985	1.73807e-62	-0.203067	-1.66709
GATA2	1.80768e-62	-0.561184	-4.43749
ATF3	1.83659e-62	-0.638347	-4.70954
RUFY3	1.86091e-62	0.138584	0.679546
SUV39H2	2.19251e-62	0.185486	0.440386
ZIC3	2.45407e-62	0.192832	0.693207
STAP2	2.54863e-62	-0.182406	-1.20899
TMX4	2.62342e-62	0.132145	0.664056
ZBTB33	2.86307e-62	0.121023	0.680906
EFNA1	2.86611e-62	-0.337306	-2.85436
EGFLAM	3.47918e-62	-0.245881	-2.50338
SLC9A3R2	3.52599e-62	-0.214099	-1.11952
TMEM54	3.98776e-62	-0.401893	-3.24492
SMEK1	4.39168e-62	0.185152	0.427292
CDC7	5.4263e-62	0.161881	0.55126
RBM4B	5.53857e-62	0.187488	0.495559
WNT16	5.67614e-62	-0.568808	-4.84691
GRB14	5.99668e-62	-0.256968	-2.18698
PSMB5	6.60802e-62	-0.11203	-0.145322
ABCA9	7.01011e-62	-0.523296	-4.6505
TRIM59	7.03023e-62	0.195862	0.404662
X2610528J11RIK	8.48786e-62	-1.10535
ATF2	8.62238e-62	0.180249	0.466399
ILF2	8.64791e-62	0.135453	0.266519
RPS6KA1	9.2608e-62	-0.204359	-0.654585
B3GAT1	9.65536e-62	0.0202788	1.71798
CD276	1.4233e-61	-0.192397	-0.687606
IGFBP5	1.52448e-61	0.0605196	-0.0560401
HAGLR	1.58049e-61	-0.483361	-4.12485
SLC25A36	1.66723e-61	0.171935	0.554128
EIF3E	1.6855e-61	0.118735	0.206017
SLC38A4	1.75846e-61	-0.225878	-0.777664
OSR1	2.14068e-61	-0.840332	-5.14321
CMTM8	2.14424e-61	-0.223656	-0.639882
LIFR	2.35768e-61	-0.232386	-1.25347
PPFIA1	2.62991e-61	0.179195	0.446318
T	2.75908e-61	-0.703491	-3.8498
ODF2	2.93643e-61	0.175647	0.42522
PARVA	2.93891e-61	-0.210917	-0.734032
STRBP	3.44832e-61	0.183571	0.373185
NR2F2	3.51758e-61	0.273115	0.772183
CCP110	3.63123e-61	0.164316	0.528455
TLN2	3.70075e-61	-0.227039	-0.537583
RIN2	4.30779e-61	-0.257972	-2.48321
ME1	4.6259e-61	-0.210312	-1.60898
ACVRL1	4.7733e-61	-0.612128	-5.25901
RASSF3	4.85713e-61	-0.200821	-0.8518
SHB	5.54404e-61	-0.203997	-1.30265
BMP5	5.58096e-61	-0.237021	-1.43347
MARK1	5.94931e-61	0.0865476	0.878907
CBR3	6.09873e-61	-0.333812	-2.7561
PLAC1	6.11842e-61	-0.742273	-5.38598
ITIH5	6.51882e-61	-0.213958	-1.30408
LUC7L2	6.78394e-61	0.151586	0.294644
ASPM	7.54119e-61	0.198022	0.557306
DUT	7.79297e-61	0.158466	0.256823
INSL6	8.10892e-61	0.0314253	1.3448
SOX10	8.13678e-61	-0.300098	-2.27754
ATP6V0E	8.9755e-61	-0.159045	-0.285886
NINL	9.20945e-61	-0.18426	-0.715415
MED31	9.78884e-61	0.186873	0.426119
AUTS2	1.02876e-60	0.222998	0.441302
PRKD1	1.05952e-60	-0.196291	-1.19916
NRXN1	1.25427e-60	0.0361825	1.39421
IPO7	1.63078e-60	0.192181	0.408266
EPHA1	1.84367e-60	-0.23848	-1.88455
MCM8	1.96482e-60	0.190365	0.538879
ACACA	1.97847e-60	0.170546	0.515987
TNK1	2.00409e-60	-0.38264	-4.09866
CPOX	2.15201e-60	-0.211196	-0.58385
VASP	2.86289e-60	-0.205668	-0.500782
RBM47	2.94329e-60	-0.703856	-4.97287
AHCYL1	3.07976e-60	0.175228	0.424317
RLF	3.94556e-60	0.17512	0.460373
SMAGP	3.97042e-60	-0.311491	-2.52803
TMC6	4.08074e-60	-0.197141	-1.3437
TWIST2	4.19717e-60	-0.4143	-3.61051
HSPA4	4.33903e-60	0.1498	0.266032
CD59A	4.4378e-60	-0.280307	-1.02501
PYGO1	4.44438e-60	0.0621251	1.06162
PHOX2A	5.03886e-60	0.0561905	0.980868
SOD2	5.18454e-60	0.179489	0.38903
GJA1	5.3453e-60	0.29454	0.482995
CEP55	5.53417e-60	0.117763	0.677352
SLC30A9	5.7669e-60	0.170576	0.426689
CDK17	5.90043e-60	0.111836	0.741786
FEZF2	6.03437e-60	-0.568799	-3.97256
BICD1	6.48465e-60	0.14646	0.724199
TMEM2	7.05844e-60	0.137611	0.508046
CCDC88A	8.17378e-60	-0.20609	-0.474804
HIST1H2BK	8.57526e-60	0.0476081	1.0796
NLK	9.15133e-60	0.1673	0.509725
CDH7	9.27347e-60	0.0118041	2.18018
KLC3	1.00997e-59	-0.204978	-1.64821
SH3BP4	1.03068e-59	0.100105	0.777114
SPIN2C	1.06954e-59	-0.257859	-0.985434
RIPK4	1.10663e-59	-0.222008	-2.1744
PTGFR	1.14629e-59	-0.536629	-4.43092
RAB10	1.15951e-59	0.160361	0.341165
ORMDL1	1.15968e-59	0.180062	0.507346
ARVCF	1.39894e-59	0.13687	0.696208
LPAR3	1.4119e-59	-0.264228	-2.43765
VAMP3	1.54209e-59	0.183987	0.410233
TRP53	1.87542e-59	0.163216	0.334068
LSM5	1.97428e-59	0.127771	0.239085
SPRED3	1.97939e-59	0.0728105	0.944117
ZFP131	2.14288e-59	0.199008	0.461341
CRLF1	2.1854e-59	-0.312901	-3.27328
ATAD2B	2.25101e-59	0.180205	0.485525
ST6GAL2	2.39449e-59	0.0328189	1.39702
GRB7	2.4317e-59	-0.224616	-1.1886
PEBP1	2.60926e-59	0.101025	0.163194
HDLBP	2.62218e-59	-0.148933	-0.230266
STX6	2.62798e-59	0.185975	0.492104
USP28	2.75942e-59	0.13727	0.637428
FHL3	2.88915e-59	-0.18813	-1.36257
FUNDC1	3.18952e-59	-0.184289	-0.662134
TPRGL	3.34098e-59	-0.163116	-0.370698
PLP2	3.52919e-59	-0.19931	-0.477902
LHX2	3.7907e-59	-0.355587	-1.54978
SERINC5	3.92165e-59	-0.198024	-1.80877
COBLL1	4.67795e-59	-0.311958	-2.17738
NEDD1	5.09729e-59	0.145158	0.54393
RABGGTB	5.58169e-59	0.170539	0.389418
MRPS36	5.8049e-59	-0.134598	-0.189347
SNHG11	5.97426e-59	0.205795	0.644546
INIP	6.17976e-59	0.18967	0.498335
USP9X	6.34174e-59	0.186647	0.42713
CLASP1	6.34174e-59	0.185029	0.478409
NXF7	6.42289e-59	-1.14029	-8.09374
WIF1	6.78085e-59	0.0182521	1.91215
STUB1	6.80778e-59	-0.126745	-0.169115
ARHGAP23	6.82076e-59	-0.198024	-2.00032
ANK2	6.97049e-59	0.208472	0.622609
CD164L2	7.33607e-59	-0.452015	-4.77638
DHRS3	8.02583e-59	-0.287192	-2.7124
RNF122	8.14579e-59	0.112837	0.775585
NANOG	9.10885e-59	-0.357104	-3.60646
RCC2	9.71059e-59	0.155726	0.291749
LUM	1.00179e-58	-0.811182	-4.03073
CSTB	1.00191e-58	-0.175466	-0.33197
RPS27	1.00231e-58	-0.110734	-0.160956
KLHDC2	1.13941e-58	0.146938	0.304407
X2900011O08RIK	1.14366e-58	-0.244975
HAUS7	1.17335e-58	-0.192884	-0.507432
HMGCS1	1.24173e-58	0.164676	0.458295
CCNI	1.30689e-58	0.168445	0.359775
X2900026A02RIK	1.35846e-58	0.0890433
MRE11A	1.59431e-58	0.17347	0.461274
MS4A4D	1.63983e-58	-0.208204	-2.05879
PGF	2.02406e-58	-0.314199	-2.38036
SLC5A3	2.03832e-58	0.133758	0.688136
VPS36	2.1073e-58	-0.148653	-0.246268
PRTG	2.32982e-58	0.218683	0.373757
GNGT2	2.50932e-58	-0.238664	-1.50486
APOB	2.57554e-58	-1.4615	-5.70884
RNF5	2.70897e-58	0.19523	0.46908
CTNNA1	2.75673e-58	-0.167567	-0.314762
NARF	2.85018e-58	0.127296	0.61814
HSD17B11	3.21894e-58	-0.229881	-1.75978
RBM15B	3.63154e-58	0.178065	0.471228
MPDZ	3.83879e-58	0.169156	0.498482
SNHG12	4.01575e-58	0.201783	0.501613
EEF1A1	4.23206e-58	0.108493	0.160639
GPRC5B	4.37576e-58	0.0662204	0.970301
FBXL14	5.04739e-58	0.18757	0.527495
RAD1	5.19834e-58	0.155607	0.522574
ZFP113	5.52179e-58	0.134729	0.639312
ZNRF3	5.99922e-58	0.0819891	0.810372
PDLIM4	6.5045e-58	-0.161526	-0.545651
CCDC8	7.43014e-58	-0.18643	-0.88998
THSD7A	7.46838e-58	-0.235984	-2.19731
WDR1	7.95377e-58	-0.209379	-0.55603
X6720427I07RIK	8.55452e-58	0.108952
ISG20L2	8.87072e-58	0.18273	0.503698
ADAMTS3	9.63144e-58	0.019854	1.75083
MXI1	9.90552e-58	0.140703	0.685137
UBE2N	1.01289e-57	0.127505	0.245429
OIP5	1.12853e-57	0.135838	0.559739
KHDRBS1	1.2468e-57	0.143647	0.273007
SGK1	1.30195e-57	-0.244574	-1.63429
CISD2	1.40251e-57	0.151898	0.3257
DUSP27	1.54647e-57	-0.557585	-4.80686
NELL2	1.77226e-57	0.0441548	1.15834
HSF2	1.84057e-57	0.178674	0.554138
MOB3B	2.19005e-57	0.0900299	0.815466
CERS5	2.21409e-57	-0.185686	-0.548012
PPP1R11	2.34366e-57	-0.146361	-0.248056
MEIS1	2.69581e-57	-0.0954132	-0.425682
PPP1R13B	2.8025e-57	-0.257646	-2.32964
GMPR	2.88832e-57	-0.21072	-1.7777
RPS28	2.94448e-57	-0.104426	-0.1521
E130012A19RIK	2.96796e-57	0.247134	0.474404
SNRPE	3.16339e-57	0.0849263	0.133283
SEC11C	3.226e-57	-0.199353	-0.66625
MIRG	3.68426e-57	-0.224783	-0.921775
PI4K2B	4.30501e-57	-0.18578	-0.601269
GPHN	4.31551e-57	0.111874	0.659612
FIS1	4.76948e-57	-0.130228	-0.20434
SMYD2	4.8998e-57	-0.192564	-0.533008
CLIC6	5.28964e-57	-0.4248	-2.81349
WDR66	5.51303e-57	-0.410752	-4.23402
JAKMIP1	5.63845e-57	-0.341513	-3.59468
MRPS18B	6.23518e-57	-0.159987	-0.322129
PDE3B	6.27783e-57	0.145894	0.619525
RAD18	6.27931e-57	0.162294	0.522444
LARS2	6.40768e-57	-0.213455	-0.729801
WNT5A	7.73295e-57	-0.240519	-1.01273
JAKMIP2	8.16497e-57	0.0979088	0.787861
SETBP1	8.84677e-57	0.127435	0.646767
FAM220A	8.93093e-57	0.180653	0.437934
RC3H2	8.99556e-57	0.177518	0.48555
MARCH9	9.58098e-57	0.152919	0.60346
SNX18	1.10013e-56	0.155725	0.529835
DSC2	1.17269e-56	-0.307298	-3.18653
RFLNA	1.17425e-56	-0.353982	-3.13489
LSM1	1.18049e-56	0.160477	0.349832
PSMC3	1.21228e-56	-0.121573	-0.204941
TGFBR3	1.2194e-56	-0.222512	-1.50732
SYNE4	1.22474e-56	-0.168282	-1.35495
LRP2	1.32482e-56	0.179031	0.666895
SH3BGRL3	1.35889e-56	-0.153789	-0.241556
MSANTD3	1.42446e-56	0.186707	0.448087
CPN1	1.57062e-56	-0.488673	-3.55603
ENPP2	1.77964e-56	-0.25379	-2.10565
ABHD17C	1.81882e-56	0.181825	0.504602
TSC22D3	1.97273e-56	0.156886	0.566098
GAS2L3	2.28249e-56	0.101065	0.742469
RPS7	2.521e-56	0.0709264	0.104701
ZFP760	2.53686e-56	0.138547	0.658208
RTTN	2.62171e-56	0.0581925	0.905579
WIZ	2.65226e-56	0.134615	0.489959
ITPR1	2.78056e-56	-0.218296	-0.926612
RIC3	2.84367e-56	0.108945	0.757166
VCP	3.10277e-56	-0.114998	-0.170618
SGMS1	3.1058e-56	-0.200447	-1.03744
UPP1	3.21048e-56	-0.279007	-1.02641
STRA6	3.22413e-56	-0.224217	-1.19506
NDUFV1	3.73291e-56	-0.156684	-0.299657
XPOT	3.8149e-56	0.195541	0.482317
CD55	4.10315e-56	-0.513566	-4.28103
SOS2	4.5694e-56	0.0901282	0.798348
FRMD6	6.12399e-56	-0.219428	-0.909577
SRSF2	6.43488e-56	0.110407	0.183884
FCHSD2	6.75618e-56	0.139198	0.632737
DUSP5	6.93382e-56	0.116247	0.771852
NUCB1	7.0057e-56	-0.189641	-0.518014
MIER1	8.20008e-56	0.175628	0.377648
SMOC2	8.26856e-56	-0.516068	-4.09624
EMC8	8.42838e-56	-0.131709	-0.185423
SLC29A1	9.31374e-56	0.12341	0.701138
PAFAH1B2	1.13587e-55	0.161101	0.356128
PABPC4	1.18119e-55	0.184249	0.419656
CASZ1	1.18731e-55	0.0616405	1.21613
EHMT1	1.20667e-55	0.163403	0.345212
ENG	1.23938e-55	-0.543971	-3.95068
HERC1	1.26304e-55	0.164456	0.469499
TDP2	1.4197e-55	0.174904	0.443074
MIS18A	1.59133e-55	0.175373	0.439351
PDE10A	1.84082e-55	0.0376433	1.26816
KMT2E	1.87375e-55	0.187111	0.468924
TBX5	2.07657e-55		-25.6593
GPR27	2.09399e-55	0.0927554	0.785693
DZIP1	2.10051e-55	0.0922465	0.787261
ABHD17B	2.12331e-55	0.164927	0.454252
FAM60A	2.13736e-55	0.170217	0.302104
AVPI1	2.26413e-55	-0.187934	-0.596752
ODF2L	2.41177e-55	0.13878	0.579028
HMMR	2.67421e-55	-0.18675	-0.464281
A730017C20RIK	2.74191e-55	0.050626	1.09265
MDK	2.95993e-55	-0.136361	-0.194975
GTF2H3	3.38019e-55	0.183187	0.448363
GNB5	3.48886e-55	0.111251	0.711393
SRF	3.73894e-55	-0.194799	-0.682683
ATP5J	4.18647e-55	-0.0935358	-0.132832
CADM1	4.53406e-55	0.292569	0.479653
RBBP4	4.76896e-55	0.128468	0.242636
APOA1BP	4.79645e-55	-0.177506	-0.435024
CIART	5.14971e-55	0.0819961	0.82556
SEMA3A	5.21592e-55	0.0659675	0.949847
INSIG1	6.91566e-55	0.0764412	0.808906
PFKP	7.0273e-55	-0.187522	-0.976831
GM3550	7.74206e-55	0.167954	0.518216
AFF1	7.88228e-55	0.0931276	0.747775
ARHGEF15	7.91464e-55	-0.263036	-2.32705
FAH	8.25039e-55	-0.172755	-1.55751
FAM117B	8.78854e-55	0.131343	0.613511
ZMYM2	1.0252e-54	0.184835	0.469884
MGMT	1.03972e-54	-0.171093	-0.766777
GM27204	1.12347e-54	-0.296182	-3.28864
ALMS1	1.42382e-54	0.15151	0.587274
LRFN4	1.48613e-54	-0.180993	-0.727682
UHRF2	1.5649e-54	0.165772	0.355144
HSD17B12	1.63249e-54	0.164686	0.368649
FBXW7	1.69168e-54	0.180416	0.474032
GABARAPL2	1.76186e-54	0.15493	0.337375
SPON1	1.80864e-54	0.14388	0.746371
GM20604	1.90707e-54	0.134806	0.567284
PCYOX1L	1.92676e-54	0.133825	0.634978
ZFP580	2.30581e-54	0.127678	0.661444
CHORDC1	2.35413e-54	-0.148567	-0.255129
CYP51	2.39778e-54	0.169722	0.569919
PGM2L1	2.47584e-54	0.0878191	0.806225
FAM174B	3.14603e-54	-0.205387	-1.65466
SIGMAR1	3.49009e-54	0.189231	0.395531
EXO1	3.66241e-54	0.184822	0.441297
NDUFA3	3.67303e-54	-0.143543	-0.314605
LRRC58	4.04829e-54	-0.150919	-0.244909
GAREM2	4.6044e-54	0.0281381	1.34784
CUX1	5.16699e-54	0.171479	0.467919
PYGL	5.63398e-54	-0.199382	-1.47359
CHUK	5.71135e-54	0.130187	0.5261
CNOT7	6.21682e-54	0.181616	0.400899
AFAP1	6.799e-54	-0.181804	-1.06116
LIMCH1	7.1919e-54	-0.248986	-1.47301
AURKAIP1	7.86877e-54	-0.137659	-0.228319
SRSF4	8.03785e-54	0.166062	0.380484
YWHAQ	8.37117e-54	0.107394	0.178649
ASXL3	8.37484e-54	-0.177542	-1.54281
[truncated: 11,011 more rows]

## Sheet: PhenoGraph cluster 4
gene	P-value (FDR adjusted)	MAST Hurdle	logFC
MARCKS	0	1.65633	1.91553
CALD1	0	1.45227	1.93002
PEG3	0	1.30421	1.52652
TPM1	0	1.26881	1.64596
LMO4	0	1.18636	1.83646
H19	0	1.10985	1.61987
VCAN	0	0.998539	3.05367
NNAT	0	0.990119	1.55961
CD63	0	0.977071	1.68013
SERPINH1	0	0.972477	1.41821
BASP1	0	0.972207	0.945926
COL4A1	0	0.96557	2.04273
IGFBP4	0	0.953408	1.7483
FST	0	0.935436	2.95724
PRRX2	0	0.872789	2.77487
TWIST1	0	0.845192	3.8019
RBMS1	0	0.844728	1.20756
FZD2	0	0.840063	1.18683
H2AFY2	0	0.769942	1.17342
FSTL1	0	0.754768	1.74066
P4HA1	0	0.741026	1.39804
NR2F2	0	0.740046	3.06958
FOXP1	0	0.734288	1.41104
CADM1	0	0.7193	1.29168
FBN2	0	0.707024	2.36446
PLOD2	0	0.703591	1.75
SLC25A4	0	0.697017	1.07035
CNN2	0	0.686215	2.81612
MT-ND6	0	0.670548	1.19976
EGLN1	0	0.64974	1.05718
MFAP2	0	0.646055	1.7495
IGF2	0	0.639278	1.96292
AUTS2	0	0.63644	1.03776
FXYD6	0	0.61187	1.22804
BNIP3	0	0.609958	0.998591
COLEC12	0	0.607355	3.03544
ASPH	0	0.593133	1.28132
SOX9	0	0.572049	2.29235
APP	0	0.561303	1.38576
COL2A1	0	0.557839	2.27838
PRELID2	0	0.555854	1.1544
TCF12	0	0.553106	0.931386
TPM2	0	0.546046	1.30657
LPAR1	0	0.542675	2.14273
TPM4	0	0.538104	0.867944
CDH11	0	0.53026	3.61338
DAB2	0	0.519245	1.83288
CCDC88A	0	0.518372	0.971317
PTGIS	0	0.518108	1.27781
PGRMC1	0	0.513061	0.896726
FAM162A	0	0.502094	0.775198
KDELR2	0	0.498384	0.853329
PDLIM4	0	0.497441	2.50479
MYO1B	0	0.496029	1.13647
EVA1B	0	0.495907	1.88573
GPX3	0	0.492872	1.71912
WTIP	0	0.473009	0.869673
GALK1	0	0.470494	0.798574
FKBP9	0	0.468742	1.22893
RBFOX2	0	0.466637	0.913524
COL4A2	0	0.461199	2.113
LRP1	0	0.431322	1.20217
LAPTM4A	0	0.422484	0.723372
CTHRC1	0	0.421062	2.13679
HIGD1A	0	0.420542	0.66808
CAPZB	0	0.413438	0.728607
PDGFRA	0	0.41025	1.41368
PLPP3	0	0.407876	1.50404
CNN3	0	0.40603	0.678239
EID1	0	0.402373	0.675772
IDH2	0	0.401764	0.715762
IRF2BP2	0	0.392693	1.42595
S100A6	0	0.382568	2.3187
HAPLN1	0	0.372516	2.24081
GNAS	0	0.370101	0.557347
ACTG1	0	0.366026	0.533626
EBF1	0	0.362932	4.06177
CTDSPL	0	0.359226	1.351
PTH1R	0	0.35858	1.49299
ZEB1	0	0.355976	1.41298
DLC1	0	0.350852	1.68704
STXBP6	0	0.345951	1.46912
HS6ST2	0	0.336242	1.7351
AHDC1	0	0.33531	1.29804
ALDOA	0	0.330024	0.484878
ITGB5	0	0.327393	1.36323
BSG	0	0.325258	0.488904
TPI1	0	0.324935	0.487656
RPS6KA3	0	0.314558	1.54482
P4HA2	0	0.314459	1.9443
ARHGAP28	0	0.314065	1.5754
FAM212A	0	0.309928	1.91833
FOXC1	0	0.305579	2.56705
LIMA1	0	0.304946	1.87021
COL23A1	0	0.290378	3.06704
FOXC2	0	0.286507	2.67607
NFIL3	0	0.281764	2.47673
ANXA2	0	0.277075	1.7451
PRRX1	0	0.276842	2.8304
GLIPR2	0	0.276806	2.0464
MYL9	0	0.272847	2.07386
HMCN1	0	0.260656	1.81823
SMOC1	0	0.258542	2.03752
NDUFA4L2	0	0.25801	3.00583
TFPI	0	0.25528	2.05651
SDC2	0	0.250452	1.5176
GNG11	0	0.247834	2.19155
SAT1	0	0.246703	1.67782
HAS2	0	0.236487	1.95687
RSPO1	0	0.232575	2.48743
MFAP4	0	0.228105	2.82937
FAM110B	0	0.225087	1.87129
FOXD1	0	0.223008	4.83217
PIK3R1	0	0.222177	2.01128
NEFL	0	0.218457	2.48169
CLMP	0	0.216045	3.36685
PREX2	0	0.2158	1.58385
COL5A2	0	0.207027	2.90602
P3H2	0	0.204764	1.744
SNAI1	0	0.203487	2.41442
TBX1	0	0.201931	2.98069
SIX1	0	0.198571	4.03741
ETS1	0	0.197416	1.28707
TMEM132C	0	0.191887	2.99121
COL26A1	0	0.190745	4.18888
ST6GALNAC3	0	0.190353	2.15772
COL5A1	0	0.186449	1.65751
AHNAK	0	0.18582	2.12822
ITGA9	0	0.178784	2.75206
EYA1	0	0.178707	2.55414
SLC9A3R2	0	0.176663	1.75609
ROBO2	0	0.175247	2.07576
CXCL12	0	0.174002	2.14644
SPARCL1	0	0.170795	3.64388
MRC2	0	0.170021	1.53851
GM266	0	0.163691	2.01719
PDGFRB	0	0.162745	3.81223
SOBP	0	0.15344	2.28165
ITIH5	0	0.151161	2.35513
CTTNBP2	0	0.145117	2.26937
RAB3IL1	0	0.144319	2.98021
SEMA5A	0	0.144044	2.09357
COL13A1	0	0.137731	2.01834
TMEM51	0	0.137305	2.25244
PITX2	0	0.136105	2.59829
SNAI2	0	0.136013	3.38195
FLRT2	0	0.135122	3.00439
PCOLCE	0	0.134874	2.29473
NPR3	0	0.133534	2.71395
NBL1	0	0.133223	2.45506
EDNRA	0	0.132655	2.93888
FBN1	0	0.132602	1.96765
VEGFC	0	0.131863	3.6837
EEF2K	0	0.129396	2.74868
TRIL	0	0.125393	2.82604
NEFM	0	0.122495	2.57486
COL9A1	0	0.116009	3.39376
DACT3	0	0.110816	2.5093
CRISPLD1	0	0.106491	2.71355
CTGF	0	0.10507	2.6368
IRS1	0	0.100701	2.40867
DOCK5	0	0.0965325	2.08496
ITGA8	0	0.0945055	2.94524
DCHS1	0	0.0942978	2.02842
PLEKHG1	0	0.0925754	2.4193
FAM174B	0	0.0879899	2.24692
SERPINF1	0	0.0851144	2.94632
SVEP1	0	0.082028	3.03743
TMEM45A	0	0.0804151	2.51498
CD248	0	0.0781344	2.76782
SIX2	0	0.0776419	4.16026
EBF2	0	0.07597	4.30005
HLF	0	0.0753603	3.78892
BGN	0	0.0707142	3.82538
TMEM119	0	0.0683679	2.39213
TNS1	0	0.0646661	3.32931
TGFBI	0	0.061709	3.49035
PAX9	0	0.0562714	3.03825
EBF3	0	0.0560586	3.68362
CPED1	0	0.0551101	4.48689
FOXP2	0	0.053607	4.31282
CBR3	0	0.0519873	2.71451
GM12829	0	0.0486995	3.72491
RFTN2	0	0.0431019	2.75064
FAT4	0	0.0423821	3.4715
CRYM	0	0.0415425	2.97889
SCARF2	0	0.0415237	3.02539
FOXD2	0	0.0408554	4.28544
LUM	0	0.0361309	6.02248
DNM1	0	0.0356873	2.96722
TWIST2	0	0.0336299	4.13802
TNFAIP6	0	0.0314837	3.50864
DDR2	0	0.0309116	5.23749
IGF1	0	0.0304273	3.20952
S1PR3	0	0.0296684	4.64193
ABCA9	0	0.0239986	4.37822
COL3A1	0	0.0226802	6.14364
SGCD	0	0.0219089	3.27672
CAV1	0	0.0178607	4.37977
TBX18	0	0.0145023	4.1287
ISLR	0	0.0131908	4.55946
ALX4	0	0.0118932	4.71287
DUPD1	0	0.00977381	4.57489
MAB21L1	0	0.00567754	5.03603
CALM2	0	-0.359312	-0.554965
NOL7	0	-0.366751	-0.640792
GNAI2	0	-0.375283	-0.591407
ATP6V1F	0	-0.383946	-0.691107
DDT	0	-0.432912	-0.782384
LARP7	0	-0.472542	-0.907011
DPYSL5	0	-0.540899	-2.36749
COL18A1	0	-0.54297	-1.5887
TCFL5	0	-0.552422	-2.01326
FHL1	0	-0.600831	-2.00816
DDAH1	0	-0.615977	-2.26443
PLS3	0	-0.630971	-1.82887
ITGA6	0	-0.639923	-2.57017
CD9	0	-0.640746	-2.46266
CNTFR	0	-0.641291	-2.29976
HOOK1	0	-0.660913	-2.86439
CRMP1	0	-0.661689	-2.9556
TUBB2B	0	-0.678701	-2.08265
TLE4	0	-0.68683	-2.27707
HIST3H2BA	0	-0.689265	-3.3531
DNMT3B	0	-0.696106	-1.61042
AES	0	-0.699701	-1.95128
ARL4C	0	-0.750724	-2.77681
MEG3	0	-0.758439	-1.71307
EPHB1	0	-0.760878	-3.86534
BST2	0	-0.766272	-4.05095
UCHL1	0	-0.770332	-2.55997
TUBB3	0	-0.777385	-3.0672
KIF21A	0	-0.781327	-2.64679
LDHB	0	-0.787806	-1.70626
PODXL	0	-0.789089	-2.79928
CRIP2	0	-0.799669	-2.46551
SLC2A1	0	-0.813524	-1.40605
F11R	0	-0.83556	-3.98196
INA	0	-0.848595	-3.48461
LRP2	0	-0.849519	-3.59369
RASGRP2	0	-0.86791	-3.11811
CMTM8	0	-0.887968	-4.003
BEX4	0	-0.89211	-1.67367
SPINT2	0	-0.898307	-3.33038
EZR	0	-0.93673	-2.66406
EMB	0	-0.961009	-2.05235
WFDC2	0	-1.00591	-3.7882
ACER2	0	-1.01052	-3.15182
SLC2A3	0	-1.01678	-2.28864
CRABP2	0	-1.08809	-2.34361
STMN2	0	-1.14686	-3.71528
SOX1	0	-1.15817	-4.42995
CHCHD10	0	-1.15997	-4.53132
SOX3	0	-1.18458	-3.97229
ERAS	0	-1.24678	-5.51424
PCSK1N	0	-1.2542	-4.32432
POU3F1	0	-1.28548	-4.15558
POU5F1	0	-1.44351	-4.35314
BEX1	0	-1.44606	-2.74358
PHLDA2	0	-1.48197	-3.13197
SOX2	0	-1.7478	-4.61284
EPCAM	0	-1.76177	-5.02499
PGAM1	3.90023e-307	0.251048	0.36822
PPFIBP2	5.12652e-307	0.0585355	2.4617
DCLK1	6.76954e-307	0.0950532	1.99719
SP8	1.08381e-301	-0.903465	-3.83541
PAK1	2.68133e-301	-0.512936	-1.70091
GM2694	5.51154e-301	-0.812296	-2.84711
NID2	6.48099e-301	0.289531	1.46776
TMSB10	8.9197e-300	0.429679	0.57946
MPC1	1.01554e-299	0.203043	1.34062
ARID3A	1.14425e-299	0.546488	1.08035
SLC38A4	2.53622e-299	0.332269	1.36341
ZIC3	1.85849e-298	-0.809195	-2.88611
HMGN5	1.53668e-297	-0.434945	-1.01529
PIM1	6.32118e-297	0.392665	1.46641
GPC3	1.01776e-296	1.02045	1.20753
CELSR2	3.90464e-296	-0.644528	-3.15517
AKAP7	2.37223e-295	0.19471	1.27241
RCN3	7.18731e-295	0.457822	1.03125
FAIM	2.70742e-294	0.384726	0.8953
PGM2	3.62359e-294	0.395774	1.06209
PPIB	9.28408e-294	0.306239	0.475276
CBLB	3.75525e-293	0.27645	1.18922
TSPAN12	8.562e-293	0.298147	1.3757
MKRN1	1.25533e-292	-0.472823	-1.15587
GMDS	5.15554e-292	0.250642	1.24498
STMN3	1.1474e-291	-0.716814	-4.59372
ANK3	3.21048e-291	0.36221	1.30834
S100A10	1.07732e-290	0.642981	1.4172
LOXL2	1.09174e-289	0.540945	1.13317
NPDC1	1.97269e-288	-0.563042	-2.95218
GNG3	9.11872e-288	-0.593397	-2.61001
PAPPA	1.31028e-287	0.12437	1.98919
GNAI1	1.9707e-285	0.248828	1.30758
COL1A1	1.57271e-284	0.0584376	2.56037
LSR	2.61549e-284	-0.397898	-1.2359
EIF2AK4	1.09564e-283	0.303662	1.11222
MEIS2	1.09659e-283	-0.585713	-1.44048
COPZ2	4.4169e-282	0.196385	1.56083
SALL4	1.7364e-281	-0.471446	-1.14245
SOX21	6.06694e-281	-1.14602	-3.60107
IAPP	1.25356e-279	0.0103944	4.69947
KLK8	3.91133e-279	-0.423699	-1.36868
SPATA13	5.29289e-279	-0.492903	-2.13693
YAF2	2.25014e-278	0.4548	0.817232
TNS3	3.2485e-278	0.207497	1.45628
RBM3	3.96742e-278	0.283822	0.44335
TMEFF1	3.11559e-275	0.432637	0.810686
SDC3	3.68403e-275	0.122649	1.85868
B230312C02RIK	1.28828e-271	-0.6429	-1.79899
COX7C	1.4172e-271	-0.233293	-0.346238
HHIP	3.01195e-271	0.0436075	2.63291
NRXN2	4.74043e-270	-0.601141	-2.56661
TMED2	1.06887e-269	0.342896	0.58926
SAMD4	6.94938e-268	0.110642	1.8736
SERTAD4	1.04104e-267	0.0411039	2.53781
CDKL1	2.54046e-267	0.0449213	2.42214
DIXDC1	5.25393e-266	0.103172	1.83712
SELENOP	6.02739e-266	0.212365	1.47604
NRP2	2.85099e-265	0.50984	1.45923
UBL3	2.57106e-264	0.387507	1.09966
NKX3-1	3.46546e-264	0.0302327	3.13301
CREB3L2	1.43833e-263	0.165363	1.58959
PIM2	2.94773e-263	-1.05678	-3.74119
FLI1	4.78003e-261	0.080071	1.32205
NRSN1	5.40977e-260	0.0171966	3.42386
KDELR3	6.09227e-260	0.098991	1.9626
VEGFB	5.96705e-259	0.420638	0.742472
IGF1R	1.39892e-258	0.447956	0.88513
MT-ATP6	8.90433e-258	-0.324154	-0.466381
DUSP7	1.40406e-256	0.284592	1.16449
DCN	4.0481e-256	0.0372234	3.11002
VSNL1	1.44182e-255	0.0366105	2.62764
MAGED2	6.74351e-255	0.413995	1.03896
TPD52	1.54073e-254	-0.546111	-2.27837
DACT1	3.19393e-254	0.169553	1.68569
PTK7	3.4223e-254	0.284356	1.1194
UNCX	4.22209e-254	0.021388	3.35628
NREP	1.45378e-253	0.459751	1.13015
TMEM167	2.28237e-253	0.273103	0.457276
MT-ND1	3.60665e-253	-0.388978	-0.559645
SH3BP5	1.35388e-252	0.18145	1.65508
CDH1	4.8792e-252	-1.14812	-4.83305
PNP	1.09853e-250	-0.385187	-0.927864
KRT18	1.80628e-250	-1.08766	-2.29334
MARCH9	1.9585e-250	-0.521426	-2.21484
GM26523	6.45425e-250	0.0202898	3.01305
LDHA	1.91076e-249	0.246313	0.357739
CYP26C1	1.08536e-248	0.0218644	3.02829
FAM57B	1.73452e-248	-0.762839	-4.31845
SIX4	2.9878e-248	0.247078	1.23134
VEGFD	3.62384e-248	0.0185474	3.1409
HOXB1	1.9965e-247	-1.58484	-5.7505
ERO1L	3.19218e-247	0.356055	1.06916
SALL3	5.61634e-247	-0.540305	-2.15775
LIN28A	7.17103e-247	-0.362708	-0.688683
FBLN1	5.92065e-246	0.482066	0.883997
FOXF2	1.33406e-245	0.0117809	3.75182
BTBD17	1.8436e-245	-0.801208	-3.8112
UGP2	8.34041e-245	0.302402	1.09315
PPFIBP1	5.63146e-244	0.458653	1.03533
LAMA1	5.75019e-244	0.215334	1.43143
MAP7D2	8.87275e-243	-0.573643	-2.67908
SPINK1	2.98103e-242	-1.36746	-4.31394
KMT2E	7.00401e-242	0.424646	0.92153
OSTC	1.60155e-241	0.280343	0.472713
MT-ND4	7.3891e-241	-0.326508	-0.465636
LAMC3	3.04759e-240	0.00128557	6.06124
NDNF	4.40858e-240	0.095605	2.1081
RALGPS2	1.17671e-239	-0.383389	-1.09905
NAB2	1.24443e-239	0.0778374	1.90118
FTH1	3.52901e-239	0.293134	0.436125
UCP2	3.90119e-238	-0.468231	-1.86876
SPG20	3.654e-237	0.323515	0.952808
HMGN3	1.0119e-235	0.464909	0.918141
HEBP1	3.3466e-235	0.255256	1.35195
LIX1L	3.51258e-235	0.185609	1.36084
MT-ND4L	1.04038e-234	-0.326185	-0.496225
GLDC	1.33109e-234	-0.620595	-2.35938
HES3	1.93801e-234	-1.42857	-4.57559
ARHGEF40	3.39044e-234	0.211126	1.2617
GPX8	3.76526e-234	0.341062	1.14724
SLC27A3	8.47244e-233	0.259284	1.15256
BATF	8.55874e-233	0.0385513	2.44735
EMILIN1	4.47931e-232	0.222123	1.2749
PLEKHA7	5.87567e-232	-0.530912	-2.45977
PAX2	2.73815e-231	-1.03325	-4.34771
ADK	1.28157e-230	0.348586	0.644575
H2-K1	1.5841e-230	-0.516363	-1.58638
FZD1	1.27844e-229	0.0945056	1.77867
RAB11FIP4	2.81096e-228	-0.508187	-2.42029
DUSP6	3.50064e-227	0.218104	1.46775
MAP1B	3.68467e-227	-0.590386	-1.14861
TAGLN	4.49203e-227	0.186911	1.82231
APBA2	1.24177e-226	-0.65604	-3.56374
SCG5	2.24392e-226	-0.726972	-4.19282
CASK	2.55756e-226	0.239702	1.16517
PLA2G7	9.94474e-226	-0.648341	-3.57646
TINAG	2.82088e-225	0.000950791	6.30127
COL11A1	4.32776e-225	0.105406	1.86287
FGF15	4.32776e-225	-0.945475	-4.28029
MAPK8	1.62721e-224	0.301634	0.939347
ORMDL2	1.03809e-223	-0.339939	-0.812047
ELOVL6	1.74818e-223	0.368166	0.982832
KCTD12B	2.85814e-223	0.146007	1.57038
CLDN6	3.89239e-223	-1.74928	-5.54767
FABP7	4.56746e-222	-0.853288	-4.60809
GRB7	5.13393e-222	-0.66367	-3.33521
RFX4	6.61983e-222	-1.07168	-4.2279
LIMD2	2.54712e-221	0.354621	0.623177
CAMSAP3	2.56388e-220	-0.653908	-3.66867
NCALD	6.0754e-220	0.120759	1.70277
STX3	9.61908e-220	-0.565167	-2.37591
COL12A1	1.6653e-219	0.0147754	3.15518
OTX2	4.73782e-219	-0.417812	-1.25428
KCNK1	1.85891e-218	-0.513597	-2.31318
CNTNAP2	6.47852e-218	-0.697976	-3.68889
PDZD4	3.69897e-216	-0.521802	-2.40813
DSEL	6.83859e-216	0.115027	1.53194
APBB2	8.88219e-216	0.210346	1.1538
ANXA3	1.08294e-215	0.115881	1.77718
RCN2	1.59949e-215	0.386853	0.686673
RAB25	1.83994e-215	-1.18878	-5.66453
GMFG	3.96144e-215	-0.5876	-3.33007
AJAP1	1.96079e-214	-0.642856	-3.35211
NXN	4.4034e-214	0.435903	0.853733
GRRP1	1.08276e-213	-0.575465	-1.98894
LMO1	1.62939e-213	-0.850667	-2.72094
HSD17B10	2.97713e-213	0.287778	0.511636
FOXB1	3.86169e-213	-0.845885	-2.6321
PLCH1	7.89636e-213	-0.560976	-2.58209
RAB3IP	8.64484e-213	-0.359363	-1.15501
ILDR2	9.34547e-213	-0.68218	-2.27022
HSP90AB1	1.22075e-212	-0.18623	-0.269557
COL1A2	1.8267e-212	0.202807	1.64829
TALDO1	3.17483e-211	-0.263008	-0.446277
MAPK12	3.64392e-211	-0.475408	-1.84353
IFITM3	3.94431e-211	-0.536421	-1.78602
PDK1	7.23683e-211	0.371712	0.986568
TSPAN6	2.05804e-210	0.323076	0.577826
MIR124-2HG	2.13919e-210	-0.792022	-3.60438
PFN1	2.82428e-210	0.254191	0.375399
CLDN1	2.90999e-210	0.00907998	3.9826
DNAJC1	6.25561e-210	0.40783	0.968672
MT-CO3	9.29481e-210	-0.312615	-0.446289
L1TD1	1.77776e-209	-0.908125	-4.2488
NIPSNAP1	1.87185e-209	-0.356301	-0.952407
LARGE2	2.15331e-209	-0.596534	-3.3279
IRX5	7.36845e-209	0.561376	1.1291
TMOD3	7.61398e-209	0.340824	0.795399
ZSCAN10	9.07144e-209	-0.549108	-3.03121
ALPL	1.0021e-208	-0.631008	-3.21377
DSG2	1.12795e-208	-0.937655	-5.19418
GPD2	4.15796e-208	-0.392807	-1.49595
NR6A1	5.87707e-208	-0.399696	-0.862688
TSPAN13	1.49768e-207	-0.455119	-1.31998
DDAH2	2.31214e-207	0.386004	0.668775
KHDRBS3	3.268e-207	-0.386364	-0.974585
KRT8	3.40054e-207	-1.04799	-2.20387
WWC1	5.46939e-207	-0.447506	-1.72262
CYSTM1	6.76041e-207	-0.779191	-4.7124
SEPT11	9.38288e-207	0.365425	0.63369
DPYD	4.77214e-206	0.0183965	2.94376
QPRT	5.08069e-206	-0.505812	-2.43028
CP	1.05479e-205	0.00495873	4.20033
PCSK5	1.85958e-205	0.0766483	1.9003
PPDPF	2.14951e-205	-0.312398	-0.627548
S100A11	5.63779e-205	0.237484	1.30542
RAB34	7.48056e-205	0.38054	0.700101
FAM114A1	3.52288e-204	0.0909457	1.71642
UQCRQ	9.52257e-204	-0.258641	-0.419493
HSP90AA1	2.54931e-203	-0.243586	-0.356749
FKBP7	3.26918e-203	0.0696407	1.83137
HSPB1	1.00614e-202	-0.963335	-4.57049
HEG1	1.56313e-202	0.121482	1.51811
GCLM	4.71719e-202	-0.330932	-0.9179
X9530068E07RIK	6.7516e-202	0.349908
CELSR1	4.83668e-201	-0.516099	-2.46732
CKS1B	5.33887e-201	0.231894	0.376597
TMA7	8.21055e-201	-0.188485	-0.27981
DACH1	1.06744e-200	0.186151	1.39609
IRX1	1.17542e-200	0.371524	1.26549
EML4	4.52447e-200	0.334163	0.601671
MYL12A	5.29935e-200	0.317907	0.543964
NKTR	1.36594e-199	0.347989	0.620879
FAM60A	1.52234e-199	-0.31238	-0.504544
ADAMTS1	1.98153e-199	0.101707	1.65139
CFC1	4.07281e-199	-1.44985	-6.6574
ANKRD55	1.31044e-198	0.0035752	4.63862
PTX3	2.92446e-198	0.0128935	3.37643
SYT11	6.12232e-198	-0.565915	-2.18198
DSE	7.96198e-198	0.216899	1.12498
APOC1	3.34417e-197	-0.799097	-3.92059
NYNRIN	1.03125e-196	0.273206	0.958128
GAS1	1.047e-196	0.382221	0.95863
WIPI1	1.56416e-196	0.153006	1.31746
SHMT2	8.82729e-196	0.348534	0.723255
ENC1	9.28935e-196	-0.520126	-2.08413
AP1M2	1.17526e-195	-1.03045	-5.89834
BMI1	1.33261e-195	0.238777	1.04812
PRKCZ	2.02705e-194	-0.380497	-1.63164
CLDN7	4.66483e-194	-1.82759	-5.46495
GM29418	7.47899e-194	0.00869669	3.60583
MAPK8IP1	2.80736e-193	-0.433048	-1.89497
HOXB2	8.80041e-193	-0.928259	-2.819
ZFHX2	2.1642e-192	-0.413258	-1.74149
LHX5	8.50347e-192	-1.12829	-4.54435
METRNL	2.56789e-191	0.0396437	2.32253
NUP210	5.41121e-191	-0.505491	-2.87223
SLC6A6	8.32852e-191	0.350028	0.83915
PDLIM2	1.47392e-190	0.141107	1.41336
ZIC1	2.74821e-190	0.0497171	2.67465
ASAP1	1.43272e-189	0.371982	0.796723
RGS10	3.10812e-189	-0.448196	-2.23077
PKN2	6.37435e-189	0.287656	0.519833
X1810022K09RIK	6.53789e-189	-0.300209
STXBP2	8.75463e-189	-0.377747	-1.5028
SALL2	3.24167e-188	-0.509328	-1.3939
PFKP	6.5489e-188	0.155276	1.3078
GKAP1	1.15284e-187	-0.356723	-1.01785
ZFP365	2.08652e-187	0.0860252	1.7155
RGMB	1.00498e-186	0.143177	1.39658
TSHZ2	2.42368e-186	0.143785	1.51672
ZFP503	2.8188e-186	-0.651432	-1.89736
ITGB1	4.88476e-186	0.396118	0.704349
TCF15	4.17551e-185	0.266493	1.11295
ZFP219	5.71042e-185	-0.395521	-1.23266
SPTBN1	7.73915e-185	0.502317	0.857881
CCNY	9.02708e-185	0.296113	0.755391
GCHFR	1.51367e-184	0.222672	1.25783
SDK1	2.18251e-184	0.0378532	2.16115
SSR1	3.1848e-184	0.321281	0.608497
NFATC4	7.08354e-184	0.128382	1.34423
STARD10	1.11407e-183	-0.538888	-2.15267
DERA	1.50383e-183	0.324931	0.638905
NHSL2	7.69301e-183	0.130415	1.43545
SRPK1	1.06239e-182	-0.255883	-0.421558
CCDC34	5.82148e-182	0.273919	0.480539
KIT	7.36276e-182	-0.5449	-2.6006
OAF	1.66552e-181	0.255169	1.08619
ZCCHC18	2.80345e-181	-0.511062	-2.86719
HP1BP3	7.7865e-181	0.330478	0.820253
IL6ST	9.94343e-181	0.258196	1.05066
EMP1	1.29464e-180	0.0535173	2.07094
COL6A1	1.87283e-180	0.0198644	2.77538
SAV1	2.19762e-180	0.294475	0.869672
WSCD1	4.77038e-180	-0.611704	-3.29842
EFEMP1	1.80042e-179	0.0252266	2.44737
EYA2	6.10511e-179	0.113786	1.54671
DEK	8.26897e-179	-0.227947	-0.333606
AXIN2	1.11323e-178	0.324103	1.08946
GM5127	1.14559e-178	0.000463052	6.91862
TJP2	1.9879e-178	-0.379906	-1.33057
PDZPH1	4.03041e-178	-0.768757	-4.34174
AKR1A1	4.57187e-178	0.253907	0.437144
LRRN4	1.06931e-177	-0.751051	-4.04733
TENM3	1.4208e-177	0.349454	0.90971
BCL2	1.49712e-177	0.14952	1.35649
IMPAD1	2.8253e-177	0.338621	0.668771
PTGFR	5.71742e-177	0.0334125	2.27308
SCARA3	7.88101e-177	0.0551159	1.94237
SERINC2	1.19913e-176	-0.530128	-3.22134
HOXA1	1.5185e-176	-1.00614	-3.36479
SCUBE1	2.24861e-176	0.146134	1.49926
HES5	4.32538e-176	-1.00697	-3.53484
TM4SF1	4.49183e-176	0.00755817	3.64841
SDF2L1	5.94561e-176	0.34769	0.657095
JARID2	7.66621e-176	-0.405521	-0.947778
WNT16	3.28724e-175	0.0331838	2.27674
PLOD1	3.28932e-175	0.157649	1.17099
JPH4	3.3578e-175	-0.720876	-4.48206
SOX12	1.33188e-174	0.352211	0.77316
MBNL2	1.37841e-174	0.251174	1.14873
CSRP2	2.09507e-174	0.694742	0.911366
MBP	3.15532e-174	-0.52951	-3.18497
MTCH1	1.57778e-173	0.276708	0.474129
VCL	1.64363e-173	0.271425	0.87993
PFDN1	3.49882e-173	-0.218961	-0.364733
CD81	4.67302e-173	0.318012	0.563349
PIPOX	5.12393e-173	-0.590913	-4.39179
GHR	5.43305e-173	0.0715016	1.71019
RND2	7.88214e-173	-0.442117	-2.19544
XPNPEP2	1.26442e-172	0.00961595	3.2748
LAMB1	1.66741e-172	0.367506	0.965732
CAMKV	6.56106e-172	-0.522623	-3.1786
CACNG4	8.79051e-172	-0.571587	-2.8907
RIC1	1.28483e-171	0.149524	1.22038
DZIP1	1.29818e-171	0.132194	1.27237
RPS29	1.90798e-171	-0.218998	-0.315298
X1810058I24RIK	2.35274e-171	0.24578
PKDCC	2.533e-171	0.619259	0.986844
WIPF3	4.98885e-171	-0.655819	-4.85226
PARD6G	6.42595e-171	0.314616	0.859481
FBXO44	8.27582e-171	-0.42702	-2.56331
HESX1	1.16353e-170	-1.38611	-4.50154
TAL2	1.18187e-170	-0.887423	-3.8109
BNIP3L	1.75482e-170	0.296458	0.484659
MAGED1	2.81923e-170	0.346271	0.621106
SFRP5	4.26378e-170	-1.18207	-5.72092
TOMM7	1.02665e-169	-0.219613	-0.325893
TAF7	1.08208e-169	-0.296503	-0.632997
VCAM1	4.16217e-169	0.0271922	2.28875
BICD1	5.80075e-169	-0.416613	-1.79237
TTC3	5.05582e-168	0.267308	0.440025
TUBB4A	1.07435e-167	-0.444627	-1.90973
ZCCHC11	2.46431e-167	0.310945	0.564481
CRB3	2.59552e-167	-1.23438	-5.75816
EFNB1	7.51114e-167	0.407559	1.00635
MCF2	1.14774e-166	-0.827897	-5.57698
CKAP4	3.79598e-166	0.382398	0.657261
CCND3	6.83931e-166	0.347467	0.627299
CCBE1	1.84671e-165	0.0198233	2.70547
CD302	1.90218e-165	0.220734	1.03139
SIX3	2.0541e-165	-1.44272	-3.38999
VRTN	2.12779e-165	-0.796329	-7.71664
PAX6	3.75578e-165	-1.19763	-3.455
H2AFJ	1.33556e-164	-0.268937	-0.503334
ACTN1	1.471e-164	0.408406	0.704114
IKBIP	2.61344e-164	0.205424	1.03193
NRIP1	6.72295e-164	0.456064	0.942984
MAPK8IP2	7.20751e-164	-0.566526	-3.70988
LRIG3	7.37832e-164	0.298158	1.06399
CAR3	1.94493e-163	-0.743748	-3.84302
FAM169B	3.39903e-163	0.0233182	2.5006
VASN	3.686e-163	0.0848277	1.53229
IER2	5.52686e-163	0.365813	0.664774
IL11RA1	6.83705e-163	0.184805	1.17949
GJC1	7.41108e-163	0.384563	0.675504
H2-D1	9.52533e-163	-0.401193	-1.44096
GOT1	2.05259e-162	-0.288735	-0.734263
ACOT7	2.58087e-162	-0.362791	-1.40083
ITPR1	2.66798e-162	0.205925	1.17773
SPRED1	3.46301e-162	0.416185	0.840141
RPS21	4.59819e-162	-0.17579	-0.253588
PTPRD	1.34252e-161	0.137717	1.38863
RECK	4.51786e-161	0.0599997	1.71848
PSIP1	8.48223e-161	-0.278977	-0.431751
TSPAN9	1.11415e-160	0.185014	1.18383
MXD4	1.66584e-160	0.248723	0.990549
MEIS1	1.73909e-160	-0.567094	-1.83101
MAGT1	3.72981e-160	0.347277	0.666674
HMGA2	3.75465e-160	0.513003	0.641206
HDAC6	3.6056e-159	-0.415596	-1.33725
S1PR2	4.78157e-159	0.171787	1.18819
PARM1	1.23103e-158	0.0623495	1.93628
LAMA5	3.42496e-158	-0.432727	-2.21577
FGFR2	5.69468e-158	-0.438493	-1.54012
DSP	9.44502e-158	-0.557339	-2.36279
DAAM2	1.39404e-156	0.0399145	2.06705
NEDD4	1.82145e-156	0.226235	0.351193
ROR1	3.34369e-156	0.135841	1.25949
SLC22A23	8.8629e-156	-0.483676	-2.69931
RPL38	9.47485e-156	-0.187841	-0.272168
PGF	9.61128e-156	0.0719334	2.01122
NRCAM	1.14745e-155	-0.657475	-3.80573
COTL1	2.85026e-154	-0.428819	-1.18812
IGFBPL1	3.17993e-154	-0.451444	-1.67366
METTL9	5.81424e-154	0.229979	0.397445
SMARCA2	6.45074e-154	0.3156	0.8097
PLEKHH2	1.19526e-153	0.0990471	1.26673
SOX6	3.39305e-153	0.0795793	1.62601
EPB41L4AOS	3.74621e-153	-0.289902	-0.649339
GATA6	4.00485e-153	-0.928354	-3.00043
CCDC177	6.75879e-153	-0.538762	-3.12687
TOP2B	8.03657e-153	0.347862	0.647379
CRYBG3	8.42171e-153	0.0829253	1.47272
MT-ND5	2.16017e-152	-0.249585	-0.366458
GPX4	2.35936e-152	0.23381	0.364857
SNX10	1.5473e-151	-0.339641	-1.21675
THSD4	5.71711e-151	0.0634734	1.68506
GABARAP	7.37472e-151	0.253274	0.445817
TRP53I11	8.61645e-151	-0.421035	-1.55259
SMIM22	9.33118e-151	-0.662813	-4.31489
CDK7	1.556e-150	0.289495	0.555707
NUAK2	1.93876e-150	-0.454022	-2.06774
SNHG11	1.96697e-150	-0.394122	-1.29309
C1GALT1	2.54399e-150	0.194006	0.786202
MTAP	3.53277e-150	0.317371	0.556909
GSTT2	9.48257e-150	-0.45481	-2.99174
PEA15A	1.07611e-149	-0.361571	-1.2602
BTF3	1.16901e-149	0.147679	0.216151
NEBL	1.20374e-149	-0.989364	-4.31735
X1700013H16RIK	1.23017e-149	-0.551829
ZFP637	1.61706e-149	0.260783	0.714169
SMS	1.99087e-149	-0.300747	-0.456449
ANXA5	3.77045e-149	0.261726	1.02795
APELA	4.06265e-149	-0.99381	-3.88984
SFT2D2	4.18579e-149	-0.359282	-1.76624
RTN1	6.45711e-149	-0.412703	-1.73464
USP29	7.48797e-149	0.181374	1.21495
RPS2	8.25324e-149	0.163867	0.237886
DPT	1.04276e-148	0.00246283	4.53491
FLNC	1.50278e-148	0.193479	1.13385
SEPT6	1.27172e-147	0.335532	0.719462
MEF2C	1.7754e-147	-0.849618	-2.35579
BNC2	1.65722e-146	0.0125325	2.8586
COL9A2	2.84926e-146	0.0488435	1.88459
TMEM123	4.25297e-146	0.238073	0.915391
ITM2C	5.39072e-146	0.29753	0.699006
WLS	8.67066e-146	0.611426	0.790361
ARHGAP42	9.07694e-146	0.16676	1.03643
ACTB	9.72843e-146	0.193187	0.283602
GLT8D2	9.82294e-146	0.00384189	3.99358
ONECUT2	1.25585e-145	0.0548469	1.88524
PITPNC1	1.42912e-145	0.194	0.961135
RASGRP3	3.63526e-145	-0.779922	-3.38026
MIRG	1.16779e-144	-0.406517	-1.68782
SESN3	2.46164e-144	0.272293	0.779441
GM10076	3.19997e-144	-0.419951	-0.625468
SVOPL	3.31691e-144	0.00761278	3.35522
GREM1	8.16756e-144	0.0780055	1.85354
CALCA	1.126e-143	-0.786235	-4.19192
RBPMS	1.24064e-143	-0.354293	-0.748855
X1190002N15RIK	2.07122e-143	0.186017
SNRPN	2.80425e-143	-0.338923	-0.720323
A830018L16RIK	3.45842e-143	-0.551194	-3.67691
HIKESHI	4.26426e-143	0.233421	0.419747
PAFAH1B3	4.72995e-143	0.256642	0.465582
MPHOSPH8	5.61558e-143	-0.246456	-0.459164
MN1	6.99787e-143	0.214556	1.07392
ASB4	7.08809e-143	0.133051	1.49838
LHPP	1.12595e-142	-0.38765	-1.58865
WBP5	1.24763e-142	-0.292339	-0.461249
RCN1	1.79065e-142	0.310638	0.57814
CNDP2	1.82407e-142	-0.316594	-0.852307
PJA1	2.88097e-142	0.321377	0.599439
FOXD4	3.61524e-142	-1.03512	-4.33673
GJB3	4.60612e-142	-0.886501	-4.70857
PRDX4	5.11412e-142	0.225441	0.370792
KIF1A	6.10684e-142	-0.476339	-2.95192
HACD1	9.64462e-142	0.329344	0.641293
SLC9A3R1	9.73881e-142	-0.363944	-0.863605
SLC7A3	1.8642e-141	-0.654141	-3.99188
ALDH1A2	2.53193e-141	-1.10784	-2.92635
CAR2	3.50278e-141	-0.509775	-1.51122
FZD7	4.99855e-141	0.287436	0.949506
DUSP9	6.29412e-141	-0.457948	-1.24021
FOXL1	6.63929e-141	0.0178881	2.69426
PRSS8	7.59529e-141	-0.834259	-4.06648
X2700060E02RIK	1.0544e-140	-0.181596
RNF122	1.17575e-140	0.150369	1.09627
NFASC	1.72423e-140	-0.643114	-4.4878
BCAR1	2.55012e-140	0.237309	0.77987
RSU1	2.78267e-140	0.301493	0.669553
NPTX2	2.89594e-140	-0.490644	-2.41869
TSPAN33	3.27803e-140	-0.413687	-2.74814
PLTP	3.74593e-140	0.0760313	1.58648
SULT4A1	7.45506e-140	-0.391034	-2.5052
TRIM25	8.59573e-140	-0.396317	-2.31688
WNT8A	2.34816e-139	-1.53382	-8.08896
BEX2	2.69024e-139	-0.269917	-0.507799
ZYX	2.86261e-139	0.313708	0.746451
HDAC2	6.03987e-139	0.243486	0.442544
REEP5	1.56779e-138	0.428227	0.760953
KRTCAP3	2.51696e-138	-0.44627	-2.75948
ZHX1	2.59693e-138	0.195859	0.968877
CDH4	2.9814e-138	-0.422191	-2.61521
NKD1	6.90382e-138	0.257004	0.945751
RBPMS2	8.81705e-138	-0.357261	-0.957523
A	1.16211e-137	0.00546648	3.64748
LRRC4B	2.16795e-137	-0.491914	-3.46733
IER3	7.56365e-137	0.065912	1.77571
TFAP2A	9.01273e-137	-0.847247	-3.44092
SNCAIP	1.33941e-136	0.0399375	1.92058
ESRP1	1.54809e-136	-0.847517	-5.51754
BICC1	3.14751e-136	0.163015	1.2022
SLITRK5	4.56756e-136	-0.505757	-3.33508
HOOK3	4.66432e-136	0.28308	0.732258
SELENOF	5.44132e-136	0.214119	0.350005
STARD8	6.35412e-136	0.145949	1.04541
FRMD5	6.82894e-136	-0.478965	-3.35669
RANGAP1	1.32836e-135	-0.253757	-0.549613
TCF4	1.73862e-135	0.323803	0.589632
MYO6	3.84713e-135	0.12239	1.29657
RND3	1.214e-134	0.326382	0.855568
MAPK13	1.46546e-134	-0.681997	-4.66081
FN1	1.58139e-134	0.6161	0.934138
CALR	1.60479e-134	0.271506	0.412826
SLC16A13	1.6979e-134	-0.39734	-2.34937
P4HB	2.56923e-134	0.266966	0.465659
PIN4	2.7642e-134	-0.219776	-0.432425
ATP5K	7.32857e-134	-0.253085	-0.42961
DYRK3	8.09976e-134	-0.329724	-1.26689
PLCD1	1.40392e-133	0.0568495	1.60578
FNDC3C1	1.60959e-133	0.315486	0.721669
SULF2	3.99849e-133	0.281287	0.817355
X1700019D03RIK	4.08039e-133	-0.597024
PDIA4	9.2295e-133	0.296847	0.547831
GCAT	1.20102e-132	-0.340058	-0.988124
TGFBR3	2.04847e-132	0.106311	1.26004
GM27032	2.06261e-132	-0.647427	-4.73722
PDCD5	2.22434e-132	0.202663	0.337477
ENO1B	2.74009e-132	0.256494	0.481116
SPIN2C	6.33299e-132	0.21915	0.946805
TNRC18	1.05673e-131	0.273352	0.821917
ARF4	1.11924e-131	0.237779	0.420932
HOMER2	1.25467e-131	-0.399943	-1.75043
NDUFS6	1.61141e-131	-0.191023	-0.314136
AMOTL1	1.8261e-131	0.303357	0.677324
CDC42EP4	1.8848e-131	0.169886	1.01867
P3H1	1.92677e-131	0.16308	1.04003
KLF6	3.67212e-131	0.246947	1.04153
TXNDC5	9.43103e-131	0.291065	0.554255
GOLGB1	9.48942e-131	0.335253	0.576481
ALX1	1.47507e-130	0.101994	1.06831
SPINT1	1.54338e-130	-0.609724	-4.12155
TMEM263	2.04648e-130	0.220654	0.873079
ETFB	2.20377e-130	0.278729	0.528848
SH3RF1	4.70083e-130	0.179637	0.987319
CNBP	5.34053e-130	0.194718	0.300828
PCGF5	1.05984e-129	-0.564757	-2.82271
X2900011O08RIK	2.72838e-129	-0.633673
AKT1	5.38219e-129	0.303788	0.712565
PMM1	1.06663e-128	-0.288655	-0.773149
RPL31	1.38363e-128	-0.137834	-0.203076
USP44	1.94102e-128	-0.358423	-2.00472
PEAR1	2.00161e-128	0.0171945	2.36302
MAP7	2.78446e-128	-0.645705	-4.69847
ATOH8	4.02564e-128	0.0739061	1.42047
COX4I2	4.48654e-128	0.179363	1.05917
PARVA	1.89345e-127	0.236465	0.893576
TUBA1A	1.99718e-127	0.312297	0.494209
SERINC1	2.60284e-127	0.267269	0.632015
GOLIM4	3.83083e-127	0.298449	0.679075
CYTH3	4.07814e-127	0.116323	1.08919
PLPPR3	5.99232e-127	0.0816811	1.36364
KIRREL	7.76071e-127	0.179401	0.977753
JUP	7.92456e-127	-0.45449	-2.5116
PLK2	8.2263e-127	0.0661816	1.49822
ECI2	1.50613e-126	0.232125	0.72242
OCIAD2	1.73835e-126	-0.371708	-2.42314
PDK3	1.99694e-126	0.255885	0.650804
MEX3C	2.23473e-126	0.237322	0.714575
PTPRU	2.47092e-126	0.0384331	1.90646
ECI1	2.69482e-126	-0.336892	-1.25135
PRDX3	3.00326e-126	0.288769	0.624019
LRP11	4.55962e-126	-0.33675	-1.91106
FARP1	5.58431e-126	0.211769	0.83946
SPTSSA	8.20857e-126	0.241735	0.45272
KLHL22	8.46669e-126	0.187751	0.906991
DPH3	1.29652e-125	-0.219831	-0.40387
ACSL3	1.5492e-125	0.299044	0.667625
CAR4	1.98837e-125	-0.440361	-1.12886
PTN	2.18303e-125	1.39912	0.835477
C1QL1	2.41773e-125	-0.407979	-2.1677
PAFAH1B2	2.8531e-125	0.245577	0.469275
APITD1	3.73001e-125	-0.258431	-0.630547
CYP20A1	4.14402e-125	0.251626	0.74054
PRELID1	6.96373e-125	0.168497	0.279324
EFNA2	1.85456e-124	0.316968	0.846287
TUBB4B	2.00243e-124	-0.233635	-0.412415
CDX1	5.56215e-124	-1.38361	-4.45586
KLC3	8.11609e-124	-0.49447	-3.37516
TMC4	8.72968e-124	-0.309391	-1.25874
AFF2	1.4142e-123	0.026072	2.07791
X2900026A02RIK	1.65433e-123	-0.362864
CGN	7.36834e-123	-0.467322	-2.82417
IFFO2	7.73812e-123	0.0856607	1.32741
NCOR2	1.35273e-122	0.226269	0.699264
HAND2	1.60597e-122	-1.18949	-4.36477
ZFP985	2.96372e-122	-0.459785	-3.28726
VGLL4	3.70079e-122	0.331464	0.797903
LHFP	6.22391e-122	0.113731	1.14575
KAT6B	9.0894e-122	0.18829	0.847975
SKAP2	1.11357e-121	-0.339855	-1.37667
TMEM5	1.19296e-121	0.272888	0.686293
SNAPC5	1.75905e-121	-0.252935	-0.637463
MTMR7	2.87218e-121	-0.452888	-3.33618
DPYSL2	3.94837e-121	0.311851	0.686085
TCAF1	4.07521e-121	0.300052	0.675613
MRPL34	4.20003e-121	-0.249479	-0.401526
RER1	4.51646e-121	0.22372	0.415137
AMOT	4.52825e-121	0.325004	0.810247
SYDE1	4.66128e-121	0.0810073	1.26295
SRGAP3	6.38422e-121	-0.413962	-2.47194
LATS2	6.97831e-121	0.122582	1.11092
RPS15	7.92269e-121	-0.115825	-0.168074
LDB2	1.18076e-120	0.0987382	1.25978
IQGAP1	1.60622e-120	-0.352729	-0.880519
PRICKLE1	3.75127e-120	0.115237	1.23581
SMAD5	5.77604e-120	0.205275	0.794226
PCOLCE2	2.10113e-119	0.120909	1.20539
PRKD3	4.4003e-119	0.226359	0.684694
TRO	4.43039e-119	0.263459	0.745068
HSPA5	5.17438e-119	0.251662	0.388283
X3425401B19RIK	6.62239e-119	0.0079309
DST	8.26002e-119	-0.360915	-1.01523
SYNGR2	1.21367e-118	-0.316045	-1.11121
MYL7	1.25254e-118	-0.859201	-2.3178
F3	1.42282e-118	0.0358991	1.87237
EXOSC2	1.59034e-118	-0.396208	-0.80319
NUDT9	2.06632e-118	0.278347	0.66206
SCUBE3	4.37764e-118	0.0398656	1.75895
NOVA2	7.2425e-118	-0.445792	-3.0191
BEX3	1.4435e-117	-0.237101	-0.350144
DTX4	1.8072e-117	-0.354832	-2.00268
ARVCF	2.46001e-117	-0.316285	-1.36274
SSBP3	3.75975e-117	0.237894	0.435209
ATP5E	3.97765e-117	-0.171545	-0.253958
CIAPIN1	3.99629e-117	-0.211066	-0.394586
MIAT	4.70943e-117	-0.494922	-2.91008
ZFP36L1	5.22264e-117	0.391157	0.649695
MINPP1	6.24682e-117	0.272577	0.550795
HS3ST3A1	7.86846e-117	0.0347862	1.89583
NTF3	9.001e-117	0.0292637	2.06922
POLR2L	1.70119e-116	-0.286336	-0.645218
PHYHIPL	2.54145e-116	-0.375971	-2.53673
NEFH	3.3646e-116	-0.656542	-4.3219
RIPK4	5.04401e-116	-0.595087	-4.63202
PTPN13	7.54018e-116	-0.318905	-0.781678
LPAR6	7.61685e-116	0.306836	0.754817
WDR1	1.01736e-115	0.267084	0.706716
RP23-145I16-5	1.09146e-115	-0.685783
TRIB2	1.44638e-115	0.106878	1.1694
OLFML1	1.6233e-115	0.00788804	2.98655
XBP1	1.767e-115	0.321342	0.6541
ADGRV1	1.91576e-115	-0.424873	-2.52476
PYCARD	1.98594e-115	-0.332501	-1.56725
COX19	2.10691e-115	0.245192	0.500389
ANGPT1	2.80081e-115	0.0536305	1.69325
EIF3C	3.26843e-115	-0.152924	-0.242044
GFPT1	3.78005e-115	0.23215	0.792689
SOGA3	5.0113e-115	-0.347753	-1.63028
BIK	5.33069e-115	-0.633083	-3.82995
CDC42	5.8308e-115	0.182661	0.311399
MYC	7.32236e-115	0.208085	1.0104
H2AFY	8.3166e-115	0.26582	0.448173
CAPG	1.13184e-114	-0.375764	-2.39836
ST7	1.20971e-114	0.1089	1.12543
TOM1L1	1.82392e-114	-0.295462	-1.25828
CRIM1	2.76784e-114	0.0699899	1.42665
SRP9	3.34877e-114	0.216746	0.38873
AFDN	3.5939e-114	-0.280589	-0.583918
FGF3	4.36974e-114	-0.77276	-4.07352
VKORC1	6.98661e-114	0.246298	0.740958
SRSF9	7.74519e-114	0.214458	0.365397
DNAJC19	9.12375e-114	-0.212648	-0.395464
FAM120A	1.45459e-113	0.241878	0.675221
LUZP1	1.49607e-113	0.247561	0.464408
TSPAN18	2.01478e-113	-0.409944	-1.65928
MPRIP	3.04192e-113	0.254796	0.506407
CACNB3	6.67443e-113	-0.309093	-1.58561
TSLP	6.77215e-113	0.00608539	3.44488
ACP6	7.07923e-113	-0.279586	-1.23168
DUSP23	8.43562e-113	0.109011	1.11641
TNNI1	9.32471e-113	-0.906476	-3.26944
CALU	1.15994e-112	0.260705	0.528571
LPL	1.24327e-112	-0.323233	-1.3891
PHOX2A	2.13658e-112	-0.762934	-4.24972
RAB3A	2.14577e-112	0.0466557	1.5019
GALNT1	3.37528e-112	0.312517	0.61548
ARHGAP29	3.89536e-112	0.34337	0.830274
RAP1GDS1	4.42528e-112	0.217837	0.740208
MAPK11	5.72462e-112	-0.382695	-2.69441
FHL2	1.25733e-111	0.0965029	1.26316
BCAR3	1.866e-111	-0.377748	-2.46286
JMY	2.24909e-111	0.202413	0.827795
CDX2	2.24909e-111	-1.82109	-7.94289
METRN	2.82822e-111	-0.321863	-0.843725
RIMS2	3.74278e-111	-0.396567	-2.83615
TOX3	5.60657e-111	-0.401629	-1.1374
FAM181B	6.39792e-111	-0.649295	-1.94441
PCDH1	6.98225e-111	-0.38412	-2.07003
RNF121	8.77993e-111	0.238931	0.561501
IRX3	8.95819e-111	0.473679	0.821176
DCDC2A	1.17528e-110	0.0369197	1.8785
GLTP	1.19168e-110	-0.263892	-0.77871
SCUBE2	1.78863e-110	-0.718898	-4.70139
MT-CYTB	1.84153e-110	-0.218448	-0.308556
SLCO5A1	2.45706e-110	-0.519859	-3.89692
TOR3A	3.05268e-110	-0.400522	-2.91988
HAX1	3.10968e-110	-0.221565	-0.565233
TTR	3.21938e-110	-1.33072	-4.748
NES	3.38395e-110	0.301304	0.759534
HAUS7	5.28667e-110	0.249853	0.641222
RPL9-PS6	9.18822e-110	0.19946	0.33721
PIANP	9.75993e-110	-0.34238	-2.2414
ADPRH	1.06238e-109	0.27367	0.529984
ZFP260	1.19083e-109	0.270486	0.579416
ASNA1	1.58355e-109	-0.215148	-0.506804
BAG2	1.67081e-109	0.269732	0.623935
FHL3	2.14001e-109	0.0894953	1.22546
LY6H	3.50712e-109	-0.645029	-4.32188
ID1	5.60585e-109	0.616281	0.884209
GATA4	5.79417e-109	-0.953312	-4.79748
FIGN	6.78313e-109	0.322752	0.757394
GNG5	1.3477e-108	0.125808	0.189368
EXOC2	1.87551e-108	0.137347	0.734418
IDE	2.09111e-108	-0.271248	-0.887528
SCAF11	2.59386e-108	0.222015	0.381422
FLNA	3.65644e-108	0.356804	0.613663
HDAC9	4.15531e-108	0.0207902	2.22418
PRKG1	5.06532e-108	0.0355604	1.6938
CDH13	5.22864e-108	-0.41347	-2.88632
LIX1	6.81993e-108	-0.458769	-1.48247
GPI1	7.36884e-108	0.198253	0.316781
GM26829	9.12116e-108	0.0281218	2.09909
ATP6V0E2	9.49504e-108	-0.385575	-2.95331
FKBP4	1.00417e-107	-0.168404	-0.252907
SLC35F1	1.10752e-107	-0.443951	-3.15317
TM9SF3	1.12446e-107	0.250928	0.465671
PGK1	1.19748e-107	0.301556	0.560531
RPL35	1.56155e-107	-0.194408	-0.287569
CYR61	1.61971e-107	0.133605	1.21086
PLEKHO1	1.99785e-107	0.285654	0.689931
LRRC58	2.60819e-107	0.215528	0.379546
PLCE1	2.74017e-107	0.12175	1.09118
CELF4	3.46851e-107	-0.319887	-1.72602
MNAT1	5.68154e-107	0.271228	0.515041
CPE	7.6033e-107	-0.320203	-1.16224
COLGALT1	7.74911e-107	0.251238	0.587424
MPP6	8.50749e-107	0.236128	0.424065
OBSL1	9.33442e-107	0.207758	0.760404
PRR5L	9.33442e-107	0.101389	1.18838
MTCL1	1.23801e-106	-0.31896	-1.01661
B4GALT4	1.30674e-106	0.0789466	1.30271
SLCO1A5	1.59044e-106	0.00084595	5.36785
LAMA2	2.321e-106	0.00900328	2.85431
HIST1H2AP	4.52786e-106	-0.642891	-1.12777
PLSCR3	5.50308e-106	0.186904	0.85152
POLR2M	5.85921e-106	0.181856	0.30441
CACNA1E	1.23923e-105	0.00803341	3.19215
CHGA	1.70476e-105	-0.408635	-3.30015
TAX1BP3	3.82318e-105	0.261913	0.795466
SEPT8	4.02968e-105	0.16712	0.805839
MIEN1	5.26744e-105	-0.223226	-0.551959
OLA1	6.44149e-105	-0.192312	-0.323086
PDAP1	7.86462e-105	-0.137921	-0.202466
EPS8	1.53304e-104	-0.361267	-2.12575
HN1	1.65926e-104	-0.225871	-0.380966
CCT7	1.89945e-104	-0.161472	-0.260313
EN1	2.43047e-104	-1.11608	-3.22066
SLC25A13	2.59299e-104	-0.246062	-0.678903
EXT2	2.6895e-104	0.201357	0.642911
ACRBP	3.1544e-104	-0.308431	-1.60792
RUNDC3A	3.85609e-104	-0.466611	-3.5894
MT-ATP8	5.94322e-104	-0.236577	-0.538398
HOXB4	6.04135e-104	-1.19457	-6.38361
PPP1R9A	6.23663e-104	-0.307874	-1.01218
RAB28	6.71698e-104	0.251502	0.634555
COPB1	8.04195e-104	0.242717	0.47883
DLL1	1.06734e-103	-0.625071	-3.20786
MICALL2	1.37285e-103	0.0182603	2.1969
SLC25A23	9.05465e-103	-0.296085	-1.44877
VPS36	1.06624e-102	-0.202606	-0.396833
STRBP	1.7539e-102	-0.231664	-0.479351
RASSF7	1.91273e-102	-0.276479	-0.983298
RFTN1	1.99946e-102	-0.37742	-2.75017
KDF1	2.43963e-102	-0.747803	-5.32937
GYS1	2.67841e-102	0.152481	0.829309
MDFIC	3.57502e-102	0.0725187	1.29995
LOX	4.36505e-102	0.00343313	3.87523
FMC1	5.16203e-102	-0.223421	-0.529487
QPCT	5.2505e-102	0.00766838	3.10488
ASXL3	5.63035e-102	0.0656989	1.34243
EI24	5.63162e-102	0.236304	0.497581
HSD11B2	7.07264e-102	0.223054	1.04153
SMIM10L1	8.01585e-102	0.261586	0.62472
SOX13	8.94272e-102	-0.332308	-1.32527
BHLHE41	1.10056e-101	0.0548879	1.52621
CERS4	2.05221e-101	-0.326545	-1.47799
PLXNC1	2.21995e-101	-0.390472	-2.72407
ATP7A	3.44754e-101	0.094217	1.12691
ST3GAL5	5.14294e-101	0.22597	0.884713
SLC35A1	6.10711e-101	0.251082	0.525274
SSR3	6.51e-101	0.232551	0.421228
MID1IP1	1.62036e-100	-0.328202	-1.16494
PDCD4	1.90752e-100	0.283878	0.597177
HRAS	2.41602e-100	-0.194264	-0.337675
SULF1	5.50284e-100	0.256296	0.822419
AFAP1	5.87119e-100	0.116847	1.063
TUBA4A	8.3609e-100	-0.476296	-3.27066
DHX32	1.26365e-99	-0.295134	-1.17843
AP1S2	1.30961e-99	0.149035	1.00408
MECR	1.38552e-99	0.198412	0.621943
LAMTOR4	3.20547e-99	-0.213592	-0.447145
PLXDC2	3.33428e-99	0.0962196	1.06443
OST4	9.4527e-99	0.211048	0.364384
RBM24	1.94288e-98	-0.492654	-1.78572
GJA1	1.9785e-98	-0.301122	-0.610454
DDR1	2.13565e-98	-0.29543	-1.24094
EXT1	2.17065e-98	0.238763	0.660477
BTG2	2.52626e-98	-0.313874	-1.53231
MYLK	2.88899e-98	-0.424556	-2.11355
SEC14L1	3.63621e-98	0.208489	0.706827
ARG1	4.77411e-98	0.128721	0.971878
PLA2G12A	5.39539e-98	-0.25176	-0.616292
STON2	8.49107e-98	-0.434428	-3.56038
H3F3A	8.6127e-98	0.141442	0.2059
NUP62CL	8.83317e-98	-0.32458	-2.1207
PHLDA1	1.01355e-97	0.403526	0.820414
REEP2	1.04775e-97	-0.3439	-2.62123
LRRC8C	1.34898e-97	-0.313138	-1.7424
GM8797	1.58796e-97	0.243093	0.437104
MACROD2	1.83738e-97	-0.277254	-1.12762
HDGF	2.27933e-97	-0.160014	-0.233317
RHPN2	2.81632e-97	-0.342942	-2.19105
RRAGB	3.56806e-97	-0.325403	-1.29688
PHACTR1	4.6256e-97	-0.467492	-2.24176
ERBB3	7.77488e-97	-0.595721	-3.64569
ANAPC13	7.78791e-97	-0.200264	-0.397232
SHOX2	1.24735e-96	0.0207672	2.41166
GGCT	1.26243e-96	-0.263337	-0.904158
TMEM237	1.80432e-96	-0.238707	-0.668745
STK26	2.90188e-96	-0.342244	-2.09712
FXN	3.13438e-96	-0.222937	-0.614438
GNB4	4.10779e-96	0.240028	0.79673
PPP1CB	4.55769e-96	0.233933	0.448277
MSH2	4.60061e-96	-0.232125	-0.51349
NAV1	6.50697e-96	-0.320643	-0.878377
X2610318N02RIK	6.67121e-96	0.243086
NMT2	6.72858e-96	-0.223243	-0.644458
SMDT1	7.05041e-96	-0.162486	-0.267732
NFAT5	7.62778e-96	0.222272	0.667643
PJA2	7.86247e-96	0.22966	0.644305
ZIC4	8.09897e-96	0.0102029	2.93637
H3F3B	9.5579e-96	0.133175	0.197874
SRGAP2	1.13279e-95	0.216755	0.700411
PDGFA	1.28568e-95	-0.387485	-0.96362
SCAMP5	1.29885e-95	-0.298731	-2.13148
ELAVL3	1.69558e-95	-0.574827	-4.04774
GM1673	3.65873e-95	0.366348	0.565364
EPB41L2	4.20799e-95	0.235331	0.740896
TCEAL5	4.21817e-95	-0.293544	-1.65977
ATP1B1	6.04119e-95	-0.433946	-2.33302
ADAM10	6.42476e-95	0.213096	0.768471
CD59A	6.64446e-95	-0.415274	-1.52191
SLC39A6	1.39718e-94	0.195644	0.767593
CTXN1	1.864e-94	0.292852	0.608823
MGARP	2.06663e-94	0.182502	0.807115
CCDC8	2.67218e-94	0.138974	0.893086
X2610008E11RIK	4.16244e-94	0.134802
RBM38	5.20359e-94	-0.283203	-1.03399
SH3GLB1	5.32617e-94	0.323513	0.546276
CCNG2	8.51648e-94	0.1299	0.947135
DHCR24	9.14924e-94	-0.265636	-0.845373
SHROOM3	1.42809e-93	-0.292101	-1.37745
FRMPD2	1.51682e-93	0.00512252	3.49049
WNT2	1.56551e-93	-1.16909	-5.23161
CCDC88C	1.7935e-93	-0.298592	-1.86592
TBX3	1.89316e-93	-0.644031	-3.34587
GSTT1	2.96645e-93	-0.507419	-4.06974
RCC2	5.61961e-93	-0.195077	-0.308313
NRP1	6.2199e-93	-0.481762	-1.83678
RNASEH2A	6.45557e-93	-0.214013	-0.498362
ERBIN	7.03551e-93	0.186282	0.803691
SERP2	1.00875e-92	-0.262713	-1.35894
SLC16A3	1.47948e-92	0.238203	0.408954
GM9493	1.77153e-92	0.176253	0.299632
RIMS3	2.69946e-92	-0.387172	-3.15839
RTN3	3.83974e-92	-0.208476	-0.365266
ADAM19	3.88899e-92	0.0905688	1.06743
ZMYND8	6.39872e-92	-0.245763	-0.561679
CPQ	7.05048e-92	0.0529778	1.43654
RALGDS	9.0125e-92	0.092138	1.0524
GAB1	9.28627e-92	0.139836	0.949717
ENO3	1.03e-91	0.313087	0.658909
MAP3K9	1.05691e-91	-0.350199	-2.96859
HIST1H2AK	1.24122e-91	-0.492105	-0.91973
MAP2	1.35955e-91	-0.382256	-2.68921
FREM2	1.62304e-91	-0.342885	-1.57352
SEPT2	1.97211e-91	0.238886	0.458793
UTF1	2.2807e-91	-0.85428	-5.93548
PAX3	2.41508e-91	-0.290458	-1.12065
EDN3	2.75737e-91	0.0429224	1.60106
RPL37	2.93419e-91	-0.137126	-0.19617
ECE1	3.04853e-91	0.204683	0.8058
CAPN2	3.3678e-91	0.225959	0.768839
RNFT1	3.38995e-91	0.146671	0.801097
CDKN1C	3.57186e-91	0.584961	0.843965
H2-Q4	3.90006e-91	-0.357683	-3.10936
URAH	4.76722e-91	-0.36596	-2.99235
X2310030G06RIK	4.78731e-91	-0.552253
SLC35F2	5.11052e-91	-0.29809	-2.16605
POU3F2	5.25564e-91	-0.564673	-2.80006
COL6A2	6.25972e-91	0.0195792	2.11734
LYAR	8.07403e-91	-0.190173	-0.296534
GATA5	9.80119e-91	-1.21349	-5.65709
CENPV	1.13466e-90	-0.286956	-1.18985
TIMM8B	1.23374e-90	-0.168356	-0.253605
LIFR	1.46759e-90	0.120713	0.985657
UBE2K	2.26968e-90	-0.200097	-0.341368
LMAN1	2.29342e-90	0.227029	0.422884
ABL1	2.42926e-90	0.196182	0.568998
NDUFV3	3.09672e-90	0.195987	0.345158
TTYH1	3.14076e-90	-0.519321	-4.48051
PALLD	4.40352e-90	0.334487	0.710333
KDR	6.03094e-90	0.144462	1.10257
FOXA2	6.03094e-90	-0.980696	-3.79634
IGSF9	6.31751e-90	-0.282354	-1.09882
FAM162B	6.4221e-90	0.0326524	1.83456
SMTNL2	6.99263e-90	-0.292681	-1.16231
TRIM54	8.00189e-90	-0.490261	-4.02561
UNG	8.44743e-90	-0.3086	-0.759986
FEZF1	9.87322e-90	-0.747337	-3.55306
RASSF2	9.8847e-90	-0.331379	-2.30508
ZFPM1	9.9967e-90	-0.369342	-1.57149
PON2	1.26037e-89	0.0979762	1.11993
TSNAX	1.46515e-89	0.22898	0.480556
X2700033N17RIK	2.5056e-89	-0.287817
ITPK1	2.74627e-89	-0.268112	-1.45767
APOBEC3	3.26025e-89	-0.26005	-1.72093
VAMP5	3.52779e-89	0.12075	1.29369
LETM1	3.7081e-89	-0.229407	-0.66502
CHST15	4.78584e-89	-0.384819	-2.62635
GRIK3	4.90183e-89	-0.461281	-4.31263
MT-ND2	4.9203e-89	-0.193129	-0.271683
FBXO2	5.54873e-89	-0.440634	-3.76468
RASIP1	1.01041e-88	-0.506471	-2.90703
NPM3	1.30566e-88	0.24166	0.417933
TOMM40	1.68468e-88	-0.182174	-0.293582
PRKCB	2.22136e-88	0.0434416	1.51146
SORBS2	2.29185e-88	-0.36808	-1.91567
TRABD2B	2.34278e-88	0.0933702	1.07279
CLDN3	2.38314e-88	-0.908371	-5.91437
CAPSL	2.64466e-88	-0.613777	-4.19118
SEMA3F	3.29295e-88	0.0959485	1.0997
D8ERTD82E	3.33237e-88	-0.272875	-1.14907
ALYREF	3.37859e-88	0.200121	0.345804
X2700081O15RIK	3.97001e-88	0.216799
PLEKHA6	4.59408e-88	-0.475917	-3.55183
SPCS3	6.668e-88	0.221665	0.602937
CDK18	6.93197e-88	-0.348734	-2.80242
CEP170B	7.62375e-88	-0.303837	-1.89241
RPP25	8.17342e-88	-0.393619	-3.23528
ARL3	1.04299e-87	0.205752	0.39287
ZFP536	1.30798e-87	0.0240331	1.94752
HAP1	1.49419e-87	-0.485827	-4.09041
SH3KBP1	1.54784e-87	-0.264725	-1.0899
KLF3	2.13205e-87	0.304927	0.673973
RHOA	2.67541e-87	0.154877	0.253091
FAM195A	3.43707e-87	-0.275255	-1.08878
DSTN	4.27498e-87	-0.226344	-0.398119
PAX5	5.79794e-87	-0.775149	-3.50753
SFRP1	5.79863e-87	0.0296322	-0.153179
TMEM163	6.03658e-87	-0.510336	-4.10579
SHC1	6.11467e-87	0.181819	0.75
EDIL3	7.03046e-87	0.0354525	1.60674
NUDC	8.49293e-87	-0.160392	-0.26189
SYNRG	9.15436e-87	-0.254452	-1.05863
SHB	9.72214e-87	-0.28752	-1.70824
ITM2A	9.76606e-87	0.282337	0.748332
CCDC136	1.04353e-86	-0.249382	-0.838733
RBFOX3	1.21093e-86	-0.389078	-3.09062
SHANK1	1.63325e-86	-0.329018	-2.76624
ST14	1.71899e-86	-0.679525	-5.01518
FHOD1	2.43424e-86	0.082584	1.06415
RAI1	2.67955e-86	0.189346	0.665938
CDC42EP3	3.14676e-86	0.0637811	1.37619
UNC13B	3.16865e-86	-0.285261	-1.91324
GOT1L1	4.57618e-86	0.0105453	2.70149
FHOD3	4.64127e-86	-0.313641	-1.68673
RHOU	4.65537e-86	0.27402	0.722351
SRPX	6.26974e-86	0.00709241	2.87353
MT3	1.25108e-85	-0.501653	-4.16705
SPRED3	1.5633e-85	-0.293062	-1.98458
CBLN1	2.04092e-85	-0.378216	-2.45679
AU020206	2.14703e-85	-0.253593	-0.95368
TCF25	2.36252e-85	0.185434	0.345589
ZDHHC2	2.75697e-85	-0.239432	-0.979175
GPC6	3.07394e-85	0.276005	0.605104
FMN2	3.19223e-85	-0.341223	-2.69792
X5330434G04RIK	3.19954e-85	-0.301568
NELL2	4.93524e-85	-0.385618	-3.31016
CLYBL	5.53905e-85	0.196885	0.663707
ACTA2	6.78604e-85	0.146449	0.76597
JAKMIP2	7.65921e-85	-0.28143	-1.58603
ZIM1	1.05958e-84	0.0303921	1.7278
IGFBP5	1.14823e-84	0.348205	0.796559
FUOM	1.15973e-84	-0.317777	-2.33068
NENF	1.18442e-84	0.299141	0.549379
IGSF21	1.20547e-84	-0.375247	-3.07605
RPA3	1.24762e-84	0.257564	0.477931
PLEKHA1	1.35365e-84	-0.300854	-0.852625
SEC23A	2.00899e-84	0.175482	0.701836
APOA1	2.00899e-84	-0.766709	-3.57947
CBX7	2.10966e-84	-0.330873	-2.62094
KIF21B	2.24054e-84	0.0970771	0.979832
OTX1	2.51997e-84	-0.527209	-2.48368
HMGB2	2.56093e-84	-0.143746	-0.210638
RARB	2.73198e-84	0.0935396	0.980568
ERMN	3.05745e-84	-0.866844	-4.70622
PCBD1	3.29298e-84	-0.302799	-0.989506
SDHD	3.92609e-84	0.192635	0.35667
DDX18	4.01867e-84	-0.180572	-0.288206
GDAP1L1	4.58542e-84	-0.307191	-2.65322
ANXA11	4.71871e-84	-0.278931	-1.89943
VAT1L	5.53056e-84	-0.31546	-2.80724
SEPT10	5.71938e-84	0.197123	0.673167
WNT4	7.44881e-84	-0.480827	-2.83158
SGK3	8.30124e-84	-0.637036	-4.41521
UBALD2	8.62843e-84	-0.226303	-0.51734
TMEM238	9.22649e-84	-0.287701	-1.46822
PSMB5	1.23299e-83	-0.136138	-0.225781
GM42637	1.29422e-83	-0.51401	-3.86799
PARD3	1.40914e-83	0.2129	0.484331
SERP1	1.50894e-83	0.211008	0.39656
CCDC12	2.54431e-83	-0.184174	-0.447801
ARCN1	2.56972e-83	0.220574	0.456758
MMP2	4.29103e-83	0.185924	0.716127
FZD5	5.88575e-83	-0.465819	-2.20563
TRAPPC6A	6.46351e-83	0.231196	0.520017
ZDHHC20	6.53511e-83	0.231867	0.607908
COX6B2	7.42812e-83	0.196731	0.698677
PDE4D	8.54148e-83	0.0475105	1.41443
PFKL	9.85239e-83	0.193558	0.325106
LEMD1	1.23482e-82	-0.356031	-3.24477
POLG	1.47562e-82	0.282414	0.729433
GABRB3	1.56714e-82	-0.33574	-2.85887
DTX3L	1.7175e-82	-0.344019	-2.909
SLAIN1	2.54787e-82	-0.246723	-1.66842
PEG10	3.26072e-82	0.251199	0.797612
HMGN1	5.50561e-82	0.0983859	0.145216
SLC12A2	6.69332e-82	0.192231	0.721543
GTF2E2	6.76684e-82	0.185103	0.350152
ENPP3	7.55617e-82	0.0386774	1.56272
GADD45A	1.06882e-81	-0.36303	-1.49691
PFKFB3	1.38068e-81	0.135124	0.872679
PITPNM2	1.67104e-81	0.0891131	1.04462
NIT2	1.85214e-81	0.234292	0.538815
PAMR1	2.08654e-81	0.00573985	3.03163
MPZL2	2.83691e-81	-0.65913	-5.23368
RPS18	4.52899e-81	0.103454	0.149396
MMP14	5.41982e-81	0.220832	0.730136
DNPH1	5.90695e-81	-0.213136	-0.483666
ITGB8	1.09076e-80	-0.386013	-2.89654
TEAD4	1.30841e-80	0.0507386	1.24439
RSPH1	2.39091e-80	-0.335733	-2.3884
AK3	3.79246e-80	-0.246798	-1.34942
NRARP	3.98773e-80	-0.342883	-2.37545
ZFP68	4.27208e-80	0.151073	0.752492
BID	4.70023e-80	-0.234278	-1.18994
MFNG	5.60415e-80	-0.452142	-4.05604
MYL6	1.2913e-79	0.174236	0.271993
SLC29A1	1.69121e-79	-0.267404	-1.14764
KCNH2	1.87944e-79	-0.276987	-1.95015
BAIAP2L1	1.88305e-79	-0.249857	-0.99754
CRLF1	2.24888e-79	0.0355567	1.66748
DGKK	2.40679e-79	-0.371194	-2.3617
ARF1	2.6614e-79	0.148251	0.23987
CAR14	3.0412e-79	0.325978	0.602918
PTPN18	3.19882e-79	-0.396239	-2.71649
LAD1	3.37123e-79	-0.707407	-5.67765
TRPM7	3.57483e-79	0.211923	0.469411
GM26853	3.73606e-79	0.116735	0.86081
BSPRY	4.10098e-79	-0.60438	-4.74921
FRMD4A	4.3206e-79	0.187167	0.647828
PGLS	5.46148e-79	0.156435	0.261234
FERMT1	1.04546e-78	-0.963642	-7.4107
PTPRZ1	1.18024e-78	-0.313499	-1.44694
TBX20	1.18546e-78	-0.773153	-4.18762
P3H3	2.44013e-78	0.0662253	1.19768
MTAP7D3	2.47199e-78	-0.27334	-1.28147
AP1S3	2.49865e-78	-0.301565	-2.14081
TCEA3	2.94075e-78	-0.297492	-1.82501
FKBP11	3.50896e-78	-0.248795	-0.579386
STIP1	4.09537e-78	-0.15513	-0.266415
ESPN	4.31105e-78	-0.461943	-2.95587
BCAP31	4.48833e-78	0.184559	0.340597
WBP2	5.09661e-78	-0.230738	-0.731048
ANKRD9	5.13727e-78	-0.235402	-1.38653
HSP90B1	5.66029e-78	0.172873	0.271601
CAT	6.3111e-78	0.216544	0.51694
MRPL28	7.15284e-78	-0.157758	-0.24013
CTCF	8.7529e-78	-0.171882	-0.282496
SMARCD3	1.00056e-77	-0.351505	-1.59725
FAM181A	1.11287e-77	-0.613235	-4.70679
PLP1	1.1361e-77	-0.375061	-1.38241
BUB1	1.37625e-77	0.207029	0.39476
FGFR1	1.39138e-77	-0.25915	-0.505652
GXYLT1	1.47109e-77	0.182913	0.598202
CCDC42	2.30497e-77	0.00631193	2.84436
SMIM10L2A	3.09694e-77	-0.273355	-2.1045
NMNAT2	3.09744e-77	-0.324942	-2.94458
LRMP	3.34452e-77	-0.281237	-2.36552
PLS1	3.43826e-77	-0.498623	-4.30261
HMGB1	4.88672e-77	0.111869	0.163831
LPP	5.49574e-77	0.143967	0.811714
RAMP2	5.52611e-77	0.27113	0.745185
X6430573F11RIK	5.52787e-77	0.078945
HERPUD1	6.44406e-77	0.206439	0.702426
MGST1	6.63118e-77	-0.26007	-1.09767
RRBP1	6.90946e-77	0.231521	0.396293
GNPNAT1	8.21191e-77	0.221756	0.566739
SRCIN1	9.58935e-77	-0.296202	-2.17609
DPEP1	9.84465e-77	0.00255865	3.84359
NKX1-2	9.90809e-77	-1.0095	-5.38029
ARMC10	9.91721e-77	-0.230348	-0.63592
LLGL2	1.01436e-76	-0.283173	-1.65505
GPR162	1.02597e-76	-0.301935	-2.65687
POU2F2	1.04538e-76	-0.37944	-3.19576
CDK14	1.1514e-76	0.160101	0.666347
FLRT1	1.81777e-76	-0.543574	-3.43764
RNF7	1.85623e-76	0.145998	0.261895
LHX1	1.97471e-76	-0.560754	-2.97094
SHISA8	2.12004e-76	-0.284321	-2.29267
DNMT3L	2.71536e-76	0.0103815	2.47014
EPB41L5	2.93758e-76	-0.246674	-0.758823
MAP3K1	3.60097e-76	0.188406	0.672356
PROM1	3.68494e-76	-0.253638	-0.808124
TELO2	4.21092e-76	0.225864	0.540715
MAN1A2	5.17828e-76	0.216864	0.438038
SEMA3A	6.87336e-76	0.0749484	1.11636
ENAH	7.5331e-76	0.205348	0.372504
HOXB3	8.16014e-76	-0.532739	-4.26351
A730017C20RIK	8.70512e-76	-0.365915	-2.88659
COX17	1.22339e-75	-0.221667	-0.591949
RPL13-PS3	1.24495e-75	0.168127	0.284851
AKAP5	1.60178e-75	-0.395451	-2.58721
CYP26A1	1.62345e-75	0.121511	0.542057
DEPDC1A	2.27994e-75	0.196554	0.596734
UBN1	2.44572e-75	0.202405	0.497688
ASH1L	2.44887e-75	0.210532	0.48715
TYRO3	2.60475e-75	-0.244971	-0.966924
NDUFB7	2.96097e-75	-0.146084	-0.257655
DDX39	2.99672e-75	-0.164523	-0.267069
LSAMP	3.10005e-75	0.0651537	1.21602
ADGRG1	3.18789e-75	-0.473561	-4.60592
MAP2K1	3.48183e-75	0.19374	0.418992
NABP2	3.82413e-75	-0.183101	-0.429729
TRH	3.98219e-75	-0.789869	-3.35848
PLPPR1	5.0775e-75	-0.393436	-3.60376
TMEM65	5.24119e-75	0.14223	0.743267
TEAD3	5.55451e-75	0.0487483	1.28337
NDFIP2	6.75994e-75	0.22113	0.53433
CORO2B	7.51646e-75	-0.281205	-2.4704
SNX18	1.15799e-74	0.197788	0.580934
METTL26	1.34403e-74	-0.221562	-0.623272
BTG1	1.63692e-74	0.247196	0.62752
USP51	1.8934e-74	-0.267546	-1.00457
ILK	1.91277e-74	0.231334	0.50189
ZFP516	1.95038e-74	0.215587	0.604169
GM10036	1.95952e-74	0.192844	0.350725
NKX2-5	2.30794e-74	-0.739676	-3.02508
ATP8A1	2.37733e-74	-0.274254	-2.00984
DACT2	3.17761e-74	-0.307662	-2.14829
CTNNAL1	3.51025e-74	-0.232974	-0.720889
H2-KE6	3.90306e-74	-0.244506	-0.79444
ARMCX2	4.049e-74	0.210494	0.448148
ETV1	4.26609e-74	0.0765116	1.13292
SEPT7	4.65093e-74	0.165141	0.280758
PPP1R16B	5.53148e-74	-0.359433	-2.96027
MINOS1	5.59669e-74	0.151952	0.270501
CELF2	6.08809e-74	-0.290161	-0.879839
PLSCR1	6.82536e-74	0.181219	0.593225
SH3GL3	7.12123e-74	-0.290036	-2.05822
X1600027J07RIK	7.18953e-74	0.00269116
ARAP3	8.10206e-74	-0.355458	-2.75309
RPLP1	1.31546e-73	-0.121579	-0.18018
FRRS1L	1.78217e-73	-0.364738	-3.29116
MMP15	1.86057e-73	-0.236984	-1.20222
PSMC4	2.0408e-73	-0.146271	-0.275318
X2610037D02RIK	2.51103e-73	0.191715
FAM213B	2.94261e-73	0.170264	0.600167
RP23-80P5-1	3.00123e-73	0.00173259
PMAIP1	3.28272e-73	-0.303408	-2.4176
GREB1	3.43001e-73	-0.236368	-0.616648
COMMD3	5.33803e-73	0.263192	0.563563
PRKCE	5.35938e-73	0.0989872	0.941561
ADGRA2	5.93455e-73	0.0643033	0.843296
MCF2L	6.63637e-73	-0.283705	-2.45421
TUNAR	1.28645e-72	-0.265741	-2.11927
THEM6	1.48879e-72	-0.23335	-1.68697
DOCK4	1.7193e-72	0.064801	1.10159
GOLT1B	1.93355e-72	0.215687	0.497212
GM9844	2.8456e-72	0.258128	0.455238
NHP2	3.07521e-72	-0.156606	-0.234242
TSPAN3	3.15333e-72	0.172751	0.320173
KDELR1	3.24342e-72	0.211693	0.414893
PTGDS	3.53705e-72	-0.432259	-2.50949
DKK3	3.59326e-72	0.0180024	1.90897
CCNB1IP1	3.76786e-72	-0.486617	-3.98639
X2310022B05RIK	4.08614e-72	0.182271
CEBPB	5.50133e-72	0.075018	1.04484
PGK1-RS7	5.53566e-72	0.11629	0.798074
KIF5A	5.71249e-72	-0.258308	-2.03077
CTNND2	6.50512e-72	-0.311051	-2.90394
HELLS	6.56177e-72	-0.21909	-0.364628
LRRC8D	7.01681e-72	-0.226244	-1.22189
DNASE2A	7.95759e-72	-0.2816	-2.30647
TMEM37	8.13055e-72	-0.302996	-1.4498
CPN1	8.49996e-72	-1.00195	-5.90534
BRSK2	1.16981e-71	-0.398532	-3.60127
CLIC6	1.25374e-71	-0.633632	-3.75084
CCDC112	1.59043e-71	-0.244294	-0.826666
MRPL11	1.59498e-71	-0.140029	-0.236983
ARPP19	1.75248e-71	-0.137991	-0.21602
SUB1	2.77372e-71	0.120741	0.181473
TRAF4	3.01101e-71	0.248848	0.484816
PLCG2	3.23941e-71	-0.300392	-2.1181
SAR1A	3.63676e-71	0.175996	0.352513
S100A16	3.6425e-71	-0.480494	-3.63462
SRPX2	4.8025e-71	0.00731522	2.60394
EPHA7	4.81064e-71	-0.34708	-1.33839
PAWR	4.8159e-71	-0.242788	-0.840098
ANXA4	5.12817e-71	-0.303638	-2.26417
PHF10	5.24951e-71	0.183757	0.377456
EDNRB	5.43503e-71	-0.440083	-3.44375
HAND1	5.44979e-71	-1.16334	-4.62815
FAM84B	8.82325e-71	-0.266934	-1.8502
PGAP1	9.18015e-71	-0.244439	-1.24506
SAMD10	9.74315e-71	-0.245397	-2.10934
FERD3L	1.03623e-70	0.00613195	2.65193
TMEM54	1.06159e-70	-0.595266	-4.18331
FGD2	1.33238e-70	-0.518898	-4.32913
CBX8	1.43715e-70	0.0688804	1.04769
COX5A	1.54102e-70	-0.123747	-0.19399
EFEMP2	1.61488e-70	0.127021	0.827467
TMEM82	2.088e-70	-0.271798	-2.02082
FNDC3B	2.0967e-70	0.156225	0.801031
COL27A1	2.43691e-70	0.0830882	1.07439
PCSK2	3.90738e-70	-0.504279	-4.27096
MKL2	4.76815e-70	0.10989	0.822927
FAM96A	5.31492e-70	0.198884	0.387274
PGPEP1L	5.34396e-70	0.00756525	2.67274
SYNPO	5.46254e-70	0.013847	2.19339
UTP11L	5.60301e-70	0.170219	0.32204
DNAJC25	6.15776e-70	0.179718	0.613232
SACM1L	6.2896e-70	0.15422	0.685784
PARD6B	6.37484e-70	-0.236422	-1.28866
FRZB	6.8815e-70	0.136454	0.846414
FNDC3A	8.91468e-70	0.212286	0.492205
CITED1	9.49966e-70	0.14791	0.394086
TRMT6	1.04911e-69	-0.182022	-0.382379
FLYWCH2	1.06342e-69	-0.22607	-1.06992
RAB38	1.12397e-69	-0.268516	-2.23926
GFRA3	1.31855e-69	-0.616654	-5.05108
MYCL	1.39441e-69	-0.277427	-1.10616
KLF9	1.60032e-69	-0.246098	-1.29681
SLC25A36	1.72441e-69	0.193229	0.576834
GABRA4	2.26722e-69	-0.287147	-2.56507
AI314180	2.91647e-69	0.204275	0.455599
FAM149A	2.92829e-69	0.0706766	1.02145
POP5	3.25322e-69	-0.175285	-0.329072
CCND2	4.88831e-69	0.476124	0.578941
PDLIM7	5.11525e-69	0.257602	0.51388
VIM	5.78413e-69	0.455897	0.646915
RCBTB2	6.04567e-69	0.186732	0.374245
PRMT8	6.04997e-69	-0.43002	-4.33705
MFGE8	6.10342e-69	0.207266	0.671568
CHMP4C	6.14555e-69	-0.335283	-3.28079
DOK4	7.15786e-69	-0.388594	-2.20372
SPG21	9.69646e-69	0.181323	0.464735
GNGT2	9.91963e-69	-0.290194	-1.7714
PRR36	1.07859e-68	-0.282176	-2.52884
SEC11C	1.32402e-68	0.167513	0.610968
EPHX2	1.38043e-68	-0.442835	-3.72734
HIST1H3E	1.42047e-68	-0.252265	-0.786845
PCDH8	1.48452e-68	-0.498644	-3.03965
KANK1	1.66888e-68	-0.229638	-0.944457
T	1.66888e-68	-0.997065	-4.49209
SMAD2	2.08654e-68	0.196367	0.492249
RGS17	2.52383e-68	-0.26217	-2.07105
CRABP1	3.1544e-68	0.594149	0.702872
PBX4	4.54187e-68	-0.232288	-1.71576
CMTM3	4.83859e-68	0.131032	0.832203
CNR1	4.87884e-68	0.0204013	1.82424
FOXO1	9.18241e-68	0.111886	0.87569
POLD3	1.00299e-67	-0.189396	-0.455296
SCN8A	1.0733e-67	-0.215709	-1.26427
CDC16	1.09494e-67	0.181783	0.365822
JAM3	1.27578e-67	0.244106	0.475802
SOX17	1.51411e-67	-0.840947	-4.40499
AMOTL2	1.68318e-67	0.193329	0.520443
FOSB	1.78384e-67	-0.630898	-4.17286
PATJ	1.78428e-67	-0.251499	-1.78757
ATOX1	2.19138e-67	-0.1487	-0.227478
PAX8	2.22933e-67	-0.717433	-3.98422
DNAJA1	2.49052e-67	-0.113259	-0.171262
MCC	2.60146e-67	0.115286	0.685505
RAB3B	2.66355e-67	-0.257584	-2.22716
X1700023F06RIK	3.44134e-67	-0.458045
CACNG8	4.023e-67	-0.297336	-2.81096
PALM3	4.48973e-67	-0.31374	-1.76492
RPS17	5.14154e-67	-0.0819806	-0.119815
AIG1	5.77325e-67	-0.213738	-0.668295
ENO1	6.25256e-67	0.151803	0.225439
IER5L	6.43251e-67	0.275242	0.554733
PAK1IP1	8.25474e-67	-0.165454	-0.342942
SPON1	9.18552e-67	-0.29508	-1.18992
ACSL4	9.58849e-67	-0.225587	-0.902816
PTPRE	1.25618e-66	-0.400677	-2.76234
TFAP2B	1.61372e-66	-0.721293	-3.38233
FKBP14	1.89832e-66	0.0837093	0.958566
SMIM14	1.9992e-66	-0.23673	-0.810586
ASTN1	2.16546e-66	-0.264618	-2.40656
RGS3	2.54544e-66	0.110447	0.911157
PCDH7	2.56211e-66	0.112127	0.651868
ECHS1	3.25975e-66	0.177716	0.346349
BC028528	3.2627e-66	0.0655197	1.07826
MGAT3	3.60584e-66	0.0426769	1.25985
STMN1	3.97918e-66	0.15783	0.246978
FABP3	4.74764e-66	-0.2445	-1.99948
ZMAT2	5.46718e-66	-0.142683	-0.234077
RPL36A	5.63658e-66	-0.0896823	-0.12982
TFAP2C	5.68283e-66	-0.433017	-3.1854
YWHAB	6.55366e-66	0.134573	0.224206
ZFP397	7.96843e-66	0.190347	0.554729
BMP2	8.29819e-66	-0.445509	-2.4956
SLC16A10	8.34508e-66	0.0361368	1.43649
EPHA1	8.79117e-66	-0.280805	-2.23694
OLFM1	1.09646e-65	-0.22516	-0.728221
SOD1	1.22315e-65	-0.204077	-0.479677
OLFML3	1.2548e-65	0.0663992	1.06153
TGFB3	1.64804e-65	0.0110944	2.29822
MYL2	1.94582e-65	-0.494918	-3.36154
CNEP1R1	1.95037e-65	0.188922	0.47285
SH3PXD2A	2.55136e-65	0.106933	0.858358
LGALS1	3.0487e-65	0.241024	0.557782
FNBP1L	3.10752e-65	-0.191974	-0.44023
FAM98C	3.22705e-65	-0.209683	-0.835766
GDPD1	3.93239e-65	-0.220328	-1.11828
UQCC2	4.65112e-65	0.13919	0.233218
ACSL6	5.14278e-65	-0.241555	-2.32665
SVIP	5.50271e-65	-0.316687	-3.44483
HCFC1R1	6.03283e-65	-0.232671	-0.73303
MAP4K5	6.05706e-65	0.145084	0.651291
CLPTM1L	7.15794e-65	0.212309	0.520362
FKBP8	7.17708e-65	-0.159882	-0.350657
EID2	7.42701e-65	0.199394	0.429858
IFI204	8.57627e-65	-0.377595	-2.61107
RAX	8.83535e-65	-0.459896	-2.40152
MFSD13A	9.40978e-65	-0.215592	-1.67075
ZFP61	1.26141e-64	0.10115	0.831041
HDDC3	1.46357e-64	0.137905	0.626848
DNAJC10	1.6175e-64	0.188003	0.389027
PLEC	1.67804e-64	-0.232196	-1.01789
AQP11	1.84678e-64	-0.254093	-1.5442
CABP7	2.11657e-64		-25.4422
CHPT1	2.21003e-64	0.159991	0.679785
FAM187B	2.75354e-64	-0.255952	-2.43613
GRTP1	2.84735e-64	-0.217831	-1.06197
CD47	2.95635e-64	0.217883	0.638718
ARHGEF5	3.40718e-64	-0.303217	-2.49826
KALRN	3.47989e-64	0.0823563	0.975855
CRB2	3.57387e-64	-0.226164	-1.18371
SEMA3E	3.60888e-64	-0.382539	-3.10471
FOXK1	3.80977e-64	0.0830381	0.859544
NPTN	4.59008e-64	0.206251	0.502364
EFNB3	4.8961e-64	0.145728	0.746416
EMC10	5.10465e-64	-0.160647	-0.331912
MT-ND3	5.33011e-64	-0.153355	-0.207133
BTBD1	6.07406e-64	0.185107	0.381654
ANK2	6.53827e-64	-0.245934	-0.751744
PRKAR1A	7.04815e-64	0.167875	0.317851
SHTN1	8.2039e-64	-0.466534	-4.01995
PHF5A	8.26745e-64	-0.122612	-0.172174
TMEM55A	8.27771e-64	0.219723	0.523932
MTUS1	8.46386e-64	-0.332654	-2.76347
COPA	9.20827e-64	0.172394	0.397924
CCDC102A	9.39727e-64	0.127686	0.740865
SNRNP25	9.39842e-64	-0.165014	-0.324829
RPL9	9.76003e-64	0.0842101	0.121547
FBXO32	1.05792e-63	-0.324876	-2.60167
PAK3	1.20062e-63	-0.285789	-1.74718
ROBO3	1.2103e-63	-0.638356	-5.02666
ZFP710	1.29238e-63	-0.22956	-0.789216
FAM19A5	1.52703e-63	-0.222037	-0.64954
WIPF1	1.81238e-63	0.0848852	0.844921
EIF1B	1.96769e-63	0.160452	0.280856
NADK2	2.39442e-63	0.191215	0.504926
BMPER	2.48632e-63	-0.4871	-3.81315
MT2	2.50202e-63	-0.365073	-1.84623
RAB6B	3.06227e-63	-0.226711	-1.82649
BACH2	3.18942e-63	0.0975968	0.895513
PHACTR2	3.22187e-63	0.127192	0.780873
TSPAN5	3.22557e-63	-0.223732	-0.657224
ZCCHC24	3.36936e-63	0.0766875	0.994889
RAI14	3.89902e-63	0.17793	0.662127
CACNA1B	4.74321e-63	-0.261588	-2.33554
RPLP2	4.88974e-63	-0.0747098	-0.108703
COX5B	5.03817e-63	-0.125485	-0.199852
TRIO	5.44708e-63	0.171682	0.629381
IRS4	5.46049e-63	-0.357914	-1.29599
BLNK	6.64424e-63	-0.298641	-3.30823
CUEDC2	7.4535e-63	-0.181153	-0.396096
RAB18	7.49841e-63	0.172544	0.341728
ZNHIT1	7.84196e-63	-0.179122	-0.46509
RRAGD	8.67545e-63	-0.218571	-0.475436
GATM	8.8239e-63	-0.207718	-1.51045
PNRC1	9.20807e-63	0.224428	0.418685
POLR2D	9.51093e-63	0.165397	0.314702
LRRC4	9.95371e-63	-0.23991	-2.21793
SPCS1	1.07178e-62	0.156642	0.295438
FOXL2	1.08424e-62	0.00150523	4.0706
TBC1D24	1.08446e-62	0.0946535	0.846602
COPB2	1.13151e-62	0.16559	0.306894
WDR76	1.18887e-62	-0.222946	-0.597454
ARHGAP31	1.21096e-62	0.0574322	0.306748
TDRD7	1.2409e-62	-0.263403	-2.35172
MSRB3	1.28286e-62	0.0293335	1.47605
PAG1	1.36039e-62	0.0341319	1.43108
USH1C	1.38545e-62	-0.205145	-1.33471
RHOBTB3	1.49159e-62	0.209035	0.390259
NDRG1	2.05894e-62	0.0340955	1.50539
CEP170	2.31854e-62	0.192512	0.54097
MYCBP2	2.43908e-62	0.201379	0.410065
TUBA1C	2.65285e-62	-0.221715	-0.57242
CRTAP	2.75667e-62	0.147675	0.711469
ZC3H7A	3.00455e-62	0.126479	0.714769
LRRN1	3.43667e-62	-0.228798	-1.7463
CXCR4	3.49276e-62	-0.228513	-1.38159
AW551984	4.02824e-62	0.0173354	1.87521
LPAR4	4.10751e-62	-0.245839	-0.630336
FRRS1	4.19227e-62	-0.21557	-0.911777
CCDC6	4.38845e-62	0.172791	0.54358
GNG12	4.63087e-62	0.153479	0.753698
AFF3	4.68836e-62	0.10146	0.803337
SLMO1	5.52492e-62	-0.212483	-1.13759
SOX10	5.64608e-62	-0.528382	-3.07895
CGNL1	6.19839e-62	-0.258656	-1.07471
ZWINT	6.26939e-62	0.173361	0.324602
MLF1	6.61636e-62	-0.222799	-0.858865
PODXL2	7.36807e-62	0.0755944	0.968561
HAPLN3	8.92067e-62	0.0772934	1.0649
TIA1	9.09853e-62	0.184214	0.356848
PNPLA2	9.51768e-62	-0.196846	-1.23002
DOPEY2	9.54463e-62	0.0322269	1.3363
DEDD2	1.0649e-61	-0.199437	-1.44129
RP23-291B1-2	1.29134e-61	0.00523067
SLC13A4	1.34969e-61	-0.376585	-2.37716
ATP6V1B2	1.50432e-61	-0.200893	-0.515523
NUMA1	1.79277e-61	0.240585	0.49436
RUNX1T1	1.94092e-61	0.0885313	0.878486
IGLON5	2.25188e-61	-0.205284	-1.67972
BAG4	2.2799e-61	-0.194423	-0.500204
USP11	2.59029e-61	0.115925	0.72086
ERP29	2.64269e-61	0.160075	0.283369
LGI2	2.64269e-61	-0.224167	-1.14319
RTN4RL1	3.19742e-61	-0.486553	-4.83975
SIN3B	3.9887e-61	0.169041	0.341799
LFNG	4.07947e-61	-0.238502	-1.38099
GM26719	4.23198e-61	0.00111553	4.61732
ADPGK	4.27641e-61	0.166591	0.540003
DCBLD2	4.5796e-61	0.148857	0.545646
CIB1	5.01308e-61	-0.199961	-0.53701
GRB10	5.98589e-61	0.221375	0.384157
ECHDC2	7.21387e-61	-0.210012	-0.88109
BZW2	7.36489e-61	0.147063	0.261513
HNF1B	1.04738e-60	-1.01256	-6.58708
KNOP1	1.15212e-60	-0.144305	-0.245902
HNRNPK	1.17528e-60	0.111813	0.166883
PAX7	1.22939e-60	-0.337556	-2.48698
CPNE8	1.32269e-60	0.0386333	1.38424
MAPK4	1.37705e-60	-0.305298	-3.14365
VAT1	1.48757e-60	-0.223447	-1.14051
CBFB	1.91784e-60	0.181919	0.49727
X2200002D01RIK	2.07103e-60	-0.230796
TMED9	2.20602e-60	0.149159	0.25981
SRF	2.2371e-60	0.144504	0.541873
PRPS2	2.38707e-60	-0.210057	-0.668324
ZFP57	2.4488e-60	0.0918536	0.856502
CCDC92	2.49359e-60	-0.195634	-1.45921
ARL1	2.7077e-60	0.148066	0.273721
FSD1	3.59837e-60	-0.20728	-0.723274
EBP	3.83854e-60	-0.202128	-0.594446
P3H4	4.07239e-60	0.139485	0.671648
NKAP	4.10016e-60	-0.183221	-0.484126
MAF	4.36445e-60	-0.372992	-1.7172
PCDHGC3	4.6588e-60	0.0202851	1.68836
SCRN1	5.54122e-60	-0.283084	-2.62198
FOXP4	5.72384e-60	0.187003	0.571315
CCT2	5.83108e-60	-0.110251	-0.169274
DUSP27	6.8406e-60	0.0276242	1.30356
X2610528J11RIK	7.01349e-60	-1.25813
ARHGEF15	7.44115e-60	-0.314058	-2.69573
SPPL2A	7.91911e-60	0.150437	0.650233
MIF4GD	8.07378e-60	-0.198782	-0.892857
ZKSCAN3	8.89257e-60	0.204741	0.442509
TRAP1A	1.02663e-59	-1.55634	-6.94877
ZFP422	1.06492e-59	0.219808	0.434313
TMED10	1.11467e-59	0.14468	0.256802
SLC25A33	1.32102e-59	-0.211096	-0.714127
X5930412G12RIK	1.35679e-59	0.063769
ATP5L	1.49938e-59	-0.138505	-0.200832
HADHB	1.76525e-59	0.1611	0.605517
MARVELD2	1.83727e-59	-0.384849	-3.79315
PELP1	1.85153e-59	-0.172788	-0.390631
RTN4	1.88938e-59	0.153813	0.273739
TDRKH	2.0786e-59	-0.211783	-1.17172
GSR	2.23597e-59	-0.201779	-0.536812
POLR2E	2.68555e-59	0.12659	0.212999
MARF1	2.87019e-59	0.127378	0.654205
AKR1B3	2.88205e-59	-0.17914	-0.332551
FNDC4	2.95736e-59	0.175779	0.50394
PSMD13	3.0753e-59	-0.131218	-0.254093
PTPRN	4.081e-59	-0.345776	-3.66362
PLXNA2	4.70243e-59	-0.251787	-0.98884
RAPGEF5	5.00182e-59	-0.223906	-1.67215
PTPRS	5.15897e-59	0.188895	0.462827
LYPD1	5.45526e-59	0.0291368	1.50531
SCN1A	5.78651e-59	0.0132179	2.10087
SEMA4D	5.94913e-59	-0.204253	-1.85749
MAD2L2	6.51951e-59	-0.193026	-0.775377
ULK2	7.10719e-59	0.0722163	0.953197
ACOT13	7.45476e-59	-0.204783	-0.671819
FOXO4	7.47339e-59	-0.220881	-1.10476
PRRC1	7.49432e-59	0.156841	0.628096
SLC7A7	8.90178e-59	-0.345002	-2.68128
MOB3A	9.33753e-59	0.0790861	0.841094
RGMA	9.72465e-59	-0.14227	-0.413545
MEOX2	1.11108e-58	0.00512692	2.91539
TCF21	1.54705e-58	0.0684504	1.35131
TST	1.58071e-58	-0.197936	-0.945796
SFRP2	1.6424e-58	-0.214394	-0.598219
SEC31A	1.65882e-58	0.190974	0.403148
GSTA4	2.37239e-58	-0.206306	-0.384917
NRK	2.55786e-58	-0.494739	-3.37215
MOGS	2.75237e-58	0.192174	0.432189
CH25H	2.82373e-58	0.0089073	2.63902
PLEKHO2	3.31932e-58	0.0334444	1.32227
GBX2	3.3631e-58	-0.302295	-1.34033
TCF3	4.12603e-58	0.167594	0.317963
RPL6L	4.77952e-58	0.15034	0.2671
JDP2	4.77952e-58	0.0502653	0.79383
CBX3	4.79255e-58	0.154068	0.251906
NDUFA12	6.04039e-58	-0.159864	-0.258852
KCNB1	6.25329e-58	-0.327863	-3.48391
EMID1	7.00344e-58	-0.206498	-1.525
ELMO1	7.13685e-58	0.12111	0.7429
PDIA6	7.30634e-58	0.143602	0.217494
DNAJA2	7.33161e-58	0.147004	0.255197
LDHC	8.21713e-58	-0.542748	-5.68599
PDHA1	8.59107e-58	-0.184048	-0.390277
CABLES1	8.70421e-58	0.0864939	0.805548
NKX2-9	1.23983e-57	-0.711728	-3.62488
GPRC5C	1.34182e-57	0.208926	0.621042
UBE2QL1	1.61622e-57	-0.358069	-3.43082
SLC45A3	1.66698e-57	-0.28569	-3.25776
FLRT3	1.68084e-57	0.266312	0.63113
FRMD6	1.68769e-57	0.141602	0.651126
PIFO	2.4394e-57	-0.952081	-5.76325
MVB12B	2.74268e-57	-0.198107	-0.84809
PEX11A	2.96085e-57	-0.1729	-1.15541
SEZ6	3.40457e-57	-0.390991	-4.16533
CDCA7L	3.67269e-57	-0.200444	-0.549131
HTRA2	3.87584e-57	0.217386	0.490048
ATRAID	4.1599e-57	0.188994	0.473487
RCSD1	4.33481e-57	0.0606017	0.347368
SAPCD2	4.37243e-57	-0.217468	-0.824177
TTC1	4.85365e-57	-0.162191	-0.386242
X1010001N08RIK	5.11745e-57	-0.676637
SEPT4	5.25168e-57	-0.234139	-2.15628
SP9	5.42031e-57	-0.408023	-3.63334
WDR83OS	5.48589e-57	0.17105	0.340945
SF3B2	5.58504e-57	-0.124802	-0.208835
SLC7A5	5.58842e-57	-0.185813	-1.35015
SELENON	7.38322e-57	0.158922	0.562493
ANTXR2	7.74996e-57	0.0567927	1.04155
ZFP703	8.09574e-57	-0.22764	-1.01067
AI661453	8.72351e-57	-0.525964	-5.66309
WNT1	1.04721e-56	-0.591837	-3.28029
FGF5	1.04889e-56	-0.480692	-4.10681
PTPN6	1.15151e-56	-0.194051	-1.43806
BRI3BP	1.25358e-56	0.183725	0.379246
DCTPP1	1.35679e-56	-0.141817	-0.197578
PCSK9	1.94732e-56	-0.335786	-3.41397
SLC50A1	2.7938e-56	0.142495	0.609295
CMPK1	3.25584e-56	0.165747	0.326101
MSX1	3.43719e-56	0.174604	0.882764
MTHFD2L	3.5469e-56	0.220226	0.488396
LYSMD2	3.61831e-56	0.140329	0.610103
CDCA7	3.67975e-56	-0.185566	-0.334736
NANOG	3.95012e-56	-0.38275	-3.58832
SEPT9	4.18963e-56	0.203524	0.429095
KCNC3	4.32662e-56	-0.195486	-1.15047
HPN	4.67053e-56	-0.313802	-3.03763
SEL1L3	6.07705e-56	-0.312747	-2.69315
RNF165	6.79622e-56	-0.22571	-0.678157
BBX	7.51835e-56	0.200093	0.379299
TLE1	7.75585e-56	0.153317	0.483522
TUBE1	7.90489e-56	0.124358	0.640777
ST8SIA6	8.63124e-56	0.00412319	3.11375
TNS4	9.17564e-56	0.00666791	2.56815
PKP2	9.62365e-56	-0.235951	-1.16748
MRPL50	9.66793e-56	0.180325	0.362633
CDCA8	9.95378e-56	-0.163068	-0.2782
X2010107G23RIK	1.05609e-55	-0.190473
FAM83G	1.0588e-55	-0.21208	-2.14814
NAALAD2	1.20638e-55	0.0134686	1.97385
VAV3	1.22746e-55	-0.25119	-2.13649
NDUFA2	1.58352e-55	-0.119952	-0.182242
SWI5	1.61509e-55	0.1035	0.172419
SLC25A24	1.62539e-55	0.131511	0.670325
GABARAPL1	1.70441e-55	-0.211903	-0.870736
SOX5	1.74835e-55	0.101307	0.843389
TESC	1.8107e-55	-0.323069	-3.45928
RGL1	1.9439e-55	0.122833	0.721747
AIDA	1.98535e-55	0.176451	0.47886
TGFBR2	2.1847e-55	0.0320391	1.47834
CPM	2.40203e-55	-0.47669	-3.07649
CCNI	2.51958e-55	0.177365	0.338456
COPS2	2.95537e-55	0.152386	0.29485
FAM178B	3.15941e-55	-0.194609	-1.65337
LCK	3.20948e-55	-0.181195	-1.49667
ZFYVE16	3.25028e-55	0.124944	0.655214
FZD8	3.27339e-55	-0.220247	-1.26595
CACNA2D2	3.35658e-55	-0.260325	-2.78451
FBLN2	3.48394e-55	-0.236694	-1.51016
DSC2	3.515e-55	-0.331718	-3.42294
TMEM38B	3.70168e-55	-0.200818	-1.01119
SRRM4	3.80009e-55	-0.356368	-3.57348
TSHZ1	3.82457e-55	-0.229345	-1.17279
LGR4	4.30483e-55	0.131926	0.739084
SMAD7	4.80632e-55	0.137875	0.630155
PLAT	5.38734e-55	0.0881327	0.800329
HIST1H4D	5.81732e-55	-0.264307	-0.635216
DLX5	5.84119e-55	-0.41526	-2.84408
DBN1	6.10505e-55	0.223618	0.39486
PDZRN3	6.78687e-55	0.111501	0.803518
LAMTOR5	7.25449e-55	-0.134056	-0.22289
X1190007I07RIK	7.26213e-55	-0.192771
ACADSB	7.54234e-55	0.111903	0.651051
TMIGD3	1.13285e-54	0.00442083	2.97554
FGFRL1	1.14571e-54	0.119873	0.723296
FOLR1	1.26848e-54	-0.737618	-4.38101
HERC3	1.28649e-54	-0.20203	-1.97877
CHORDC1	1.46246e-54	-0.152761	-0.312129
UQCR10	1.53699e-54	-0.124195	-0.189099
ABCC4	1.53699e-54	-0.225921	-2.21127
CLDN9	1.58572e-54	-0.593713	-4.6301
ELK3	1.77214e-54	0.0727232	0.520464
TSPAN17	1.80838e-54	0.026238	1.03743
CYB561	1.87599e-54	-0.375569	-4.10796
IGF2BP2	1.88173e-54	0.173732	0.320934
NRM	1.92498e-54	0.18359	0.51546
ICA1	2.38104e-54	-0.192364	-1.61799
SPSB4	2.38441e-54	0.157652	0.616069
UHRF2	2.62279e-54	0.168666	0.323892
TMEM165	2.6665e-54	0.156571	0.302757
GSTT3	2.81357e-54	-0.321203	-3.51516
PERP	2.90279e-54	-0.314621	-3.03569
CDH20	2.91884e-54	-0.31578	-3.16415
TMTC3	3.31489e-54	0.115324	0.663309
CLSTN3	3.90976e-54	-0.200182	-2.024
AR	3.93354e-54	-0.218707	-2.10371
XIST	4.07814e-54	-0.267239	-0.904065
RFX7	4.0945e-54	0.175756	0.447046
MAGI1	4.23236e-54	-0.206033	-0.864191
FEZF2	4.64304e-54	-0.522171	-3.85392
DYNC1LI2	6.19871e-54	0.150403	0.455899
ARHGAP18	6.26061e-54	-0.292603	-2.78896
RRAGA	6.58788e-54	0.149419	0.284515
TMED7	8.0813e-54	0.186041	0.388596
CASP8	8.40797e-54	-0.187397	-1.14934
NEO1	8.44349e-54	0.167621	0.539949
MARCH2	8.60332e-54	-0.190665	-0.820437
DZIP3	8.89399e-54	0.178718	0.462549
DUSP5	8.92017e-54	-0.214051	-1.00468
PRR5	8.94873e-54	0.128788	0.717299
PICK1	8.96324e-54	-0.193146	-0.756897
ATP5J2	9.04009e-54	-0.100578	-0.146083
ATP5G3	9.61301e-54	0.117706	0.204543
RPL37A	1.03377e-53	-0.0946859	-0.135682
PTPRN2	1.09239e-53	-0.267701	-3.07968
PDIA3	1.09714e-53	0.150946	0.227331
RPL8	1.16605e-53	-0.0761783	-0.111709
SAE1	1.32569e-53	-0.126913	-0.197953
HEBP2	1.33322e-53	0.125879	0.67619
ALKBH5	1.41121e-53	0.177726	0.377851
EHD4	1.622e-53	-0.208055	-0.730671
SP5	2.64597e-53	0.20241	0.82607
UBL5	2.75061e-53	-0.11243	-0.18539
SYNM	2.77729e-53	-0.261802	-2.22948
CDH6	2.95275e-53	-0.240656	-2.60371
ATP6V1E1	3.26273e-53	-0.160425	-0.359863
CNTLN	3.47487e-53	0.0555298	1.06436
FCHO2	3.87039e-53	0.142806	0.584765
CENPF	4.01546e-53	-0.239546	-0.411957
NFE2L2	4.47522e-53	-0.205727	-0.656188
SDSL	4.63598e-53	-0.184638	-0.854354
SEC11A	4.65996e-53	0.130484	0.232011
EEA1	6.00042e-53	0.170449	0.625663
PABPC4	7.38721e-53	0.18948	0.374742
RALGPS1	7.71336e-53	-0.203929	-2.36186
TMEM39A	7.77339e-53	0.169362	0.520186
NEMP1	7.84625e-53	0.0863825	0.776904
YIPF5	8.03807e-53	0.173667	0.364564
GDPD2	8.80285e-53	-0.333632	-3.94821
CYC1	8.92271e-53	-0.136551	-0.236279
C1D	8.96924e-53	0.142147	0.273562
ARRB2	9.05574e-53	-0.189521	-0.756092
MGAT5B	9.54169e-53	-0.250046	-3.0662
CASD1	1.12674e-52	0.150107	0.530935
MCM7	1.16215e-52	-0.14134	-0.240136
B830012L14RIK	1.27209e-52	-0.200209	-1.49517
RPL34	1.286e-52	-0.0757764	-0.109168
SPIRE2	1.33935e-52	-0.205507	-2.17132
UBE2E3	1.5278e-52	0.136192	0.254713
PHLDB2	1.53915e-52	0.17763	0.524163
ELOVL7	1.61504e-52	-0.379459	-3.93472
PPP1R14A	1.82724e-52	0.125257	0.705684
FCHO1	1.87303e-52	-0.336265	-3.84369
PDE11A	2.39465e-52	0.0177638	1.33043
CDC34	2.66679e-52	-0.138221	-0.273515
SMIM1	2.71653e-52	-0.220834	-1.11083
SNRPD2	2.81181e-52	-0.0934346	-0.149307
RPS9	2.85319e-52	-0.0830401	-0.120691
[truncated: 9,832 more rows]

## Sheet: PhenoGraph cluster 5
gene	P-value (FDR adjusted)	MAST Hurdle	logFC
RBP1	0	1.39729	1.98408
MEIS2	0	1.38208	1.61242
CRABP2	0	1.26375	1.69559
LDHB	0	1.23101	1.6609
MKRN1	0	1.05852	1.87802
FST	0	1.01188	1.75325
DNMT3B	0	0.945109	1.41817
EZR	0	0.922687	1.41831
SALL4	0	0.907594	1.34828
STMN2	0	0.902565	2.0537
E130012A19RIK	0	0.775359	1.17619
FGFR1	0	0.774469	1.0487
SOX2	0	0.77233	0.611111
ACER2	0	0.766626	1.83291
ZMYND8	0	0.760821	1.2426
OAT	0	0.757503	1.74543
AES	0	0.715417	1.92706
METRN	0	0.695232	1.57841
PDGFA	0	0.671396	1.52318
PAK1	0	0.652856	1.93606
MRPL34	0	0.652335	1.05366
EPCAM	0	0.624053	2.45394
POU5F1	0	0.610783	3.92234
HMGN5	0	0.593442	1.00569
SOX3	0	0.589923	2.28948
AKAP12	0	0.581309	1.67438
RGMA	0	0.571518	1.3466
PCSK1N	0	0.559489	1.30516
HELLS	0	0.539677	0.852013
DST	0	0.527773	1.37927
RASGRP2	0	0.476074	1.7646
CHCHD10	0	0.467489	2.28964
SSSCA1	0	0.449538	0.750706
CNTFR	0	0.444404	1.58002
CBY1	0	0.442429	0.964974
ZIC3	0	0.422412	2.1087
NDUFA12	0	0.406013	0.683161
CKB	0	0.401436	1.84517
X1810022K09RIK	0	0.400733
OXCT1	0	0.389854	1.81614
CXX1A	0	0.383095	1.38401
GPX4	0	0.369498	0.578867
ERAS	0	0.364851	1.93539
DEK	0	0.360156	0.55145
MDK	0	0.356498	0.533485
FOXB1	0	0.35646	1.25216
HOXB2	0	0.3514	1.74171
CXX1B	0	0.343557	1.66758
PIM2	0	0.343305	2.71169
ECI1	0	0.339528	1.56189
UPP1	0	0.325054	3.44136
SKAP2	0	0.31419	1.88244
LHPP	0	0.309642	2.45489
PHLDA3	0	0.307639	2.5342
HES3	0	0.295129	3.13741
ZFP703	0	0.290275	3.14863
COX7C	0	0.28582	0.419062
BST2	0	0.270831	2.13818
HOXB1	0	0.269908	2.74991
HOXA1	0	0.246691	4.60356
GBX2	0	0.238725	3.33759
CDH1	0	0.231589	1.96533
TSHZ1	0	0.220538	2.40354
RPL31	0	0.217208	0.321544
TMEM238	0	0.192815	2.03877
ALPL	0	0.185172	2.78279
GRB7	0	0.183769	1.79132
CXCL12	0	0.183353	2.89102
APELA	0	0.183043	2.11343
KLF9	0	0.179337	1.76823
HSPB1	0	0.172863	2.04671
L1TD1	0	0.166921	1.81463
CDX1	0	0.162902	4.56327
FABP7	0	0.162348	1.73858
GM11627	0	0.131329	2.26728
FGFBP3	0	0.128355	3.09968
KCNH2	0	0.111061	2.20782
SH3GL3	0	0.101862	2.01753
SLC7A3	0	0.100433	3.00845
DACT2	0	0.100198	2.55986
PORCN	0	0.0988148	2.48593
CDKN1A	0	0.0953651	2.31304
X1700019D03RIK	0	0.094601
EPHA1	0	0.0883276	2.52624
X2900011O08RIK	0	0.085743
CDX2	0	0.0830715	4.31658
VRTN	0	0.0811308	2.16892
B3GNT7	0	0.0790592	2.52755
WNT8A	0	0.0700007	5.30304
SEMA3E	0	0.061412	2.87794
NTRK2	0	0.055114	2.92754
PLPPR1	0	0.0521674	3.12945
EPHX2	0	0.0466674	2.83593
CCNB1IP1	0	0.0455661	2.7067
NANOG	0	0.0412467	2.7759
HNF1B	0	0.0345302	3.7946
NKX1-2	0	0.0342535	5.46598
OLIG3	0	0.0317556	3.56828
PPL	0	0.0187019	3.41658
GABRG1	0	0.0135314	4.43323
GM6792	0	0.00338422	5.97999
DDAH2	0	-0.538837	-1.02633
NDN	0	-0.554743	-1.18197
H2AFY	0	-0.556476	-0.925615
SERPINH1	0	-0.615619	-1.0016
PALLD	0	-0.687017	-1.97359
GPC3	0	-0.738298	-1.3749
ID1	0	-0.888643	-1.68988
SLC25A4	0	-0.904759	-1.43534
CDH11	0	-0.907893	-2.73809
PHLDA1	0	-0.928229	-2.35299
FBN2	0	-1.02988	-3.49904
PRRX2	0	-1.21344	-2.99927
OTX2	0	-1.40962	-3.55895
MEST	0	-1.43856	-2.40216
NR2F2	0	-1.50195	-5.48165
TWIST1	0	-1.56046	-3.35902
NR2F1	0	-1.59007	-4.07289
SERF1	1.94527e-305	-0.493443	-1.10728
GRSF1	7.70341e-304	0.405071	0.861814
GNG3	7.16376e-301	0.288255	1.46521
USP3	2.29752e-300	0.484299	0.920994
FN1	4.10516e-300	-0.794296	-1.56933
LPAR4	2.50249e-299	0.58536	1.28733
KYNU	4.86724e-296	0.02576	3.06573
H19	4.89238e-296	-0.908349	-1.85923
SHISA2	2.4724e-294	-0.973693	-2.96458
PLPP4	5.04399e-293	0.013334	3.47246
ATP5L	2.52892e-292	0.314403	0.512271
HPRT	2.93913e-292	0.585776	0.971653
EBP	4.17029e-289	0.388528	1.11057
HMGA2	2.33464e-287	-0.499854	-0.758354
MTAP7D3	1.18621e-286	0.213303	1.59278
PARP1	2.22086e-286	0.393841	0.692
SPON1	2.99041e-286	-0.841905	-3.41609
VGLL4	8.40969e-285	-0.529606	-1.59854
WFDC2	1.92597e-282	0.534375	1.27002
APOC1	1.98366e-279	0.158204	1.48596
JAM3	7.48032e-278	-0.427913	-1.04875
IGFBP4	2.76886e-277	-0.647451	-1.35859
MRPL42	1.35533e-276	0.316323	0.546583
ECHDC2	4.16675e-275	0.249454	1.37033
RAB25	2.51643e-274	0.133623	0.938266
NRP2	3.81728e-274	-0.804925	-2.08981
PLA2G7	4.04126e-274	0.163234	1.66248
DDIT4	1.52275e-271	0.526625	1.29197
PHOX2A	1.7463e-269	0.0796934	2.23824
BAMBI	1.12515e-268	-0.757391	-2.53644
DLC1	2.01556e-268	-0.819265	-2.76624
PEG3	2.96658e-268	-0.69586	-1.1979
FBLIM1	2.35191e-265	0.186597	1.56983
GALNT1	1.67335e-263	-0.429179	-1.05529
SHISA8	8.39201e-263	0.0759517	2.07506
ZADH2	8.60924e-263	0.0868238	1.95886
CD63	3.43836e-262	-0.500863	-0.974695
TMEM59L	6.9831e-259	0.0487531	2.35981
DUT	9.65781e-256	0.32873	0.52183
FAM212A	2.32878e-254	-1.42482	-4.44722
CNN2	8.67854e-254	-0.938749	-2.41789
TDH	1.9579e-253	0.0491597	1.81051
LY6E	1.23047e-252	0.574491	1.08594
NDUFB4	2.56091e-252	0.314827	0.570498
ABLIM1	1.75781e-250	-0.578459	-2.10548
EIF1AX	3.49224e-250	0.275253	0.45744
IGFBP5	6.698e-250	-0.975825	-2.384
GM42637	1.7673e-249	0.0583034	2.20276
NFIB	3.80681e-248	0.0547283	2.28115
MAPK13	2.71979e-247	0.0776426	1.90636
CABP7	1.57268e-246	0.0286015	2.79025
MAP4K4	3.43012e-245	-0.383326	-0.685811
IGF2	7.80624e-244	-0.874445	-2.23443
CXXC4	4.068e-243	-0.562537	-2.2741
PMM1	2.59192e-242	0.457494	0.926467
GNAS	1.21088e-241	-0.254869	-0.367887
ZFHX3	1.23631e-240	-0.508252	-1.55712
PHLDA2	2.15818e-237	-0.189621	-1.12746
CLDN5	3.54652e-235	0.045363	1.59754
HAPLN1	3.68522e-235	-1.11684	-3.36327
ALKBH7	5.90846e-233	0.270457	1.18021
ROR2	7.78194e-233	0.32051	1.19093
CALD1	1.01212e-232	-0.550444	-0.918871
TRAF3IP1	4.2961e-232	0.219707	1.27918
HOXA5	4.71331e-232	0.0163688	3.15503
NME5	3.00162e-231	0.0356312	2.17962
TNFRSF19	3.00404e-231	0.407817	1.20849
CD47	1.65858e-230	-0.500864	-1.63576
NNAT	3.48306e-229	-0.53777	-0.883111
LMO1	1.18243e-228	-0.891339	-2.90755
CDH2	7.25026e-228	-0.532068	-1.15612
ARL4C	3.33671e-226	0.502676	1.14171
H2AFY2	1.92184e-225	-0.339886	-0.518308
HSP90AA1	1.39962e-224	0.261629	0.394842
RBPMS2	5.70076e-223	0.509266	1.05041
TSPAN18	5.89088e-223	-0.661056	-2.62036
COX8A	7.67182e-223	0.216056	0.322452
CBX7	1.13152e-222	0.0810017	1.78748
ZIC5	1.9678e-222	0.263898	1.20516
CDX4	4.8937e-220	0.0036274	5.31271
ITGA9	9.45371e-220	-0.811539	-3.7821
X5730596B20RIK	1.12304e-219	0.019983
LIMD2	2.90869e-219	-0.338952	-0.563981
NR6A1	4.05406e-219	0.573192	0.858912
EPB41L4AOS	6.21332e-218	0.483563	0.762394
FOXC1	1.07617e-217	-0.872414	-2.9882
MAFB	4.27475e-217	0.0808502	2.08496
RERG	3.68889e-216	0.0180938	2.94589
AGMAT	8.91895e-216	0.00758759	3.79587
GALT	3.13213e-214	0.121007	1.54989
ETS1	6.59564e-214	-1.49989	-5.28296
WLS	1.3144e-212	-0.436771	-0.785415
MBP	8.80614e-212	0.122092	1.61414
SPINT2	9.91634e-212	0.409619	1.04423
PDZD4	1.63326e-210	0.214579	1.34319
GCAT	2.91621e-210	0.450149	1.03887
TOMM7	3.29471e-210	0.249287	0.389648
FZD10	8.12728e-210	0.136121	1.64744
MAPKAPK2	8.395e-210	-0.41888	-1.23902
PPDPF	1.57038e-209	0.379423	0.65064
AR	1.82977e-209	0.0604307	1.9249
SOX1	4.80749e-209	0.251261	0.96699
PDGFRA	6.77654e-208	-0.706428	-2.00835
SLC1A3	4.43868e-206	0.179414	1.42936
CASP3	6.79656e-206	0.424471	0.759787
PKDCC	9.17289e-206	-0.562562	-1.10669
NRP1	1.03173e-205	-0.96527	-3.36465
SOX5	3.31843e-205	-0.751662	-3.658
PEG12	5.85491e-205	-0.578681	-2.29374
LIX1L	1.12051e-204	-0.489673	-2.26234
SIX1	1.5319e-204	-1.11048	-4.16856
TSPAN13	2.67766e-203	0.523646	1.04323
PSIP1	3.11362e-203	0.33133	0.524136
C430049E01RIK	8.14823e-203	0.0344666	2.34085
ETV4	2.28863e-202	0.0784056	2.04003
CLDN6	6.52234e-202	0.0578286	-0.345776
GNA14	7.93828e-201	0.0672784	1.92951
ACOT13	1.44807e-200	0.313333	1.03943
LLGL2	4.61371e-198	0.132845	1.4652
FAM57B	2.38053e-197	0.148873	1.35828
ACTB	2.94921e-197	-0.229374	-0.346264
TAX1BP3	5.86847e-197	-0.45086	-1.45852
CST3	7.01444e-197	-0.351997	-0.568352
IRX1	2.49976e-196	-0.631264	-1.76903
ZFP516	4.63356e-196	-0.392809	-1.21574
FUOM	6.3336e-196	0.0889905	1.63727
MAGED1	2.90525e-195	-0.364394	-0.659115
X2810459M11RIK	1.19683e-194	0.0177944
NDRG2	1.49581e-194	0.0570168	1.83602
MRPL28	9.09069e-194	0.25471	0.455342
MYCN	2.06921e-193	-0.450319	-0.904022
AMOT	7.05118e-193	-0.610556	-1.7341
CLIC1	1.0741e-192	-0.391798	-0.684775
ATP5K	2.11547e-192	0.318312	0.50656
TSC22D1	2.29735e-192	-0.361151	-0.659787
IRS4	3.56109e-191	-1.00227	-3.1031
ZFPM1	7.93703e-191	-0.82342	-2.96755
NPR3	1.1242e-190	-1.01326	-4.93151
SLC16A2	1.14193e-190	0.0834618	1.76319
FHDC1	3.8728e-190	0.107144	1.58398
DNAJC19	2.25164e-189	0.283685	0.532485
TCF12	3.93714e-189	-0.385038	-0.693672
POU3F1	4.59923e-189	0.427238	0.891009
IGFBP2	1.00674e-188	1.09995	1.02691
FIGN	1.08151e-188	-0.450368	-1.14353
DLEU7	2.31825e-188	0.0433023	2.19498
SOX4	1.74159e-185	-0.343405	-0.505116
PPP3CA	2.48429e-185	-0.433376	-1.22382
SH3GLB1	3.14402e-185	-0.379517	-0.732998
ZFP608	2.21469e-184	-0.409685	-1.05956
GLRA2	3.85262e-184	0.000881595	6.10598
HOXA3	5.02772e-184	0.0270336	2.45287
EYA1	5.9151e-184	-0.600557	-2.9749
FOXP4	1.35899e-183	-0.393982	-1.26973
CHN2	2.43155e-183	0.0795378	1.68792
NECTIN2	8.01668e-183	0.602715	0.943663
SMAD7	1.03108e-182	-0.554381	-2.18267
ACRBP	1.7949e-182	0.161619	1.35319
STMN3	2.8883e-182	0.155847	1.2766
CDKN1C	6.12581e-182	-0.715491	-1.37477
AKR1B3	9.00653e-182	0.357441	0.644412
P3H2	2.07565e-181	-0.570802	-2.50441
CDCA7	4.95046e-181	0.585895	0.702705
GPX6	5.08607e-181	0.00354282	4.33135
TGFB2	2.00555e-180	-0.868786	-3.16655
DUSP9	1.1762e-179	0.151427	-0.0524511
VCAN	1.84134e-179	-0.5753	-1.19268
FAM81A	2.33844e-179	0.0444916	1.96898
RANGRF	3.90049e-179	0.438391	0.7272
PROM1	9.91822e-179	0.359824	1.02014
PLIN3	1.39311e-178	-0.376034	-0.913688
HOXC4	7.61471e-178	0.00554033	3.82066
JPH4	3.07996e-177	0.105717	1.40527
NDUFS4	3.22891e-177	0.268408	0.498774
SIX3	4.073e-177	-1.58878	-3.78622
SALL3	4.13038e-177	0.287282	1.12399
GAS1	6.23195e-177	-0.472143	-1.10613
TCFL5	7.16274e-177	0.365001	1.05393
MAP1B	1.37518e-175	1.03248	0.937641
POLR2L	1.15821e-174	0.482323	0.760368
DUSP5	1.08243e-173	-0.475983	-2.06944
CHST2	1.08533e-173	-0.555908	-1.85637
TFPI	6.19281e-173	-0.677037	-2.62748
LAPTM4B	1.65092e-172	-0.433456	-1.1164
PHC1	1.96633e-172	0.333047	0.968497
ZFHX4	2.91881e-172	-0.557661	-2.27808
BTBD17	2.98277e-172	0.175679	1.36586
X6330403K07RIK	3.79143e-172	-0.456187
OTX1	1.96747e-171	-1.3079	-5.22922
CMAS	2.58858e-171	-0.326649	-0.827395
UQCRQ	2.59322e-171	0.243536	0.397605
LIX1	2.59322e-171	-0.611102	-1.9065
ISOC1	3.32945e-171	-0.315695	-0.704061
RNASE1	3.81458e-171	0.00286521	4.52805
CXCR4	5.41908e-171	-0.544975	-2.70332
STRA6	1.68167e-170	0.161299	1.36409
RPS27L	1.94831e-170	0.198998	0.305717
VSTM2B	2.04776e-170	-0.606236	-2.27398
TFE3	3.19635e-170	0.240972	1.0842
ZFP985	3.4105e-170	0.0772475	1.68099
APLN	5.93821e-170	0.0564853	2.08544
MPP6	1.15648e-169	-0.286032	-0.433803
EFNB1	1.395e-169	0.434102	1.0469
COL23A1	2.92183e-169	-0.668635	-2.41021
CRB3	4.39469e-169	0.074067	0.405805
KLF2	7.63232e-169	0.0580188	1.78824
GTF3A	9.35035e-169	0.298129	0.615094
MAF	1.61008e-168	-1.03972	-3.77466
A830018L16RIK	2.84032e-168	0.0944673	1.35031
ZSCAN10	3.27832e-168	0.151486	1.25431
DAB2	2.11573e-167	-0.602561	-1.70297
FERMT2	2.4533e-167	-0.338504	-0.619368
BCL11A	2.54974e-167	0.0240855	2.43219
GLUD1	6.76009e-167	-0.316778	-0.697453
FOXC2	1.33434e-166	-0.871483	-2.87619
SULT4A1	1.35386e-166	0.106704	1.44512
SMYD2	1.38408e-166	0.313763	0.880185
TPM1	1.93037e-166	-0.611557	-0.987104
EML1	4.36307e-166	0.194936	1.21586
CKS1B	5.54917e-166	-0.21524	-0.30652
ROBO1	1.08224e-165	-0.408526	-1.38662
ZWINT	3.41759e-165	-0.271448	-0.455578
IFITM2	3.75548e-165	-0.282725	-0.418259
SP8	1.22218e-164	0.165885	0.600278
BEX1	1.58587e-164	1.28734	0.798565
PTMS	2.82592e-164	-0.31849	-0.497734
CPVL	3.28505e-164	0.000976551	5.65214
SYT17	1.72614e-163	0.0253854	2.36454
IRF2BP2	3.4181e-163	-0.399671	-1.20936
TOMM40	3.60853e-163	0.254059	0.475826
NENF	1.75918e-162	-0.323992	-0.765974
MEOX1	2.67851e-162	0.0773708	-0.168685
LYAR	5.72502e-162	0.271364	0.442616
SIVA1	6.65041e-162	0.239091	0.385119
KRT18	2.22775e-161	-0.390199	-1.17265
AKT1	9.54828e-161	-0.351512	-0.865274
SELENOH	1.44615e-160	0.19894	0.31677
RHOBTB3	3.65767e-160	-0.297881	-0.529647
KDELR2	1.02054e-159	-0.297241	-0.543352
MTCH1	2.01758e-159	-0.2707	-0.452922
ROBO2	2.99939e-159	-0.609194	-2.7891
CSRP2	4.2409e-159	-0.494393	-0.819676
GNG5	6.65069e-159	-0.155195	-0.231026
ADPRH	6.88239e-159	-0.299152	-0.58855
TMEFF1	8.71051e-159	-0.313777	-0.611477
APBA2	2.8643e-158	0.145291	1.2618
TNRC6C	6.79552e-158	0.357918	0.663829
ACSL6	8.88453e-158	0.057122	1.76933
KIRREL	1.39719e-157	-0.393357	-1.56593
GM266	1.50061e-157	-0.712193	-3.16471
KIT	2.09105e-157	0.163719	1.24922
SLC2A1	2.21391e-157	0.586543	0.775353
MEF2C	2.71946e-157	-0.891765	-2.48229
CLDN7	5.93885e-157	0.0304867	-0.466794
RPS2	7.25126e-157	-0.171928	-0.245133
SOX9	8.79406e-157	-0.647354	-1.6522
LPL	1.9339e-156	0.218333	1.16655
ISL1	3.88529e-156	-1.00736	-3.57873
TLE4	9.23019e-156	-0.276722	-0.688101
TMEM132C	9.33121e-156	-0.633399	-2.68731
COPZ2	1.02367e-155	-0.423569	-1.96769
PTH1R	1.72823e-155	-0.495881	-1.65064
SLC12A2	1.11138e-154	-0.395776	-1.31103
FABP3	1.5825e-154	0.0730992	1.53937
P4HA1	1.97619e-154	-0.351935	-0.784496
PEG10	2.33351e-154	-0.537874	-1.56894
TTC3	4.34079e-154	-0.261174	-0.36705
FOXD1	4.66064e-154	-1.25476	-3.72967
IFITM1	3.14859e-153	0.0316299	-0.508819
EFNA5	6.42725e-153	-0.409784	-1.07473
CRABP1	9.084e-153	-0.651182	-1.07791
NUDT4	1.03107e-152	0.45697	0.810746
PTPN13	1.05138e-152	-0.368289	-0.810395
UBE2H	1.08562e-152	-0.348891	-1.11223
UQCR10	1.93206e-152	0.212033	0.345407
SLC7A7	2.39843e-152	0.0672171	1.43991
PLEKHO1	4.1027e-152	-0.351609	-0.92168
COL26A1	4.92195e-152	-0.739699	-2.92189
COL1A2	6.2231e-152	-0.723302	-2.67327
WTIP	7.30398e-152	-0.302327	-0.617187
TCF7L2	8.44431e-152	-0.420413	-0.97065
S100A10	1.09761e-151	-0.483856	-1.1208
HSP90AB1	1.33938e-151	0.161107	0.231496
NCALD	1.34684e-151	-0.531807	-2.99264
CELF4	1.57085e-151	0.14144	1.26227
CCDC28B	1.85185e-151	0.292284	0.845046
TMED2	2.32321e-151	-0.258601	-0.387429
ZDBF2	2.70109e-151	0.326601	0.998289
KRT8	2.77041e-151	-0.43881	-1.30645
GM10076	3.05877e-151	0.443053	0.640257
TIMM8B	1.06668e-150	0.224003	0.380263
ALYREF	1.82477e-150	-0.262859	-0.351204
MYO1B	1.97886e-150	-0.339593	-0.83404
APP	4.42122e-150	-0.391545	-0.952214
NASP	1.0006e-149	0.241573	0.38736
ETFB	1.32582e-149	-0.285037	-0.557737
HIST3H2BA	1.3972e-149	0.215353	1.04073
ENO1	1.42108e-149	0.231237	0.360953
FGFR2	4.26126e-149	0.277357	1.08371
SLC16A13	2.58367e-148	0.124813	1.31727
CPN1	3.3814e-148	0.0489203	1.50053
RBMS2	6.72005e-148	-0.307979	-0.750177
TNRC18	1.18365e-147	-0.373267	-1.06576
KCNK1	1.47327e-147	0.202952	1.06898
MDFI	2.64404e-147	-0.424439	-1.73008
TSPAN12	2.78806e-147	-0.406666	-1.40062
SYT3	4.26194e-147	0.0314206	2.08308
CKAP4	6.06944e-147	-0.312555	-0.586729
STRA13	3.76513e-146	0.267628	0.534059
RHOB	4.26326e-146	-0.38487	-1.3516
LAMA5	3.43984e-145	0.148483	1.25475
HOPX	3.43984e-145	-0.750811	-2.59819
COL2A1	5.63285e-145	-0.491147	-1.33795
PPFIBP1	1.0388e-144	-0.371831	-0.875954
RXRG	1.30708e-144	0.0523158	1.84329
ASS1	2.24741e-144	0.0326706	1.89443
H3F3A	4.07894e-144	-0.17529	-0.244035
EHBP1	9.74725e-144	-0.479115	-1.88239
SPATS2L	1.30908e-143	-0.45225	-2.06757
CAR3	1.97214e-143	0.106282	0.98329
NREP	2.05188e-143	-0.379364	-0.95002
HOXB8	3.41289e-143	0.020096	3.24357
AP3B2	3.60838e-142	0.0180712	2.5395
X1700013H16RIK	7.31739e-142	0.0963318
FDX1	1.18771e-141	0.215346	1.02434
ZEB1	1.54539e-141	-0.413634	-1.30629
ATXN10	4.8114e-141	-0.229099	-0.330727
RBM24	8.62737e-141	-0.667475	-2.40179
CD302	1.06729e-140	-0.346248	-1.30751
SEC61B	1.10934e-140	-0.164693	-0.237749
GATA6	1.16897e-140	-0.805095	-2.74334
TCAF1	1.6962e-140	-0.321269	-0.77667
COL9A1	2.62729e-140	-0.740096	-3.75379
TPM4	3.15198e-140	-0.301791	-0.465615
USP44	5.53378e-140	0.13517	1.23063
ASB4	7.83097e-140	-0.671813	-3.14208
TLX2	8.40457e-140	0.00653513	3.54336
EPHA7	2.057e-139	-0.575743	-2.02291
X2700033N17RIK	2.90193e-139	0.0877596
SOST	1.27594e-138	0.0124627	2.85249
GCHFR	1.2932e-138	-0.403172	-1.60119
LIN28A	1.3826e-138	0.336195	0.550929
TBRG1	1.54749e-138	-0.253003	-0.402065
PGAP1	1.73462e-138	0.165539	1.18392
TOX3	2.9799e-138	-0.363334	-0.997357
ATP6V1F	4.57065e-138	0.239452	0.43537
NDUFS6	5.06488e-138	0.198691	0.329453
ARPC2	8.92964e-138	-0.209734	-0.302107
PCDH1	1.475e-137	0.123907	1.25396
POLG	1.93956e-137	-0.398946	-1.05011
HSD11B2	4.49576e-137	-0.478407	-1.66726
SOX6	1.40103e-136	-0.67391	-4.00892
LHFP	1.9481e-136	-0.485683	-2.59523
VEGFC	4.46827e-136	-0.603327	-2.93708
MT-ND6	6.4399e-136	-0.413378	-0.817785
EID1	6.79657e-136	-0.245781	-0.35401
EN1	1.21866e-135	-1.809	-4.40272
CAPN2	2.42748e-135	-0.367483	-1.21404
SPRY1	3.26956e-135	-0.427618	-1.71618
MEX3A	3.30667e-135	-0.293652	-0.528556
AP1M2	3.96274e-135	0.0802839	0.666923
DDAH1	6.48038e-135	0.327083	0.894571
MYL12A	1.57285e-134	-0.260373	-0.40718
RPL37	2.62739e-134	0.169885	0.233918
NUDC	3.22247e-134	0.206565	0.363388
BMP5	4.55167e-134	-0.505194	-2.71865
IGF2BP3	7.0484e-134	-0.254006	-0.400202
CMTM3	9.21978e-134	-0.393118	-1.7795
MUM1L1	2.03342e-133	-0.383213	-1.25358
GNG11	3.60344e-133	-0.619625	-2.36736
MOBP	5.09048e-133	0.00615787	3.3926
STX3	5.52144e-133	0.189395	0.750048
CTBP2	9.5307e-133	0.299887	0.65821
POLR2M	1.52063e-132	-0.207076	-0.295004
DQX1	3.422e-132	0.230854	1.40969
TMSB10	3.55057e-132	-0.228765	-0.381484
HESX1	4.0721e-132	-1.03728	-3.49932
MFAP4	1.58571e-131	-0.451284	-2.01863
CLU	2.89551e-131	-0.49711	-2.06124
MARCKS	4.36118e-131	-0.264189	-0.415305
ETNK2	4.7021e-131	0.0231946	2.23623
HS3ST3B1	6.27661e-131	-0.46122	-2.40575
FNDC3B	1.51755e-130	-0.377752	-1.50897
ALX1	2.01145e-130	-0.76082	-3.51285
PLATR10	2.60277e-130	0.0223009	2.22545
HOXB4	3.83833e-130	0.075256	1.92046
NAV1	3.83833e-130	-0.361345	-0.868727
SOX13	7.01376e-130	0.206999	0.973556
NOL7	7.96162e-130	0.225519	0.405011
EPHA4	9.95139e-130	0.400951	1.01792
UCP2	2.0357e-129	0.261665	0.902249
PCDH7	3.84211e-129	-0.56875	-2.49596
GM12576	4.55886e-129	0.00320195	4.10062
RSPO3	4.71402e-129	0.0848388	-0.022416
AKR1A1	6.95796e-129	-0.219905	-0.34429
TCEA3	1.065e-128	0.108207	1.24386
FLRT2	1.10604e-128	-0.636471	-3.0991
SLC35F1	1.73003e-128	0.0739167	1.42073
ARF4	2.46716e-128	-0.237223	-0.375836
ALAD	3.11904e-128	-0.270796	-0.502285
SLC35G2	5.20472e-128	0.0278146	2.10396
RHOU	6.01241e-128	-0.370024	-1.0269
SDC3	7.01907e-128	-0.552467	-2.8521
GAP43	1.10619e-127	0.22508	0.815407
TRP53I11	1.13533e-127	0.25027	0.910276
KRTCAP3	1.20856e-127	0.101701	1.27602
COX5A	1.55056e-127	0.171689	0.265622
ID3	1.57003e-126	-0.416962	-0.630453
SOX12	1.72587e-126	-0.300952	-0.695908
ZBTB16	1.83021e-126	-0.410882	-1.54224
EEF1AKMT1	4.25778e-126	0.258256	0.524115
DHFR	6.37839e-126	0.278214	0.535821
H2-Q4	1.57848e-125	0.0593439	1.58137
ITGB1	1.95604e-125	-0.299177	-0.54448
CBS	3.58412e-125	0.0609934	1.54207
DDIT4L	6.84293e-125	0.0801405	1.41736
ARHGAP29	8.06443e-125	-0.383835	-0.982092
MSH2	1.14022e-124	0.330067	0.619945
EXOSC2	1.23971e-124	0.482729	0.812474
USP29	2.05158e-124	-0.417264	-1.81625
SNAI2	3.50659e-124	-0.792581	-3.51402
CAMK2D	3.88024e-124	-0.368345	-1.58582
X9130008F23RIK	4.22634e-124	0.0347237
SH3BP5	5.42036e-124	-0.452344	-2.05317
GMFG	1.79771e-123	0.127315	1.06213
SAMD1	2.18759e-123	-0.297917	-0.651291
HSPE1	2.76485e-123	0.157361	0.236691
PAFAH1B2	3.23477e-123	-0.245291	-0.442972
TTYH1	5.0495e-123	0.0466832	1.69853
GAMT	5.62856e-123	-0.346565	-1.62535
NEXN	7.89931e-123	-0.648641	-2.32444
TAF7	9.57934e-123	0.315317	0.564995
GM2694	2.0887e-122	-0.407119	-1.30092
MAP2K6	3.24982e-122	0.304914	0.804511
TENM4	3.55476e-122	-0.357899	-0.812506
ITIH5	1.16929e-121	-0.398064	-2.14583
SLC2A3	2.03119e-121	1.1328	0.780147
EDNRA	2.25789e-121	-0.495023	-2.63014
ADGRB2	2.41747e-121	0.0537516	1.58255
EMILIN1	8.12293e-121	-0.429773	-1.68914
HOXB9	1.15702e-120	0.00339888	4.57788
SMOC1	1.68572e-120	-0.508462	-1.93949
FRMD6	2.83526e-120	-0.385959	-1.52339
PYCARD	3.69525e-120	0.158678	1.08746
RSU1	5.49923e-120	-0.278762	-0.657122
TCF7L1	7.49529e-120	-0.310802	-0.749519
CAPN6	8.08601e-120	-0.738537	-3.26441
SLC38A4	1.08045e-119	-0.340259	-1.11293
CELF2	1.52118e-119	-0.341535	-0.964692
DDT	1.59722e-119	0.322284	0.487832
RCC2	1.90922e-119	0.233673	0.430422
PLA2G16	2.5244e-119	0.142318	1.10096
PTN	3.75361e-119	1.78246	0.435036
MAPK8IP2	4.63864e-119	0.0906702	1.14867
ZDHHC20	4.6856e-119	-0.295652	-0.785918
MPHOSPH8	9.35862e-119	0.250833	0.45543
UNC5C	2.38201e-118	-0.775331	-3.97969
DHRS3	2.46813e-118	0.0469343	1.57258
UTF1	3.66703e-118	0.0487594	1.31888
SLCO5A1	3.82647e-118	0.0602203	1.48576
ABCG2	4.24281e-118	-0.308441	-0.763277
GLRA1	4.58275e-118	0.00769945	3.33979
LHX2	9.2602e-118	-0.819405	-2.96803
SH3PXD2A	1.93879e-117	-0.343962	-1.74701
X2410080I02RIK	2.40039e-117	0.0111509
APOE	5.45414e-117	1.46154	0.691458
N4BP2	8.64851e-117	-0.29663	-0.620788
KMT2E	1.28147e-116	-0.296889	-0.71005
EBF2	1.46147e-116	-1.01828	-4.85991
CENPW	1.49394e-116	0.246104	0.463938
ADK	2.05637e-116	-0.248065	-0.424554
NEDD4	3.73691e-116	-0.199881	-0.271916
ERBIN	4.4898e-116	-0.32397	-1.15629
VIM	5.24487e-116	0.242956	-0.077118
RAPH1	6.30571e-116	-0.309813	-0.750424
BCAM	7.73247e-116	0.17282	0.701014
ARID3A	1.06741e-115	-0.32729	-0.718157
PRKCE	1.12594e-115	-0.383074	-2.17137
JUN	1.5113e-115	-0.449394	-1.23014
NFYB	1.91225e-115	0.264184	0.513185
TSPAN6	2.96525e-115	-0.234219	-0.363129
CYC1	3.98288e-115	0.207344	0.390374
DSG2	5.14926e-115	0.0946526	0.741036
CAPSL	7.98935e-115	0.0503095	1.32355
MORF4L2	5.20455e-114	-0.23762	-0.329891
B230312C02RIK	6.57891e-114	0.456556	0.846721
RPS6KA4	8.12239e-114	0.0353636	1.83802
SFXN1	8.90735e-114	0.253345	0.494046
LAMA1	1.04534e-113	-0.360347	-1.49293
APLNR	1.06576e-113	-0.537713	-2.23087
FKBP1A	1.20833e-113	-0.185074	-0.271622
HIST1H2AP	1.51747e-113	0.921248	1.11826
TBX1	2.13397e-113	-0.693054	-2.68933
X1190007I07RIK	2.63728e-113	0.265207
TULP4	3.50365e-113	-0.283075	-0.702317
CAR4	4.8243e-113	-0.337031	-0.794968
CMTM8	5.8035e-113	0.176323	0.254188
AQP11	6.82792e-113	0.110093	1.11709
DUSP6	9.64018e-113	-0.42798	-1.67497
RHBDL3	9.85223e-113	0.0214152	2.1774
PLA2G12A	1.21648e-112	0.331454	0.670379
PRUNE2	1.23831e-112	0.0278595	1.91756
CCNG1	1.79523e-112	0.2097	0.962179
CTDSPL	2.60736e-112	-0.32271	-1.01134
BGN	3.50839e-112	-0.749515	-4.3281
ARHGAP28	3.51098e-112	-0.334411	-1.14598
NTN1	6.55755e-112	0.116254	1.02153
KLF7	8.03235e-112	-0.370925	-1.39357
BBX	1.14863e-111	-0.265622	-0.479447
BLNK	1.55043e-111	0.0408806	1.75438
RFX4	3.13788e-111	-0.000925315	-0.295785
TMA7	3.59121e-111	0.143769	0.227703
XIST	4.25559e-111	0.22446	0.743406
FAM117A	4.44249e-111	0.158065	1.00504
ACP5	4.57875e-111	0.0541142	1.43194
COL5A2	4.78171e-111	-0.437028	-1.92907
KLHL13	5.62037e-111	-0.303572	-1.10847
RBMS1	7.17697e-111	-0.297193	-0.498038
MEX3B	7.58461e-111	-0.324004	-0.881915
CCNE1	9.70993e-111	0.443214	0.652778
GM6133	1.072e-110	-0.279783	-0.61899
F11R	1.72987e-110	0.189623	0.607378
PAX3	1.90401e-110	-0.552307	-1.69582
PPP1R1A	2.33831e-110	-0.324265	-0.729603
RCN2	2.50837e-110	-0.246138	-0.404017
DEGS1	2.70638e-110	-0.303147	-0.662823
BEX4	3.45328e-110	0.568924	0.605319
GLDC	4.53534e-110	0.191118	0.649321
GREM1	5.69395e-110	-0.787412	-4.48239
MAB21L2	5.81838e-110	-1.14239	-5.17906
RPL36AL	5.81877e-110	0.139777	0.208093
DPYSL2	5.83295e-110	-0.292786	-0.624322
TTC32	6.40707e-110	0.252552	0.811682
FEZF1	1.15615e-109	-1.08877	-4.52032
NKTR	1.38683e-109	-0.246533	-0.407932
MCM5	1.72042e-109	0.252624	0.487654
ARF5	1.85967e-109	-0.220316	-0.342208
ELOF1	1.92283e-109	0.191647	0.364302
CALCA	2.07842e-109	0.0929093	1.06543
SLITRK5	2.11541e-109	0.0817278	1.25596
SNAPC5	2.39049e-109	0.285276	0.599593
PIN4	2.61333e-109	0.207167	0.419557
FAM181B	2.71255e-109	-0.585784	-1.93269
AHNAK	3.25223e-109	-0.736252	-2.98815
FAM98C	3.6391e-109	0.191079	0.907491
PTPN6	7.14382e-109	0.083705	1.27051
BDH1	1.17825e-108	0.0439488	1.65132
PDLIM7	1.45957e-108	-0.298113	-0.61846
ACOT7	1.80851e-108	0.222043	0.902755
ESCO2	1.9451e-108	0.328335	0.72851
FOXP1	3.00954e-108	0.45751	0.749054
IDH3A	3.39461e-108	0.267327	0.571336
IGSF3	3.55313e-108	-0.3338	-1.18919
ANXA5	3.58869e-108	-0.375854	-1.34437
HEXB	5.76491e-108	0.078505	1.32444
YWHAB	6.12601e-108	-0.174934	-0.2504
NRXN2	1.38976e-107	0.1936	0.774164
MBNL2	2.32088e-107	-0.331354	-1.18678
MSRB2	2.65472e-107	0.0727187	1.3483
ANP32B	2.83051e-107	0.15429	0.23767
CNBP	2.8724e-107	-0.180359	-0.249359
LAPTM4A	4.60791e-107	-0.219488	-0.317286
EPHA5	7.28916e-107	0.0241203	2.26008
PAPSS1	7.9511e-107	-0.269906	-0.589626
UNG	1.10838e-106	0.480842	0.754091
POR	1.10838e-106	0.261401	0.823879
HINT1	1.26996e-106	0.153628	0.235478
MSX2	3.3574e-106	-0.565896	-2.39937
NCL	4.46625e-106	0.218472	0.344972
MYCL	5.28439e-106	0.162148	0.656783
GNB4	6.96663e-106	-0.326548	-1.07264
LGALS1	7.7445e-106	0.420893	0.758075
BIN1	1.03628e-105	-0.278971	-0.631823
RPL14	1.77604e-105	0.101757	0.149882
PLOD2	1.83892e-105	-0.306414	-0.697636
TMEM82	1.96083e-105	0.0726293	1.30522
PAX5	3.27768e-105	-1.08423	-4.47366
RND3	3.6365e-105	-0.328017	-0.863086
SRI	5.09377e-105	-0.273315	-0.549376
GLI3	6.82132e-105	-0.287621	-0.60284
SDC4	7.62347e-105	-0.315161	-1.07406
TFAP2B	1.05246e-104	-2.36697	-9.00678
HIST1H2AK	1.53822e-104	0.596089	0.952948
RGS3	1.92993e-104	-0.346716	-1.77717
SEPT2	1.98538e-104	-0.254419	-0.462565
TPD52	2.55768e-104	0.210026	0.810953
SEMA6D	2.86913e-104	-0.469604	-2.99725
ATP5B	3.08885e-104	0.181586	0.291918
GPX3	5.38278e-104	-0.392986	-1.09288
OAZ1	7.524e-104	-0.126536	-0.18632
ITGA8	2.30462e-103	-0.466753	-2.85137
NYNRIN	3.24393e-103	-0.284026	-0.8804
CLMP	3.73314e-103	-0.380645	-1.65896
JAK1	3.74528e-103	-0.290865	-0.763552
AP1S3	3.80845e-103	0.0778587	1.21122
PAK3	4.28815e-103	-0.443217	-2.27182
ZIC2	5.32683e-103	0.29029	0.782289
FGF3	6.59049e-103	0.0707833	0.765884
RAX	7.61984e-103	-1.22919	-4.32856
TXNDC5	8.09606e-103	-0.243043	-0.438805
X9530068E07RIK	8.93576e-103	-0.263415
SDCBP	1.03512e-102	-0.247408	-0.508297
SMARCD3	1.07221e-102	-0.48274	-1.94402
LRRC7	1.61747e-102	0.0184363	2.20404
RPS27	1.73711e-102	0.154134	0.224442
RPS29	1.88711e-102	0.173537	0.238194
GRB10	3.13509e-102	-0.277974	-0.413678
FBN1	3.13509e-102	-0.396421	-2.2425
DACT3	4.57446e-102	-0.387011	-2.34732
HAS2	1.07773e-101	-0.521794	-2.0522
PNP	1.09095e-101	0.336209	0.603531
GOLIM4	2.33134e-101	-0.274058	-0.642164
RPA1	2.56296e-101	0.274191	0.638134
HIST1H4D	2.78782e-101	0.333616	0.775617
EPS8	2.89548e-101	0.107487	1.03689
NABP2	4.39809e-101	0.235653	0.500459
UCHL1	4.91539e-101	-0.069813	-0.335107
TUBA4A	8.03669e-101	0.0663321	1.12441
ARHGAP24	9.85013e-101	0.0755764	1.37342
PLEKHG1	1.43612e-100	-0.420549	-2.75633
VAMP5	1.66331e-100	-0.576342	-2.74082
MFAP2	2.15839e-100	-0.27512	-0.640683
GAB1	5.42467e-100	-0.318712	-1.48729
ITM2A	5.98685e-100	-0.32333	-0.831511
SIK1	1.58742e-99	-0.335209	-2.015
GGCT	3.279e-99	0.232322	0.791907
ADGRL2	6.12506e-99	-0.304216	-0.578289
MMD	8.47007e-99	-0.294821	-0.974484
PITX2	1.23663e-98	-0.791729	-3.43762
GFRA3	2.20049e-98	0.0360133	1.87504
ARL6IP5	2.4316e-98	0.20507	0.830711
TCF15	2.66559e-98	-0.112244	-0.965754
GNB2	3.2102e-98	-0.199653	-0.311064
EYA2	4.15676e-98	-0.383296	-2.16141
SERTAD2	4.60817e-98	-0.271577	-0.823258
BMP4	5.68705e-98	-0.653446	-2.94297
ITGA5	6.68049e-98	-0.289984	-1.35308
EFCAB6	1.26065e-97	0.0220327	1.95017
PRKRA	1.55164e-97	-0.2234	-0.397188
S100A11	1.83497e-97	-0.377077	-1.51613
BNIP3L	1.90561e-97	-0.223267	-0.308414
CAMKV	2.6278e-97	0.0948223	1.03909
ZFP362	2.7158e-97	-0.287557	-1.09219
PRELID2	3.67898e-97	-0.265749	-0.587726
ARG1	4.28412e-97	-0.638599	-2.6092
SVEP1	5.79464e-97	-0.529147	-3.31683
KLF3	7.1697e-97	-0.309558	-0.727554
HIPK2	7.97027e-97	-0.270242	-0.59418
CDC42EP4	8.73709e-97	0.158909	0.956593
CSN3	9.82647e-97	0.0127702	2.47468
PDZK1	1.02927e-96	0.0257032	1.15955
MYL7	1.68517e-96	0.0260365	-0.65203
MED13L	2.42421e-96	-0.277059	-0.797367
PAM	2.51199e-96	-0.310587	-1.11806
APPL1	2.73499e-96	-0.247483	-0.568294
ILDR2	3.73912e-96	-0.200072	-0.741669
NR2F6	3.98355e-96	-0.260414	-0.486914
HOXD4	5.45047e-96	0.0200872	1.79968
SLC35F2	6.33396e-96	0.0802997	1.21054
DHCR24	6.86508e-96	0.277203	0.770325
IGF2R	6.88831e-96	-0.325476	-0.843257
LPP	7.08728e-96	-0.307991	-1.28968
MAML3	8.07057e-96	-0.292041	-0.819829
TSC22D3	9.58333e-96	-0.266709	-0.865033
RCSD1	1.35824e-95	-0.605075	-2.83399
SNRPN	1.37947e-95	0.357508	0.604512
TMEM30A	1.52524e-95	-0.254288	-0.612044
MEG3	1.69108e-95	0.775795	0.760278
FAM195B	1.69108e-95	-0.21197	-0.395324
ARHGAP31	1.71066e-95	-0.599753	-3.07758
KCNJ12	1.73418e-95	0.0333331	1.73412
CDC42	2.21961e-95	-0.169212	-0.238663
BMP7	2.36617e-95	-0.318934	-1.24158
EFNB3	2.73854e-95	-0.301617	-1.18958
ATP5C1	3.58286e-95	0.166885	0.270065
PPP1CB	7.14651e-95	-0.228036	-0.423288
ACTN1	8.44361e-95	-0.258313	-0.465201
TCEAL5	8.97164e-95	0.115832	1.01962
GLRX	1.04467e-94	-0.302113	-1.08796
FGF10	1.26634e-94	-0.496156	-3.2307
JAG1	1.39241e-94	-0.354531	-1.30589
FXN	1.4724e-94	0.252508	0.565091
ABCB6	1.57088e-94	0.104527	1.1157
PPP1R14A	1.85067e-94	-0.329068	-1.44382
CARNMT1	3.29426e-94	0.217724	0.467884
HIST1H4H	3.58822e-94	0.175237	0.975142
SYCE2	7.4601e-94	0.309269	0.591695
CRIP2	8.36962e-94	0.278084	0.356091
SERBP1	8.40446e-94	0.117794	0.183775
COL4A2	8.89235e-94	-0.308967	-0.911723
MYL6	1.01193e-93	-0.193171	-0.293802
PRDM1	1.59542e-93	-0.47264	-2.7702
CRMP1	1.64381e-93	0.249395	0.683086
EFNB2	1.76953e-93	-0.295096	-0.818065
DUSP14	2.51434e-93	0.0504631	1.49311
MID1	3.27365e-93	-0.291487	-0.695664
SIX2	3.8475e-93	-0.715549	-3.75896
MLLT3	4.51482e-93	-0.313179	-0.825734
ALDH1A2	7.85497e-93	-0.227373	-1.41759
CD248	9.96165e-93	-0.433407	-2.93517
FLNB	1.23168e-92	-0.297383	-1.03003
SFRP2	1.42518e-92	0.29603	0.624863
SPC25	2.33429e-92	0.308966	0.591487
DLK1	2.60578e-92	-0.525655	-1.97059
TNS3	6.43804e-92	0.158832	0.974271
SLC16A11	8.07941e-92	0.0129796	2.37592
RAB3IL1	1.06035e-91	-0.363292	-1.95651
HMBOX1	1.10614e-91	-0.274363	-0.923068
MRPL18	1.11223e-91	0.157955	0.280547
CHD3	1.24937e-91	0.304985	0.757422
S1PR2	1.37163e-91	-0.285637	-1.28953
ASAP1	1.41769e-91	-0.249296	-0.536069
SLC6A6	2.18016e-91	-0.271746	-0.600366
KDR	2.53202e-91	-0.75998	-2.8892
LRRK2	3.26488e-91	0.0128947	2.36813
MYC	3.68167e-91	-0.299654	-1.10125
DOCK7	4.15861e-91	-0.25589	-0.580211
ATP5G1	5.68072e-91	0.155002	0.240851
F2R	7.6193e-91	-0.285127	-0.735948
DPH3	7.6422e-91	0.197216	0.393292
MT-ND5	8.63456e-91	0.197525	0.312609
AMDHD1	8.68302e-91	0.00599338	3.12557
PDCD4	1.20798e-90	-0.276093	-0.581158
RPL24	1.71337e-90	0.0813839	0.114849
RPL9-PS6	1.85389e-90	-0.184138	-0.238153
CFL1	2.32907e-90	-0.126644	-0.168101
MAGED2	2.67961e-90	-0.278934	-0.697942
VASP	3.17194e-90	-0.256094	-0.581429
TNNT3	4.06121e-90	-0.527074	-3.60402
DTX3L	5.10068e-90	0.0529921	1.3875
LETM1	5.32801e-90	0.255046	0.618714
ADGRL1	5.68789e-90	-0.264499	-0.789634
XBP1	6.19828e-90	-0.264329	-0.568938
HMGN3	7.20204e-90	-0.256548	-0.541634
S100A6	7.6045e-90	-0.321319	-1.11327
NIPSNAP1	1.43608e-89	0.320575	0.600082
FOXP2	1.93524e-89	-0.640838	-3.79942
SDK2	2.46225e-89	-0.311845	-1.77924
TIPARP	3.30472e-89	-0.274205	-0.757964
AGTRAP	3.30904e-89	0.132838	0.979476
NDFIP2	3.83432e-89	-0.244161	-0.59897
HOOK1	5.12267e-89	0.22102	0.751826
HMCN1	5.17835e-89	-0.318844	-1.26629
RPL37A	5.33532e-89	0.124592	0.173734
RGL1	5.33532e-89	-0.273762	-1.18294
ATOX1	7.43986e-89	0.173807	0.306516
SMAP1	7.69453e-89	-0.188363	-0.293251
RHOJ	8.44948e-89	-0.987992	-4.86653
B4GALT6	1.16833e-88	-0.306288	-1.24749
CAP2	1.34575e-88	-0.425236	-2.59413
ARHGEF26	1.3647e-88	0.127926	1.01197
SELENOW	1.44983e-88	-0.175648	-0.267971
NRG1	1.50213e-88	-0.463609	-2.51901
RPS15	1.50719e-88	0.101531	0.15026
RFC1	1.85204e-88	0.191015	0.380646
VAMP8	3.00287e-88	0.0129347	-0.178276
MYO18A	3.77701e-88	-0.30234	-1.15169
X1700011H14RIK	4.34749e-88	0.0153543
TRIM54	5.93939e-88	0.0483582	1.2948
SLC39A8	6.35759e-88	-0.375944	-1.64594
NAP1L1	7.62819e-88	0.133661	0.208428
RPL6L	7.72973e-88	-0.18721	-0.26303
ZFP503	9.25953e-88	-0.0492336	-0.283771
TRIM2	1.02682e-87	0.221386	0.83264
POU3F2	1.1036e-87	-0.514885	-2.60638
RIN3	1.47447e-87	-0.451538	-3.27422
POLR2I	1.59363e-87	0.18244	0.349938
RPS13	2.52478e-87	0.0850705	0.126932
ZDHHC12	2.77348e-87	0.228184	0.775068
RNF7	3.35975e-87	-0.158954	-0.212444
MAGI1	5.7364e-87	0.181301	0.85893
NFKBIA	6.8229e-87	0.182045	0.817155
SH3BGRL3	9.78136e-87	-0.198787	-0.323976
SMARCA2	1.08161e-86	-0.248355	-0.629114
LMO3	1.14735e-86	-0.501357	-3.51456
B9D1	1.41201e-86	0.264425	0.522017
RAB6A	1.54599e-86	-0.218397	-0.413979
HIST1H2AE	1.71397e-86	0.428903	0.763731
HAND2	2.00707e-86	-0.628771	-2.91364
LMAN1	2.04869e-86	-0.212114	-0.327567
TRABD2B	2.07976e-86	-0.306681	-1.82033
RHOA	2.4302e-86	-0.157163	-0.221668
DPYSL3	2.94145e-86	-0.279831	-0.986826
APPBP2	3.01962e-86	-0.219921	-0.400227
CPED1	3.1641e-86	-0.666511	-3.95758
BAIAP2L1	3.45639e-86	0.181755	0.846969
SORBS2	4.17264e-86	-0.353899	-1.86502
AXIN2	6.5161e-86	0.232162	0.58029
UGP2	6.65705e-86	-0.252543	-0.778098
PSMB10	6.83404e-86	0.264731	0.637806
CHRNA4	7.5899e-86	0.0319764	1.65523
STRBP	9.17568e-86	0.265182	0.475017
SLC25A3	1.3231e-85	0.143522	0.2318
FZD1	1.35033e-85	-0.30135	-2.04745
CLDN3	1.35944e-85	0.0427291	1.01407
COX4I2	1.39647e-85	-0.273157	-1.11543
PRMT8	1.63139e-85	0.0358591	1.55745
ECE1	1.6346e-85	-0.282321	-0.941918
FZD5	1.92024e-85	-0.462425	-2.24502
EBF1	2.0973e-85	0.110752	0.19785
SEMA3A	2.48564e-85	-0.415588	-2.55493
RPS17	2.64139e-85	0.0945416	0.144038
SMARCA5	2.9061e-85	0.184432	0.317795
SET	3.09064e-85	0.143505	0.226621
IGF1R	3.1733e-85	-0.260038	-0.494323
FOXD2	3.96792e-85	-0.822212	-5.119
TANC2	6.40338e-85	-0.28691	-1.47518
CITED1	7.84527e-85	-0.484375	-1.65755
GM12829	1.01805e-84	-0.737686	-4.89051
SOX10	1.07545e-84	-1.3267	-5.23187
FGFRL1	1.17415e-84	-0.281167	-1.26991
CAPG	2.20063e-84	0.0885229	1.03558
GM8797	3.35922e-84	-0.221441	-0.312317
MCM3	3.4583e-84	0.214306	0.416403
PACSIN3	4.84495e-84	0.0942649	1.05066
RAPGEF5	4.86492e-84	0.073375	1.04688
X1700025G04RIK	5.07656e-84	-0.24849
LAMP2	5.18116e-84	-0.258818	-0.75154
TBX3	1.11946e-83	-0.559735	-3.05054
MAP3K1	1.51227e-83	-0.257991	-0.804898
MRPS6	1.79483e-83	-0.227795	-0.418844
PFN1	2.38527e-83	-0.164204	-0.214328
GOT1	2.54673e-83	0.251571	0.527835
H13	3.3929e-83	-0.226701	-0.527256
POU2F2	4.13891e-83	0.047641	1.4006
LRRC58	4.72959e-83	-0.195913	-0.285897
CD81	4.92743e-83	-0.218729	-0.340402
MT-CO1	5.13078e-83	0.185037	0.272375
NR0B1	5.35576e-83	0.00364899	3.48629
PTPRA	5.97533e-83	-0.234011	-0.558855
TSHZ2	7.10463e-83	-0.306753	-1.59177
COL4A1	9.15338e-83	-0.146505	-0.349692
NFIL3	9.9652e-83	-0.278275	-1.13345
CSNK1E	1.18708e-82	-0.207723	-0.32606
UBC	1.24678e-82	-0.24448	-0.341184
SHB	1.25896e-82	0.100429	0.971594
SALL1	1.33627e-82	-0.265081	-0.680005
GMFB	1.39868e-82	-0.218685	-0.427533
PTGDS	1.56832e-82	-0.521846	-3.02534
LASP1	1.63165e-82	-0.261077	-0.775524
TNKS	2.05492e-82	-0.248297	-0.579612
PJA2	2.05683e-82	-0.251468	-0.66328
RLIM	2.46166e-82	-0.244347	-0.606187
RPL36A	2.50114e-82	0.102415	0.149266
RARG	2.50542e-82	0.151053	0.858242
SPIRE2	2.56824e-82	0.0423411	1.42865
EVL	3.06052e-82	-0.210542	-0.400734
G3BP2	3.47256e-82	-0.158035	-0.207312
WDR83OS	4.33416e-82	-0.200144	-0.344052
ACP6	5.13119e-82	0.166628	0.82118
KRT5	5.977e-82	0.00430424	3.34978
TCEAL8	6.45231e-82	-0.185161	-0.255222
PDZRN3	6.97285e-82	0.124924	0.900202
TCF21	8.00709e-82	-0.742987	-4.15534
RRAGD	8.27409e-82	0.360129	0.616711
SEMA3F	8.6339e-82	-0.27708	-1.63451
LPAR6	9.89975e-82	-0.254888	-0.631583
RP23-220F20-2	1.04284e-81	-0.268668
CACHD1	1.21627e-81	0.249102	0.76528
RARB	1.42404e-81	0.0889143	0.931404
PDLIM1	1.94409e-81	0.154057	0.663188
NEBL	4.92768e-81	-0.547739	-2.71599
CNN3	5.0764e-81	-0.196911	-0.265126
BMP2	6.48711e-81	-0.581664	-3.03181
ZDHHC2	6.55454e-81	0.184632	0.796143
SEMA6A	6.74554e-81	0.194463	0.903023
KLF5	6.87526e-81	0.0410546	1.39082
DCXR	7.171e-81	0.0820989	1.1034
GJA1	7.91977e-81	0.456249	0.59494
CADM1	9.32493e-81	-0.205953	-0.351524
ATP6V1G1	9.37906e-81	-0.157033	-0.226175
GIPC1	1.05761e-80	-0.209314	-0.414316
RASA3	1.11522e-80	-0.319901	-1.81522
PAX8	1.31333e-80	-1.08052	-5.1622
GABARAP	1.73193e-80	-0.18549	-0.285339
SLC45A3	2.12165e-80	0.0342088	1.5932
JADE2	3.30361e-80	0.0274508	1.68814
SEPT7	3.62654e-80	-0.175312	-0.24843
WNT1	4.1887e-80	-1.16673	-4.94357
UBASH3B	5.5909e-80	-0.320623	-2.01273
FAM216A	5.80571e-80	-0.226492	-0.51714
TMEM55A	6.40258e-80	-0.223402	-0.534479
TAB2	6.98458e-80	-0.231669	-0.462715
SRP9	7.83179e-80	-0.182205	-0.254183
DNMT3A	8.27654e-80	0.258579	0.672712
ZFP422	9.40671e-80	-0.226671	-0.425266
FKBP9	9.71229e-80	-0.24181	-0.588898
EMX2	9.71382e-80	-1.04281	-5.12566
RPL41	1.20893e-79	0.110122	0.152309
SELENOK	1.38049e-79	-0.1918	-0.27493
WSB1	1.67775e-79	-0.232608	-0.500202
PRKAR1A	1.79468e-79	-0.189846	-0.314634
NOTUM	1.85766e-79	0.0270514	1.79844
ADAMTS9	1.86922e-79	-0.290617	-1.39327
RPS26	2.0241e-79	0.0967311	0.140092
H2AFJ	2.05142e-79	0.206606	0.399891
FYTTD1	2.33331e-79	-0.201168	-0.356005
CAPNS1	2.41448e-79	-0.203997	-0.358755
ATP5A1	3.04751e-79	0.158915	0.267515
PLCG2	4.75724e-79	0.0591096	0.82636
DDX18	5.09819e-79	0.185478	0.352486
ARF3	5.3578e-79	-0.229665	-0.553371
LIMCH1	5.39875e-79	-0.370499	-1.93256
ALCAM	6.16309e-79	0.102149	0.690299
SRP14	6.53701e-79	-0.154097	-0.209781
DGKB	7.34758e-79	0.00507236	2.99905
CCND1	8.74931e-79	0.495358	0.589512
TMTC4	8.90424e-79	-0.245037	-1.17575
DUSP7	9.13076e-79	-0.249915	-0.794581
RPL35A	1.07586e-78	0.100903	0.149377
SMIM14	1.25262e-78	-0.246728	-0.819241
JDP2	1.46955e-78	-0.425672	-2.87137
SPG20	1.5173e-78	-0.241689	-0.645289
ABHD8	1.61653e-78	0.182379	0.763953
GNB1	1.78681e-78	-0.158774	-0.214585
SALL2	1.98192e-78	-0.0460688	-0.204589
TMEM57	2.05788e-78	-0.223975	-0.476529
PTPRD	2.34415e-78	-0.294337	-1.49118
RAB14	2.43611e-78	-0.176411	-0.256455
SOX21	3.13599e-78	-0.355502	-1.12027
CDH13	3.46937e-78	0.0666386	1.05525
PEA15A	3.81159e-78	-0.239833	-0.726888
MRPL14	5.74193e-78	-0.182369	-0.29797
CDCA7L	6.01689e-78	0.261511	0.642199
NXN	6.93466e-78	0.276258	0.604103
ENPP2	8.62796e-78	-0.501936	-3.37933
KRCC1	1.03228e-77	-0.239591	-0.556044
FGF8	1.2141e-77	-0.102698	-0.623915
X2700081O15RIK	1.2141e-77	-0.243287
GMDS	1.21635e-77	-0.241234	-0.873489
CELSR1	1.32508e-77	0.13339	0.764789
MYLK	1.37906e-77	-0.331997	-1.64086
RPL36	1.39436e-77	0.115495	0.167917
GPX7	1.42496e-77	0.182115	0.774033
LRRFIP1	1.54793e-77	-0.251941	-0.563056
GPR153	2.01237e-77	0.0501298	1.1963
NKX2-5	2.05939e-77	-0.782381	-3.55772
OST4	2.08884e-77	-0.187533	-0.264952
HIST2H2AC	2.14431e-77	0.134598	0.983385
CACNG7	2.39575e-77	0.0489799	1.30724
TIMP3	3.79028e-77	-0.35354	-1.94584
RBAKDN	3.9801e-77	0.010971	2.34181
ANXA2	4.04206e-77	-0.390669	-1.5967
SRPK1	4.04412e-77	0.173399	0.332572
[truncated: 11,325 more rows]

## Sheet: PhenoGraph cluster 6
gene	P-value (FDR adjusted)	MAST Hurdle	logFC
[truncated: 12,449 more rows]

[truncated: 22 more sheets: PhenoGraph cluster 7, PhenoGraph cluster 8, PhenoGraph cluster 9, PhenoGraph cluster 10, PhenoGraph cluster 11, PhenoGraph cluster 12, PhenoGraph cluster 13, PhenoGraph cluster 14, PhenoGraph cluster 15, PhenoGraph cluster 16, PhenoGraph cluster 17, PhenoGraph cluster 18, PhenoGraph cluster 19, PhenoGraph cluster 20, PhenoGraph cluster 21, PhenoGraph cluster 22, PhenoGraph cluster 23, PhenoGraph cluster 24, PhenoGraph cluster 25, PhenoGraph cluster 26 …]
