# Supplementary material for: A single-cell atlas of spatial and temporal gene expression in the mouse cranial neural plate
Source: bioRxiv preprint, doi:10.1101/2024.08.25.609458, version 3 (2025-03-06)
Supplement: Table S3 [file 609458_file07.xlsx]

## Sheet: PhenoGraph cluster 0
gene	P-value (FDR adjusted)	MAST Hurdle	logFC
DNMT3B	0	1.56732	1.90353
PCSK1N	0	1.09603	1.64769
EZR	0	1.01798	1.55868
APOE	0	0.99063	1.24604
IRX3	0	0.912012	2.0355
ACER2	0	0.791261	1.75305
AES	0	0.784838	1.37246
POU5F1	0	0.757092	2.77579
IRX5	0	0.745515	2.08835
IQGAP1	0	0.712107	1.45585
LARP7	0	0.70103	1.12874
SOCS2	0	0.690699	1.71908
LY6E	0	0.671599	1.21293
ERAS	0	0.668485	1.70955
PIM2	0	0.584907	2.62282
ZIC3	0	0.560719	1.98948
RASGRP2	0	0.558086	1.6183
RBPMS2	0	0.554613	1.4227
EPCAM	0	0.546763	2.54137
CHCHD10	0	0.497529	2.34364
NDUFA12	0	0.446498	0.752644
SOX9	0	0.440038	1.73164
ATP5L	0	0.395332	0.639866
ECI1	0	0.315024	1.6126
NPTX2	0	0.249389	2.07427
CDH1	0	0.196116	2.30496
L1TD1	0	0.195002	1.71252
CGNL1	0	0.17982	2.59342
RSPO1	0	0.158902	2.40605
CYP26A1	0	0.148356	3.59779
PHOX2A	0	0.130531	2.65152
VRTN	0	0.0848385	2.44109
NANOG	0	0.0515796	3.38119
RPS2	0	-0.268592	-0.389285
ALYREF	0	-0.396794	-0.634075
GM1673	0	-0.495987	-1.01523
CUEDC1	0	-0.538332	-1.80398
NDN	0	-0.547388	-1.16999
HMGA2	0	-0.570325	-0.990154
H2AFY	0	-0.626062	-1.17498
RNF165	0	-0.630572	-2.05991
TLE4	0	-0.663003	-1.61124
PALLD	0	-0.67168	-1.80747
PRTG	0	-0.694844	-1.18835
CDH2	0	-0.776401	-1.88294
PEG12	0	-0.806419	-3.26267
CCND2	0	-0.861914	-1.6882
MEST	0	-0.893639	-1.39263
ZFP503	0	-1.05446	-3.31412
NR2F2	0	-1.37488	-4.01708
PAX6	0	-1.51373	-3.72069
GM45340	1.39654e-304	0.0310751	3.15105
RAB25	5.94927e-304	0.124829	1.97562
ATPIF1	3.04742e-303	0.310297	0.47116
X2900011O08RIK	1.46194e-302	0.147423
ATP5K	4.66611e-302	0.44993	0.712452
NRIP1	2.27695e-300	-0.678739	-1.82525
TOX3	3.57574e-299	-0.607832	-1.64987
HSP90AA1	1.37482e-297	0.314715	0.452779
LIX1	6.43462e-296	-0.90546	-2.41925
UBE2K	6.4836e-296	0.424648	0.687946
APOC1	2.58205e-295	0.139554	1.92279
HSPB1	4.81707e-295	0.112941	1.96863
CKB	2.73581e-286	0.456217	1.48709
MRPL34	3.49173e-283	0.471809	0.785858
ZFP36L1	8.82832e-279	-0.553253	-1.04061
FLRT3	8.31711e-277	-0.671122	-1.78532
SERF1	1.09606e-270	-0.497545	-1.0789
MARCKSL1	3.52151e-270	-0.268077	-0.398075
HS6ST1	7.90183e-269	0.390986	1.30549
COX7C	5.74237e-267	0.259722	0.38713
NBL1	1.7906e-265	0.0595051	2.43004
GM42637	1.65669e-263	0.0983446	2.09159
SERPINH1	8.94359e-263	-0.448814	-0.79929
ADPRH	2.90329e-262	-0.426837	-1.09197
CLDN6	3.65066e-262	0.117572	1.91794
IGDCC3	5.57967e-262	-0.696208	-1.88156
GM9847	7.09713e-262	0.137362	1.84762
POU3F2	6.44068e-261	-1.05466	-3.76085
FUOM	1.0543e-260	0.0891906	2.03203
CRABP1	2.73635e-258	-1.1417	-2.11144
X1810022K09RIK	1.42288e-257	0.393348
TOMM7	2.41359e-257	0.291316	0.449162
RPL31	4.91434e-256	0.195645	0.287619
FGFR1	7.56031e-256	0.641759	0.894998
FBLIM1	1.24741e-254	0.138762	1.76041
SIX3	3.26609e-254	-1.28761	-2.60341
JPH4	6.77416e-254	0.205874	1.60339
RPRM	5.12882e-253	-0.717501	-3.05827
DDIT4	2.67513e-252	0.582599	1.13716
IL17RD	3.6506e-252	-1.08412	-4.52117
SASH1	3.21699e-248	0.334124	1.31162
EFNB2	2.18149e-247	-0.668988	-2.06204
ZSCAN10	1.19434e-246	0.196467	1.58718
MYCL	1.00398e-244	-0.572109	-1.78015
ZBTB16	9.32206e-242	-0.583873	-1.92977
PHLDA2	1.70983e-241	0.227602	1.57715
VEZF1	2.70202e-239	-0.420747	-0.843589
UCHL1	2.05451e-237	-0.515321	-1.30649
TMED2	5.5072e-237	-0.341011	-0.571298
H2-K1	1.2661e-235	-0.476125	-1.21437
CCND1	3.12935e-234	-0.484302	-0.851736
NDRG2	5.66967e-234	0.0704016	2.12054
TMEM238	6.14044e-234	0.171269	1.58311
HPRT	2.16462e-232	0.54709	0.952399
CRABP2	6.35014e-228	-0.511044	-0.801562
PRRX1	1.2119e-227	0.0999045	1.95057
MIR124-2HG	3.69962e-227	-0.537966	-1.79747
CABP7	9.72296e-224	0.0453078	2.34636
NR2F1	4.13766e-223	-0.989177	-2.29831
HSP90AB1	9.63974e-223	0.212041	0.307926
GALNT12	1.91938e-221	0.0913061	1.93372
CELF2	1.09871e-219	-0.510671	-1.42772
ITGB5	1.28384e-219	0.205485	1.47534
PAX2	3.08235e-219	0.364865	1.33504
B230312C02RIK	1.86994e-217	0.587785	1.31456
SPON1	2.69661e-217	-0.718335	-2.31088
PTN	2.51363e-216	-0.679741	-1.01149
ROR1	7.38809e-215	0.136043	1.67197
TSC22D1	2.63632e-214	-0.401696	-0.703668
CFL2	3.66433e-214	-0.354827	-0.749891
RAX	3.7242e-214	-1.93109	-5.15224
AP1M2	5.72336e-213	0.0815867	1.85608
OXCT1	7.12799e-212	0.3319	1.26413
EGLN1	6.7923e-211	-0.367416	-0.847985
FZD3	6.84959e-211	-0.458975	-1.30151
FEZ1	1.14472e-210	-0.758887	-2.9344
SLC25A4	3.16222e-207	-0.384529	-0.614919
COX8A	6.12473e-206	0.219619	0.331861
WFDC2	1.11454e-205	0.582514	1.11434
ATP5B	2.05707e-205	0.275202	0.420852
PIM1	2.08729e-205	-0.733582	-2.56513
MEIS1	1.79444e-204	-0.64519	-2.53323
EMB	1.23132e-203	0.577647	0.823872
PDGFA	2.32537e-201	0.515679	1.01993
ILDR2	2.23539e-200	-0.561268	-1.32316
NASP	1.43105e-199	0.234814	0.346439
TMSB4X	3.53123e-199	-0.46175	-0.687183
TMA7	1.17453e-197	0.190332	0.280956
ADGRL3	7.79105e-197	-0.584501	-2.76069
JUND	1.01351e-196	-0.413669	-0.791472
BASP1	2.01176e-195	0.849514	0.784578
CTBP2	3.1247e-195	0.403055	0.792176
STX3	6.82295e-195	0.20907	1.36405
NR2F6	3.38103e-194	-0.385353	-0.777401
CXCL12	5.33943e-193	0.138209	1.29651
CAPG	8.04359e-193	0.0983099	1.72209
MPP6	1.51886e-191	-0.323278	-0.55326
ZFP422	4.97259e-191	-0.359906	-0.812153
MT-CO1	5.79439e-191	0.306378	0.451409
PHLDA1	3.60053e-190	-0.678537	-1.7407
GALNT1	3.95734e-190	-0.39435	-1.04259
PFN2	9.63884e-190	-0.373885	-1.00402
IGFBP5	6.95873e-188	-0.799614	-2.10497
TSPO	1.30966e-187	0.416231	1.00823
LPAR6	1.7432e-187	-0.440148	-1.36777
GNGT2	3.40603e-187	0.114457	1.60707
MT-ND6	3.42469e-187	-0.491779	-1.03639
SSBP2	6.67353e-187	-0.426949	-1.3732
FAM213A	9.00327e-187	0.407768	0.780071
RPL37A	1.07059e-185	0.196978	0.288245
ATP5A1	2.78284e-185	0.247496	0.397481
ACOT13	3.22534e-185	0.324052	1.08735
PLA2G16	3.72429e-185	0.156242	1.44039
NAV1	1.8542e-184	-0.481687	-1.20696
TNFRSF19	1.13466e-183	0.447022	1.08158
SCUBE1	2.03115e-183	-0.686399	-2.82664
TMEM132C	1.10384e-182	-0.744555	-3.30092
SALL4	3.07399e-182	0.555829	0.8055
CD47	2.17993e-180	-0.475597	-1.4378
FHOD3	3.75117e-180	-0.541949	-2.27942
GJC1	6.25362e-179	-0.338294	-0.750157
SPRY2	6.31131e-179	-0.66227	-2.0494
PAM	5.57914e-178	-0.504805	-1.81887
RARG	1.41312e-176	0.181606	1.3432
UQCR10	3.8973e-176	0.243767	0.388549
PTPRZ1	4.71382e-176	-0.593982	-2.13931
VSTM2B	1.48773e-175	-0.574145	-1.73126
FIGN	1.81018e-175	-0.440933	-1.21684
MPHOSPH8	3.48942e-175	0.292895	0.528512
OTX1	4.36866e-175	-0.873032	-2.72288
GALT	1.0084e-174	0.104348	1.61221
CRIP1	1.2543e-173	0.242811	1.23943
HELLS	4.8289e-172	0.360883	0.600698
GNG3	1.65593e-171	0.348926	1.05654
FOXI2	2.12701e-170	0.0111959	3.50483
HES5	2.63943e-170	-0.856267	-2.25562
PCDH1	3.05536e-170	0.126606	1.5259
PAX5	4.17344e-170	-1.09776	-3.54275
ZCCHC11	9.56119e-170	-0.325145	-0.59288
GM10076	2.16834e-169	0.522907	0.774333
NDNF	1.37784e-168	-0.840297	-4.07079
GMFG	4.65045e-168	0.136624	1.43902
SLC9A3R1	4.87074e-167	0.527713	0.83754
MEG3	1.26344e-166	0.817636	0.862479
SSSCA1	1.09734e-165	0.32917	0.584554
THBS1	1.2516e-165	-1.04573	-4.59917
KHDRBS3	1.51656e-165	-0.346419	-0.735722
SMS	1.6473e-164	0.397339	0.540004
TCF12	1.23215e-163	-0.362188	-0.712985
MYO10	1.99464e-163	0.558362	0.832656
JAKMIP1	2.15672e-163	0.0372807	2.27638
PSIP1	2.00627e-162	0.207072	0.316068
IRF2BP2	2.67712e-162	-0.424796	-1.52945
BAZ1A	5.28943e-162	-0.409621	-1.04671
FEZF1	4.14375e-161	-0.930738	-3.17095
ID3	1.10563e-160	-0.565632	-0.906623
MYC	1.32832e-160	-0.505974	-1.88121
PFDN2	1.62062e-158	-0.251736	-0.397115
YAF2	3.76258e-158	-0.325687	-0.739987
A730017C20RIK	4.03707e-158	-0.665001	-3.73998
SON	2.43102e-157	0.249724	0.418867
QK	1.91834e-156	-0.316663	-0.504088
MLLT3	2.66714e-156	-0.45735	-1.17236
DYNLL2	4.39617e-156	-0.283908	-0.482884
FAM49B	4.39617e-156	-0.303006	-0.585452
PAFAH1B2	2.48497e-155	-0.29328	-0.607827
SAP30	6.49324e-155	-0.308129	-0.542278
MAGEH1	2.82789e-154	-0.350288	-0.845378
PGM2	3.771e-154	0.340548	0.977873
MT-CO3	1.7105e-153	0.285858	0.427935
HMGB3	1.94025e-153	-0.230585	-0.350568
ZFP703	2.17474e-153	-0.790387	-2.60869
IFITM1	5.47976e-153	0.705147	0.888622
RPL37	6.11807e-153	0.199702	0.295106
FAM57B	3.36967e-152	0.237668	1.13017
CHST2	4.10359e-152	-0.542367	-1.54236
LMO3	4.34701e-152	-0.629268	-3.61594
STOX2	6.03612e-152	-0.397342	-0.896113
NREP	8.42457e-152	-0.412412	-1.15466
F11R	1.05345e-151	0.211107	1.17361
C130026L21RIK	2.9564e-151	-0.557384	-2.99283
SCG5	5.22622e-151	-0.418843	-1.51946
SORBS2	1.7993e-150	-0.508301	-2.04052
HESX1	1.83785e-150	0.0573634	-0.138078
LHX2	3.29741e-150	-0.885413	-2.51098
CLDN7	3.93448e-150	0.0848614	1.56005
SLC1A3	9.75254e-150	0.19255	1.233
KLF9	1.68518e-149	0.183874	1.27572
A830018L16RIK	3.11697e-149	0.127671	1.39937
SPINT2	4.436e-149	0.359669	0.95241
PKIG	8.88275e-149	-0.266169	-0.519341
TMEM47	1.17515e-148	-0.382944	-0.765015
GM6133	1.57908e-148	-0.342075	-0.84734
EIF1AX	1.72174e-148	0.198168	0.324679
SHB	4.49997e-148	0.131327	1.36327
EN1	4.16317e-147	-0.0441007	-0.482515
MRPL42	5.41667e-147	0.250178	0.434586
COX5A	7.16625e-147	0.186599	0.292847
IGFBP4	1.00884e-145	-0.35554	-0.908844
RPL9-PS6	1.14627e-144	-0.238247	-0.370475
CHD3	1.5491e-144	-0.387461	-1.03244
TCF7L1	1.57749e-144	0.448089	0.889433
RHOBTB3	2.23233e-143	-0.307777	-0.606898
HOXA1	3.12048e-143	-0.372112	-1.79247
RPS29	8.22714e-143	0.221455	0.324459
MAP1A	1.17753e-142	0.22359	1.12765
PCSK2	2.19226e-142	0.0891479	1.69906
NDUFC1	1.04965e-141	0.23014	0.380762
MKRN3	2.80272e-141	-0.478726	-2.18263
WDR83OS	1.94335e-140	-0.281094	-0.567804
SERPINB6A	4.29042e-140	0.312725	0.937536
ISOC1	6.86331e-140	-0.303742	-0.767155
MTAP	7.49721e-140	-0.279379	-0.523896
LDHB	1.53357e-139	0.702043	0.775775
TSNAX	4.00637e-139	-0.294471	-0.73821
COMMD3	4.17049e-139	0.341603	0.882839
SRI	4.86483e-139	-0.315875	-0.84208
PPP1R14A	2.60649e-138	0.0971209	1.53282
FBN2	7.29562e-138	-0.532762	-1.75649
ZFP800	8.42895e-138	-0.389606	-1.44898
WNT5B	3.62262e-137	-0.469151	-2.25638
SLC2A3	8.46336e-137	0.457464	0.636521
OAT	1.84993e-136	0.431078	0.91146
PPP1R9A	1.25854e-135	-0.372295	-1.08088
HS3ST3B1	1.31829e-135	-0.724006	-4.05967
MDK	1.80883e-135	-0.223906	-0.328206
SNRPN	3.38497e-135	0.346325	0.619769
KDELR2	1.36475e-134	-0.275201	-0.557422
DDT	6.26382e-134	0.251103	0.444151
FGFRL1	7.66805e-134	-0.436506	-2.285
FHL1	1.67707e-133	-0.366967	-0.906233
EPHA7	1.67709e-133	-0.575391	-1.60906
OTX2	4.30391e-133	0.424197	0.454475
LGALS1	8.11363e-133	0.386607	0.881869
COX7B	1.02892e-132	0.190846	0.297068
MT-ND1	1.76767e-132	0.31784	0.47832
KRT8	2.8551e-132	0.236039	1.00734
FBLN1	3.77676e-132	-0.33288	-0.761329
RNF7	5.42167e-131	-0.201128	-0.312177
NFASC	1.56519e-130	0.125976	1.3373
HNRNPF	1.62993e-130	-0.210165	-0.317333
PAX8	1.8488e-130	-1.13274	-4.57561
ELAVL3	2.63615e-130	0.109572	1.46942
DUSP9	2.6482e-130	0.150706	1.11604
MYL7	5.86383e-130	0.0877069	1.50715
EPS8	1.68157e-129	0.171537	1.16163
PYCARD	8.34451e-129	0.180895	1.16358
MTAP7D3	8.37483e-129	0.245538	1.06776
ZFHX4	1.82567e-128	-0.499153	-1.84095
DPYSL2	2.92722e-128	-0.347616	-0.813323
ADGRL2	3.09283e-128	-0.355894	-0.711446
MSI2	4.82155e-128	-0.326785	-0.668508
DMBX1	7.14794e-128	0.0459767	1.78599
HSPA4L	1.20243e-127	-0.391736	-1.36986
PDLIM1	3.45227e-127	0.109749	1.22769
AQP11	3.95113e-127	-0.392467	-1.83871
SOX11	8.78112e-127	-0.292639	-0.440321
SLC6A13	1.19123e-126	0.020139	2.5632
ATP6V1F	2.01654e-126	0.221456	0.386204
LMX1B	3.87106e-126	0.130044	1.20336
ACADL	8.38028e-126	0.258744	0.979206
WSCD1	1.15053e-125	-0.42558	-1.61212
RPA3	1.88219e-125	-0.270858	-0.456967
MCF2	1.95659e-125	0.158831	1.20235
FKBP1A	4.14217e-125	-0.190591	-0.286169
LMO1	4.84872e-125	0.381288	1.18127
CTSL	8.63304e-125	-0.265458	-0.41044
MYCN	2.63325e-124	-0.347839	-0.738568
UQCRQ	3.3352e-124	0.211984	0.345196
PACSIN3	3.71841e-124	0.115373	1.28933
RUFY3	5.65501e-124	-0.372311	-1.35514
TAL2	7.97658e-124	0.167555	0.506828
GPC3	7.97658e-124	-0.368342	-0.743048
STUM	1.78771e-123	0.0400363	2.0093
MZT1	1.86757e-123	-0.30212	-0.859177
KRTCAP3	3.68841e-123	0.0946574	1.39622
RBM3	8.18695e-123	-0.19016	-0.289591
HIST1H2AP	1.0854e-122	1.09884	1.22646
BTBD17	1.3685e-122	0.27448	1.03319
PLATR10	1.98175e-122	0.0304282	2.15835
SH3GL3	2.04499e-122	0.0882848	1.39041
TSHZ1	4.57778e-122	-0.624594	-2.69592
ZFP266	4.74541e-122	-0.271261	-0.535153
NRG1	4.94357e-122	-0.750422	-3.56967
RTN3	9.12475e-122	-0.235799	-0.366818
RPL6	1.08402e-121	0.143922	0.213764
TSPAN6	2.57769e-121	-0.260948	-0.469869
HES3	2.60483e-121	-0.437644	-1.09069
FABP3	6.44696e-121	0.0865955	1.4067
LRRTM3	3.37991e-120	-0.677665	-3.9051
TBCA	3.79257e-120	0.212985	0.353855
SPEG	4.9283e-120	0.212007	1.0128
DYNLL1	7.58375e-120	0.161497	0.238019
X1700027J19RIK	9.16674e-120	0.34034
RPS9	2.37455e-119	0.133468	0.193231
FAM181B	2.42669e-119	0.290523	0.338887
ATP5J2	3.30167e-119	0.163803	0.248761
RPS17	6.11878e-119	0.111929	0.161405
OAZ1	8.82971e-119	-0.132728	-0.190703
RAI14	1.35928e-118	-0.382241	-1.3275
NDUFV3	2.123e-118	0.254955	0.445572
PBX1	4.57109e-118	0.327973	0.560644
MAPKAPK2	5.70315e-118	-0.328278	-1.10249
PEG10	1.27338e-117	-0.451911	-1.75839
TSPAN3	4.39201e-117	-0.231937	-0.37856
GRB10	9.18005e-117	-0.299396	-0.490534
RPL36	1.11085e-116	0.14719	0.214352
SEZ6	2.37139e-116	0.0417069	1.93762
EDN1	2.45798e-116	-0.97904	-5.3517
RTN1	3.26381e-116	-0.367964	-1.26666
NECTIN3	3.51059e-116	-0.283319	-0.607083
HCFC1R1	3.99432e-116	0.266385	0.869538
IRX2	9.68778e-116	-0.512938	-1.64904
TSPAN13	1.26382e-115	-0.300473	-0.632707
EHBP1	2.88519e-115	-0.426733	-1.35098
ZFP36L2	1.025e-114	0.257142	0.976833
RPS27	1.03979e-114	0.173626	0.254281
ERMN	1.43936e-114	-0.901514	-4.06346
SELENOK	1.80789e-114	-0.232479	-0.388652
WLS	2.0241e-114	-0.0557617	-0.319458
ELAVL1	2.48925e-114	-0.217659	-0.362277
ZWINT	3.48978e-114	-0.242095	-0.444482
AKAP12	4.1301e-114	0.407826	0.809548
PCDH17	4.63459e-114	-0.851982	-4.51635
X2700046A07RIK	5.15161e-114	-1.12385
ARL4A	7.72084e-114	-0.493995	-1.34919
ATP5C1	1.84601e-113	0.193527	0.3177
TIMP3	2.86963e-113	-0.696186	-3.02338
FGF5	4.27289e-113	0.0409041	1.79367
FOXD1	5.09032e-113	-1.16001	-3.82286
MIR17HG	5.25637e-113	-0.336562	-0.731055
IRX1	1.0071e-112	0.220599	0.587851
ALAD	1.0675e-112	-0.267057	-0.563879
X1700013H16RIK	1.95361e-112	0.143369
MOV10	2.24661e-112	0.0406716	1.81909
NDUFS6	4.71279e-112	0.189243	0.306708
H3F3A	9.19431e-112	-0.135565	-0.200121
PPP3CA	1.81937e-111	-0.345451	-1.15915
ECHDC2	7.8063e-111	0.169862	1.04541
YWHAQ	7.8494e-111	-0.167429	-0.255029
OPCML	1.51883e-110	-0.657984	-3.01783
HOXB2	1.6496e-110	-0.69955	-2.48775
GLI3	1.68402e-110	-0.338615	-0.750125
DQX1	1.95996e-110	0.199484	1.16929
PHLDA3	2.63992e-110	0.172434	0.734154
RPL36AL	6.50121e-110	0.145012	0.218572
PDHA1	6.71645e-110	-0.284385	-0.502704
GM9493	1.39069e-109	-0.203842	-0.316562
DLL1	1.67366e-109	-0.507056	-2.65857
JAG1	1.75766e-109	-0.420372	-1.38536
TMEM98	2.20596e-109	0.0857246	1.37096
SPAG9	2.84258e-109	-0.307674	-0.745966
PLCB4	5.12745e-109	-0.332921	-1.06844
EN2	6.4656e-109	-1.38995	-4.98053
HN1	6.88895e-109	-0.241877	-0.375963
TM9SF3	7.13018e-109	-0.269024	-0.488723
YAE1D1	7.61885e-109	-0.243816	-0.432785
PBX3	1.3334e-108	0.389234	0.665028
HIPK2	1.62733e-108	-0.292916	-0.696531
DSTN	1.88029e-108	0.214533	0.380918
ZFP516	2.90516e-108	-0.330429	-1.0109
LHX5	4.48109e-108	0.106916	0.0855752
COX6B2	6.79579e-108	0.273442	0.851869
KCNJ12	8.13248e-108	0.0419208	1.85816
RPL6L	1.37455e-107	-0.218796	-0.351737
NRP1	1.41784e-107	-0.530124	-2.97876
ZEB1	8.14148e-107	-0.357566	-1.14512
PLS3	1.34374e-106	0.460151	0.669059
SALL2	1.44427e-106	-0.311125	-0.627336
HIST1H2AK	1.82187e-106	0.673202	1.00572
NDUFB9	4.61538e-106	0.184398	0.309618
FGFBP3	4.65697e-106	-0.488281	-2.05434
CITED2	7.60024e-106	0.472788	0.650927
TUBB2B	1.04401e-105	-0.35186	-0.736604
TUBA4A	1.65861e-105	0.0551904	1.56487
TIMM8B	1.73115e-105	0.189507	0.315164
D1ERTD622E	2.63991e-105	-0.371149	-1.87402
COX20	2.92251e-105	0.336361	0.722335
UCP2	4.91742e-105	0.275298	0.849493
EIF3C	5.46869e-105	0.161525	0.253033
VIM	6.13475e-105	0.378881	0.692454
DUSP4	6.99901e-105	0.205535	1.01892
EML1	9.70124e-105	-0.316859	-1.09326
IRS4	1.06031e-104	-0.404475	-1.06523
SPRED1	1.22806e-104	-0.351806	-0.861465
APLP2	1.51822e-104	0.282956	0.524397
BTRC	1.51822e-104	0.185938	0.944807
TOP2B	1.7214e-104	-0.283107	-0.620048
MEX3B	1.78859e-104	-0.350885	-1.00665
TTR	3.52416e-104	0.0367323	2.09335
TNRC18	4.75244e-104	-0.347526	-1.06208
TTC3	8.51804e-104	-0.221239	-0.332715
A430005L14RIK	1.0068e-103	-0.251398	-0.4931
PRSS23	1.04479e-103	-0.435753	-1.89375
VCAN	1.24708e-103	-0.391411	-1.07098
ZFP706	1.28338e-103	-0.190524	-0.293513
RPL38	1.40459e-103	0.169771	0.249376
ARF4	1.91177e-103	-0.224637	-0.369689
MRPL14	2.60718e-103	-0.220208	-0.393429
PODXL2	3.37288e-103	-0.365909	-2.16794
LAPTM4B	3.5263e-103	-0.308248	-0.967755
EPB41L4A	4.2183e-103	-0.391009	-1.67411
MID1IP1	5.41693e-103	0.237214	0.932861
RPL35A	5.65304e-103	0.114934	0.168321
KMT2E	5.99258e-103	-0.295093	-0.724083
TSPAN18	8.01092e-103	0.135655	1.14585
UPP1	1.06188e-102	0.0304624	-0.191973
MYO5B	5.28488e-102	-0.559092	-3.46159
RPS15	7.175e-102	0.109643	0.159168
P4HA1	1.99328e-101	-0.28818	-0.675588
WHSC1	2.41669e-101	-0.258452	-0.432618
KLF3	4.4805e-101	-0.340652	-0.799899
SRP14	5.34738e-101	-0.17552	-0.285062
FOXB1	9.46719e-101	0.424581	0.9126
ZC3HAV1L	3.12927e-100	-0.324398	-1.61769
ERBIN	5.27636e-100	-0.327418	-1.25528
MORF4L2	6.15108e-100	-0.226868	-0.346307
ADK	6.53269e-100	-0.235332	-0.473446
LRRN2	6.54347e-100	0.0343347	1.89029
HMGN5	1.94824e-99	0.313697	0.537993
CXXC4	3.07046e-99	-0.357582	-1.43101
RBPMS	4.68001e-99	0.294632	0.617264
NSG1	4.90327e-99	-0.319316	-1.22262
SPCS2	6.82304e-99	-0.185437	-0.271965
FAM216A	1.16557e-98	-0.263308	-0.681722
PLPP2	1.23365e-98	0.138661	1.05266
LEF1	1.46235e-98	-0.321333	-0.930569
X6330403K07RIK	3.6845e-98	-0.311867
SOD2	8.69197e-98	-0.232076	-0.441827
UBE3A	9.00979e-98	-0.215398	-0.345252
MID1	9.56924e-98	-0.322933	-0.818582
CNTN2	1.07932e-97	0.0254384	2.06952
ALKBH7	2.84593e-97	0.223083	0.872784
WNT8A	4.44576e-97	0.040864	-0.0246436
NKX2-9	5.10227e-97	-1.37242	-4.20416
PRDX6	5.73743e-97	0.178734	0.287503
RPS21	6.61884e-97	0.149776	0.220061
TAB2	8.37633e-97	-0.269384	-0.5943
POLR2L	1.06046e-96	0.380241	0.650459
WDR6	1.56827e-96	-0.274412	-0.660716
CENPV	1.57401e-96	-0.28836	-0.910078
EPHA4	1.65723e-96	-0.342387	-0.816742
POLR2M	2.166e-96	-0.188384	-0.287318
PTEN	2.41825e-96	0.255063	0.498908
SOD1	4.61212e-96	0.351748	0.621775
SPINK1	5.26358e-96	0.0905889	1.27903
KIF1B	1.02734e-95	-0.272892	-0.589012
KDELR1	1.27845e-95	-0.238862	-0.528977
MYLK	2.46348e-95	-0.381419	-1.33254
SEPT3	4.72344e-95	-0.288755	-0.750098
MT-ATP6	5.34292e-95	0.214763	0.322802
ETFA	6.82223e-95	0.264515	0.773232
H19	6.83061e-95	0.22114	0.900617
DDX18	7.01315e-95	0.206629	0.369301
AQP5	9.67129e-95	0.00926626	2.96443
RPL9	1.11358e-94	-0.0963177	-0.139673
N4BP2	2.49177e-94	-0.284443	-0.647418
ALPL	3.00732e-94	-0.331849	-1.21528
RP23-220F20-2	4.25574e-94	-0.291893
FGFR2	4.40666e-94	0.319117	0.727786
X2510009E07RIK	7.54286e-94	-0.389333
TUBB3	9.03855e-94	0.339096	0.749587
TMEM167	9.13468e-94	-0.176102	-0.273882
ADAM10	9.78232e-94	-0.301094	-1.05066
CXCR4	1.70108e-93	-0.360516	-1.81259
TSPAN17	1.89141e-93	0.0259488	1.99204
FST	3.0343e-93	0.363329	0.391223
SELENOF	4.00171e-93	-0.193765	-0.289529
X1700025G04RIK	5.87315e-93	-0.273943
IFITM2	7.97874e-93	0.265141	0.4189
BNIP3L	8.1049e-93	-0.197006	-0.307285
TEX15	1.02617e-92	0.0883495	1.21795
RAB28	1.60446e-92	-0.25602	-0.654512
MAF	1.73412e-92	-0.761726	-3.0378
BAZ2B	1.07235e-91	-0.281857	-0.680221
RSL24D1	1.09439e-91	-0.215837	-0.36184
EFNA2	1.21003e-91	-0.36391	-1.01208
EIF1A	2.07553e-91	-0.213714	-0.363736
DDAH1	2.76181e-91	0.308184	0.667666
LMO7	3.01143e-91	0.0549377	1.43138
TRA2A	4.81921e-91	-0.207028	-0.298118
COPZ2	1.17822e-90	-0.320658	-1.78361
ATP5O	1.24433e-90	0.179995	0.29313
SFRP2	1.80077e-90	-0.268433	-0.554018
CASK	1.93856e-90	-0.302748	-1.15615
RXRG	3.92085e-90	0.0631764	1.4283
MGST1	4.0802e-90	-0.276891	-0.925992
ZDHHC2	4.45162e-90	0.194171	0.893413
ARMCX1	6.03655e-90	-0.264377	-0.686363
ATOX1	7.57215e-90	0.188622	0.331802
CNBP	1.12701e-89	-0.164675	-0.240557
PYGO1	1.42332e-89	-0.363663	-2.38701
CD24A	2.39033e-89	0.428271	0.500755
ATP5J	2.60933e-89	0.131226	0.20652
RPS18	3.41254e-89	-0.10256	-0.153119
ATP2B1	3.41636e-89	-0.230138	-0.40306
TENM4	3.91249e-89	-0.299466	-0.638558
FDX1	5.17874e-89	0.17865	0.902636
GKAP1	9.35475e-89	-0.237774	-0.492942
RBP1	1.54247e-88	-0.297098	-0.545298
TTC28	1.62002e-88	-0.322476	-1.25778
MMD	1.8178e-88	-0.289276	-1.27623
SRP9	2.35044e-88	-0.192193	-0.345867
PTPN6	2.72694e-88	0.0958539	1.16171
HOXB1	2.77117e-88	-0.386928	-1.94942
APOOL	2.92848e-88	-0.252439	-0.685267
UQCR11	3.23735e-88	0.165747	0.271969
XIST	4.07701e-88	0.219437	0.809409
AKT1	4.34797e-88	-0.268681	-0.791583
HMGN3	5.42593e-88	-0.260183	-0.561097
NENF	5.80913e-88	-0.249603	-0.627156
FBLN2	1.04388e-87	-0.384181	-1.91253
NDUFB4	1.2897e-87	0.20723	0.389405
ACRBP	2.43473e-87	0.153965	0.977304
ORMDL1	4.3007e-87	-0.247866	-0.668983
RPL35	6.47076e-87	0.190951	0.281891
SMCO4	7.18933e-87	-0.232482	-0.537428
PDZD4	9.12958e-87	0.236581	0.798508
UBR7	1.19935e-86	-0.245821	-0.582893
LGI2	1.33125e-86	0.150638	0.991682
GRSF1	2.69119e-86	-0.279709	-0.541893
GM2694	3.22565e-86	-0.295408	-0.683426
DICER1	4.30313e-86	-0.213773	-0.428491
SOX1	7.65657e-86	-0.314042	-0.712339
VAMP8	1.80242e-85	0.189783	0.87034
ZIC1	2.02868e-85	-1.03049	-4.77647
MAGED1	2.12084e-85	-0.231482	-0.437827
PANTR1	2.19347e-85	-0.382285	-2.22217
SEPT2	2.54008e-85	-0.23585	-0.476104
ZDHHC20	3.01104e-85	-0.267036	-0.787473
X9530068E07RIK	3.48765e-85	-0.258657
RPS28	3.89165e-85	0.143686	0.208891
CDON	4.45811e-85	-0.34981	-1.66253
BCL11A	5.5774e-85	0.029125	1.90117
ATP5G1	6.90776e-85	0.157725	0.243574
EGFL7	8.13645e-85	0.296677	0.678073
NRARP	9.78007e-85	-0.376952	-2.21538
SMTNL2	1.23422e-84	0.22597	0.818397
ACTG1	1.57727e-84	0.161331	0.236128
HOXA2	4.29312e-84	-0.825469	-3.77127
DOCK7	5.9011e-84	-0.259051	-0.63663
DHX32	6.6721e-84	-0.263848	-0.900451
HOMER3	8.15278e-84	-0.267325	-0.88626
COPS6	9.7088e-84	0.21968	0.42987
CMAS	1.11983e-83	-0.237369	-0.573822
COX7A2	1.28857e-83	0.124978	0.191022
PTCH1	1.31554e-83	-0.470116	-1.12932
DPYSL5	1.38523e-83	-0.263611	-0.715642
EXOC5	1.45711e-83	-0.266402	-0.688159
PLEKHA2	1.51668e-83	0.0545732	1.4011
SEMA3A	2.56712e-83	-0.527463	-3.51219
IGF2BP3	4.24516e-83	-0.215248	-0.362431
RPL28	4.85545e-83	0.0911813	0.132611
AATF	5.20929e-83	-0.242942	-0.608017
PMAIP1	5.32782e-83	0.0905503	1.15273
VAMP3	5.5645e-83	-0.215951	-0.436356
DNAJA1	6.01089e-83	0.135117	0.204492
CAR14	6.0494e-83	-0.272691	-0.634532
SOX6	9.6038e-83	-0.564271	-3.72166
GM10036	9.81029e-83	-0.207456	-0.351871
RPL41	1.05436e-82	0.11497	0.169447
NDUFA13	1.32738e-82	0.167358	0.286944
GNAI1	1.39967e-82	-0.278475	-1.27129
COQ2	1.51934e-82	-0.244081	-0.714345
FLRT1	1.74906e-82	-0.431531	-2.14886
KDM5B	1.96712e-82	0.218222	0.395483
SYPL	2.6179e-82	-0.239837	-0.599901
NDUFA2	2.72316e-82	0.160006	0.269769
CBX7	3.42186e-82	0.0871293	1.16938
PLAGL2	6.17838e-82	-0.276895	-0.76604
FXYD7	6.21971e-82	0.0437795	1.54166
GM42418	1.01093e-81	0.757452	1.02802
CASD1	1.11632e-81	-0.276336	-0.97411
NFIB	1.11986e-81	0.0426691	1.61946
KDM6B	1.50759e-81	-0.259988	-0.610619
HNRNPR	1.84282e-81	-0.177597	-0.271512
PTPRA	2.07208e-81	-0.240701	-0.637649
SSR3	2.26798e-81	-0.219576	-0.3701
CCDC50	2.36568e-81	-0.221415	-0.382068
SPRY1	3.8541e-81	-0.328146	-1.33517
KDF1	4.69476e-81	0.0307468	1.71314
RNF130	6.83036e-81	-0.249475	-0.664868
TXNDC5	1.20431e-80	-0.223369	-0.469187
YWHAZ	1.37096e-80	-0.194957	-0.289501
ROBO2	1.43097e-80	-0.493874	-2.8719
RSL1D1	2.40984e-80	-0.167883	-0.253524
CSNK1E	2.54422e-80	-0.213684	-0.377721
CASP6	2.69862e-80	0.178362	0.826667
CAR10	3.00644e-80	-0.588929	-3.60638
AGFG1	3.14314e-80	-0.225949	-0.516777
RFLNB	3.19818e-80	-0.292174	-1.0275
LIX1L	3.23693e-80	-0.281958	-1.3644
IER2	4.04336e-80	-0.233881	-0.470999
RHOB	5.88583e-80	-0.286402	-1.20612
GM2000	6.25706e-80	-0.178833	-0.264879
X4933434E20RIK	8.89558e-80	-0.251418
GPRC5C	9.61281e-80	0.198129	0.826036
EEF1AKMT1	1.19495e-79	0.24122	0.470863
TMEM130	1.27706e-79	0.019857	2.07998
PLIN3	1.36625e-79	0.291444	0.657798
PTH1R	1.74802e-79	0.140551	0.981298
PLP1	2.09985e-79	-0.317516	-1.20735
RPS27L	2.33094e-79	0.137067	0.205691
FGF3	3.02441e-79	-0.462006	-2.33072
CALN1	3.60465e-79	0.0938558	1.12214
ANAPC13	3.71821e-79	0.200846	0.396033
SDF2L1	6.49893e-79	-0.230768	-0.4861
APBB1	1.6246e-78	0.231958	0.72238
DNAJA2	1.8042e-78	-0.180158	-0.281375
SHISA2	1.80506e-78	0.18845	0.407032
GREB1L	2.73873e-78	0.35072	0.61252
BRI3	3.54403e-78	0.191519	0.341255
ZIC5	3.88293e-78	0.254874	0.606748
DAZAP2	3.9601e-78	-0.242259	-0.728037
GLS	4.62705e-78	-0.2595	-0.625435
OTUB1	7.25349e-78	-0.207812	-0.403526
HINT1	1.19155e-77	0.135816	0.207895
UBR2	1.27434e-77	0.25077	0.702632
SRCIN1	2.50048e-77	-0.314524	-1.68113
CCNB1IP1	2.73524e-77	0.0473717	1.49991
GLRX	2.95483e-77	-0.294078	-1.04734
TCF7L2	3.06201e-77	-0.293784	-0.618316
SKIDA1	3.56773e-77	-0.270084	-0.826903
COL9A3	3.5931e-77	0.067288	1.19051
CAMTA1	5.74225e-77	-0.219647	-0.487788
ADAMTS8	5.99861e-77	0.014527	2.38129
RPL34	6.38797e-77	0.0968837	0.142791
GAS1	8.1057e-77	-0.29699	-0.694195
URAH	1.23023e-76	0.0667566	1.22289
PDLIM2	1.57881e-76	0.0790044	1.1509
SCAF11	1.65275e-76	-0.196842	-0.287934
SPOCK2	2.01299e-76	0.0379866	1.60966
HIST1H4D	2.60825e-76	0.350009	0.740967
IDI1	3.08732e-76	-0.255109	-0.536519
RTN4RL1	3.09433e-76	0.0415781	1.46782
BCAS2	4.18825e-76	-0.156598	-0.244098
CYP51	5.04152e-76	-0.27802	-0.81043
YWHAH	5.51635e-76	-0.161503	-0.269406
FZD5	7.86282e-76	-0.0261146	-0.324364
PTP4A2	7.89653e-76	-0.216871	-0.343076
GJB3	1.20341e-75	0.0396549	1.5111
BBIP1	1.26164e-75	-0.216354	-0.512358
MYRF	1.78489e-75	0.0785272	1.15356
TMTC2	2.57402e-75	-0.425363	-2.97613
GM10837	2.6285e-75	0.194729	0.824982
GPC6	3.54737e-75	-0.241449	-0.55241
CBX3	1.01037e-74	-0.181322	-0.258738
BCAP29	1.18798e-74	-0.26122	-1.21673
PEX2	1.27436e-74	-0.229537	-0.607324
CNTNAP2	1.78568e-74	-0.31608	-1.28926
GALNT16	2.33283e-74	0.0889046	1.08301
RALY	2.75427e-74	0.164149	0.289262
SF3B2	2.80993e-74	0.149346	0.247213
METTL9	3.65028e-74	-0.171608	-0.268112
GM5786	3.82145e-74	-0.214823	-0.560765
GCAT	4.60827e-74	0.290801	0.602339
SEMA3C	5.20285e-74	-0.434428	-3.02138
IMPA2	6.05965e-74	0.133227	0.915467
BTF3L4	6.87275e-74	-0.177006	-0.294733
GSTM7	6.96275e-74	0.0365589	1.57947
STMN2	8.29624e-74	0.561417	0.621897
POLR2I	8.34812e-74	0.181826	0.347763
GM26669	9.76652e-74	-0.297692	-1.58956
HP1BP3	1.1712e-73	-0.24278	-0.631853
TPBG	1.6921e-73	-0.284683	-0.755824
CTCF	3.21921e-73	0.174555	0.314979
NDNL2	3.33409e-73	-0.206479	-0.423155
MRPS36	3.40085e-73	0.166932	0.311625
FBXO2	3.85862e-73	0.0481093	1.39741
SNRPF	4.77e-73	-0.159118	-0.233882
PCK2	6.85075e-73	0.137216	0.887261
RRAGB	8.11094e-73	-0.263785	-0.751025
TCF3	9.74282e-73	-0.186813	-0.332549
X2310036O22RIK	1.01537e-72	-0.160444
IFT57	1.09574e-72	-0.233938	-0.715323
MSRB1	1.10522e-72	0.215354	0.712346
TMTC4	1.15799e-72	-0.258513	-1.2683
RPS4X	1.1967e-72	-0.0949845	-0.13516
ROBO3	1.2671e-72	0.0347987	1.50902
NES	1.28205e-72	-0.251636	-0.591201
ZDHHC12	1.39414e-72	0.199321	0.747532
GATM	1.40064e-72	-0.26261	-1.38204
NRCAM	1.77774e-72	-0.289968	-1.24205
USP25	1.81892e-72	-0.252975	-0.811141
ARL4C	1.99774e-72	0.316265	0.603895
ZFP985	2.17989e-72	0.0690908	1.16871
ANXA4	2.43735e-72	0.0403918	1.43232
OSTC	3.41639e-72	-0.157998	-0.246227
PREX2	3.59554e-72	-0.26295	-1.24747
GPBP1	4.16759e-72	-0.208348	-0.365378
MIRG	4.49184e-72	0.18223	0.822448
TMEM128	4.89151e-72	-0.213287	-0.466946
RPS8	5.2622e-72	0.0775415	0.114547
TNRC6C	5.82232e-72	0.224018	0.430167
DNAJC21	6.08462e-72	-0.197282	-0.361757
FZD7	1.07768e-71	0.22323	0.735338
WNT5A	1.10789e-71	-0.296356	-1.39385
EFEMP2	1.13395e-71	0.0756758	1.16539
ROCK1	1.1553e-71	0.224238	0.435875
SOCS6	1.16294e-71	-0.228941	-0.582735
CADM1	1.45698e-71	-0.229316	-0.427314
FOXP1	1.71832e-71	-0.248676	-0.565559
ADGRV1	1.96107e-71	-0.271944	-1.15556
TRMT10C	2.36324e-71	-0.217205	-0.493297
VGLL4	2.57847e-71	-0.253007	-0.847782
MAPK8IP2	2.99445e-71	0.130042	0.891791
KBTBD11	3.21349e-71	-0.286264	-1.16181
AGPAT3	3.74898e-71	-0.239438	-0.839739
HDAC6	3.83897e-71	0.313971	0.585437
ARX	4.21465e-71	-1.30725	-6.27759
KIF21A	4.50808e-71	0.35866	0.565887
ACLY	5.17795e-71	-0.217014	-0.421207
CASP3	7.26571e-71	0.223894	0.456213
PSAT1	1.0683e-70	-0.202688	-0.38537
LRMP	1.26119e-70	0.0835543	1.1115
LSR	1.70422e-70	0.297012	0.566587
PLK4	2.25039e-70	0.327981	0.600308
BRE	2.28201e-70	-0.232018	-0.761943
FAM169B	2.3481e-70	0.0142105	2.29956
RPL13-PS3	3.69147e-70	-0.172785	-0.265735
SLC39A6	4.48746e-70	-0.255156	-0.953293
PHC1	4.51276e-70	0.24779	0.640838
UBQLN2	4.92418e-70	-0.210696	-0.386801
NKTR	5.2341e-70	-0.21207	-0.371604
DACH1	6.15719e-70	-0.325572	-2.0822
NDUFA10	6.42908e-70	0.196536	0.395285
NDUFA7	7.01503e-70	0.136925	0.229218
CACYBP	8.57624e-70	-0.152898	-0.228778
RHOF	9.82846e-70	0.0275889	1.73627
LDHA	1.045e-69	-0.0965376	-0.142262
TFG	1.04894e-69	-0.18821	-0.344772
X2700038G22RIK	1.07197e-69	-0.234879
IGFBP3	1.28721e-69	-0.310183	-1.87534
WNT8B	1.35555e-69	-1.06229	-4.50249
TUSC3	1.4989e-69	-0.214779	-0.514154
TMC4	1.80886e-69	0.190769	0.750968
AJAP1	1.84271e-69	-0.273846	-0.997568
UBE2D3	1.84796e-69	-0.146498	-0.210524
TRIM12C	1.92227e-69	0.088837	1.05562
ZMAT2	2.16867e-69	0.153113	0.278104
LAMTOR4	2.18446e-69	0.228724	0.438557
TTYH1	2.29458e-69	0.0697238	1.16246
ZMYND11	2.31006e-69	-0.220626	-0.455876
STARD10	3.50888e-69	0.136871	0.86673
EMILIN2	4.32439e-69	-0.297761	-1.97632
FGF8	5.28077e-69	-0.383114	-1.47694
RAB12	5.71523e-69	-0.228219	-0.66854
SP5	5.71536e-69	0.0648962	0.0384102
CDX1	8.01181e-69	-0.322807	-1.95093
TFDP1	9.02188e-69	-0.191958	-0.333227
JARID2	9.69614e-69	0.313975	0.515179
KDM7A	1.25161e-68	-0.238697	-0.67306
TRIM28	1.79254e-68	0.155369	0.268087
HEG1	1.79254e-68	-0.275092	-1.7221
ATP5E	2.05071e-68	0.135446	0.198249
MS4A4D	3.2272e-68	0.039516	1.45586
EXOSC2	3.93248e-68	0.383648	0.646092
CRIP2	5.39314e-68	0.311037	0.619504
LARS2	8.49676e-68	0.203008	0.795153
TMEM5	9.76598e-68	-0.229127	-0.619124
ETFB	1.0258e-67	-0.199018	-0.371703
FOXG1	1.06591e-67	-1.45399	-6.31139
ABCF1	1.07406e-67	0.161509	0.299029
DOK5	1.19242e-67	-0.298719	-2.29508
CHRNA4	1.37364e-67	0.0494997	1.34402
TOMM5	1.45317e-67	-0.162608	-0.242814
PPM1L	1.83731e-67	-0.258216	-1.1383
GATSL2	1.93586e-67	0.144156	0.843996
MT-ND2	2.10672e-67	0.18724	0.285489
SAV1	2.66044e-67	-0.226814	-0.687368
NFYB	2.81403e-67	0.184439	0.374492
WRB	3.28551e-67	-0.219014	-0.548739
ZMYND8	4.00193e-67	0.332018	0.499599
RPL36A	4.18667e-67	0.0895742	0.131616
NEDD9	4.20126e-67	-0.373425	-2.63493
HINT2	4.8962e-67	0.259042	0.55395
TRAM1	5.04221e-67	-0.207042	-0.449129
ARPC1A	5.31675e-67	-0.164182	-0.271612
POLR1D	9.43346e-67	-0.13759	-0.204646
XPOT	1.74214e-66	-0.222958	-0.529447
PBX2	2.1153e-66	-0.199464	-0.40443
CYP4X1	2.11806e-66	0.136496	0.925108
HOPX	2.25952e-66	-0.0579934	-0.448212
MPC2	2.53823e-66	-0.211523	-0.581604
TMEM30A	2.91308e-66	-0.223805	-0.607403
SPG20	3.1037e-66	-0.233755	-0.705428
FAM178B	3.42793e-66	0.087582	1.01706
EEF1E1	3.50648e-66	-0.196735	-0.37967
GOLT1B	4.02314e-66	-0.21329	-0.502325
DCUN1D5	4.88352e-66	-0.167667	-0.262597
NEBL	5.50167e-66	-0.350939	-2.49548
LETMD1	5.61456e-66	-0.245388	-1.53943
GLIS2	6.3921e-66	-0.23482	-1.22342
RGS2	6.52411e-66	-0.298648	-1.60577
MED30	6.8842e-66	-0.195746	-0.368982
LBH	7.19647e-66	0.0448366	1.33327
CLDN3	7.49116e-66	0.0327589	1.51654
RPS13	9.27521e-66	0.0694098	0.100929
EVL	1.28262e-65	-0.196457	-0.415326
XBP1	1.48117e-65	-0.230041	-0.562335
DACT1	1.82898e-65	0.0436032	1.43331
FKBP4	2.92988e-65	0.127827	0.197877
RFX4	3.02864e-65	0.0755215	0.0417736
USP51	4.13745e-65	-0.246836	-0.732178
NUDC	4.71185e-65	0.141573	0.233946
KLHDC2	4.74631e-65	-0.161023	-0.255325
RGS10	5.16453e-65	0.144103	0.77362
BCL2	5.44584e-65	-0.267382	-1.44304
IMPACT	5.50352e-65	-0.236854	-0.736723
POLR2D	5.65266e-65	-0.164495	-0.279942
PATJ	6.42635e-65	0.0558296	1.18089
DCUN1D1	7.13499e-65	-0.213056	-0.493555
APOPT1	9.00104e-65	-0.195646	-0.415675
TMEM256	9.24166e-65	0.202981	0.392983
ARHGEF15	9.33361e-65	0.0405266	1.43344
SH3GLB1	1.20222e-64	-0.199761	-0.417853
HPN	1.46592e-64	0.0268392	1.67572
GM45009	1.9768e-64	-0.973272	-6.49721
SOX2	2.32017e-64	-0.259837	-0.407207
SMIM22	2.34029e-64	0.0669231	1.11862
PKDCC	2.4422e-64	0.254022	0.490284
ITGB8	2.95862e-64	-0.283199	-1.70056
HIST1H4H	3.69391e-64	0.157949	0.864242
PLAGL1	3.71324e-64	-0.374265	-2.46517
RAP1A	4.43562e-64	-0.184078	-0.324689
MT-CO2	5.03672e-64	0.15467	0.238563
GNB1	6.22233e-64	-0.149705	-0.238548
ARF6	6.55571e-64	-0.19963	-0.434964
SNAI1	6.58279e-64	0.042549	1.36839
DMRT3	7.6642e-64	-0.430668	-3.16936
CNN1	7.83098e-64	0.0317967	1.50444
AZIN1	8.09168e-64	-0.209697	-0.4275
RPL14	8.25965e-64	0.0798233	0.115718
GSTT2	8.79689e-64	0.0978051	0.956729
SIX6	9.78248e-64	-1.61877	-7.31801
SLC25A36	1.07175e-63	-0.236049	-0.70546
JUN	1.12081e-63	-0.259902	-0.940286
GREB1	1.30304e-63	-0.20691	-0.431591
EPHA1	1.56282e-63	0.0569042	0.768734
PPP4C	1.72801e-63	-0.181899	-0.324912
ATP1B2	2.22071e-63	0.0564617	1.24743
TROVE2	2.25579e-63	-0.229291	-0.615795
CASC4	3.34518e-63	-0.22017	-0.623783
RPS12-PS3	3.54517e-63	-0.111127	-0.166547
INPPL1	3.76486e-63	0.213143	0.651093
RUNDC3A	4.97503e-63	0.0811919	0.988414
PPWD1	6.81391e-63	0.27325	0.553753
FEZF2	6.86374e-63	-0.434898	-2.3839
PRKRIR	8.06064e-63	-0.19948	-0.423793
EPB41L3	8.70858e-63	0.126009	0.857636
X1700007K13RIK	8.83623e-63	0.023444
TCEB2	9.43784e-63	0.108527	0.161626
ST14	1.17944e-62	0.0224307	1.80544
CXX1B	1.37267e-62	0.204337	0.71088
SGCE	1.58597e-62	-0.24026	-1.0233
TOP1	1.66739e-62	0.114826	0.175211
MTHFD2L	1.80913e-62	-0.203604	-0.46237
EFCAB6	1.91504e-62	0.0279372	1.60283
DTX1	2.00669e-62	0.0423607	1.34051
CNIH4	2.14225e-62	-0.170006	-0.265318
ZHX1	2.14225e-62	-0.244576	-0.961374
MED21	2.18815e-62	-0.176517	-0.329975
B4GALT6	2.21735e-62	-0.240273	-1.27078
ORC6	2.9925e-62	-0.179881	-0.290211
GM27032	3.25842e-62	-0.256061	-1.28402
ATR	3.28486e-62	-0.231965	-0.653337
SHF	3.34139e-62	-0.222835	-0.874587
FOXD4	3.96208e-62	-0.380139	-1.42532
POU3F1	4.28391e-62	0.45179	0.565753
TVP23B	4.41754e-62	-0.203092	-0.535433
GPX1	4.49439e-62	0.147106	0.257235
PTP4A1	4.63908e-62	-0.190533	-0.329791
BMYC	4.76219e-62	-0.187296	-0.374411
SLC7A3	5.40138e-62	0.0985677	0.662369
COL1A2	5.83771e-62	-0.319585	-2.11426
RPS23	6.15171e-62	0.0657036	0.0924717
MSRB2	7.03366e-62	0.0616842	1.14248
RPL27-PS3	1.37397e-61	-0.1495	-0.231773
EOMES	1.40849e-61	0.00741644	2.60571
GJA1	1.41745e-61	-0.195323	-0.298801
RDH10	1.97659e-61	-0.260919	-1.28294
ADAMTS15	2.2966e-61	0.0295338	1.64566
SAMD1	2.71329e-61	-0.211265	-0.473164
RPS14	3.7337e-61	0.0703351	0.102617
RPL8	4.17449e-61	0.0829939	0.117706
HIST1H2AE	4.21301e-61	0.406996	0.690676
H2-KE6	4.32793e-61	-0.216318	-0.564152
ZSWIM6	4.74855e-61	-0.233181	-0.674902
TDRKH	4.81689e-61	-0.232276	-0.947607
PRMT7	4.94671e-61	-0.180444	-0.366168
TUBB4A	5.02248e-61	0.207601	0.660315
PLPP3	6.13972e-61	0.206358	0.716197
GOLGA7	7.44141e-61	-0.181735	-0.367355
CUL1	7.54922e-61	-0.166541	-0.25359
IKZF2	8.54413e-61	-0.248886	-0.928258
MT-ND4	9.30371e-61	0.176835	0.271004
CDC7	9.49449e-61	-0.213965	-0.597087
FBXL14	9.74531e-61	-0.207791	-0.533199
NDUFB7	1.06423e-60	0.14561	0.262876
BTF3	1.18074e-60	-0.0921584	-0.138246
SULF2	1.39504e-60	-0.225361	-0.681689
RPS25	1.5626e-60	0.0869615	0.127222
DUSP5	2.186e-60	-0.257752	-1.06402
MT-ND5	2.59336e-60	0.177009	0.291933
TFE3	2.6953e-60	0.194036	0.691137
PJA1	2.8398e-60	-0.19799	-0.403325
X1700123O20RIK	3.04567e-60	-0.171601
PLCH1	3.34071e-60	-0.225221	-0.677985
BCAT2	3.45885e-60	0.214358	0.629039
SPR	3.96769e-60	0.235464	0.509327
SCOC	3.98541e-60	-0.189975	-0.358576
RARB	4.25552e-60	-0.358986	-2.85707
PODXL	4.67814e-60	0.258092	0.615534
CTBP1	5.75026e-60	-0.162276	-0.265011
ARF1	6.90137e-60	-0.135085	-0.215016
FZD10	7.12821e-60	-0.259735	-1.21773
GM26700	7.90988e-60	-0.473036	-4.12072
PTBP2	8.47841e-60	-0.195076	-0.386408
RHEB	9.62002e-60	-0.166835	-0.261173
PPT1	1.01782e-59	-0.223508	-0.707506
MRGBP	1.21745e-59	-0.212832	-0.634609
SALL1	1.33727e-59	0.242318	0.588887
UNC50	1.435e-59	-0.189053	-0.414134
DESI2	1.59034e-59	-0.19018	-0.417699
DNAJC24	1.67851e-59	-0.18406	-0.392679
HMCN1	1.81061e-59	0.0709115	1.08626
PPP1CB	1.87691e-59	-0.192569	-0.355273
NPTN	2.02626e-59	-0.205743	-0.575813
ZMAT4	2.0892e-59	0.0447822	1.33498
ERP29	2.49542e-59	-0.163832	-0.265887
DND1	2.53067e-59	0.049832	1.31573
WFIKKN1	2.57828e-59	-0.328859	-2.84295
DGCR6	2.63526e-59	-0.167311	-0.28522
APPL1	3.05826e-59	-0.203475	-0.463796
HSPG2	3.99482e-59	0.0680689	1.00718
MTCH1	4.32266e-59	-0.16313	-0.268481
KLHL9	4.37982e-59	-0.204193	-0.455513
ARL6IP6	4.65754e-59	-0.195415	-0.364021
DMRTA2	4.92256e-59	-0.392018	-2.59113
RCN2	5.4304e-59	-0.18332	-0.30254
MBIP	5.91983e-59	-0.207094	-0.591119
AMER2	6.11409e-59	-0.226579	-1.20531
RBM38	8.51079e-59	-0.214492	-0.699762
PHACTR2	1.02274e-58	-0.234493	-1.26503
IGF2BP2	1.09755e-58	-0.185423	-0.307781
CNN3	1.13253e-58	-0.162993	-0.252584
NAA50	1.14176e-58	-0.166325	-0.256495
LRP8	1.14176e-58	-0.249511	-1.70733
SCUBE2	1.36419e-58	-0.284708	-1.37937
GM12408	1.48218e-58	0.003918	3.3847
TIPARP	2.05522e-58	-0.218934	-0.706377
HMGB2	2.21476e-58	0.112953	0.166314
PPP1CA	2.40446e-58	0.118364	0.189132
ARL1	2.55456e-58	-0.157554	-0.242143
RBBP7	2.65783e-58	-0.168225	-0.256975
SNX30	3.12321e-58	-0.227828	-0.958279
GM266	3.28399e-58	-0.251008	-1.76514
PJA2	3.61991e-58	-0.214486	-0.633157
NFATC4	3.9948e-58	0.0840553	0.91555
SF3B6	4.93478e-58	-0.133169	-0.199049
RBM15	6.65379e-58	-0.220777	-0.576637
GRRP1	6.974e-58	0.175585	0.72513
KIRREL	9.53368e-58	-0.228589	-1.03185
GM20604	1.0129e-57	-0.207091	-0.699731
CDC26	1.22892e-57	-0.152854	-0.237615
EID1	1.2593e-57	-0.164046	-0.252977
IL6ST	1.27508e-57	-0.220361	-0.883173
MAGEL2	1.67001e-57	-0.250338	-1.52905
COX6A1	1.70072e-57	0.144447	0.264834
CBS	2.02938e-57	0.0752617	1.01633
MTA1	2.0346e-57	-0.169395	-0.287544
RPSA	2.22501e-57	-0.0708026	-0.0993965
UTF1	2.28967e-57	0.0474655	0.914195
DTNA	2.61798e-57	-0.278009	-2.26665
DUT	2.85545e-57	0.128624	0.204512
TMEM163	3.80658e-57	0.0682742	1.03045
DSG2	4.89766e-57	0.0549113	1.10786
PRRC2B	5.41006e-57	-0.196186	-0.42897
LEPROTL1	5.67043e-57	-0.188104	-0.440853
LSAMP	7.08143e-57	-0.2398	-1.55021
MEX3D	8.59236e-57	-0.200362	-0.577539
MRPL50	1.02345e-56	-0.175036	-0.345929
HCN4	1.03673e-56	0.024827	1.70527
ZFP521	1.18971e-56	-0.212256	-0.748696
TAF7	1.3293e-56	0.188954	0.378547
HNRNPK	1.61569e-56	-0.112545	-0.165511
CALCA	1.79902e-56	0.079988	0.310402
SOS2	2.30859e-56	-0.219217	-1.16201
RANGRF	2.92801e-56	0.207187	0.412496
USP1	3.13629e-56	-0.18323	-0.310423
SIGMAR1	3.25736e-56	-0.179294	-0.317075
TMEM33	3.33604e-56	-0.182246	-0.386296
PRR7	3.66415e-56	-0.208979	-0.509185
DKK1	3.89382e-56	-0.448687	-1.62667
NUAK2	4.24169e-56	-0.229192	-0.731356
KRTCAP2	5.27192e-56	0.138574	0.236701
PTP4A3	5.41284e-56	-0.203218	-0.860933
VBP1	6.13368e-56	0.180448	0.374416
UNC5B	7.07237e-56	0.0650238	1.04509
BAZ2A	7.09205e-56	0.233388	0.497237
ZFHX3	7.52281e-56	-0.244057	-0.699138
QPRT	8.07502e-56	0.174188	0.662442
SMAD1	8.07502e-56	-0.216889	-0.607753
FAM173A	8.14655e-56	0.220634	0.536421
MTA3	1.14533e-55	0.175948	0.648757
NOC2L	1.55005e-55	-0.177643	-0.347529
USP46	1.64645e-55	-0.204396	-0.575929
UBE2D2A	1.74682e-55	-0.137615	-0.223374
IL17RA	1.83715e-55	0.0536093	1.22111
VANGL2	1.93597e-55	-0.187409	-0.370654
PIR	1.982e-55	0.1425	0.736026
TNFAIP1	2.05567e-55	-0.191912	-0.462814
NCL	2.17614e-55	0.142898	0.202517
UBE2J2	2.18752e-55	-0.163406	-0.293347
AGPAT5	2.3836e-55	-0.179964	-0.357639
RNH1	2.44889e-55	0.209017	0.592555
RPS6KA3	2.72025e-55	-0.202422	-0.781758
CLASP1	2.88187e-55	-0.204244	-0.488066
H2-D1	3.13102e-55	-0.218687	-0.597468
TMED7	3.23117e-55	-0.185919	-0.387125
FYTTD1	3.91971e-55	-0.180071	-0.347997
PCDH8	4.1052e-55	-0.327766	-2.12277
PSMD4	6.06185e-55	0.138664	0.249257
ZFP280C	7.02805e-55	-0.213286	-0.562931
CRK	7.35521e-55	-0.193537	-0.418622
MAPK3	8.07092e-55	0.210217	0.44528
ZFP36L3	8.13912e-55	0.0150011	2.04294
GCSH	9.18972e-55	-0.162447	-0.262888
SNAPC5	1.04808e-54	0.198085	0.432074
CHSY1	1.09896e-54	-0.212892	-0.695146
MSMO1	1.22604e-54	-0.23423	-0.698442
EPB41L4AOS	1.23734e-54	0.217923	0.423484
DUSP6	1.24809e-54	-0.285053	-1.64202
CETN3	1.3669e-54	-0.158004	-0.243868
WBP5	1.58298e-54	0.141009	0.229888
MAT2B	1.73578e-54	-0.184875	-0.394973
ITPK1	1.86116e-54	0.129858	0.771661
FMN2	2.0641e-54	-0.223356	-1.30815
BAX	2.33781e-54	0.124689	0.21188
VANGL1	2.5284e-54	-0.262564	-1.5881
BACH2	2.63977e-54	-0.22109	-1.43322
CHCHD4	3.09434e-54	-0.17906	-0.325142
UBXN1	3.32241e-54	-0.12944	-0.191459
GSTK1	5.2325e-54	0.049549	1.18095
RIIAD1	5.4444e-54	0.0212633	1.80151
LCORL	7.02132e-54	-0.227538	-0.75241
EMID1	7.98273e-54	-0.211152	-1.19707
RPLP2	8.68844e-54	0.07011	0.100979
WTIP	8.801e-54	-0.185178	-0.410353
IGDCC4	9.1493e-54	0.0337746	1.48487
POU3F3	1.10936e-53	-0.326942	-2.5877
LOCKD	1.18255e-53	0.128593	0.748748
AP1M1	1.23741e-53	-0.193503	-0.531373
STAP2	1.26128e-53	0.0748751	0.952182
LETM1	1.26761e-53	0.228305	0.520168
CNPY2	1.41387e-53	0.161476	0.322976
EFNB1	1.63786e-53	-0.235597	-0.580513
ETV5	1.69769e-53	-0.248147	-1.44315
ACKR3	1.82632e-53	-0.253399	-1.91207
SEPT11	2.04187e-53	-0.184747	-0.295238
CCDC34	2.35967e-53	0.155294	0.294242
GSTM5	2.80211e-53	-0.190321	-0.340783
CPSF6	3.15205e-53	-0.16641	-0.244178
LIN28B	3.27776e-53	-0.194249	-0.373783
NAT8L	3.56257e-53	-0.204646	-1.33614
HBB-Y	3.83134e-53		-25.2496
APPBP2	4.5745e-53	-0.179196	-0.35875
CENPW	4.71688e-53	0.162244	0.329212
ACOT9	4.91083e-53	0.0817838	0.891929
SNX1	4.97661e-53	-0.188927	-0.510903
AP1AR	5.40587e-53	-0.179481	-0.378637
GM973	5.63636e-53	0.0109645	2.33613
PRKAR2B	5.63636e-53	-0.202573	-0.53859
LZIC	5.9827e-53	-0.181163	-0.556507
CGGBP1	6.21235e-53	-0.181364	-0.341083
TLK1	6.30399e-53	-0.176989	-0.320339
ADAMTS9	6.36444e-53	-0.220767	-1.18839
PET100	7.18461e-53	0.244064	0.473804
CACHD1	7.81506e-53	-0.219443	-0.586583
MN1	8.28015e-53	-0.230221	-0.795409
ZBED3	8.38098e-53	-0.204187	-0.855459
DLK1	1.06317e-52	-0.266275	-1.3069
SCD2	1.21817e-52	-0.187357	-0.282461
SHROOM3	1.23331e-52	-0.203258	-0.763665
AXIN2	1.28336e-52	-0.14186	-0.435316
CLPTM1L	1.32437e-52	-0.194699	-0.545029
PMF1	1.3984e-52	0.170703	0.36518
SFRP5	1.40511e-52	0.0519537	0.921178
APBA2	1.49285e-52	-0.213297	-0.744549
MYH9	1.49402e-52	0.264479	0.519396
RCN3	1.70216e-52	0.224324	0.574279
TRIM25	1.71003e-52	0.0841888	0.886449
CACNG8	1.89535e-52	0.0619093	1.01371
EBNA1BP2	2.18383e-52	-0.151719	-0.214303
PLCXD1	2.2434e-52	0.035327	1.3497
MINPP1	2.32122e-52	-0.174541	-0.365793
FAM172A	2.36091e-52	-0.207855	-0.826878
CNOT7	2.71421e-52	-0.176539	-0.389568
MAT2A	2.75921e-52	-0.149825	-0.211061
H2AFV	3.36767e-52	-0.109575	-0.161642
RABAC1	3.89483e-52	0.201298	0.538662
CLEC2L	3.90316e-52	-0.272718	-2.009
IFRD1	3.94307e-52	-0.206048	-0.449563
TFAP2A	4.28991e-52	0.0641719	1.24072
CDH6	4.83289e-52	-0.262318	-2.32538
SMIM1	4.90678e-52	0.0863148	0.887792
PIN4	5.37297e-52	0.154027	0.314967
OST4	5.62791e-52	-0.150339	-0.217572
MYCBP2	5.85516e-52	-0.191186	-0.392813
GIPC1	7.35079e-52	-0.178443	-0.391567
TPRGL	7.47714e-52	0.202683	0.436537
FAM181A	7.56276e-52	-0.238758	-1.58206
PPP3R1	7.66023e-52	-0.189312	-0.530054
SDCBP	8.02546e-52	-0.177359	-0.395342
FAM174A	8.34293e-52	-0.194026	-0.616357
SMAD3	8.77818e-52	-0.208087	-1.15879
H2AFJ	1.00262e-51	0.16443	0.324536
DFNA5	1.0813e-51	-0.188459	-0.541089
FNDC3B	1.35291e-51	-0.220553	-1.09117
ACP6	1.63037e-51	0.158009	0.67224
ABCB6	1.63916e-51	0.0813903	0.919857
PLXNA2	1.85134e-51	-0.257371	-0.948081
ARHGAP10	1.94338e-51	0.139817	0.702386
KRIT1	2.02194e-51	-0.188385	-0.394685
ID2	2.0631e-51	-0.0637155	-0.206755
EIF1B	2.16564e-51	-0.136637	-0.219842
TMCC1	2.19107e-51	-0.206146	-0.669737
EI24	2.32453e-51	-0.177025	-0.394493
RFX7	2.34668e-51	-0.191952	-0.458058
FAAP20	2.98206e-51	-0.167372	-0.335665
PLA2G12A	3.03488e-51	0.231196	0.467089
ARMCX3	3.06945e-51	-0.184575	-0.521176
TRIM54	3.62989e-51	0.053908	1.10893
TXNDC17	4.00865e-51	0.128467	0.221847
CEP170B	4.45921e-51	0.0760797	0.877731
CDC42	4.73364e-51	-0.123507	-0.194803
HSD17B12	4.83145e-51	-0.168327	-0.309523
CTPS2	5.45032e-51	0.0938094	0.774655
SOX12	5.55793e-51	-0.180861	-0.409246
GOLM1	5.67241e-51	-0.174554	-0.300432
ECHDC1	6.13506e-51	-0.195191	-0.633514
MRPL28	7.95752e-51	0.138262	0.256427
TULP4	9.07183e-51	-0.196731	-0.488049
ANP32A	1.04519e-50	0.103902	0.15884
TMEM108	1.11744e-50	-0.197664	-0.608856
BCL2L11	1.19652e-50	-0.20112	-0.512814
ERO1L	1.21066e-50	-0.197374	-0.58005
NXN	1.45048e-50	-0.201575	-0.504047
ZFP318	1.50787e-50	-0.205434	-0.502891
SEPT10	1.52166e-50	-0.199862	-0.671676
HS2ST1	1.99594e-50	-0.179756	-0.417172
PAPSS1	2.03848e-50	-0.17947	-0.421767
ADGRB2	2.05173e-50	0.0580735	0.984034
VEGFC	2.20872e-50	-0.267169	-2.33746
RASSF2	2.31338e-50	-0.206991	-1.26973
E130308A19RIK	2.39372e-50	-0.194318	-0.53872
ZIC2	2.56245e-50	0.280084	0.509355
RHNO1	2.82256e-50	-0.166991	-0.320826
ICK	2.84471e-50	-0.193084	-0.577089
MED6	3.16499e-50	-0.175577	-0.422163
MTPN	3.16792e-50	-0.161935	-0.275745
RAPH1	3.28731e-50	-0.196474	-0.484905
FABP7	3.30237e-50	-0.128631	-0.660146
RFX3	3.34844e-50	-0.191494	-0.638681
ASAP1	3.63429e-50	-0.184036	-0.456623
PIK3R1	3.7453e-50	-0.201752	-1.07234
MAX	3.77176e-50	-0.180164	-0.431117
HIGD1A	3.79262e-50	-0.138084	-0.199303
SNHG20	3.96813e-50	-0.187234	-0.398084
CTGF	3.96975e-50	-0.295037	-2.45301
PRDX3	4.1321e-50	-0.181116	-0.438753
GM26767	4.21104e-50	0.193104	0.77438
SYNE4	4.49185e-50	0.0614948	0.967491
GPD2	4.86793e-50	-0.204612	-0.612463
MFSD14A	5.15096e-50	-0.189303	-0.509707
R3HDM1	5.6699e-50	-0.179143	-0.323148
ALDH1A2	6.68962e-50	0.000112628	-0.230769
GPC4	7.79472e-50	0.0742915	0.733277
AP1S1	9.2539e-50	-0.172582	-0.377932
AI314180	9.57582e-50	-0.192811	-0.449417
DPYSL4	1.08758e-49	-0.209085	-1.19875
VARS	1.11258e-49	-0.162896	-0.276055
OLFML3	1.14231e-49	-0.233341	-1.65728
EIF3E	1.39531e-49	-0.120749	-0.175309
VPS26A	1.40105e-49	-0.174715	-0.506296
EFNB3	1.51679e-49	-0.195989	-0.706195
CD302	1.60574e-49	-0.193777	-0.848215
LSM2	1.85738e-49	-0.121429	-0.177988
STAT6	2.11896e-49	0.0587713	0.959594
BTG1	2.14447e-49	-0.206257	-0.546764
SCLT1	2.19546e-49	-0.18909	-0.468832
ZFP397	2.33418e-49	-0.184019	-0.500523
SMIM19	2.6871e-49	-0.189885	-0.684865
EML5	2.6895e-49	-0.200055	-1.15234
CFAP20	2.69929e-49	-0.151368	-0.252472
SNX3	3.05286e-49	0.149424	0.309621
IFITM3	3.34557e-49	0.216763	0.583426
SNX10	3.72344e-49	-0.188084	-0.476046
AKAP11	3.89863e-49	-0.203022	-0.570408
MAFG	3.98022e-49	-0.185262	-0.430603
NHSL1	5.25846e-49	-0.199151	-1.029
LYRM9	5.42555e-49	-0.190809	-0.914927
RHBDL3	5.50292e-49	0.0231819	1.54339
PDE10A	5.59138e-49	-0.218498	-1.92348
AUTS2	6.00262e-49	0.305967	0.433695
PCED1B	7.31133e-49	0.0384044	1.23034
SPATS2	8.1092e-49	-0.171248	-0.321528
MPI	8.32303e-49	0.160922	0.621196
UBN2	8.76575e-49	-0.168335	-0.289422
SIVA1	1.0271e-48	0.117204	0.185534
HNRNPA1	1.1072e-48	-0.0853769	-0.126438
SKAP2	1.11053e-48	-0.193232	-0.748667
GM3550	1.19137e-48	-0.155252	-0.414597
MXI1	1.3066e-48	-0.188511	-0.702548
YPEL3	1.3594e-48	0.149604	0.6721
CASP8AP2	1.37246e-48	-0.181473	-0.321834
CDK14	1.44446e-48	-0.198885	-0.733668
STIM1	1.62915e-48	0.0877115	0.82808
LYPLA1	1.69071e-48	-0.187331	-0.486705
ARF5	1.76992e-48	-0.145102	-0.240939
CTNND2	1.87452e-48	-0.204866	-1.59239
SCPEP1	1.87529e-48	-0.189791	-0.687345
RPS10	1.88778e-48	-0.0583925	-0.0835491
ENSA	2.05477e-48	-0.177696	-0.405344
CAPSL	2.07759e-48	0.038504	1.11749
ARL6IP5	2.21515e-48	0.148425	0.645655
NSMAF	2.35835e-48	-0.189879	-0.687662
UHRF2	3.20464e-48	-0.166313	-0.280697
ZC3H12C	3.41343e-48	-0.214646	-1.72216
SIKE1	3.79604e-48	-0.170092	-0.380366
DNAJC8	4.02576e-48	0.11878	0.207506
COL11A1	4.49131e-48	-0.218662	-1.68315
FAM64A	4.49957e-48	-0.171159	-0.330244
JADE1	4.57739e-48	-0.17107	-0.410349
ELOVL2	4.71909e-48	-0.201985	-0.931598
GPM6B	4.96098e-48	-0.25989	-2.37721
NPL	4.97635e-48	-0.194813	-1.21372
PSME1	5.26445e-48	0.205254	0.425109
PPP1R14B	5.81883e-48	0.0976488	0.150916
EWSR1	5.89537e-48	-0.144815	-0.21158
PDCD2	6.13318e-48	-0.149223	-0.288596
CAR4	6.45526e-48	0.16918	0.182352
D030056L22RIK	6.95864e-48	-0.170742	-0.356075
POU3F4	9.8763e-48	-0.305748	-2.46209
PPP1R1A	1.00796e-47	0.246516	0.500313
BC024139	1.02217e-47	-0.415959	-4.02884
SF3B4	1.2257e-47	-0.148292	-0.238897
RBPJ	1.22768e-47	-0.178221	-0.397898
NIPSNAP3B	1.2502e-47	-0.16973	-0.380802
VGLL3	1.25576e-47	-0.584886	-2.84634
PLAT	1.40806e-47	-0.245153	-1.71327
ABLIM1	1.50119e-47	-0.188846	-0.62344
LINGO1	1.60355e-47	0.0510846	1.09094
MFAP4	1.69156e-47	0.0681768	0.960477
GOLIM4	1.72908e-47	-0.183821	-0.416638
CEP78	1.80445e-47	-0.179843	-0.435499
CNOT6	1.83096e-47	-0.176155	-0.381927
CIAPIN1	1.86311e-47	0.148831	0.305124
MIA2	2.03404e-47	-0.178248	-0.363362
MAOB	2.44757e-47	-0.209187	-1.59332
CBR1	2.87364e-47	0.22134	0.46056
ERGIC2	3.01778e-47	-0.15053	-0.25287
ATP11A	3.14335e-47	-0.189949	-1.1658
PTPRN2	3.59522e-47	-0.204101	-1.62036
SREK1	3.62299e-47	-0.153296	-0.246389
DPPA5A	3.80985e-47	0.0245957	1.50326
NT5C3	3.93254e-47	-0.172353	-0.521786
ITPR3	4.07713e-47	0.0265383	1.47247
NDFIP2	4.31702e-47	-0.180046	-0.486128
TIA1	4.37343e-47	-0.167105	-0.292637
MAPK13	4.38195e-47	0.0478651	0.887435
SLC2A1	4.90096e-47	0.208432	0.339226
ERDR1	4.90361e-47	-0.171494	-0.251245
TESC	4.92879e-47	0.0377195	1.20788
MCC	5.05015e-47	-0.24444	-1.89656
PLEKHA1	5.16823e-47	-0.190448	-0.397695
CEP55	5.66136e-47	-0.193276	-0.780118
WNT1	6.36616e-47	-0.0579262	-0.637623
SNTA1	6.63704e-47	0.0400599	1.17406
TSHZ3	6.72839e-47	-0.23136	-1.95983
ST8SIA4	6.82064e-47	-0.452519	-3.84164
ARL2BP	6.82079e-47	-0.163486	-0.326197
IMPAD1	9.10744e-47	-0.181557	-0.36068
MARCH5	9.59518e-47	-0.140877	-0.231779
LAG3	1.00239e-46	0.0319039	1.33963
ATP6V0E2	1.01034e-46	-0.18137	-1.09941
FSD1L	1.01801e-46	-0.196555	-0.726598
CD164L2	1.21679e-46	0.0181277	1.73709
KDM3A	1.22632e-46	-0.198731	-0.552086
RNF138	1.3219e-46	-0.170486	-0.368281
CAMKV	1.33502e-46	0.126239	0.708312
UBE2E2	1.37562e-46	-0.18534	-0.689847
TMEM258	1.4315e-46	0.124781	0.190648
APRT	1.46147e-46	-0.122298	-0.1785
TXNDC15	1.46147e-46	-0.181097	-0.485718
PEX13	1.47135e-46	-0.180869	-0.465754
SYCP3	1.64404e-46	0.0220779	1.53718
NUDCD2	1.96279e-46	-0.132072	-0.190567
MLLT11	1.96939e-46	-0.189274	-0.733326
SLC25A39	2.02081e-46	0.165446	0.36083
LFNG	2.13397e-46	-0.20581	-0.931965
CELSR2	2.87553e-46	-0.176828	-0.498783
TIMP1	2.97258e-46	0.0733616	0.874805
HBA-X	3.06546e-46		-25.0786
FLNC	3.30734e-46	0.0868228	0.784054
RNF2	3.30734e-46	-0.165324	-0.36802
ANXA2	3.62015e-46	0.0646378	0.923039
EBF1	4.03802e-46	0.102794	0.499792
RASA3	4.34591e-46	-0.193363	-1.53241
PLCB3	4.35021e-46	0.114068	0.73017
DYRK3	4.37829e-46	-0.171512	-0.522841
TOR2A	4.56298e-46	-0.179558	-0.523832
SCD1	4.72733e-46	-0.193612	-0.842738
QDPR	5.74917e-46	-0.165125	-0.374208
BARHL2	6.43271e-46	-1.09892	-6.88683
GM3453	6.70135e-46	-0.227727	-2.12226
PSAP	7.10887e-46	0.20818	0.504952
BRI3BP	8.54485e-46	-0.161223	-0.32733
IGF1R	8.65185e-46	-0.198307	-0.416563
RB1	9.04945e-46	-0.185362	-1.01516
EIF2S2	9.35061e-46	0.102929	0.161021
NR2E1	9.43579e-46	-0.752404	-5.85822
CTSZ	9.59029e-46	-0.150885	-0.246506
TXN2	1.05808e-45	-0.144471	-0.234353
AURKAIP1	1.14619e-45	0.153207	0.317928
VAPA	1.198e-45	-0.12287	-0.187842
PRELID2	1.26341e-45	-0.180451	-0.403111
ITM2B	1.27652e-45	0.231569	0.464107
MSX3	1.37707e-45	-0.37405	-2.21977
NDUFA11	1.53228e-45	0.12766	0.226004
NAV2	1.62902e-45	0.162558	0.303534
ADD1	1.70517e-45	-0.183336	-0.479864
BST2	1.76277e-45	0.170019	0.611748
CBY1	1.77211e-45	0.173506	0.397923
CLPB	1.84765e-45	0.193848	0.527845
D630045J12RIK	2.01397e-45	-0.184095	-1.21633
ADA	2.06745e-45	-0.212294	-1.83444
ZADH2	2.17977e-45	-0.204779	-1.659
FAM96A	2.19886e-45	-0.154138	-0.283843
SAR1B	2.66447e-45	-0.151952	-0.272454
ACTR10	2.68074e-45	-0.159684	-0.33384
ZFP580	2.79481e-45	-0.17611	-0.637105
PTTG1	2.90588e-45	0.202269	0.368047
LSM1	2.92448e-45	-0.142745	-0.233432
USMG5	3.10318e-45	0.130626	0.218604
EID2	3.19228e-45	-0.173121	-0.40503
CAMK1	3.19986e-45	-0.172564	-0.788656
H2AFZ	3.20216e-45	-0.0752647	-0.105802
TPM1	3.41558e-45	0.211411	0.375697
URI1	3.4826e-45	-0.164043	-0.319846
HRAS	3.52863e-45	0.13404	0.25107
ACADM	3.60427e-45	0.206107	0.503229
ITGA6	3.84126e-45	-0.183829	-0.522316
SNHG6	3.85182e-45	-0.159016	-0.296668
HMGA1-RS1	3.98528e-45	0.232058	0.46011
RAP2A	4.45148e-45	-0.172302	-0.482922
NECAB2	4.69709e-45	-0.18499	-0.949268
DLGAP3	4.83094e-45	0.0334947	1.23377
GM30340	4.85871e-45	-0.639961	-7.19695
EMX2	5.05428e-45	-0.306988	-1.73412
GM10260	5.08577e-45	0.149457	0.224236
TMEM51	5.27397e-45	0.043783	1.11886
FILIP1	5.93449e-45	-0.668691	-5.43129
PCYT1B	6.65523e-45	0.0514105	0.91425
ARGLU1	7.1965e-45	-0.126732	-0.180561
RABGGTB	7.49455e-45	-0.161668	-0.292035
STT3A	7.96502e-45	-0.171806	-0.396828
RPL24	7.96746e-45	0.0575131	0.0853951
GM26735	8.26881e-45	-0.186529	-0.736724
CADM4	9.17053e-45	-0.203203	-2.04854
GID8	9.1908e-45	-0.169466	-0.454479
DZIP3	9.37853e-45	-0.185548	-0.48367
MAPK1IP1L	9.944e-45	-0.164378	-0.295691
PABPC4	1.05267e-44	-0.16771	-0.331163
UBL3	1.17255e-44	-0.194081	-0.543785
SOX5	1.25269e-44	-0.209291	-1.16686
RSPH1	1.3509e-44	0.0798665	0.847733
ZFYVE9	1.39677e-44	-0.184956	-0.545622
NIP7	1.59474e-44	-0.144094	-0.240114
FAM171B	1.60799e-44	-0.197152	-0.841596
CISD2	1.63819e-44	-0.142234	-0.212894
LDHC	1.71883e-44	0.0298346	1.28042
ZFP91	1.75492e-44	-0.13964	-0.239503
BNIP3	1.7554e-44	-0.181244	-0.29778
NUP210	1.92487e-44	-0.172174	-0.680116
NDUFB2	1.94644e-44	0.192869	0.395313
WSB1	1.98567e-44	-0.169334	-0.384488
TUBA1B	2.30244e-44	-0.110499	-0.167903
FAM129B	2.48737e-44	0.0627522	0.948605
TET3	2.71353e-44	-0.175032	-0.41796
PRKRA	2.913e-44	-0.159333	-0.299986
NAE1	2.97153e-44	-0.151618	-0.259928
RP9	3.52723e-44	0.211142	0.499454
ILKAP	4.25323e-44	-0.139486	-0.237269
TMEM82	4.35925e-44	0.0481192	1.04282
RFC1	5.10168e-44	0.134952	0.262843
TIPRL	5.29226e-44	-0.15314	-0.297007
TCF4	5.43956e-44	-0.168764	-0.289043
MAP1B	5.87435e-44	-0.174666	-0.258969
NHP2L1	5.93714e-44	-0.0974369	-0.146419
TSEN34	6.19559e-44	-0.14572	-0.251868
X2700081O15RIK	7.28442e-44	-0.186207
HSPA13	7.96109e-44	-0.172491	-0.528527
ACOT7	8.24086e-44	-0.180322	-0.518731
ARL5B	8.24347e-44	-0.183113	-0.530673
AARD	8.6088e-44	-0.194151	-1.35157
TSFM	8.9422e-44	-0.149698	-0.275917
RHOA	9.0069e-44	-0.114734	-0.169211
SMARCD2	9.11743e-44	0.123903	0.668905
CNIH1	9.72202e-44	-0.140438	-0.239553
RANGAP1	9.96668e-44	0.170334	0.32918
PRRX2	1.07111e-43	-0.184974	-0.704679
MARCKS	1.13151e-43	0.147254	0.259024
COL2A1	1.22951e-43	-0.16895	-0.483015
RSU1	1.51988e-43	-0.152372	-0.369094
FYN	1.53012e-43	-0.165416	-0.429664
ZSWIM5	1.53073e-43	-0.174051	-1.09927
NCK2	1.54047e-43	-0.176113	-1.0134
MCMBP	1.56516e-43	-0.159396	-0.292664
YDJC	1.57079e-43	0.123878	0.640001
SSR1	1.61516e-43	-0.161953	-0.323046
SPAST	1.72807e-43	-0.165485	-0.35736
RBM17	1.83475e-43	-0.129173	-0.184978
MT-CYTB	1.94532e-43	0.149172	0.232496
MARK3	1.95036e-43	-0.161891	-0.324853
FAIM	2.17147e-43	-0.161712	-0.381119
NOVA1	2.27842e-43	-0.178498	-1.28751
PTPRS	2.4626e-43	-0.181908	-0.439924
TBL1XR1	2.68422e-43	-0.175363	-0.48825
ECHS1	2.82576e-43	0.163773	0.348852
TSHZ2	2.86607e-43	-0.199953	-1.37163
FZD4	3.37443e-43	-0.216239	-1.5519
GM12166	3.82913e-43	-0.177345	-0.743044
TSACC	4.30973e-43	0.0891859	0.786908
APOA1	5.38089e-43	0.0460209	1.24236
TSC22D3	5.52701e-43	-0.169501	-0.520175
ACACA	5.62426e-43	-0.173966	-0.46027
G3BP1	5.66803e-43	-0.120892	-0.183476
INA	6.22154e-43	0.18077	0.355367
FKBP8	6.61024e-43	0.159349	0.332798
FZD1	6.7003e-43	-0.187609	-1.66445
FBXO44	7.28855e-43	0.114137	0.671042
PLOD2	7.3654e-43	-0.188062	-0.437452
KMT5C	8.21615e-43	0.1446	0.615734
AGPAT2	8.68197e-43	0.0840746	0.788678
NNT	8.76568e-43	0.178803	0.550267
DGKA	8.82623e-43	0.02764	1.26434
GLUD1	9.27158e-43	-0.163436	-0.348743
GOT1	9.67026e-43	0.17204	0.37416
LRPAP1	1.12907e-42	0.197111	0.485201
ZFP710	1.18275e-42	-0.177479	-0.527181
WBSCR22	1.24763e-42	0.170135	0.363891
ARID3A	1.25566e-42	-0.180228	-0.504991
NOG	1.3233e-42	-0.272515	-2.44624
ATP8A1	1.4305e-42	-0.183152	-1.28331
CACNB3	1.57564e-42	0.111897	0.658484
ABHD17C	1.6014e-42	-0.160148	-0.397617
LIG1	1.78532e-42	0.149684	0.290486
GNB5	2.00642e-42	-0.157412	-0.699353
NSG2	2.03004e-42	-0.170127	-0.821115
B230219D22RIK	2.0565e-42	-0.145286	-0.231243
ISG20L2	2.08373e-42	-0.167163	-0.398955
SGK1	2.29647e-42	0.0399542	1.06255
SKP2	2.33188e-42	-0.160671	-0.326995
PPFIA1	2.38312e-42	-0.178718	-0.396591
SH3RF1	2.4352e-42	-0.175258	-0.740643
UBE2D1	2.47339e-42	-0.154956	-0.291607
ELAVL2	2.54139e-42	-0.188172	-0.484065
TMED10	2.59278e-42	-0.128659	-0.194411
KCTD6	2.73523e-42	-0.172751	-0.996259
CHMP4C	2.99479e-42	0.0326138	1.19673
FGF10	3.1547e-42	-0.262302	-2.52101
GNA14	3.18151e-42	0.0408917	0.984429
MACROD2	3.3465e-42	-0.17079	-0.529377
MAPK10	3.46714e-42	-0.259325	-2.20711
TMEM251	3.50575e-42	-0.167127	-0.469328
RALGAPA1	3.72373e-42	-0.176958	-0.617607
RPL39	3.84232e-42	0.085141	0.125188
CARHSP1	3.91076e-42	0.202715	0.424105
LNPK1	3.97685e-42	-0.180744	-0.502307
ATP6V1G1	4.0915e-42	-0.118348	-0.179135
TNFAIP8	4.11467e-42	-0.158601	-0.36166
SPARCL1	4.1526e-42	-0.267166	-2.32998
PRKCI	4.52004e-42	-0.17916	-0.622901
SHTN1	4.63948e-42	-0.238938	-2.15403
GNB4	5.0402e-42	-0.185783	-0.69161
SOX3	5.27559e-42	-0.187196	-0.34641
PFN1	5.62665e-42	-0.0948598	-0.145364
EPOR	5.81115e-42	0.0337794	1.21604
SERBP1	6.06803e-42	0.0720142	0.102972
TMEM54	6.9848e-42	0.0167799	1.65952
GM16286	7.03309e-42	-0.132163	-0.222985
ZFP280D	8.67532e-42	-0.171464	-0.327291
TCF15	8.85258e-42	0.046814	0.837389
KEAP1	8.88604e-42	-0.170362	-0.612315
CDX2	9.00804e-42	-0.320101	-2.39963
GLDC	1.02699e-41	-0.172497	-0.507665
CYB5A	1.06848e-41	0.144734	0.301393
CENPQ	1.0928e-41	-0.157456	-0.360333
ZKSCAN3	1.09315e-41	-0.169334	-0.372635
COX5B	1.15983e-41	0.112089	0.184665
AGAP1	1.23466e-41	-0.177372	-0.43861
DCP2	1.26725e-41	-0.158854	-0.311691
DYNC2LI1	1.27444e-41	-0.158768	-0.518157
KRCC1	1.30334e-41	-0.177415	-0.4449
ATP6V0E	1.46375e-41	0.147197	0.313234
CKMT1	1.50453e-41	0.0168936	1.67283
ARPP19	1.54893e-41	0.114066	0.209404
LMAN1	1.66269e-41	-0.151325	-0.229137
MOB1A	1.82714e-41	-0.164644	-0.491853
NKX1-2	2.01295e-41	-0.00352822	-0.343491
CENPB	2.10823e-41	-0.167574	-0.326336
PCNA	2.85022e-41	-0.154604	-0.230322
EIF3K	2.99335e-41	0.109097	0.176699
RER1	2.99335e-41	-0.133301	-0.199263
KMT5A	3.41558e-41	-0.138049	-0.229724
NME2	3.6076e-41	-0.155087	-0.656868
MESDC1	4.19803e-41	-0.163824	-0.568495
ZKSCAN2	5.03154e-41	-0.192924	-2.03159
SOCS4	5.13261e-41	-0.17516	-0.584361
GDF10	5.14146e-41	-0.198522	-1.33507
FHDC1	5.3946e-41	0.0637411	0.764681
MEX3A	5.84878e-41	-0.171776	-0.319701
ANXA6	5.88006e-41	0.0580284	0.907196
GALNT7	5.9762e-41	-0.184087	-0.563724
FIGNL1	6.07562e-41	-0.170368	-0.479265
SOX21	6.09284e-41	-0.19077	-0.425321
NEGR1	6.64342e-41	-0.181869	-1.38701
NRP2	7.06309e-41	-0.076755	-0.337444
DAB1	7.13608e-41	-0.174004	-0.593823
TGS1	8.08577e-41	-0.142269	-0.228872
RAB8B	8.23667e-41	-0.165382	-0.744168
GABRG1	8.94572e-41	-0.272613	-2.90966
TMX1	9.21962e-41	-0.164897	-0.373846
PLEKHJ1	9.34292e-41	-0.128854	-0.208421
ANKRD13B	9.45488e-41	-0.171163	-0.860371
TES	1.01934e-40	0.109685	0.608614
IGFBPL1	1.02412e-40	-0.155168	-0.586329
NCALD	1.118e-40	-0.200388	-1.24334
UTY	1.16309e-40	-0.193521	-0.897901
SUPT5	1.20237e-40	0.169834	0.354259
SPARC	1.24738e-40	0.279663	0.415955
BEX4	1.29852e-40	-0.132045	-0.183385
ABI2	1.34429e-40	-0.162256	-0.396847
ATP11B	1.4476e-40	-0.168158	-0.596163
HACE1	1.48672e-40	-0.173343	-0.721895
SENP7	1.61141e-40	-0.164955	-0.555963
MAB21L2	1.61724e-40	-0.161209	-1.11305
ZFAND5	1.68944e-40	-0.156185	-0.268456
TMEM123	1.936e-40	-0.168458	-0.644371
NEDD4	1.95112e-40	-0.122985	-0.182943
X6430573F11RIK	2.04872e-40	-0.190155
GTPBP10	2.14121e-40	-0.162772	-0.48602
ELP4	2.25429e-40	-0.164992	-0.404963
CAMK2D	2.39733e-40	-0.179073	-1.00891
ANXA11	2.87217e-40	0.0507653	0.937964
ZFP760	2.87217e-40	-0.167816	-0.579182
CDH4	3.20253e-40	0.101326	0.727285
FAM195A	3.28245e-40	-0.169317	-0.634019
ARHGAP5	3.71175e-40	-0.156939	-0.252721
LPIN2	3.73796e-40	-0.167706	-0.646879
LRRC8B	3.84353e-40	-0.18201	-1.04971
CDKN1C	3.88928e-40	-0.152809	-0.316875
ATXN10	3.90712e-40	-0.130424	-0.212758
NPHP3	4.12312e-40	0.0840778	0.786981
SLC25A3	4.13069e-40	0.103909	0.16774
CSNK1G3	4.21592e-40	-0.147387	-0.281543
ZFP365	4.36709e-40	-0.174123	-1.47565
SYT11	4.36932e-40	-0.177108	-0.428822
MAPK12	4.62841e-40	-0.170335	-0.469142
FAM136A	4.64583e-40	-0.125424	-0.198024
DTD2	4.8321e-40	-0.157983	-0.456171
RBM7	6.39373e-40	-0.146857	-0.292015
TOMM40	6.66591e-40	0.132839	0.257725
PTPN13	7.09841e-40	-0.127667	-0.229072
HNF1B	8.24183e-40	-0.324456	-2.89461
G0S2	8.95003e-40	0.0734542	0.833132
ARHGEF10	1.00965e-39	-0.167444	-1.13782
CPE	1.0193e-39	-0.159665	-0.393133
PIP5K1B	1.08102e-39	-0.18835	-1.9948
PFDN4	1.09002e-39	-0.139756	-0.23019
CIB1	1.101e-39	0.183818	0.439486
BLVRB	1.14094e-39	0.102707	0.688186
FNDC3C1	1.19646e-39	-0.180156	-0.396093
PHF20L1	1.28763e-39	-0.163361	-0.436862
PPP2CB	1.39068e-39	-0.160966	-0.410015
NKX2-1	1.66951e-39	-1.51388	-9.13203
RAB34	1.72549e-39	-0.158642	-0.320558
ZFP871	1.77393e-39	-0.172134	-0.448941
DPP8	1.85722e-39	-0.181163	-0.543295
TMEM199	1.86674e-39	-0.146812	-0.343028
PCMT1	1.90251e-39	-0.137394	-0.232441
DMD	1.93881e-39	-0.172075	-1.23149
MCM3	1.95159e-39	0.141338	0.264786
LITAF	2.09656e-39	-0.162445	-0.505792
STMN3	2.15707e-39	0.151042	0.565068
SMARCD1	2.1735e-39	0.155164	0.303649
X2610027F03RIK	2.26402e-39	-0.292228
TRIM37	2.49964e-39	-0.150744	-0.268569
SLC16A13	2.50787e-39	0.103212	0.718871
ANP32B	2.59697e-39	0.0809903	0.120045
VEGFA	2.61724e-39	-0.169373	-0.678811
NRGN	2.82093e-39	0.0404996	0.775545
IPO5	3.01471e-39	-0.142611	-0.206115
NKX6-2	3.21212e-39	-0.301027	-1.76781
TMUB1	3.2954e-39	-0.15272	-0.814556
HIST3H2BA	3.36281e-39	0.183121	0.536835
JTB	3.44492e-39	-0.154028	-0.33834
PKIA	3.51866e-39	-0.155504	-0.697329
SFXN1	3.67916e-39	0.158967	0.314008
LSM8	3.86129e-39	-0.12657	-0.181974
TDRD7	3.90134e-39	0.0673541	0.839524
PTS	4.23867e-39	-0.15149	-0.389209
RAB11FIP1	4.35632e-39	-0.172779	-0.637253
X9430076C15RIK	4.39138e-39	-0.359481
ACADS	4.65697e-39	0.176699	0.493518
GSE1	4.85321e-39	-0.172153	-1.31523
BOK	5.34204e-39	-0.167074	-0.409064
IDH2	5.43262e-39	-0.137105	-0.212104
FAM84B	5.58842e-39	-0.16415	-1.12589
CENPA	5.6807e-39	-0.156892	-0.221368
CLN5	5.90536e-39	-0.154631	-0.750472
DNAJC19	6.23745e-39	0.135606	0.272056
LAMP2	6.81882e-39	-0.161963	-0.572861
PCNP	7.21196e-39	-0.142368	-0.23428
KLC3	7.6855e-39	0.0601029	0.80914
TCEAL6	8.33822e-39	0.0629755	0.888613
IRF2BPL	1.12397e-38	-0.140332	-0.593611
WDR86	1.20636e-38	0.145158	0.570836
FAM189A2	1.24677e-38	-0.189205	-1.95463
UBXN7	1.37881e-38	-0.146319	-0.427733
TOX2	1.52972e-38	-0.176723	-1.41223
X6720427I07RIK	1.73936e-38	-0.164337
PBK	1.7619e-38	-0.151874	-0.353338
FSCN1	1.8168e-38	-0.122261	-0.18329
COX6C	1.8227e-38	0.084509	0.136421
TCEAL1	1.88108e-38	-0.164138	-0.843994
TPM2	1.94277e-38	0.19891	0.468615
TFAP4	1.94775e-38	-0.157891	-0.524778
REEP1	1.97314e-38	-0.164337	-1.0775
MNS1	2.22342e-38	0.173536	0.37779
UBALD2	2.38857e-38	0.192394	0.394069
ROMO1	2.44105e-38	0.127455	0.236131
SORD	2.50474e-38	0.0471	0.981615
IPO7	2.60041e-38	-0.147757	-0.239088
HAP1	2.63803e-38	-0.168055	-1.23528
SRSF1	2.97097e-38	-0.139743	-0.201502
TEAD1	3.34191e-38	-0.168366	-0.333777
GLRX5	3.417e-38	-0.112239	-0.187018
ZFP771	3.52986e-38	0.17395	0.371653
GSTT1	3.54403e-38	0.0425209	1.03359
JAK2	4.02297e-38	-0.192959	-1.84557
TMEM41B	4.13557e-38	-0.15145	-0.486881
SNRPD2	4.41483e-38	0.0846203	0.132775
PGAM1	4.53206e-38	-0.0719169	-0.106149
HEBP2	4.97185e-38	0.086079	0.711774
ARHGEF26	4.97212e-38	-0.164558	-0.94451
BSPRY	5.12177e-38	0.0258432	1.20179
CSNK1A1	5.49744e-38	-0.112143	-0.15244
AIG1	5.98002e-38	-0.164922	-0.436096
RBM15B	6.61725e-38	-0.152292	-0.346166
TMEM263	7.13626e-38	-0.158369	-0.574453
X3632451O06RIK	7.22864e-38	-0.156679
GM5218	7.84012e-38	-0.120315	-0.175866
MIS18A	8.07069e-38	-0.148541	-0.314569
TCEA3	8.41501e-38	0.0479638	0.816543
CRB2	8.45905e-38	-0.170844	-0.68994
RAB13	9.12175e-38	0.172657	0.438866
GREM1	9.28144e-38	-0.243033	-1.83774
MAN1A2	1.04701e-37	-0.156287	-0.324483
LEMD3	1.05868e-37	0.0423197	0.977772
USP11	1.08472e-37	-0.155635	-0.777138
MPC1	1.17545e-37	-0.149157	-0.741799
KHDRBS1	1.21297e-37	-0.12542	-0.185748
UBL4A	1.26596e-37	0.184134	0.400414
COMT	1.30349e-37	0.215283	0.448366
SLC39A10	1.33942e-37	-0.16263	-0.298458
CLDN10	1.40071e-37	-0.0786071	-0.70043
AK4	1.48589e-37	-0.170437	-0.42967
AMFR	1.79926e-37	-0.157232	-0.531488
TMOD2	1.88841e-37	-0.153428	-0.629923
VIT	2.01932e-37		-24.9346
SARNP	2.23502e-37	-0.132532	-0.197869
SLC44A5	2.45645e-37	-0.226428	-2.51506
DES	2.55785e-37	0.0574057	0.876971
COLGALT1	2.93224e-37	-0.156947	-0.397499
KDM5D	2.99725e-37	-0.18326	-0.824153
DSP	3.57885e-37	0.0602679	0.745695
SALL3	4.147e-37	-0.0998904	-0.28441
GNAI2	4.28279e-37	0.0989583	0.155468
ARMC10	4.35763e-37	-0.145024	-0.304535
UGCG	4.44536e-37	-0.169245	-0.494119
CDC42SE1	4.62222e-37	-0.150885	-0.428961
TRIM35	4.91734e-37	-0.148215	-0.343784
ASCL1	5.1771e-37	-0.752551	-5.7532
PAPOLA	5.38499e-37	-0.124712	-0.189534
F2R	5.76078e-37	-0.155888	-0.413097
PHC2	6.91944e-37	-0.137306	-0.262863
MIB1	7.09782e-37	-0.163499	-0.422568
CYP26B1	7.71325e-37	-0.801695	-5.39375
COX14	7.7207e-37	0.174087	0.384499
REV3L	8.04249e-37	-0.174734	-0.546851
RALYL	8.43215e-37	-0.553477	-6.41509
PSMC3	8.58929e-37	0.114707	0.216419
GM8797	8.6843e-37	-0.127928	-0.176959
MGARP	8.83507e-37	-0.155157	-0.581663
JADE2	9.25903e-37	0.0300423	1.14513
EEF1B2	9.43593e-37	-0.0599577	-0.0877991
THSD4	1.00306e-36	-0.190926	-2.20194
FAM76B	1.00494e-36	-0.144239	-0.308846
TWF1	1.11853e-36	-0.15562	-0.388963
GRHPR	1.19538e-36	0.155117	0.334482
YWHAB	1.2053e-36	-0.105346	-0.157248
INTS6L	1.22659e-36	-0.155821	-0.945617
TM6SF1	1.24771e-36	0.0488678	0.881182
PUS3	1.28453e-36	-0.149552	-0.429942
RAB10	1.3067e-36	-0.13307	-0.238809
GSTT3	1.39571e-36	0.0226617	1.27371
ZBED4	1.77011e-36	-0.167251	-0.524256
KLHL22	1.78621e-36	-0.151225	-0.631518
FGD4	2.02798e-36	-0.166677	-0.91342
SEC11A	2.1703e-36	-0.109192	-0.13272
ASAH1	2.34466e-36	-0.155293	-0.53592
ZKSCAN1	2.37161e-36	-0.150314	-0.607884
PAX3	2.68572e-36	-0.313859	-1.03487
TMEM121	2.72834e-36	-0.162808	-0.422497
X2200002D01RIK	2.73204e-36	0.0717236
NOP16	2.75483e-36	-0.138427	-0.252837
EDARADD	2.81598e-36	-0.213993	-1.91831
DYNLT1C	2.86901e-36	-0.145067	-0.593812
CDCA7	3.22888e-36	0.140137	0.279942
FOXA2	3.30405e-36	-0.296259	-1.77912
GRB7	3.69647e-36	0.0853064	0.417504
IKZF5	3.70784e-36	-0.151362	-0.622546
PPCS	3.95836e-36	0.124152	0.564414
TALDO1	4.37556e-36	0.112882	0.208118
SKIL	4.38577e-36	-0.154968	-0.92767
RNF5	4.40783e-36	-0.147102	-0.307681
BOC	4.5336e-36	-0.171057	-1.07822
SH3BGRL	4.60266e-36	-0.138207	-0.202049
A2M	4.84875e-36	0.0220463	1.43696
NTPCR	4.88549e-36	-0.146225	-0.576225
EFNA5	5.0336e-36	-0.113254	-0.265107
RPL10-PS3	5.04257e-36	-0.128821	-0.187779
GPR50	5.1493e-36	0.00386888	2.69507
LYAR	5.25739e-36	0.116627	0.201284
TNIK	5.33207e-36	0.019748	1.47692
COL4A1	6.19327e-36	0.197574	0.476189
IGF2BP1	6.33729e-36	-0.13086	-0.179861
BMI1	6.59412e-36	-0.15062	-0.580642
GPX8	7.0073e-36	0.115234	0.567881
RPS26	8.72529e-36	0.0607653	0.0885472
JUP	8.89977e-36	0.0394602	0.97927
ARFRP1	9.45452e-36	-0.144791	-0.304752
CYB5R3	9.82216e-36	-0.143005	-0.231618
GOLGA3	1.1545e-35	0.238069	0.589815
GLIPR2	1.23522e-35	0.0670273	0.727103
ZMYND19	1.24359e-35	-0.149901	-0.269753
IGFBP2	1.41631e-35	0.26248	0.108517
CHST14	1.46022e-35	-0.151562	-1.54927
PLPPR1	1.53529e-35	-0.149572	-1.25341
CACNG7	1.58214e-35	0.0572191	0.869891
FER	1.66174e-35	-0.150741	-0.634834
PDIA4	1.67355e-35	-0.148277	-0.247099
ABCG1	1.73034e-35	0.0240646	1.30234
CALD1	1.74051e-35	0.206668	0.389404
SLC38A1	1.74051e-35	-0.140795	-0.23035
FZD9	1.82647e-35	-0.15476	-1.13773
MOGS	1.93494e-35	-0.155912	-0.365945
GDAP1L1	1.9814e-35	0.0586501	0.839299
MUM1L1	2.14411e-35	-0.153024	-0.6338
SNX18	2.3184e-35	-0.152817	-0.453177
UTRN	2.33225e-35	-0.175907	-0.82003
NUS1	2.35668e-35	-0.154184	-0.369521
SMIM3	3.3e-35	-0.132226	-0.611006
CELA1	3.32775e-35	-0.318849	-3.86161
CAT	3.6576e-35	-0.136597	-0.327747
PAK3	3.71848e-35	-0.135182	-0.645025
ENPP2	4.42597e-35	-0.315083	-2.64501
USP9X	4.45793e-35	-0.151142	-0.281265
ATP11C	4.6562e-35	-0.159449	-0.612269
CERS6	4.76103e-35	-0.149645	-0.69304
CELSR1	4.80259e-35	-0.160398	-0.55697
BCAM	5.26531e-35	0.0962837	0.526712
KHK	5.49278e-35	0.0881105	0.679436
TIMELESS	5.52131e-35	0.188551	0.426991
DAPK1	5.60669e-35	0.148621	0.528212
SLITRK6	5.66148e-35		-24.7979
CCDC82	5.73773e-35	-0.152684	-1.12929
FKBP9	5.81871e-35	-0.159181	-0.442168
NCBP2	6.11179e-35	-0.122325	-0.194709
PATZ1	6.77576e-35	-0.147041	-0.300806
SYT13	6.81073e-35	0.0280274	1.20763
OSGEP	6.86257e-35	0.159011	0.354595
EPHB3	6.92987e-35	0.0654818	0.762341
BBX	7.3039e-35	-0.154468	-0.284357
RPL18	7.70983e-35	0.059781	0.0889553
PCOLCE	7.82445e-35	0.0263866	1.24249
TMEM158	8.30195e-35	-0.156167	-0.688768
SRRM3	8.96876e-35	0.0187749	1.44973
MIER1	9.2992e-35	-0.141804	-0.250094
SESN2	9.41278e-35	0.0670121	0.746182
MYL6	9.66449e-35	0.0970476	0.155846
POU6F2	9.67619e-35	-0.257701	-2.91196
CAMKK2	9.96765e-35	-0.151504	-0.790778
DNAJB11	1.00601e-34	-0.131021	-0.210517
RSPO3	1.04975e-34	0.0397186	0.860926
TMED3	1.07337e-34	-0.150737	-0.432999
RPL30	1.13065e-34	0.0576479	0.0867186
CHN1	1.13082e-34	-0.15509	-0.475694
SSR2	1.26648e-34	-0.115011	-0.149831
SRM	1.32296e-34	-0.139492	-0.187006
KITL	1.48975e-34	-0.180831	-1.55424
VAPB	1.58747e-34	-0.129171	-0.232085
PPHLN1	1.65581e-34	0.167219	0.367018
X2610524H06RIK	1.70895e-34	-0.143856
SLC35A1	1.72707e-34	-0.144864	-0.308448
CDCA8	1.73107e-34	0.150159	0.262139
DDX50	1.81378e-34	-0.142256	-0.312026
EIF2S3Y	1.82017e-34	-0.17732	-0.551339
PLLP	1.82212e-34	0.0076522	2.07451
TUBE1	1.83324e-34	-0.153748	-0.667261
AHI1	1.8416e-34	-0.152744	-0.350419
ZCCHC18	1.84307e-34	0.121036	0.563484
OGFR	1.87346e-34	-0.139642	-0.273976
MECOM	1.99911e-34	-0.184736	-1.27985
MT2	2.01829e-34	0.0687123	0.772003
RPL19	2.03629e-34	0.050793	0.0746161
ASPH	2.14013e-34	-0.152701	-0.336816
NABP2	2.73352e-34	0.142688	0.311614
KLHL2	3.02036e-34	-0.151508	-0.55863
KCNA1	3.13634e-34	-0.309204	-2.81662
CCDC136	3.32648e-34	0.177779	0.447578
SLK	3.39177e-34	-0.166072	-0.397482
SELENOI	3.49941e-34	-0.162399	-0.383112
X2610037D02RIK	3.58337e-34	-0.152006
CYTL1	4.15641e-34	-0.438346	-4.84369
E2F5	4.15693e-34	-0.131165	-0.223631
USP40	4.51376e-34	-0.154496	-0.645935
RPP30	4.66484e-34	-0.129345	-0.229103
LRRC4	4.71495e-34	0.0653612	0.707959
GATA6	4.71495e-34	0.0163571	1.52265
FZD8	4.75056e-34	0.0830819	0.347032
KANSL2	4.79033e-34	-0.141815	-0.296601
MAP7	4.90594e-34	-0.146955	-1.16138
LUC7L2	4.94835e-34	-0.124388	-0.169084
KBTBD2	5.37462e-34	-0.138624	-0.458842
GM8186	6.95494e-34	0.135582	0.264545
UNC13B	7.16585e-34	-0.153779	-0.84642
KRT18	7.61315e-34	0.146357	0.330205
PHGDH	7.76115e-34	0.160012	0.326135
NR4A2	7.98428e-34	-0.166254	-1.7325
RNF10	8.10153e-34	0.139147	0.300397
SUCLG2	8.23577e-34	-0.135043	-0.25068
MED28	8.42854e-34	-0.132856	-0.241976
HOOK3	8.51502e-34	-0.167968	-0.468706
ABCB8	8.52017e-34	0.0981489	0.62856
MSX1	8.62861e-34	-0.205897	-1.07114
SLC38A2	9.11909e-34	-0.143312	-0.214907
HAUS3	9.72187e-34	-0.13332	-0.302315
ATP5SL	9.92129e-34	0.147343	0.512882
TRAPPC4	9.99791e-34	-0.115993	-0.179956
NAB2	1.04708e-33	-0.217617	-2.13577
PHB	1.05716e-33	0.159159	0.337972
PBX4	1.07477e-33	-0.141467	-0.785254
BCR	1.14676e-33	-0.156432	-0.605424
DTX4	1.16824e-33	-0.146648	-0.583445
L2HGDH	1.17608e-33	-0.146167	-0.62562
SGPL1	1.24463e-33	0.123089	0.594947
FGF15	1.25256e-33	-0.112567	-0.394381
NEK6	1.30477e-33	-0.137005	-0.583205
GLOD5	1.37792e-33	0.0141651	1.61042
KLHL14	1.41627e-33	-0.168312	-1.71972
HDLBP	1.5609e-33	0.123608	0.233667
PPP1R3G	1.60701e-33	0.0573311	0.842014
VAMP4	1.60701e-33	-0.145443	-0.401737
TRAPPC13	1.62423e-33	-0.13103	-0.242164
CCNE1	1.6641e-33	0.196947	0.369995
EPHB1	1.74219e-33	-0.134909	-0.471166
CRB3	1.76027e-33	0.0360089	0.486333
LONRF2	1.84888e-33	-0.170012	-2.18026
HMGB1	1.94287e-33	0.0624911	0.0916184
DARS	2.03624e-33	-0.133831	-0.247653
FAM120A	2.06748e-33	-0.148446	-0.414581
GMFB	2.15628e-33	-0.147245	-0.327006
SNN	2.16474e-33	-0.143701	-0.374186
UBE2W	2.20235e-33	-0.150003	-0.452958
PELI1	2.37119e-33	-0.150663	-0.297608
GGH	2.37372e-33	-0.139172	-0.878446
WNK3	2.58039e-33	-0.164061	-0.463796
NDUFS7	2.72351e-33	0.124461	0.256255
MRPL51	2.84799e-33	0.116065	0.234296
CDH13	2.87281e-33	0.0799365	0.717797
UQCRH	2.97632e-33	0.0758339	0.11468
RRAGD	3.13903e-33	0.163492	0.346916
NIFK	3.23026e-33	-0.125137	-0.193367
CDK18	3.28961e-33	0.0308255	0.999822
HBP1	3.29698e-33	0.157751	0.492353
L3MBTL3	3.37555e-33	0.128087	0.544409
FOXC2	3.46054e-33	0.0173662	1.43415
COCH	3.75176e-33	0.0498885	0.965314
ANTXR1	3.79746e-33	0.025475	1.20019
DDX24	4.04816e-33	0.113849	0.225567
GRN	4.199e-33	0.112954	0.604028
NRK	4.205e-33	0.0175139	1.43537
SNX15	4.36589e-33	0.0918242	0.589831
MARCH7	4.44064e-33	-0.145935	-0.292519
SMIM10L1	4.56833e-33	-0.1536	-0.37675
X2210013O21RIK	4.58807e-33	-0.140772
TRAF3IP1	4.82371e-33	0.130244	0.526981
SV2A	4.82838e-33	0.0375617	1.04653
GABARAPL2	4.89947e-33	-0.123506	-0.189243
NEDD1	5.12475e-33	-0.152393	-0.474761
LSM14B	5.31609e-33	-0.151209	-0.363308
MEMO1	5.4803e-33	-0.141602	-0.322535
MATR3	5.50462e-33	-0.120331	-0.183414
NDUFA5	5.76982e-33	0.114534	0.22803
GPHN	6.04666e-33	-0.153854	-0.659998
GSK3B	6.28551e-33	-0.137688	-0.217507
EEF1A1	6.82901e-33	-0.0906897	-0.137825
STAM2	6.89085e-33	-0.144618	-0.526948
DNAJB14	7.31266e-33	-0.147469	-0.702864
CINP	7.46035e-33	-0.137262	-0.286368
WASF1	7.81995e-33	-0.138898	-0.339833
ROCK2	7.91927e-33	-0.141657	-0.253453
SCG3	8.19134e-33	-0.173948	-2.4329
CDC42SE2	8.28362e-33	-0.136914	-0.290405
MYH14	8.35325e-33	0.0339085	1.05949
BSG	8.41094e-33	-0.0856333	-0.113946
IQCB1	8.53861e-33	-0.143392	-0.384603
NBEA	8.697e-33	-0.146655	-0.541154
TMEM243	9.17522e-33	-0.140582	-0.371598
SMEK2	9.19441e-33	-0.144318	-0.282576
DMKN	9.46779e-33	0.0133416	1.66059
YES1	9.46841e-33	-0.155126	-0.533056
ELAVL4	9.7051e-33	-0.170616	-1.6553
ALKBH5	1e-32	-0.147905	-0.312282
ACAT1	1.00508e-32	-0.137582	-0.6467
SDC1	1.01904e-32	-0.150613	-0.375696
PRPF40A	1.0615e-32	0.112767	0.206925
ACSL4	1.18055e-32	0.137913	0.545102
PDCD6	1.20704e-32	-0.115473	-0.200123
TMED4	1.23875e-32	-0.140822	-0.309246
FNDC3A	1.2465e-32	-0.148679	-0.339495
HNRNPL	1.29168e-32	-0.127062	-0.179285
DENND1A	1.3208e-32	-0.144262	-0.674523
FAM126A	1.35951e-32	-0.148167	-0.697756
CBFB	1.58254e-32	-0.144413	-0.392413
[truncated: 10,278 more rows]

## Sheet: PhenoGraph cluster 1
gene	P-value (FDR adjusted)	MAST Hurdle	logFC
RBP1	0	1.3637	2.34863
MEIS2	0	1.36006	1.87005
APOE	0	1.17386	1.5013
LDHB	0	1.12142	1.341
FST	0	0.960264	1.82072
MKRN1	0	0.888332	1.39927
MRPL34	0	0.837376	1.24483
ACER2	0	0.827606	1.7378
E130012A19RIK	0	0.797176	1.29695
AES	0	0.774064	1.28787
SALL4	0	0.748078	1.05632
POU5F1	0	0.724807	3.56878
METRN	0	0.693676	1.51892
OAT	0	0.693342	2.19562
HPRT	0	0.657347	1.12222
PAK1	0	0.652789	1.24785
NECTIN2	0	0.644249	1.90343
ZMYND8	0	0.623466	1.04556
NUDT4	0	0.607814	1.46028
HES3	0	0.601888	1.74638
FOXP1	0	0.595578	1.2588
AKAP12	0	0.590683	1.55745
PIM2	0	0.562581	1.47185
EPCAM	0	0.557073	2.74738
GPX4	0	0.539504	0.836508
NDUFA12	0	0.516679	0.830358
CHCHD10	0	0.506725	2.14653
SSSCA1	0	0.505398	0.821888
GRSF1	0	0.481203	0.964412
MDK	0	0.45897	0.682981
EBP	0	0.421559	1.30678
NDUFB4	0	0.410464	0.708469
OXCT1	0	0.390895	1.79012
ATP5L	0	0.39075	0.626507
CXX1A	0	0.388891	1.35767
CXX1B	0	0.352332	1.66204
LHPP	0	0.347557	2.23739
BST2	0	0.342211	1.56147
UPP1	0	0.331236	3.47819
ECI1	0	0.32449	1.6803
COX7C	0	0.311405	0.45531
GBX2	0	0.302169	2.95161
ALPL	0	0.295075	2.0677
SKAP2	0	0.292761	2.19796
COX8A	0	0.27704	0.414017
PHLDA3	0	0.251666	3.0427
ZFP703	0	0.227907	3.74217
HOXB2	0	0.221353	2.93426
ECHDC2	0	0.220286	1.84539
CDH1	0	0.201622	2.21849
FGFBP3	0	0.185676	2.65757
DUSP9	0	0.183372	2.36405
TMEM238	0	0.182996	2.19168
SLC7A3	0	0.162053	2.21105
FBLIM1	0	0.143247	2.20294
TSHZ1	0	0.133795	3.45456
CXCL12	0	0.129123	3.58151
LPGAT1	0	0.126171	2.07005
PDLIM1	0	0.12527	2.09765
APELA	0	0.120512	2.85267
PORCN	0	0.109691	2.3504
HOXB1	0	0.1092	4.40982
HSPB1	0	0.107697	2.84827
WNT8A	0	0.105427	4.75751
X1700019D03RIK	0	0.0993428
HOXA1	0	0.090959	6.33423
PLPPR1	0	0.084347	2.44675
DACT2	0	0.081745	2.9414
CDKN1A	0	0.0814066	2.67797
EPHA1	0	0.0693972	3.08812
LLGL2	0	0.0661156	2.92689
TCEA3	0	0.0650944	2.55026
ZADH2	0	0.0641592	2.64497
SEMA3E	0	0.0630082	2.75236
B3GNT7	0	0.056948	3.18323
EPHX2	0	0.0484657	2.72064
RARB	0	0.047872	2.74575
ETV4	0	0.0439585	3.30764
CDX1	0	0.0405908	6.89674
NKX1-2	0	0.0379971	5.4205
HNF1B	0	0.0219348	4.49838
CDX2	0	0.0153204	7.01979
HOXB4	0	0.00779011	5.89459
PPL	0	0.00455378	5.64714
HOXA5	0	0.00378437	5.54924
GM6792	0	0.00324647	6.12037
RPS2	0	-0.252973	-0.368409
H3F3A	0	-0.280653	-0.406219
H2AFV	0	-0.292266	-0.441859
BNIP3L	0	-0.455135	-0.711402
MAP4K4	0	-0.459988	-0.868752
SOX11	0	-0.467075	-0.700254
TSC22D1	0	-0.488596	-0.958568
PTMS	0	-0.489687	-0.840268
SOX4	0	-0.492558	-0.81256
JAM3	0	-0.538956	-1.47026
PTPN13	0	-0.552044	-1.48348
SALL2	0	-0.592414	-1.43247
TMSB4X	0	-0.594864	-0.887417
EFNA5	0	-0.624503	-1.85557
SERF1	0	-0.624857	-1.43378
MIR124-2HG	0	-0.6477	-2.3819
X6330403K07RIK	0	-0.657427
NDN	0	-0.668426	-1.48963
ABLIM1	0	-0.676018	-2.58747
ZBTB16	0	-0.69391	-2.58203
TOX3	0	-0.700716	-1.86614
TLE4	0	-0.7157	-1.60057
PEG12	0	-0.765664	-2.9998
GM2694	0	-0.777464	-2.68867
PALLD	0	-0.789674	-2.41311
ILDR2	0	-0.795406	-2.25235
CDH2	0	-0.822717	-1.90687
SOX2	0	-0.824194	-1.52281
SOX21	0	-0.901982	-2.97988
PAX2	0	-0.912329	-3.04839
VSTM2B	0	-0.928955	-3.69755
LIX1	0	-1.00805	-2.7617
SPON1	0	-1.02939	-4.42529
LMO1	0	-1.23964	-4.31207
SHISA2	0	-1.27915	-3.48855
FAM181B	0	-1.41065	-3.4944
IRS4	0	-1.42511	-4.44396
NR2F1	0	-1.46693	-4.55343
MEST	0	-1.51476	-2.71741
OTX1	0	-1.51511	-6.9374
NR2F2	0	-1.55541	-5.21805
OTX2	0	-1.89029	-5.02476
SIX3	0	-2.50997	-5.02761
EN1	0	-3.00685	-7.49143
GABRG1	4.63758e-308	0.0295032	3.30429
X1810022K09RIK	1.52871e-305	0.427211
ZFP608	2.18024e-303	-0.516158	-1.53036
CHST2	5.44088e-303	-0.853498	-2.61888
IFITM2	5.46962e-303	-0.466229	-0.721122
EPHA7	2.17214e-302	-0.964547	-2.99921
SMYD2	1.74051e-299	0.377045	1.27204
MAPK13	3.80076e-299	0.0612466	2.48621
SLC25A4	2.60619e-297	-0.47	-0.750797
KCNH2	9.42451e-295	0.136627	1.90848
NXN	2.06075e-293	0.475091	1.13523
SH3GL3	2.97457e-293	0.0967762	2.1283
DDAH2	1.02437e-289	-0.429044	-0.849183
NUAK2	1.55595e-289	-0.562462	-2.1381
GRB7	8.66412e-289	0.190989	1.75312
DHRS3	9.46896e-289	0.015308	3.66007
STRA6	5.0164e-287	0.128172	2.07194
RRBP1	7.1755e-287	0.461544	0.762526
CCNB1IP1	3.35497e-286	0.0472221	2.72009
POU3F2	2.09324e-281	-1.12183	-4.15023
CD47	4.51315e-279	-0.594008	-1.97629
MCC	1.44202e-277	0.0651546	2.59958
TDH	3.46148e-277	0.0168337	3.79254
EVA1B	4.37967e-274	0.21313	1.64854
HESX1	6.26314e-274	-1.68256	-4.67134
UCHL1	1.03856e-272	-0.565185	-1.36547
EHBP1	2.31786e-271	-0.811869	-2.77988
LMO4	5.47921e-271	0.598227	0.879015
CELF2	2.20699e-270	-0.577925	-1.62401
ATP5K	1.27087e-269	0.431985	0.685383
TENM4	4.4979e-267	-0.574131	-1.39605
NFIB	8.6641e-267	0.040942	2.77876
MYLK	2.80739e-265	-0.775181	-2.89971
TTC3	3.30016e-263	-0.356809	-0.548407
HINT1	4.89497e-262	0.252546	0.377932
QK	5.64278e-262	-0.415725	-0.678878
LGALS1	7.31377e-260	0.493373	1.1836
PAK3	4.30997e-259	-0.773138	-3.44587
FAM81A	2.87081e-258	0.0264048	3.05119
NTRK2	1.17299e-255	0.0876151	2.16907
RBPMS2	5.7592e-255	0.527139	1.20365
ZIC3	4.77494e-252	0.508241	1.35458
MRPL42	1.16902e-251	0.331012	0.552558
HSP90AA1	1.67253e-250	0.297161	0.442889
L1TD1	6.79339e-250	0.189656	1.46479
KIF21A	6.54517e-249	-0.484412	-1.0604
OAZ1	3.726e-248	-0.194954	-0.289585
PAX5	2.45722e-247	-1.57073	-5.56283
RFX4	1.97568e-246	-0.765424	-2.17916
ATP5C1	4.23561e-246	0.289268	0.459035
APOC1	6.94791e-246	0.140222	1.75115
FEZF1	2.37457e-245	-1.49072	-5.81799
VRTN	7.04937e-245	0.0895296	1.90427
DEK	1.3571e-243	0.230414	0.349802
TUBA1A	1.78422e-243	-0.399772	-0.613141
RASGRP2	2.64116e-243	0.501738	1.28672
ATP5A1	3.6661e-243	0.292769	0.475169
AJAP1	1.13861e-242	-0.575791	-2.34819
FEZ1	6.58957e-242	-0.833762	-3.38595
VIM	1.30536e-241	0.569703	1.33937
MEOX1	2.17582e-241	0.0334664	2.89775
RPL31	1.03205e-240	0.194795	0.287325
CLDN5	3.85478e-240	0.0129336	3.76166
PTN	7.31157e-240	-0.731046	-1.09453
GNA14	5.95498e-239	0.0482538	2.51601
PLEKHA1	3.31657e-238	-0.53019	-1.28652
TCF12	1.04091e-237	-0.442549	-0.881324
X5730596B20RIK	6.14047e-236	0.0139374
HOXA3	1.23315e-235	0.0198305	3.025
IGFBP5	5.0525e-235	-0.833393	-2.35803
PDGFA	6.36175e-235	0.620803	1.11529
ACP5	1.43319e-234	0.0298047	2.81914
FZD3	3.51626e-234	-0.496501	-1.37003
GM11627	5.19386e-234	0.173159	1.60154
OLIG3	9.00311e-234	0.0623733	2.57241
ALYREF	3.74533e-233	-0.352473	-0.527299
H2AFY2	4.15753e-232	-0.335312	-0.585279
GALT	4.96615e-229	0.109172	1.81002
USP3	6.69004e-229	0.490399	0.877272
HOXB8	8.71847e-229	0.00309859	6.36951
POLR2L	1.05612e-228	0.612812	0.938442
TMEM59L	1.36266e-228	0.05195	2.3753
LHX5	9.30957e-228	-0.881808	-2.75696
H2AFY	4.84947e-227	-0.42442	-0.696604
TCF7L2	5.82408e-227	-0.595515	-1.42577
DSG2	1.5571e-226	0.0659733	2.20857
NAV1	9.6952e-226	-0.544385	-1.32092
HES5	7.32792e-225	-1.03102	-2.76794
DST	1.84404e-223	0.498822	1.15499
SORBS2	5.29213e-223	-0.663039	-2.76016
FBN2	1.65366e-222	-0.732124	-2.52945
SYT11	1.98072e-222	-0.509354	-1.44213
IGF2BP3	5.92984e-222	-0.355579	-0.611361
ATP5B	1.04823e-220	0.295722	0.463413
RAX	2.49029e-220	-2.08841	-5.73907
MLLT3	3.1392e-220	-0.555389	-1.44538
GPX8	3.57496e-218	0.21776	1.42634
FIGN	3.89321e-218	-0.497854	-1.37772
SLC7A7	2.18144e-216	0.0369958	2.58381
MYL7	6.32659e-215	0.0943634	1.88395
LHX2	4.99238e-214	-1.58627	-4.03205
CKB	6.79604e-214	0.430431	1.31103
SMIM14	1.7182e-213	-0.444676	-1.46967
PHLDA1	6.69801e-213	-0.7345	-1.82987
HELLS	1.02229e-212	0.409514	0.667422
TMEM47	1.55095e-212	-0.463878	-0.9558
DUSP5	1.83398e-211	-0.620377	-2.47292
MAFB	1.14854e-210	0.0989006	1.63974
SLC25A3	1.99038e-210	0.241382	0.380271
SOST	2.17536e-209	0.00266894	5.32212
RSPO3	7.38984e-209	0.0529367	2.38678
PRICKLE1	5.93447e-208	0.0507329	2.45429
GSTA4	1.1547e-207	-0.356002	-0.597198
ZFHX4	1.71026e-205	-0.684411	-2.63772
GM10076	5.82707e-205	0.586275	0.856694
HSPE1	6.08661e-205	0.18092	0.266478
SEPT3	2.65716e-204	-0.449742	-1.2609
TOMM40	5.50785e-204	0.306811	0.548639
H2-KE6	8.38163e-204	-0.410208	-1.18832
CDX4	2.72534e-202	0.00207637	6.32026
GFRA3	4.20451e-202	0.0165021	3.34739
GAS1	4.37044e-202	-0.531519	-1.30662
PFN2	5.52282e-202	-0.399703	-1.01229
ALKBH7	1.71793e-201	0.275591	1.23257
TES	2.27785e-201	0.185714	1.46643
LMO3	1.14238e-200	-0.822588	-5.26658
CDH11	2.08224e-200	-0.544201	-2.14336
EPHB1	1.77629e-197	-0.507147	-1.81126
SCUBE2	9.01918e-197	-0.805927	-3.75507
NFKBIA	9.99208e-197	0.211799	1.35518
WSCD1	1.15139e-196	-0.577225	-2.17136
CXCR4	2.05911e-195	-0.661774	-3.19067
RPA3	3.31528e-195	-0.356048	-0.616723
MT-ND6	8.3279e-195	-0.513139	-1.07556
FHDC1	3.96833e-194	0.0931121	1.88238
FZD8	6.79771e-193	-0.56179	-2.42599
HSP90AB1	1.23899e-191	0.202191	0.29121
X1700025G04RIK	3.55492e-191	-0.413258
EFNB3	3.93449e-191	-0.520909	-1.83829
KLF9	2.09647e-190	0.197584	1.43048
SOX5	2.93141e-190	-0.726814	-3.8899
NCALD	2.45965e-189	-0.712427	-4.27472
KLF3	4.59261e-188	-0.482795	-1.19301
NR2F6	4.95836e-188	-0.388041	-0.809859
MT-ND1	9.92239e-188	0.386565	0.568878
UQCR10	2.22895e-187	0.258025	0.411433
C130026L21RIK	6.3739e-187	-0.648023	-3.58925
PHLDA2	1.03267e-186	0.218368	1.31259
HMGN3	1.43612e-186	-0.389645	-0.923897
HOXC4	3.00976e-186	0.00275247	5.0768
FBLN1	3.89622e-186	0.466578	0.943737
COX5A	1.28776e-185	0.214542	0.326865
TOMM7	3.42902e-185	0.254744	0.388183
PEA15A	1.2547e-184	-0.411559	-1.24935
X2810459M11RIK	1.55732e-184	0.0120798
MYCN	3.39256e-184	-0.493959	-1.0447
RBPMS	3.51157e-184	0.4498	0.833384
FUOM	4.96307e-184	0.0891088	1.63216
MT-CO1	7.3418e-184	0.308527	0.450557
NNAT	1.36055e-183	-0.458561	-0.818363
TUBB3	1.87331e-183	-0.507154	-1.36618
LIX1L	2.05892e-183	-0.504065	-2.41233
AGMAT	3.55717e-183	0.00697056	4.03039
ZFHX3	3.61475e-183	-0.503848	-1.52404
LAMA5	2.65639e-182	0.143565	1.53884
RPL36AL	1.49155e-181	0.190142	0.280919
STOX2	3.2444e-181	-0.444261	-0.994118
CDK6	4.43441e-181	0.135821	1.59301
FDX1	1.33512e-180	0.224561	1.25651
RAB25	2.49297e-180	0.117929	1.30366
MT-CO3	3.50162e-180	0.317031	0.458511
KLF2	4.53677e-180	0.0471305	2.24405
SRSF9	8.21673e-180	-0.272455	-0.410862
COL2A1	9.65617e-179	-0.465015	-1.4215
UQCRQ	9.97937e-179	0.260146	0.418672
CDC42EP4	1.0479e-177	0.150949	1.47368
FZD5	1.62032e-177	-0.957828	-3.23434
RPL9-PS6	1.69361e-177	-0.270385	-0.403938
TMEM37	1.69381e-177	0.0934749	1.77544
MARCKSL1	3.32572e-177	-0.224155	-0.33325
EID1	3.71656e-177	-0.292621	-0.469691
PLPP4	2.9901e-176	0.0229159	2.6971
PLPP2	5.95674e-176	0.160293	1.40568
KYNU	1.47707e-175	0.0360239	2.46128
TSPAN18	3.72472e-175	-0.546518	-2.65068
SOX9	4.73438e-175	-0.609328	-1.76359
HOPX	8.4694e-175	-0.783871	-2.8482
X2900011O08RIK	1.90618e-174	0.141559
HDAC6	1.04313e-173	-0.450361	-1.11307
ATP5G1	7.89547e-173	0.229347	0.349464
MAGEH1	2.16505e-171	-0.372256	-0.850947
CXXC4	6.16489e-171	-0.508328	-2.11151
MPPED2	6.98388e-171	0.258186	1.15462
GM6133	2.7533e-170	-0.374527	-0.886115
ALCAM	3.0276e-169	0.0883718	1.78285
CYC1	4.44765e-168	0.275264	0.492531
ANXA7	5.06121e-168	0.160783	1.33815
CMAS	6.30755e-168	-0.341469	-0.892811
ERAS	3.75263e-167	0.404622	0.502584
MT-ATP6	5.11226e-167	0.290528	0.420729
RERG	6.50788e-167	0.0203073	2.83013
NEDD4	7.24699e-167	-0.254057	-0.370201
MAB21L2	1.08504e-166	-1.54257	-6.15982
RPS27L	1.35216e-166	0.202856	0.306634
RBBP7	3.06655e-166	0.302645	0.544267
ZFP503	5.42325e-166	-0.273316	-0.808178
FABP7	2.62094e-165	0.199629	1.23105
RPRM	6.14077e-165	-0.567806	-2.16752
APLN	4.55051e-164	0.0604406	2.08575
STRA13	8.28386e-164	0.314373	0.595046
EPB41L4AOS	8.46864e-164	0.398747	0.671923
XIST	1.15466e-163	0.252886	0.809799
SOCS2	2.199e-163	-0.468234	-1.16645
DPYSL2	3.09405e-163	-0.398948	-0.894221
VAMP8	2.12459e-162	0.240321	1.19697
PRR7	3.06069e-160	-0.364909	-0.944818
ZEB1	4.08428e-159	-0.453594	-1.4639
ID3	6.61328e-159	-0.571735	-0.8616
GTF3A	8.70686e-159	0.3171	0.626298
WNT1	1.14895e-157	-1.72835	-6.28665
ENO1	1.22605e-157	0.245673	0.373958
ERDR1	2.50439e-157	-0.318466	-0.470847
CHST7	3.39401e-157	0.0336166	2.41814
RPS6KA4	8.82169e-157	0.0264046	2.53106
NME5	1.45302e-156	0.0313827	2.31924
CADM1	3.63511e-156	-0.345827	-0.676443
TMEM132C	7.71221e-156	-0.657312	-2.76909
HOXD4	8.83083e-156	0.00902945	3.29104
TMEM82	1.37381e-155	0.0592823	1.92017
JAG1	1.44294e-155	-0.551728	-1.80268
HSPA4L	2.203e-155	-0.445388	-1.51153
MKRN3	5.86365e-155	-0.517272	-2.4927
VANGL2	1.62557e-154	-0.345196	-0.806254
PAX8	1.92783e-154	-1.38873	-5.64885
SFXN1	2.9626e-154	0.30343	0.561875
CELSR2	3.05053e-154	-0.392993	-1.23962
SLC24A5	6.33271e-154	-0.344574	-0.717781
RPS18	8.73644e-154	-0.13745	-0.194311
ROR2	1.33776e-153	0.315883	1.05097
SCG5	1.67182e-153	-0.427387	-1.54292
KLF5	3.53569e-153	0.0258186	2.56558
DUSP14	6.80914e-153	0.0405992	2.17766
GLI3	8.33001e-153	-0.409326	-0.879815
PLIN3	1.20391e-152	-0.370022	-0.912586
SSBP2	2.83798e-152	-0.395643	-1.16636
TSPAN3	5.50933e-152	-0.271074	-0.434103
GALNT1	8.89075e-152	-0.364117	-0.858042
NDUFS4	1.31312e-151	0.265474	0.483136
SERPINB6A	8.89627e-151	0.332672	0.983494
MTX2	2.10142e-150	0.317308	0.616791
PFDN2	4.63585e-150	-0.251831	-0.370754
FAM162A	1.39747e-149	-0.237557	-0.353305
HSPD1	1.52617e-149	0.2134	0.325191
ZFP985	3.52972e-149	0.07943	1.69895
PDZPH1	7.08947e-149	-0.505825	-1.88381
DQX1	8.44624e-149	0.227571	1.61132
WLS	1.28307e-148	-0.222991	-0.563637
ZFP422	1.62208e-148	-0.326922	-0.702874
TCF7L1	1.97334e-148	-0.397225	-0.989282
PMM1	2.46508e-148	0.418479	0.779442
MAML3	9.97945e-148	-0.400117	-1.17152
ACOT13	1.85474e-147	0.310513	0.980928
EMX2	1.97364e-147	-1.50026	-6.22451
RARA	2.24024e-147	0.177027	1.24721
ARL6IP5	3.33991e-147	0.221499	1.1001
NANOG	1.6034e-146	0.0660551	1.66235
RHOBTB3	1.61271e-146	-0.318463	-0.627608
POU3F1	1.88644e-146	-0.474134	-0.966853
NREP	2.06639e-145	-0.411685	-1.10843
ID1	2.38737e-145	-0.621949	-1.22063
ZFP516	6.29537e-145	-0.385775	-1.19126
H2-K1	1.48655e-144	-0.383999	-0.829608
INA	1.59857e-144	-0.434766	-1.13487
CCDC177	1.83695e-144	-0.402884	-1.60243
GM1673	5.69634e-144	-0.347125	-0.618639
IRX1	4.862e-143	-0.600169	-1.78903
IFT57	5.72642e-143	-0.368954	-1.14811
TPBG	1.03164e-142	-0.431777	-1.14485
HEBP2	1.07474e-142	0.128292	1.35702
DOCK7	1.90419e-142	-0.343906	-0.855696
BCAM	3.54741e-142	0.171158	1.26145
MEX3A	6.378e-142	-0.324392	-0.636668
ATOX1	1.62842e-141	0.242379	0.412086
TRAF3IP1	2.45465e-141	0.219302	1.1033
PCSK1N	6.3053e-141	0.0929108	-0.22064
NDUFA5	1.73084e-140	0.239265	0.420266
PANTR1	3.08933e-140	-0.636022	-3.3727
NDUFS6	6.40485e-140	0.216489	0.352947
FGF15	8.92278e-140	-0.60049	-1.79873
ZSWIM6	1.14475e-139	-0.386457	-1.14086
HOXB9	2.86741e-139	0.000834181	6.89077
CRB3	3.68665e-139	0.0630396	1.45833
FAM181A	4.1175e-139	-0.698039	-3.81687
RPS29	4.51657e-139	0.22421	0.320169
CTNNBIP1	5.49238e-139	-0.304216	-0.575521
ADGRL2	1.16919e-138	-0.381317	-0.777921
LDHA	2.45891e-138	-0.138756	-0.198989
CPVL	3.45878e-138	0.000704947	6.2778
CAR3	4.02333e-138	0.0932021	1.51636
LMX1B	7.66265e-138	-0.538735	-2.50427
EIF1AX	2.21411e-137	0.195661	0.319761
RPL37	3.44686e-137	0.194219	0.274785
ANK2	4.2272e-137	-0.36819	-0.950016
RNF7	1.0748e-136	-0.212014	-0.31638
ROBO1	1.85887e-136	-0.409827	-1.42188
KBTBD11	3.98967e-136	-0.447222	-1.74403
KRTCAP3	1.85486e-135	0.097743	1.47148
TSC22D3	4.26868e-135	-0.343974	-1.15724
DNMT3B	7.20695e-135	0.7913	0.884035
CKS1B	9.17192e-135	-0.204164	-0.303447
NKX6-1	2.73862e-134	-0.826805	-2.89255
MT-ND4	7.32317e-134	0.267672	0.391676
GNAI2	1.47803e-133	-0.191321	-0.283369
ACADL	5.45323e-133	0.271034	0.998228
PGM2	5.72918e-133	0.32337	0.924925
EN2	1.08676e-132	-1.96739	-7.57397
CPN1	1.24112e-132	0.0334091	2.20176
UBQLN2	2.02732e-132	-0.296007	-0.544994
HMGN5	2.50777e-132	0.332305	0.600784
DLEU7	3.23097e-132	0.0471106	1.99665
MSRB1	5.61497e-132	0.279777	0.936423
CBLN1	8.72207e-132	-0.493025	-2.52014
HIPK2	1.04954e-131	-0.333873	-0.776264
SOX12	1.60787e-131	-0.325966	-0.799259
RNASE1	1.81991e-131	0.00422176	4.09931
LIN28B	2.78144e-131	-0.309535	-0.609231
RANGRF	4.57299e-131	0.340358	0.615415
EFNB2	4.94597e-131	-0.437301	-1.16072
MID1	6.04487e-131	-0.381573	-0.948693
RPL37A	1.13087e-130	0.170176	0.243901
C1QL1	1.22548e-130	-0.400247	-1.47798
RPL6L	1.35272e-130	-0.245985	-0.394716
CSN3	1.80399e-130	0.0068933	3.66247
THBS1	1.8086e-130	-0.849651	-3.6329
GLRA2	2.11854e-130	0.00187233	5.06063
GM9493	2.24568e-130	-0.228111	-0.334386
SDC4	3.30881e-130	-0.348262	-1.27112
DGKZ	3.44897e-130	0.242858	0.981604
CDK18	4.25618e-130	0.0387386	1.97616
SHISA8	5.38248e-130	0.101838	1.46853
IFNGR1	9.59341e-130	0.0573556	1.74939
ARF3	1.08238e-129	-0.319073	-0.823654
PSMB10	5.38761e-129	0.327066	0.79469
FLRT1	5.83702e-129	-0.695188	-3.06874
MT-CO2	7.01001e-129	0.22403	0.324311
SFRP1	1.19904e-128	-0.350674	-0.698572
MTHFD2L	1.27493e-128	-0.302582	-0.76121
NRP2	1.36576e-128	-0.634903	-1.74592
DSP	1.97889e-128	0.0846744	1.51542
TSPAN5	2.32002e-128	-0.308782	-0.792776
PPP1R1A	2.53477e-128	-0.319517	-0.753546
SAP30	3.51181e-128	-0.288056	-0.496546
HIP1	9.24771e-128	-0.296766	-0.633891
ASS1	1.50893e-127	0.0265561	2.29233
MIAT	1.53054e-127	-0.427525	-1.73116
HOXB3	4.98093e-127	0.0183034	2.62624
STX3	1.41545e-126	0.189157	1.06464
PLCG2	1.7793e-126	0.0501687	1.8374
AP1S3	4.32095e-126	0.0706915	1.61952
TCAF1	8.60723e-126	-0.330276	-0.833545
HOXB7	1.03223e-125	0.000840566	6.39906
SPRY1	1.06645e-125	-0.461677	-1.7955
SLC16A2	1.42544e-125	0.0932878	1.51538
B230312C02RIK	2.58846e-125	0.504625	0.940542
SYT17	5.38942e-125	0.0271373	2.2548
ARHGEF26	9.0792e-125	0.131031	1.32914
FIGNL2	1.52828e-124	-0.328558	-0.87067
PTK7	1.6439e-124	0.197439	1.01562
NIN	1.76804e-124	0.0625133	1.74786
GCAT	2.79146e-124	0.363106	0.766902
MYO5B	2.93746e-124	-0.72344	-4.28991
TSPO	3.99808e-124	0.361432	0.839656
IKZF2	1.02024e-123	-0.395165	-1.47933
ABCB6	4.16919e-123	0.101806	1.43129
ETNK2	6.44977e-123	0.0239125	2.33761
MIR17HG	7.76334e-123	-0.372278	-0.836944
TLE1	1.10299e-122	-0.341005	-0.939968
NUDC	1.16353e-122	0.198745	0.337379
CHN2	2.07666e-122	0.0904566	1.40221
PAM	3.87905e-122	-0.399838	-1.34404
MRPL28	4.04462e-122	0.21781	0.377249
X2700033N17RIK	4.07852e-122	0.0901188
MOGAT2	4.33758e-122	0.263861	0.962495
PPIC	5.184e-122	0.154986	1.16991
TMEM108	5.184e-122	-0.420897	-1.27772
X9130008F23RIK	1.35318e-121	0.0315502
GPX6	1.50542e-121	0.00573185	3.65931
PGAM1	1.74127e-121	-0.13106	-0.185946
IGF1R	3.16669e-121	-0.326042	-0.691304
RPL9	7.15333e-121	-0.111395	-0.162337
SH3BGRL	3.14615e-120	-0.274359	-0.472294
SLC12A2	4.0034e-120	-0.349184	-1.25529
TAGLN2	4.15436e-120	0.434177	0.775495
EDN1	1.06429e-119	-1.09075	-5.62784
LRRN4	1.28106e-119	0.0606612	1.67887
ERMN	1.37241e-119	-1.0256	-4.59588
ZDHHC12	1.64192e-119	0.240498	0.942012
TNS3	2.35569e-119	0.158414	1.20385
G3BP2	3.63886e-119	-0.203381	-0.297046
VLDLR	1.40364e-118	-0.380396	-1.67299
PRKRA	5.65608e-118	-0.263819	-0.527053
ARF5	6.69225e-118	-0.231653	-0.391749
EEF1AKMT1	1.57974e-117	0.271096	0.530685
PDCD4	1.79072e-117	-0.308885	-0.727221
MT-ND5	2.40948e-117	0.251591	0.385563
ADD3	2.91757e-117	0.328498	0.74927
GM10036	4.35852e-117	-0.25157	-0.390424
TNFRSF19	6.52685e-117	0.373767	0.769104
GM2000	3.29825e-116	-0.221081	-0.32698
KMT2E	4.99146e-116	-0.323456	-0.801947
HAGLR	7.75723e-116	0.0127568	2.8323
POLR2I	8.52665e-116	0.228836	0.416825
TCF15	9.56531e-116	0.064179	1.5892
F11R	1.52727e-115	0.198823	1.05057
GNB2	1.69938e-115	-0.237804	-0.380734
CBY1	2.11971e-115	0.293287	0.616916
MAPK12	3.77224e-115	-0.304983	-0.841897
PCDH1	1.43922e-114	0.119611	1.28753
TLX2	1.77095e-114	0.00744987	3.45612
RPL36	2.05504e-114	0.149513	0.217931
X5330434G04RIK	2.19168e-114	-0.366083
P4HA1	2.49619e-114	-0.312871	-0.728286
TDRD7	3.28298e-114	-0.440249	-2.65177
PCDH17	3.39823e-114	-0.837059	-4.54975
FZD10	3.9122e-114	0.159346	1.21935
ARHGEF5	4.02206e-114	0.0238144	2.32879
TMEM51	4.8017e-114	0.0516114	1.72383
NDUFS7	6.72648e-114	0.232436	0.425892
EFNB1	6.85807e-114	0.413767	0.867166
PHB	1.84937e-113	0.291724	0.566716
CAR2	2.14268e-113	0.219417	0.980778
MTSS1	2.96374e-113	-0.356792	-1.09474
CLDN6	3.74127e-113	0.0826317	0.590032
MSRB2	1.07918e-112	0.0702499	1.54008
ENC1	2.40217e-112	-0.378528	-1.298
ETFA	2.44132e-112	0.283511	0.84972
YWHAE	2.74778e-112	-0.128536	-0.185769
N4BP2	3.40473e-112	-0.315636	-0.683105
HSD11B2	4.74158e-112	-0.500168	-1.9141
EIF2S2	5.52469e-112	0.164359	0.259095
FAM162B	1.29831e-111	0.0218117	2.50932
NOVA2	1.38284e-111	-0.369323	-1.93826
FAM49B	3.90218e-111	-0.262117	-0.465166
FAM117A	3.97882e-111	0.16668	1.09401
DPYSL3	4.2139e-111	-0.337372	-1.1861
FJX1	5.08702e-111	-0.351321	-0.797152
AGTRAP	5.62021e-111	0.13734	1.17372
BAZ1A	5.74626e-111	0.386455	0.839594
ACRBP	7.04958e-111	0.168059	1.11058
PLA2G16	1.11005e-110	0.141677	1.15545
GLRX	1.32858e-110	-0.381533	-1.31249
NDRG2	1.78206e-110	0.0669822	1.30228
TCF7	2.36613e-110	0.17701	1.07028
MT-CYTB	2.65092e-110	0.242793	0.350039
GM12576	3.26869e-110	0.00282944	4.34341
ATPIF1	3.8474e-110	0.196206	0.301334
SAMD1	8.44211e-110	-0.301843	-0.699729
X3632451O06RIK	1.11939e-109	-0.355126
TUBA4A	1.28002e-109	0.0563691	1.58457
CTDSP2	3.24295e-109	0.327713	0.763831
POR	4.43093e-109	0.268268	0.858318
ADGRV1	1.62278e-108	-0.362079	-1.47807
LYAR	1.84448e-108	0.208068	0.339713
SPINT2	2.61426e-108	0.341323	0.838395
IRF2BP2	4.24737e-108	-0.338306	-1.07275
AMER2	4.42773e-108	-0.363365	-1.80106
GREM1	6.46205e-108	-0.87073	-4.60561
DPYSL4	6.67909e-108	-0.395816	-2.15897
CDH20	8.5267e-108	-0.598942	-4.08932
DPYSL5	9.59014e-108	-0.316177	-0.881732
YDJC	1.68781e-107	0.173579	1.07186
CRB2	2.12699e-107	-0.339248	-1.33354
TDRKH	2.55969e-107	-0.33716	-1.30007
MAF	3.19655e-107	-0.917471	-3.49656
NSG2	3.21565e-107	-0.414875	-1.81971
T	3.3909e-107	0.0157358	3.12055
KLHL13	3.46618e-107	-0.333536	-1.24543
SOX3	4.39218e-107	0.384284	0.677703
BCL2L11	8.27391e-107	-0.320165	-0.837265
HOXB5	1.00219e-106	0.000993125	5.8628
LHX1	1.55748e-106	0.0086028	3.37661
AP1M2	2.76245e-106	0.0750377	1.21742
GAREM2	2.81419e-106	-0.538413	-3.86996
NCL	2.887e-106	0.202225	0.312014
PHGDH	2.93178e-106	0.304619	0.560437
CNPY2	2.97018e-106	0.235165	0.441298
KIRREL	3.0249e-106	-0.342213	-1.46329
C430049E01RIK	4.40875e-106	0.0442099	1.80699
ADGRL1	6.18327e-106	-0.314137	-0.986226
RP23-145I16-5	6.63722e-106	0.0270067
LIMD2	7.88977e-106	-0.244927	-0.429908
GMFG	1.01495e-105	0.125028	1.1301
HIST1H2AP	3.52567e-105	0.926593	1.17416
IFI30	7.4881e-105	0.220323	0.90555
ATP6V1G1	1.59791e-104	-0.190201	-0.301314
EIF4EBP1	2.33339e-104	0.257109	0.447317
COMT	2.82464e-104	0.370813	0.714703
FOXP4	3.66093e-104	-0.316225	-1.07834
SPRY2	3.67948e-104	-0.465413	-1.35473
DACH1	7.60825e-104	0.0841347	1.27033
GOLIM4	8.00697e-104	-0.296755	-0.737471
SEMA6A	8.65612e-104	0.208728	1.0794
CSNK1E	1.72313e-103	-0.248432	-0.443052
CD164L2	1.86834e-103	0.0180257	2.39588
TIMP3	2.38216e-103	-0.638641	-2.89791
IVNS1ABP	3.20209e-103	-0.260743	-0.437964
KCNK1	3.56028e-103	0.199954	0.990347
ISYNA1	3.70332e-103	0.35044	0.701051
HEXB	4.4267e-103	0.0783185	1.42974
POU3F3	4.80379e-103	-0.828659	-5.40031
TULP4	5.56757e-103	-0.29613	-0.755617
ARHGAP5	5.95065e-103	-0.260881	-0.47674
FAM136A	9.91388e-103	-0.207468	-0.328283
GJC1	1.00962e-102	-0.260225	-0.495759
LY6E	1.47965e-102	0.46363	0.719593
TNRC18	2.00668e-102	-0.341419	-0.979879
KIF20A	3.20316e-102	0.361684	0.750239
POLR2M	3.4433e-102	-0.197893	-0.302083
CACNG4	4.99846e-102	-0.361583	-1.31936
PDHA1	9.77853e-102	-0.280367	-0.470005
LRPAP1	1.76548e-101	0.313554	0.719663
COMMD3	2.45886e-101	0.291307	0.769409
IGFBP4	7.52955e-101	-0.294629	-0.674339
OGT	8.76346e-101	-0.285728	-0.559172
MEX3B	9.34806e-101	-0.338568	-0.932125
FOXD1	9.86319e-101	-1.04349	-3.50901
PAX6	1.05987e-100	-0.574408	-1.33859
TSPAN6	1.20357e-100	-0.242771	-0.412897
ADGRL3	1.44892e-100	-0.370185	-1.59217
RGMB	2.38917e-100	-0.358475	-1.63553
ZBTB12	2.89398e-100	-0.239711	-0.437943
PCDH18	3.01482e-100	-0.350125	-1.19734
PDZK1	3.2604e-100	0.0102437	2.98853
KRTCAP2	3.84809e-100	0.191345	0.312859
CST3	4.09651e-100	-0.229845	-0.359767
SLC1A3	5.5118e-100	0.175008	1.04078
PAFAH1B2	5.60408e-100	-0.243119	-0.448816
TRAPPC4	6.82909e-100	-0.203993	-0.331454
CAR4	8.54527e-100	-0.278406	-0.616648
DNAJC19	1.04553e-99	0.220075	0.40112
CPSF6	1.15284e-99	-0.235661	-0.381594
SLC9A3R1	1.94318e-99	0.394226	0.674504
PLAGL1	2.23609e-99	0.0658556	1.15982
HNRNPA1	2.67047e-99	-0.124624	-0.177875
ERBIN	3.16447e-99	-0.328009	-1.1787
TUBB6	5.3482e-99	0.212777	0.939425
LRP2	5.40006e-99	-0.344343	-0.953336
UQCR11	6.36529e-99	0.17976	0.289505
CBX7	7.48627e-99	0.092101	1.27244
PRELID2	9.77198e-99	-0.272874	-0.647085
LSAMP	1.09824e-98	-0.387531	-2.30364
EIF2S3Y	1.25372e-98	-0.334911	-1.00641
MTCL1	1.91543e-98	-0.308447	-0.737351
HNRNPH3	3.16477e-98	-0.214553	-0.331882
COX7A2	4.45585e-98	0.138969	0.211593
FOXD4	4.92452e-98	-0.508645	-1.93965
ZFP800	5.57463e-98	-0.323551	-1.09133
ITGB5	8.54355e-98	0.171304	0.962777
JAKMIP2	1.06353e-97	-0.310684	-1.13491
TMEM98	1.17418e-97	0.0851501	1.31695
SLC35G2	1.23948e-97	0.0312751	1.92801
FMNL2	1.81555e-97	-0.299873	-0.833373
PCNT	2.33654e-97	0.332484	0.83272
PRSS23	8.71112e-97	-0.416848	-1.90267
MBP	3.10983e-96	0.134497	1.11659
BCL11A	3.62481e-96	0.0296811	1.92649
RTN3	6.31325e-96	-0.21484	-0.32776
GM26917	9.47064e-96	-0.368163	-0.611582
CLIC1	9.63229e-96	-0.23477	-0.415634
SCUBE1	1.4449e-95	-0.415598	-1.65263
RPL13-PS3	1.53633e-95	-0.205291	-0.320089
ARPP19	2.92706e-95	0.176354	0.302866
CECR2	3.40465e-95	-0.247107	-0.449579
FEZF2	3.4353e-95	-0.763878	-3.65157
SNN	3.63444e-95	-0.282908	-0.78219
RARG	5.83143e-95	0.15708	0.999686
ZFP521	9.92526e-95	-0.312595	-1.05195
TIMM8B	1.03754e-94	0.185148	0.309294
MATR3	1.28246e-94	-0.209673	-0.303589
HOXA4	1.38154e-94	0.0013215	5.05975
RRAGB	1.49013e-94	-0.322527	-0.898886
RASAL2	2.33254e-94	-0.29666	-0.93465
MPV17L2	2.73463e-94	0.155879	0.994184
CLDN7	3.254e-94	0.0764487	1.07245
VANGL1	5.64058e-94	0.0994852	1.28455
ITGB8	5.65469e-94	-0.40097	-2.24813
EXOSC2	6.46426e-94	0.444759	0.748224
CLU	1.16088e-93	-0.357223	-1.74268
RFX3	3.09363e-93	-0.311656	-1.03921
CNBP	4.43965e-93	-0.171515	-0.24839
SRP14	8.29842e-93	-0.175794	-0.265252
RCN2	1.03574e-92	-0.241516	-0.427901
MTAP7D3	1.12111e-92	0.223361	0.862989
KIF1B	1.52932e-92	-0.268576	-0.500488
CAPG	2.61773e-92	0.0878126	1.15193
RPL41	3.24467e-92	0.124418	0.175105
HOXA2	4.73767e-92	0.0460679	0.0510079
CLDN3	5.65617e-92	0.0342297	1.80829
SP8	6.77955e-92	-0.296575	-0.764188
MORF4L2	1.51868e-91	-0.222738	-0.320374
PFN1	1.8154e-91	-0.144508	-0.201191
PARP1	2.00443e-91	0.21319	0.381281
IMPA2	2.18775e-91	0.144137	1.03049
GM27032	3.40619e-91	-0.343726	-1.68438
FGFR1	4.01624e-91	0.389562	0.579947
RBM3	4.21089e-91	-0.169355	-0.234902
NRG1	4.436e-91	-0.542599	-2.6859
GDF10	1.4905e-90	-0.481191	-2.4853
SALL1	2.22695e-90	-0.300425	-0.81637
SELENOS	2.59788e-90	0.296229	0.525725
PODXL2	2.90351e-90	-0.326174	-1.91224
ISOC1	3.19028e-90	-0.24863	-0.558519
CDC42EP1	5.17403e-90	0.0193396	2.3238
IFITM3	5.61322e-90	-0.3247	-0.940496
GNAS	7.02965e-90	-0.154406	-0.220829
AP3B2	1.04041e-89	0.0211601	2.17898
WSB1	1.06315e-89	-0.264793	-0.609554
RBMS2	1.19321e-89	-0.248963	-0.612198
TAL2	1.34707e-89	-0.351379	-1.23982
HMGB3	1.61765e-89	-0.181524	-0.257957
TTR	2.13225e-89	0.0372331	1.93521
ANP32B	2.20172e-89	0.124852	0.185395
ATP5E	2.38517e-89	0.161291	0.244732
LARGE2	2.50633e-89	-0.308633	-1.1263
DMRT3	3.02916e-89	-0.722161	-4.42842
WFDC2	4.81918e-89	0.441364	0.651797
TPI1	6.36916e-89	-0.134966	-0.194944
HNRNPF	8.07663e-89	-0.177847	-0.251032
LSR	1.20853e-88	0.344975	0.637361
MESDC2	1.27953e-88	0.26772	0.496294
GAP43	1.57604e-88	0.225041	0.908867
TMTC2	2.18259e-88	-0.527617	-3.3182
APPL1	3.12266e-88	-0.25851	-0.589259
SYNE2	4.01425e-88	-0.283838	-0.807156
VGLL4	4.2933e-88	-0.291913	-0.974534
EPHB2	6.36624e-88	-0.301135	-0.98973
ZSCAN10	1.14424e-87	0.148122	0.836661
SGK1	1.14424e-87	0.0477225	1.64085
MT-ND2	1.15812e-87	0.218703	0.319605
MYEF2	1.23249e-87	-0.24263	-0.426831
HNRNPK	1.7963e-87	-0.143271	-0.199439
GNG5	2.01224e-87	-0.116003	-0.17628
ETFB	3.70503e-87	-0.238	-0.464997
PELI1	4.76532e-87	-0.256082	-0.547072
LCORL	6.26012e-87	-0.30292	-0.985747
CETN3	6.37297e-87	-0.202617	-0.306114
PDZRN3	6.42257e-87	0.120822	0.958405
EMILIN2	6.87147e-87	-0.369306	-2.19534
IDH3A	8.69053e-87	0.256689	0.533622
CCDC28B	1.02952e-86	0.26837	0.706415
WNT4	1.45531e-86	-0.421944	-2.35223
HIST1H2AK	1.46408e-86	0.550019	0.920282
NKX2-9	1.47736e-86	-1.22937	-3.93904
TAC1	1.49017e-86	-0.759683	-5.30782
X2610027F03RIK	2.24207e-86
PLS3	3.3462e-86	-0.270862	-0.484146
TTC39B	3.79864e-86	0.00928893	2.77991
KRT5	4.19304e-86	0.00243024	4.42418
RND3	4.4759e-86	-0.290547	-0.807011
SLC7A5	4.95472e-86	0.0775148	1.26234
PIN4	5.21366e-86	0.203222	0.396225
SPINK1	9.01056e-86	0.0893923	1.1763
KRIT1	1.06718e-85	-0.249917	-0.542388
PLAGL2	1.20688e-85	-0.280944	-0.723441
PDZD2	3.34107e-85	-0.39719	-2.30947
HNRNPH1	3.52943e-85	-0.210816	-0.305915
BTF3L4	3.55003e-85	-0.195586	-0.302343
LY6H	4.1389e-85	-0.343544	-2.06312
WDR83OS	5.3313e-85	-0.225161	-0.422641
KHDRBS3	5.4607e-85	-0.243717	-0.428836
FXYD6	7.54153e-85	-0.23791	-0.478762
TMEFF1	9.13487e-85	-0.246925	-0.492997
KRT8	1.21163e-84	0.203611	0.795017
EEF1E1	1.23446e-84	-0.224213	-0.386926
SERTAD2	1.44445e-84	-0.26842	-0.851305
HES1	1.7443e-84	-0.350695	-0.727296
NPTX2	1.84266e-84	-0.328284	-1.29354
SLC25A39	2.08958e-84	0.255073	0.494031
UBE2K	2.14841e-84	-0.22706	-0.332019
ARF4	2.25731e-84	-0.208014	-0.338992
UTF1	2.34803e-84	0.0524986	1.07222
GM266	2.35759e-84	-0.36508	-2.33349
CIAPIN1	3.11909e-84	0.204157	0.402354
PAX3	4.1124e-84	-0.575219	-1.69657
MPZL2	4.61474e-84	0.0286351	1.90161
CNOT7	8.64708e-84	-0.229188	-0.465717
ARHGAP20	1.15367e-83	0.00692717	2.88909
IPO5	2.25862e-83	-0.212006	-0.288406
NDUFB9	2.9589e-83	0.167372	0.278441
MAPK11	3.01446e-83	-0.282316	-1.44613
LETM1	3.36624e-83	0.267523	0.630501
CLDN10	3.92022e-83	-0.499473	-2.50524
CAPSL	5.56823e-83	0.042763	1.55377
UNC119	6.01431e-83	-0.218213	-0.432023
PRRX2	6.64332e-83	-0.303394	-1.14874
SIVA1	1.09784e-82	0.157208	0.242593
FSD1L	1.16113e-82	-0.287397	-1.09314
EZR	1.28994e-82	0.61202	0.665786
SERPINF1	1.52e-82	0.0175522	2.21441
ZDHHC2	2.36919e-82	0.192212	0.871526
SAMD14	3.37136e-82	-0.277643	-1.39198
OTX2OS1	3.89205e-82	-0.696548	-6.49953
TSPAN17	4.01751e-82	0.0264655	1.80852
SEC61B	5.20002e-82	-0.13261	-0.192234
RAP2A	5.40079e-82	-0.267163	-0.761347
HES7	6.03509e-82	0.00881134	3.29046
ZWINT	7.78529e-82	-0.21116	-0.345368
CYB5R3	7.79646e-82	-0.220227	-0.383972
SELENOW	9.66299e-82	-0.175908	-0.29422
COX6A1	9.68262e-82	0.177446	0.327475
SOX6	1.04758e-81	-0.539498	-3.60424
ARHGAP24	1.11902e-81	0.0793415	1.29774
X1700011H14RIK	1.13983e-81	0.0184821
CASP3	1.6043e-81	0.254505	0.499713
IGDCC3	2.33325e-81	0.14291	0.128255
GPX7	3.16292e-81	0.189485	0.863365
RUFY3	3.18341e-81	-0.294119	-0.994418
FXN	3.27631e-81	0.26604	0.561812
FAM204A	4.02721e-81	-0.228144	-0.468982
SPR	6.6568e-81	0.267447	0.586274
NUAK1	6.93761e-81	-0.365819	-1.88839
X2700046A07RIK	9.34639e-81	-0.663953
BOLA3	1.3611e-80	0.21969	0.43836
TM9SF4	1.44606e-80	-0.250192	-0.591275
PLK4	1.55098e-80	0.367849	0.643801
GSK3B	1.89046e-80	-0.222826	-0.38182
MSI1	1.92977e-80	-0.250785	-0.50297
ITM2B	2.07305e-80	0.324317	0.602483
MYC	2.30419e-80	-0.303131	-1.10736
PLCH1	2.66066e-80	-0.282405	-0.828304
CENPW	2.92263e-80	0.205046	0.397047
MN1	3.13196e-80	-0.323158	-1.03692
LRRTM3	3.18681e-80	-0.414741	-2.42623
ZYX	4.47584e-80	0.25941	0.730448
CTPS2	4.61392e-80	0.109675	1.0362
MAPKAPK2	4.80798e-80	-0.263387	-0.801672
TAB2	5.24655e-80	-0.250622	-0.521195
ZFP36L1	6.54639e-80	-0.289524	-0.4678
UTY	6.83258e-80	-0.301853	-1.31569
NFE2L2	6.93335e-80	0.212365	0.815435
GNPNAT1	7.35802e-80	0.234926	0.731737
HSPG2	1.0551e-79	0.0745993	1.20689
TCF3	1.56718e-79	-0.200252	-0.335238
ZFP36L2	1.93624e-79	0.219724	0.842612
X2700081O15RIK	3.35875e-79	-0.270441
GPBP1	3.58453e-79	-0.225358	-0.400107
IER5	4.37612e-79	-0.29152	-0.974185
CAPRIN1	5.21909e-79	-0.214224	-0.302326
EVL	5.89014e-79	-0.219129	-0.437767
NDUFA10	7.91611e-79	0.218692	0.425233
ATP5J2	8.20171e-79	0.137089	0.210238
SMARCC1	8.54287e-79	-0.191835	-0.272149
ZDHHC20	8.88021e-79	-0.257886	-0.695226
FKBP11	1.58108e-78	0.334304	0.645125
FAM171A2	1.88522e-78	-0.260327	-0.93134
AVPI1	1.88895e-78	0.209853	0.762573
IGSF9	1.95059e-78	-0.262262	-0.797829
MT-ND4L	3.05817e-78	0.211053	0.327648
F2RL1	3.40272e-78	0.0126684	2.48387
SMARCA2	3.43057e-78	-0.251094	-0.678971
ATP5O	3.99132e-78	0.17096	0.279579
PIPOX	4.27593e-78	-0.270804	-1.34558
NDUFA2	5.36236e-78	0.159503	0.264155
ANXA11	6.09242e-78	0.060192	1.302
ZFP462	6.90331e-78	-0.253996	-0.494672
CABP7	7.70487e-78	0.0458206	1.63276
FOXB1	9.06312e-78	-0.104558	-0.345044
CNTFR	1.24036e-77	0.304136	0.651547
KDM5D	2.90323e-77	-0.292919	-1.23363
PEBP1	3.19381e-77	-0.116372	-0.167931
GIPC1	3.62913e-77	-0.218217	-0.455047
EXOC5	3.83363e-77	-0.253817	-0.615523
SRP9	4.60557e-77	-0.188081	-0.285329
PPDPF	5.10773e-77	0.20192	0.387022
IRX5	5.44938e-77	-0.201127	-0.50386
CD24A	8.84472e-77	0.504399	0.469483
TIA1	1.03183e-76	-0.217553	-0.399691
MTA1	1.05389e-76	-0.201378	-0.342807
CYB5R1	1.06727e-76	0.185973	0.818589
SOX1	1.48768e-76	-0.329465	-0.745087
KIT	1.62163e-76	0.165835	0.941751
BOLA2	2.08648e-76	0.18164	0.30737
ARX	2.15536e-76	-1.58681	-8.18104
ACSL6	2.57583e-76	0.0677437	1.28428
GOLGA3	2.74929e-76	0.34452	0.905806
H19	2.94237e-76	0.20693	0.791231
CCNG1	3.44879e-76	0.207565	0.843051
PYCARD	3.8773e-76	0.157996	0.921963
CNN3	5.00632e-76	-0.189261	-0.29593
RFLNB	5.18054e-76	-0.269192	-0.91639
CBR1	6.24874e-76	0.277936	0.571506
RPS21	6.81813e-76	0.136159	0.19353
EPHA5	7.07137e-76	0.0317901	2.01416
ELOF1	8.64714e-76	0.167611	0.304317
TMEM132E	1.08342e-75	0.0153735	2.2431
HIST1H4H	1.31515e-75	0.168275	0.96112
MAPK10	1.32359e-75	-0.565581	-3.68726
NLGN2	1.45875e-75	-0.262375	-1.13164
EDARADD	1.83562e-75	-0.560335	-3.49372
FAM216A	2.39803e-75	-0.233946	-0.549562
DPH3	2.79512e-75	0.186172	0.352394
F2R	2.80284e-75	-0.259811	-0.697463
COPZ2	2.83508e-75	-0.279583	-1.54712
BAZ2B	2.86651e-75	-0.258918	-0.572073
PLEKHG1	3.30638e-75	-0.397478	-2.88528
RHBDL3	3.57673e-75	0.0242441	1.88865
OTUB1	3.76133e-75	-0.209554	-0.372417
PAPSS1	3.81552e-75	-0.230583	-0.519598
LRRK2	4.10978e-75	0.0124443	2.40951
ALG13	7.2217e-75	0.221656	0.748068
DDX3Y	7.74378e-75	-0.300318	-0.981668
ANO1	8.04707e-75	-0.438706	-3.26244
EBF1	8.10199e-75	0.153851	1.00609
CRIP1	8.20671e-75	0.188967	0.820586
BAK1	8.51378e-75	0.237572	0.657254
SERBP1	9.54111e-75	0.0983851	0.150195
SCOC	1.13984e-74	-0.215422	-0.397521
ADGRG1	1.56617e-74	-0.348593	-2.69247
SCRN1	1.60378e-74	-0.311022	-1.98967
CD9	1.65829e-74	-0.248046	-0.587058
CALM2	1.92279e-74	-0.12978	-0.184786
APOOL	1.98936e-74	-0.23217	-0.578902
POP5	2.06283e-74	0.218195	0.429017
NRP1	3.47295e-74	-0.357972	-2.10959
EEF1A1	3.47787e-74	-0.139373	-0.192257
UBE2H	3.49536e-74	-0.262626	-0.84996
NRARP	4.07039e-74	-0.328562	-1.96321
DMBX1	6.10539e-74	-0.625262	-4.25196
X1190007I07RIK	7.08923e-74	0.235435
NKTR	7.27005e-74	-0.22347	-0.386895
EWSR1	7.47383e-74	-0.18496	-0.269624
SKIDA1	7.47856e-74	-0.276042	-0.801332
SYT3	7.76736e-74	0.0405154	1.49976
TUBA1B	1.23969e-73	-0.145589	-0.197262
KIF1A	1.2535e-73	-0.260488	-1.16486
FOXG1	1.35215e-73	-1.82273	-8.07528
D1ERTD622E	1.4302e-73	-0.281243	-1.39098
YWHAZ	2.24636e-73	-0.190871	-0.272086
GM5218	2.42688e-73	-0.170418	-0.245002
NPEPPS	2.60098e-73	-0.223256	-0.423365
UBE2D1	4.8342e-73	-0.207423	-0.403126
ADPRH	5.09006e-73	-0.195299	-0.372272
ETV5	5.95839e-73	0.101063	1.08481
NKX6-2	7.20625e-73	-0.726634	-3.11167
RPS8	7.72967e-73	0.0799748	0.112103
LRRC4B	9.23774e-73	-0.263014	-1.46959
COX20	1.24344e-72	0.265702	0.606228
MEX3D	1.27586e-72	-0.244374	-0.670016
CTSZ	2.60234e-72	0.257426	0.491093
EPHA2	2.62671e-72	0.0227922	2.25457
B4GALNT4	2.88758e-72	-0.250889	-0.865435
MRPS24	3.02012e-72	0.190176	0.373635
ZKSCAN3	3.26686e-72	-0.23158	-0.514556
SREK1	3.35923e-72	-0.194403	-0.318659
ASPSCR1	3.41508e-72	0.235215	0.582203
FUBP1	3.47407e-72	-0.146399	-0.202444
ZIC5	3.61578e-72	0.173329	0.301987
NASP	4.77108e-72	0.146031	0.231863
LMO7	5.69793e-72	0.0534604	1.30901
ATR	6.25594e-72	-0.254692	-0.688356
GNB1	6.43612e-72	-0.163651	-0.243262
EPHA4	7.20194e-72	0.369159	0.791718
RPS27	9.25495e-72	0.141297	0.207536
DDT	9.77821e-72	0.204762	0.35027
GM5786	1.03582e-71	-0.223359	-0.553457
PPP3CA	1.18953e-71	-0.255668	-0.774334
GRTP1	1.32157e-71	-0.243844	-0.921597
TRIM8	1.41365e-71	-0.254565	-0.678153
SPC25	1.58076e-71	0.31605	0.560794
KDM3A	1.6441e-71	-0.260301	-0.70701
UBE2R2	2.08826e-71	-0.163823	-0.247147
TMTC4	2.1025e-71	-0.258101	-1.25741
MLLT11	2.25202e-71	-0.24491	-0.927626
IRF2BPL	2.40721e-71	-0.301256	-1.06701
RBM15B	3.91092e-71	-0.228464	-0.530555
MOBP	5.43589e-71	0.0113314	2.41796
FRAT2	5.66979e-71	-0.249416	-0.633474
LGR4	6.78371e-71	-0.283422	-1.04623
WWC1	7.73373e-71	-0.244264	-0.633009
SAMD5	8.04183e-71	-0.471562	-3.27752
GM8797	1.55857e-70	-0.217588	-0.323368
NRXN3	1.74255e-70	-0.341773	-2.63628
NDNL2	1.99552e-70	-0.202628	-0.373399
AGO1	2.24997e-70	-0.248602	-0.726495
MTCH1	2.38463e-70	-0.18087	-0.310654
SASH1	3.81381e-70	-0.256244	-0.810265
FNDC5	5.16543e-70	0.0258524	1.77064
KLK8	5.21276e-70	-0.22479	-0.491158
TFE3	5.33369e-70	0.214811	0.767599
MRPL4	5.61804e-70	0.253852	0.489324
MED13L	5.79806e-70	-0.253006	-0.76733
SLC16A13	7.18973e-70	0.127692	0.940441
DNMT3A	7.67991e-70	0.26591	0.671427
HADHB	1.13391e-69	0.154963	0.855388
DRAP1	1.3451e-69	-0.170597	-0.254785
YPEL1	1.4352e-69	-0.224084	-0.542798
GM45009	1.52179e-69		-26.0422
SH3RF1	1.62128e-69	-0.261487	-1.04774
RPL24	2.04674e-69	0.073291	0.103748
HNRNPR	2.17419e-69	-0.167105	-0.248965
RPSA	2.61228e-69	-0.079738	-0.120398
FABP3	2.63764e-69	0.0780684	1.09766
STMN2	2.81027e-69	0.598457	0.58817
SEMA5B	2.81603e-69	-0.274372	-1.86462
SEZ6	2.87162e-69	-0.457815	-3.63762
SLIRP	2.9507e-69	0.185002	0.358006
CYP26A1	3.30464e-69	-0.276872	-1.52194
TLN1	3.98818e-69	0.235728	0.548503
GLRA1	3.99101e-69	0.0137406	2.53156
BDNF	4.90097e-69	-0.295186	-1.92575
DMRTA2	5.06355e-69	-0.470054	-2.96517
DDX18	5.15905e-69	0.179215	0.330399
MRPL35	5.1753e-69	0.187423	0.392245
CCDC50	5.67524e-69	-0.21052	-0.360931
RP9	6.00287e-69	0.266707	0.606918
IGF2BP1	8.39931e-69	-0.186966	-0.257875
ATRX	9.15249e-69	-0.202397	-0.290953
CDH4	1.08782e-68	-0.259767	-1.24924
SPATS2	1.10882e-68	-0.207329	-0.377816
PPM1L	1.10882e-68	-0.257379	-1.06086
MFAP2	1.31964e-68	-0.229223	-0.579645
SDCBP	1.76571e-68	-0.211218	-0.450936
UQCRC1	1.80515e-68	0.206799	0.398244
AXIN2	1.98343e-68	0.216204	0.41556
MRPL51	2.35115e-68	0.177916	0.344574
CFL1	2.75522e-68	-0.113389	-0.153902
GOLGA7	2.75742e-68	-0.197152	-0.388378
RNH1	3.33799e-68	0.237204	0.678306
PTF1A	5.15595e-68	0.000652841	5.51845
MED30	5.89096e-68	-0.194347	-0.332587
TNFAIP8	5.91638e-68	-0.235103	-0.553581
RPS4X	7.73566e-68	-0.0941589	-0.140957
DCLK1	8.36015e-68	-0.263934	-1.58031
MRPS26	1.03647e-67	0.213241	0.438182
TBL1XR1	1.07266e-67	-0.240426	-0.647962
MAGEL2	1.36445e-67	-0.287896	-1.75511
CHD9	1.89146e-67	-0.254324	-0.781997
DHCR24	2.15591e-67	0.259595	0.680309
PHIP	2.17675e-67	-0.201301	-0.311592
MRPS25	2.18281e-67	0.192833	0.389474
LFNG	2.52529e-67	-0.264769	-1.1789
SRGAP3	2.6519e-67	-0.263696	-1.13081
FAM195B	2.77158e-67	-0.195146	-0.372992
NOTUM	2.82262e-67	0.0296598	1.75551
SNX10	2.88201e-67	-0.229142	-0.577082
NDUFS8	3.03777e-67	0.201389	0.43051
NYNRIN	3.37941e-67	-0.236458	-0.775401
HP1BP3	4.87711e-67	-0.237545	-0.582641
GSTM5	5.51623e-67	-0.218023	-0.379959
RSRP1	5.74841e-67	-0.196442	-0.320072
CCNE1	6.24294e-67	0.284143	0.499044
TLCD1	6.67046e-67	0.193517	0.750979
LDB1	6.92341e-67	-0.218712	-0.447521
AHI1	1.09003e-66	-0.226772	-0.560941
WNT8B	1.09087e-66	-1.00481	-4.44142
SNX3	1.45543e-66	0.178395	0.357759
RPS28	1.53403e-66	0.130977	0.190916
BSPRY	1.61414e-66	0.0287015	1.62979
BC024139	1.76426e-66		-25.6558
RPS13	2.638e-66	0.071471	0.104501
CDKN1C	2.8674e-66	-0.313595	-0.654844
PLP1	2.87768e-66	-0.282167	-1.05926
DCUN1D1	3.08984e-66	-0.217787	-0.465637
AKR1B3	3.34633e-66	0.211177	0.414372
GM16286	3.47209e-66	-0.172146	-0.267032
TMEM128	4.52023e-66	-0.188893	-0.355527
SEMA6D	4.56911e-66	-0.342285	-2.65426
SSRP1	4.93821e-66	0.164963	0.305089
MAP2	5.41852e-66	-0.305338	-1.52885
COL4A1	5.91009e-66	0.274913	0.663512
MRPS36	6.56388e-66	0.163456	0.305691
GPX1	8.93186e-66	0.155956	0.276212
ALDH1A2	1.00468e-65	0.0441347	0.111925
CHMP4C	1.47676e-65	0.0356555	1.57276
ABCF1	1.5054e-65	0.164123	0.318031
ATXN10	1.50838e-65	-0.166917	-0.231905
PTP4A1	1.51273e-65	-0.195991	-0.322462
PLOD2	1.64217e-65	-0.235657	-0.555783
CYP4X1	2.13393e-65	0.138455	0.935605
TNS1	2.31361e-65	0.0258015	1.69106
CEP170B	2.32357e-65	0.084504	1.05716
WNT7B	2.60521e-65	-0.874297	-5.5363
RPL35A	2.91105e-65	0.0941092	0.136252
X2410080I02RIK	3.09238e-65	0.0163357
DDR1	3.24786e-65	-0.23753	-0.724926
RASD2	3.27414e-65	0.0152905	2.16393
GTF2IRD1	3.68908e-65	-0.223305	-0.545611
EFEMP2	3.8417e-65	0.0749887	1.08207
SFRP2	4.32421e-65	-0.233284	-0.452168
PLK3	4.50675e-65	0.02414	1.76454
PTPRA	5.03526e-65	-0.212515	-0.524671
UGDH	5.76251e-65	-0.216752	-0.532015
ADAMTS9	9.32311e-65	-0.257517	-1.33423
TSG101	1.04115e-64	-0.169822	-0.267299
CARNMT1	1.23264e-64	0.18678	0.39095
MAPK1IP1L	1.28678e-64	-0.211698	-0.394797
RHOA	1.33113e-64	-0.142677	-0.211391
ARMCX3	1.3391e-64	-0.231016	-0.642183
ZFP397	1.4039e-64	-0.219148	-0.577553
G630016G05RIK	1.57477e-64	0.0256101	1.76966
RPL27-PS3	1.62359e-64	-0.157148	-0.22475
PLXNC1	1.75494e-64	-0.254357	-1.30356
ACSL3	1.78423e-64	0.27563	0.612128
RAPH1	2.64386e-64	-0.240284	-0.594135
PCM1	2.88179e-64	-0.191119	-0.281701
RTN1	3.4148e-64	-0.260772	-0.860766
CTBP2	3.62199e-64	0.244036	0.51638
SNHG6	3.7824e-64	-0.201422	-0.383047
LTBP1	3.91124e-64	-0.248027	-1.05465
YBX1	4.00166e-64	-0.0839633	-0.119348
ZFP280D	4.14318e-64	-0.218135	-0.411421
IRX2	4.30661e-64	-0.217533	-0.81921
CCND2	4.93907e-64	0.606462	0.513195
GM26735	5.52705e-64	-0.240359	-0.888883
RNF130	6.47066e-64	-0.226186	-0.580167
BDH1	6.87522e-64	0.0496693	1.32075
X2010111I01RIK	6.92263e-64	0.0459294
RXRG	7.56232e-64	0.0602102	1.30159
HIST1H2AE	7.73058e-64	0.350274	0.638182
BAIAP2L1	8.14436e-64	0.178524	0.77813
EYA1	8.24883e-64	-0.28066	-2.12353
DTNA	8.59811e-64	-0.310524	-2.37706
PID1	9.3517e-64	0.0673611	1.12389
RPL35	9.91777e-64	0.168272	0.246484
PHB2	1.02609e-63	0.146901	0.249725
PTPRN2	1.0349e-63	-0.27055	-1.9842
AKAP11	1.39174e-63	-0.238167	-0.631362
ZMYND11	1.63955e-63	-0.215089	-0.415382
RBFOX3	1.75368e-63	-0.261637	-1.59812
AGPAT2	1.7788e-63	0.0961693	1.03861
PBRM1	1.88839e-63	-0.195673	-0.283329
PTPRS	2.14225e-63	-0.213827	-0.488164
X9530068E07RIK	2.25038e-63	-0.205607
FAM213B	2.98131e-63	-0.219181	-0.72233
ENDOG	3.62753e-63	0.187434	0.712983
TCEAL1	3.77292e-63	-0.223022	-1.02896
TMA7	4.01888e-63	0.111636	0.175983
CD302	4.06313e-63	-0.221043	-0.956405
IQGAP1	4.68653e-63	0.357806	0.509446
SNRPF	5.02345e-63	-0.151206	-0.20937
KCTD8	5.41364e-63	0.00379162	3.33408
NTAN1	5.81626e-63	-0.19603	-0.437125
BCAT2	6.06255e-63	0.216688	0.663774
METTL9	7.44123e-63	-0.1618	-0.257361
R3HDM1	7.72378e-63	-0.210531	-0.392313
AS3MT	8.54499e-63	0.161963	0.749322
MYO10	8.96947e-63	-0.23556	-0.429232
GNG3	1.02765e-62	0.242055	0.651968
HSPB8	1.12066e-62	-0.390047	-3.31834
GNAO1	1.17294e-62	-0.237798	-1.18689
MRPS16	1.33535e-62	0.179736	0.353468
ARL3	1.37102e-62	-0.173556	-0.304254
ABCD2	1.51055e-62	-0.267347	-2.01256
TTC5	1.8226e-62	-0.206854	-0.508445
PGP	2.25584e-62	0.189338	0.380883
GPD2	2.78819e-62	0.229786	0.694138
CFAP20	2.83628e-62	-0.174302	-0.284895
IL17RD	3.20815e-62	-0.30386	-1.23635
ZFP329	3.883e-62	-0.217916	-0.519852
MRPL12	3.94355e-62	0.15529	0.26959
CTNNB1	4.19819e-62	-0.156337	-0.212995
TPPP3	4.34302e-62	0.0200395	1.82058
SELENOP	4.70561e-62	0.0695428	0.925648
E030030I06RIK	5.44457e-62	0.0407171	1.36136
HACE1	5.64952e-62	-0.235298	-0.91446
GPRC5C	5.73117e-62	0.182672	0.726398
HOXD1	6.04322e-62	0.00475587	3.16159
AMDHD1	6.49526e-62	0.00793185	2.72574
SULT4A1	6.92531e-62	0.116619	0.886207
TRH	7.05791e-62	0.0768552	1.22634
CLCN3	7.6094e-62	-0.220391	-0.451932
FNDC3B	1.00704e-61	-0.244288	-1.18591
SARNP	1.07411e-61	-0.173093	-0.255655
STX17	1.22901e-61	-0.228034	-1.05835
CIDEA	1.84681e-61	0.00144328	4.41601
ADRB1	2.0311e-61	0.00413968	3.27641
SENP7	2.1082e-61	-0.225719	-0.724739
CTNND2	2.1753e-61	-0.252524	-1.79826
MRPL18	2.20436e-61	0.136394	0.232861
PBX1	2.72366e-61	-0.204258	-0.355458
RC3H2	3.13614e-61	-0.223572	-0.52117
ZFP266	3.63247e-61	-0.198699	-0.37253
ADGRA2	3.8095e-61	0.00665089	2.67913
PARP8	3.93396e-61	-0.250852	-1.85699
NDUFB2	4.77145e-61	0.213085	0.447832
PEG3	6.10265e-61	0.389449	0.611245
ELAVL1	6.93265e-61	-0.164236	-0.244073
HIST1H4D	7.46961e-61	0.266136	0.624639
SLC16A11	7.87371e-61	0.0145663	2.16827
HIST1H3F	9.56099e-61	0.0801742	1.12912
SMIM3	1.0616e-60	-0.235821	-0.998929
RPL14	1.14709e-60	0.0798326	0.116195
MAGI1	1.26422e-60	0.173259	0.756899
ZIC1	1.27106e-60	-0.586426	-3.25304
TLK1	1.36586e-60	-0.193097	-0.333196
ZHX1	1.38577e-60	-0.23866	-0.854144
CGNL1	1.42839e-60	0.0411759	0.0187973
PLA2G12A	1.44736e-60	0.250167	0.50029
FYTTD1	1.79796e-60	-0.191688	-0.342767
RASGRP3	2.96962e-60	0.0139345	2.23688
ZFP219	3.23337e-60	-0.205212	-0.441961
WBSCR22	3.43448e-60	0.205063	0.43037
MGST1	3.86518e-60	-0.225285	-0.691193
PPT1	4.1789e-60	-0.213559	-0.626954
GLS	4.43336e-60	-0.230368	-0.507097
CLASP1	4.68591e-60	-0.20985	-0.453533
PLATR10	6.60184e-60	0.0301703	1.46457
DUT	8.41522e-60	0.135032	0.214681
PHOX2A	9.39549e-60	0.100464	0.926715
ATP6V1F	1.10722e-59	0.160283	0.293049
SCLT1	1.19182e-59	-0.220903	-0.542112
SIX6	1.41025e-59	-1.48852	-6.44846
CHD1	1.4586e-59	-0.168853	-0.24204
HSPA8	1.92021e-59	0.134573	0.205359
FNDC3A	2.33133e-59	-0.201836	-0.464292
GM26700	2.47123e-59	-0.462554	-3.67877
AKT3	2.53233e-59	-0.221604	-1.02419
RPS17	3.74306e-59	0.0813149	0.12209
SON	5.40038e-59	0.157861	0.278575
X2510009E07RIK	6.38086e-59	-0.22687
CHORDC1	6.74872e-59	0.186264	0.380097
PTBP2	8.42878e-59	-0.199243	-0.385025
SELENOK	8.54579e-59	-0.168258	-0.243183
UCP2	9.05473e-59	0.21791	0.588538
NFAT5	9.1932e-59	-0.234788	-0.668759
EML5	9.64872e-59	-0.233727	-1.3099
HSBP1	1.06966e-58	-0.157659	-0.242136
X2610318N02RIK	1.63339e-58	-0.183582
SHB	1.65787e-58	0.0973392	0.728817
CNTNAP2	1.87298e-58	-0.21841	-0.914257
TWF2	2.12732e-58	0.191597	0.648229
FAM195A	2.26587e-58	0.169287	0.735215
ZFP811	2.2785e-58	-0.232706	-0.960816
AKR1E1	2.29255e-58	-0.211037	-0.624707
EFNA2	2.45341e-58	-0.222312	-0.613034
DTNBP1	2.58657e-58	0.22792	0.573844
POU3F4	2.87428e-58	-0.401685	-2.91868
HNRNPL	2.93505e-58	-0.177135	-0.27006
MXRA7	3.01209e-58	-0.213663	-0.613847
NABP2	3.05158e-58	0.196053	0.405795
FAM208B	3.06063e-58	-0.223135	-0.493849
TPM1	3.15502e-58	0.230547	0.416182
HIST1H3E	4.25337e-58	0.193516	0.656702
CAR10	4.56047e-58	-0.387634	-2.58864
X1190002N15RIK	4.60464e-58	0.138201
MARCH7	5.22466e-58	-0.195034	-0.378008
MAPK8IP1	5.7446e-58	-0.207678	-0.584397
LARS2	6.50188e-58	0.193337	0.755315
ZMYM2	6.63495e-58	-0.213013	-0.466592
CDV3	7.99509e-58	0.156797	0.250797
X3110082J24RIK	8.44087e-58	-0.385093
RGS2	8.56778e-58	-0.263712	-1.4077
DYNC2H1	9.46157e-58	-0.231678	-0.641995
SPARC	9.66654e-58	-0.215004	-0.388377
KDF1	1.06992e-57	0.0302168	1.45852
PLEKHO1	1.19736e-57	-0.21721	-0.606091
LPAR6	1.34152e-57	-0.217757	-0.572137
SWI5	1.71831e-57	-0.114117	-0.155552
PLEKHA6	1.71859e-57	0.03193	1.33831
HS3ST3B1	1.77897e-57	-0.276713	-1.7865
TROVE2	1.91596e-57	-0.228616	-0.601674
MAT2A	1.98496e-57	-0.161155	-0.224027
MPP2	2.11296e-57	-0.225077	-1.19917
PPP1R16B	2.14099e-57	-0.288346	-2.44118
AKAP13	2.17137e-57	-0.217771	-0.504651
SPIRE1	2.32184e-57	-0.192855	-0.503833
SMTNL2	2.33392e-57	-0.229897	-0.724315
NEGR1	2.35094e-57	-0.250877	-1.88884
FAM84B	2.59378e-57	-0.240679	-1.37095
TPT1	2.64386e-57	-0.0815294	-0.109118
RPL34	2.64817e-57	0.085869	0.122881
TACC2	2.69376e-57	-0.212316	-0.513443
PHC1	2.97093e-57	0.261182	0.626343
CNRIP1	3.24803e-57	-0.220919	-0.868894
IRX3	3.85774e-57	-0.0702564	-0.228605
NIPSNAP3B	4.52966e-57	-0.19298	-0.431855
SLC38A2	4.92938e-57	-0.19396	-0.32345
NDUFC1	5.28773e-57	0.151214	0.251497
GM42637	5.8319e-57	0.0763132	0.933021
FGF8	7.18393e-57	-0.0110512	-0.347436
ATIC	8.50405e-57	0.241626	0.427663
MYCL	8.50405e-57	-0.116234	-0.357469
IGFBPL1	9.62531e-57	-0.227284	-0.797457
ZFP318	9.69456e-57	-0.224226	-0.5185
PIK3IP1	1.05741e-56	-0.258299	-2.19649
SOD1	1.08182e-56	0.279151	0.502642
ORC6	1.09839e-56	-0.176165	-0.266466
CPE	1.16142e-56	-0.210548	-0.523991
DOK5	1.29428e-56	-0.242506	-1.77031
ZCCHC7	1.33762e-56	-0.211251	-0.416979
CYP51	1.91843e-56	-0.229741	-0.633764
SYT6	2.49181e-56	-0.317853	-2.89771
AR	2.92538e-56	0.0759623	0.911683
ANK3	3.43767e-56	0.193051	0.701563
DKK1	3.52623e-56	-0.0498181	-0.559022
BACH1	3.53543e-56	-0.217548	-0.661137
XPOT	3.77784e-56	-0.191097	-0.3996
PJA2	4.05634e-56	-0.215983	-0.588824
MECOM	4.42786e-56	-0.278749	-1.69982
CD63	4.52236e-56	-0.188745	-0.356723
RPS26	4.68181e-56	0.0779146	0.113666
ATAT1	5.32585e-56	-0.209302	-0.595031
SUPT3	5.32957e-56	-0.203867	-0.616746
LLGL1	5.95725e-56	-0.209005	-0.511259
SPATS2L	6.0297e-56	-0.234869	-1.4327
TRA2A	6.25368e-56	-0.167826	-0.256423
C030018K13RIK	7.51561e-56	-0.613395	-5.30186
KIF15	8.01651e-56	-0.185205	-0.288133
SDHA	8.64254e-56	0.214344	0.441467
BEX3	9.78599e-56	-0.173754	-0.262241
NME1	1.00923e-55	0.114812	0.183542
COX7B	1.13594e-55	0.125343	0.193047
TEC	1.29156e-55	0.0114339	2.21137
PNISR	1.34359e-55	-0.179535	-0.272816
CRABP2	1.37864e-55	0.3875	0.533498
PPIF	1.46864e-55	0.213234	0.608699
MBTD1	1.64016e-55	-0.196199	-0.355927
MRPL57	2.09115e-55	0.181384	0.36508
RPS9	2.29e-55	0.0936684	0.137047
NAA38	2.65963e-55	0.200559	0.401906
SESN3	2.71686e-55	-0.208489	-0.522419
BBX	2.78888e-55	-0.199495	-0.363698
PRR3	2.93032e-55	-0.205462	-0.642215
A830018L16RIK	3.34458e-55	0.0875501	0.646784
NOTCH3	4.05395e-55	-0.217426	-0.749546
REEP5	5.38202e-55	0.2338	0.557495
SYCP3	6.50757e-55	0.0227758	1.74373
RHPN1	6.57259e-55	-0.214181	-1.54373
SYNGR2	6.97792e-55	0.17528	0.678152
MIP	8.34579e-55	-0.268908	-2.26231
CELRR	1.13134e-54	-0.462185	-4.01941
DCXR	1.15193e-54	0.0834132	0.958025
UBR2	1.15846e-54	0.217807	0.621206
RBM24	1.24907e-54	-0.2396	-1.42443
MRGBP	1.312e-54	-0.206256	-0.570351
PKIA	1.49872e-54	-0.208637	-0.926177
FAH	1.5137e-54	0.0560931	1.16048
MRPL33	2.20136e-54	0.16908	0.339
CELF4	2.30963e-54	0.135359	0.786585
SLC25A13	2.72667e-54	0.248442	0.509971
MRPL40	2.78105e-54	0.216162	0.429265
PTPN6	4.32892e-54	0.0852341	0.932792
LSM8	4.47671e-54	-0.151161	-0.212898
KLF7	4.53964e-54	-0.223456	-1.02407
RHOB	4.90157e-54	-0.214429	-0.878658
EFCAB6	5.05221e-54	0.0276087	1.42184
FAM96A	5.09651e-54	-0.171262	-0.301615
PCOLCE	7.0238e-54	0.0287182	1.53641
TRMT10C	7.63495e-54	-0.187455	-0.384764
FAM131C	7.66411e-54	0.00435889	3.15905
NET1	8.00564e-54	-0.221629	-0.463517
PCSK2	8.15088e-54	-0.267418	-1.79578
MT-ATP8	8.56999e-54	0.239558	0.420111
BIN1	9.29774e-54	-0.194519	-0.455891
PSTK	1.0044e-53	-0.180939	-0.391682
GPC3	1.0047e-53	-0.234417	-0.446181
HBB-Y	1.21932e-53		-25.237
FGF18	1.30455e-53	-0.503333	-3.62173
CTXN1	1.35387e-53	-0.190873	-0.452143
TRP53BP1	1.66317e-53	-0.197861	-0.409055
ARID3B	1.72312e-53	0.278908	0.577327
G3BP1	1.88748e-53	-0.137678	-0.172909
GSTK1	2.22448e-53	0.0497285	1.16917
RHEB	2.41598e-53	-0.16042	-0.227062
PACSIN3	2.75637e-53	0.0929912	0.866645
EIF3K	3.98257e-53	0.126455	0.197548
GATM	4.19337e-53	-0.204415	-1.03651
EFCAB1	4.98932e-53	-0.224519	-1.77494
LAMC1	5.08696e-53	0.158632	0.733661
MCM5	5.48194e-53	0.173878	0.346604
YWHAQ	5.69576e-53	-0.119724	-0.163391
CCNI	6.58598e-53	-0.170446	-0.267774
FOSB	6.84348e-53	0.0144135	2.2353
RAPGEF5	7.735e-53	0.0710812	0.994599
STAP2	8.72142e-53	0.0754645	0.936478
RPLP0	9.29453e-53	0.0725453	0.104747
MTHFD1	9.76557e-53	0.242716	0.512227
PSMD4	9.76557e-53	0.141681	0.26745
TANC2	9.85655e-53	-0.210978	-1.31448
SMAP1	1.06106e-52	-0.160145	-0.263211
SATB1	1.09074e-52	-0.20945	-0.537748
ETNK1	1.40692e-52	-0.199623	-0.490013
ELAVL2	1.52694e-52	-0.213969	-0.544078
METTL1	1.72785e-52	0.179478	0.379977
DAPK2	2.40921e-52	-0.225665	-2.02722
GADD45G	2.4739e-52	0.0292172	1.59227
LRP3	2.76376e-52	-0.204056	-0.729981
ABCG5	2.94177e-52	-0.438671	-3.78054
OLFML3	3.06567e-52	-0.245591	-1.73165
RPL38	3.26615e-52	0.124087	0.177418
RPS15	3.53068e-52	0.0800075	0.114589
EIF3C	3.54768e-52	0.117237	0.189951
TIMM13	3.5729e-52	0.113865	0.190727
FGF3	4.13057e-52	0.0522563	0.201931
MLF2	4.20918e-52	-0.131325	-0.188897
BLNK	4.53859e-52	0.0454347	1.26164
ARL5B	4.64877e-52	-0.211362	-0.581406
MICU2	5.32447e-52	-0.198406	-0.534034
GSTT3	5.47215e-52	0.0244115	1.5877
X1810041L15RIK	5.78684e-52	-0.300397
XRCC6	7.35894e-52	0.212067	0.550207
ZMYM4	9.29939e-52	-0.186686	-0.336772
PPP1R9B	1.00272e-51	-0.204247	-1.07251
NHP2	1.03335e-51	0.136253	0.227245
NDFIP2	1.14103e-51	-0.194047	-0.483926
RSU1	1.31976e-51	-0.184671	-0.441766
TSEN34	1.38378e-51	-0.162002	-0.263351
PRPSAP1	1.47372e-51	0.225181	0.460705
BARHL2	1.51626e-51		-25.9683
ZFP362	1.52155e-51	-0.20296	-0.859914
LAD1	1.60441e-51	0.0101761	2.19979
A730017C20RIK	1.64378e-51	-0.226955	-1.38962
RCBTB1	1.97943e-51	-0.191751	-0.436539
NR2E1	2.01733e-51		-25.6632
WDR76	2.08732e-51	-0.193346	-0.392723
PLTP	2.11563e-51	-0.218492	-1.48202
CHMP5	2.2e-51	-0.164429	-0.296043
SDC3	2.75706e-51	-0.238182	-2.054
GSTM7	2.80819e-51	0.0351477	1.30407
AURKAIP1	3.1695e-51	0.165862	0.336366
ENSA	3.28067e-51	-0.181842	-0.388438
PITHD1	3.33621e-51	0.216081	0.533544
ME3	3.50329e-51	-0.314894	-2.65025
ELAVL4	3.60454e-51	-0.267834	-2.26411
FAM214B	3.63856e-51	-0.198698	-1.16433
MDFI	4.02712e-51	-0.196796	-1.11011
LDLRAD3	4.057e-51	-0.193316	-0.58119
CCNT2	4.22776e-51	-0.184944	-0.352208
ZFP207	4.23015e-51	-0.159323	-0.221802
X2210013O21RIK	5.7951e-51	-0.179758
E2F6	6.11986e-51	-0.198697	-0.504639
ZMIZ1	6.2149e-51	-0.203561	-0.42314
NUTF2	6.82135e-51	-0.175901	-0.482994
UBXN7	7.59062e-51	-0.206047	-0.57334
SOCS6	8.80486e-51	-0.20036	-0.47119
SIK1	1.18437e-50	-0.206553	-1.54733
PRUNE2	1.20095e-50	0.0349737	1.31864
BAMBI	1.33531e-50	-0.20596	-1.17471
X4930461G14RIK	1.43298e-50	0.00224256
DYNLT1C	1.43942e-50	-0.186977	-0.719024
SIKE1	1.46998e-50	-0.185011	-0.400998
LSM12	1.55975e-50	0.135754	0.252115
UNG	1.73553e-50	0.36806	0.527642
KLHL2	1.86632e-50	-0.190574	-0.669512
YAE1D1	2.10109e-50	-0.161243	-0.2362
PSME2	2.33232e-50	-0.179238	-0.373792
PLVAP	2.45095e-50	0.0219434	1.63943
ZFP710	2.4928e-50	-0.218298	-0.632047
DZIP1	2.56626e-50	-0.200285	-0.988634
IGFBP2	2.59724e-50	0.613177	0.467241
PCP4L1	2.88154e-50	-0.446634	-3.60619
PPP1R9A	2.90193e-50	-0.222519	-0.546565
CAMK2D	3.4411e-50	-0.210206	-1.13782
BEX2	3.76734e-50	-0.160542	-0.229653
MAX	3.97093e-50	-0.186162	-0.414317
PIK3R3	4.12129e-50	-0.204583	-1.236
CROCC	4.21072e-50	-0.197766	-0.725715
DYNC2LI1	4.22852e-50	-0.190195	-0.591376
UBE2B	4.6126e-50	-0.153169	-0.240231
RAB12	4.66903e-50	-0.198519	-0.532162
COX5B	4.66966e-50	0.126395	0.209427
ZFYVE9	4.80939e-50	-0.206805	-0.573681
TMEM258	4.94658e-50	0.134012	0.211484
ENPP2	5.11405e-50	-0.557122	-3.61674
PYGO1	5.79386e-50	-0.209854	-1.49817
GM8186	6.06354e-50	0.174717	0.319248
PPP2R3A	6.42719e-50	-0.203502	-0.754597
TRIM35	6.54414e-50	-0.197695	-0.471124
NRIP3	6.89781e-50	-0.297581	-2.54708
CTSC	7.3971e-50	0.0361161	1.25198
PATJ	8.0079e-50	0.0535219	1.10498
VGLL3	8.19978e-50	-0.750244	-3.13661
GRCC10	1.02488e-49	-0.190281	-0.707145
SLC25A36	1.02966e-49	-0.19821	-0.533422
CFL2	1.08075e-49	0.226679	0.434829
PPP1CB	1.08384e-49	-0.182998	-0.335899
UQCC3	1.23026e-49	0.187468	0.387647
BNIP3	1.41888e-49	-0.199157	-0.357952
KDM7A	1.60562e-49	-0.218102	-0.584986
SPG20	1.6871e-49	-0.201841	-0.542981
GM26767	1.97257e-49	0.19872	0.804755
TUSC3	2.03642e-49	-0.180771	-0.389161
PIAS2	2.04694e-49	-0.19071	-0.50139
MAOB	2.1949e-49	-0.210626	-1.48438
H2-Q4	2.19951e-49	0.0672799	1.00517
SCAF11	2.38853e-49	-0.163669	-0.238898
DPM3	2.46307e-49	0.215049	0.411658
ZFP280C	2.55436e-49	-0.195556	-0.45907
RNF152	2.59157e-49	-0.256615	-2.02399
ATP8A1	2.89624e-49	-0.195921	-1.27574
RBM15	3.12774e-49	-0.204737	-0.512346
ZFP871	3.27727e-49	-0.190943	-0.462999
WNK3	3.40128e-49	-0.193842	-0.508663
ZFP945	3.59318e-49	-0.201531	-0.596484
CYYR1	3.60513e-49	0.0129878	2.05802
ESRP1	3.64938e-49	0.0420814	1.03413
TGFBR1	3.7473e-49	-0.197278	-0.513259
NPEPL1	4.12912e-49	-0.186178	-0.572633
TFG	4.23785e-49	-0.160659	-0.260263
AIFM2	4.25657e-49	0.00544167	2.68716
NEDD1	4.54768e-49	-0.191483	-0.539585
CACNA1G	4.99929e-49	-0.209321	-1.39041
CLIP3	5.03091e-49	-0.192916	-0.506431
SGTB	5.20001e-49	-0.205293	-1.26684
NID2	5.24512e-49	0.0741282	0.940237
CNNM2	5.43141e-49	0.0672467	0.985842
AZIN1	5.97015e-49	-0.174981	-0.304607
GSTM1	6.25342e-49	-0.19682	-0.662263
ROBO2	6.47709e-49	-0.281432	-1.89573
TMEM30A	7.02079e-49	-0.176181	-0.425917
ASTN1	7.38318e-49	-0.196686	-1.42051
ZNRD1	7.50853e-49	0.149855	0.322944
ABCB8	7.78516e-49	0.114338	0.78734
X2810428I15RIK	8.44406e-49	0.151215
MPST	9.03406e-49	-0.188138	-0.448286
RPL36A	9.13489e-49	0.0783971	0.112484
PMF1	9.50494e-49	0.17468	0.370781
UBE2QL1	1.12544e-48	-0.2472	-2.38511
RBBP4	1.27841e-48	-0.130233	-0.18513
VAMP4	1.42464e-48	-0.17915	-0.49116
HDAC2	1.5065e-48	-0.152891	-0.225967
SYNE4	1.59496e-48	0.0615069	0.971009
PUM2	1.65499e-48	-0.177565	-0.29335
LGI1	1.66445e-48	-0.549063	-4.54597
CEP170	1.79993e-48	-0.202015	-0.538539
RDX	1.8727e-48	0.148	0.259745
CSNK1G3	2.25796e-48	-0.177787	-0.349703
SFPQ	2.26631e-48	-0.141193	-0.190039
LAMTOR4	2.29655e-48	0.182545	0.366468
GCHFR	2.29807e-48	-0.189281	-0.9882
CDC42SE2	2.377e-48	-0.181722	-0.387789
ASPH	2.48301e-48	-0.190371	-0.417601
AKR1A1	2.60008e-48	-0.142476	-0.220065
CLSPN	2.61491e-48	0.228537	0.447253
PHF12	2.64627e-48	-0.196069	-0.48626
PWWP2A	2.67742e-48	-0.178653	-0.348379
MRPS34	2.80837e-48	0.169316	0.356461
MARK3	2.85618e-48	-0.176447	-0.333045
CSTF3	2.9055e-48	-0.175363	-0.341929
USP22	3.18512e-48	-0.179693	-0.349062
ACADM	3.48263e-48	0.209532	0.531197
RIMKLB	3.53233e-48	-0.196369	-0.629453
KLHL14	3.84427e-48	-0.261288	-2.24733
TRIM37	4.10843e-48	-0.170194	-0.296168
NR0B1	4.14313e-48	0.00659639	2.5828
RBAKDN	4.25592e-48	0.014782	1.8513
CUL3	5.15201e-48	-0.164333	-0.241389
SORD	5.18476e-48	0.0510742	1.10244
CD1D1	5.3825e-48	-0.203581	-1.85361
CCDC34	6.27976e-48	0.150161	0.279017
STRA8	6.3657e-48	0.00116043	4.39974
ACVR2B	7.39402e-48	-0.151183	-0.220135
ZBED3	7.86543e-48	-0.190724	-0.75049
NISCH	8.10106e-48	-0.155198	-0.232684
RBMX	8.38985e-48	-0.168497	-0.288811
RPL3	9.7598e-48	-0.0742551	-0.102822
CKAP5	9.93745e-48	-0.18497	-0.285211
NF1	1.03125e-47	-0.193947	-0.607856
SEMA3A	1.16551e-47	-0.26435	-2.0719
EEF2	1.39947e-47	-0.115386	-0.153795
SHTN1	1.57362e-47	-0.268521	-2.33515
X6720427I07RIK	1.68523e-47	-0.19664
HPN	1.74644e-47	0.0265105	1.47793
FAM64A	1.75966e-47	-0.184933	-0.315101
PDPN	1.95701e-47	0.0856189	0.8193
ROCK1	2.25001e-47	0.187455	0.379301
NCAM1	2.28684e-47	0.180343	0.657507
WASF1	2.54096e-47	-0.189643	-0.452153
NT5E	2.79667e-47	0.00329107	3.35882
HBA-X	2.97593e-47		-25.066
CDKN2AIP	3.28791e-47	-0.190714	-0.51862
APOA1	3.59631e-47	0.0478446	1.33707
STARD8	4.15915e-47	0.0246723	1.49233
COA7	4.27451e-47	0.207975	0.488413
LRP10	4.70402e-47	0.0908714	0.895507
EPB41	5.10186e-47	-0.188087	-0.351053
ITM2A	5.54982e-47	-0.185828	-0.511324
PDGFRB	5.56205e-47	0.026911	1.39533
LRRC8B	6.29252e-47	-0.19258	-1.03572
SQLE	6.37461e-47	-0.188176	-0.42196
RBM4B	6.64387e-47	-0.169751	-0.368122
ELOVL2	6.73482e-47	-0.193143	-0.876357
BRWD1	8.48521e-47	-0.180757	-0.370147
CFAP97	8.53772e-47	-0.189294	-0.520782
RABGAP1	9.96581e-47	-0.186309	-0.431127
COPS6	1.04095e-46	0.172345	0.343051
MBD3	1.19129e-46	0.141742	0.281622
IMPDH1	1.26381e-46	0.184628	0.597438
MYH9	1.26905e-46	0.256838	0.519479
HMBOX1	1.34989e-46	-0.189439	-0.716172
STARD10	1.40691e-46	0.121316	0.688021
HIVEP3	1.45461e-46	0.00382478	2.89743
ASH1L	1.4938e-46	-0.19549	-0.423568
GM10837	1.50459e-46	0.165255	0.684945
NME4	1.52239e-46	0.198706	0.419769
SLC5A3	1.57367e-46	-0.201324	-0.84185
CEP44	1.76664e-46	-0.185267	-0.478921
IDI1	1.81372e-46	-0.193732	-0.372024
JAKMIP1	1.90051e-46	0.032899	1.0086
DDIT4	2.17786e-46	0.278158	0.54109
LIN28A	2.23691e-46	0.172859	0.323836
TNNI1	2.60172e-46	0.0115916	1.98036
CAR14	2.80324e-46	0.266578	0.526876
SEC62	3.55812e-46	0.157962	0.306692
MGARP	3.81502e-46	-0.194849	-0.697921
FAM98C	4.08664e-46	0.16467	0.624691
DTX3	4.30836e-46	-0.184188	-0.456469
RNF128	4.33551e-46	0.0316464	1.32581
ACP6	4.48743e-46	0.15459	0.663164
ACADS	4.5002e-46	0.192453	0.571066
BMP5	4.97771e-46	-0.228419	-1.93149
TSNAX	5.46781e-46	-0.171539	-0.339814
NAE1	6.0993e-46	-0.14564	-0.216301
HIST2H2AC	6.2889e-46	0.124565	0.842255
STK26	6.33198e-46	0.0730194	0.751012
CLEC2L	6.58702e-46	-0.239824	-1.86975
NAT14	6.79229e-46	-0.182546	-1.23891
METAP2	6.98704e-46	0.117133	0.201438
GM9847	7.57896e-46	-0.19477	-1.11684
HSD17B11	7.76191e-46	0.0532885	1.01704
FAM60A	7.81705e-46	-0.14289	-0.198538
GM3550	8.00185e-46	-0.167625	-0.417962
DTX4	8.64717e-46	-0.187311	-0.716906
TUBB5	8.75076e-46	-0.0884366	-0.123741
RPA1	9.23716e-46	0.205678	0.471103
PEX5L	9.81536e-46	-0.201764	-1.47911
GOLM1	1.05704e-45	-0.165922	-0.265477
STX6	1.14468e-45	-0.179103	-0.419093
DLK1	1.17249e-45	-0.229644	-1.19354
NDUFV1	1.22491e-45	0.196257	0.398267
ZFP292	1.24852e-45	-0.182046	-0.296534
SIAH1A	1.31568e-45	-0.179666	-0.452838
NEBL	1.32313e-45	-0.227142	-1.86993
SLAIN1	1.36785e-45	-0.184526	-0.869678
IFIH1	1.37505e-45	0.00144791	3.95754
ZFAND3	1.42501e-45	-0.176536	-0.413582
D030056L22RIK	1.56335e-45	-0.1683	-0.327147
PBDC1	1.57646e-45	0.146275	0.293468
DUSP18	1.64313e-45	-0.189001	-0.972037
CXX1C	1.65928e-45	0.00775027	2.41043
TM9SF3	1.83623e-45	-0.172147	-0.267874
MAN2A1	1.84946e-45	-0.202062	-0.716315
GSPT1	2.08586e-45	0.136828	0.266156
TIGD2	2.29453e-45	-0.184059	-0.580888
FAT1	2.5875e-45	-0.182388	-0.441364
CDCA2	2.58753e-45	-0.2132	-0.431885
RABGGTB	2.93831e-45	-0.149265	-0.233237
GCC2	2.96116e-45	0.228744	0.534287
TXN1	3.37379e-45	-0.101203	-0.137866
MED25	3.38691e-45	-0.162868	-0.287415
LONRF1	3.49815e-45	-0.189238	-0.932778
ABHD8	3.56047e-45	0.167765	0.621151
SMARCC2	3.77584e-45	-0.186872	-0.543926
NRXN2	3.88013e-45	-0.182601	-0.450184
IQCB1	4.31875e-45	-0.170637	-0.433547
NENF	4.31875e-45	-0.180012	-0.425996
NAV2	4.39345e-45	-0.132025	-0.356923
CRABP1	4.65709e-45	-0.227581	-0.489323
BTRC	4.6596e-45	0.142334	0.661757
GALNT16	4.72843e-45	-0.186762	-1.18999
CAT	4.88482e-45	-0.175508	-0.414154
TRABD2B	5.29025e-45	-0.221648	-1.63606
X2700038G22RIK	5.31054e-45	-0.179945
TUBB4A	5.84197e-45	-0.169751	-0.547566
FAM168A	6.09019e-45	-0.192254	-0.549049
X9430076C15RIK	7.17021e-45	-0.445542
LAS1L	8.46486e-45	0.197233	0.414855
GM30340	8.62768e-45	-0.586161	-6.33795
MPHOSPH8	8.96199e-45	0.159718	0.309304
COQ4	9.97799e-45	0.194098	0.497544
ADGRB2	1.00796e-44	0.057876	1.02213
ATP5G3	1.03334e-44	0.116927	0.208814
GNAZ	1.06495e-44	-0.192131	-1.39468
GATAD2B	1.06968e-44	-0.188575	-0.414195
PLA2G7	1.15233e-44	0.144038	0.566388
ZFP24	1.20446e-44	-0.163314	-0.322957
EIF4H	1.21544e-44	0.153728	0.31796
CREBZF	1.22665e-44	-0.171592	-0.345112
BMI1	1.30713e-44	-0.184138	-0.659564
RPS12-PS3	1.36811e-44	-0.0949484	-0.134803
PAM16	1.51884e-44	0.175864	0.361382
NDUFB10	1.69543e-44	0.149293	0.303241
AGAP1	1.86846e-44	-0.184741	-0.412497
KLHL9	1.87916e-44	-0.169878	-0.338186
FAM172A	2.0964e-44	-0.182244	-0.705365
X2310009B15RIK	2.9435e-44	-0.166453
RASA1	3.04391e-44	-0.1635	-0.307463
RAB11FIP2	3.20541e-44	-0.192676	-0.664509
FZD1	3.33613e-44	-0.191112	-1.66496
ADH5	3.42687e-44	0.12918	0.246577
PJA1	3.45967e-44	0.225607	0.451286
CENPV	4.1966e-44	-0.180167	-0.514252
FAIM	4.33619e-44	-0.167256	-0.375129
PFKFB3	4.66827e-44	-0.190031	-0.790896
TNKS	4.68171e-44	-0.180096	-0.445804
POLR2D	4.71985e-44	-0.13999	-0.220948
BASP1	4.88975e-44	0.412063	0.401179
DENND1A	5.11611e-44	-0.185629	-0.795969
X2610037D02RIK	5.27113e-44	-0.191439
LUC7L2	5.32868e-44	-0.14499	-0.218261
RFX7	5.66912e-44	-0.184286	-0.414372
COQ2	6.21416e-44	-0.16451	-0.426361
CBX3	6.23974e-44	-0.14388	-0.213729
MPP6	6.90446e-44	-0.158864	-0.233225
RBM11	6.9772e-44	-0.339931	-3.36058
RPS10	7.40238e-44	-0.0569817	-0.0843322
TAOK1	7.73287e-44	-0.181888	-0.391954
IFT52	8.05541e-44	-0.178983	-0.510032
SNRPA1	8.79519e-44	0.122212	0.230669
TXNL4A	9.67826e-44	0.11831	0.201094
MRPS23	1.0193e-43	0.186009	0.39485
IGF2BP2	1.03651e-43	-0.164065	-0.249639
SH3BGRL3	1.04794e-43	-0.138173	-0.237472
MARCH9	1.25423e-43	-0.184286	-0.476454
PRKAR2B	1.25803e-43	-0.165804	-0.419669
MACROD2	1.30283e-43	-0.160661	-0.453749
SCAI	1.30401e-43	-0.182836	-0.634362
BUB3	1.3081e-43	-0.166546	-0.23317
SRSF5	1.39155e-43	-0.159861	-0.212084
TTC9C	1.48239e-43	-0.174318	-0.385191
FGFR4	1.56868e-43	0.00537434	2.5214
CUX1	1.62089e-43	-0.177154	-0.388107
LMX1A	1.6251e-43	-0.476579	-4.28186
GM12166	1.68368e-43	-0.167414	-0.673562
NSG1	1.80878e-43	-0.183256	-0.671652
PODXL	1.84209e-43	-0.20694	-0.512128
LPIN2	2.04694e-43	-0.185921	-0.650498
SNAPC5	2.14394e-43	0.191012	0.406342
ANP32E	2.2206e-43	-0.140951	-0.195303
MECP2	2.55419e-43	-0.179531	-0.468686
PNRC1	3.03424e-43	-0.177092	-0.302318
PFDN4	3.28811e-43	-0.14732	-0.206951
MMP16	3.34069e-43	-0.182059	-1.02584
MINOS1	3.42357e-43	0.126331	0.238067
IVD	3.87013e-43	0.163899	0.60535
MZT1	4.07314e-43	-0.152518	-0.347295
RAB28	4.60861e-43	-0.14759	-0.318627
RPS24	4.80683e-43	-0.0552829	-0.0820227
VPS72	4.83824e-43	-0.151493	-0.260037
GCLM	4.84366e-43	0.186126	0.420681
KITL	5.02208e-43	0.0508963	0.828089
GNB4	6.20488e-43	-0.181477	-0.677648
CASP8	6.41414e-43	0.085071	0.776681
EIF2B4	6.72821e-43	0.195857	0.499412
WDR18	7.51789e-43	0.15789	0.332377
SLC25A5	7.64126e-43	0.146662	0.270452
PATZ1	7.67626e-43	-0.165199	-0.314406
RBMS1	8.4797e-43	0.23828	0.494036
MGA	8.92039e-43	-0.187903	-0.342639
ACTC1	9.68246e-43	0.0162444	1.72554
LRRC8C	1.01311e-42	-0.181927	-0.665756
IGFBP3	1.03394e-42	-0.20243	-1.27759
GABARAPL2	1.05679e-42	-0.14325	-0.226913
HIST1H2AN	1.06699e-42	0.114943	0.714825
X1110008P14RIK	1.0849e-42	0.229111
TCP11L1	1.0849e-42	-0.16954	-0.548495
VPS37B	1.27168e-42	-0.177793	-0.585639
SIRPA	1.36985e-42	-0.185243	-0.955311
FUS	1.60077e-42	-0.143494	-0.203163
DIAPH1	1.60432e-42	0.20545	0.560395
PFKL	1.66452e-42	-0.130898	-0.174067
DDX24	1.69178e-42	0.130654	0.250332
MT3	1.75217e-42	-0.183218	-1.37319
RPL30	1.78176e-42	0.0654142	0.0905751
ARPC1A	1.90322e-42	-0.134475	-0.211528
CDC14A	1.99223e-42	-0.187286	-0.71369
AIFM1	2.01018e-42	0.208132	0.431572
APP	2.09164e-42	-0.162833	-0.423342
UBN2	2.09164e-42	-0.166722	-0.281235
MXI1	2.14051e-42	-0.175401	-0.60463
CCDC88B	2.23191e-42	0.00172624	3.71498
ARHGAP29	2.2487e-42	-0.17055	-0.495248
BOC	2.26625e-42	-0.198597	-1.24202
D930015E06RIK	2.50717e-42	-0.179799	-0.527128
MED10	3.31776e-42	-0.138954	-0.209985
TMEM54	3.37346e-42	0.0171513	1.70314
ICK	3.4014e-42	-0.167079	-0.464199
TCEAL5	3.4355e-42	0.106661	0.723085
SNHG20	3.5132e-42	-0.170492	-0.354184
PEX2	3.56039e-42	-0.165927	-0.383906
APC2	3.67214e-42	-0.181269	-1.70371
HOXB6	3.76879e-42	0.000875826	5.09353
PCNP	4.21768e-42	-0.145756	-0.197812
GRN	4.71043e-42	0.126642	0.691294
USP6NL	5.16487e-42	-0.183813	-0.646571
WNT5A	5.95065e-42	0.107025	0.751475
GTF2E2	6.47844e-42	-0.141163	-0.221253
PAPPA	6.70748e-42	-0.204792	-1.54189
CLIP4	7.59555e-42	-0.177397	-1.39245
NDUFA13	7.92385e-42	0.12365	0.217681
SEMA3F	8.27103e-42	-0.18133	-1.43354
SNX1	9.68189e-42	-0.170025	-0.419767
WTIP	1.00404e-41	-0.166349	-0.334219
OST4	1.04095e-41	-0.138155	-0.200494
ZSWIM5	1.04599e-41	-0.175132	-1.0344
ANKRD13B	1.09826e-41	-0.172216	-0.818013
ATP5J	1.12916e-41	0.0921559	0.145661
DLG4	1.12916e-41	-0.161673	-0.872284
TCEAL8	1.19595e-41	-0.145863	-0.201116
KHK	1.23194e-41	0.0943646	0.744982
KCNB1	1.25842e-41	-0.18151	-1.56798
KCTD15	1.34976e-41	-0.169174	-0.656305
CAMK2N1	1.37495e-41	0.0551694	0.808275
D8ERTD738E	1.38746e-41	0.114206	0.183658
SOS2	1.41309e-41	-0.167902	-0.876439
PAIP2	1.452e-41	-0.114451	-0.15618
NQO2	1.48008e-41	0.0934056	0.760401
ZDBF2	1.57193e-41	0.228797	0.534357
SEPT4	1.5974e-41	-0.176909	-1.45698
RNF145	1.65557e-41	-0.18269	-0.415363
BMYC	1.69649e-41	-0.156014	-0.276907
WDR6	1.9346e-41	-0.12966	-0.265987
PPP4C	2.00364e-41	-0.150066	-0.231339
BPTF	2.06082e-41	-0.153895	-0.224614
TMEM57	2.12766e-41	-0.174943	-0.38503
NEXN	2.16869e-41	-0.198579	-1.16446
KCNK6	2.31717e-41	0.00424998	2.77893
PRRC2B	2.38923e-41	-0.166328	-0.318973
ZFP760	2.40067e-41	-0.186428	-0.608607
D8ERTD82E	2.47478e-41	-0.172593	-0.633717
KLHDC2	2.65151e-41	-0.13194	-0.192634
FAM117B	2.6922e-41	-0.174843	-0.580113
SLC3A2	2.92872e-41	0.21375	0.461111
GLUD1	2.93188e-41	-0.167764	-0.355355
SMIM13	2.96193e-41	0.136874	0.655694
MINPP1	3.09004e-41	-0.162587	-0.324526
BCL2	3.10159e-41	-0.189124	-1.05108
HYPK	3.15656e-41	-0.142122	-0.246507
CCDC85B	3.35122e-41	0.118479	0.686872
CALM1	3.4211e-41	0.101044	0.158033
ZFP62	3.53598e-41	-0.18375	-0.537772
GNAI3	3.72714e-41	-0.148821	-0.234639
MED31	3.7776e-41	-0.154311	-0.293963
SIN3A	3.84672e-41	-0.16958	-0.325378
SBF2	3.89597e-41	-0.1798	-0.604331
OGDH	4.1156e-41	0.198916	0.500003
SMOC1	4.32819e-41	-0.189442	-1.17075
AP1S1	4.5817e-41	-0.146594	-0.274578
DCLK2	4.98859e-41	-0.172151	-1.36599
SMARCD2	5.26261e-41	0.12266	0.665273
PAPD5	5.58781e-41	-0.173842	-0.510209
RSL24D1	5.71775e-41	-0.148853	-0.221826
LEMD3	5.95334e-41	0.0441034	1.04929
SGOL2A	6.28747e-41	-0.20271	-0.395199
TIPARP	6.31537e-41	-0.166237	-0.500078
SUSD6	6.64989e-41	0.0940877	0.818219
SF3B6	6.80976e-41	-0.115278	-0.161563
FTSJ3	7.09209e-41	0.168397	0.355598
ENO2	7.67299e-41	-0.19005	-1.97019
HNRNPA2B1	8.19003e-41	-0.127734	-0.177703
ASAP3	8.1906e-41	0.00405137	2.70141
AEBP2	8.82947e-41	-0.175313	-0.414824
CXADR	9.79664e-41	-0.172277	-0.344858
PBX4	1.2332e-40	-0.164782	-0.929282
SLC16A10	1.26722e-40	0.0236238	1.39405
PUM1	1.27763e-40	-0.149856	-0.219935
KTN1	1.28456e-40	-0.142213	-0.190563
DZIP3	1.32799e-40	-0.179067	-0.42657
MIDN	1.42775e-40	-0.170139	-0.332668
GM26669	1.46787e-40	-0.18227	-1.05631
EPB41L3	1.48487e-40	0.109616	0.723823
RPL10-PS3	1.50241e-40	-0.139662	-0.1753
SRGAP1	1.65737e-40	-0.165313	-0.987016
DARS	1.80467e-40	-0.150789	-0.253769
TMEM263	1.98683e-40	-0.167637	-0.548444
DLX3	2.1208e-40	0.00557814	2.67819
FCHSD2	2.30525e-40	-0.170942	-0.558952
SERINC5	2.4144e-40	0.0297637	1.32903
CBX8	2.51569e-40	-0.161308	-1.32311
LRIG3	2.62807e-40	-0.186878	-0.61623
INPP5F	2.72715e-40	-0.17977	-0.556486
DHX9	2.87468e-40	-0.163547	-0.240331
THSD7A	3.05766e-40	-0.192155	-1.49642
DDIT4L	3.09166e-40	0.081224	0.809282
PHF14	3.57842e-40	-0.140444	-0.203622
RIC8B	3.57842e-40	-0.170027	-0.633494
GOT2	3.83599e-40	0.14203	0.307495
EIF1B	3.83599e-40	-0.12803	-0.179141
ATXN7L3B	3.98446e-40	-0.120034	-0.169213
ATP11C	4.10753e-40	-0.172356	-0.626724
ZFP428	4.18353e-40	0.166962	0.352344
TMED2	4.64895e-40	-0.144583	-0.203134
LGALSL	4.75803e-40	0.08653	0.794495
SLC38A5	4.76935e-40	0.0117526	1.97723
CENPQ	5.20327e-40	-0.159085	-0.346568
ARL6IP6	5.61626e-40	-0.16442	-0.291775
NEK6	6.09657e-40	-0.169079	-0.644664
RAB19	6.50085e-40	0.00491506	2.50721
CIB1	6.66006e-40	0.202676	0.461968
ATXN2L	6.70229e-40	-0.15996	-0.279798
RAP1GDS1	7.59009e-40	-0.155205	-0.481941
NLK	7.59009e-40	-0.172744	-0.411289
ZFP629	7.61835e-40	-0.171156	-0.672814
CBLB	7.72007e-40	-0.167072	-0.555701
FGD4	7.96213e-40	-0.174705	-0.949079
PRDX5	7.99404e-40	0.137064	0.297173
UFC1	7.99927e-40	-0.137498	-0.223605
AK3	8.22772e-40	0.100664	0.723335
ONECUT2	8.67049e-40	-0.212407	-2.07452
DAD1	9.01817e-40	0.119868	0.224747
CDK4	9.51638e-40	-0.0873478	-0.121536
ATP2C1	9.57872e-40	-0.1681	-0.4842
SEPT10	9.71451e-40	-0.172252	-0.537019
COQ3	9.89011e-40	0.0886053	0.760197
CDPF1	9.96875e-40	0.134144	0.621414
ZFP260	1.02098e-39	-0.173819	-0.360906
LENG8	1.03136e-39	-0.165818	-0.45912
KRT18	1.03355e-39	0.164173	0.347685
NUP62CL	1.04516e-39	-0.162048	-0.991969
DPP4	1.22461e-39	0.00613309	2.41181
PLXNA2	1.22469e-39	-0.228906	-0.792853
DHFR	1.26663e-39	0.159716	0.327489
TIAM1	1.40275e-39	-0.177882	-0.622549
G2E3	1.4028e-39	-0.185104	-0.361291
HMGA1-RS1	1.49624e-39	0.217224	0.456054
DBX1	1.54601e-39	-0.791421	-5.842
FUBP3	1.8065e-39	-0.170116	-0.364151
BCAP29	1.85027e-39	-0.166423	-0.745815
PLAC8	1.87229e-39	0.05857	0.856313
PEG10	2.00413e-39	-0.208543	-0.829224
SYTL1	2.14929e-39	0.00414219	2.7423
SRP19	2.19432e-39	0.122981	0.220182
PTPRZ1	2.42449e-39	0.0374908	0.0541393
SDF2L1	2.48204e-39	-0.161145	-0.26857
X2010107E04RIK	3.01437e-39	0.114396
RNF111	3.24952e-39	-0.157833	-0.329914
IKBKB	3.33134e-39	-0.15363	-0.446937
MTA3	3.9961e-39	0.153672	0.574129
PPIB	4.26905e-39	0.114574	0.201963
MRPL20	4.33909e-39	0.117172	0.213725
KANSL2	4.68924e-39	-0.158798	-0.322398
CCDC88A	5.0676e-39	0.249221	0.486075
DBN1	5.27841e-39	-0.179144	-0.279165
UBE2G1	5.3016e-39	-0.156304	-0.298515
RFWD2	5.37586e-39	-0.141998	-0.237629
NR4A3	5.89711e-39	-0.29661	-3.34268
MEAF6	6.19514e-39	-0.148873	-0.296157
TMEM158	6.96139e-39	-0.174412	-0.727619
RAB6A	7.17476e-39	-0.158801	-0.297057
ZC3H14	7.28448e-39	-0.142914	-0.225991
LIPH	8.17494e-39	0.00305652	3.11266
OLFM2	8.68319e-39	-0.203615	-2.18871
NETO2	9.49636e-39	-0.164529	-0.740305
CELA1	1.03813e-38	-0.389749	-4.38004
DPPA5A	1.04384e-38	0.0240936	1.27581
MXD4	1.13014e-38	-0.175332	-0.666402
PLEK2	1.16547e-38	0.0150503	1.61831
PSMC4	1.20195e-38	0.119931	0.230083
WNK1	1.20918e-38	-0.161009	-0.259435
POLR3K	1.21447e-38	-0.137185	-0.197932
RSPO1	1.22421e-38	0.0605793	0.304489
SRPK2	1.23762e-38	-0.16664	-0.403187
CERS4	1.40889e-38	-0.15663	-0.692582
KBTBD2	1.45468e-38	-0.160213	-0.50637
CDC42	1.65803e-38	-0.109378	-0.161389
AIMP1	1.68712e-38	0.11192	0.206761
VEGFA	1.68866e-38	-0.179286	-0.689153
MRPS12	1.87129e-38	0.148994	0.316575
TSC22D2	1.90286e-38	-0.169066	-0.45688
SDSL	1.92509e-38	-0.161371	-0.623424
KMT5B	2.36192e-38	-0.164839	-0.434818
EGLN1	2.60604e-38	-0.162977	-0.271489
ARMC10	2.63646e-38	-0.158441	-0.322434
NKD1	2.64949e-38	-0.010618	-0.123575
RPL28	2.94818e-38	0.0636378	0.0919161
RDH10	3.12364e-38	-0.173056	-0.861779
RANGAP1	3.37333e-38	0.160467	0.338826
KDM2A	3.50826e-38	-0.15979	-0.297947
TMEM163	3.73079e-38	-0.173871	-1.36489
[truncated: 10,403 more rows]

## Sheet: PhenoGraph cluster 2
gene	P-value (FDR adjusted)	MAST Hurdle	logFC
PTN	0	1.33863	1.96357
TMSB4X	0	0.997138	1.46522
SPRED1	0	0.677357	1.78171
BEX3	0	0.651979	0.963532
MLLT3	0	0.651614	1.77981
KLF3	0	0.643368	1.49204
HES3	0	0.604277	2.37951
NR2F6	0	0.583951	1.01273
IGDCC3	0	0.573757	1.62768
EFNB1	0	0.559408	1.48976
EN1	0	0.527313	3.1826
CHST2	0	0.469819	2.05919
SPRY2	0	0.414881	2.66471
POU3F2	0	0.290769	2.43727
FGF8	0	0.274472	3.70349
PLP1	0	0.266278	1.8227
FEZ1	0	0.257718	2.04254
IL17RD	0	0.212557	2.63196
PAX5	0	0.204354	3.59904
FLRT1	0	0.136629	2.48265
CLDN10	0	0.108785	3.71548
PAX8	0	0.107567	3.47388
EN2	0	0.0954801	3.67393
MYO5B	0	0.0733252	2.68987
SP9	0	0.0680681	3.52722
KLHL14	0	0.0483124	3.05713
GRIN2A	0	0.0476835	3.19615
FGF17	0	0.0363985	4.33452
MT-CO1	0	-0.456378	-0.676418
SMS	0	-0.529181	-0.879285
PLS3	0	-0.565569	-1.47801
FGFR2	0	-0.653371	-3.00076
IQGAP1	0	-0.764611	-2.67969
BASP1	0	-0.784039	-1.68711
PCSK1N	0	-0.965328	-2.6146
IGFBP2	0	-0.974055	-2.17241
CHCHD10	0	-1.09282	-3.95521
ERAS	0	-1.1015	-4.32366
PIM2	0	-1.11432	-3.52685
EPCAM	0	-1.38121	-4.12397
OTX2	0	-1.52681	-3.87685
ILDR2	2.02045e-303	0.661712	1.45775
FABP7	5.52665e-303	0.232865	2.03139
POU5F1	1.96478e-302	-1.47896	-3.31757
SOX21	5.34227e-297	0.7048	1.58144
TNRC18	5.02619e-292	0.381805	1.42159
ACER2	3.63774e-290	-0.833744	-2.19608
NAV2	4.06927e-286	0.439069	1.30886
PAX6	5.70635e-286	-1.54456	-3.99096
NPM3	1.60459e-276	0.403464	0.636297
PCDH17	1.09789e-273	0.0782297	2.69482
CCND1	3.43098e-273	0.614227	0.942678
SIX3	7.1536e-271	-2.37728	-4.74079
TUBB3	4.65409e-270	-0.643963	-2.18641
HESX1	4.74426e-266	-1.82966	-5.97028
EPHA4	3.66576e-265	-0.744958	-2.28268
MAN2A1	6.40743e-265	0.280125	1.46407
MRPS6	3.4778e-264	0.491568	0.927589
LHX5	6.73364e-263	-1.08341	-3.85118
IRX2	2.02034e-259	0.332278	1.76046
EFNB3	8.10213e-255	0.289643	1.47686
ABLIM1	7.17876e-254	0.333132	1.45591
UCP2	7.04754e-249	-0.493675	-2.13049
NAV1	2.07642e-247	0.56152	1.21766
CHD3	8.26726e-247	0.498991	1.16041
MYO10	8.3933e-247	-0.509837	-1.33123
GNG2	1.95557e-245	-0.414655	-1.48846
SGTB	1.37609e-243	0.113676	1.9884
AKAP12	2.47546e-243	-0.591592	-1.93064
SHISA2	1.28863e-241	-1.20129	-3.31607
NR2F1	3.2862e-241	0.579545	1.77536
MT-ND1	7.50696e-235	-0.46462	-0.714603
MORF4L2	9.43809e-235	0.382082	0.562516
MEG3	8.54314e-234	-0.643755	-1.22244
LMO1	3.36948e-233	-0.9592	-2.584
IRS4	1.44155e-232	-1.08639	-2.89344
COL2A1	7.24149e-230	0.41503	1.2713
FLRT3	1.11533e-228	0.578416	1.31452
SOX1	2.85902e-227	0.558906	1.20539
GBX2	6.71705e-226	0.296988	1.66431
EMB	8.05851e-226	-0.528308	-1.019
BNIP3L	2.69806e-225	0.33825	0.511366
PANTR1	9.77317e-222	0.114307	2.00889
SFRP2	8.94586e-221	0.472306	0.913905
C130026L21RIK	1.32309e-220	0.130628	1.87971
PAM	3.31904e-219	0.302838	1.46769
TSPAN13	2.28526e-218	0.485266	0.86708
L1TD1	2.77551e-215	-0.914855	-5.2866
CTXN3	1.32338e-214	0.00586488	4.62119
TSC22D1	1.78547e-214	0.460694	0.754268
FAM49B	1.43464e-213	0.399986	0.67823
NDN	9.49693e-213	0.542835	0.894989
LIX1	5.83347e-211	0.493016	1.37789
TSPO	1.37738e-208	-0.443906	-1.55547
CDH1	4.72809e-208	-0.906428	-4.76387
PDGFA	5.34616e-208	-0.509218	-1.44245
FOXD4	1.44874e-204	-1.20615	-4.8008
SPINT2	2.97996e-204	-0.487104	-1.65737
HDAC6	2.34474e-203	-0.523462	-1.61723
MN1	6.62783e-203	0.302127	1.38502
FNDC3C1	1.08311e-201	0.487504	0.983785
MT-CO3	1.88737e-201	-0.360708	-0.543251
RASGRP2	2.45467e-201	-0.584913	-1.79105
NKD1	4.32754e-201	0.341735	1.35787
CRABP1	2.34647e-199	1.0955	1.72865
TCEAL8	4.40211e-199	0.341833	0.518253
SOX13	1.64889e-197	0.364868	1.1488
PDHA1	4.99695e-197	0.412397	0.674146
SPRY1	4.24833e-191	0.217511	1.56154
PNP	5.65195e-191	0.387871	0.650803
MYCL	3.00061e-190	0.411082	1.20597
PHLDA2	2.08224e-186	-0.672071	-2.95511
TNFRSF19	2.42774e-186	0.448964	1.20933
RARG	6.22962e-184	-0.531144	-2.82343
CGNL1	2.58021e-181	-0.83859	-4.10629
POU3F3	3.54254e-181	0.0578149	2.24753
BEX1	4.69659e-180	0.279327	0.406367
KRT8	8.23625e-179	-0.529671	-2.18923
SLC5A3	7.05559e-178	0.191704	1.37387
FZD5	9.52587e-178	-1.07744	-3.86147
MARCKSL1	1.69417e-177	0.241739	0.345035
RFX4	2.94945e-174	0.423789	1.22984
TCF12	3.62431e-172	0.429926	0.719504
FGF18	6.94331e-172	0.0420564	2.59371
ZFP703	1.02028e-171	-1.04309	-3.59567
MEX3B	5.15791e-171	0.376801	1.18217
SERPINH1	5.8667e-170	0.409292	0.653248
FEZF1	6.55462e-170	-1.26	-4.45402
CELSR1	2.27228e-169	0.286789	1.18909
PCP4L1	2.39944e-169	0.038914	2.65724
RAX	2.6092e-169	-1.86234	-5.05617
SPSB4	3.11292e-169	0.302989	1.11045
GPM6B	6.00516e-169	0.0485832	2.28709
DNMT3B	1.35864e-168	-0.592989	-1.12222
EGFL7	1.58274e-168	-0.389714	-1.29118
X1700027J19RIK	1.61713e-168	-0.441822
CYP26A1	5.20724e-165	-1.27122	-5.30439
LY6E	1.15184e-163	-0.41373	-1.19408
ZFP36L1	3.21105e-163	0.504329	0.804989
FAM84B	9.77656e-162	0.118051	1.6634
HSPB1	3.80583e-161	-0.8578	-5.93298
X2610027F03RIK	3.62534e-160	0.0463059
SLITRK6	9.05712e-160	0.0115959	3.59027
LDHB	1.72479e-159	-0.499342	-0.913633
RASSF2	3.79955e-158	0.117119	1.58496
JAG1	4.71776e-158	0.301919	1.33513
ZBTB16	6.8924e-158	0.3523	1.14485
MT-ND4	1.10781e-157	-0.312361	-0.487703
SERPINB6A	4.72586e-157	-0.398007	-1.4714
NEBL	6.97118e-157	0.0728088	2.0216
IER2	8.35586e-156	0.394689	0.687344
EFNB2	7.72728e-155	0.416621	1.21628
S100A10	1.41502e-154	-0.405263	-1.5548
CNPY1	4.28239e-154	0.0163026	3.26808
NRP1	9.25015e-154	0.0956315	1.83484
TMSB10	9.77047e-153	-0.228296	-0.327971
KRT18	1.02404e-152	-0.442365	-1.51864
ALYREF	1.11431e-151	0.308893	0.449658
RAB25	1.40203e-150	-0.738663	-4.30525
MYLK	1.70902e-150	0.261982	1.31953
MIR124-2HG	4.46785e-150	0.355203	1.1048
HOXB2	4.47953e-149	-1.50505	-4.67441
WNT8A	4.71767e-149	-1.14167	-4.78961
ZFP423	6.87213e-149	0.302451	1.07313
STMN2	4.85831e-147	-0.524043	-1.06544
UBE2K	2.23901e-145	-0.318382	-0.612204
HS3ST3B1	5.33563e-145	0.0909156	1.78925
SHROOM3	1.59206e-144	0.244803	1.15737
SNRPN	2.32663e-144	-0.372363	-0.765504
TAL2	6.40541e-144	-0.718283	-2.52745
EPHA7	1.56112e-143	-0.688635	-2.06941
UPP1	3.17479e-143	-0.808976	-2.45733
ZSWIM5	7.56447e-143	0.118149	1.43378
DUSP9	1.96089e-142	-0.519373	-2.63276
FBLN2	2.62841e-142	0.137313	1.61586
HOXA1	2.67299e-142	-1.94744	-5.65
PDLIM1	1.30849e-141	-0.549961	-3.39648
CERS4	3.06381e-140	-0.459402	-2.12698
CRIP1	3.4873e-140	-0.42934	-1.8418
CXCL12	4.4698e-140	-0.758582	-3.79497
PEG12	7.13308e-139	0.289442	1.16826
BHLHE41	1.66373e-138	0.0587081	2.01901
DUSP6	6.48472e-137	0.126832	1.63561
F11R	2.16994e-136	-0.426509	-1.96583
FZD2	2.27628e-136	-0.348492	-0.803483
ISM1	2.18607e-135	0.0250365	2.67904
FBLIM1	3.93757e-135	-0.556033	-3.11337
SP8	7.27562e-135	0.39523	1.02472
APOC1	5.12218e-134	-0.581771	-3.22601
PPP1R14A	8.06068e-134	-0.617534	-4.2674
ZSCAN10	1.00673e-133	-0.465751	-2.2436
TMEM238	4.53046e-132	-0.539076	-2.65264
LHX2	1.08833e-131	-1.1927	-3.05994
HOXB1	1.39798e-131	-1.41438	-5.2247
ZDHHC2	2.22154e-131	-0.381662	-1.70627
INA	7.62989e-131	-0.46469	-1.4161
CLDN6	8.48978e-131	-0.95177	-4.80762
EPB41L4A	1.0139e-130	0.185349	1.32407
MEIS2	1.40462e-130	-0.552934	-1.02421
EHBP1	1.40462e-130	-0.574043	-1.8962
RBP1	1.80709e-130	0.73787	0.928276
ECI1	5.86451e-130	-0.452619	-1.67752
AQP11	2.41871e-129	0.174505	1.26071
FKBP11	1.17894e-128	-0.353704	-1.03141
LARP7	7.83393e-128	-0.372888	-0.726536
RAI14	9.28801e-128	0.261866	1.07493
TCFL5	9.9181e-128	-0.345489	-1.13188
X2900011O08RIK	2.09518e-127	-0.526804
COX7C	3.43294e-127	-0.19894	-0.286407
ZCCHC7	9.23833e-127	0.338611	0.659414
MT-ND2	1.08682e-126	-0.282746	-0.428833
ALDH1A2	1.2076e-126	-0.830262	-4.03647
RGS2	1.90987e-126	0.128077	1.53188
FZD3	4.41384e-126	0.380039	0.854007
IRX3	9.58311e-126	0.639311	1.00866
SALL4	5.30587e-125	-0.368256	-0.81817
CKB	9.90236e-125	-0.517419	-1.56601
CLU	1.37386e-124	-0.519656	-2.63068
WBP5	1.55334e-124	0.23398	0.343129
DAB1	2.9606e-123	0.24962	1.01303
BOC	3.81956e-123	0.116844	1.58251
X1110008P14RIK	4.5965e-123	-0.310232
BEX4	5.02205e-122	0.252184	0.341372
NRIP1	9.80638e-122	0.432304	0.95507
ELMOD1	9.80952e-122	0.030955	2.46241
SLC2A3	2.71441e-121	-0.356935	-0.744018
FAM117A	3.28786e-121	-0.394976	-1.86271
DACT2	4.86395e-121	-0.695153	-4.48546
SAP30	7.00372e-121	0.314046	0.503379
CUEDC1	4.38224e-120	0.350879	0.858598
HMGA2	3.23462e-119	0.354745	0.547337
AP1M2	5.27972e-118	-0.701295	-5.15906
FUOM	6.40966e-118	-0.621846	-4.32235
MT-ND6	1.70348e-117	0.44497	0.791989
CCND2	3.74248e-117	0.674214	0.981685
MYCN	6.53565e-117	0.481741	0.861873
HNRNPH3	7.57638e-117	0.253842	0.37736
KRTCAP3	9.76866e-117	-0.50167	-3.25033
FAM181A	1.03957e-116	0.0980665	1.62996
CELA1	1.08672e-116	0.0205533	2.72409
VEZF1	7.41765e-116	0.341359	0.570702
BZW2	7.718e-115	0.232098	0.329905
VRTN	2.47022e-114	-0.60315	-4.04069
ERMN	2.7566e-114	-1.26221	-6.24202
FAM181B	3.64779e-114	0.475981	1.02116
HMGB3	4.56342e-114	0.221225	0.298908
MT-ATP6	7.24499e-114	-0.259585	-0.390453
HNRNPF	1.33243e-113	0.212571	0.310526
PHLDA3	1.9675e-113	-0.594996	-2.18555
TMEM132C	2.50447e-113	0.154124	1.27656
LGALS1	9.65786e-113	-0.360205	-1.10133
ACADL	3.13128e-112	-0.341703	-1.3524
AKR1B3	3.8515e-111	0.290068	0.448338
RPL37A	3.86684e-111	-0.169175	-0.242317
EMX2	7.09481e-111	-1.23883	-5.35726
GM10076	1.29232e-110	-0.463095	-0.69107
MID1IP1	1.40882e-110	-0.380583	-1.50011
EIF1B	1.5425e-110	0.228222	0.329072
SERF1	1.78725e-110	0.438099	0.693842
GPC3	1.14351e-109	-0.394395	-0.997993
IGF2BP3	1.47246e-109	0.277318	0.427232
STX3	5.94301e-109	-0.410534	-1.82607
PKNOX2	9.57244e-109	0.217328	0.953994
SEZ6L	1.19028e-108	0.0098698	3.15847
MT-ND5	8.33413e-108	-0.25895	-0.451137
MKRN3	8.5804e-108	0.152582	1.2836
WFDC2	1.12305e-107	-0.421933	-1.08307
SNRPF	4.02359e-107	0.21218	0.297075
JPH4	4.84246e-107	-0.406257	-1.86354
EML5	1.89612e-106	0.118706	1.2869
GM9493	3.72086e-106	0.220918	0.325569
SKIDA1	4.56469e-106	0.276841	0.897736
CELF2	8.05242e-106	0.360533	0.837824
GM26917	1.99679e-105	0.407941	0.644958
RGMA	2.0123e-105	-0.290103	-0.853046
LACTB	2.81163e-104	0.224026	0.854616
LRRTM1	4.29263e-104	0.00837222	3.39942
WWC1	4.30475e-104	0.279287	0.780853
APOE	4.4869e-104	-0.398593	-0.816983
FEZF2	4.82473e-104	-1.02079	-5.30893
OXCT1	4.99197e-104	-0.390282	-1.34209
PLIN3	5.98561e-104	-0.334482	-0.975285
ATP6V1F	1.61923e-103	-0.224251	-0.428796
GM2694	2.26038e-103	0.425272	0.882978
PLCH1	3.84132e-103	0.269699	0.84067
BMP7	4.74383e-103	-0.439513	-2.55967
X1810058I24RIK	5.91862e-103	-0.222613
X1700025G04RIK	1.24563e-102	0.326709
PKDCC	1.44423e-102	-0.435015	-1.21248
MSX3	1.72584e-102	0.0970586	1.63864
RPL37	3.124e-102	-0.180821	-0.253885
HOPX	6.04873e-102	-0.585687	-2.19575
TTC3	7.51991e-102	0.243094	0.321748
TES	1.3044e-101	-0.352406	-1.75113
NKX6-2	3.37552e-101	0.117875	1.73089
CMTM8	7.2622e-101	-0.322954	-1.03014
RPS29	1.87335e-100	-0.205726	-0.293096
FAM57B	2.18668e-100	-0.359454	-1.44712
TOMM7	3.42131e-100	-0.202889	-0.344185
RSPO1	4.57202e-100	-0.459152	-2.32873
CLDN7	3.33737e-99	-0.755443	-4.33681
NRARP	4.0305e-99	0.0946387	1.47768
CLEC2L	4.2654e-99	0.073513	1.63501
SPEG	8.05365e-99	-0.336077	-1.40072
CAPG	9.99559e-99	-0.442658	-2.8766
TUBB6	2.07816e-97	-0.33629	-1.35817
CALCA	4.61512e-97	-0.537486	-2.31499
NOTUM	5.55549e-97	0.0313451	2.23872
SSSCA1	1.34878e-96	-0.26943	-0.513003
SOX4	4.30911e-96	0.286835	0.42089
MT-CO2	9.68286e-96	-0.207991	-0.330826
GMFG	1.85905e-95	-0.360424	-1.97733
HIGD1A	2.09091e-95	0.209218	0.304213
SALL1	5.3419e-95	-0.367531	-1.16066
BICC1	9.56338e-95	0.108063	1.33859
H2AFJ	1.17854e-94	-0.237754	-0.493227
CXCR4	1.49095e-94	0.13067	1.16533
SPINK1	2.73186e-94	-0.5872	-3.30055
FZD10	3.31854e-94	0.161665	1.13056
MCF2	3.89626e-94	-0.40722	-1.96518
TOP2B	4.92458e-94	0.318122	0.566466
MAP7	5.92933e-94	0.0814398	1.3844
VIM	8.47579e-94	-0.37351	-1.15055
CDX1	1.00022e-93	-1.78463	-4.98217
RTN1	1.18249e-93	0.250985	0.954955
YDJC	3.06671e-93	-0.343019	-1.55434
PMVK	7.83513e-93	0.270491	0.556498
EGLN1	1.8355e-92	0.31482	0.526642
KIF21A	2.02611e-92	-0.3285	-0.748011
LDHA	2.32828e-92	0.12249	0.174849
GRRP1	2.78922e-92	-0.355362	-1.39131
ETV5	4.33509e-92	0.116129	1.30502
A430005L14RIK	2.31676e-91	0.269848	0.469433
DYNLL1	3.10189e-91	-0.155812	-0.226679
JUND	4.22374e-91	0.319315	0.531402
SEMA6A	8.73496e-91	-0.402046	-1.52996
IRX4	6.42163e-90	0.0104493	3.10378
PFDN2	8.46749e-90	0.211085	0.301611
DSP	8.63202e-90	-0.426353	-2.70314
RPA3	1.94547e-89	0.307714	0.494396
NANOG	4.17003e-89	-0.617536	-4.3255
VANGL2	1.79839e-88	0.29997	0.575453
NECTIN2	1.85711e-88	-0.3363	-0.968281
MAML3	1.94182e-88	0.276133	0.758446
WLS	2.30347e-88	0.650878	0.744537
POU3F1	5.30265e-88	-0.397233	-0.812891
CDKN1C	1.05391e-87	-0.389518	-0.954971
HSP90AB1	1.09738e-87	-0.148409	-0.213322
PAX2	2.13591e-87	0.284901	1.01912
GSTM5	2.28496e-87	0.269932	0.446528
PCSK2	3.72812e-87	-0.48182	-3.26551
EFNA5	4.47576e-87	0.368902	0.734777
OGFRL1	4.92485e-87	-0.309923	-1.29168
RPS18	1.58272e-86	0.111581	0.155835
FAM132A	6.80063e-86	-0.323142	-2.0518
GNAZ	7.44716e-86	0.0724355	1.29515
NDRG2	9.11047e-86	-0.468985	-3.46353
TNNT1	1.01154e-85	-0.334128	-1.86
H19	2.09395e-85	-0.306565	-1.26097
AGPAT2	2.37876e-85	-0.333426	-1.98823
COX6B2	4.07334e-85	-0.299119	-1.04948
STK26	4.83167e-85	-0.37583	-2.33873
CRB3	9.83181e-85	-0.592289	-4.19995
GOLM1	1.1044e-84	0.257057	0.431921
FGF15	1.13896e-84	0.281166	1.04134
RNF130	1.5131e-84	0.261995	0.633105
SH3PXD2A	1.69158e-84	0.071885	1.3579
OAT	1.70643e-84	-0.345563	-0.900318
LSR	2.11112e-84	-0.278479	-0.727312
PARVB	2.13288e-84	-0.377415	-3.04252
DLG1	3.33903e-84	0.288669	0.64416
IRF2BP2	4.41465e-84	0.237745	0.860142
ID2	3.46798e-83	0.464752	0.742321
ANXA7	4.22923e-83	-0.295804	-1.54872
ATP5K	9.1543e-83	-0.254576	-0.438883
PHYHIPL	9.81683e-83	0.133199	1.05844
CEP170B	1.26269e-82	-0.346347	-2.25157
GNG3	1.46854e-82	-0.315547	-1.03179
TCF7L1	1.28088e-81	-0.322773	-0.841581
SELENOF	1.71073e-81	0.201469	0.270315
DSG2	3.95308e-81	-0.518851	-3.62432
RBM3	6.58425e-81	0.171681	0.229181
MKRN1	1.64573e-80	0.31692	0.514011
BC024139	1.83795e-80	0.0276716	1.94394
MPPED2	2.67977e-80	-0.295708	-1.17032
ACTG1	3.73244e-80	-0.173126	-0.256074
IGF2BP1	3.74264e-80	0.220017	0.296562
IRX5	3.98876e-80	0.41298	0.708961
MAPK13	4.34099e-80	-0.432557	-3.33694
OLA1	2.40368e-79	0.182996	0.240181
RGS10	2.61624e-79	-0.291423	-1.38148
NPL	3.34225e-79	0.0968856	1.19389
VAMP8	3.66135e-79	-0.324028	-1.31229
SEMA3E	4.46804e-79	-0.86462	-4.77741
GPRC5C	4.78385e-79	-0.336848	-1.31185
X1700013H16RIK	5.10467e-79	-0.327132
PFN2	6.50736e-79	0.293398	0.578124
HNRNPK	7.93258e-79	0.146788	0.193867
NREP	7.99377e-79	0.317981	0.757502
UBQLN2	2.51e-78	0.249075	0.410385
TUBB4A	3.65824e-78	-0.305077	-1.06946
NBL1	3.94412e-78	-0.525299	-3.66369
C030018K13RIK	5.64754e-78	0.0268338	2.03947
MIP	8.45019e-78	-0.525121	-4.04789
SLC25A5	1.00935e-77	0.206853	0.291426
MT-CYTB	1.06589e-77	-0.219294	-0.348546
ARID3A	1.88257e-77	-0.298804	-0.942622
ATP5L	2.0959e-77	-0.207217	-0.360695
POU3F4	2.09656e-77	0.0543198	1.57354
TRAK1	2.24605e-77	0.131147	0.872301
PLPP2	2.72512e-77	-0.303994	-1.54276
MTAP7D3	4.35731e-77	-0.335185	-1.25998
X0610040J01RIK	4.61104e-77	0.0262887
TMEM88	5.54544e-77	-0.288169	-1.30982
X2610318N02RIK	6.61553e-77	0.237042
H2AFY	1.07783e-76	0.279228	0.427843
HOXA2	1.47708e-76	-0.855227	-4.02581
ZFHX4	1.70096e-76	0.190759	1.00176
H2AFY2	2.00489e-76	0.214534	0.328841
GALT	4.72412e-76	-0.327329	-2.13056
SOCS6	1.09949e-75	0.239932	0.586659
FOXD1	1.22013e-75	-0.921776	-3.14364
GM6133	1.47691e-75	0.299037	0.585186
RBPMS	1.51839e-75	-0.257563	-0.670779
WIF1	5.48005e-75	0.0217297	2.25413
UTF1	6.53578e-75	-0.729476	-4.67527
RPS21	9.20113e-75	-0.145575	-0.206878
GAP43	1.19338e-74	-0.30967	-1.17367
QPRT	1.72974e-74	-0.273193	-1.07509
GSC	1.74849e-74	-0.977166	-5.06846
MT-ND4L	2.39954e-74	-0.219638	-0.3814
RHOB	2.52967e-74	0.170051	0.939917
ARL5B	3.31636e-74	0.225627	0.685912
G3BP1	1.12545e-73	0.175662	0.213648
DTX4	1.55606e-73	0.167437	0.839034
MAGOH	4.55244e-73	0.162889	0.223723
GREB1	7.22951e-73	0.249526	0.479981
IGFBPL1	1.0424e-72	-0.318687	-1.19212
ZFP422	1.21057e-72	0.287179	0.495243
ADAMTS9	1.35609e-72	0.117955	1.13329
PNMA2	1.93523e-72	-0.273246	-1.42853
BCAT1	2.01641e-72	0.253339	0.466504
RAP2B	2.7394e-72	0.239369	0.616838
NPM1	7.66844e-72	0.104576	0.143333
PPP1R1A	7.72549e-72	-0.260324	-0.750418
C130073E24RIK	7.75943e-72	0.0136652	2.70792
SULF1	9.13329e-72	-0.314853	-1.09032
HIST1H2AP	2.23338e-71	-0.65564	-1.09022
SOX9	3.31281e-71	-0.399698	-1.19104
NKX6-1	4.98505e-71	0.163624	0.991271
MIRG	5.36868e-71	-0.301225	-1.20664
LLGL2	2.58583e-70	-0.370797	-2.5716
IRF2BPL	5.02418e-70	0.200058	0.928338
ARGLU1	6.69687e-70	0.175259	0.218067
CDC42	1.39938e-69	0.161075	0.229944
TRA2A	1.45642e-69	0.203884	0.27626
CABP7	1.47729e-69	-0.546758	-4.26518
REEP5	1.87541e-69	-0.25072	-0.759978
RPL6	1.89851e-69	-0.120612	-0.167628
PPA1	2.23611e-69	0.166752	0.225384
WHSC1	2.57907e-69	0.241273	0.372758
TMED2	2.57907e-69	0.207987	0.308748
HIST1H2AK	2.75573e-69	-0.50306	-0.928878
THSD7A	3.10804e-69	-0.398722	-2.68934
IRX1	5.31807e-69	0.232073	0.701846
TM9SF3	7.9842e-69	0.242112	0.399265
ESRP1	8.10382e-69	-0.577916	-4.46713
MAP1B	8.11179e-69	0.244711	0.359964
MYL7	1.56144e-68	-0.326825	-2.27152
CSRP2	1.79162e-68	-0.241388	-0.540591
TXNDC17	3.13157e-68	-0.16568	-0.303263
EEF1B2	3.53857e-68	0.0900994	0.13063
LMO4	4.14483e-68	-0.259882	-0.537899
GREB1L	6.41338e-68	-0.274861	-0.684977
UBE2G1	6.58038e-68	0.241981	0.46313
RNF32	9.69397e-68	0.0544754	1.4591
GALNT7	9.90787e-68	0.245397	0.722365
D1ERTD622E	1.67183e-67	0.117474	1.05602
RPL9-PS6	1.67838e-67	0.181233	0.254541
VGLL4	1.97289e-67	0.216793	0.755967
OTX1	2.03308e-67	-0.484368	-1.63387
RPL27-PS3	2.19193e-67	0.172542	0.248267
ADAM10	2.38504e-67	0.198858	0.772694
HS6ST1	3.36657e-67	-0.283381	-0.94855
UBL4A	4.24045e-67	-0.224352	-0.595613
OST4	4.84042e-67	0.190056	0.292657
RSL24D1	5.0021e-67	0.206916	0.317539
DDT	5.86254e-67	-0.194816	-0.35877
PDIA5	1.13174e-66	0.109122	0.982531
SALL3	1.17125e-66	-0.309299	-0.902509
SOD2	1.2226e-66	0.2297	0.393848
AUTS2	1.51958e-66	0.264774	0.454228
AES	1.57854e-66	-0.254435	-0.589383
EIF4EBP1	1.83861e-66	-0.203674	-0.411106
EYA2	2.14538e-66	-0.436009	-3.39077
MTAP	2.52577e-66	0.225199	0.367745
MRPL34	4.56685e-66	-0.244148	-0.445399
ZCCHC18	5.40415e-66	0.155155	0.821377
TMEM51	6.47744e-66	-0.386	-3.0887
FABP3	8.98728e-66	-0.292942	-1.94697
PDLIM2	1.24163e-65	-0.282146	-2.00245
TSPAN6	1.60702e-65	0.218511	0.353142
RP23-181A8-2	1.75313e-65	0.00505353
X1810022K09RIK	1.85995e-65	-0.217098
SMIM22	2.27469e-65	-0.297407	-2.13196
ACRBP	2.88785e-65	-0.273013	-1.2781
ZC3H12C	6.20649e-65	0.0621955	1.3303
CDX2	7.51152e-65	-1.85797	-6.41033
PJA1	9.19038e-65	0.266624	0.456904
ECHDC2	1.41182e-64	-0.279797	-1.26226
MYRF	1.83877e-64	-0.304359	-2.1502
SFRP5	1.86391e-64	-0.451331	-3.01001
CELSR2	2.51745e-64	0.224371	0.658418
IFITM3	2.6624e-64	0.256335	0.758947
RPS2	2.7157e-64	0.119529	0.174655
ANP32A	2.8291e-64	-0.128764	-0.208933
SLCO3A1	1.06989e-63	0.103198	1.05571
CD24A	1.09778e-63	0.293142	0.427271
VSTM2B	1.84068e-63	0.258812	0.749846
HPGDS	2.92292e-63	0.026824	1.91096
CARHSP1	3.08899e-63	-0.226381	-0.601023
WDR83OS	3.40743e-63	0.216879	0.374709
PRRX1	4.27043e-63	-0.314815	-1.98389
RAB28	5.63602e-63	0.228544	0.515057
HS2ST1	9.3645e-63	0.230917	0.50069
ACOT9	9.91351e-63	-0.249398	-1.65717
HNRNPA1	1.02661e-62	0.107065	0.150019
SLIT3	1.05178e-62	-0.333994	-1.93557
MAB21L2	1.14122e-62	-0.606005	-2.62431
LIN28A	1.16985e-62	-0.202403	-0.431689
MECOM	1.80189e-62	-0.371634	-2.31755
HES5	1.87175e-62	0.27802	0.781203
HSP90AA1	5.8876e-62	-0.161506	-0.24853
RP9	7.05636e-62	-0.234415	-0.724335
FGF5	8.01e-62	-0.821785	-6.22987
PID1	1.0368e-61	-0.359287	-2.493
IGFBP5	1.15056e-61	0.295501	0.717384
PODXL2	1.33574e-61	0.0943974	1.04006
HS3ST3A1	1.72197e-61	0.0120157	2.46543
NRG1	1.82935e-61	-0.43478	-2.36354
APELA	2.52232e-61	-0.434146	-2.1378
MAF	2.64257e-61	-0.612994	-2.62343
PTEN	2.81805e-61	-0.204674	-0.5185
ARID3B	3.29758e-61	-0.265996	-0.748204
PPT1	4.70883e-61	0.193724	0.63725
AR	6.39152e-61	0.0845216	1.10576
SELENOK	1.03081e-60	0.190315	0.288276
IL6ST	1.03423e-60	0.155135	0.79801
X2610028E06RIK	1.44556e-60	0.023676
IMPDH1	1.47394e-60	-0.242849	-0.879042
ENC1	1.52788e-60	0.199135	0.779376
TMEM55A	1.9683e-60	0.207925	0.585319
HSD17B12	2.43668e-60	0.211227	0.368234
RPL27	2.43668e-60	0.148261	0.204163
DPYSL2	2.79236e-60	0.26203	0.519701
GM42637	2.82914e-60	-0.294322	-1.93838
KLF9	3.1541e-60	-0.282312	-1.28013
LSAMP	3.16434e-60	0.0862363	1.11326
RND3	4.20025e-60	0.238142	0.641236
RPL41	5.02968e-60	-0.108429	-0.151466
PAPPA	5.8388e-60	0.0710497	1.28604
ELAVL2	7.1766e-60	0.246847	0.623798
FAM13C	8.02346e-60	0.0874826	1.14406
BAHCC1	1.45917e-59	0.202921	0.603296
COPZ2	2.29528e-59	0.109626	1.01753
HNF1B	4.84388e-59	-1.22696	-8.2828
UBE2E1	5.73081e-59	0.182555	0.274706
TCEA3	7.20898e-59	-0.29708	-2.3552
PALM3	7.65157e-59	-0.305808	-2.09393
ELFN1	9.70792e-59	0.0216581	1.99981
FGFR1	1.11039e-58	-0.249291	-0.506386
OTX2OS1	1.67612e-58	-0.558327	-5.0655
TCEAL1	1.72026e-58	0.123714	0.890292
KBTBD11	1.95834e-58	0.168571	0.840448
RBPMS2	3.34462e-58	-0.254276	-0.696872
DMRT3	3.44311e-58	-0.488221	-3.49108
RPL31	4.13998e-58	-0.104474	-0.162807
PCNA	5.00753e-58	0.223668	0.355195
MDK	5.63846e-58	-0.161596	-0.272418
RPL35	6.35459e-58	-0.17309	-0.25648
SPARC	7.3388e-58	-0.254458	-0.584928
KLC3	7.63174e-58	-0.253358	-1.91958
SOX3	1.2372e-57	0.297636	0.472691
RNF7	2.08172e-57	0.149637	0.195063
KDF1	2.28777e-57	-0.564284	-5.76361
X1810011O10RIK	2.63846e-57	0.0355852
SMIM3	2.82423e-57	0.144078	0.830613
CYB5R1	2.82423e-57	-0.237192	-0.953837
PSIP1	2.92645e-57	-0.13714	-0.228525
LRRC4B	3.55366e-57	0.0967031	0.986684
SLC7A3	4.04711e-57	-0.300397	-1.62493
SEMA3A	5.64191e-57	0.0607763	1.29334
TXNRD1	6.28077e-57	0.19151	0.2728
RPS27	6.832e-57	-0.135392	-0.197895
BTF3L4	7.37288e-57	0.17516	0.263075
KIF1B	8.21038e-57	0.263602	0.448244
PEA15A	9.86662e-57	0.211961	0.578631
AP1S1	1.15473e-56	0.208045	0.401839
CCDC112	1.16679e-56	-0.250327	-0.852491
SERTAD1	1.44179e-56	-0.230479	-1.48617
MPC2	1.57698e-56	0.199395	0.528263
PALLD	1.70933e-56	0.352786	0.580699
GM9844	1.73794e-56	-0.219714	-0.561765
TPT1	1.96516e-56	0.087316	0.117174
SLC2A1	2.26693e-56	-0.250434	-0.44449
SNX1	3.58308e-56	0.213688	0.533355
NKX1-2	3.7509e-56	-0.622076	-2.92085
PIP5K1B	3.89981e-56	0.0411069	1.48236
SMAD1	3.94541e-56	0.231759	0.587973
B230312C02RIK	3.97907e-56	-0.363525	-0.911151
PCBP3	5.31725e-56	0.151064	0.656973
ROBO3	5.78093e-56	-0.759504	-6.08095
AXIN2	7.37981e-56	0.277075	0.673914
TRH	8.27915e-56	-0.64417	-3.17391
DKK1	8.61883e-56	-0.525009	-1.9184
ADK	8.62228e-56	0.201613	0.3422
GNGT2	9.41205e-56	-0.251039	-1.5808
ATR	1.01596e-55	0.213493	0.570568
B3GNT7	1.09569e-55	-0.329117	-2.48699
RTN4RL1	1.53677e-55	-0.332254	-3.19259
EMILIN2	1.55967e-55	0.0788684	1.13784
UQCR11	3.25098e-55	-0.144421	-0.236759
RBMS3	4.69278e-55	0.0693405	1.15926
OLFML3	8.85581e-55	0.0717753	1.20389
RSPO3	9.86833e-55	-0.380504	-2.9641
EDARADD	1.09573e-54	-0.466403	-3.48207
PET100	1.12927e-54	-0.206992	-0.562157
FARP1	1.3594e-54	0.151095	0.710016
CELRR	1.59391e-54	0.03392	1.70247
D030056L22RIK	1.75375e-54	0.208673	0.404763
ELAVL1	2.06026e-54	0.169205	0.248395
FLNA	2.94688e-54	-0.259876	-0.654358
PATJ	3.34967e-54	-0.256708	-2.13506
POLR2L	3.95897e-54	-0.242037	-0.562124
SLC29A1	4.52412e-54	0.148653	0.745555
NDFIP2	4.72045e-54	0.21458	0.530951
MPP6	4.74348e-54	0.199973	0.314157
ANXA4	7.26084e-54	-0.349715	-3.18393
SH3GL3	7.3378e-54	-0.252851	-1.75308
TRIM8	8.76468e-54	0.205914	0.552611
PCDH8	1.20129e-53	-0.394526	-2.41004
LRP2	1.7951e-53	-0.271653	-0.838458
METTL9	2.70439e-53	0.162344	0.245238
ELAVL3	3.34204e-53	-0.288571	-1.80916
RAP1A	3.61468e-53	0.207847	0.345774
TUBGCP2	4.03199e-53	0.197932	0.494436
TUBA1B	4.43845e-53	0.13342	0.176166
WSB1	4.91425e-53	0.229258	0.48166
NKAIN4	4.91425e-53	0.0541173	1.34433
COX5B	4.9916e-53	-0.140383	-0.244777
ZFP985	4.9916e-53	-0.266927	-1.98057
HNRNPR	5.99344e-53	0.159884	0.196386
CFAP20	6.83176e-53	0.179535	0.287074
RNF122	6.87172e-53	0.118752	0.837282
SNX30	8.42329e-53	0.14157	0.726024
RPL38	9.2882e-53	-0.134461	-0.192352
URAH	1.55836e-52	-0.241639	-1.97892
MAPK10	1.56119e-52	0.0534449	1.25767
PDCL3	1.86226e-52	0.198507	0.344814
GM26700	1.92533e-52	0.0378213	1.61039
TCEAL3	2.08394e-52	0.0754462	1.07875
PDK1	2.09649e-52	0.218931	0.519361
LPGAT1	2.52422e-52	-0.250395	-1.50957
SIVA1	2.56058e-52	-0.134748	-0.213572
GPX1	2.56058e-52	-0.150086	-0.277304
ZFP521	2.60379e-52	0.16558	0.64321
SH3BGRL	2.68634e-52	0.198092	0.311232
MPHOSPH8	3.66074e-52	-0.175567	-0.35778
RPL36	6.11685e-52	-0.10873	-0.162056
NFIB	6.31307e-52	-0.435471	-3.48954
OAZ1	6.64355e-52	0.0972737	0.141059
SOCS2	6.70852e-52	-0.286649	-0.722699
TMEM255A	7.11724e-52	0.0151549	2.21433
CITED2	7.84533e-52	0.324985	0.472859
CCNB1IP1	7.8824e-52	-0.387411	-3.16058
X1700019D03RIK	8.05208e-52	-0.285573
CAMK2N2	8.58214e-52	0.174326	0.631431
CETN3	1.11138e-51	0.172244	0.251716
COX7A2	1.16626e-51	-0.109342	-0.17677
ME3	1.41349e-51	0.0453074	1.41628
NDUFA12	1.71974e-51	-0.193126	-0.353323
MICAL1	1.9211e-51	-0.227465	-1.17389
SCG5	2.05035e-51	0.181802	0.709954
STAP2	3.28706e-51	-0.21694	-1.42562
PCNT	3.5404e-51	-0.268749	-0.85055
MSMO1	3.56228e-51	0.185446	0.601455
MED21	3.56228e-51	0.185195	0.310964
CAMK2D	4.21912e-51	0.0997489	0.916262
ZMIZ1	4.26666e-51	0.231017	0.461584
APLP2	4.68282e-51	-0.193225	-0.457117
SOX5	4.92067e-51	-0.283443	-1.58182
CHIC2	4.98876e-51	0.194888	0.331977
IFT43	7.0556e-51	-0.190103	-0.45866
SDK2	9.09824e-51	-0.268003	-2.15816
GM2000	9.1979e-51	0.158116	0.223606
GRB14	9.92345e-51	-0.317966	-2.86081
GPR153	1.31174e-50	0.076796	0.966334
PPFIBP1	1.7022e-50	0.190762	0.542288
MEOX1	1.75521e-50	-0.642657	-5.04217
CBX7	1.88873e-50	-0.232569	-1.5981
PLATR10	2.05388e-50	-0.729044	-6.64433
GALNT1	2.33136e-50	0.255419	0.492892
E130012A19RIK	2.64133e-50	0.258116	0.427801
PRSS23	3.77608e-50	0.131598	0.922985
CDH22	4.08176e-50	0.016425	1.99742
UBE2QL1	5.02308e-50	0.0459779	1.38694
ELOVL6	5.65569e-50	0.195557	0.549111
IFITM1	6.99161e-50	0.290275	0.529116
DST	8.24231e-50	-0.272812	-0.71469
TPM2	8.71047e-50	-0.210399	-0.657896
TMA7	1.12079e-49	-0.106875	-0.174879
CD44	1.17788e-49	-0.248947	-2.08974
TTR	1.21488e-49	-0.322304	-3.42471
TUBA4A	1.51478e-49	-0.25959	-2.38229
X3110082J24RIK	2.27653e-49	0.0346951
TSNAX	2.56237e-49	0.225427	0.420319
ALKBH7	3.15687e-49	-0.230396	-0.872551
ATP5B	3.29738e-49	-0.150655	-0.254576
JAKMIP1	3.30661e-49	-0.410634	-3.64319
SPRED3	3.30914e-49	0.102079	0.92222
PRSS8	3.33348e-49	-0.271017	-2.39626
GM26735	4.12411e-49	0.149216	0.718766
GPC4	4.96316e-49	-0.253834	-1.65011
PLEKHA2	7.32582e-49	-0.25035	-2.2685
TMEM108	8.34341e-49	-0.279905	-0.875063
TBC1D16	8.61089e-49	0.212258	0.427719
FAM173A	1.07961e-48	-0.207455	-0.618327
COPS6	1.0855e-48	-0.175474	-0.392896
ALAD	1.28546e-48	0.215944	0.395427
ISYNA1	1.31755e-48	-0.220921	-0.551019
ORC6	2.23097e-48	0.179195	0.275228
SHB	2.50394e-48	-0.243987	-1.38479
DZIP1	3.4729e-48	0.111589	0.826808
EDNRB	5.22508e-48	0.0312839	1.57219
EIF1AX	7.12574e-48	-0.124728	-0.215741
PTP4A2	7.23293e-48	0.19312	0.27919
SPRED2	7.90682e-48	0.16516	0.615701
GRB7	8.21965e-48	-0.23709	-1.18058
VAPA	8.64362e-48	0.140889	0.183769
ZFP706	9.23721e-48	0.143721	0.205596
MOV10	1.11391e-47	-0.296412	-2.90417
FXYD7	1.11846e-47	-0.310376	-2.71846
LDB1	1.34894e-47	0.217616	0.406875
TSPAN17	1.41997e-47	-0.469477	-5.11864
ERDR1	1.42949e-47	0.191581	0.240815
FHDC1	1.8623e-47	-0.258121	-1.79276
BMI1	1.96331e-47	0.159633	0.669156
RHEB	2.10554e-47	0.166486	0.237657
EFCAB6	2.29133e-47	-0.504438	-4.84659
BACH1	2.59327e-47	0.172256	0.570379
PCDH1	2.61476e-47	-0.237753	-1.42542
TESC	2.80225e-47	-0.293178	-2.90786
WNT5B	3.13919e-47	-0.243264	-1.28337
GJC1	3.36521e-47	0.207713	0.366456
UNC5B	3.70366e-47	-0.228261	-1.7165
RAB11FIP1	4.23154e-47	0.163205	0.662587
EPS8	4.32913e-47	0.12829	0.77173
CDH4	4.81101e-47	0.115788	0.843796
BLVRB	5.22841e-47	-0.200911	-1.07254
TPM1	5.2321e-47	-0.192521	-0.408179
MACROD2	5.68818e-47	0.184393	0.566833
CALD1	6.93463e-47	-0.224672	-0.493664
ATP5J2	8.82621e-47	-0.113126	-0.173827
MUM1L1	9.10443e-47	0.131363	0.677049
STARD10	9.18348e-47	-0.211147	-1.05086
GM5786	9.33476e-47	0.212694	0.514611
BAIAP2L1	1.10818e-46	-0.218735	-0.857149
MSN	1.19483e-46	-0.192786	-0.548622
IVNS1ABP	1.29809e-46	0.197497	0.313976
CDPF1	1.47632e-46	-0.204056	-0.872452
PROX1	2.02584e-46	0.0696964	1.05085
PPDPF	2.13724e-46	-0.163524	-0.36145
NDUFV3	2.39357e-46	-0.168927	-0.326532
ARHGEF28	2.5697e-46	-0.289386	-2.63895
ARX	2.62356e-46	-0.750009	-4.0147
MAPK8IP1	3.01062e-46	0.170023	0.514675
LMAN1	3.26145e-46	-0.197475	-0.455327
MCF2L	3.56454e-46	0.0733448	0.98064
SON	3.91738e-46	-0.150625	-0.307759
CHST15	4.24615e-46	-0.297627	-2.75252
PSMB5	7.38633e-46	-0.117434	-0.177445
TAC1	9.54287e-46	-0.382951	-3.2437
DYNC2H1	1.14507e-45	0.205294	0.540063
NFE2L2	1.18535e-45	-0.221213	-0.825646
MEST	1.35407e-45	0.365181	0.538013
POLR2M	1.42808e-45	0.14307	0.199714
IMPA2	1.47382e-45	-0.213777	-1.08871
SEPT11	1.71235e-45	0.189835	0.268752
UQCR10	1.93533e-45	-0.137508	-0.227581
PCDH18	2.06378e-45	0.175378	0.707771
DNAJC3	2.08271e-45	0.195248	0.388335
STRAP	2.19424e-45	0.144357	0.197465
FZD4	2.25438e-45	-0.274529	-2.00271
DNAJC9	2.43432e-45	0.148966	0.20395
UCHL1	2.44241e-45	0.268291	0.509489
SYT6	2.52408e-45	0.0412819	1.3516
GM10036	3.63693e-45	0.175298	0.2614
CDH2	4.47052e-45	0.365151	0.496877
RRM2	4.83126e-45	0.188103	0.255391
TGFB2	4.86256e-45	-0.554137	-2.69414
PKIG	4.97579e-45	0.174734	0.288183
RPL9	4.98413e-45	0.0737177	0.107582
GSTT2	5.41528e-45	-0.205874	-1.23069
ZWINT	5.55345e-45	0.177786	0.276316
H2-K1	6.17548e-45	0.261095	0.48424
CENPW	6.44981e-45	-0.16087	-0.339474
GCAT	9.34198e-45	-0.207491	-0.575193
GJB3	9.46581e-45	-0.417562	-3.42305
LRRC8B	1.0075e-44	0.099042	0.887915
SOCS3	1.2811e-44	0.0498477	1.24614
DNAJA2	1.39796e-44	0.152299	0.185753
FAM64A	1.84094e-44	0.225887	0.397093
ATP8A1	1.85519e-44	0.0771717	0.976249
DMBX1	1.94606e-44	-0.378257	-3.15718
SCRN1	2.00424e-44	0.0749179	1.00095
FHOD3	2.22996e-44	0.144915	0.754475
COL9A3	2.24464e-44	-0.219584	-1.69694
MATR3	2.36555e-44	0.156133	0.200035
NDUFC1	2.51041e-44	-0.143736	-0.253852
NME1	2.69922e-44	0.110299	0.141464
LRIG3	3.095e-44	-0.226385	-0.847164
SRP14	4.53652e-44	0.131013	0.184356
NUDT19	5.17987e-44	0.206162	0.44023
MARCH5	5.31544e-44	0.155164	0.233437
VANGL1	7.53062e-44	-0.260952	-1.56467
TEX264	8.02744e-44	-0.190048	-1.17987
PSAP	1.11986e-43	-0.201464	-0.605443
PIR	1.49906e-43	-0.201089	-0.897073
NRP2	1.62555e-43	0.228643	0.647178
GNPNAT1	1.65239e-43	-0.203872	-0.665448
FBN2	1.92488e-43	-0.198611	-0.786901
NEGR1	2.18976e-43	0.063809	1.11157
CNTFR	2.68129e-43	0.23917	0.448645
HPN	2.68129e-43	-0.378622	-3.94013
SMOC1	3.06966e-43	-0.246676	-1.54323
SORBS2	3.8551e-43	0.147946	0.751429
LGI2	4.76793e-43	-0.220389	-1.01543
ITGB5	4.92332e-43	-0.225814	-1.04483
RBM24	5.74949e-43	-0.230529	-1.45014
WNT7B	6.12463e-43	-0.535699	-4.19913
MYL6	6.27339e-43	-0.116138	-0.174868
PFN1	6.43956e-43	0.106496	0.146085
SLC30A10	8.03803e-43	0.00867137	2.4188
CAR14	8.09595e-43	0.263488	0.479665
PAFAH1B2	8.14074e-43	0.179089	0.295268
FOXB1	9.04334e-43	0.320146	0.607045
COL9A2	9.0783e-43	-0.279805	-2.7556
MAP2	9.82724e-43	-0.249368	-1.37175
GM26669	1.33588e-42	0.092384	0.917737
ATPIF1	1.3867e-42	-0.130919	-0.206078
LCORL	1.51792e-42	0.170196	0.597022
USP25	1.53275e-42	0.16913	0.54624
WNT8B	1.60515e-42	-0.650196	-3.3429
NDNL2	1.61289e-42	0.193496	0.336456
GLIPR2	1.83153e-42	-0.222716	-1.48355
CNKSR2	1.8558e-42	-0.21309	-1.44724
MLLT10	1.98664e-42	-0.183013	-0.480759
SOX11	2.07024e-42	0.189015	0.240414
TMEM256	2.43819e-42	-0.170469	-0.364494
FBXO2	3.77827e-42	-0.226759	-2.22511
TOR2A	4.06402e-42	0.164554	0.468351
EI24	4.17557e-42	0.192988	0.373079
KRIT1	4.61686e-42	0.186767	0.356644
SLC16A13	5.17746e-42	-0.202658	-1.06529
SMIM14	5.50446e-42	-0.213258	-0.669971
HCFC1R1	5.50799e-42	-0.20566	-0.716119
COCH	5.87349e-42	-0.237909	-2.03394
ADGRL3	5.91667e-42	0.127735	0.748943
PTX3	6.46181e-42	0.0133664	2.45939
RTN3	7.92535e-42	0.154497	0.200638
UBE2N	8.561e-42	0.129174	0.177859
SELENOP	8.61754e-42	-0.283978	-1.88549
ATP5A1	1.22151e-41	-0.129951	-0.232931
CAR4	1.27821e-41	-0.280229	-0.694755
MID1	1.37584e-41	0.232349	0.496303
AHCYL1	1.42076e-41	0.191011	0.362926
UBE2D3	1.52448e-41	0.125438	0.16583
UBE3A	1.54422e-41	0.156921	0.218105
BTBD3	2.46346e-41	0.115786	0.652759
ITGB8	2.52424e-41	0.0861279	0.912744
DOK5	2.75929e-41	0.0585362	1.08787
FOXP4	3.42692e-41	0.165182	0.57436
DCBLD1	4.00309e-41	-0.190301	-0.919799
CRMP1	4.43358e-41	-0.197109	-0.583702
KRTCAP2	4.62834e-41	-0.131873	-0.234991
GNB4	4.96278e-41	-0.211284	-0.843701
TUNAR	5.07061e-41	-0.199691	-1.26439
TGIF1	5.47475e-41	-0.202788	-0.520182
GM16286	6.22146e-41	0.149146	0.222731
DMTN	6.30125e-41	0.0113229	2.02246
TRIM71	6.31738e-41	0.165356	0.236125
TCEB2	6.83251e-41	-0.0977723	-0.147551
EWSR1	6.86269e-41	0.150447	0.209407
CLDN3	7.13072e-41	-0.313548	-3.19813
BAX	7.82023e-41	-0.119111	-0.20708
CASP6	8.08533e-41	-0.195214	-0.821104
SEZ6	8.08604e-41	-0.239992	-2.49198
BCL11A	8.89328e-41	-0.284411	-3.39248
EFEMP2	1.26196e-40	-0.197401	-1.59614
ARF1	1.4759e-40	0.124934	0.168182
DDAH2	1.50473e-40	-0.179669	-0.400626
CDC26	1.98781e-40	0.143947	0.218345
SHF	2.4342e-40	0.143953	0.620564
ADPRH	2.65244e-40	0.216369	0.391911
SOD1	2.67342e-40	-0.187167	-0.489091
CRYBA1	2.85328e-40	-0.273787	-2.82469
HDAC9	3.17905e-40	0.0208793	1.64337
RP23-145I16-5	3.40794e-40	-0.620169
IDI1	3.84615e-40	0.233767	0.44388
PHF14	4.36932e-40	0.153723	0.22173
KCNA1	4.57076e-40	-0.57946	-4.33232
ZCRB1	4.73623e-40	0.176345	0.280323
BSPRY	5.35877e-40	-0.328751	-3.77072
CASC4	6.70361e-40	0.184104	0.493294
ZBTB12	6.72158e-40	0.16679	0.267764
PTPN6	7.2961e-40	-0.193306	-1.31981
CMPK1	7.75781e-40	0.167541	0.278392
TUBA1C	9.04623e-40	-0.219542	-0.585142
ARL1	1.01558e-39	0.148621	0.227044
X5930412G12RIK	1.32907e-39	0.0533642
ATP6V1G1	1.35085e-39	0.126663	0.183645
LMO7	1.3962e-39	-0.201725	-2.00777
INSIG1	1.5951e-39	0.0885757	0.806708
FAM172A	2.72459e-39	0.134227	0.642773
PSMA5	3.66308e-39	0.125952	0.177848
PRTG	3.71454e-39	0.217374	0.305463
APBB1	3.79638e-39	-0.199855	-0.676555
TBCA	4.50246e-39	-0.134714	-0.233357
RIPK4	5.06962e-39	-0.202204	-2.03821
TIPIN	5.1387e-39	0.16202	0.253371
EIF4E	5.54398e-39	0.135486	0.174821
TMEM128	5.64607e-39	0.203471	0.369313
FAH	5.94679e-39	-0.182876	-1.59012
ID4	6.24187e-39	0.0374266	1.3012
HSD11B2	6.33682e-39	-0.276206	-1.1245
RPL28	6.68688e-39	-0.0692456	-0.100038
FMN2	7.09763e-39	0.089845	0.852918
ARF4	7.37542e-39	0.155427	0.226073
A830018L16RIK	7.95066e-39	-0.224257	-1.32603
CACYBP	8.07876e-39	0.124653	0.171939
DRAP1	8.53747e-39	0.140585	0.201593
PHC2	8.82967e-39	0.181391	0.34109
EMID1	9.93915e-39	0.0923915	0.796633
FGFR3	1.04823e-38	-0.213334	-1.99991
PYCARD	1.40477e-38	-0.208902	-0.924929
SMARCE1	1.5259e-38	0.134477	0.182165
HSD17B11	1.57868e-38	-0.193996	-1.66364
CKAP4	1.82761e-38	0.20415	0.349644
X2700033N17RIK	1.93113e-38	-0.199927
UNC50	2.16491e-38	0.177851	0.335662
ACOT1	2.27898e-38	0.157736	0.541352
ELOVL2	2.6615e-38	0.114968	0.745057
MYL9	2.97597e-38	-0.194082	-1.08857
DYNLL2	3.22904e-38	0.160762	0.24796
BCL2L11	3.42371e-38	0.194238	0.476641
CHN2	3.9885e-38	-0.200529	-1.45116
AK4	4.40365e-38	0.185181	0.418342
RHOBTB3	5.96381e-38	0.195336	0.327055
ERBIN	7.53775e-38	0.149195	0.618136
PLP2	9.01646e-38	-0.176024	-0.520624
SCOC	9.08898e-38	0.171847	0.302757
FOXA2	1.03982e-37	-0.496364	-2.16315
EIF3E	1.24222e-37	0.114717	0.161075
ZFP710	1.36557e-37	0.176848	0.527276
KIRREL	1.47081e-37	0.121414	0.700892
WDR86	1.96722e-37	-0.193882	-0.728483
CYP51	2.16216e-37	0.178257	0.519893
CDC42SE2	2.5609e-37	0.183005	0.380399
GATSL2	2.83688e-37	-0.196353	-0.946146
A730049H05RIK	2.97226e-37	0.0519931	1.07271
MIR17HG	4.06613e-37	0.22973	0.442936
MAP4K4	4.17846e-37	-0.178582	-0.37798
PRKAR2B	4.88811e-37	0.215699	0.499963
WNT1	5.57856e-37	-0.401596	-1.85493
BCAS2	6.61982e-37	0.121921	0.162022
TMEM98	6.71698e-37	-0.186221	-1.44413
UQCRQ	6.88395e-37	-0.129217	-0.235725
SMARCC1	7.35714e-37	0.14308	0.15629
SRGAP1	7.99379e-37	0.0856072	0.804147
MT-ATP8	8.13612e-37	-0.174096	-0.404891
BCR	9.29666e-37	0.118971	0.528374
X5330434G04RIK	1.03171e-36	0.148374
GTF2IRD1	1.09919e-36	-0.190746	-0.57361
KLF5	1.23629e-36	-0.34407	-3.7841
ZMYND8	1.40499e-36	-0.185826	-0.405284
IGFBP4	1.50341e-36	0.209542	0.433067
LMO3	1.51455e-36	0.0770212	0.820614
X1500009L16RIK	1.5929e-36	-0.171761
X3632451O06RIK	1.95668e-36	-0.207413
SLC44A5	2.01264e-36	0.0350293	1.24077
PDZPH1	2.28521e-36	0.147424	0.628859
CHCHD4	2.29974e-36	0.17533	0.302915
RASA3	2.43599e-36	0.0589101	0.961153
HOXB4	2.48446e-36		-25.7775
MPZL2	2.61967e-36	-0.310731	-3.73897
PDZD4	2.69569e-36	-0.201599	-0.700013
TIMP1	2.78791e-36	-0.156954	-1.09043
FERMT2	3.1655e-36	-0.162833	-0.432042
QK	3.76817e-36	0.170501	0.222844
PKNOX1	3.9239e-36	-0.170466	-1.09973
FAM162A	4.07562e-36	0.126869	0.174474
EPOR	4.09287e-36	-0.20114	-2.15718
MCTS1	4.40095e-36	0.164566	0.293503
CCDC90B	4.77356e-36	0.164329	0.34955
RAMP2	5.00658e-36	-0.224936	-0.693419
MAST4	6.55944e-36	0.189365	0.39646
PRICKLE1	6.97263e-36	-0.226554	-2.22229
LTBP1	7.24088e-36	-0.201593	-0.940136
PPM1L	7.33841e-36	0.122635	0.669483
NRGN	7.41554e-36	-0.205831	-1.94336
ACOT13	7.49254e-36	-0.193593	-0.613447
KCTD6	8.3836e-36	0.088075	0.762584
GM45340	8.58792e-36	-0.275457	-2.82437
CACNA2D1	9.74443e-36	-0.265026	-3.19742
POU6F2	1.08396e-35	0.0312576	1.27574
GOLGA7	1.1041e-35	0.154471	0.271902
BCCIP	1.47542e-35	0.154377	0.235577
TRP53	1.54262e-35	0.138848	0.180418
CNN1	1.57038e-35	-0.235697	-2.6696
ZFAND5	1.83933e-35	0.166912	0.260923
ETFB	2.18106e-35	0.178655	0.30525
DCUN1D1	2.23267e-35	0.192512	0.36808
BAG3	2.31222e-35	-0.170552	-1.37088
TFE3	2.56329e-35	-0.195281	-0.721773
X2410080I02RIK	2.64799e-35	-0.106941
TSPAN3	2.71166e-35	0.142687	0.184929
TMEM33	2.92552e-35	0.167079	0.314535
CCDC34	3.07164e-35	-0.138405	-0.301286
SNAI1	3.19919e-35	-0.194002	-2.04793
GPM6A	3.42743e-35	0.0149478	1.82624
RAB12	3.52604e-35	0.173592	0.465888
LPAR6	3.75079e-35	0.213249	0.51483
DTX1	3.95544e-35	-0.206345	-2.22672
GM27032	4.64873e-35	0.102497	0.785993
FAM167A	5.56575e-35	0.0251736	1.39679
CNTN2	5.63505e-35	-0.324705	-3.77067
RPL34	6.46504e-35	-0.0722807	-0.102175
FAM84A	8.05277e-35	0.0350153	1.20793
KDELR2	8.31385e-35	0.165099	0.279752
GDPD2	8.33662e-35	0.0452196	1.07732
BCAT2	8.68303e-35	-0.184753	-0.612215
DES	9.6056e-35	-0.168598	-1.32431
VSTM2L	9.75221e-35	-0.206399	-2.42221
ILF2	1.02427e-34	0.121146	0.153229
GDF10	1.03331e-34	0.0859636	0.973217
RPS4X	1.07129e-34	0.0728134	0.110402
TRMT10C	1.08185e-34	0.181123	0.354706
ITM2B	1.15273e-34	-0.176994	-0.479405
ARHGAP10	1.3382e-34	-0.186453	-0.827355
RPL13-PS3	2.00693e-34	0.134962	0.189862
BATF3	2.30555e-34	-0.183923	-1.73168
RPS9	2.70229e-34	-0.0796553	-0.116871
CDK5RAP3	2.99613e-34	0.150809	0.27657
IFI30	3.78263e-34	-0.184357	-0.653436
NR2E1	3.82462e-34	-0.685765	-6.15959
CNPY2	4.2267e-34	-0.138891	-0.30466
WIPF3	4.27869e-34	-0.166781	-1.28979
PEX13	4.49489e-34	0.173255	0.395986
CLIC1	4.73466e-34	-0.152766	-0.326431
ZMYND11	5.3372e-34	0.188285	0.342923
PDZRN3	5.60217e-34	-0.200543	-1.08256
GPBP1	5.74053e-34	0.161371	0.257905
SERPINE2	6.43055e-34	0.115263	0.514631
SNAP47	6.59329e-34	-0.17445	-0.515272
HOXA3	7.26124e-34	-0.440326	-4.56662
SLCO5A1	8.51298e-34	0.0770983	0.755415
C1QL1	8.86927e-34	-0.199789	-0.784586
NUMA1	9.80309e-34	-0.205455	-0.603827
ABCC4	1.09424e-33	0.0505116	0.970336
CPN1	1.33135e-33	-0.292613	-2.97786
BST2	1.39721e-33	-0.196094	-0.695313
MRPS36	1.41794e-33	-0.126832	-0.263681
X1810037I17RIK	1.84791e-33	-0.150814
AI314180	1.90118e-33	0.169465	0.350108
GPX7	1.90259e-33	-0.180331	-0.757018
HAP1	2.05182e-33	0.0650389	0.917417
FRZB	2.12879e-33	-0.18682	-1.04849
FSCN1	2.14675e-33	0.126662	0.168886
GPD2	2.18974e-33	-0.19244	-0.622667
X5730596B20RIK	2.25506e-33
NEDD4	2.50641e-33	0.124045	0.152843
SLC6A13	2.5683e-33	-0.348659	-4.18845
CYBA	2.85436e-33	-0.179066	-0.497364
FIGN	3.1853e-33	0.225241	0.468561
IER5L	3.42946e-33	0.209654	0.42028
LRP4	3.46071e-33	0.0913963	0.732787
NKTR	3.60926e-33	0.161595	0.250062
ZDBF2	3.72375e-33	0.190125	0.448559
RPS6KA3	3.72858e-33	0.130865	0.555075
CCDC50	3.76915e-33	0.162389	0.261873
DOCK1	4.49018e-33	0.147709	0.441127
GATM	4.60061e-33	0.0959971	0.714701
TIAM1	4.65098e-33	0.135061	0.548537
SEPT3	5.71934e-33	0.200407	0.453077
GM30340	5.89117e-33	0.0183449	1.66499
ARHGEF15	6.46259e-33	-0.184677	-2.00295
COX8A	7.39024e-33	-0.0983505	-0.155274
MEGF9	7.42901e-33	0.0534366	0.932106
NDUFA4L2	7.67527e-33	-0.174589	-0.942384
ADGRB3	7.98163e-33	0.0451521	1.08221
ACP5	8.39435e-33	-0.217391	-2.63836
LYRM9	9.50603e-33	0.104081	0.65242
DMRTA1	9.51598e-33	-0.463608	-4.3237
ANXA5	1.01005e-32	-0.166402	-1.09289
LSP1	1.18807e-32	0.0300491	1.37117
POLR2I	1.19144e-32	-0.131655	-0.267591
HERC1	1.19648e-32	0.166865	0.385902
PPL	1.47118e-32		-25.0076
SQLE	1.60601e-32	0.167763	0.393227
EIF4E3	2.01959e-32	-0.160535	-1.04617
ANXA2	2.16921e-32	-0.168289	-1.2401
PLA2G7	2.19973e-32	-0.195158	-0.760223
VCAN	2.39581e-32	0.214138	0.530856
EZH2	2.46064e-32	0.114367	0.140941
POLR2H	2.69707e-32	0.123599	0.157402
HN1	2.82967e-32	0.14737	0.18478
HAX1	3.0728e-32	-0.149194	-0.383124
GAS2L3	3.09947e-32	0.113253	0.621645
RHBDL3	3.20043e-32	-0.264301	-3.36071
MAFB	3.25311e-32	-0.418712	-2.2718
GPR162	3.62263e-32	-0.162252	-1.17968
XPOT	3.77696e-32	0.183817	0.375532
MED30	3.79395e-32	0.179561	0.298178
HMGA1-RS1	4.10674e-32	-0.178202	-0.467432
MS4A4D	4.12288e-32	-0.185157	-1.97872
MINPP1	4.24554e-32	0.167519	0.321211
RBM15	4.27374e-32	0.171227	0.424602
CADM4	4.3281e-32	0.0433858	1.10609
MAFG	4.43971e-32	0.18492	0.359334
HP1BP3	4.73573e-32	0.167672	0.386476
CUL1	4.89803e-32	0.134921	0.174004
COLEC12	5.17149e-32	-0.188092	-0.75789
NDUFA13	5.54435e-32	-0.116179	-0.222349
SCUBE2	6.03132e-32	0.0943323	0.638721
SEC14L1	6.06264e-32	0.130054	0.424741
ARID3C	6.10032e-32	-0.273141	-3.41725
EPHX2	7.67173e-32	-0.199515	-1.91346
KITL	8.86521e-32	0.0562244	0.970531
PJA2	9.79784e-32	0.169445	0.459312
TFAP2A	1.03278e-31	-0.25053	-1.8388
BCAP29	1.09322e-31	0.110486	0.63922
GM11627	1.14798e-31	-0.175124	-0.867573
ANXA6	1.18121e-31	-0.157809	-1.45415
PNISR	1.26374e-31	0.148268	0.19356
FGF3	1.26804e-31	0.0897094	0.762892
YAF2	1.31691e-31	0.198483	0.349018
FUBP1	1.32626e-31	0.10402	0.125169
TUBA1A	1.32882e-31	0.157965	0.215019
N4BP2	1.43989e-31	0.18786	0.355865
TDRD7	1.45086e-31	-0.172327	-1.31124
LRRN2	1.54561e-31	-0.192151	-2.25577
UBN2	1.60674e-31	0.150172	0.234607
FLNB	1.64646e-31	-0.177044	-0.914242
ZIC5	1.831e-31	-0.0381073	-0.227937
TMUB1	2.11242e-31	0.0894468	0.659789
CFC1	2.45971e-31	-0.441444	-4.12259
NKX2-9	2.75721e-31	-0.374749	-1.60108
RPL3	2.77098e-31	0.0649923	0.0894752
SRSF6	2.82548e-31	0.115657	0.149603
MFSD14A	2.97228e-31	0.171704	0.409896
TAGLN2	3.04514e-31	-0.193937	-0.475182
MAGEL2	3.51836e-31	0.0795848	0.821707
ATOX1	3.79323e-31	-0.122107	-0.223697
AIG1	3.8201e-31	0.158419	0.396893
MYH14	3.911e-31	-0.158919	-1.94404
MGST1	3.91979e-31	0.142071	0.474535
SMIM1	4.0262e-31	-0.159315	-1.07807
GM6792	4.16323e-31		-24.9539
UBR7	4.53637e-31	0.156861	0.321352
SLC25A36	5.36949e-31	0.159083	0.429996
GOLIM4	5.57917e-31	0.182537	0.381324
CRLS1	5.85304e-31	0.168482	0.347275
CD164L2	5.96094e-31	-0.268314	-3.80551
GM266	6.15051e-31	0.0627089	0.924736
FCOR	6.31187e-31	-0.16645	-0.772984
RFC4	6.41449e-31	0.135837	0.202573
KIF3A	6.48169e-31	0.150118	0.385683
SPATS2L	7.10688e-31	0.0737165	0.789535
HELLS	7.71701e-31	-0.166547	-0.316631
GSC2	7.80448e-31	-0.340458	-3.92318
ST14	8.15888e-31	-0.302061	-3.45641
SLC39A3	9.34624e-31	0.0332089	1.13027
PLEKHA8	9.81876e-31	0.157545	0.362904
TMEM37	9.81876e-31	-0.173775	-1.29934
HSPG2	1.01819e-30	-0.15385	-1.27572
DYNC1LI2	1.17347e-30	0.146619	0.41232
LAMA5	1.22894e-30	-0.168085	-0.920262
FOXO1	1.28333e-30	-0.16555	-1.16825
GFRA3	1.3751e-30	-0.489426	-4.62647
C1QTNF4	1.53822e-30	-0.153259	-1.16578
WDR76	1.5789e-30	0.169467	0.330314
TAB2	1.72454e-30	0.178856	0.342618
EIF3K	1.78286e-30	-0.101603	-0.160031
PAIP2	1.82203e-30	0.105839	0.138775
X4933434E20RIK	1.88116e-30	0.170472
ACADS	2.07671e-30	-0.16932	-0.574224
RBMXL1	2.09172e-30	0.111829	0.148794
SFPQ	2.21551e-30	0.121373	0.137367
TMPO	2.32011e-30	0.118757	0.131956
CAMK2N1	2.34176e-30	-0.168872	-1.43866
VAMP3	2.35485e-30	0.153268	0.266188
SNX15	2.48431e-30	-0.150202	-0.804418
CNBP	2.56058e-30	0.105556	0.132699
PI4K2B	2.59663e-30	-0.166185	-0.618998
CERCAM	3.43281e-30	0.0558597	0.899644
BEX2	3.43891e-30	0.135896	0.198773
FKBP8	3.48051e-30	-0.134923	-0.328479
DQX1	3.96108e-30	-0.253559	-0.983593
PGK1-RS7	4.15449e-30	0.10904	0.609541
RPL18	4.22946e-30	-0.0615401	-0.0854485
GAL	4.3196e-30	-0.32134	-3.07007
RARB	4.43777e-30	-0.195044	-1.91402
LDHC	4.69919e-30	-0.168572	-2.12826
CBS	4.83305e-30	-0.15218	-1.18926
ETL4	4.8376e-30	-0.177023	-0.874307
NCS1	5.31912e-30	0.11526	0.506571
PRDX1	5.42207e-30	-0.0785084	-0.117596
LARGE2	5.733e-30	0.135614	0.555706
PBK	5.81546e-30	0.162651	0.352664
SMARCA1	6.02352e-30	-0.177303	-0.589417
CPE	6.17239e-30	-0.178838	-0.513054
PLAC8	6.6846e-30	-0.156544	-1.28507
ACAT1	6.98316e-30	0.100772	0.603279
PKIA	7.33608e-30	0.104183	0.599061
X2700038G22RIK	7.98419e-30	0.172231
AKR7A5	8.16526e-30	0.152228	0.261016
ETFA	8.60693e-30	-0.175851	-0.569608
TACC2	8.64816e-30	0.166858	0.38302
SEPT9	8.80938e-30	0.180551	0.343445
FAM178A	9.81414e-30	0.162969	0.356036
CTBP1	9.82037e-30	0.124827	0.161842
RCBTB1	9.88328e-30	0.164828	0.370631
GIPC1	1.01414e-29	0.177897	0.32216
BCAM	1.01798e-29	-0.157975	-0.792718
CPNE4	1.0766e-29	-0.206982	-2.99434
TBL1XR1	1.15219e-29	0.159354	0.419319
HRAS	1.15541e-29	-0.121107	-0.269212
RHOF	1.21777e-29	-0.171592	-2.26636
H3F3A	1.2616e-29	0.0776953	0.109336
SEC22A	1.29469e-29	0.145956	0.420401
RPL5	1.30705e-29	0.0769205	0.102104
LAMB1	1.31301e-29	-0.178359	-0.688596
SIPA1L1	1.33659e-29	0.150828	0.353244
BCL2	1.38094e-29	0.0894312	0.69812
SMPD3	1.42518e-29	0.0410155	1.02474
FAM122A	1.66784e-29	0.132249	0.38232
BDNF	1.80394e-29	0.0611931	0.843425
USMG5	1.80938e-29	-0.117664	-0.215019
PRKRA	1.82857e-29	0.156396	0.265769
SRP9	1.87697e-29	0.128599	0.195874
BNIP3	1.91063e-29	0.176696	0.285874
COL11A1	1.93249e-29	0.0561203	0.870705
TRPS1	1.93593e-29	0.0697501	0.798643
WNT4	1.98976e-29	0.0726622	0.846575
HNRNPL	2.09095e-29	0.136329	0.175679
TSHZ1	2.35497e-29	-0.148503	-0.969462
LHPP	2.38114e-29	-0.17942	-0.653869
TCF3	2.45685e-29	0.133398	0.190387
DLX5	2.4653e-29	-0.249646	-2.63473
GPHN	2.71551e-29	0.110414	0.549321
GM9847	2.76666e-29	-0.168039	-1.011
DCUN1D5	2.90256e-29	0.125887	0.181299
PRKRIR	2.90395e-29	0.167531	0.301007
D8ERTD738E	3.09043e-29	-0.10456	-0.190658
AP1S3	3.14451e-29	-0.154857	-1.36754
DUSP16	3.56111e-29	0.0600049	0.801833
CDK17	3.63658e-29	0.105592	0.605056
CNN2	3.86666e-29	-0.159485	-0.94024
PTP4A1	4.0086e-29	0.147964	0.237191
PPP1CA	4.14067e-29	-0.0931419	-0.186527
PAK3	4.14067e-29	-0.187992	-0.909667
ZNRF3	4.3213e-29	0.0848956	0.680162
ACACA	4.50153e-29	0.147434	0.36242
GADD45A	4.84886e-29	-0.217263	-0.872662
ENO1	4.86681e-29	-0.11239	-0.176185
LSM7	5.21161e-29	-0.152503	-0.350179
GABARAPL2	5.23698e-29	0.137234	0.226994
MFSD2A	5.29551e-29	0.0314713	1.22162
CDH20	5.78277e-29	0.0486539	0.98804
PLPPR1	6.3674e-29	-0.167684	-1.38666
RARA	7.35821e-29	-0.162747	-0.771362
RPL14	8.20485e-29	-0.0594924	-0.0867362
NFKBIA	8.20934e-29	-0.175054	-0.718005
FIS1	9.46898e-29	-0.118104	-0.244676
ERO1L	9.80748e-29	0.158532	0.446724
IMMP1L	1.00899e-28	-0.134313	-0.345692
KLHL9	1.16098e-28	0.142446	0.290878
FOXG1	1.18798e-28	-0.349997	-2.81778
WRB	1.41075e-28	0.157972	0.337546
ARSI	1.4624e-28	-0.231954	-3.18912
GNG13	1.48681e-28	-0.167157	-2.06567
SHTN1	1.51058e-28	-0.19269	-2.00118
KIF15	1.75605e-28	0.151437	0.231594
MRPL33	1.78297e-28	-0.122481	-0.288029
NDUFB9	1.78398e-28	-0.104665	-0.213063
CALM1	1.96402e-28	-0.0897499	-0.140145
PLCXD1	2.22618e-28	-0.141214	-1.71385
PRNP	2.2445e-28	0.0533058	0.774224
ABCE1	2.39818e-28	0.136679	0.1892
COL4A1	2.41655e-28	-0.160692	-0.520222
AP3M2	2.5054e-28	0.0417191	1.02811
DLGAP3	2.59785e-28	-0.161734	-1.95968
RPS6	2.65401e-28	0.0684182	0.0930012
ARL3	2.6665e-28	0.1306	0.201722
DDX18	2.78827e-28	-0.122601	-0.258824
PRDX3	2.79439e-28	0.175941	0.356646
TROVE2	3.05973e-28	0.172331	0.427976
PGAM1	3.23998e-28	0.0677033	0.0961572
UNC5C	3.4658e-28	0.0305042	1.29122
CPSF6	3.47487e-28	0.13488	0.161607
ZC3H14	3.50759e-28	0.135895	0.218366
RPS14	3.53286e-28	-0.0529467	-0.0759511
HTRA2	3.59248e-28	0.152745	0.381565
EPHA1	3.6949e-28	-0.183822	-1.56318
ALG6	3.8094e-28	0.109859	0.554953
HACD2	3.92257e-28	0.161805	0.334051
ABHD8	4.05295e-28	0.131839	0.455121
CCDC82	4.59447e-28	0.0656901	0.779157
NTNG1	5.57678e-28	-0.20799	-2.14708
PUF60	6.32096e-28	0.145848	0.222823
HIST1H2AE	6.32096e-28	-0.259748	-0.475678
RAB10	6.95062e-28	0.134436	0.204183
ATP2B4	7.31057e-28	-0.173441	-1.80044
PTH2R	7.64905e-28	0.00594031	2.39603
ARL4C	8.1843e-28	-0.174392	-0.437068
F2RL1	8.72319e-28		-24.5782
SMAD5	8.75647e-28	0.119874	0.440283
NIP7	8.99368e-28	0.13065	0.197149
TRIM54	9.17006e-28	-0.14254	-1.33537
SLITRK1	9.3007e-28	0.00840684	2.08507
TALDO1	9.94104e-28	-0.105037	-0.189711
AURKAIP1	1.01725e-27	-0.125574	-0.281032
PPP4C	1.07071e-27	0.136659	0.205533
ANAPC13	1.08895e-27	-0.128437	-0.295446
DDAH1	1.12221e-27	-0.165717	-0.462351
PDLIM4	1.14796e-27	0.128416	0.588235
DNMT1	1.16202e-27	0.144652	0.208159
SCAF11	1.24174e-27	0.133241	0.171326
CEP55	1.37224e-27	0.110994	0.525633
ADGRG1	1.42483e-27	0.0481576	0.92646
LGI1	1.66132e-27	0.0271413	1.40635
PCK2	1.69701e-27	-0.151541	-0.75772
TNK1	1.87506e-27	-0.204816	-3.2037
NUDT21	2.05713e-27	0.0999138	0.119363
HOXB3	2.07883e-27	-0.670952	-6.10388
RSL1D1	2.4864e-27	0.10691	0.134261
ARHGAP29	2.59071e-27	0.170514	0.474602
NDUFA11	2.62267e-27	-0.110629	-0.212929
AZIN1	2.6611e-27	0.157799	0.27669
RPS15	2.77422e-27	-0.0629807	-0.0928169
B830012L14RIK	3.21384e-27	-0.150623	-1.13454
LRFN4	3.25657e-27	-0.155167	-0.746125
ARHGDIG	3.26416e-27	-0.160261	-0.621388
ZFP532	3.51591e-27	0.154149	0.346343
EEF1A1	3.63778e-27	0.0912979	0.121399
MYH9	3.81704e-27	-0.178391	-0.45378
TUBE1	3.83181e-27	0.103201	0.509536
TEX15	3.85628e-27	-0.17002	-1.2214
MAPK8IP2	3.8758e-27	-0.149752	-0.792768
GOLGB1	3.91606e-27	-0.166114	-0.424555
ATP6V0E	3.98815e-27	-0.126102	-0.294422
PPP2R3A	4.40531e-27	0.117888	0.519069
CD276	4.42941e-27	-0.161774	-0.635983
EGFR	4.43384e-27	0.0147158	1.51348
TAF13	4.59933e-27	0.137731	0.323847
PHPT1	4.61858e-27	0.153172	0.33082
TULP4	4.6663e-27	0.149205	0.340663
MMP16	4.70538e-27	0.0749629	0.662285
GSTT1	4.79764e-27	-0.140787	-1.44933
CAMTA1	4.93448e-27	0.153776	0.284446
HIST1H4H	5.00922e-27	-0.17788	-0.79929
CASP8AP2	5.03634e-27	0.155054	0.238966
CHMP4C	5.06462e-27	-0.150041	-1.94405
CAR2	5.34714e-27	-0.191117	-0.733632
AGPAT5	5.53096e-27	0.143789	0.264589
X2200002D01RIK	5.58309e-27	-0.139982
EPB41L4AOS	5.82369e-27	-0.141164	-0.338924
PGM1	5.82681e-27	0.112951	0.515012
MSANTD3	5.95751e-27	0.150807	0.291033
SCUBE1	6.17261e-27	-0.0598393	-0.459998
TNFAIP1	6.51198e-27	0.153658	0.331532
FAM117B	6.95373e-27	0.123005	0.470475
DARS	6.98457e-27	0.139752	0.219572
KCNB1	7.34914e-27	0.0500183	0.854129
RHOA	7.36197e-27	0.0979134	0.133828
OTUB1	7.47289e-27	0.145631	0.224764
OPCML	7.53818e-27	0.0919178	0.851975
SPIRE1	7.812e-27	0.147944	0.388658
DYNC1H1	8.01787e-27	-0.186103	-0.5127
NINL	8.66405e-27	-0.155474	-0.668569
TMEM168	8.92898e-27	0.112404	0.475991
SH2D3C	9.09795e-27	0.023755	1.29952
TSPAN12	9.11065e-27	0.103433	0.568803
NAE1	9.2327e-27	0.133907	0.211878
FLNC	9.27384e-27	-0.148332	-0.954735
GSK3B	9.44024e-27	0.136717	0.198421
IGSF3	1.04921e-26	-0.153437	-0.838869
ABCA2	1.08815e-26	0.0511716	0.809678
SULT4A1	1.20748e-26	-0.146417	-0.839796
HMGCS1	1.23051e-26	0.15154	0.322755
TIPRL	1.24591e-26	0.145355	0.255722
HEBP2	1.29058e-26	-0.148457	-0.945719
GINS2	1.36435e-26	0.134022	0.203733
SNX18	1.45722e-26	0.134846	0.408038
VDAC1	1.49432e-26	0.099669	0.133411
PLA2G16	1.49432e-26	-0.157219	-0.901121
POP5	1.58687e-26	-0.13013	-0.307074
CDK18	1.5993e-26	-0.138032	-1.87382
RRBP1	1.76195e-26	-0.144361	-0.313271
OAF	1.83935e-26	-0.155151	-0.760887
USP9X	1.92142e-26	0.162802	0.281969
NRBP1	1.99373e-26	0.150212	0.271614
GM12860	2.10204e-26	0.00355968	2.88551
SEZ6L2	2.10352e-26	-0.147865	-2.02475
SYCP3	2.25396e-26	-0.219385	-2.97449
DOCK7	2.36051e-26	0.164182	0.335297
USP1	2.53305e-26	0.143876	0.218859
GAR1	2.95629e-26	0.115895	0.159138
MIER1	3.01631e-26	0.146216	0.241241
IFITM2	3.09621e-26	-0.151509	-0.260633
FKBP5	3.27871e-26	0.153776	0.387263
FAM162B	3.3943e-26	-0.218433	-2.88821
MT2	3.53502e-26	-0.154395	-1.05476
S100A1	4.01849e-26	-0.132315	-1.00289
FAM120A	4.4974e-26	0.129255	0.353945
ME1	4.77689e-26	-0.121182	-1.17361
HES1	5.14892e-26	-0.230467	-0.539854
PTBP2	5.20625e-26	0.153635	0.269099
ASS1	5.20747e-26	-0.15521	-2.2303
SLC46A1	5.21979e-26	0.0736541	0.689775
ENPP2	5.59823e-26	-0.281757	-2.35403
RPS8	5.78953e-26	-0.0516828	-0.0707737
EVA1B	6.23382e-26	-0.160957	-0.763659
CBX1	6.30282e-26	0.0878796	0.091854
CLTA	6.321e-26	0.0910698	0.117188
UPK3BL	6.5655e-26	-0.118857	-1.16152
POC1B	7.40733e-26	0.130324	0.437216
NFYB	7.66542e-26	-0.124939	-0.287697
PLAGL1	8.11399e-26	-0.180559	-1.55155
FAT1	8.12411e-26	-0.168044	-0.527591
CAR3	8.90717e-26	0.0662434	0.778313
TCEAL6	9.152e-26	-0.130035	-1.1048
TMEM218	9.92834e-26	0.11989	0.483382
HCK	1.00758e-25	-0.19943	-2.38183
TM9SF4	1.01777e-25	0.134492	0.275833
UCHL3	1.02177e-25	0.115372	0.166767
BIRC5	1.21646e-25	0.109274	0.130853
R3HDM1	1.27745e-25	0.146466	0.246046
EIF5B	1.44836e-25	-0.101198	-0.195933
GRASP	1.48058e-25	-0.148695	-0.94489
FLYWCH2	1.55891e-25	-0.153588	-0.615048
CPNE2	1.60477e-25	0.0679241	0.756748
FIGNL2	1.67448e-25	0.153204	0.341535
SLC38A4	1.73945e-25	0.0832099	0.581067
CHD9	1.77117e-25	0.146445	0.447625
TRAPPC2	1.86826e-25	0.093611	0.546267
CAMSAP3	1.90782e-25	-0.151487	-0.750567
CXX1B	1.98124e-25	-0.16562	-0.578764
FZD9	2.04175e-25	0.066968	0.74878
KDELR1	2.08041e-25	0.141837	0.249591
PLCD4	2.08041e-25	0.0234985	1.25781
RHOU	2.17213e-25	0.109198	0.461281
DHRS3	2.19919e-25	-0.210808	-2.90375
LRP8	2.37053e-25	0.0590957	0.794837
LIPG	2.51983e-25	0.0185682	1.37895
KCNK2	2.54441e-25	-0.140269	-1.4006
AGO1	2.66757e-25	0.131871	0.385883
LNPK1	2.73057e-25	0.152807	0.407708
X1700037H04RIK	2.76875e-25	0.130879
EIF2A	2.78978e-25	0.121728	0.182821
RAB11B	2.83977e-25	0.132381	0.228522
NKX2-1	2.94011e-25	-0.77094	-4.70078
MYCBP2	2.94698e-25	0.154721	0.283698
NAP1L4	3.07457e-25	0.115382	0.141845
RPL17	3.08164e-25	0.0533805	0.071036
SKAP2	3.08164e-25	-0.162601	-0.670925
ANKHD1	3.12103e-25	0.144563	0.285357
NID2	3.21508e-25	-0.136172	-1.02559
CLN5	3.23247e-25	0.0907263	0.590245
SLC7A7	3.47097e-25	-0.169517	-2.20378
LIX1L	3.62585e-25	0.0979621	0.584627
NPTN	3.7813e-25	0.149483	0.370759
BARHL2	3.87317e-25	-0.403187	-3.73143
CYSTM1	3.95512e-25	0.067488	0.528504
SEMA5B	4.17206e-25	0.0605801	0.806109
NCOA3	4.24181e-25	0.125836	0.462303
CNTNAP2	4.46095e-25	-0.189138	-0.837891
CXADR	4.55528e-25	0.156847	0.308541
NUTF2	4.59257e-25	0.143487	0.40134
TCF15	4.5958e-25	-0.15352	-1.45108
SEPT2	4.91116e-25	0.14587	0.246465
LSM2	5.08123e-25	0.0949999	0.124439
PDE10A	5.46568e-25	0.0441315	0.963309
RPS28	5.46568e-25	-0.086403	-0.124342
PSAT1	5.91306e-25	0.139849	0.222491
CCDC160	6.24455e-25	0.108973	0.501672
COX7B	6.88591e-25	-0.0915517	-0.165781
GNA14	8.22127e-25	-0.143738	-1.52134
VPS35	8.36115e-25	0.13215	0.21432
ETV2	8.52968e-25	-0.112661	-0.907187
CCNJL	9.17358e-25	0.160056	0.412588
SGK3	9.17358e-25	-0.155313	-2.35661
LMO2	9.28452e-25	-0.144775	-1.89697
EIF4A2	9.34343e-25	0.139635	0.204927
DLC1	9.40694e-25	-0.144105	-1.22846
CISD2	9.72671e-25	0.12103	0.178195
ZDHHC20	9.8077e-25	0.147199	0.382282
LONRF2	1.00244e-24	0.0274209	1.09489
GM10260	1.01895e-24	-0.120861	-0.186591
KMT2E	1.05946e-24	0.157015	0.329719
SCG3	1.17796e-24	0.0260767	1.16472
MYO5C	1.1954e-24	-0.166542	-2.20299
MSRB2	1.25335e-24	-0.123704	-1.16133
HACD4	1.27429e-24	0.0277282	1.12958
NES	1.28949e-24	0.185141	0.379972
FAM96A	1.29326e-24	0.138206	0.226943
ARHGAP42	1.36745e-24	0.0689237	0.443015
SRSF9	1.52356e-24	0.108163	0.142433
SH3D19	1.56873e-24	-0.142449	-0.779077
X1700023F06RIK	1.60389e-24	-0.126666
PCNP	1.6066e-24	0.126996	0.174362
TRP53I11	1.65662e-24	-0.169409	-0.534371
PDLIM7	1.69403e-24	-0.148934	-0.400761
ZSWIM7	1.74206e-24	-0.148363	-0.578281
ACOT8	1.818e-24	-0.141494	-0.666319
FAM107A	1.952e-24	-0.422209	-6.09108
MOB3B	1.9705e-24	0.0906589	0.573479
RPL6L	2.06363e-24	0.115675	0.17079
CRK	2.07573e-24	0.125165	0.237433
FHL1	2.15666e-24	0.176536	0.367378
RABGGTB	2.27016e-24	0.141492	0.235699
ERICH2	2.46337e-24	0.0229655	1.23713
MYB	2.46337e-24	-0.141515	-1.27819
MAP3K5	2.65232e-24	-0.123849	-1.73848
B3GALT1	2.66342e-24	0.0323008	1.02235
CCDC115	2.70413e-24	0.145037	0.290095
FAM188A	2.82436e-24	0.112639	0.307556
SPR	2.84161e-24	-0.143738	-0.387769
PPP1R18	2.96477e-24	-0.12209	-0.941463
MAP1LC3B	3.02042e-24	-0.115006	-0.253302
JAM2	3.26574e-24	0.0619815	0.757255
HIST1H2BK	3.28234e-24	0.0513648	0.795049
TFDP1	3.45068e-24	0.137527	0.213163
ARHGEF10	3.73398e-24	0.0651504	0.746609
PYGO1	3.98272e-24	0.0604237	0.764334
PPP3CA	4.02786e-24	0.148744	0.464497
PRDX6	4.06043e-24	-0.0996902	-0.196425
BMF	4.17659e-24	0.0514477	0.791499
GMPS	4.45482e-24	0.106819	0.149192
NPAS3	4.55042e-24	0.0509075	0.863788
PTH1R	4.69515e-24	-0.160453	-0.80231
KIF5A	4.72817e-24	-0.13578	-0.890175
RPS7	4.80212e-24	0.0502804	0.0724442
WWC2	4.82945e-24	-0.153322	-0.42945
CNOT7	4.94967e-24	0.146106	0.255982
GM3550	5.12984e-24	0.145592	0.362233
MYC	5.14665e-24	0.129132	0.521289
EIF3C	5.40231e-24	-0.0862481	-0.161277
TMEM258	5.45618e-24	-0.0954601	-0.165125
KDM6B	5.48684e-24	0.15828	0.333934
NTF3	5.71477e-24	-0.329481	-3.97178
MTA1	5.77535e-24	0.121419	0.165408
LRCH3	6.02889e-24	0.116097	0.421012
YBX3	6.05004e-24	0.109008	0.121562
RPL36AL	6.23754e-24	-0.0746921	-0.110817
NSG1	6.78348e-24	0.119639	0.525155
DLEU7	7.03405e-24	-0.137243	-1.55702
SNX5	7.19808e-24	0.107889	0.116146
SYNE4	7.29958e-24	-0.11437	-1.04059
HOXA5	7.40304e-24		-24.5768
X9530068E07RIK	7.42054e-24	0.15081
RPL13	7.42054e-24	-0.0584345	-0.0837453
ATXN2L	7.42858e-24	0.146289	0.256635
GM8186	7.45656e-24	-0.123616	-0.262803
FGFBP3	7.49219e-24	0.0505631	0.161277
GSE1	7.50092e-24	-0.140521	-1.18615
SLC35F2	7.55283e-24	-0.134334	-0.885439
DMRTA2	7.75671e-24	-0.177941	-1.63749
AP1M1	8.40867e-24	0.133142	0.328526
NARF	8.62182e-24	0.107282	0.425241
DBNDD1	9.06047e-24	-0.117746	-0.960786
RNF135	9.22039e-24	-0.109377	-1.85769
CACNA1G	9.56616e-24	0.0617732	0.707396
ARF6	9.68832e-24	0.152706	0.275002
ALDH9A1	1.05617e-23	-0.143429	-0.432262
REV3L	1.06545e-23	0.133319	0.425652
MCM6	1.14755e-23	0.120566	0.160795
PFDN4	1.17906e-23	0.122967	0.174189
X2700081O15RIK	1.2239e-23	0.140648
EGR2	1.25941e-23	-0.435771	-2.92547
SEC62	1.27991e-23	-0.115216	-0.264479
CHRNA4	1.39821e-23	-0.124791	-1.40259
CBFA2T3	1.41935e-23	-0.150415	-2.07945
ATP11C	1.45604e-23	0.111425	0.481116
TMEM82	1.50508e-23	-0.130346	-1.35537
RBM17	1.52511e-23	0.10618	0.138258
CNN3	1.6018e-23	0.11441	0.129677
HS6ST2	1.76045e-23	-0.143132	-0.636782
UBA2	1.8789e-23	0.108968	0.144266
WNK3	2.0444e-23	0.139435	0.374127
CYP26C1	2.17728e-23	-0.313482	-4.4013
SLC45A3	2.21499e-23	-0.114437	-1.26368
DDX5	2.34182e-23	0.0931402	0.11761
MSI1	2.35573e-23	0.155861	0.284551
PBX3	2.4238e-23	0.16532	0.283211
SLC16A11	2.77923e-23	-0.225198	-3.65152
PTGES3	2.93391e-23	0.0886062	0.104726
FAIM	2.94649e-23	0.127162	0.281486
RPL10-PS3	3.38273e-23	0.116587	0.14374
PEX5L	3.40387e-23	-0.141541	-1.14469
FAM169B	3.4289e-23	-0.240236	-3.9331
RNH1	3.46717e-23	-0.147327	-0.466226
ANK3	3.51277e-23	0.139409	0.471417
LAG3	3.53925e-23	-0.129649	-1.75285
NUDT11	4.03962e-23	0.0987842	0.51845
PCOLCE	4.29783e-23	-0.129617	-1.93054
GM20604	4.39374e-23	0.116782	0.408018
MPC1	4.68354e-23	0.0857622	0.523828
GRAMD4	4.78474e-23	0.0593035	0.726029
ROBO1	5.15488e-23	0.120456	0.444089
RPS12-PS3	5.2204e-23	0.0740785	0.0946853
ITPR3	6.37713e-23	-0.13308	-2.08501
KDM7A	6.49798e-23	0.147089	0.385279
DNAJC12	6.49798e-23	0.0840217	0.545284
SSR1	6.72792e-23	0.13659	0.225953
X9130401M01RIK	6.85629e-23	0.130633
LSM6	7.03636e-23	0.0884986	0.0872722
RPL35A	7.24636e-23	-0.0597924	-0.0895433
X2410015M20RIK	7.26109e-23	-0.0951008
FOXI2	7.41232e-23	-0.353869	-5.02289
SLK	7.50425e-23	0.153444	0.328947
KAT6A	8.16599e-23	0.150296	0.334379
CIART	8.78487e-23	0.0776436	0.562386
NECAB2	8.99831e-23	-0.148395	-0.767064
NOVA2	9.24e-23	0.0793971	0.600928
BCL9L	9.25695e-23	-0.131626	-0.828972
APOPT1	9.34459e-23	0.145476	0.258726
TMC4	9.4988e-23	-0.147548	-0.576212
RCN2	9.52371e-23	0.140987	0.229339
ANKLE1	9.96128e-23	0.0705306	0.576505
ZFP219	1.01128e-22	0.15032	0.291749
CEND1	1.04649e-22	-0.116483	-1.33187
X1700011H14RIK	1.06592e-22	-0.80059
PARD6G	1.21949e-22	0.132448	0.374481
BMT2	1.22192e-22	0.130476	0.363143
PTAR1	1.24045e-22	0.0500664	0.783993
IGF2	1.24656e-22	-0.124125	-0.780403
LDOC1	1.28861e-22	-0.175181	-2.95506
NSFL1C	1.29262e-22	0.108456	0.146893
SOS2	1.30976e-22	0.0827815	0.60376
TRIL	1.37068e-22	-0.127445	-1.18421
OLFM2	1.46248e-22	0.0324381	1.06869
SYT17	1.4672e-22	-0.132509	-2.05343
LEPROTL1	1.51489e-22	0.128365	0.263256
MCM7	1.54089e-22	0.0990802	0.107959
MOBP	1.55784e-22	-0.453619	-6.0462
PQLC3	1.56871e-22	-0.114878	-1.80695
MME	1.63847e-22	-0.111397	-1.91976
GM3716	1.66481e-22	0.0477888	0.773305
CTPS2	1.68433e-22	-0.127487	-0.832452
YBX2	1.81681e-22	-0.115522	-1.29044
FBXW4	1.82444e-22	0.0785397	0.562251
BEND5	1.87172e-22	0.116722	0.461757
SYS1	1.90961e-22	0.119924	0.200854
AFF3	1.90961e-22	0.0886784	0.548471
ZFP318	2.06433e-22	0.14387	0.307733
CYB5R3	2.23796e-22	0.122413	0.16106
KLF2	2.24903e-22	-0.13334	-1.50432
FBXL14	2.3311e-22	0.15623	0.346803
TRIM32	2.36124e-22	0.121902	0.369266
AHI1	2.43583e-22	0.149967	0.321653
NHSL1	2.43854e-22	0.0872436	0.577822
CD63	2.47236e-22	-0.133217	-0.3754
TFAP4	2.54114e-22	0.127211	0.406367
GM8797	2.62266e-22	0.144304	0.208199
ACLY	2.9024e-22	0.151138	0.257952
LZIC	2.90498e-22	0.119112	0.350676
STK38L	2.9454e-22	0.0637714	0.678232
CSRNP3	3.45351e-22	0.0459552	0.845879
PGM2L1	3.47396e-22	0.0842118	0.607154
NONO	3.48302e-22	0.0869073	0.0930624
VPS26A	3.68392e-22	0.124884	0.329947
RUNDC3A	3.75053e-22	-0.125928	-0.9522
AS3MT	3.77901e-22	-0.140218	-0.592031
TTC28	3.84155e-22	0.119313	0.504631
TIMM8B	3.9165e-22	-0.0973988	-0.188175
PTPN13	4.19728e-22	0.163363	0.283918
MFAP4	4.26598e-22	-0.123947	-0.996689
RAPGEF5	4.30269e-22	-0.12197	-1.02029
FGFBP1	4.31629e-22	-0.372641	-4.89392
DYNC2LI1	4.44894e-22	0.122702	0.384148
SPDL1	4.5347e-22	-0.139869	-0.471361
SIGMAR1	4.55361e-22	0.12881	0.202864
CHEK1	4.59029e-22	0.11373	0.22409
ATP1B3	4.74218e-22	0.126731	0.200329
PITPNA	4.83978e-22	0.113913	0.181892
CD47	4.87721e-22	0.141682	0.298363
EMP3	5.0476e-22	-0.14999	-2.42408
MSRB1	5.06703e-22	-0.145515	-0.508633
ITGAL	5.08444e-22	0.00501652	2.21825
ANKRD13B	5.09067e-22	0.0888851	0.56058
FUNDC2	5.33263e-22	0.118374	0.201934
TRAPPC4	5.39145e-22	0.104458	0.132479
KCNK1	5.9416e-22	-0.142369	-0.569438
SCN5A	6.02971e-22	-0.228524	-3.91747
STXBP2	6.07494e-22	-0.142445	-0.542629
SLC25A39	6.15705e-22	-0.12117	-0.296446
ACTN4	6.23618e-22	-0.125179	-0.322026
DGKA	6.3425e-22	-0.121005	-1.8895
CINP	6.41926e-22	0.138694	0.264077
TEX30	6.45647e-22	0.133883	0.260384
DHX9	6.59788e-22	0.131167	0.16528
CHUK	6.86983e-22	0.113356	0.370767
PTCH2	6.88603e-22	-0.107412	-1.108
ZFP800	6.91364e-22	0.130885	0.460163
DDIT4L	7.18351e-22	-0.131256	-0.865091
BDH1	7.3349e-22	-0.111377	-1.19724
TEAD1	7.50619e-22	0.146232	0.261154
RIIAD1	7.65169e-22	-0.149907	-2.73897
LASP1	7.8939e-22	-0.140336	-0.537321
STAT6	8.38941e-22	-0.106245	-1.01333
FAM81A	8.53435e-22	-0.127328	-1.95664
ADD3	8.9392e-22	0.152983	0.301232
TMEM5	9.13599e-22	0.144073	0.337894
MARVELD2	9.15952e-22	-0.142186	-2.47063
MOSPD1	9.6375e-22	0.114609	0.442584
SNAPC5	1.00041e-21	-0.125829	-0.331332
TFDP2	1.04415e-21	0.152623	0.279735
RCN1	1.05892e-21	-0.135864	-0.336007
MAP3K7CL	1.10404e-21	0.00191987	3.30497
RAP2A	1.12647e-21	0.141098	0.384669
NOA1	1.13234e-21	0.140368	0.315473
MCC	1.18586e-21	0.0434711	0.593072
TSPAN7	1.19441e-21	0.126899	0.329698
RGL3	1.2044e-21	-0.12328	-1.91472
PLOD2	1.263e-21	0.147697	0.319848
PREX2	1.2649e-21	0.0941916	0.580758
RNF152	1.303e-21	-0.144158	-1.38796
CLN8	1.31003e-21	0.0864115	0.460256
SALL2	1.3287e-21	0.184487	0.303586
LETM1	1.33113e-21	-0.140615	-0.398024
UBE2E2	1.36307e-21	0.112527	0.418309
ELAVL4	1.38656e-21	0.0431192	0.8712
DLL1	1.51976e-21	0.0681736	0.602913
RFX3	1.54265e-21	0.125826	0.451978
HHIP	1.67357e-21	-0.202264	-3.1097
SIX6	1.72987e-21	-0.307175	-2.56192
KCNJ12	1.81452e-21	-0.119439	-1.49617
ST8SIA3	1.88052e-21	-0.129037	-0.580094
CAT	1.90002e-21	0.134753	0.295942
SLC29A3	1.90482e-21	-0.187279	-3.40203
GRB2	2.03167e-21	0.121492	0.204435
TFG	2.04069e-21	0.125881	0.200062
RHOT1	2.09712e-21	0.121525	0.345804
TENM3	2.11815e-21	0.137658	0.316974
NTRK2	2.16331e-21	-0.143165	-1.21573
RPL23A	2.25574e-21	0.0829658	0.106222
RALYL	2.27171e-21	0.0154417	1.34765
NDUFA2	2.28777e-21	-0.090331	-0.165831
MTCL1	2.32419e-21	0.169038	0.346132
APOA1BP	2.33231e-21	-0.139367	-0.394644
HAGLR	2.36165e-21	-0.227296	-3.54646
PRDM8	2.36717e-21	0.00901865	1.84921
DDIT4	2.41595e-21	-0.162952	-0.381927
TIMM10	2.51446e-21	0.130291	0.209714
SMDT1	2.56208e-21	-0.092194	-0.183592
RLF	2.59317e-21	0.125892	0.258318
MFSD10	2.5967e-21	-0.137412	-0.388901
X5730409E04RIK	2.60272e-21	-0.107449
NR2F2	2.61155e-21	-0.0418513	-0.208993
SV2A	2.61227e-21	-0.116265	-1.46383
MMGT2	2.62037e-21	0.106755	0.480688
NEDD1	2.73588e-21	0.120066	0.346032
SIRT2	2.9139e-21	0.0935362	0.301749
EIF5	3.05653e-21	0.0767285	0.0936786
CBX3	3.18577e-21	0.107305	0.152062
GLRX	3.25969e-21	-0.140476	-0.528886
YWHAB	3.63543e-21	0.0900547	0.0867548
ARHGEF25	3.6665e-21	-0.132766	-0.491377
VAT1	3.73392e-21	-0.12829	-0.790365
SDC3	3.74648e-21	0.0409047	0.847577
PCYOX1L	3.75218e-21	0.115311	0.446742
ATAD1	3.91298e-21	0.14138	0.284022
HDAC2	3.91921e-21	0.110358	0.143607
RRAGC	3.94731e-21	0.0973144	0.396626
SREK1	4.02794e-21	0.115005	0.155098
PLSCR1	4.15937e-21	0.121992	0.350701
SRGAP3	4.18757e-21	0.0997552	0.520958
MAT2B	4.23622e-21	0.128374	0.230574
SMARCAD1	4.82681e-21	0.122969	0.19483
CCDC136	5.01727e-21	-0.14001	-0.459067
VPS8	5.14463e-21	0.060021	0.674237
CD9	5.27334e-21	-0.149914	-0.452721
S100A6	5.31916e-21	-0.137613	-0.581778
BOLA2	5.93286e-21	-0.103659	-0.202427
NLGN3	6.39685e-21	0.0497827	0.762339
TRIM37	7.60076e-21	0.12738	0.217111
IPO7	7.69771e-21	0.136305	0.207494
NDUFA1	7.80713e-21	0.107286	0.119814
SELENOW	8.0285e-21	-0.0992415	-0.195471
ALKBH5	8.6348e-21	0.132954	0.250948
SRSF1	9.17699e-21	0.115245	0.139183
ARHGEF16	9.88615e-21	-0.10555	-2.12993
SDCBP	1.04448e-20	0.121732	0.243224
GLOD5	1.06309e-20	-0.192774	-3.3266
UBC	1.12782e-20	0.140093	0.176415
CCDC88A	1.15095e-20	-0.145224	-0.416971
ACKR3	1.16678e-20	-0.129493	-1.15146
ADGRV1	1.2004e-20	0.10501	0.51331
SMARCC2	1.24449e-20	0.118601	0.361357
ZFP131	1.28845e-20	0.143219	0.257677
HNRNPH1	1.36265e-20	0.112765	0.126921
SERF2	1.36441e-20	-0.0614419	-0.0878438
CXXC5	1.3663e-20	0.134346	0.352829
RBBP4	1.36755e-20	0.0910775	0.111009
INF2	1.3884e-20	-0.108834	-1.1801
FAM208B	1.39605e-20	0.134687	0.284372
OLIG3	1.40753e-20	-0.172567	-1.45764
LSM14B	1.42308e-20	0.129673	0.304167
CDK2AP1	1.44374e-20	0.104268	0.132853
MRPL14	1.45598e-20	0.112671	0.170921
VAX1	1.48663e-20	-0.384709	-4.95644
PELI1	1.56144e-20	0.145049	0.266615
COQ7	1.60497e-20	-0.109315	-0.257896
USP33	1.73389e-20	0.101027	0.382688
SRSF5	1.77177e-20	0.119357	0.155342
BBX	1.82431e-20	0.147546	0.240764
AMER2	1.87725e-20	0.0815867	0.558295
X2700046A07RIK	1.90505e-20	0.0176103
ARCN1	2.05667e-20	0.135318	0.245003
SAAL1	2.05887e-20	0.123679	0.261467
SORD	2.14421e-20	-0.109905	-1.20897
SNX3	2.14878e-20	-0.100969	-0.213254
MPST	2.24096e-20	0.121578	0.266448
ZFP36L3	2.26972e-20	-0.184867	-3.14832
GPT2	2.31746e-20	0.0651419	0.54396
PSMC3IP	2.35358e-20	0.111952	0.216888
NUDT14	2.39586e-20	-0.138479	-0.448625
CAPN7	2.56887e-20	0.0916301	0.482656
PTPRN	2.6225e-20	-0.116567	-1.70345
RSPRY1	2.83813e-20	0.1362	0.293429
KLK8	2.89646e-20	-0.13969	-0.382973
ARPC2	2.91701e-20	0.0884384	0.0994349
PIEZO2	2.96422e-20	-0.11792	-1.09219
TBCK	2.97662e-20	0.0710882	0.495163
USF1	2.99447e-20	0.135404	0.343669
MAPK3	3.08379e-20	-0.124566	-0.340649
GK	3.12962e-20	0.0611599	0.607572
MRPS33	3.2113e-20	0.0987189	0.144703
NCK2	3.28225e-20	0.0770384	0.573142
USP46	3.39604e-20	0.119224	0.320867
GNB2	3.46151e-20	0.108984	0.149546
RAD18	3.53902e-20	0.121346	0.305363
RYK	3.5414e-20	0.110275	0.173379
REEP4	3.5977e-20	0.113769	0.376596
FCHSD2	3.75943e-20	0.110626	0.402743
ZCCHC11	3.79364e-20	0.127156	0.181311
CKS1B	3.80425e-20	0.0847128	0.10761
POLR3K	4.06039e-20	0.110392	0.153454
SBK1	4.11085e-20	0.117115	0.389643
F930015N05RIK	4.19313e-20	0.00926937	1.6375
ZBTB33	4.20266e-20	0.0959374	0.403164
TXLNB	4.298e-20	0.0169387	1.21127
LSM5	4.3236e-20	0.0869022	0.0843699
MRPL36	4.35376e-20	0.112561	0.17405
RASAL2	4.45294e-20	0.100357	0.305584
SLC31A2	4.51881e-20	0.0446415	0.757056
SWAP70	4.57135e-20	0.106469	0.338551
GNAS	4.81916e-20	-0.0765111	-0.12122
TUSC3	4.88297e-20	0.129393	0.2624
CTDSPL	4.92736e-20	-0.126494	-0.534109
TARSL2	5.13368e-20	0.0532288	0.704715
SAR1B	5.14188e-20	0.111212	0.169742
SFRP1	5.2537e-20	-0.159139	-0.300761
CREBZF	5.56342e-20	0.123268	0.228932
FADS1	5.68414e-20	0.127412	0.346009
XIST	5.78228e-20	-0.123637	-0.462851
SUPT3	5.78732e-20	0.100802	0.312067
PIEZO1	5.84804e-20	-0.116709	-0.727862
NRADD	6.13517e-20	-0.136654	-0.481277
SNHG20	6.2022e-20	0.131388	0.256787
DAPK2	6.20395e-20	0.0425639	0.855681
RNF214	6.22604e-20	0.121099	0.290906
E330013P04RIK	6.26756e-20	-0.188093	-2.66594
SLC25A4	6.28183e-20	-0.132111	-0.236948
BRE	6.31084e-20	0.115128	0.355349
ENSA	6.35069e-20	0.142567	0.283504
COBL	6.3575e-20	-0.167387	-1.91667
PLEKHG3	6.93891e-20	-0.103767	-0.997423
KMT5A	6.9762e-20	0.108656	0.140362
NECTIN1	7.04781e-20	-0.145808	-0.4891
MRPL41	7.0828e-20	0.117293	0.191137
LMX1A	7.19097e-20	-0.153985	-2.18253
NOG	7.67268e-20	-0.143933	-1.57731
GXYLT2	7.89497e-20	0.0131335	1.36432
EEF1AKMT1	8.21052e-20	-0.116908	-0.275486
CHRDL1	8.57808e-20	0.0723039	0.561537
CLIC6	8.74964e-20	-0.0982592	-1.64802
PARP8	8.75776e-20	0.0496508	0.769527
EMD	9.7028e-20	0.123301	0.19578
GRIK3	9.88985e-20	0.0465339	0.761661
GM1673	9.98877e-20	0.16452	0.254751
CBLN1	1.00259e-19	0.0747812	0.659407
EIF2AK4	1.00937e-19	0.11494	0.359989
HSPB8	1.0253e-19	-0.111995	-1.57535
PTPN18	1.09893e-19	-0.112122	-2.05456
VARS	1.12098e-19	0.115227	0.166279
TXNDC5	1.12496e-19	0.136843	0.235926
ODF2	1.13813e-19	0.124844	0.219522
STC2	1.14757e-19	0.0877026	0.534491
KDELC1	1.15225e-19	0.122192	0.31368
TAF5L	1.16959e-19	0.103229	0.402994
SLC13A4	1.17615e-19	-0.110778	-1.17332
EHD2	1.23969e-19	-0.0976073	-1.55993
SYPL	1.24854e-19	0.129698	0.286833
GM42372	1.25168e-19	0.0323005	0.965366
ZC3HAV1L	1.25466e-19	0.0833067	0.546853
TMEM100	1.29266e-19	-0.102123	-1.36735
X1190005I06RIK	1.30185e-19	-0.102541
MKNK1	1.30942e-19	0.053351	0.666112
USP47	1.32965e-19	0.127169	0.274094
MAGEH1	1.38075e-19	0.162158	0.295522
PLK4	1.38938e-19	-0.16417	-0.350774
ACADM	1.41964e-19	-0.134524	-0.412528
HMHA1	1.42267e-19	-0.10339	-1.22342
TMEM185A	1.43031e-19	0.0676341	0.355011
RPLP2	1.43141e-19	-0.046872	-0.0695622
LPIN2	1.43715e-19	0.108138	0.425469
NRK	1.52644e-19	-0.124689	-2.31221
SPON1	1.55362e-19	0.107465	0.268549
NTRK3	1.56393e-19	0.0544413	0.694408
YTHDC2	1.65996e-19	0.0946871	0.422575
FER	1.74812e-19	0.0983682	0.452688
PLK2	1.76509e-19	0.0135819	1.59397
PLPP3	1.78765e-19	0.126065	0.422414
RAB1A	2.07165e-19	0.100644	0.141699
PFKP	2.21403e-19	-0.115221	-0.793201
CLCN4	2.29905e-19	0.0813272	0.436823
ODC1	2.35764e-19	0.103159	0.111025
CHCHD1	2.45462e-19	0.0802126	0.106519
SETDB1	2.47067e-19	0.118992	0.228544
FAM160B2	2.57757e-19	0.0525776	0.518731
PTPN9	2.61452e-19	0.0948514	0.459204
ZIC3	2.68503e-19	-0.181407	-0.498726
MAPKAPK3	2.69129e-19	-0.110845	-1.89152
SLC38A1	2.69164e-19	0.119682	0.17885
LYPD2	2.7942e-19	-0.144683	-2.58084
SAMD5	2.99194e-19	0.0363454	0.68561
GNB1	3.01219e-19	0.0918554	0.109578
GM12166	3.07443e-19	0.0942221	0.449161
TNPO1	3.18031e-19	0.108439	0.143234
PCBP2	3.26025e-19	0.0842153	0.0961354
FBXO45	3.30141e-19	0.0964107	0.321729
PPP1R16B	3.34452e-19	0.0404916	0.757221
YAE1D1	3.35413e-19	0.122451	0.186109
BAZ2A	3.5837e-19	-0.132777	-0.347708
TSPAN2	3.59448e-19	-0.118005	-0.837414
RBL1	3.6641e-19	0.0894569	0.446151
FOXA1	3.67488e-19	-0.265021	-2.34696
FAM53B	3.68154e-19	-0.138911	-0.561129
CDC7	3.75064e-19	0.128052	0.343056
RRAGA	3.87958e-19	0.107723	0.154287
RFX7	4.14078e-19	0.126361	0.267245
UHRF2	4.22171e-19	0.116495	0.160833
HJURP	4.2844e-19	0.130526	0.247253
EPB41L1	4.37541e-19	0.0325313	0.908299
FLOT2	4.38113e-19	-0.128701	-0.471466
D630045J12RIK	4.41578e-19	0.0610488	0.64319
AKAP17B	4.42649e-19	0.081022	0.441951
TRAF3IP1	4.46974e-19	-0.138271	-0.563327
HOMER3	4.48169e-19	0.10666	0.360708
DPPA5A	4.61107e-19	-0.107694	-1.74903
KPNA1	4.63855e-19	0.0958763	0.218938
SKP2	4.76513e-19	0.118596	0.227529
SEPT8	5.27353e-19	0.0857549	0.434069
TTYH1	5.44282e-19	-0.104649	-0.970335
LSM12	5.54644e-19	-0.0898604	-0.187771
NFATC4	5.888e-19	-0.11264	-0.814949
USP6NL	6.29112e-19	0.102072	0.393144
SORCS2	6.3576e-19	-0.109403	-1.48849
PSME1	6.69174e-19	-0.120168	-0.30217
TXNRD3	6.69754e-19	0.0496139	0.635262
ATG3	6.74652e-19	0.117367	0.274889
LIN28B	7.12914e-19	0.141363	0.231551
PWP1	7.82116e-19	0.115954	0.184571
ATAD5	8.12166e-19	0.146666	0.279418
SLC30A9	8.32377e-19	0.124901	0.238631
ASF1B	8.32892e-19	0.107597	0.25625
SPATA7	8.39389e-19	0.0787028	0.323613
ZFP462	8.45075e-19	-0.139965	-0.354324
ZFP62	8.75311e-19	0.130519	0.384626
CASD1	8.80248e-19	0.116897	0.40706
TM7SF3	8.89355e-19	0.0797602	0.478124
COQ2	9.21104e-19	0.118635	0.302525
CHST10	9.75757e-19	0.0366072	0.782932
NAPRT	9.75757e-19	-0.0970025	-1.07791
ZFP397	9.77238e-19	0.123416	0.331863
ATP5C1	1.00506e-18	-0.0880555	-0.174442
RNF220	1.05863e-18	0.115848	0.217486
[truncated: 7,446 more rows]

## Sheet: PhenoGraph cluster 3
gene	P-value (FDR adjusted)	MAST Hurdle	logFC
MEST	0	2.13409	1.95303
IGFBP2	0	1.29313	1.73179
TCF7L2	0	0.871187	2.10489
HES1	0	0.798578	1.77419
CTNNBIP1	0	0.782862	1.29131
SALL2	0	0.681811	1.21999
STOX2	0	0.670143	1.31045
SIX3	0	0.640977	4.80673
PHLDA1	0	0.621147	2.7613
HDAC6	0	0.590139	1.51838
PAX6	0	0.58842	2.67781
SLC25A4	0	0.579433	0.914428
IRS4	0	0.560635	3.02197
LMAN1	0	0.546822	0.969298
EFNB2	0	0.508257	1.82853
SHISA2	0	0.498009	3.14882
CD47	0	0.490497	1.88057
GLDC	0	0.42777	1.62724
LPAR1	0	0.395877	1.90518
HESX1	0	0.384984	2.84672
FBN2	0	0.334974	2.67597
PTPRZ1	0	0.314802	2.65026
LHX2	0	0.281428	5.12297
DUSP5	0	0.251518	1.95511
FZD5	0	0.250688	3.07494
FZD8	0	0.243515	2.12484
RAX	0	0.240134	4.38226
HOPX	0	0.231488	3.50004
FEZF1	0	0.209381	3.4197
SCUBE1	0	0.203708	3.11995
MAF	0	0.133264	3.68788
NRG1	0	0.112277	3.1055
ALDH1A2	0	0.105379	3.98808
GREM1	0	0.0757782	3.37376
SHTN1	0	0.0426756	3.59509
SIX6	0	0.0311357	4.99019
FOXG1	0	0.0199559	5.78573
BEX3	0	-0.52664	-0.801486
RBPMS2	0	-0.605965	-2.12763
CRIP2	0	-0.636386	-2.1584
CD24A	0	-0.683647	-1.31793
AXIN2	0	-0.689143	-2.5656
AES	0	-0.71384	-1.91185
CITED2	0	-0.742944	-1.4625
EZR	0	-0.820397	-2.03006
FOXB1	0	-0.846822	-2.79299
TNFRSF19	0	-0.863929	-4.35668
WLS	0	-0.889622	-2.70541
RFX4	0	-1.01745	-4.84594
IRX1	0	-1.03869	-4.40396
IRX5	0	-1.17203	-4.96425
IRX3	0	-1.35571	-4.98084
FAM181B	0	-1.38844	-4.16287
POU5F1	0	-1.76553	-4.50973
GJA1	4.37417e-298	0.657973	1.00779
VAX1	5.04378e-298	0.0065062	5.11106
IRX2	1.22556e-295	-1.0379	-4.18167
EFNB1	2.01309e-295	-0.703888	-2.22556
AUTS2	9.86647e-287	-0.476119	-1.26083
OTX2	1.06371e-284	0.980986	1.62537
FABP7	6.80451e-284	-0.88561	-5.16179
VIM	3.59562e-281	-0.716972	-2.24378
TLE4	1.88726e-275	0.795073	1.19331
H2AFY	1.56046e-273	0.564295	0.869823
GBX2	5.49254e-267	-1.0743	-4.30542
WNT5B	7.66521e-267	0.163787	1.89983
FZD10	8.15459e-264	-0.912689	-5.45896
ARGLU1	3.05699e-262	0.333928	0.523482
IGDCC3	4.22691e-262	-0.703545	-2.18451
CKB	9.13459e-262	-0.763436	-2.53777
TAC1	2.09094e-255	0.0450343	2.97865
SP5	9.81756e-255	-1.22875	-4.10589
TMEM108	2.3904e-252	0.37893	1.45088
HES3	7.19932e-249	-1.03497	-2.78221
SLC9A3R1	7.03404e-246	-0.478024	-1.31525
PALLD	3.32731e-242	0.6298	1.27524
FST	8.93527e-235	-1.2593	-2.70129
TOX3	1.83122e-233	0.614408	1.24443
RBP1	1.50318e-232	-0.684117	-1.46916
NDUFA12	7.10665e-231	-0.408952	-0.759831
ERAS	1.1992e-226	0.600178	1.4137
EN1	8.90632e-222	-2.42626	-4.80897
ZFP36L1	4.64105e-216	0.601246	0.973831
TNFAIP8	1.2524e-215	0.410991	0.978939
A730017C20RIK	2.60123e-214	0.112915	2.01366
MYCL	9.03348e-210	-0.579623	-1.81447
FOXD1	3.00401e-209	0.16642	1.90906
SOX11	8.72769e-208	0.41308	0.650859
NRCAM	7.5724e-207	0.209452	1.62514
ERMN	1.1221e-205	0.10797	1.77546
IGF2BP2	5.41391e-205	0.399209	0.686494
CDH1	1.42319e-204	-0.94354	-4.5357
CDH2	2.41394e-202	0.849749	1.10476
UPP1	3.7335e-202	-1.03121	-3.24315
SOX5	2.27836e-201	0.139471	1.85637
HMGN3	4.08584e-201	0.491366	0.911582
X9430076C15RIK	1.52853e-200	0.0242967
PEG12	3.53294e-197	0.317606	1.4396
LMO3	4.17132e-197	0.110988	1.90471
EDN1	2.88319e-193	0.0835082	2.37645
DMRTA2	4.7341e-192	0.0710499	2.33824
SOX6	3.26577e-191	0.0571871	2.41625
NAV2	1.40418e-188	-0.474772	-1.57327
CAR2	2.04232e-186	0.244694	1.35528
RND3	1.74234e-184	-0.441994	-1.54403
MPPED1	3.02038e-181	0.0785806	1.97043
RPRM	6.22486e-181	0.238236	1.52013
WNT8A	1.02399e-178	-1.40135	-7.41783
SYT11	5.47259e-178	0.417091	1.08857
PAK3	7.91495e-178	0.213306	1.56516
HSPB1	4.31371e-177	-0.978792	-7.78559
JAM3	2.08074e-175	0.458199	0.836599
PLEKHA1	3.97589e-175	0.486644	1.02061
KLHL13	1.03553e-173	0.225637	1.27173
SMOC1	1.49662e-173	0.118791	1.83312
PRKAR2B	1.12018e-172	-0.431427	-1.40937
H3F3A	3.37411e-172	0.185689	0.274206
NECAB2	6.0578e-172	0.164698	1.46827
MYCN	1.93265e-171	0.532536	1.06036
SOX2	1.73529e-169	0.598182	0.817091
EPCAM	2.07135e-167	-0.880433	-2.16082
COX8A	6.2202e-167	-0.219841	-0.327563
ATP5L	1.96799e-166	-0.302038	-0.488351
HPRT	2.8486e-166	-0.396102	-1.00333
MEX3B	4.2388e-166	-0.506458	-1.62169
POU3F2	7.54984e-166	-0.85253	-2.88627
GLI3	6.14988e-165	0.500814	1.00175
CST3	4.28823e-164	0.318289	0.529359
EPS8	9.0472e-163	-0.494991	-2.38136
ATP5K	1.22397e-162	-0.353555	-0.59687
HOXA1	4.619e-161	-2.00764	-7.62948
ADGRL3	7.52858e-160	0.186862	1.47696
LMX1B	1.25653e-159	-0.665734	-3.40375
IFT57	5.1106e-158	0.308244	1.04507
MIAT	3.01637e-157	0.201382	1.39878
SERF1	4.86225e-157	0.53151	0.84253
CHCHD10	9.56766e-156	-0.6094	-1.69708
PHOX2A	7.34426e-155	-0.818168	-4.44189
HS3ST3B1	6.57509e-154	0.0916638	1.81353
SULF2	2.49717e-152	0.306846	1.02549
DLK1	2.84848e-152	0.159015	1.68085
CBLN2	1.09928e-151	0.00988261	3.81018
PEX5L	3.34165e-150	0.0880996	1.84578
CXCL12	1.74464e-149	-0.987141	-4.68362
AKR1B3	1.8848e-149	-0.320739	-0.616536
APPL1	1.98891e-149	0.360815	0.787945
ECI1	4.80692e-149	-0.484444	-1.85412
IDI1	7.68325e-148	0.400533	0.848236
HOXB2	2.97246e-147	-1.46346	-4.50794
ZEB1	8.71487e-147	0.306702	1.15202
QK	2.36757e-146	0.341167	0.568022
PTH1R	1.40275e-145	-0.496459	-2.41155
SLC1A3	2.22401e-145	-0.477064	-2.21734
SRCIN1	5.19205e-145	0.12837	1.5766
CDH11	6.33145e-145	0.245747	1.2881
L1TD1	8.84755e-145	-0.832109	-3.33751
DENND1A	4.6171e-144	0.181904	1.28773
DACH1	6.42649e-144	0.0951791	1.77623
SASH1	1.39061e-143	-0.402037	-1.49749
CELSR1	5.09909e-142	-0.44613	-1.61099
NKX6-1	7.32887e-141	-0.969169	-3.4537
HOXB1	1.94743e-140	-1.56684	-5.78135
GM42637	2.31403e-140	-0.709496	-4.71333
PCDH15	1.38243e-138	0.00675299	4.02523
FGFR1	1.78459e-138	-0.378501	-0.772512
FAM53B	3.68996e-138	0.21841	1.06908
VRTN	9.40462e-138	-0.75144	-5.48334
ALYREF	4.05076e-136	0.295162	0.489075
CRABP1	5.16396e-135	-0.913817	-1.69493
TUBB2B	9.36769e-134	-0.444304	-1.08404
DMD	1.19988e-133	0.0919344	1.64281
APELA	1.30407e-131	-0.888549	-4.09983
PLA2G16	8.74784e-131	-0.443516	-2.35806
GPC3	1.16293e-130	0.507752	0.888189
LIN28B	6.08347e-130	0.345875	0.656658
PGM2	7.99571e-130	-0.381623	-1.23239
FGF10	1.02435e-129	0.0358001	2.34627
ARHGAP10	2.09486e-129	-0.375258	-1.69734
GPX8	2.51958e-129	-0.401355	-1.85045
SPON1	8.86247e-128	0.30352	1.1204
UQCR10	2.7177e-127	-0.230687	-0.367744
IPO5	7.55702e-125	0.285623	0.483012
ATPIF1	1.44185e-123	-0.221898	-0.331831
ZFP266	3.23494e-123	0.359298	0.613709
GM10076	6.88088e-123	-0.489431	-0.740861
RPL37	3.94996e-122	-0.198316	-0.295476
SCUBE2	2.32662e-121	0.148013	1.40757
PCSK1N	2.86374e-121	0.702774	0.975571
TMEM238	4.67661e-119	-0.491359	-2.38661
GALK1	6.39245e-119	-0.270621	-0.569362
FUOM	1.41811e-118	-0.663277	-4.37488
CGNL1	4.35584e-118	-0.616916	-2.74849
EMX2	5.89633e-117	0.113444	1.7023
CYP26A1	9.92687e-117	-0.890279	-3.5557
SCD1	1.58383e-116	0.185381	1.2035
PNP	2.72973e-116	-0.274785	-0.647082
NUDT4	5.53039e-116	-0.34834	-0.971889
PDPN	5.57316e-115	-0.409416	-2.45702
IGFBP5	4.9952e-114	0.39989	1.28683
APOC1	8.90073e-114	-0.503978	-2.677
RPS13	2.35652e-112	-0.100242	-0.144636
F2R	3.40556e-112	0.301539	0.844594
TIPARP	4.10668e-112	0.252595	0.952324
TMEFF1	8.66708e-112	0.341275	0.663408
MKRN1	3.03189e-111	-0.330893	-0.685769
TIMM8B	6.37878e-111	-0.215414	-0.365557
LTBP1	9.49521e-111	0.181555	1.16602
NR2F2	3.90545e-110	0.37104	0.978184
WNT1	1.60754e-109	-1.3748	-4.71672
ADGRL2	2.28803e-109	0.462531	0.751206
FAM124A	4.48391e-109	0.0303435	2.31837
GAS2L3	6.17828e-109	0.178114	1.19601
NANOG	8.5072e-109	-0.904327	-6.61055
HNRNPF	1.10278e-108	0.213225	0.325186
GPD2	1.35134e-108	0.281819	0.874405
PIM2	1.38916e-108	-0.493031	-1.28544
RPL28	1.89663e-108	-0.115357	-0.167902
MYO10	1.56842e-107	0.436828	0.713939
CACNA2D1	2.20428e-107	0.0325278	2.17962
NDN	4.34461e-107	0.404267	0.694452
FGFRL1	4.57792e-107	0.132879	1.29017
MTAP7D3	6.47311e-107	-0.383188	-1.44475
RPS8	1.58111e-106	-0.104344	-0.15479
WNT4	5.01973e-106	-0.57378	-3.13719
TMEM256	2.71772e-105	-0.266614	-0.512849
IMPACT	5.04597e-105	0.251466	0.852994
HIPK2	8.44828e-105	0.335522	0.725008
EYA2	1.8383e-104	0.0532525	1.80669
MYB	4.07632e-104	0.0712486	1.62106
DEPDC7	3.50364e-103	0.118575	1.33956
MGST1	3.59703e-103	0.242127	0.887542
X1810022K09RIK	2.07719e-102	-0.273009
COX7C	4.21534e-102	-0.180206	-0.268602
SNX10	9.93364e-102	0.278808	0.730402
GM3453	3.15384e-101	0.0471393	1.84568
INA	4.68394e-101	0.390328	0.916989
APOE	5.87231e-101	-0.392184	-0.77202
NDUFB4	6.61404e-101	-0.241118	-0.447269
TMSB10	7.21302e-101	-0.18727	-0.278923
X3110039M20RIK	1.2462e-100	0.00104463
TLE1	5.98285e-100	0.29646	0.832143
ADAMTS19	1.68238e-99	0.0530379	1.76883
MECOM	5.10278e-99	0.0931055	1.52051
RPL36	3.5497e-98	-0.149975	-0.217645
TMEM47	3.75368e-98	0.387433	0.668875
MIR124-2HG	3.96249e-98	0.309681	0.942266
BOC	4.25944e-98	-0.504419	-2.74396
MTHFD2L	6.3734e-98	0.316167	0.660935
RPS29	1.42534e-97	-0.203793	-0.301088
X5930412G12RIK	2.51921e-97	-0.494882
ADA	5.34536e-97	0.055049	1.67397
NDUFS6	5.39563e-97	-0.196615	-0.307033
CSNK1E	1.42476e-96	0.270473	0.500205
TMEM132C	1.93149e-96	-0.499491	-2.20291
RPL37A	2.91045e-96	-0.158416	-0.233725
ROBO1	3.3669e-96	0.224442	1.0075
EPHA4	4.21937e-96	0.469085	0.891725
PHACTR2	5.8764e-96	0.12522	1.25647
TACC2	1.11485e-95	0.282342	0.727783
RAB25	1.62728e-94	-0.525319	-2.71774
CBX3	1.93298e-94	0.227333	0.353116
HOXA2	3.14445e-94	-1.26929	-5.87785
HEBP2	3.22176e-94	-0.33952	-1.91246
CELF2	5.7014e-94	0.366625	0.849743
CLDN10	1.15405e-93	-0.644523	-3.1297
ATP5A1	1.34786e-93	-0.194488	-0.308063
VEGFC	1.97405e-93	0.0522709	1.78539
CDH20	2.99515e-93	0.06091	1.69382
SPRY1	5.28567e-93	0.187054	1.17703
TAGLN2	1.37742e-92	-0.326213	-0.790602
MIR17HG	3.37075e-92	0.35875	0.747906
MRPL42	4.46143e-92	-0.215517	-0.352251
MAOB	8.12307e-92	0.0766664	1.50017
ATP5G1	5.11636e-91	-0.181268	-0.27053
LPAR6	9.65054e-91	0.290451	0.810322
TPM1	2.48446e-90	-0.264858	-0.542095
FAM181A	2.75347e-90	-0.502048	-2.90656
ISOC1	3.11152e-90	0.289326	0.606587
H2-K1	8.14944e-90	0.366517	0.708575
BRI3	2.4722e-89	-0.227409	-0.390808
PANTR1	4.37171e-89	-0.465036	-2.59146
ARF4	6.17349e-89	0.232934	0.41301
MIP	6.60345e-89	0.0536212	1.68578
EEF1E1	1.00152e-88	0.268647	0.499214
CSRP2	1.52702e-88	0.304289	0.524553
X1810058I24RIK	3.1036e-88	0.20693
AU020206	4.39371e-88	0.228474	0.759309
PDZPH1	9.07824e-88	-0.384632	-1.47506
PAPPA	1.1354e-87	-0.497595	-3.12166
GPC6	1.34188e-87	0.292423	0.673451
CLIC1	1.38106e-87	0.243137	0.432864
NDRG2	2.04724e-87	-0.492807	-3.43194
SCD2	4.99063e-87	0.308357	0.546267
PFN2	5.65807e-87	0.320774	0.646988
PAX2	9.39251e-87	0.29208	0.944248
EN2	5.06694e-86	-1.23604	-4.51548
SFRP5	5.12577e-86	-0.606872	-3.94402
NRXN3	8.63935e-86	0.0598278	1.63901
CD2AP	2.1284e-85	0.288358	0.5193
CMAS	6.52485e-85	0.283198	0.608859
ARL4A	9.23973e-85	-0.467145	-1.25404
NKD1	1.12224e-84	-0.401561	-1.22666
RSPO1	2.01717e-84	-0.404231	-2.02944
MYLK	3.83193e-84	-0.422144	-1.44692
COX20	4.44844e-84	-0.268015	-0.792383
FLRT1	5.3485e-84	-0.521344	-2.44568
SH3GL3	8.48333e-84	-0.369076	-2.40237
ATP5B	2.02901e-83	-0.193158	-0.308739
TBCA	4.82887e-83	-0.197596	-0.321473
GNA14	5.26625e-83	-0.697763	-5.13405
ARID3C	1.41385e-82	0.0257497	2.14209
RHEB	1.56827e-82	0.222344	0.402663
ITGB5	1.62686e-82	-0.334309	-1.49932
CASK	1.91897e-82	0.185083	0.930584
LMO2	2.42597e-82	0.0395962	1.90603
HSPA4L	6.72145e-82	0.217591	0.917896
CDKN1C	6.91986e-82	0.405755	0.782735
YWHAQ	1.52204e-81	0.16057	0.251258
NAV1	1.94996e-81	0.352462	0.7774
KLHL2	1.94996e-81	0.190671	0.847231
RPS21	2.34864e-81	-0.152496	-0.225786
FIGN	2.77371e-81	0.330352	0.776545
SAMD5	3.13079e-81	-0.727006	-5.0046
RPS16	3.84239e-81	-0.0888256	-0.133432
TMEM167	8.31485e-81	0.182702	0.299597
CLDN6	1.16637e-80	-0.550608	-2.75045
HELLS	1.8514e-80	-0.264693	-0.418564
MED30	1.88898e-80	0.269116	0.505268
SORBS2	1.90502e-80	0.182257	1.0254
PHIP	2.33847e-80	0.240654	0.431079
ATP5C1	4.20065e-80	-0.179494	-0.303716
RNF165	6.99944e-80	0.363116	0.775433
SRSF9	1.43479e-79	0.199846	0.339138
SNRPF	1.59257e-79	0.183943	0.289965
NSG2	1.98642e-79	-0.359923	-1.56988
PRTG	3.08763e-79	0.319175	0.518325
STX3	3.96663e-79	-0.321113	-1.35835
OLIG3	4.73269e-79	-1.11984	-6.08949
CALB2	6.72996e-79	0.078684	1.56446
ARID3A	1.06754e-78	0.289792	0.789364
CFL2	2.03684e-78	0.239827	0.466677
SLC2A1	2.19752e-78	0.295784	0.467752
IGFBP4	2.74465e-78	0.285716	0.646168
OXCT1	3.45164e-78	-0.328336	-1.08327
ARMCX3	3.49182e-78	0.235262	0.699068
EPHA1	7.55137e-78	-0.466227	-3.01391
ZFP365	8.90624e-78	0.0659031	1.4123
CADPS2	1.21783e-77	0.0492043	1.60072
POLR2L	1.43914e-77	-0.28783	-0.667118
FOXD4	2.35716e-77	0.149946	0.712729
NR1H5	4.78224e-77	0.292668	0.640708
FGFR3	7.24813e-77	-0.446666	-3.3489
COMMD3	1.35246e-76	-0.280445	-0.846993
VSTM2B	2.39692e-76	-0.343634	-1.00612
WBP5	3.25902e-76	-0.184718	-0.28033
UCHL1	3.27194e-76	0.361528	0.716606
ATP5J2	8.56695e-76	-0.145096	-0.223055
PCDH17	9.09937e-76	0.0738408	1.37001
CEP78	9.96266e-76	0.246627	0.587276
MEIS1	1.34894e-75	0.191475	1.01435
ZBTB38	1.43774e-75	0.0776262	1.33004
CNBP	1.61361e-75	0.168124	0.261712
GRTP1	1.78562e-75	0.182011	0.857922
CALD1	4.12907e-75	-0.283492	-0.580342
FOXA2	5.28298e-75	-1.42718	-4.94417
X2700060E02RIK	5.46451e-75	0.153078
ZFP422	6.06208e-75	0.297328	0.548374
OAT	1.93844e-74	-0.323971	-0.812963
TUBA1A	2.20389e-74	-0.238896	-0.393107
OTX1	2.76356e-74	0.138085	0.432188
CCNJL	3.13644e-74	-0.293073	-0.869851
ENO4	3.8285e-74	0.0180578	2.37218
JAG1	6.11888e-74	-0.38013	-1.29712
HIST1H2AK	6.56719e-74	-0.518472	-0.957963
CERCAM	6.92366e-74	-0.338615	-2.52127
FBLIM1	9.11952e-74	-0.341528	-1.85106
ACOT13	1.17636e-73	-0.27926	-0.929371
LRPAP1	2.16497e-73	-0.265909	-0.738487
CCNB1IP1	2.50905e-73	-0.562394	-4.9021
RPL41	2.81291e-73	-0.12021	-0.178993
ZWINT	2.94407e-73	0.222195	0.411905
EFNA5	1.09353e-72	0.317658	0.70583
IFITM2	1.15181e-72	0.249115	0.359865
HADH	1.58348e-72	0.208551	0.384969
ECHDC2	1.61831e-72	-0.295942	-1.3072
E130012A19RIK	2.44486e-72	-0.27639	-0.605046
CDX2	3.17104e-72	-2.44511	-9.97849
A830018L16RIK	3.23274e-72	-0.349305	-1.87693
N4BP2	3.87008e-72	0.299642	0.614522
CHST2	6.0698e-72	-0.276521	-0.83314
ZBTB16	7.27321e-72	0.269127	0.828153
GPC4	1.56349e-71	0.0978628	1.20925
DNAJC24	4.07173e-71	0.241493	0.495484
RNF138	5.68427e-71	0.246082	0.514517
E330013P04RIK	5.90966e-71	0.0201013	2.23375
FHDC1	1.32476e-70	-0.356133	-2.30084
ZEB2	1.52038e-70	-0.28012	-0.594689
GLIS2	1.58462e-70	0.119276	0.973913
PTCH1	1.86406e-70	-0.478582	-1.19138
ZMYND8	2.14162e-70	-0.256605	-0.553875
NDUFC1	4.22371e-70	-0.180163	-0.300536
RPS2	4.87406e-70	0.125283	0.180434
HINT2	6.77828e-70	-0.239744	-0.651623
MSX3	8.8465e-70	-0.774315	-3.65001
OAF	1.14457e-69	0.132353	0.957925
ASXL3	1.43397e-69	0.0456241	1.64472
ROR1	1.53187e-69	-0.291169	-1.63993
PPP3CA	1.72054e-69	0.224123	0.799316
RXRG	2.11543e-69	-0.370601	-2.76952
CLDN7	2.11543e-69	-0.522039	-3.03082
SERTAD4	2.75322e-69	0.0163684	2.31987
PLXNC1	3.66e-69	-0.290679	-1.56395
IRF2BPL	3.76845e-69	-0.344985	-1.20493
RPL18	4.57763e-69	-0.0932691	-0.138946
RPL19	5.51782e-69	-0.0796425	-0.115852
ROR2	5.90925e-69	-0.285099	-0.899512
X6330403K07RIK	6.20763e-69	0.266944
RPS14	7.03872e-69	-0.0828185	-0.121071
PLCB4	8.00629e-69	0.235975	0.797606
ZIC3	9.78112e-69	-0.307369	-0.821188
ACTG1	9.97377e-69	-0.161615	-0.236275
GM45009	1.66117e-68	0.0362927	1.87889
RNF7	1.93308e-68	0.163174	0.265941
MLLT10	2.99771e-68	0.251127	0.488673
PPP1CB	4.11878e-68	0.239893	0.457357
GM1673	4.48927e-68	0.292038	0.489917
LMO1	8.62275e-68	0.286461	0.562436
COL2A1	9.046e-68	-0.311293	-0.897904
LHFP	1.05712e-67	0.0474133	1.56142
THOC7	1.32405e-67	-0.175555	-0.330667
SHB	1.49999e-67	-0.304873	-1.65115
SLC39A10	1.55229e-67	0.258285	0.506682
PDGFA	1.66616e-67	-0.303162	-0.722238
MBP	1.75292e-67	-0.272077	-1.37276
DMBX1	1.84396e-67	-0.658683	-4.71678
URM1	1.87568e-67	-0.25268	-0.773552
FAM135A	2.31801e-67	0.179692	0.68228
MPP6	4.15704e-67	0.216505	0.387908
RPL6	4.15704e-67	-0.119145	-0.18071
SP9	5.24688e-67	-0.416641	-2.61239
RPL36AL	5.53086e-67	-0.126092	-0.18822
SSBP2	8.97961e-67	0.258986	0.718234
IGSF21	1.02105e-66	-0.3226	-2.58081
RCN2	1.06441e-66	0.264794	0.466435
PDE1A	2.03664e-66	0.0115608	2.69264
TFDP1	2.14897e-66	0.214031	0.400181
PDLIM4	2.75409e-66	-0.296057	-1.20191
HIST1H2AP	3.33837e-66	-0.627189	-1.01234
PEX2	8.06903e-66	0.219789	0.562876
BAZ1A	9.13592e-66	0.279673	0.643251
PODXL	1.01289e-65	-0.273424	-0.797421
RPL31	1.0922e-65	-0.111429	-0.164246
TSHZ1	1.33368e-65	-0.412869	-1.95342
ZFP516	1.58563e-65	0.245446	0.738617
ATP5E	1.9512e-65	-0.148696	-0.221327
NDUFV3	1.97209e-65	-0.200427	-0.348529
X1700019D03RIK	2.54173e-65	-0.344447
MYL7	2.74883e-65	-0.305926	-2.03295
PAFAH1B2	3.36366e-65	0.23096	0.443294
NDUFA2	3.58179e-65	-0.15764	-0.244202
C1QL1	6.44565e-65	0.180664	0.85885
NKX6-2	8.6268e-65	-0.753319	-3.22656
BTBD17	1.19001e-64	-0.296371	-1.03462
RPL9-PS6	1.5939e-64	0.178044	0.288683
ODC1	1.77114e-64	0.188977	0.305021
RNF220	2.34629e-64	-0.233716	-0.578239
RAPH1	2.48999e-64	0.237851	0.627494
ELP4	2.64738e-64	0.242486	0.552264
LRRTM3	3.04151e-64	0.077189	1.36269
KIF1A	3.68342e-64	0.136651	0.898196
TMEM258	4.39575e-64	-0.17181	-0.287997
PROK2	4.87935e-64	0.0151467	2.42796
KLK8	5.76172e-64	0.246697	0.523338
PLEKHM3	6.89497e-64	0.0738654	1.22371
NDUFB9	6.97926e-64	-0.156126	-0.267277
HCFC1R1	9.47105e-64	-0.254034	-0.84534
ARL4C	1.30658e-63	0.28283	0.571809
SNRPN	1.38458e-63	0.262339	0.459928
DSTN	1.82013e-63	-0.180466	-0.307577
SPRY2	2.17264e-63	0.249945	0.909047
POU3F3	3.10872e-63	-0.49622	-3.49664
PHLDA3	3.67348e-63	-0.390599	-1.46272
CD302	4.11094e-63	0.147654	0.835385
GM8797	4.2075e-63	0.243705	0.449053
ATP6V1B2	6.91825e-63	0.228967	0.504197
HNRNPA2B1	8.33534e-63	0.172155	0.265428
PCNT	8.51414e-63	-0.310977	-0.878193
IGFBP3	1.23469e-62	0.0894152	1.226
PLAGL1	1.30086e-62	0.0693773	1.52161
DMRTA1	1.75997e-62	0.0269278	2.09454
TNRC6C	1.83719e-62	-0.21289	-0.420785
CMTM8	1.88546e-62	0.269179	0.642892
MRPL34	2.06846e-62	-0.238143	-0.396458
HNRNPA1	2.7762e-62	0.106885	0.157741
GALT	3.47796e-62	-0.281522	-1.75849
TSPAN5	4.59274e-62	0.227684	0.526365
LY6E	5.49355e-62	-0.264517	-0.6141
IKZF2	1.64429e-61	0.183706	0.86937
IFITM1	1.71856e-61	-0.318385	-0.682623
FAU	1.8424e-61	-0.108114	-0.161764
SCOC	2.14229e-61	0.240935	0.461478
GRIK3	3.27576e-61	-0.291571	-2.32662
CRB3	3.75745e-61	-0.388696	-2.7038
DENND5B	5.35639e-61	0.217438	0.689386
NKX1-2	7.92631e-61	-0.666836	-3.31448
PFDN4	9.09126e-61	0.18798	0.336755
LPAR4	1.06302e-60	0.289407	0.550949
PPIP5K2	1.15158e-60	0.227486	0.535704
CDH6	1.42475e-60	0.0478525	1.48282
RAMP2	2.08342e-60	-0.292931	-0.907783
NPAS3	3.09221e-60	-0.31846	-2.31532
MLLT3	4.3364e-60	-0.306276	-0.73662
APBA2	7.56788e-60	0.192892	0.778798
ZFP703	8.09779e-60	-0.270464	-1.13794
CAPG	9.43984e-60	-0.27992	-1.79906
ABRACL	1.03774e-59	0.175326	0.29814
EIF1	1.10433e-59	-0.10028	-0.145624
ELOVL4	1.22395e-59	0.124576	0.898391
COL9A1	1.32158e-59	0.0287562	1.79295
ZFP871	2.02397e-59	0.231727	0.605309
SCN5A	2.64527e-59	0.0135114	2.37352
TOMM5	2.6473e-59	0.170019	0.265769
PLS3	3.28188e-59	0.313991	0.53268
TGFB1I1	3.35873e-59	0.0457311	1.27888
UQCRH	3.51149e-59	-0.113255	-0.177103
ARL6IP6	4.23251e-59	0.219966	0.426969
DHX32	4.32879e-59	0.197571	0.71711
FBLN2	5.5944e-59	-0.315386	-1.60826
GM38393	7.16699e-59	0.124031	0.900418
TPT1	8.95545e-59	0.0894894	0.139416
PLPPR3	9.22563e-59	0.0664187	1.25134
AP1M2	9.92386e-59	-0.313184	-2.20174
RPL38	9.97428e-59	-0.142435	-0.211106
RHOC	1.14243e-58	-0.235721	-0.764473
CPSF6	1.44168e-58	0.197802	0.358209
UQCR11	2.03126e-58	-0.149363	-0.240336
NR2F1	2.8922e-58	-0.138488	-0.502982
HNF1B	3.49923e-58	-0.701757	-5.5004
CACYBP	8.97454e-58	0.15553	0.245195
GM26669	9.70411e-58	0.0997757	1.12272
SF3B6	1.1141e-57	0.14823	0.241946
SCAND1	1.14024e-57	-0.172106	-0.312708
GRIA3	1.35565e-57	-0.259899	-1.71212
EPHX2	1.36061e-57	-0.382411	-3.01848
RGS20	1.57923e-57	0.0175807	2.16167
BCL2L11	2.30223e-57	0.237655	0.633003
GM5796	2.80957e-57	0.0228715	1.87428
X2610027F03RIK	4.32829e-57	-0.711524
PDLIM1	4.95113e-57	-0.274231	-1.64944
X2700046A07RIK	5.10853e-57	-0.496701
FTL1	5.29333e-57	-0.114028	-0.164387
OPCML	5.29333e-57	-0.410141	-2.11175
PAX5	5.32194e-57	-0.386754	-1.50034
MAGEH1	1.02902e-56	0.261823	0.537143
SPRED3	1.12484e-56	0.103694	1.01845
EIF4EBP1	1.16643e-56	0.189324	0.327609
FEZF2	1.58078e-56	0.0787205	1.06752
AMER2	1.92705e-56	0.113094	0.932099
FZD2	2.68469e-56	0.282747	0.449613
B4GALT1	2.69121e-56	-0.235016	-1.23691
DUSP7	3.19752e-56	0.163779	0.765591
CKS1B	3.28051e-56	0.143517	0.241139
PELI2	3.58345e-56	-0.230363	-0.783822
GABRG1	5.0862e-56	-0.684146	-5.23466
FZD1	5.7967e-56	0.057129	1.29421
CALCA	5.7967e-56	-0.356533	-1.59823
DDIT4	1.07602e-55	-0.286127	-0.667641
ZCRB1	1.86599e-55	-0.192164	-0.345953
AJAP1	1.90758e-55	0.18065	0.821981
COX7A2	2.20696e-55	-0.113537	-0.171564
MEOX1	2.21979e-55	-0.752063	-5.68902
GM6133	2.69414e-55	0.260177	0.55864
DLC1	3.5249e-55	0.0627672	1.29761
SH3D19	4.04687e-55	0.113186	0.873083
ELOF1	4.27738e-55	-0.156204	-0.263649
FRAS1	6.16517e-55	0.122822	0.864149
ZFP503	9.69306e-55	0.316015	0.84152
RPL13	1.2376e-54	-0.0885882	-0.129302
YBX3	1.33443e-54	0.164489	0.277989
SPARCL1	1.50609e-54	-0.474157	-3.2836
NDUFS7	1.95496e-54	-0.163609	-0.34489
GCSH	2.35834e-54	0.182849	0.342443
NEGR1	2.52376e-54	0.066618	1.24509
SALL3	3.26785e-54	0.257568	0.67294
UBE2S	3.6497e-54	-0.162287	-0.232408
RPL36A	4.23303e-54	-0.0894069	-0.132124
CDK6	4.23303e-54	-0.259842	-1.37423
SAMD1	4.61984e-54	0.223625	0.508051
SLC7A3	5.16888e-54	-0.2826	-1.49694
DMRT3	6.13604e-54	0.0478905	1.2264
XPOT	8.08698e-54	0.227875	0.518337
TTR	9.28717e-54	-0.612053	-5.09587
SELENOH	9.65123e-54	-0.1193	-0.180271
GSTA4	1.3166e-53	0.203793	0.354635
SYT7	1.33317e-53	-0.240551	-1.16125
CACNB3	1.35344e-53	-0.233704	-1.03642
PACSIN3	1.55075e-53	-0.234008	-1.38342
RPL21	2.34889e-53	-0.081215	-0.114589
RPS27	3.27273e-53	-0.131837	-0.191887
RPL13A	3.79963e-53	-0.175255	-0.282538
IL17RD	4.51388e-53	0.147667	0.926001
MRPS21	4.51388e-53	-0.152986	-0.260017
STRA13	4.79666e-53	-0.185405	-0.3588
PDZRN3	4.86331e-53	-0.270936	-1.4099
RPL27-PS3	5.67245e-53	0.154677	0.252625
CDX1	6.96592e-53	-0.71609	-2.84465
TMEM98	7.10078e-53	-0.243272	-1.67341
ARID3B	8.00498e-53	-0.254065	-0.627527
TRAPPC13	1.00108e-52	0.187617	0.396389
CXX1B	1.10404e-52	-0.251154	-0.83526
NR2E1	1.59966e-52	0.0267395	1.67727
ZHX1	1.99504e-52	0.163246	0.814477
NABP2	2.61734e-52	-0.185204	-0.408946
ZCCHC11	3.00607e-52	0.208149	0.387892
TCEA3	3.36261e-52	-0.261506	-2.05699
STUM	3.70609e-52	-0.358656	-3.24652
CELRR	3.72423e-52	-0.585438	-4.56724
ACER2	4.02843e-52	0.155276	0.0963562
WDR6	4.61323e-52	0.259318	0.550154
HMGA2	4.64182e-52	0.249544	0.418594
CRIP1	5.51876e-52	-0.24721	-0.965606
RPL24	6.08968e-52	-0.0687473	-0.102859
EHBP1	6.55094e-52	0.200273	0.671874
CTSL	7.50796e-52	0.18768	0.289966
YAF2	1.31945e-51	0.217593	0.450684
PABPC1	1.61463e-51	0.144312	0.229354
LGALS1	1.66904e-51	-0.249298	-0.652861
GRHPR	1.82426e-51	-0.187199	-0.390542
SLC16A3	2.109e-51	-0.182752	-0.347618
TMEM5	2.34754e-51	0.216521	0.570406
RPA3	2.50116e-51	0.231032	0.421814
GGCT	2.85514e-51	-0.214175	-0.684722
PLATR10	3.01661e-51	-0.686773	-6.04379
SLC27A4	3.76967e-51	-0.220202	-1.53468
KLF9	3.7892e-51	-0.247816	-1.14331
SLMO1	4.37269e-51	0.148912	0.68915
CETN3	4.92668e-51	0.17106	0.30895
UTF1	7.86922e-51	-0.3903	-2.83328
POU3F1	2.34696e-50	-0.301246	-0.577369
RPL32	2.41305e-50	-0.0630258	-0.0914721
TTC32	2.64522e-50	-0.214837	-0.663741
PRELID1	3.21545e-50	-0.12452	-0.196984
RPL8	3.78733e-50	-0.0835807	-0.116873
RRBP1	4.37741e-50	-0.199184	-0.356308
HSP90AB1	4.97933e-50	-0.113068	-0.165238
TTC9	5.72411e-50	0.038731	1.42234
FOLR1	8.24824e-50	-0.430478	-3.83269
GLIPR2	1.16803e-49	-0.25344	-1.59925
HNRNPK	1.72672e-49	0.117008	0.180875
TRMT10C	2.3834e-49	0.219529	0.478601
FBXO32	2.66956e-49	0.0642275	1.15129
ENO1	3.57528e-49	-0.149628	-0.215134
TPI1	4.33347e-49	-0.108779	-0.156069
HNRNPDL	4.95961e-49	0.147997	0.241776
KIF5C	5.02833e-49	0.200839	0.477839
ELAVL1	5.36386e-49	0.159379	0.27234
TCEAL8	5.79748e-49	-0.167086	-0.296341
MARCKS	6.78201e-49	-0.171246	-0.262813
SERF2	6.79437e-49	-0.0947853	-0.149633
RSL24D1	7.30453e-49	0.179482	0.33814
TSC22D1	8.83403e-49	0.224823	0.405959
PTP4A1	8.88568e-49	0.189965	0.369402
FAT3	9.29651e-49	0.0364752	1.48613
CENPV	1.02913e-48	0.183755	0.605539
EPB41L4A	1.19349e-48	-0.262475	-1.12545
RPL34	1.66724e-48	-0.084981	-0.129852
KLHL9	1.68887e-48	0.207105	0.4825
CD9	1.87811e-48	0.232652	0.546523
PBX2	1.88236e-48	0.204688	0.413384
NFIB	1.88993e-48	-0.376979	-3.30371
FAM213A	2.30824e-48	-0.200438	-0.466699
SCG5	2.38205e-48	0.178794	0.720579
X2900011O08RIK	2.54729e-48	-0.252362
ZDHHC12	2.56098e-48	-0.221743	-0.784486
GM10260	3.0706e-48	-0.170617	-0.258983
TGS1	3.48808e-48	0.176325	0.335487
SHISA4	5.30684e-48	0.179829	0.597975
CLPB	5.52902e-48	-0.20981	-0.633438
CNKSR2	6.65956e-48	0.0845255	1.04421
OST4	6.94046e-48	0.163712	0.278808
PFN1	7.4575e-48	0.113375	0.178733
FAM136A	8.1048e-48	0.154088	0.249557
EID1	9.03638e-48	0.166667	0.284312
MYC	9.27281e-48	0.160803	0.778999
NSG1	1.42299e-47	0.156486	0.748265
NEFH	1.45658e-47	0.107531	0.968753
CYC1	1.63393e-47	-0.15536	-0.282268
FDX1	1.68937e-47	-0.216736	-0.882283
PJA1	1.80379e-47	-0.19977	-0.439623
PAM16	2.08719e-47	-0.173976	-0.365475
HN1L	2.4392e-47	0.194155	0.391252
TSPAN13	2.93983e-47	-0.218579	-0.489141
CAR3	3.03132e-47	-0.232137	-1.58807
TSPAN17	3.19406e-47	-0.572723	-5.31713
APOOL	3.29685e-47	0.185149	0.475184
POLR3K	5.11732e-47	0.16656	0.312591
PPP1R16B	5.81941e-47	-0.264441	-2.40308
CHD3	5.96323e-47	-0.247973	-0.61685
MRPL28	6.18425e-47	-0.14755	-0.249248
NCAM1	6.83117e-47	-0.24304	-0.811854
SPAG9	9.64704e-47	-0.224187	-0.557321
KITL	1.00863e-46	0.0603466	1.23443
GSTM7	1.20505e-46	-0.274942	-2.83229
CYTL1	1.24575e-46	0.0164169	2.04486
PCP4L1	1.2988e-46	-0.502553	-3.73637
CAPSL	1.49034e-46	-0.252936	-2.42767
USP51	1.62079e-46	0.214062	0.652634
GM3696	2.02174e-46	0.0130959	2.09675
RPL14	2.02174e-46	-0.0757319	-0.109657
VGLL3	2.27267e-46	-0.890506	-3.5293
DAAM1	2.37955e-46	-0.243775	-0.783445
ALCAM	2.86335e-46	-0.222974	-1.59971
YWHAE	4.71226e-46	0.0896485	0.136308
STRA6	4.9903e-46	-0.238178	-1.4082
LAPTM4B	5.57105e-46	-0.227851	-0.698009
CLDN3	5.75387e-46	-0.365898	-3.4833
JAKMIP1	6.64947e-46	-0.323666	-3.26189
MEG3	7.23356e-46	0.350829	0.512989
TFAP2C	8.37528e-46	-0.411211	-2.9743
SEMA6A	9.40703e-46	0.178084	0.761158
PRRX1	1.02778e-45	-0.233971	-1.56088
CABP7	1.32601e-45	-0.28547	-2.6171
GLS	1.50467e-45	0.255105	0.538033
NDNL2	1.81173e-45	0.211872	0.404007
SEMA3E	1.93321e-45	-0.353722	-2.41805
SCLT1	2.48995e-45	0.208153	0.515275
TXN1	2.58682e-45	0.109598	0.178541
BMYC	3.02083e-45	0.179527	0.349517
MAPK12	3.7612e-45	0.198222	0.529557
CDK14	6.34247e-45	0.157136	0.682009
DNMT3B	6.62159e-45	-0.276912	-0.465888
PRR36	7.47891e-45	0.0609924	1.07992
DOK5	8.47633e-45	0.0596651	1.18276
PARP1	9.63749e-45	-0.16218	-0.242501
RPL18A	1.00373e-44	-0.0744279	-0.107651
IQGAP2	1.3078e-44	-0.225629	-0.737691
SSB	1.39487e-44	0.117414	0.185476
HINT1	1.40736e-44	-0.11465	-0.172251
MAPK1IP1L	1.96037e-44	0.193231	0.389677
POLR2D	2.06216e-44	0.15604	0.284669
GJC1	2.28973e-44	0.230605	0.413543
RPL35	2.42335e-44	-0.15199	-0.22512
SPRY4	2.5077e-44	0.0281339	1.72333
SELENOI	2.5859e-44	0.202735	0.49038
RSL1D1	3.14416e-44	0.138505	0.210135
FBRSL1	4.19052e-44	0.175055	0.603445
TRIL	4.89384e-44	0.05919	1.06238
FZD4	6.76402e-44	0.06736	1.10299
TOP1	7.94994e-44	-0.107168	-0.156607
COX5A	8.06823e-44	-0.113623	-0.17897
HTATIP2	8.7466e-44	-0.2261	-2.22689
CDC42EP4	9.02411e-44	-0.209054	-1.04209
SALL4	9.03634e-44	-0.219744	-0.414128
PDCD2	1.13974e-43	0.184583	0.394147
SYTL2	1.17878e-43	0.012422	2.26958
ALPL	1.26824e-43	0.170193	0.69303
RPS20	1.38873e-43	-0.0698912	-0.107686
KLHL14	1.65665e-43	-0.281074	-2.40148
LRRFIP1	1.67813e-43	0.194001	0.494064
ANK3	1.68439e-43	-0.220182	-0.741484
FUBP1	1.70327e-43	0.123485	0.195518
LGALSL	1.86258e-43	-0.198537	-1.10487
GM9844	2.02083e-43	-0.196485	-0.448251
MEIS2	2.24714e-43	0.513067	0.438678
TRP53I11	2.44309e-43	-0.261878	-0.716425
RPL22	2.99238e-43	-0.0692613	-0.101274
SEPT3	3.51106e-43	0.233484	0.564595
AATF	3.5183e-43	0.184657	0.440899
FUT9	5.17688e-43	0.0526275	1.17032
NDUFS5	5.4097e-43	-0.128318	-0.224762
CFAP77	5.75318e-43	-0.282725	-2.57548
PPP1CA	5.89866e-43	-0.113253	-0.164884
EWSR1	6.13545e-43	0.153103	0.270377
PBX3	6.29293e-43	-0.189741	-0.483477
ZFP706	7.21376e-43	0.137143	0.219717
SMIM3	7.75927e-43	0.133065	0.760013
CTH	1.06777e-42	0.133073	0.634828
ILDR2	1.09123e-42	-0.116442	-0.330545
TCTEX1D1	1.18919e-42	-0.517508	-5.32735
PEAK1	1.40916e-42	-0.21681	-0.899254
RPS28	1.41201e-42	-0.113607	-0.167313
TRA2A	1.50454e-42	0.159975	0.275123
YWHAZ	1.81015e-42	0.15786	0.265826
DPM3	1.99491e-42	-0.178437	-0.404313
BATF3	1.99862e-42	0.0496295	1.18936
ANXA11	2.07171e-42	-0.204007	-1.81286
PTTG1	2.33327e-42	-0.179852	-0.352971
EBP	2.50354e-42	-0.207521	-0.632635
HMGN1	3.60024e-42	0.0740595	0.106532
TMEM251	4.40065e-42	0.160526	0.480493
YAE1D1	4.75111e-42	0.170252	0.323206
CYP51	5.67698e-42	0.184845	0.579775
BBC3	6.08425e-42	0.145047	0.643298
NOL7	6.22768e-42	-0.129609	-0.225031
BAZ2B	6.31821e-42	0.215474	0.477014
PIGX	6.66983e-42	0.16044	0.311566
TMEM107	6.80395e-42	0.185195	0.519947
TSFM	7.43812e-42	0.156362	0.308909
DAZAP2	8.45023e-42	0.177895	0.546321
GALNT1	1.10066e-41	0.237649	0.489
XIST	1.10066e-41	0.0846439	0.229034
BAG2	1.62847e-41	0.177307	0.44664
IFRD1	2.4602e-41	0.212573	0.446883
BBX	2.62293e-41	0.206708	0.400472
PLD5	3.3435e-41	0.0138358	2.1216
SSSCA1	3.64019e-41	-0.176101	-0.326496
GTPBP10	3.64821e-41	0.17164	0.535397
RPS5	3.96359e-41	-0.074333	-0.110295
MAX	4.00633e-41	0.201815	0.464172
FAM78B	4.05209e-41	0.0526116	1.09048
TSPO	4.13345e-41	-0.204737	-0.57949
ANO1	4.73519e-41	-0.241463	-2.22639
NBL1	5.05922e-41	-0.224852	-2.05346
MSI2	5.70378e-41	0.218063	0.432243
TGIF2	5.79991e-41	0.194458	0.483919
TUBB3	6.28894e-41	0.256205	0.568249
GALNT7	6.76214e-41	-0.223275	-0.686067
IFITM3	7.54945e-41	-0.246046	-0.751906
MLLT11	7.79024e-41	0.148133	0.660537
PCNP	8.51274e-41	0.166871	0.31155
DQX1	8.98648e-41	-0.320571	-1.21632
X2700038G22RIK	9.34502e-41	0.199355
PKNOX2	1.01861e-40	-0.214897	-0.770435
SMS	1.09322e-40	0.188863	0.298011
SMARCD1	1.17471e-40	-0.164777	-0.305147
MKRN3	1.26734e-40	0.115119	0.811796
SPINK2	1.31717e-40	0.0319816	1.42841
NKX2-9	1.34892e-40	-0.534879	-2.205
RPS15	1.51113e-40	-0.0771448	-0.110643
TMOD2	1.52054e-40	0.136548	0.646923
GM28151	1.6126e-40	0.020293	1.86371
HNRNPH2	2.22577e-40	0.16285	0.32013
PSMD14	2.25873e-40	0.143048	0.245033
ENPP2	2.45292e-40	-0.500901	-3.52601
CXX1A	2.79568e-40	-0.208503	-0.625872
PLPP3	3.79753e-40	-0.227666	-0.734009
UBE2B	3.86285e-40	0.14896	0.272672
EIF1A	4.77526e-40	0.161206	0.294802
ACADL	4.96053e-40	-0.204874	-0.737285
MARCH9	5.17701e-40	0.174355	0.492335
PTPRN2	5.21938e-40	0.0607024	1.09688
FAM216A	6.55652e-40	0.192347	0.440489
TSNAX	8.13784e-40	0.177591	0.389313
PDGFRA	8.38001e-40	-0.222277	-1.54875
TTC9C	8.41364e-40	0.174458	0.416985
UBE2M	8.50575e-40	-0.120991	-0.199825
TUBB2A	8.55218e-40	-0.199852	-1.02545
CKAP4	8.80731e-40	-0.172117	-0.434573
WNT3	9.47984e-40	-0.39295	-4.29585
NDUFA13	1.09082e-39	-0.128414	-0.213118
GRIK2	1.12709e-39	0.00620501	2.60142
KHDRBS3	1.18084e-39	0.204314	0.399402
ATP13A3	1.30136e-39	0.194764	0.443031
SENP3	1.72249e-39	0.215338	0.463962
CLCN5	2.25411e-39	0.198053	0.553431
EIF3K	2.25411e-39	-0.118297	-0.182345
PRDM5	2.32687e-39	0.13767	0.561414
KLF13	2.38795e-39	-0.197184	-0.513311
RRS1	2.4774e-39	0.156166	0.284285
EEF1AKMT1	2.81237e-39	-0.164301	-0.351119
FLRT3	2.95429e-39	0.281155	0.485017
ABLIM1	3.17043e-39	0.186596	0.634078
NEDD4	3.57409e-39	0.134693	0.216875
NUMA1	3.73949e-39	-0.22612	-0.570948
MT1	4.6871e-39	0.154654	0.57333
IFNGR1	4.86584e-39	-0.188257	-1.84864
NAP1L1	5.09484e-39	0.0806755	0.119048
MRPL4	5.42857e-39	-0.165155	-0.393339
ZFP280C	5.64127e-39	0.192283	0.485936
CBY1	5.831e-39	-0.170879	-0.392792
LHX5	6.01611e-39	0.164371	0.507034
TCF12	7.20013e-39	0.243095	0.415092
RNF219	7.58272e-39	0.17448	0.372611
RHOBTB3	8.26958e-39	0.191035	0.362308
HEG1	9.11465e-39	0.0727634	0.945479
HIST1H4H	1.09887e-38	-0.217779	-0.967402
HMGB3	1.10386e-38	0.129833	0.213332
FLNA	1.12815e-38	-0.222435	-0.485337
ROMO1	1.19952e-38	-0.14141	-0.247535
GCAT	1.24013e-38	-0.193604	-0.491262
RPL27A	1.35761e-38	-0.0540661	-0.0799579
SOX21	1.49944e-38	-0.22809	-0.51777
SARNP	1.60859e-38	0.149557	0.263318
ZYX	1.78584e-38	-0.202751	-0.561004
LDHB	1.84109e-38	0.293344	0.452456
PFDN2	2.00474e-38	0.139131	0.229191
IMMP1L	2.55793e-38	0.158608	0.307032
MEX3A	2.67483e-38	0.20229	0.390883
MBTD1	2.74674e-38	0.176859	0.349503
FABP3	3.02831e-38	-0.176949	-1.29037
PPM1N	3.26236e-38	0.0606116	0.964601
HACE1	3.4699e-38	0.124408	0.671871
GPN3	3.77991e-38	0.169335	0.380486
PKDCC	4.11757e-38	0.246339	0.509501
FREM1	4.25215e-38	-0.239828	-1.98895
GSC	4.80403e-38	-0.374525	-2.42666
ABCB6	5.30521e-38	-0.178646	-1.22406
CTBP2	5.60238e-38	-0.178127	-0.411958
NDUFB10	6.36898e-38	-0.144421	-0.277085
SOX12	6.69797e-38	0.202148	0.458939
LHFPL2	7.44274e-38	-0.196311	-1.8191
ZFP280D	7.91173e-38	0.189888	0.387258
SH3GLB1	8.13571e-38	0.194488	0.393804
NUAK1	8.58293e-38	-0.22737	-1.27977
DDT	9.15958e-38	-0.144113	-0.275443
GATM	1.00311e-37	0.099436	0.779326
MSRB1	1.09369e-37	-0.190062	-0.613513
SOX14	1.12504e-37	0.0064498	2.66608
RHOBTB1	1.25059e-37	0.046917	1.09704
FRZB	1.25474e-37	0.103605	0.81888
TMEM82	1.29927e-37	-0.189615	-1.78288
FBXL14	1.37765e-37	0.173726	0.456367
DSP	1.67925e-37	-0.193156	-1.34253
TMED2	1.81771e-37	0.152988	0.263347
ZIK1	1.89461e-37	0.140361	0.565416
MIS18A	2.06703e-37	0.171764	0.39081
HOMER3	2.17211e-37	0.156196	0.563654
TCEB2	2.19606e-37	-0.0931055	-0.149741
X4930503L19RIK	2.30662e-37	0.168815
BST2	2.31934e-37	-0.203584	-0.68116
AMMECR1	2.46657e-37	0.175372	0.479104
PIGK	2.47088e-37	0.0947838	0.591537
SLC2A3	2.83622e-37	-0.200757	-0.324027
EBNA1BP2	3.03759e-37	0.138181	0.203066
AK5	3.42453e-37	0.00958672	2.27723
TULP4	3.67885e-37	0.193487	0.473495
TRABD2B	4.36298e-37	-0.207987	-1.59131
KLHL22	4.49222e-37	0.124962	0.666088
EFEMP2	4.64217e-37	-0.176465	-1.29037
PPAT	4.80462e-37	0.149237	0.265026
BTRC	5.56233e-37	-0.185067	-0.737307
GM5786	5.56356e-37	0.190684	0.493774
LMX1A	5.64085e-37	-0.452382	-4.39289
GM9493	5.70887e-37	0.132588	0.217404
ITGA6	5.74661e-37	-0.221386	-0.64037
GM10036	6.07567e-37	0.158645	0.290937
XYLT1	6.36429e-37	0.0480071	1.11203
TAB2	6.4388e-37	0.202519	0.437378
FEZ1	6.46479e-37	-0.173496	-0.79728
LLGL2	6.61059e-37	-0.196608	-1.58857
HNRNPL	6.80397e-37	0.152651	0.265079
ARHGAP24	6.96569e-37	-0.200026	-1.41736
X2610028E06RIK	7.38183e-37	-0.347802
VANGL2	7.51853e-37	-0.188171	-0.454748
DHRS3	7.81978e-37	-0.408607	-4.28511
BCAS2	8.69619e-37	0.12257	0.204905
YWHAB	8.92827e-37	0.118053	0.204066
AMT	9.20855e-37	0.143253	0.582808
LZIC	9.99246e-37	0.151158	0.507835
CX3CL1	1.08296e-36	-0.249881	-2.74426
ZFP36L2	1.22201e-36	-0.218698	-0.716374
NDUFA1	1.30591e-36	0.148998	0.27134
MDK	1.4519e-36	0.13029	0.19622
NME5	1.51991e-36	-0.223271	-2.53446
COX6A1	1.57731e-36	-0.128375	-0.214162
ARL6IP5	1.75729e-36	-0.178866	-0.722196
RASGRP2	1.8573e-36	-0.094829	-0.30374
CTNNB1	1.98734e-36	0.130236	0.218067
GM26578	2.13563e-36	0.00729821	2.5096
CNPY2	2.61483e-36	-0.142553	-0.267745
ARPC1B	2.77258e-36	0.120779	0.419707
HOXA3	2.78159e-36	-0.592746	-6.0189
TRIB2	3.37259e-36	-0.19597	-1.01721
KRAS	3.74244e-36	0.152675	0.285588
GMFG	4.38287e-36	-0.185842	-1.04116
PCED1B	4.88242e-36	-0.178194	-2.04283
TVP23B	5.27433e-36	0.165617	0.431055
EXOC5	5.55732e-36	0.197539	0.499428
SKAP2	5.94934e-36	-0.196515	-0.747159
HPF1	5.98653e-36	0.129162	0.212331
PLTP	5.98653e-36	-0.1864	-1.25681
FZD9	6.06623e-36	-0.176678	-1.2013
UBE2N	6.10866e-36	0.121316	0.207746
GKAP1	7.67376e-36	0.177347	0.357616
ATP5O	7.8821e-36	-0.126103	-0.203107
RASL11A	8.32364e-36	0.186353	0.4469
NAA50	9.28112e-36	0.146475	0.269551
SAP30	9.62073e-36	0.17329	0.32446
PAX3	9.73043e-36	-0.338332	-1.09909
RPS19	1.21878e-35	-0.0670957	-0.094625
TMEM2	1.22799e-35	-0.212972	-0.66379
NHP2L1	1.2456e-35	0.0991034	0.154649
EYA1	1.26289e-35	0.0584988	1.0749
SFRP1	1.30717e-35	0.281213	0.386221
PMAIP1	1.30717e-35	-0.184454	-1.20558
BLVRA	1.31384e-35	-0.168769	-1.84956
ATOX1	1.54953e-35	-0.125423	-0.241941
SLC7A7	1.70014e-35	-0.225969	-2.28371
CIRH1A	2.02678e-35	0.161917	0.38302
RPS11	2.09923e-35	-0.0610297	-0.0935923
HDGF	2.21043e-35	0.10599	0.175863
GM2000	2.21228e-35	0.132887	0.220953
ZKSCAN3	2.34235e-35	0.19908	0.421603
UBR2	2.45429e-35	-0.193595	-0.539095
EPB41L4AOS	2.76306e-35	-0.160787	-0.348502
TTC3	2.85485e-35	0.14357	0.24713
LRRC1	3.10009e-35	0.0877992	0.57988
DPYSL2	3.32815e-35	0.197178	0.434901
GM12827	3.72095e-35		-24.8006
CCDC28B	3.8379e-35	-0.181961	-0.512566
X1700025G04RIK	4.07962e-35	-0.196282
NR3C1	4.11372e-35	0.0156308	1.80419
GMPR	4.20723e-35	-0.181761	-1.78446
GNAS	4.21223e-35	0.105023	0.164394
GRHL3	4.37523e-35	0.00497025	3.28191
NDUFB2	4.55947e-35	-0.156342	-0.362551
TOMM7	4.70318e-35	-0.121318	-0.18609
FGF18	4.90595e-35	-0.320063	-2.67509
RGS17	4.91454e-35	0.0673036	0.906158
NDUFA7	5.10086e-35	-0.106322	-0.180928
DOCK7	5.11529e-35	0.185099	0.435172
ETFA	5.33904e-35	-0.189246	-0.560436
UQCRQ	6.12108e-35	-0.125647	-0.189433
RCN3	6.33962e-35	-0.188847	-0.550489
E2F6	6.52902e-35	0.166396	0.466912
MBIP	8.21197e-35	0.156138	0.445682
HOXB4	8.57227e-35	-1.25137	-7.25753
LMO4	1.00758e-34	-0.186267	-0.358427
NPAS1	1.02075e-34	0.0186222	1.83423
ELMOD1	1.0715e-34	-0.293649	-3.4849
ZFP608	1.08425e-34	0.224539	0.479534
COL9A2	1.12325e-34	0.0365083	1.3128
PPID	1.13166e-34	0.129375	0.209298
CIAPIN1	1.16193e-34	-0.138142	-0.252095
RRAGB	1.16544e-34	0.196829	0.571624
FAM19A2	1.23232e-34	0.00836439	2.39754
ARFGEF1	1.31623e-34	0.176412	0.489866
INIP	1.42282e-34	0.178137	0.406544
POLR2C	1.45548e-34	-0.12737	-0.240699
FGFR2	1.45811e-34	-0.2199	-0.605847
RIMS1	1.79898e-34	0.021305	1.50157
DYNC1H1	1.83594e-34	-0.212183	-0.50056
BCCIP	2.2447e-34	0.149794	0.285513
ZFP329	2.27517e-34	0.187815	0.429335
CLNS1A	2.38226e-34	0.118939	0.204632
MRPL57	2.41464e-34	-0.14372	-0.307748
ANXA4	2.4152e-34	-0.181459	-1.80915
X4930447C04RIK	2.44168e-34	0.0414368
POLR2I	2.72365e-34	-0.135129	-0.244372
IRAK1BP1	2.76894e-34	0.158409	0.349794
TTC14	2.83118e-34	0.16646	0.30984
RABAC1	2.90741e-34	-0.180608	-0.510937
NIP7	3.22965e-34	0.141411	0.252196
TMTC2	3.30624e-34	0.0513609	0.924018
TUBA4A	4.08969e-34	-0.173524	-1.66737
GPRC5C	4.31815e-34	-0.201476	-0.704759
SRGAP3	4.32976e-34	-0.191063	-0.796105
ETFB	5.02333e-34	0.165776	0.333921
MYEOV2	5.45849e-34	-0.128587	-0.229285
TMED1	5.99464e-34	-0.159423	-0.401668
SEH1L	6.37056e-34	0.144288	0.283754
THSD4	6.44705e-34	-0.186161	-2.1939
IGF2BP3	6.53674e-34	0.153007	0.276642
MTAP	8.32762e-34	0.157548	0.302638
NDUFAF3	8.45146e-34	-0.177801	-0.504919
DCLK1	1.02766e-33	0.0786379	0.843084
RUFY3	1.12836e-33	0.153875	0.622985
SEMA3C	1.20715e-33	-0.209496	-1.80476
CCDC112	1.20785e-33	0.144668	0.469765
COL23A1	1.22458e-33	-0.17322	-1.5579
PSAP	1.44886e-33	-0.178341	-0.472807
MRPL50	1.47028e-33	0.135518	0.279155
BCL11A	1.50424e-33	-0.245819	-2.98856
NIPSNAP3B	1.61404e-33	0.163725	0.376252
LMO7	1.76596e-33	-0.160559	-1.53469
ADAMTS9	1.85558e-33	0.0926544	0.79285
ZFP462	1.85573e-33	0.201181	0.401136
ADGRB2	1.87768e-33	-0.159591	-1.44346
SLC24A5	2.00408e-33	0.198857	0.363173
C030018K13RIK	2.061e-33	0.0250316	1.53376
CFC1	2.11236e-33	-0.5897	-5.66731
GUCA1A	2.13193e-33	-0.161205	-1.49157
PPP4C	2.22638e-33	0.158341	0.310559
TUBA1B	2.29615e-33	0.106053	0.174783
MZT1	2.30509e-33	0.182422	0.449334
MAGED1	2.54021e-33	0.16573	0.328035
GFRA3	3.01275e-33	-0.525777	-5.3343
RBM15	3.22214e-33	0.189798	0.490444
GNGT2	3.32974e-33	-0.166502	-1.0542
DNAJC19	3.57943e-33	-0.136304	-0.239474
EDNRB	4.40052e-33	-0.217422	-2.4246
MTPN	5.0682e-33	0.153401	0.297364
IL17D	5.24606e-33	-0.174025	-1.62214
MOB3B	5.42974e-33	-0.165018	-0.792827
HIGD1A	5.43656e-33	-0.125044	-0.194605
TOP2B	6.06423e-33	0.185371	0.383831
RPS18	6.08074e-33	0.069552	0.107322
GLI1	6.1025e-33	-0.177922	-1.54239
TSPAN3	6.5182e-33	0.139535	0.251186
GM6792	6.5182e-33		-24.9523
NEDD9	6.53849e-33	-0.19558	-1.7726
UBE2H	7.05003e-33	0.149585	0.54718
GART	8.01571e-33	0.129504	0.21749
SLC38A8	8.03621e-33	0.00422601	2.70731
GNG2	8.29566e-33	0.200255	0.432426
MRPS30	8.464e-33	0.137037	0.299099
BIN1	9.40064e-33	0.154803	0.382277
ASH1L	1.00903e-32	0.168914	0.405062
ATP5J	1.09733e-32	-0.0886296	-0.133198
PTN	1.13949e-32	-0.279594	-0.414509
PCNA	1.1896e-32	0.164028	0.308031
ZFP629	1.24555e-32	0.112982	0.640881
GNB1	1.34133e-32	0.120126	0.212561
MIB1	1.40412e-32	0.176534	0.489312
FAM178A	1.4272e-32	0.161204	0.406189
SNN	1.56222e-32	0.161717	0.459419
RPS9	1.56263e-32	-0.0779393	-0.112176
X4933434E20RIK	1.69719e-32	0.174308
CCNYL1	2.08561e-32	0.109382	0.60987
GAL	2.21105e-32	-0.367928	-3.31232
KCNA1	2.26066e-32	-0.361713	-3.10058
TPD52	2.3094e-32	0.134397	0.442933
MAFB	2.31739e-32	-0.412909	-2.39717
FUNDC2	2.55538e-32	-0.155968	-0.361192
TMTC4	2.61358e-32	0.100569	0.710252
RANBP9	2.82142e-32	0.119462	0.44731
PIAS2	2.94052e-32	0.168027	0.491687
FAM195A	3.06082e-32	0.107888	0.492153
ST6GAL2	3.07455e-32	0.0442642	1.03513
HSP90AA1	3.08882e-32	-0.117222	-0.159399
IGDCC4	3.25314e-32	-0.193482	-2.2889
CXXC4	3.25759e-32	0.132227	0.680702
MYT1L	3.26674e-32	-0.346861	-4.03519
PSME2	3.36942e-32	0.154105	0.321
CRYBG3	3.48933e-32	-0.166681	-1.69096
COL4A2	4.54397e-32	-0.170426	-0.860562
ZFP148	4.57407e-32	0.162382	0.45642
H2-D1	5.15677e-32	0.171395	0.455929
POU3F4	5.37013e-32	-0.227746	-1.93163
RAD23B	5.45799e-32	0.136446	0.253486
AKAP17B	5.83071e-32	-0.174056	-0.785681
TCTEX1D2	6.2588e-32	0.151334	0.375995
DDN	6.76399e-32		-24.74
MTSS1	7.02924e-32	-0.200001	-0.611191
X2610507B11RIK	7.05952e-32	0.163113
X5730596B20RIK	7.14963e-32	-0.693903
HSPBAP1	7.64179e-32	0.132513	0.502515
LACTB2	8.01397e-32	0.134121	0.478836
RIC8B	8.90516e-32	-0.176585	-0.683351
GNAI1	9.91931e-32	0.113581	0.66059
RNF187	1.03778e-31	-0.127436	-0.216852
SPR	1.06381e-31	-0.163303	-0.418927
CTNND2	1.08732e-31	0.0557494	0.972851
GM10020	1.12908e-31	-0.191956	-0.493379
GPX4	1.17648e-31	-0.127565	-0.199041
R3HDM4	1.20702e-31	0.157367	0.361306
PPP1R3G	1.40356e-31	-0.146331	-1.20278
RALBP1	1.73152e-31	-0.147378	-0.344874
RPL30	1.80319e-31	-0.0610867	-0.0935585
SLC16A13	1.80319e-31	-0.165462	-0.848626
LDB1	2.09652e-31	0.172687	0.383092
UNC5C	2.49727e-31	-0.256084	-2.79122
TUBA1C	2.87813e-31	0.18647	0.421032
R3HDM1	4.43835e-31	0.166571	0.336138
DTNA	4.57371e-31	0.0512474	1.05314
ST14	5.39179e-31	-0.252298	-3.26794
EIF1AX	6.56947e-31	-0.101523	-0.149804
MAGED2	6.64485e-31	0.138976	0.410234
SNHG6	6.76584e-31	0.18217	0.360403
FIS1	9.74815e-31	-0.121104	-0.200133
TLE2	9.84721e-31	-0.186363	-2.36246
SMIM10L1	9.98517e-31	0.169369	0.419346
ECSCR	1.04349e-30	0.0386806	1.11425
DCK	1.23097e-30	0.160944	0.419432
TFG	1.23268e-30	0.13923	0.277296
MARCH7	1.26187e-30	0.160627	0.334788
UBE2D1	1.27241e-30	0.150032	0.30191
ARHGEF26	1.27365e-30	-0.17053	-0.990321
BTF3	1.37618e-30	0.0730185	0.112934
PDZD8	1.48437e-30	0.128171	0.36174
BHLHB9	1.48882e-30	0.158281	0.396037
BMP7	1.71087e-30	0.0794917	0.798527
ORMDL1	1.79853e-30	0.16339	0.411511
IGSF9	1.88749e-30	0.15292	0.509695
PKIG	2.67088e-30	0.141191	0.268991
HSD17B12	2.68123e-30	0.139541	0.278823
MAD2L1	3.07311e-30	0.142154	0.298963
DST	3.08672e-30	-0.209856	-0.478847
NTRK2	3.22362e-30	-0.182952	-1.41299
CUX1	3.46012e-30	0.158472	0.382483
MEX3C	3.47197e-30	0.151055	0.495534
SOCS4	3.63232e-30	0.139865	0.54158
ARHGEF28	3.68395e-30	-0.175967	-1.68141
RRP15	3.84054e-30	0.128842	0.238929
SRP9	4.21879e-30	0.132202	0.241429
MEX3D	4.30889e-30	0.151056	0.465456
ERICH2	4.776e-30	-0.207493	-2.58408
LRIG3	4.85939e-30	0.151241	0.554647
GSTK1	5.04428e-30	-0.141346	-1.46726
CHD3OS	5.38569e-30	0.149428	0.447161
MT-ND6	5.42814e-30	0.229081	0.439748
ZFP760	5.55196e-30	0.137846	0.564713
WHSC1	6.48167e-30	0.167565	0.312106
SQLE	6.51454e-30	0.14606	0.386109
LRRC4B	6.51454e-30	0.0752414	0.749807
SOCS2	6.64552e-30	-0.208416	-0.49738
LGI1	7.44641e-30	-0.288425	-3.22769
SEPT2	7.73332e-30	0.163546	0.331734
CACHD1	8.12649e-30	-0.191472	-0.527897
ICK	8.68478e-30	0.151015	0.467214
POLR2M	9.16858e-30	0.11516	0.177475
SF3B5	9.2188e-30	0.101713	0.168852
ZFP800	9.43082e-30	0.142575	0.570239
MFSD14A	9.66378e-30	0.153234	0.412022
MID1	9.68085e-30	0.200549	0.460454
TUBB5	9.80331e-30	0.0773964	0.118817
TRP53	1.00364e-29	0.12676	0.237247
MAFG	1.10155e-29	0.166475	0.372745
KLHDC2	1.17189e-29	0.121555	0.214079
ACTR3	1.33145e-29	0.130726	0.24891
SP8	1.36747e-29	0.131292	0.387448
CLEC2L	1.3768e-29	-0.183336	-1.44696
N4BP3	1.41718e-29	-0.151805	-0.903206
EMG1	1.43984e-29	0.113433	0.175835
CXXC5	1.54852e-29	-0.193108	-0.522015
BC024139	1.66229e-29	-0.220048	-2.67631
RHBDL3	1.80516e-29	-0.202592	-2.83395
B230354K17RIK	1.84211e-29	0.154595	0.480795
TDRKH	2.1303e-29	0.124575	0.606962
NDUFA10	2.4427e-29	-0.131455	-0.246513
COQ4	2.49567e-29	-0.158674	-0.440076
ZSCAN10	2.5525e-29	-0.17769	-0.839291
RNF113A1	2.55781e-29	0.0960543	0.479796
VAMP3	2.69577e-29	0.147912	0.305213
COPS7A	2.87818e-29	0.131734	0.289001
MSX1	2.87818e-29	-0.259554	-1.24632
CACNA1G	3.3521e-29	-0.157477	-1.1442
SLC12A2	3.5359e-29	0.124562	0.532061
PAM	3.61985e-29	0.15031	0.533027
PPP1R14B	4.0257e-29	-0.0847139	-0.125837
YTHDF2	4.17884e-29	0.140194	0.272175
LPCAT4	4.53936e-29	0.0539815	0.906855
NMD3	5.05405e-29	0.129985	0.27363
UNC5A	5.28159e-29	0.00854726	2.0248
DYNLL1	5.56963e-29	-0.0888056	-0.131626
SHF	6.18783e-29	-0.170768	-0.63065
DCUN1D1	6.86836e-29	0.171593	0.371876
FGF15	6.87057e-29	-0.223127	-0.726604
AHI1	7.07355e-29	0.155253	0.375126
G3BP1	7.24036e-29	0.110506	0.19226
KTI12	7.52471e-29	0.141717	0.304653
WNT16	7.57406e-29	0.0126208	2.07593
ZC2HC1A	7.57969e-29	0.123133	0.488559
SOX4	7.85088e-29	0.158358	0.257832
SPTSSA	8.55361e-29	0.137802	0.264024
TCAF1	8.94246e-29	0.181467	0.42687
COL4A1	8.99242e-29	-0.175794	-0.48881
SIKE1	9.05908e-29	0.14306	0.33495
PNO1	9.20409e-29	0.126573	0.235533
FAM96A	9.69504e-29	0.150575	0.294587
GMFB	9.74395e-29	0.158804	0.361787
SMCO4	1.09223e-28	0.157751	0.329675
SLAIN1	1.14836e-28	0.0978153	0.654436
COX6C	1.17891e-28	-0.0812333	-0.122954
FAM204A	1.33874e-28	0.125308	0.266736
RBM3	1.41706e-28	0.103316	0.16553
LIX1L	1.474e-28	0.102325	0.673675
ARX	1.55044e-28	0.0406039	0.78888
TMEM38B	1.59405e-28	0.108527	0.555334
CDK2AP1	1.60898e-28	0.123884	0.217183
RPP30	1.82315e-28	0.141782	0.291645
CASZ1	1.86351e-28	-0.188842	-1.43295
PCDH8	1.88285e-28	-0.204168	-1.51957
SMIM14	1.96411e-28	0.171376	0.476056
ADGRB1	1.96411e-28	-0.143395	-1.56432
SPOCK2	2.13642e-28	-0.153233	-1.88794
KRR1	2.2087e-28	0.133514	0.282526
RAB3IP	2.88028e-28	-0.153143	-0.3851
PYCARD	2.96436e-28	-0.171186	-0.769107
POR	3.01631e-28	-0.169611	-0.532899
HCK	3.04881e-28	-0.270127	-3.18109
MAPK13	3.07695e-28	-0.149003	-1.38627
EFNA2	3.10644e-28	-0.199182	-0.545854
LHPP	3.12649e-28	-0.176223	-0.610194
ALDOA	3.33832e-28	-0.0821771	-0.121012
FAM49B	3.3904e-28	0.145972	0.28318
B4GALNT1	3.55396e-28	0.0550967	0.889041
PRPSAP1	3.58236e-28	-0.144918	-0.357435
SLC18A3	3.83743e-28	0.0056229	2.62677
IDH1	4.01492e-28	0.125129	0.568899
DAD1	4.09449e-28	-0.104935	-0.196118
UCHL3	4.24955e-28	0.121664	0.218043
UBE2E1	4.59936e-28	0.136453	0.269608
GM8186	4.77841e-28	-0.134179	-0.232996
DIMT1	4.92775e-28	0.135465	0.326006
EGR2	5.00507e-28	-0.57466	-3.65285
PTPRD	5.41947e-28	0.06319	0.87539
IRS2	5.61744e-28	-0.166278	-0.567393
SYNCRIP	6.01526e-28	0.13058	0.22768
FUBP3	6.03821e-28	0.159981	0.373079
SLC25A36	6.07238e-28	0.159645	0.46668
OSTC	6.16302e-28	0.110817	0.181181
GM12166	6.23437e-28	0.108029	0.554945
F2RL1	6.54312e-28	-0.199239	-5.35815
SNRPD2	6.74092e-28	-0.0804498	-0.120919
TMEM243	6.75614e-28	0.151235	0.427687
ACKR3	6.824e-28	-0.158747	-1.33167
MYL9	7.13501e-28	-0.151464	-0.823237
MEAF6	7.4583e-28	0.140572	0.286708
GPATCH4	7.90494e-28	0.138774	0.264178
EIF3C	8.22611e-28	-0.0926775	-0.141039
SLC6A13	8.71631e-28	-0.216613	-3.07705
SIK1	9.25722e-28	0.0520035	0.886932
CKAP5	9.95227e-28	0.159002	0.312112
CACNG4	1.10439e-27	-0.185426	-0.655035
EFCAB6	1.12924e-27	-0.172338	-2.47204
RERG	1.1514e-27	-0.200845	-2.99259
BASP1	1.21687e-27	-0.153171	-0.244878
MTCH1	1.29047e-27	0.126714	0.231411
UCHL5	1.30989e-27	0.135073	0.276856
PKIA	1.34005e-27	0.105754	0.62936
SLC13A4	1.58528e-27	0.0429175	0.796024
KIZ	1.624e-27	0.0941469	0.587684
RFX7	1.8453e-27	0.171651	0.40904
MTA1	1.89338e-27	0.135681	0.271537
P4HA1	2.17217e-27	0.188154	0.389967
ALAD	2.17217e-27	0.136524	0.292136
SCRN1	2.68585e-27	-0.151442	-1.14461
WSCD1	2.70219e-27	0.0980616	0.346742
PPL	2.95319e-27	-0.383686	-4.15583
SRI	3.12837e-27	0.17172	0.385569
SNHG11	3.39865e-27	0.178726	0.43613
NAA20	3.4824e-27	0.132077	0.264481
CFAP20	3.52497e-27	0.12492	0.230056
NUDT11	3.81493e-27	0.092574	0.553017
ARPC1A	4.04757e-27	0.117333	0.208021
PPME1	4.12251e-27	-0.147582	-0.346678
RNF6	4.30061e-27	0.145622	0.404179
KRIT1	4.69609e-27	0.170963	0.354446
RAB11FIP2	4.72822e-27	0.116258	0.45025
RC3H2	4.841e-27	0.164145	0.397508
TMEM35A	5.18502e-27	-0.172192	-2.34831
RPS26	5.59263e-27	-0.0586742	-0.0845592
CEBPG	5.6343e-27	0.139154	0.330386
EEF2K	5.88224e-27	-0.14118	-1.05002
ANKRD45	5.96418e-27	0.0456917	0.850155
OCIAD2	6.07659e-27	0.0855343	0.65822
PRKD1	6.23874e-27	0.0474948	0.890915
MEMO1	7.22236e-27	0.146163	0.340515
RAD23A	8.02108e-27	0.13186	0.294445
ANTXR1	8.48708e-27	-0.141857	-2.04445
GMPS	9.36851e-27	0.114972	0.198848
UBE2D3	1.01011e-26	0.101519	0.168995
RPL27	1.01934e-26	0.100331	0.167283
POLR1D	1.01934e-26	0.0958975	0.165884
PLCD4	1.07779e-26	-0.188245	-2.64327
CD63	1.08003e-26	0.138275	0.288151
GM11627	1.12821e-26	-0.155908	-0.778007
PRR5	1.15212e-26	-0.133498	-0.915455
PRKRA	1.1671e-26	0.125515	0.242744
ENDOG	1.19874e-26	-0.158701	-0.543331
LOCKD	1.39007e-26	-0.156012	-0.701673
SMC2	1.51043e-26	0.116106	0.223145
PNPT1	1.54062e-26	0.132806	0.415619
ZFP553	1.71279e-26	0.148104	0.319732
LIPG	1.71279e-26	0.0188071	1.47123
CALR	1.724e-26	-0.129939	-0.2021
TRP53INP1	1.76889e-26	0.0575877	0.931121
PCBP4	1.76911e-26	-0.118344	-0.216251
ATAD1	1.79698e-26	0.136674	0.325379
X9030622O22RIK	1.84512e-26	-0.621504
DBF4	2.25788e-26	0.146926	0.285821
ETNK1	2.32433e-26	0.155942	0.426499
CDK7	2.32555e-26	0.135572	0.281239
KLF3	2.65425e-26	0.202425	0.453636
UBXN7	2.72385e-26	0.146283	0.457416
BPNT1	2.7259e-26	0.102321	0.517843
PICALM	2.76828e-26	0.142689	0.361168
PGM1	3.5219e-26	0.101684	0.478754
FAM110B	3.53941e-26	0.0874792	0.604955
KMT5A	3.77658e-26	0.124277	0.227534
RPP21	3.82358e-26	-0.135137	-0.331892
NME2	3.90863e-26	0.110149	0.560525
SERINC2	4.00561e-26	0.0943647	0.554604
TXNDC17	4.1412e-26	0.102461	0.160199
INPPL1	4.30468e-26	-0.163628	-0.470682
NAT8L	4.35407e-26	0.0665714	0.7713
PDCD6	4.54115e-26	0.120459	0.233362
SNCA	4.61695e-26	0.0185376	1.35511
TOMM70A	4.76398e-26	0.130577	0.244422
X1700017B05RIK	4.94471e-26	0.0775416
AKAP13	5.26681e-26	0.174059	0.420453
TIA1	6.12074e-26	0.151076	0.28626
COL1A2	6.18628e-26	0.0581003	0.820893
X2510002D24RIK	6.36265e-26	-0.153181
LPP	6.65916e-26	0.0713447	0.778716
CADM1	6.71398e-26	0.165599	0.322198
BNIP2	6.71398e-26	0.136357	0.281172
AK6	6.73007e-26	0.116297	0.203977
HIST1H1B	7.09661e-26	-0.315266	-0.533805
SLITRK2	7.23649e-26	-0.159423	-2.0328
SLC25A37	7.8979e-26	0.106578	0.518831
APPBP2	7.963e-26	0.150578	0.321351
PABPC4	8.0771e-26	0.132479	0.283946
PMF1	8.24105e-26	-0.12751	-0.256993
GM9843	8.49557e-26	-0.0937304	-0.152521
ADGRL1	9.00306e-26	0.128427	0.452155
CTPS2	9.02299e-26	-0.137212	-0.782452
ASRGL1	9.13948e-26	0.130095	0.363688
FXYD7	9.14576e-26	-0.145752	-1.61348
SLIT1	9.66022e-26	-0.294701	-4.29697
PLXNA2	9.79099e-26	-0.193905	-0.736534
RPL11	9.9529e-26	-0.0579981	-0.0863329
ISG20L2	1.10858e-25	0.160796	0.393983
PYCR2	1.21433e-25	0.126528	0.2702
CDC26	1.23542e-25	0.114043	0.203202
TCFL5	1.33585e-25	0.158304	0.385592
DYRK3	1.40327e-25	0.134717	0.444414
PSMA5	1.59953e-25	0.100562	0.141677
PIKFYVE	1.68332e-25	0.125988	0.484302
PSPC1	1.73782e-25	-0.147749	-0.338461
MAP4K4	1.76592e-25	0.155935	0.281437
NUFIP2	1.7682e-25	0.135163	0.29011
AP2S1	1.79051e-25	-0.114556	-0.233748
CDCA8	1.79608e-25	-0.127142	-0.189719
NEXN	1.80564e-25	0.0757826	0.833211
SEMA5A	1.83463e-25	0.0561448	0.762071
DNAJC2	1.84872e-25	0.105499	0.180293
SREK1	1.90879e-25	0.122406	0.221059
FGFBP3	1.9933e-25	-0.1806	-0.864346
NEDD1	2.05111e-25	0.141932	0.460895
BAK1	2.05529e-25	-0.154332	-0.434801
TOMM40	2.07994e-25	-0.1149	-0.204956
NEK7	2.14784e-25	-0.136185	-0.890373
ARL2	2.17529e-25	-0.1305	-0.313952
PEBP1	2.22148e-25	-0.0726012	-0.109449
HIVEP1	2.47098e-25	0.0809852	0.616355
LEMD3	2.4796e-25	-0.12895	-1.38036
SOCS3	2.52911e-25	-0.133724	-1.41146
DZIP3	2.62873e-25	0.14966	0.406461
NDUFB7	2.64997e-25	-0.102111	-0.181681
SPIRE1	2.66131e-25	0.141019	0.424683
MTMR14	2.69819e-25	-0.151064	-0.45053
X1700007K13RIK	2.71775e-25	-0.159579
APOPT1	2.93317e-25	0.135954	0.289001
LAMTOR4	2.97808e-25	-0.130946	-0.276498
ATXN10	3.25983e-25	0.109293	0.175453
RCBTB1	3.26531e-25	0.159723	0.399511
F11R	3.28471e-25	-0.160797	-0.650097
TCP11L1	3.28838e-25	0.113863	0.453064
KYNU	3.50323e-25	-0.153672	-1.83312
RNH1	3.52658e-25	-0.15708	-0.495008
ZNRD1	3.54762e-25	-0.111689	-0.238913
E2F5	3.56906e-25	0.126883	0.251591
HOXA5	3.69839e-25		-24.5752
SYNE2	3.71749e-25	0.138359	0.420353
MNX1	3.77627e-25	0.00843444	2.14775
TSEN34	3.81879e-25	0.118235	0.213129
CCND2	3.87808e-25	-0.210598	-0.3561
TMEM179	4.2988e-25	0.0123786	1.7647
MAGOH	4.85854e-25	0.0968831	0.156328
LAMA1	4.87717e-25	-0.140441	-0.956771
A2M	5.81971e-25	-0.157192	-2.5093
TLE6	6.43239e-25	-0.146975	-2.33588
MAB21L2	6.43522e-25	0.0190574	-0.00378795
PFAS	6.81904e-25	0.134403	0.357128
VOPP1	6.89163e-25	0.0550781	0.786148
CNTNAP2	6.90801e-25	0.116394	0.584464
ZFP207	7.1657e-25	0.12273	0.225678
CDC14A	7.38184e-25	0.102894	0.526387
JUN	7.40443e-25	0.139734	0.625917
ZIC5	7.62868e-25	-0.207674	-0.554581
MSRB2	7.94355e-25	-0.129908	-1.25589
DCUN1D5	8.10529e-25	0.114737	0.205627
SORD	8.12525e-25	-0.119936	-1.24669
RHOA	8.21003e-25	0.0965403	0.161651
CNOT6	8.25127e-25	0.143925	0.325435
MAP7D1	8.66682e-25	-0.158416	-0.4004
CBLN1	8.93246e-25	-0.153223	-0.904307
ZDHHC20	9.43195e-25	0.151935	0.427774
GLRA1	9.52736e-25	-0.3818	-5.30766
CD1D1	9.73431e-25	0.0434693	0.914853
FAM169B	1.00198e-24	-0.308034	-4.35167
LSM1	1.0578e-24	0.124495	0.242851
CHN1	1.12288e-24	0.126535	0.413757
FMC1	1.12992e-24	-0.125107	-0.312252
CUL1	1.23526e-24	0.118739	0.218806
MGA	1.27506e-24	0.154013	0.328309
SNX12	1.438e-24	0.129919	0.34575
ITM2B	1.44761e-24	-0.152775	-0.370393
EML4	1.45597e-24	0.131658	0.25206
PKM	1.54273e-24	-0.0684276	-0.0948061
PLCXD1	1.54646e-24	-0.122497	-1.53055
SETBP1	1.60194e-24	-0.15877	-0.552848
CDH4	1.6691e-24	-0.148139	-0.761075
ZFP566	1.77033e-24	0.0965011	0.449679
PRICKLE1	1.80909e-24	0.0415369	1.02967
B3GALNT1	1.83026e-24	0.0499728	0.879178
GNG5	1.84565e-24	0.0667343	0.0952641
ZFP652	2.10422e-24	0.154514	0.442251
HBP1	2.11675e-24	-0.156895	-0.479246
CCSAP	2.16275e-24	0.0474063	0.628978
X1810037I17RIK	2.22093e-24	0.136318
DKK1	2.25481e-24	0.13364	0.853574
SH3BP4	2.25481e-24	-0.143691	-0.694157
PXMP4	2.25791e-24	-0.112771	-0.935358
CTDSPL	2.4572e-24	0.115266	0.538426
ATIC	2.46389e-24	0.118804	0.216413
NOTUM	2.61954e-24	-0.169953	-2.26234
GRB7	2.63156e-24	-0.148842	-0.665983
RNASEH1	2.89172e-24	0.133263	0.384972
ARPP19	3.21196e-24	-0.0946634	-0.169307
MECP2	3.41916e-24	0.139721	0.408867
RAP1A	3.4952e-24	0.136896	0.269761
COX7B	3.77959e-24	-0.0915546	-0.13422
PPIC	3.79248e-24	-0.140013	-0.711102
LCORL	3.80963e-24	0.137865	0.501995
GTPBP4	3.92096e-24	0.107183	0.181699
GM3739	4.11381e-24	0.0654899	0.74586
SLC25A39	4.11538e-24	-0.124244	-0.292967
NKX2-1	4.28678e-24	0.0201328	0.466031
RPL13-PS3	4.79987e-24	0.11341	0.204427
HOXB3	4.80415e-24	-0.370293	-4.03995
GM3550	4.9849e-24	0.135873	0.381102
ARF6	5.3478e-24	0.141634	0.304341
NT5C3	5.36646e-24	0.130816	0.410789
SRPK2	5.81842e-24	0.146486	0.378949
CNPY1	5.93595e-24	-0.265164	-3.62438
KBTBD2	6.26758e-24	0.120724	0.460552
GM26652	6.44973e-24	0.0210278	1.33478
CDKN1A	6.58569e-24	-0.147188	-1.07811
NEUROG2	6.99585e-24	-0.450594	-3.91784
NASP	7.04377e-24	-0.0903514	-0.115597
FAM81A	7.08767e-24	-0.13052	-1.84076
WNT3A	7.18977e-24	-0.290782	-3.90718
MAPKAPK2	7.25441e-24	0.137043	0.460044
RPL35A	7.35904e-24	-0.061811	-0.090657
LRRC49	7.77782e-24	0.102238	0.521546
DUSP9	7.93002e-24	-0.146557	-0.77532
DCPS	8.18305e-24	0.109733	0.207647
ATP2B4	8.77178e-24	-0.13535	-1.39359
MAST4	8.87057e-24	0.173577	0.385237
ATR	8.9689e-24	0.147762	0.431601
SLC39A6	9.71382e-24	0.115684	0.511505
MAGI3	1.06104e-23	0.0782736	0.683524
TEX30	1.09033e-23	0.115086	0.271485
TMEM158	1.24602e-23	0.0983145	0.552268
APLNR	1.25266e-23	-0.169953	-3.00214
HES5	1.29128e-23	-0.227273	-0.653143
BEX1	1.38674e-23	-0.102848	-0.155932
H3F3B	1.49029e-23	-0.0713061	-0.1105
X4931406P16RIK	1.5721e-23	0.124996
X2310033P09RIK	1.69793e-23	-0.140861
PPM1H	1.71448e-23	0.0222982	1.24712
HRAS	1.74085e-23	-0.108459	-0.18828
ENY2	1.79698e-23	0.0950264	0.154321
NUP54	1.90397e-23	0.137917	0.292476
X2010107E04RIK	1.90917e-23	-0.0956139
ALKBH7	2.00617e-23	-0.152895	-0.581656
PPP2R1B	2.13298e-23	0.127558	0.30474
NUDCD2	2.19831e-23	0.104175	0.175422
TARBP2	2.27425e-23	-0.123317	-0.295902
AKAP11	2.29016e-23	0.15053	0.437934
MOBP	2.3824e-23	0.0120077	1.81512
PTBP2	2.40659e-23	0.144791	0.297804
ECHDC1	2.40781e-23	0.109966	0.388691
DCTD	2.44756e-23	0.120155	0.345435
KANK1	2.4549e-23	-0.149094	-0.537458
X5730559C18RIK	2.46702e-23	-0.142809
SLC38A1	2.48565e-23	0.125492	0.239841
CHMP1B	2.72795e-23	0.126293	0.46584
LACC1	2.75434e-23	0.0354137	1.02042
KLHL7	2.85977e-23	0.102916	0.461023
LYPLA1	2.92423e-23	0.130392	0.335598
PPIG	2.92423e-23	0.1009	0.187966
UTP15	2.95201e-23	0.124302	0.307328
LINGO1	3.03098e-23	-0.121012	-1.25471
SPIN1	3.30934e-23	0.113634	0.281908
SSRP1	3.44368e-23	-0.105121	-0.161451
PLSCR1	3.51567e-23	0.129946	0.409463
USP25	3.70593e-23	0.122212	0.437022
KDF1	4.06856e-23	-0.130668	-1.93603
PUM2	4.17112e-23	0.129226	0.260682
NTNG1	4.29014e-23	-0.169819	-1.75007
JUND	4.35532e-23	0.174509	0.320059
FAM208B	4.37089e-23	0.152967	0.378278
TMEM41A	4.54184e-23	0.110822	0.395082
SDF2L1	4.85808e-23	0.159614	0.311528
HADHA	5.01144e-23	-0.13835	-0.352407
HSD11B2	5.02492e-23	-0.174497	-0.723091
RBM38	5.17857e-23	0.124225	0.442105
ALX1	5.28565e-23	0.0156615	1.55506
TMEM218	5.37601e-23	-0.150136	-0.550776
TECR	5.42397e-23	-0.0969145	-0.180992
PIN4	5.58877e-23	-0.109821	-0.210565
ERDR1	5.66976e-23	0.133444	0.219256
PLXDC2	6.19896e-23	0.0496825	0.710031
HAT1	6.54167e-23	0.105968	0.16247
LIMA1	6.57813e-23	-0.139943	-0.664452
EBPL	6.60328e-23	-0.137695	-0.396552
RPS27A	6.9664e-23	-0.0513018	-0.0795449
PTCH2	6.9664e-23	-0.124982	-1.31495
IMPA1	7.33489e-23	0.101397	0.214867
GDI2	7.68205e-23	0.0946391	0.157561
NPM3	8.0349e-23	0.121914	0.233213
ACP5	8.15571e-23	-0.119141	-1.75929
GM43517	8.25025e-23	0.000342987	4.40313
GXYLT1	8.64217e-23	0.12728	0.446312
SPDL1	8.66639e-23	-0.172102	-0.461742
FGF13	9.58819e-23	0.07813	0.590865
JAM2	9.66621e-23	-0.125909	-0.980888
GBE1	9.75287e-23	0.0971206	0.533652
RREB1	9.76802e-23	-0.140077	-0.608386
ANXA2	9.90852e-23	-0.124403	-0.963173
FBXO5	1.01973e-22	0.153607	0.284191
GDPD2	1.0203e-22	-0.111337	-1.22678
PREP	1.02693e-22	0.132172	0.373702
JUP	1.04109e-22	-0.104109	-1.2137
PTCHD4	1.05605e-22	0.0183529	1.30626
SON	1.1222e-22	-0.106197	-0.166399
RPS19BP1	1.17425e-22	-0.10721	-0.256032
RFWD2	1.19148e-22	0.134103	0.287157
RBP4	1.27139e-22	-0.142431	-0.984981
GRIN2A	1.27561e-22	-0.151349	-1.65835
PABPC4L	1.29902e-22	0.0808645	0.593573
X4921524J17RIK	1.3025e-22	-0.139303
RHOU	1.35901e-22	-0.146188	-0.539623
SLC8A3	1.35998e-22	0.0257429	1.10431
SV2A	1.39925e-22	-0.10292	-1.25901
RASA2	1.46485e-22	0.109743	0.443001
RPS27L	1.4695e-22	-0.0817784	-0.12021
ARHGAP29	1.51286e-22	-0.167434	-0.504762
QPRT	1.56326e-22	0.125988	0.466454
UBE2Q2	1.56965e-22	-0.149295	-0.398401
BCLAF1	1.67855e-22	0.114946	0.192228
CSTB	1.70903e-22	0.117171	0.247079
GPR153	1.71813e-22	-0.120159	-0.809407
X2810428I15RIK	1.77516e-22	-0.106984
COX4I2	1.80385e-22	0.0803984	0.596836
PCGF3	1.8163e-22	0.144408	0.406886
DSG2	1.86257e-22	-0.133789	-1.25215
PLPP2	1.87134e-22	-0.136298	-0.730109
ZFAND3	1.92337e-22	0.133501	0.339951
FBXW4	1.95889e-22	0.081484	0.629018
X1700011H14RIK	1.98466e-22	-0.577025
TTYH1	1.98971e-22	-0.120211	-0.982235
RAPSN	2.00702e-22	0.0202513	1.12425
EMP1	2.13359e-22	-0.173785	-2.24482
ABCF1	2.36989e-22	-0.101085	-0.174889
CAR12	2.42941e-22	0.0597938	0.693177
MMP16	2.44714e-22	0.0750438	0.694223
WDR48	2.4553e-22	0.111545	0.32958
ZSWIM7	2.52254e-22	-0.14033	-0.534936
LBH	2.55331e-22	-0.116684	-1.34751
MINPP1	2.56914e-22	0.118384	0.267127
RNF146	2.57787e-22	0.131691	0.36915
NDUFA11	2.59403e-22	-0.100606	-0.171267
TBC1D1	2.60249e-22	0.14487	0.404348
SP3	2.60722e-22	0.139584	0.334976
MAPK1	2.65396e-22	0.113073	0.219602
ARFRP1	2.66664e-22	0.116662	0.253423
HAGLR	2.67189e-22	-0.209343	-3.78953
MRPL32	2.91328e-22	0.117807	0.236243
TMA7	2.99748e-22	-0.0719538	-0.099667
TOPBP1	3.03235e-22	0.131974	0.254394
PLCD1	3.07514e-22	0.0310221	0.971043
RDX	3.17276e-22	-0.107224	-0.175531
TCF15	3.29419e-22	-0.144461	-1.39038
TRIM27	3.32195e-22	0.107109	0.189316
HIST2H2AC	3.59295e-22	-0.15059	-0.754087
PLP2	3.62554e-22	0.141884	0.328947
PDZD2	3.8114e-22	-0.14361	-1.01429
STON2	3.97938e-22	-0.116972	-0.988465
SLC16A11	4.09083e-22	-0.205695	-3.34931
SEPT8	4.1844e-22	0.0983322	0.542668
RAP1GDS1	4.22271e-22	0.102899	0.389611
COL5A2	4.38944e-22	-0.11879	-1.24933
SKP2	4.3943e-22	0.133566	0.297091
PSMA3	4.78766e-22	0.0804135	0.122591
NIPA2	4.93841e-22	0.117417	0.270257
TMEM128	5.19545e-22	0.141125	0.294182
EGFL7	5.19545e-22	-0.15049	-0.416781
SSBP4	5.42472e-22	0.078162	0.566385
UTP6	5.51234e-22	0.142414	0.334993
FIGNL1	5.55472e-22	0.132717	0.389448
FKBP11	5.66484e-22	-0.155028	-0.361948
PRSS23	5.79368e-22	0.09158	0.564693
WIF1	5.82329e-22	-0.288357	-3.83503
LEF1	6.25919e-22	0.166595	0.454613
KIF15	6.37252e-22	0.1335	0.263407
ZYG11B	6.37252e-22	0.122476	0.443039
FJX1	6.39878e-22	-0.17418	-0.407327
RASL11B	6.62697e-22	-0.124541	-0.917366
TBL1XR1	7.13159e-22	0.144134	0.417607
ASCL1	7.17478e-22	-0.328328	-3.56381
KCNG1	7.30685e-22	0.0503709	0.784035
FBXL15	7.62562e-22	-0.136087	-0.623717
KMT2E	7.67039e-22	0.168141	0.376282
LTBP4	7.67859e-22	0.0463086	0.79629
SLC38A2	7.72476e-22	0.136402	0.255693
PTPRS	7.89158e-22	0.155861	0.374019
E2F3	8.27283e-22	0.13675	0.360367
PHLPP1	8.85698e-22	0.0676946	0.562607
COX6B1	9.25613e-22	-0.0762768	-0.122168
CASP8AP2	9.36656e-22	0.149415	0.276249
CD164	9.64131e-22	0.12619	0.280488
RALY	9.64131e-22	-0.0987562	-0.152284
DFNA5	9.7344e-22	0.106882	0.327816
UQCC2	9.93136e-22	0.0966842	0.149043
ZCCHC18	9.97216e-22	-0.14649	-0.569255
ATP5D	1.01418e-21	-0.082488	-0.141871
RPL39	1.15263e-21	-0.0679505	-0.10114
ALDH7A1	1.15968e-21	0.102598	0.224073
LIMD1	1.20659e-21	0.145612	0.363455
SOX9	1.21635e-21	0.167842	0.425338
RPRD1B	1.26227e-21	0.119462	0.29749
CYP26C1	1.27299e-21	-0.225961	-3.17581
GPN2	1.30329e-21	0.0957728	0.442959
TRNT1	1.30574e-21	0.126003	0.254869
AR	1.31429e-21	-0.11854	-0.786087
POLR2H	1.37919e-21	0.101183	0.184743
CLINT1	1.41835e-21	0.124426	0.248635
SBDS	1.59155e-21	0.111208	0.24257
KDM6B	1.62675e-21	0.144939	0.349812
RBBP9	1.65067e-21	0.134545	0.443862
PPIF	1.72751e-21	-0.137003	-0.416332
ARPC2	1.78462e-21	0.0913608	0.157451
MRGBP	1.9305e-21	0.12095	0.372294
PHTF1	2.08928e-21	0.137588	0.387041
AACS	2.11961e-21	0.0334234	0.908005
BARHL2	2.13097e-21	-0.274061	-2.82245
MAT2A	2.1418e-21	0.105955	0.189907
RBMS2	2.19951e-21	0.129822	0.321902
CDC14B	2.21037e-21	0.0819327	0.35943
RPL9	2.22337e-21	0.0511252	0.0737299
AVL9	2.27799e-21	0.105688	0.464367
MAPK6	2.36126e-21	0.132626	0.303307
DERA	2.48016e-21	-0.130457	-0.314276
AQP5	2.54628e-21	-0.364791	-5.56352
DBX1	2.61677e-21	-0.290398	-3.1876
GM26735	2.76031e-21	0.112362	0.512388
HAUS2	2.87698e-21	0.111712	0.408625
THSD7A	2.90619e-21	0.0555062	0.781541
TLN1	2.96769e-21	-0.137196	-0.333118
PAX8	3.02342e-21	-0.129749	-0.912737
CHP1	3.22058e-21	0.121873	0.391403
CDK8	3.33795e-21	0.123277	0.264911
RNF217	3.51227e-21	0.073115	0.56181
D5ERTD579E	3.79955e-21	0.129369	0.418146
VASP	3.80625e-21	0.125429	0.344391
LY6H	3.93558e-21	-0.130897	-0.87317
ENSA	3.96307e-21	0.145293	0.336686
CELF1	3.98133e-21	0.119599	0.219305
ATP6V0E	4.22521e-21	-0.111318	-0.222079
HDAC5	4.68584e-21	-0.134342	-0.532985
SMIM11	4.6876e-21	-0.113452	-0.229417
SNAPC5	4.7022e-21	-0.121759	-0.266691
SKIL	5.18481e-21	0.0712786	0.631326
MTERF3	5.19974e-21	0.141568	0.375844
SDHAF3	5.23145e-21	0.107412	0.393764
CAMTA1	5.88476e-21	0.127453	0.275516
NETO2	5.90102e-21	0.0861455	0.503654
HSPG2	5.97749e-21	-0.11293	-0.902992
RABGGTB	6.00473e-21	0.138404	0.283919
TSPAN2	6.02697e-21	0.0614043	0.710205
PPP2R2D	6.10641e-21	-0.11326	-0.273538
TAOK1	6.15435e-21	0.127987	0.326483
STMN4	6.16824e-21	0.00690484	2.25607
RSRP1	6.1897e-21	0.123178	0.234498
OTUB1	6.27541e-21	0.114349	0.225911
USPL1	6.54149e-21	0.102257	0.30619
NAA38	6.85993e-21	-0.116741	-0.266852
STARD8	6.88388e-21	-0.117405	-1.80385
COMMD6	7.26231e-21	0.113697	0.243514
H2AFV	7.5707e-21	0.0777093	0.111251
SSFA2	7.59219e-21	0.0372896	0.86029
CAR10	7.59468e-21	0.0454396	0.766709
SEPT10	7.77544e-21	0.126243	0.436474
PREPL	8.16012e-21	0.0519252	0.576967
ARHGAP5	8.30675e-21	0.124972	0.237211
ERBIN	8.3829e-21	0.115539	0.524433
KLF7	9.37467e-21	0.0888342	0.602232
HAUS6	1.0328e-20	0.120979	0.380007
PPM1A	1.07699e-20	0.137891	0.325197
LRRC4C	1.08889e-20	0.0104835	1.62744
ATRX	1.11007e-20	0.12076	0.206418
CCNT2	1.12566e-20	0.114696	0.24101
CDKL3	1.15093e-20	0.0708006	0.562975
STXBP6	1.1756e-20	0.101382	0.381164
FNDC5	1.26225e-20	-0.113238	-1.9125
BARHL1	1.37707e-20	-0.242068	-3.10954
ODF2	1.4368e-20	-0.142323	-0.323191
DPPA5A	1.47099e-20	-0.115151	-2.04192
CENPQ	1.4932e-20	0.12062	0.305602
RSPO3	1.50566e-20	-0.12752	-1.26278
CNIH2	1.5115e-20	-0.142834	-0.503069
WDFY1	1.54697e-20	0.126183	0.304956
GSTT1	1.56159e-20	-0.107317	-1.1595
SLK	1.56317e-20	0.127959	0.334953
HIST1H2AE	1.63824e-20	-0.239902	-0.458529
BSPRY	1.66882e-20	-0.11759	-1.95431
SSX2IP	1.67277e-20	0.12473	0.409409
MED7	1.80909e-20	0.114236	0.278827
CERS4	1.81174e-20	0.10402	0.566763
ORC6	1.83932e-20	0.11432	0.194515
EFHD1	2.00637e-20	0.0198868	1.08
TMEM164	2.01353e-20	0.0948633	0.475743
NUTF2	2.01733e-20	0.117456	0.385827
WDR12	2.1677e-20	0.109638	0.207935
YWHAH	2.1875e-20	0.095552	0.170709
NDUFA5	2.25825e-20	-0.0989794	-0.1802
GM14418	2.25895e-20	0.0385833	0.79343
B130046B21RIK	2.28726e-20	-0.120991	-1.93604
TMX3	2.34475e-20	0.129618	0.31348
TFRC	2.3497e-20	0.134874	0.311125
RNF208	2.36464e-20	0.0547894	0.731416
MYRF	2.39016e-20	-0.113012	-0.872303
CPE	2.47043e-20	0.158046	0.376207
ARMCX2	2.59799e-20	0.122614	0.27533
RAB33A	2.69115e-20	0.0223616	1.05
CLASP1	2.70537e-20	0.138756	0.33798
SPATA5	2.77432e-20	0.107915	0.297808
TPRGL	3.0001e-20	-0.123877	-0.297271
NKTR	3.00541e-20	0.134231	0.257422
CLU	3.0882e-20	0.0763329	0.500749
HIST1H2BF	3.14699e-20	-0.109993	-1.1518
EXOC6	3.16422e-20	-0.123229	-1.01126
C130026L21RIK	3.35774e-20	-0.104112	-0.701341
SIVA1	3.41316e-20	-0.0845457	-0.133534
ANXA7	3.42178e-20	-0.125381	-0.644374
LRRK2	3.58982e-20	-0.176511	-3.23194
GAR1	3.95256e-20	0.0987322	0.163612
ADK	4.01739e-20	0.114861	0.235431
TMEM130	4.02975e-20	-0.120855	-1.98553
GADD45G	4.08219e-20	-0.170071	-2.20994
X2010111I01RIK	4.08899e-20	-0.103542
LEMD1	4.22137e-20	0.0510112	0.699529
SPG20	4.32718e-20	0.135295	0.399428
RNF2	4.52936e-20	0.126348	0.297199
CENPB	4.86812e-20	0.127	0.26664
MED6	4.90854e-20	0.113801	0.286196
CEP83	4.92576e-20	0.130624	0.29726
LIN7C	4.93631e-20	0.12768	0.292411
PAX7	4.95155e-20	-0.123725	-0.896536
CNOT7	5.05292e-20	0.122443	0.255667
GM20554	5.05292e-20	-0.233282	-3.74269
ERGIC1	5.1574e-20	0.111356	0.289351
BLOC1S2	5.28429e-20	0.107179	0.218188
GSTP1	5.30001e-20	-0.132479	-0.606735
CCT4	5.3769e-20	0.084375	0.124438
ZFP239	5.51677e-20	0.107879	0.374571
SREBF2	5.73938e-20	0.0956556	0.426055
X6720489N17RIK	5.80034e-20	0.0850369
NOC2L	6.11948e-20	0.105569	0.213351
AKT1	6.2929e-20	0.121309	0.37158
NDFIP2	6.57363e-20	0.133424	0.362322
OGFRL1	6.85942e-20	0.111473	0.472162
MSX2	6.89094e-20	-0.151222	-1.3154
YPEL3	6.97144e-20	-0.135945	-0.518626
ZFP146	7.11435e-20	0.11387	0.398315
TMEM30A	7.16472e-20	0.130279	0.347996
HOXD4	7.49462e-20		-24.4477
RGS19	7.50068e-20	0.101117	0.259294
RNF4	7.53211e-20	0.144817	0.29582
BRAF	7.54521e-20	0.133341	0.398058
CHMP4C	7.56604e-20	-0.0940927	-1.35265
OSGEP	7.63127e-20	-0.11748	-0.26498
HIST1H4D	7.8253e-20	-0.176486	-0.40712
APITD1	8.02959e-20	-0.120662	-0.272652
EVA1B	8.05864e-20	-0.139102	-0.631893
SLC25A22	8.15914e-20	0.0732636	0.50912
ARMCX4	8.3511e-20	0.124605	0.446954
RTN4	8.65936e-20	-0.101501	-0.180664
AGMAT	9.1058e-20	-0.296956	-5.41754
GDPD1	9.20582e-20	0.0941816	0.516404
SLC35A1	9.45975e-20	0.124247	0.277708
CYYR1	9.69856e-20	-0.192153	-3.40423
COX6B2	9.71526e-20	-0.144964	-0.443041
NAE1	9.98357e-20	0.115434	0.229289
ANK	1.00077e-19	0.0432005	0.789987
LIFR	1.02095e-19	-0.118897	-1.01244
NRIP3	1.03251e-19	0.0373731	0.921834
TM9SF4	1.04299e-19	-0.136918	-0.325298
D3ERTD751E	1.07759e-19	0.101649	0.499491
SDCBP	1.0803e-19	0.131778	0.306754
DNAJC3	1.11116e-19	-0.137283	-0.330611
NUDC	1.15284e-19	-0.0840553	-0.133356
NR4A3	1.18575e-19	-0.111895	-1.95596
LRRN2	1.22336e-19	-0.10508	-1.54675
GM2694	1.22745e-19	0.123423	0.175116
AQP11	1.24803e-19	0.094307	0.545131
RNASEH2C	1.26214e-19	-0.0998111	-0.199874
MATR3	1.27891e-19	0.103708	0.190027
FAM92A	1.29865e-19	0.11483	0.228157
PRSS35	1.40909e-19	-0.144163	-2.60153
ANXA6	1.41826e-19	-0.105699	-0.943719
GOLT1B	1.43855e-19	0.126289	0.309823
X2410080I02RIK	1.51103e-19	-0.145637
THUMPD3	1.69238e-19	0.126982	0.294018
SUMO1	1.77554e-19	0.0735155	0.119775
GJB3	1.79254e-19	-0.132259	-1.61053
EAF1	1.92311e-19	0.0883876	0.491774
CCDC124	1.95418e-19	-0.100769	-0.2172
CRK	1.98057e-19	0.131732	0.303213
LSAMP	2.00624e-19	0.0598531	0.755849
UBE2J2	2.03093e-19	0.0952104	0.17567
TSC22D3	2.04118e-19	0.129636	0.413566
B230312C02RIK	2.1238e-19	-0.212398	-0.495842
MAPK11	2.14546e-19	0.0755755	0.596022
NLGN2	2.16386e-19	0.0825546	0.527594
LSM7	2.17967e-19	-0.124579	-0.258471
RBM15B	2.19698e-19	0.141429	0.334294
ARMC10	2.27574e-19	0.122349	0.279945
RAB4A	2.32507e-19	-0.134713	-0.386593
PLAC8	2.38126e-19	-0.113316	-0.939613
NUP37	2.39158e-19	0.107052	0.219573
FAIM	2.42999e-19	0.124196	0.302352
IVD	2.58041e-19	-0.133228	-0.427107
REXO2	2.64459e-19	0.112832	0.21258
ATF1	2.77242e-19	0.126592	0.287311
NUDT10	2.93512e-19	0.071578	0.496191
CAMSAP3	3.03778e-19	0.0815953	0.549165
SMEK1	3.11886e-19	0.122582	0.264216
GOLGA3	3.1622e-19	-0.202816	-0.511222
SHFM1	3.17604e-19	0.0648217	0.0873162
CDC123	3.4169e-19	0.0961569	0.170163
ZFP945	3.42016e-19	0.108459	0.374813
PSMC2	3.44818e-19	0.0930592	0.149191
HOOK1	3.51912e-19	0.142663	0.399492
RNF157	3.74435e-19	0.0397726	0.834841
FBXO33	3.78245e-19	0.0903754	0.440562
ZFP65	3.78545e-19	0.0660403	0.469489
CSDE1	3.79402e-19	0.113931	0.2154
NEK2	3.7969e-19	0.113265	0.448093
GOLGB1	3.81724e-19	-0.14948	-0.297599
HEPH	3.84193e-19	0.0614186	0.668076
PDE5A	3.96237e-19	0.0861361	0.414081
GCHFR	4.05563e-19	0.0749146	0.537699
TCEAL5	4.11932e-19	-0.121356	-0.626092
STRAP	4.27086e-19	0.0922459	0.142848
COL13A1	4.4374e-19	-0.111277	-2.1568
ZMAT3	4.56017e-19	0.106506	0.329842
MAP9	4.64754e-19	0.0825443	0.480969
SOCS6	4.66436e-19	0.131894	0.339401
UBE2W	4.77621e-19	0.1107	0.364979
X5330434G04RIK	4.85291e-19	0.112327
COQ3	4.88085e-19	-0.108428	-0.63792
X1500009L16RIK	4.92291e-19	0.133845
SUV39H1	5.00059e-19	0.131789	0.337532
NDC80	5.0533e-19	0.152824	0.365164
CYBA	5.0557e-19	0.0821664	0.18568
HCCS	5.08003e-19	0.107307	0.422345
RBBP4	5.08542e-19	0.0887236	0.149336
ABTB2	5.25357e-19	0.0174678	1.22985
ITM2A	5.32233e-19	0.132138	0.393486
KRCC1	5.41713e-19	0.143586	0.356218
STMN3	5.43625e-19	-0.132725	-0.4393
FOXC2	5.49279e-19	-0.0979701	-2.0591
CAPN2	5.57457e-19	-0.121806	-0.523111
MCM3	5.62302e-19	-0.107879	-0.1724
PGP	5.9896e-19	-0.104854	-0.227688
CNN3	6.02436e-19	0.103708	0.192331
UCK2	6.0569e-19	0.102749	0.206517
FAAH	6.11605e-19	-0.227615	-3.67137
RRAGA	6.14451e-19	0.0974821	0.173915
DOK6	6.16792e-19	0.0108458	1.56569
ERI3	6.37996e-19	-0.12031	-0.286154
PGK1	6.81313e-19	-0.130648	-0.294783
PHB	7.06599e-19	-0.114351	-0.251637
GOLGA7	7.29303e-19	0.11644	0.242356
BICD1	7.40598e-19	0.115002	0.393989
AFP	7.40723e-19		-23.9805
MRPS34	7.641e-19	-0.109516	-0.238207
RPL10A	7.64524e-19	-0.0519488	-0.075029
FUS	7.70956e-19	0.103749	0.18207
DDAH1	7.88204e-19	-0.138203	-0.356987
TIMM21	8.0492e-19	0.112201	0.253721
WDR86	8.3088e-19	0.0998419	0.4278
BID	8.8068e-19	0.0739904	0.483737
X1700021F05RIK	8.90046e-19	-0.132465
HNRNPH1	8.99993e-19	0.107674	0.191919
PAIP1	9.05211e-19	0.14116	0.275655
KDM5B	9.15159e-19	-0.113598	-0.173668
GAS1	1.03349e-18	0.165188	0.38951
X2410002F23RIK	1.05603e-18	0.123769
SRSF10	1.06288e-18	0.0884804	0.152047
BEND5	1.0681e-18	0.0865298	0.348861
NUP205	1.10652e-18	0.116405	0.321707
RASSF1	1.15748e-18	0.0987557	0.329147
RXRA	1.16487e-18	-0.111215	-0.727588
CTCF	1.17612e-18	-0.096418	-0.142554
TPM4	1.20351e-18	0.111147	0.214701
SESN3	1.20537e-18	0.136921	0.372617
PCYT1B	1.22335e-18	-0.106056	-1.03592
ADARB2	1.23774e-18	0.00656199	1.91322
SHH	1.247e-18	-0.387433	-2.9592
SLC16A10	1.27898e-18	-0.0882899	-1.4548
EPHA7	1.28183e-18	0.0920202	0.188105
PRDX1	1.43743e-18	0.0622316	0.0902456
GM45340	1.43972e-18	-0.113046	-1.638
VAMP8	1.47493e-18	-0.132479	-0.515743
OPA1	1.4991e-18	0.103926	0.292596
TRO	1.54514e-18	0.116023	0.344265
PPP1R9A	1.54552e-18	0.149801	0.399986
FYTTD1	1.63708e-18	0.128653	0.264429
MSANTD2	1.66255e-18	0.0702686	0.203708
UTRN	1.66479e-18	-0.142478	-0.623448
IRX4	1.67053e-18	-0.278593	-5.23284
MARK3	1.8021e-18	0.125748	0.273028
[truncated: 7,590 more rows]

## Sheet: PhenoGraph cluster 4
gene	P-value (FDR adjusted)	MAST Hurdle	logFC
WLS	0	1.12163	1.75197
CCND2	0	1.01905	1.66934
PLEKHA1	0	0.726563	1.58583
PDHA1	0	0.716705	1.2301
ILDR2	0	0.712138	1.57117
FAM181B	0	0.694931	3.98939
TENM4	0	0.672725	1.42115
FLRT3	0	0.664641	1.62084
IGDCC3	0	0.645525	1.99389
UCHL1	0	0.615464	1.35613
TPBG	0	0.583132	1.99115
CRIP2	0	0.58192	1.40622
LIX1	0	0.580785	2.49005
EFNA2	0	0.547411	2.77329
AXIN2	0	0.543059	2.04448
RFX4	0	0.508647	1.93028
EN1	0	0.508252	4.53684
CHST2	0	0.482949	2.26101
PRKAR2B	0	0.459353	1.3878
ITGA6	0	0.43051	1.57094
IRX1	0	0.406905	2.60095
EHBP1	0	0.374899	2.08454
SP5	0	0.374868	2.90004
TAL2	0	0.32875	2.55706
MYLK	0	0.314457	2.46903
OTX1	0	0.30655	2.51936
GLRX	0	0.303174	1.67127
IRF2BPL	0	0.296476	2.21342
POU3F2	0	0.295898	2.29388
WSCD1	0	0.282438	2.09405
PAX5	0	0.233146	3.1305
TMEM132C	0	0.179401	2.75302
FLRT1	0	0.136284	3.04252
PAX8	0	0.125671	2.90755
WNT1	0	0.111128	4.61607
EN2	0	0.106604	3.55431
MAB21L2	0	0.102477	4.61418
TRH	0	0.0878629	3.50988
X2700046A07RIK	0	0.0526445
X2610027F03RIK	0	0.0417964
ENPP2	0	0.0351226	4.4594
PKDCC	0	-0.666165	-2.71472
FZD2	0	-0.691765	-1.5922
STMN2	0	-0.801368	-1.82696
EPHA4	0	-0.85598	-2.96867
FST	0	-1.49794	-3.53303
POU5F1	0	-1.62372	-3.80027
DMBX1	8.03704e-308	0.0451509	3.22992
CCNJL	1.60023e-307	0.411643	1.36437
SAMD5	1.71044e-303	0.0540787	3.07138
ERAS	3.68197e-299	-0.910931	-2.44516
LAPTM4B	1.25233e-298	0.388121	1.40376
ZIC3	4.8154e-297	-0.712868	-2.54206
ZFHX3	9.36623e-297	0.424084	1.56599
SPARC	1.53507e-296	-0.541159	-1.3929
ZFP503	2.51447e-296	0.622908	1.83619
PANTR1	1.98153e-294	0.118058	2.36984
X2510009E07RIK	1.42966e-276	0.167138
WNT4	6.48391e-275	0.109595	2.40676
OTX2	6.34877e-274	0.963568	1.81943
PIM2	2.39223e-266	-1.02769	-2.94977
NAV2	4.37629e-264	0.448658	1.36203
SORBS2	2.15553e-261	0.240469	1.84919
ACER2	5.16856e-260	-0.816692	-2.01908
NR2F1	3.20429e-258	0.635373	1.71769
NR2F6	8.76488e-257	0.540106	0.987619
RFLNB	4.21395e-256	0.305381	1.66612
PAM	6.21022e-256	0.321692	1.61036
POU3F3	4.75777e-255	0.057667	2.77484
CHCHD10	6.64154e-254	-0.989563	-3.03236
RBFOX3	2.92685e-251	0.110098	2.14598
MEX3B	2.61957e-249	0.429379	1.48753
EPCAM	5.13288e-247	-1.268	-3.42463
IL17RD	4.37697e-243	0.216799	2.05901
SIX3	2.27576e-239	-2.2674	-4.43886
LGI1	2.75278e-235	0.025682	3.37237
HES5	8.31246e-235	0.439009	2.02185
LARGE2	2.93896e-234	0.255535	1.51814
UPP1	5.21727e-233	-1.13252	-3.91697
PAX6	5.05077e-231	-1.24689	-3.27063
FAM64A	2.0871e-222	0.536572	1.03759
MAGEH1	2.03008e-219	0.49244	0.99481
PIM1	4.93682e-210	0.284444	1.75414
LMX1B	3.10097e-209	0.1566	1.87339
MEG3	1.0227e-208	-0.63629	-1.09492
APCDD1	4.71723e-207	0.0120271	3.73294
MUM1	4.7817e-206	0.38204	0.852312
RRAGB	5.43072e-205	0.375368	1.25372
ID3	5.0211e-203	0.762611	1.14496
RASGRP2	6.20558e-201	-0.599349	-1.78228
KHDRBS3	1.07885e-200	0.498428	0.882018
PCSK1N	2.44683e-200	-0.681981	-1.36558
HESX1	3.29409e-200	-1.52984	-4.29001
SHISA2	1.02878e-198	-1.07387	-2.83579
NKD1	2.54147e-198	0.370227	1.48146
DDN	6.42586e-196	0.0109272	3.87935
BNIP3L	1.53594e-195	0.32977	0.507614
RHOB	1.90145e-194	0.219653	1.48026
CACHD1	5.91757e-190	0.384397	1.1302
APOE	1.4323e-186	-0.549655	-1.13841
MPP2	1.77556e-185	0.141352	1.60283
L1TD1	5.17977e-185	-1.01721	-4.5077
AKAP12	9.91962e-184	-0.536963	-1.55323
JUND	3.8386e-183	0.518244	0.861603
EFNA5	9.14365e-180	0.514321	1.11732
ZFHX4	1.39979e-179	0.242509	1.61984
VSTM2B	1.95148e-179	0.392628	1.40099
DNMT3B	5.08706e-177	-0.627852	-1.11027
WNT8A	2.54307e-174	-1.84426	-10.4388
KCTD12	2.77109e-174	0.0993861	2.01853
TSPO	2.78785e-174	-0.438624	-1.39205
GREB1L	4.16299e-173	-0.436936	-1.07905
SERPINE2	2.08689e-172	0.220146	1.23796
CELRR	4.22306e-171	0.0345946	2.75605
TCF7L1	7.80489e-170	-0.474708	-1.25466
GAS1	1.03897e-168	0.453817	1.12225
SLCO3A1	1.51685e-168	0.126148	1.72814
NDNF	3.7591e-167	0.132888	1.97045
FOXD4	7.89167e-165	-1.07915	-3.91975
PROKR1	8.12614e-165	0.0472188	2.39768
CDH1	1.47333e-164	-0.855314	-3.77791
MSI1	6.77945e-164	0.426184	0.815271
HNRNPH3	3.27218e-163	0.308406	0.518846
FEZF1	5.56429e-163	-1.25548	-4.36907
SOX21	1.05522e-161	0.584686	1.27607
EXOC5	1.09076e-161	0.38515	1.01586
SFRP1	4.61989e-160	-0.468837	-0.840062
PRSS35	6.88239e-160	0.0144239	3.44309
LGR4	2.94051e-159	-0.504138	-2.09882
IQGAP1	9.47399e-159	-0.554426	-1.3282
JAM2	2.81944e-158	0.0963749	1.75357
MLLT3	1.893e-157	0.487703	1.14189
SALL3	1.00295e-156	-0.46068	-1.42477
RAX	1.46419e-156	-1.81036	-4.81449
RAB3B	5.4223e-156	0.0652675	1.99499
HSPB1	6.8629e-156	-0.817557	-5.75923
LRRC8B	1.13171e-154	0.134291	1.62629
EMP1	1.36759e-154	0.029868	2.94214
FBLN2	8.51211e-153	0.14136	1.72748
MACROD2	1.01971e-152	0.289524	1.02419
FZD5	1.70884e-152	-1.01052	-3.475
ABCG5	4.80282e-152	0.0286409	2.74561
KLHL14	3.67544e-151	0.0564758	2.23007
CYP26A1	2.7628e-149	-1.21389	-4.8613
LHX2	5.48958e-149	-1.37536	-3.45075
RND1	7.50915e-149	0.0605902	2.01742
EBF1	1.63253e-148	-0.621573	-2.80963
RAB25	1.99185e-148	-0.704788	-4.42382
B130046B21RIK	2.31575e-148	0.0222148	2.79471
TRP53I11	5.78063e-148	0.332393	1.06969
CXXC5	1.18406e-147	0.334357	1.02772
TSPAN13	3.29986e-147	0.428976	0.808401
TUBB2A	3.80068e-147	0.150797	1.42714
HOXA1	1.6147e-145	-2.33658	-7.07354
CAR4	1.63576e-144	0.591888	1.10668
ARF3	1.54511e-143	0.366338	0.888187
FZD3	1.83787e-143	0.435068	0.999382
PCP4L1	3.0947e-143	0.041156	2.56002
IRX2	3.51511e-143	0.288548	1.12824
HOXB2	4.55196e-143	-1.45476	-4.59565
KCNA5	4.65643e-143	0.0191117	3.14696
FJX1	5.82779e-143	0.472575	0.950302
NUAK2	1.10025e-142	0.28431	1.10515
LRRC8C	4.81563e-142	0.20397	1.19738
SRGAP3	1.44005e-141	0.183158	1.36005
FGF18	9.16013e-141	0.0439807	2.62794
SPRY1	2.69372e-139	0.207571	1.46012
HOXB1	9.85228e-138	-1.19503	-5.80095
HSPB8	4.52013e-137	0.0404045	2.33294
FZD7	1.19933e-136	-0.45532	-1.60714
ADGRG1	4.02128e-136	0.0650517	1.92588
GALNT10	9.31667e-136	0.139707	1.37106
HOPX	1.88945e-135	-0.732993	-2.68291
GALNT7	4.25837e-135	0.297702	1.03033
SYT7	9.22819e-134	0.151475	1.37552
PHLDA2	4.0163e-133	-0.557394	-2.3583
MYCL	3.34491e-132	0.383476	1.11386
FZD10	3.65899e-132	0.180024	1.47569
TMEM38B	1.63573e-130	0.208969	1.26194
MAPRE2	8.96356e-129	0.311519	0.725098
VRTN	1.0674e-128	-0.740202	-5.04314
ECI1	1.23707e-128	-0.460212	-1.66724
SDF2L1	3.08072e-127	0.365387	0.694996
CXCL12	3.98138e-127	-0.922492	-4.1797
FREM2	5.65213e-127	0.213679	1.16061
EFNB3	7.49743e-127	0.258012	1.21767
GBX2	1.97832e-125	-0.669419	-2.22766
APOC1	7.65291e-125	-0.559954	-3.06017
H2AFY	2.28579e-124	0.373802	0.634077
USP51	6.4727e-124	0.292513	1.01553
PLAGL2	7.15674e-123	0.351725	0.970675
X2900011O08RIK	9.81212e-123	-0.543388
FUOM	1.44109e-121	-0.716263	-4.79366
RPL28	3.59019e-121	-0.126508	-0.184183
RPL36A	3.97843e-121	-0.138061	-0.204882
MT-CO1	2.32964e-118	-0.27939	-0.413411
TMEM238	2.8274e-118	-0.513125	-2.43642
MTCL1	9.30408e-118	0.364646	0.8972
FAM57B	1.33359e-117	-0.403184	-1.56668
ID1	2.19982e-117	0.562676	1.13507
CNPY1	4.19157e-117	0.019205	2.77783
CNN3	3.69229e-116	0.273087	0.484794
GM10076	3.82776e-116	-0.492834	-0.762271
APELA	3.95431e-116	-0.820987	-3.91733
ANO1	6.61966e-116	0.0564407	2.00828
TRPS1	2.10617e-115	0.0991733	1.57098
UCP2	1.04405e-114	-0.376371	-1.24765
MT-ND6	1.45885e-114	0.477773	0.870214
NOVA2	2.48661e-114	0.127101	1.32844
KBTBD11	2.92127e-114	0.204404	1.23768
UBE2K	2.39775e-113	-0.296071	-0.473434
GPC3	2.47465e-113	-0.413754	-0.970229
TSPAN18	9.34537e-113	0.150909	1.34193
C130026L21RIK	9.8087e-113	0.121926	1.44363
RPS29	1.85643e-112	-0.22693	-0.340589
CD24A	5.26509e-112	0.464964	0.597523
CLDN6	1.75567e-111	-0.790517	-4.00688
SNRPF	1.83492e-111	0.225676	0.355096
MYC	6.56436e-111	0.229585	1.23673
WWC1	8.4417e-111	0.283136	0.866087
FAM49B	8.91328e-111	0.308092	0.582561
SAP30	9.20106e-111	0.310149	0.57151
SLC25A4	1.98104e-110	0.330598	0.531912
IER2	5.55181e-110	0.314584	0.615844
SOX4	2.94015e-109	-0.317916	-0.509328
ZFP703	1.58225e-108	-0.722585	-2.37739
RARG	2.19996e-108	-0.394965	-1.85786
RSPO2	3.69868e-108	0.0139889	3.07851
ERMN	4.34825e-108	-1.16794	-5.71315
RPL37	5.37207e-108	-0.19395	-0.298546
PCDH8	9.90632e-108	0.0875703	1.73711
GM266	1.49216e-107	0.084285	1.636
PHLDA1	5.60517e-107	0.444767	1.04088
WDR86	3.16655e-106	-0.341112	-1.30556
ZSCAN10	3.54543e-106	-0.412795	-1.87572
RPS8	3.86403e-106	-0.108184	-0.164829
SLC38A11	5.15939e-106	0.00639736	3.86064
LMO1	4.16269e-105	0.354416	0.63704
ALYREF	6.35468e-105	0.272107	0.458215
SEMA6A	6.35468e-105	-0.434189	-1.55166
POU3F4	8.73099e-105	0.0571417	1.85429
TLE3	2.39487e-103	0.286575	0.795477
AP1M2	1.12495e-102	-0.586166	-3.85645
PDZRN3	1.25924e-102	-0.435543	-2.10915
SELENOK	2.0647e-102	0.261842	0.459551
MAPK8IP1	2.78958e-102	0.253393	0.85922
TEX16	1.17007e-100	0.0170969	2.76061
TNFRSF19	1.51369e-100	0.397981	0.942024
WFIKKN1	1.71836e-100	0.0503304	1.95762
LPAR4	3.23409e-100	-0.355394	-0.805778
MEST	8.91115e-100	0.633989	0.85638
MORF4L2	1.25144e-99	0.260364	0.453903
LRTM1	1.25144e-99	0.0142119	2.99721
SERF1	1.93454e-99	0.41327	0.705668
CACNA1G	5.41871e-99	0.090316	1.52779
ZCRB1	6.70309e-99	0.282823	0.472881
SULF1	8.66114e-99	-0.410657	-1.29266
PFDN2	1.08131e-98	0.232337	0.401334
EFNB2	1.19534e-98	-0.480542	-1.30042
TCF12	1.75753e-98	0.35283	0.654371
X2610318N02RIK	2.56147e-98	0.285891
WNT5A	3.6864e-98	0.150725	1.32587
RPA3	3.75006e-98	0.352943	0.606144
SPINK1	4.84042e-98	-0.584573	-3.43491
DUSP9	9.68945e-98	-0.406707	-1.94441
SRGAP1	1.41362e-97	0.114122	1.30352
RGMA	1.54912e-97	-0.288657	-0.7658
NANOG	1.88448e-97	-0.581692	-4.55248
TMEM263	3.19595e-97	0.216427	0.974829
KCNQ3	5.82312e-97	0.0223219	2.56043
GM1673	2.7671e-96	0.368068	0.594839
SNRPN	3.70185e-96	-0.316727	-0.565781
TOX3	6.45818e-96	0.448968	0.873361
CDX1	1.40833e-95	-2.00962	-5.69668
DACT2	2.09066e-95	-0.589006	-3.40043
FBLIM1	3.1823e-95	-0.441968	-2.27322
FEZF2	5.90342e-95	-0.930943	-4.5342
SMIM3	9.58852e-95	0.171674	1.12624
ARF1	1.22127e-94	0.199314	0.336441
RBPMS2	1.80114e-94	-0.346788	-0.895076
HMGB3	2.40731e-94	0.209559	0.337826
CCND1	2.61845e-94	0.370003	0.656751
BST2	3.85395e-94	-0.34604	-1.2202
CAPG	2.13245e-93	-0.430236	-2.75726
FRA10AC1	2.31355e-93	0.243289	0.779354
MED25	2.37989e-93	0.266036	0.566781
PAX2	4.76065e-93	0.312035	1.08342
RPL18A	5.24962e-93	-0.110922	-0.15964
IRX3	1.08366e-92	0.542219	0.649287
DDIT4	1.59286e-92	-0.379581	-0.900785
RPL37A	1.62282e-92	-0.161352	-0.241791
IRF2BP2	2.19198e-92	0.250662	0.971708
PAX7	2.53932e-92	0.0979665	1.69239
CAR14	2.98252e-92	0.350819	0.738582
NRG1	3.12369e-92	-0.667438	-3.14164
ERICH2	3.16334e-92	0.0267538	2.25184
FOXP4	4.55873e-92	0.229192	0.946332
NKX1-2	7.99904e-92	-1.24613	-5.34304
SP8	8.23338e-92	0.351484	0.945204
MSX1	1.29085e-91	0.16105	1.61731
OAT	1.33654e-91	-0.378052	-0.914515
GMFG	1.79271e-91	-0.36688	-2.03585
SLC1A3	2.4299e-91	-0.384288	-1.68019
GNB2	4.17137e-91	0.237424	0.401046
WNT3A	6.51656e-91	0.0171054	2.81652
GM11627	6.74651e-91	-0.344993	-1.6479
PAX3	7.5171e-91	0.257441	1.45659
GM26917	1.17322e-90	0.396528	0.673731
RAB8B	2.38288e-90	0.161667	1.06918
NEUROG1	2.64393e-90	0.0108286	3.64653
RALYL	4.7266e-90	0.0168038	2.63486
RPL6	8.67875e-90	-0.142812	-0.224137
TCF7L2	2.18069e-89	-0.422522	-0.946232
WFDC2	3.39155e-89	-0.394261	-0.916482
BC024139	7.38565e-89	0.0284275	2.09357
SPINT2	7.38565e-89	-0.338228	-0.912572
SERPINB6A	9.15335e-89	-0.318405	-0.991805
TUBB4A	1.27726e-88	-0.336031	-1.12863
HSP90AB1	1.55449e-88	-0.1556	-0.228192
CGNL1	2.3448e-88	-0.509992	-2.22887
LIN28A	3.28895e-88	-0.252023	-0.41125
HES1	5.79803e-88	-0.371412	-0.97373
DLG1	6.40473e-88	0.291229	0.754613
HNRNPA1	1.87284e-87	0.131546	0.201951
TRIM8	2.56908e-87	0.281911	0.818268
MAML3	3.50065e-87	0.262744	0.804451
SDC3	3.70558e-87	0.0557195	1.6883
NDN	4.69896e-87	0.41519	0.676487
MSX2	8.41733e-87	0.0738146	1.87774
CDCA7	8.83859e-87	-0.232438	-0.451387
GM9930	9.89514e-87	0.00891721	3.16163
IPO5	1.25399e-86	0.255441	0.469742
LACTB	3.61648e-86	0.224096	0.887019
CXCR4	3.91267e-86	0.131146	1.25763
X4933415A04RIK	5.24101e-86	0.0768682
MPP6	5.48423e-86	0.267403	0.479637
CLDN7	8.00676e-86	-0.658758	-3.84056
RAP2A	1.20873e-85	0.237502	0.759891
ATP5L	1.50638e-85	-0.226118	-0.359707
PSAT1	1.5815e-85	0.298449	0.550566
CNTNAP2	1.93762e-85	0.188288	1.22713
ARID3B	3.03655e-85	-0.331364	-0.841396
UTF1	4.05419e-85	-0.952047	-6.41313
SEMA3E	3.44602e-84	-0.827266	-4.89705
KCNE1	4.12935e-84	0.00954596	3.25493
PDLIM1	4.68382e-84	-0.390978	-2.19244
KRTCAP3	5.27009e-84	-0.371476	-2.35746
NDUFA12	5.33947e-84	-0.260238	-0.457487
SHB	8.29455e-84	-0.361676	-1.88609
ZMYND8	1.86911e-83	-0.289232	-0.593849
LFNG	1.97505e-83	0.1583	1.13373
TMED2	3.46801e-83	0.244263	0.42531
FABP5	3.69325e-83	0.164786	0.24287
PCDH1	5.12464e-83	-0.361169	-2.05304
SEPT3	6.92253e-83	0.293983	0.766337
CNBP	8.39014e-83	0.182743	0.282952
NDRG2	9.41788e-83	-0.49325	-3.44507
HIST1H2AP	1.01063e-82	-0.731395	-1.22241
HOXA2	1.05503e-82	-1.11919	-5.25281
ALDH1A2	1.60028e-82	-0.563122	-2.60122
NRP1	3.70019e-82	0.0893446	1.47232
NR2F2	3.84041e-82	0.0894769	-0.0705315
JPH4	4.04474e-82	-0.345011	-1.48478
TMEM163	6.42626e-82	-0.39683	-2.75675
X1700019D03RIK	8.7182e-82	-0.442832
CALCA	1.59908e-81	-0.468336	-2.08078
HNRNPF	2.30577e-81	0.192249	0.319076
LDHA	2.69946e-81	0.120042	0.180777
KRT8	3.12411e-81	-0.347798	-1.36188
F11R	4.23068e-81	-0.329061	-1.33875
PTN	7.92379e-81	0.490365	0.73722
AJAP1	1.32973e-80	0.209753	1.01173
ATP8A1	1.83705e-80	0.0883102	1.33854
GNG3	2.68399e-80	-0.319854	-0.973332
LRRC23	8.05593e-80	0.0184203	2.49224
LHX5	1.70277e-79	-0.498499	-1.45298
MANF	1.97944e-79	0.219761	0.361285
YAF2	2.26383e-79	0.274161	0.576764
EPHA7	3.17345e-79	-0.484035	-1.36872
FGF3	1.01201e-78	-0.538508	-2.51764
ATP5K	1.52209e-78	-0.257288	-0.427258
CAMK2A	2.25057e-78	0.0313534	2.01631
DUSP6	3.2852e-78	0.117494	1.48895
H2-K1	4.63057e-78	0.331542	0.690104
MYH9	5.2837e-78	-0.300626	-0.687138
EMB	7.21333e-78	-0.318169	-0.593576
DSG2	7.21333e-78	-0.48997	-3.81622
COL2A1	1.01998e-77	0.301148	0.865488
CD9	1.0534e-77	0.267909	0.692941
CCDC34	1.28986e-77	-0.213784	-0.369866
MAPK13	1.91028e-77	-0.45152	-3.4268
RPL35	3.61149e-77	-0.207903	-0.31454
MEIS2	5.60008e-77	-0.369804	-0.671235
GM10260	6.17261e-77	-0.224968	-0.326506
X5930412G12RIK	7.22275e-77	0.0619603
LMO4	9.57941e-77	-0.28605	-0.525902
GPC4	1.59155e-76	-0.362578	-2.03461
IGFBP2	1.96998e-76	-0.341401	-0.546003
CACNB3	5.82599e-76	0.140439	0.97177
TLE4	8.64432e-76	0.455174	0.695304
BTF3L4	1.19351e-75	0.209978	0.383339
RBM3	1.51073e-75	0.172866	0.288082
RPS9	6.20121e-75	-0.12232	-0.174841
ZFAND5	6.85003e-75	0.246172	0.459418
ZBTB16	8.69583e-75	0.282733	0.907895
ZCCHC7	9.66001e-75	0.267334	0.580815
H2-KE6	1.05359e-74	0.289143	0.70052
IRX5	1.21661e-74	0.385474	0.567421
FGFR1	1.23034e-74	-0.29297	-0.560859
CTGF	1.36692e-74	0.0587509	1.69637
HIST1H2AK	1.99998e-74	-0.5458	-0.994456
SRP9	1.06848e-73	0.210445	0.365502
OST4	1.25218e-73	0.216288	0.352885
CPE	1.42254e-73	0.25287	0.6982
CACYBP	1.47757e-73	0.181951	0.288687
DACH1	1.72683e-73	-0.369921	-2.20095
RFTN1	5.28955e-73	0.0764166	1.31664
AZIN1	1.27102e-72	0.27181	0.568819
RPS14	1.48556e-72	-0.0882417	-0.129705
RPS27	1.54021e-72	-0.159229	-0.234804
OLIG3	1.99159e-72	-0.965981	-5.2752
PPM1L	2.15496e-72	0.154672	1.00504
FHDC1	2.46473e-72	-0.374792	-2.36593
TMEM218	2.84169e-72	0.182503	0.873983
NLGN3	4.03767e-72	0.0694931	1.4256
DSP	4.19692e-72	-0.340531	-2.17008
WNT3	6.4339e-72	0.0268812	2.14877
RPL34	1.02718e-71	-0.107803	-0.161669
COLEC12	1.77937e-71	-0.290223	-1.14548
RHOBTB2	2.58571e-71	0.0950844	1.20689
CDX2	3.20163e-71		-27.3696
RPL10A	5.68929e-71	-0.1038	-0.154271
RPL8	6.20363e-71	-0.10301	-0.139072
SOX11	6.38017e-71	0.252207	0.387412
BEX4	7.24193e-71	0.200983	0.316996
TSPAN6	9.30858e-71	0.236642	0.432464
DHX32	9.33622e-71	0.200172	0.810148
IRS4	9.58873e-71	0.0422686	-0.100163
PRTG	1.66547e-70	0.306421	0.513848
SFRP5	1.83778e-70	-0.504307	-3.37815
RIC8B	2.65864e-70	0.171766	0.897437
LRP8	3.3981e-70	0.0775577	1.40883
PPP1R16B	5.02744e-70	0.0558808	1.57881
X3632451O06RIK	5.75794e-70	0.21049
GM27032	6.20172e-70	0.130864	1.13299
TSHZ1	1.07671e-69	-0.455747	-2.04135
COX7C	1.23476e-69	-0.154662	-0.243954
TMEM128	1.57552e-69	0.265555	0.545535
MIF	2.94518e-69	-0.114497	-0.161085
GLDC	4.17415e-69	-0.298574	-0.831514
NAA30	4.26414e-69	0.196005	0.844322
EGFL7	4.68098e-69	-0.271963	-0.73583
NOG	6.37372e-69	0.0483444	1.70731
NPL	7.3734e-69	0.0949127	1.19813
CKB	8.2115e-69	-0.382499	-1.09132
TNRC18	2.55424e-68	0.239097	0.828324
SALL4	3.11356e-68	-0.285648	-0.532117
FAM181A	3.11466e-68	0.089282	1.21886
D030056L22RIK	4.07761e-68	0.244151	0.54132
PFN1	4.19513e-68	0.14054	0.224405
FAM117A	6.58361e-68	-0.279945	-1.19273
NKX6-2	6.89499e-68	0.116758	1.67693
GM26700	7.68349e-68	0.039628	1.84953
CABP7	9.11767e-68	-0.557299	-4.24701
TMEM255A	1.18349e-67	0.0154221	2.45362
MYL7	2.17119e-67	-0.310734	-2.15186
KIT	2.20987e-67	0.162708	0.959431
ZFYVE9	2.21451e-67	0.229427	0.739171
ENO2	2.79624e-67	0.0440073	1.60604
MTSS1	4.66347e-67	0.238658	0.818367
TOMM7	5.38123e-67	-0.173742	-0.262672
SRSF9	6.01952e-67	0.188852	0.319753
RSL1D1	6.22051e-67	0.177652	0.286052
PLCH1	1.17365e-66	0.221873	0.781345
RPL13	1.50885e-66	-0.101412	-0.148662
KIF5C	1.53729e-66	-0.266148	-0.692825
MOSPD1	2.12101e-66	0.173544	0.785436
B4GALT1	3.14504e-66	0.114204	1.00604
VCAN	3.74163e-66	0.280201	0.867265
CAR10	3.84891e-66	-0.57786	-3.78112
LGI2	4.32412e-66	-0.287959	-1.29157
PSIP1	5.04119e-66	-0.153099	-0.217287
ASCL1	5.45507e-66	0.0299008	2.61697
RPS21	6.76145e-66	-0.142736	-0.216603
CERCAM	7.82192e-66	0.0680383	1.32395
ZFP422	1.5329e-65	0.29444	0.550015
PRDM12	1.96494e-65	0.0105015	2.83731
HNRNPK	2.02588e-65	0.138715	0.231015
PTPRZ1	2.24738e-65	-0.359931	-1.19821
GNGT2	2.48113e-65	-0.27865	-1.67974
WFDC1	3.36705e-65	0.0064901	3.44856
RGMB	5.0821e-65	0.145933	1.04525
NTF3	8.54667e-65	0.0222346	2.48243
MIR17HG	1.09714e-64	0.330996	0.674726
RHOBTB3	3.29343e-64	0.263256	0.487102
OGFRL1	3.53868e-64	-0.268626	-1.01431
GALT	5.17018e-64	-0.296018	-1.86209
NAV1	5.21036e-64	0.364435	0.763214
EIF1	7.16008e-64	0.107559	0.164212
OSTC	1.01205e-63	0.173235	0.294871
ESRP1	1.11192e-63	-0.466179	-3.65504
KRT18	1.20404e-63	-0.315699	-0.974516
NIP7	1.23117e-63	0.198812	0.364427
FOXO1	1.31936e-63	-0.285873	-1.8195
HIGD1A	2.66555e-63	0.179322	0.281874
SCG5	2.93873e-63	0.205035	0.869269
EIF1A	3.15917e-63	0.208183	0.380274
RSL24D1	4.05597e-63	0.223043	0.428648
PLTP	8.27597e-63	0.0898408	1.20018
CDH2	9.40965e-63	0.501067	0.666058
SLC35F1	1.24426e-62	-0.284811	-1.4747
SPATS2L	1.55628e-62	0.0925796	1.21521
FEZ1	1.7285e-62	0.151992	0.660298
KLF9	1.82308e-62	-0.294848	-1.21608
CD200	2.2709e-62	0.0253032	1.96412
TLX3	3.37858e-62	0.00247802	4.63301
DPYSL4	3.38454e-62	0.102081	1.15978
CRB3	8.49789e-62	-0.405203	-2.95558
SEMA6D	9.02279e-62	0.0527571	1.49401
ARL4A	1.16174e-61	0.314019	0.879451
HOMER3	1.58546e-61	0.195369	0.753608
SEMA3C	1.64e-61	0.0606403	1.42162
ELAVL1	2.33656e-61	0.185271	0.32895
ABLIM1	2.50613e-61	0.22952	0.864463
TM9SF3	2.62782e-61	0.235141	0.449379
EMX2	3.04509e-61	-0.60254	-2.69812
TCFL5	5.3194e-61	-0.258451	-0.693322
RARB	8.1603e-61	-0.458055	-3.57809
KLF3	1.03717e-60	0.325422	0.707892
SH3GL3	1.11463e-60	-0.290341	-2.06081
CDH13	1.13608e-60	-0.26256	-1.47614
EGLN1	1.36735e-60	0.267305	0.502369
SHF	1.71802e-60	0.164591	0.814536
RAB28	2.20745e-60	0.245637	0.620941
GM42637	2.68858e-60	-0.333175	-2.16127
TEX15	3.7183e-60	0.0821081	1.11439
JAG1	3.99947e-60	0.225387	0.837202
TRIB2	5.74245e-60	-0.274648	-1.35749
MYL9	6.23264e-60	-0.269084	-1.42692
TM9SF4	1.03363e-59	0.224677	0.527383
EEF1E1	1.06945e-59	0.239406	0.455746
MSX3	1.16197e-59	-0.684175	-3.28408
RPL36	1.77741e-59	-0.121681	-0.175756
MTAP7D3	2.02573e-59	-0.292109	-1.01903
MRPL34	3.32847e-59	-0.241108	-0.39633
LEF1	3.9331e-59	0.254493	0.720127
VANGL2	5.22317e-59	0.275708	0.551359
FOXD1	6.05352e-59	-0.717653	-2.71718
HNF1B	6.15917e-59	-1.0912	-7.33157
GTF2A2	7.16353e-59	0.183437	0.339789
HS6ST1	7.70799e-59	-0.272197	-0.811996
EML5	1.47961e-58	0.107352	1.09398
RPL31	1.74543e-58	-0.109246	-0.156091
LGALS1	2.00774e-58	-0.27666	-0.745611
MYL6	2.22325e-58	-0.145309	-0.225297
MARCKSL1	2.50942e-58	0.14527	0.221452
VEGFA	3.49276e-58	0.15296	0.878476
TMEM64	3.53402e-58	0.116176	0.923179
NPTX2	3.65862e-58	-0.307559	-1.21272
HSP90AA1	3.71666e-58	-0.163138	-0.212617
ST3GAL6	4.50614e-58	0.0596916	1.34793
B3GNT7	6.97667e-58	-0.337553	-2.44959
LSM2	8.21373e-58	0.152071	0.250823
SCUBE1	8.68933e-58	0.143237	0.864571
GAREM2	8.99122e-58	0.0537218	1.37193
PLS3	1.39983e-57	-0.264967	-0.502747
CCNB1IP1	1.43022e-57	-0.446583	-3.59367
WNT9A	1.60335e-57	0.00668337	3.06706
IQSEC1	2.09238e-57	0.148418	0.823263
RPL18	2.19049e-57	-0.0883991	-0.136216
RNF7	2.26844e-57	0.155291	0.253333
LTBP1	2.45422e-57	-0.269076	-1.11881
ZFP397	2.77419e-57	0.211276	0.638218
BFSP1	3.34896e-57	0.0318038	1.73111
OAZ1	3.56042e-57	0.106673	0.145994
PTP4A2	4.1148e-57	0.219989	0.402751
SERPINH1	5.71214e-57	0.255541	0.446993
BCAP29	9.14962e-57	0.134796	0.92093
SALL1	1.02792e-56	-0.28578	-0.776435
PRSS23	1.04672e-56	-0.326928	-1.50975
MECOM	1.37743e-56	-0.3395	-2.03427
SMIM22	1.43308e-56	-0.268603	-2.0419
FYTTD1	1.76508e-56	0.221529	0.462691
BBIP1	1.80121e-56	0.238571	0.509561
PRR7	2.21484e-56	0.257485	0.597061
SLC7A3	2.48789e-56	-0.302475	-1.53714
NPNT	2.98793e-56	0.0333738	1.68007
SLITRK1	3.34565e-56	0.00821103	2.75098
CELSR2	6.10354e-56	0.21697	0.692846
MSMO1	6.29806e-56	0.199538	0.731572
GALNT1	8.25094e-56	0.302752	0.600958
ADAMTS3	8.76446e-56	0.026693	1.94667
TUBB2B	9.87276e-56	0.328324	0.679204
H2AFY2	1.16137e-55	0.1913	0.358766
RPS15	1.66775e-55	-0.0936027	-0.132527
TAGLN3	3.16239e-55	0.0691943	1.24596
ETV5	3.17951e-55	0.103823	1.15412
WNT5B	3.55475e-55	0.119757	0.974749
MIRG	3.80944e-55	-0.265557	-0.973738
PNP	4.01269e-55	0.200185	0.404756
EMID1	4.79851e-55	0.102626	1.05528
SMS	5.31994e-55	-0.221934	-0.344157
D8ERTD82E	5.34656e-55	-0.256968	-0.906204
PLPPR1	6.56745e-55	-0.283547	-1.97657
NDNL2	8.57299e-55	0.200443	0.432968
ANXA4	9.4827e-55	-0.356125	-3.09451
ROBO3	9.85841e-55	-0.712736	-6.01283
SEPT4	1.20188e-54	0.0669943	1.25981
TOMM5	1.27179e-54	0.169496	0.287353
PPP6C	1.32415e-54	0.214033	0.516498
PAFAH1B2	1.87349e-54	0.224697	0.449947
HMGN5	2.38951e-54	-0.220611	-0.401634
HES3	2.59436e-54	0.334122	0.962663
FABP3	2.66895e-54	-0.250041	-1.66231
PLAGL1	2.67254e-54	-0.357894	-2.447
SASH1	5.2552e-54	0.206112	0.701176
ACRBP	5.69028e-54	-0.251125	-1.10842
IGFBP4	6.68208e-54	0.278949	0.613537
UBE2D3	6.92717e-54	0.149098	0.250667
GREB1	1.25444e-53	0.275503	0.550547
RPL14	1.29144e-53	-0.0844606	-0.121595
ENO1	1.47223e-53	-0.162331	-0.22382
YBX3	1.48088e-53	0.169163	0.297131
RPL38	1.8671e-53	-0.141218	-0.213245
ZFP36L1	1.88031e-53	0.326605	0.552132
GPD2	2.53728e-53	-0.24892	-0.731325
EVA1B	2.57943e-53	-0.250528	-1.08934
RNF152	2.63011e-53	0.0647909	1.43918
GDF10	4.6151e-53	-0.34593	-1.91795
FZD8	4.62108e-53	-0.275428	-1.13723
IDI1	8.12077e-53	0.262895	0.587296
C430049E01RIK	1.00832e-52	-0.313372	-2.89812
SRP14	1.20061e-52	0.149572	0.239621
PIP5K1B	1.2246e-52	0.0412467	1.51004
CACNG4	1.71406e-52	0.182993	0.8267
STK26	1.756e-52	-0.240497	-1.4794
SOX5	2.49888e-52	-0.289157	-1.58873
ANAPC13	2.51688e-52	-0.181274	-0.342534
OXCT1	3.29193e-52	-0.269819	-0.841006
KYNU	4.18469e-52	-0.444301	-3.91426
CLEC2L	4.23023e-52	0.0641539	1.08686
SEMA3F	4.69752e-52	0.0671402	1.2216
CHIC2	5.52095e-52	0.205407	0.391956
BRI3	6.6534e-52	-0.178996	-0.289606
GSC	7.5723e-52	-0.603066	-3.31241
UBE2N	8.02411e-52	0.151341	0.268277
DCUN1D5	8.23113e-52	0.172395	0.314537
RABGGTB	8.61796e-52	0.20136	0.434946
EBNA1BP2	1.13029e-51	0.174887	0.323317
RPL9-PS6	1.43437e-51	0.165875	0.28449
FGF5	1.44932e-51	-0.593822	-4.33166
HSD17B11	3.07634e-51	-0.253696	-2.04563
CMTM7	3.09429e-51	0.212181	0.562617
BEX2	3.63757e-51	0.183985	0.310391
HDAC6	3.80836e-51	-0.262472	-0.606903
FZD4	4.63573e-51	-0.301725	-1.97848
LY6E	5.00403e-51	-0.224378	-0.480164
CAR3	5.54589e-51	0.080037	1.12039
GSTT1	5.7676e-51	-0.270636	-2.3248
TRAM2	7.40469e-51	0.0597466	1.25474
ECHDC2	8.85865e-51	-0.244719	-1.06624
TCEAL8	9.60748e-51	0.182922	0.323927
SCUBE2	1.11286e-50	-0.30261	-1.41375
ATP5E	1.29481e-50	-0.13279	-0.202589
SKAP1	1.3082e-50	0.0122336	2.33584
CPD	1.32452e-50	0.137233	0.768678
TSC22D3	1.65871e-50	0.196949	0.659018
CCDC115	1.71972e-50	0.191706	0.484896
SELENOP	2.23205e-50	-0.340398	-2.10854
MAP2	2.39421e-50	0.114675	1.05552
SLC35G1	3.07475e-50	0.13247	0.805196
MED30	3.44134e-50	0.210425	0.428816
CACNA2D1	5.65336e-50	-0.410783	-4.26649
MPHOSPH8	5.83207e-50	-0.177942	-0.298425
TUBA1B	5.848e-50	0.135256	0.230551
AES	5.96251e-50	-0.166832	-0.382834
MEOX1	9.18736e-50	-0.661048	-4.92025
RPL27-PS3	1.36383e-49	0.155432	0.266397
RAI14	1.43588e-49	0.202553	0.80234
NECTIN2	1.78114e-49	-0.259281	-0.62204
ROBO1	2.27989e-49	0.182929	0.799462
PAK1	2.70109e-49	-0.224134	-0.500192
TMSB4X	3.13764e-49	0.267842	0.399628
GJC1	3.52729e-49	0.24613	0.452021
SLC9A3R1	5.06699e-49	-0.213991	-0.417635
MEX3D	6.13394e-49	0.195957	0.633359
UBE2J2	7.00582e-49	0.167813	0.347388
NHP2L1	1.11991e-48	0.120093	0.183543
CEP170B	1.3478e-48	-0.223328	-1.48539
MT-CO3	1.49319e-48	-0.18677	-0.287882
RBP1	1.65536e-48	-0.181503	-0.379745
NRCAM	2.10673e-48	-0.264522	-1.07552
BNIP3	4.60103e-48	0.229539	0.404568
SON	4.75058e-48	-0.160797	-0.243577
PFN2	6.42659e-48	0.291467	0.53678
REST	7.52112e-48	-0.190107	-0.429162
ACOT7	7.81996e-48	0.207554	0.62731
MXRA7	8.69692e-48	-0.235765	-0.671296
GSTM5	9.0561e-48	0.216109	0.409373
PREX1	1.42192e-47	0.120716	0.828507
CALB2	1.67393e-47	-0.294804	-2.12322
LDHB	1.72878e-47	-0.197227	-0.334098
NBL1	1.91636e-47	-0.273993	-2.2661
GRRP1	1.9565e-47	0.176444	0.797596
SCOC	2.05828e-47	0.201668	0.419195
PJA1	2.13083e-47	0.227155	0.473615
PNMA2	2.52326e-47	-0.209071	-0.953084
CLDN10	2.52684e-47	0.0984054	1.0278
GM9493	2.76293e-47	0.155574	0.264546
LY6H	3.0792e-47	0.0887721	1.0669
TTC28	3.20717e-47	0.159711	0.837608
KDF1	3.50402e-47	-0.362479	-3.80787
TIGD2	3.88578e-47	0.177903	0.621845
PCDH18	4.24585e-47	0.179744	0.794032
MT1	4.53649e-47	-0.287042	-0.888724
PHLDA3	4.64475e-47	-0.331967	-1.2494
SPARCL1	6.69954e-47	-0.417372	-3.12827
MRPL14	7.00196e-47	0.183101	0.343726
LSR	7.92895e-47	-0.218115	-0.501893
C130073E24RIK	9.02055e-47	0.0147931	2.28919
PLATR10	1.07363e-46	-0.567706	-5.34401
GATSL2	1.23247e-46	-0.220568	-0.938383
GM10036	1.35138e-46	0.177854	0.328224
MIR124-2HG	1.6259e-46	0.235634	0.70245
FBN2	1.78624e-46	-0.268664	-0.879758
EFNB1	1.91735e-46	0.295103	0.56458
SKAP2	1.92775e-46	-0.247187	-0.877746
RHOA	2.31736e-46	0.136632	0.216771
PPP1R1A	2.88267e-46	0.221672	0.489061
PLCXD1	4.05073e-46	-0.280532	-2.90039
ATP5B	4.18677e-46	-0.15213	-0.218782
EPB41L5	4.4699e-46	0.196647	0.577971
MAGOH	4.58455e-46	0.136071	0.239633
CDC42	4.96565e-46	0.13821	0.246499
FAM53B	5.04679e-46	-0.229574	-0.788966
TSPAN17	6.91447e-46	-0.556215	-5.40172
ALAD	7.90346e-46	0.197968	0.440071
TTR	8.01118e-46	-0.476168	-3.6617
CEP55	1.11166e-45	0.139685	0.767396
RRM2	1.26652e-45	0.202731	0.343095
GSC2	1.72886e-45	0.0257612	1.73276
DDT	1.86957e-45	-0.16804	-0.285919
TCEAL1	2.01614e-45	0.108397	0.785212
HCFC1R1	2.51437e-45	-0.219842	-0.677901
POLR2M	2.57194e-45	0.14932	0.255834
CPNE2	2.61829e-45	0.0829967	1.01552
RHEB	3.07008e-45	0.176134	0.336769
SLITRK2	3.12247e-45	0.0344231	1.4418
CFAP20	3.13724e-45	0.176324	0.338076
RPS19	5.31689e-45	-0.078234	-0.107031
SIVA1	5.54137e-45	-0.130963	-0.213098
CALD1	5.7307e-45	-0.224258	-0.478208
NUDT19	6.8883e-45	0.199678	0.476776
APLP2	8.75942e-45	-0.184646	-0.370434
LRBA	8.90154e-45	0.0863551	0.959042
UBE2I	1.02371e-44	0.108724	0.170225
INSIG1	1.04549e-44	0.0952419	0.940011
CDC25B	1.19085e-44	0.0894106	0.730771
AGPAT2	1.20369e-44	-0.202689	-1.17464
POLR2L	1.20685e-44	-0.22879	-0.506485
RNF165	1.35446e-44	-0.263477	-0.609349
MED21	1.43436e-44	0.193389	0.369252
ZIC1	1.81463e-44	0.0652596	1.58719
PGM2	1.83703e-44	-0.230381	-0.655398
DRAXIN	1.86536e-44	0.0358653	1.37831
PRRX1	1.86856e-44	-0.23313	-1.5758
DTX1	2.04436e-44	-0.248902	-2.26847
CUEDC1	2.42728e-44	0.246481	0.643861
VAPA	2.58136e-44	0.141811	0.251012
FAM136A	2.60447e-44	0.155306	0.273472
TMEM159	3.02815e-44	0.0712262	0.807749
EIF5	3.03455e-44	0.11574	0.190159
CDC42EP4	3.55385e-44	-0.216922	-1.08248
RCN2	3.94787e-44	0.221158	0.405816
PHLDB2	5.73007e-44	0.165222	0.620489
DNAJA2	5.91558e-44	0.156553	0.276351
GM16286	6.07712e-44	0.160054	0.29917
GABARAPL2	7.14275e-44	0.177591	0.333758
WDR83OS	7.67773e-44	0.197775	0.396689
KCNH5	9.43367e-44	0.0107002	2.36327
LHPP	1.16008e-43	-0.235648	-0.758351
GSTT2	1.18215e-43	-0.208032	-1.23214
ZFP985	1.24846e-43	-0.221048	-1.58192
ZFP800	1.98865e-43	0.172046	0.730026
ATP5A1	2.06412e-43	-0.138842	-0.186365
CD59A	2.15105e-43	0.124347	0.827683
TIAM1	2.26099e-43	0.152588	0.728682
COQ2	2.36481e-43	0.186724	0.550233
PET100	2.36766e-43	-0.192579	-0.469363
TYRO3	2.9086e-43	-0.221483	-0.682035
KDELR2	3.07892e-43	0.198469	0.380784
FABP7	3.54029e-43	-0.278777	-1.17236
PRSS8	3.55408e-43	-0.223055	-2.00676
IGFBPL1	3.96757e-43	0.169126	0.733129
NTRK3	3.99451e-43	0.0690743	1.11836
VGLL3	4.01021e-43	-0.915045	-3.65921
PLXNC1	4.71272e-43	0.0976668	0.914897
PPA1	4.72243e-43	0.1375	0.241668
MKNK1	5.25875e-43	0.0664717	1.04948
DCAF12L1	5.90148e-43	0.0673534	0.993606
EFCAB6	6.15199e-43	-0.337013	-3.63162
PFDN4	6.3716e-43	0.178503	0.353956
EFR3A	6.4045e-43	0.168752	0.483023
ARHGAP5	6.4109e-43	0.185958	0.369543
NUDCD2	6.4253e-43	0.146847	0.272489
RPL27	7.93393e-43	0.131413	0.227331
NDUFC1	1.08579e-42	-0.145289	-0.255261
FXYD7	1.2599e-42	-0.274364	-2.67211
DNAJC3	1.34661e-42	0.19928	0.4374
FTL1	1.6538e-42	-0.102438	-0.144257
PLEC	1.88261e-42	-0.223277	-0.836615
SAR1B	1.98206e-42	0.167179	0.350754
X3110082J24RIK	2.01209e-42	0.034468
TSNAX	2.06731e-42	0.208494	0.4725
CAPN2	2.5623e-42	0.120799	0.726555
VAMP8	2.93554e-42	-0.224879	-0.865876
S100A10	3.9316e-42	-0.224764	-0.701171
CPNE5	5.62072e-42	0.114673	0.844917
ZFP706	6.09914e-42	0.141092	0.230953
RAB12	6.33394e-42	0.180267	0.562665
MED31	6.91077e-42	0.196602	0.406249
TMEM45A	7.39524e-42	0.0539041	1.14947
NFIB	7.55943e-42	-0.331921	-2.83231
YWHAQ	8.06856e-42	0.119347	0.201097
PRMT8	8.25981e-42	-0.199307	-1.59785
TRAPPC4	1.02031e-41	0.151693	0.278501
FZD9	1.06043e-41	0.0772067	1.0273
PPDPF	1.26925e-41	-0.160889	-0.299777
DOCK7	3.25953e-41	0.207714	0.510896
X9530068E07RIK	3.26103e-41	0.207338
RAP1A	4.06585e-41	0.173797	0.352947
PDIA6	4.11141e-41	0.142115	0.222766
GSTM7	4.59518e-41	-0.243768	-2.62153
ERBIN	5.65128e-41	0.15877	0.753254
LAMP2	6.62716e-41	0.166263	0.667253
LLGL1	7.09306e-41	0.180808	0.516958
HMGA1-RS1	7.15211e-41	-0.209485	-0.423457
TUBB3	7.54642e-41	-0.261771	-0.685551
SALL2	8.02724e-41	0.270327	0.510829
BCAS2	9.62337e-41	0.133519	0.208919
PEA15A	9.63785e-41	0.194191	0.570873
MTAP	1.06609e-40	0.197389	0.381777
GNAZ	1.06609e-40	0.0635125	1.11313
DYNC2LI1	1.2569e-40	0.162268	0.593554
GPBP1	1.97321e-40	0.180928	0.359776
MOV10	2.45669e-40	-0.23461	-2.42134
MYRF	2.48477e-40	-0.197531	-1.47766
LAMTOR4	2.48941e-40	-0.170952	-0.350197
ARL5B	2.64576e-40	0.170537	0.579316
BZW2	2.74988e-40	0.144396	0.268319
EIF1B	3.08299e-40	0.144307	0.245745
TROVE2	3.12756e-40	0.191133	0.576592
MYO10	3.59424e-40	-0.227424	-0.440698
PDE1B	6.38456e-40	0.0323899	1.42785
RPS5	7.76454e-40	-0.0759949	-0.115439
SF3B6	8.95034e-40	0.127907	0.212945
H2AFJ	8.95034e-40	-0.158839	-0.259252
CDC26	1.1034e-39	0.148824	0.272113
ARF4	1.35929e-39	0.163278	0.309856
EID1	1.38314e-39	0.157938	0.273505
GAP43	1.62157e-39	-0.231993	-0.750885
MGARP	1.76391e-39	0.149878	0.677228
CYCS	2.03634e-39	0.130576	0.213711
MAPKAPK2	2.20185e-39	0.173983	0.616424
MID1	2.29884e-39	0.25085	0.579859
MTHFD2	3.03442e-39	0.18867	0.425679
FLNA	3.23786e-39	-0.231109	-0.470149
SPON1	3.28699e-39	0.200411	0.812735
IFITM2	3.50751e-39	-0.191875	-0.295736
FLNB	3.7672e-39	-0.20176	-0.91774
ZNRF3	3.85741e-39	0.0954439	0.871765
BTF3	4.45268e-39	0.0856312	0.135875
RBM11	5.65572e-39	0.0254231	1.66157
GLIPR2	5.75662e-39	-0.206296	-1.39462
ATPIF1	6.89224e-39	-0.130576	-0.203356
FAM189A2	6.94582e-39	0.0405719	1.36043
LMAN1	7.55663e-39	-0.188172	-0.348441
COL18A1	7.82745e-39	-0.192688	-0.396569
UQCR10	8.11859e-39	-0.133402	-0.206575
UNC5C	9.54996e-39	0.0328957	1.55422
ARX	1.0336e-38	-0.526727	-3.14256
BRSK2	1.07145e-38	0.0664099	1.04428
USP6NL	1.16708e-38	0.141477	0.637669
CAMK2N1	1.19535e-38	-0.209133	-1.55744
EIF4EBP1	1.31263e-38	-0.161716	-0.264609
ERDR1	1.33224e-38	0.179505	0.305945
UNC5B	1.42689e-38	-0.196722	-1.50748
COL9A2	1.57594e-38	-0.248215	-2.44834
PTAR1	1.76941e-38	0.0585594	1.0829
H19	2.01442e-38	-0.224716	-0.813337
RCN3	2.13725e-38	-0.204673	-0.561395
ARHGEF28	3.57119e-38	-0.226336	-2.08875
WSB1	3.70415e-38	0.195832	0.488484
CELF2	3.7934e-38	0.266251	0.588348
TRPM6	4.24382e-38	0.00617984	2.69902
ITGB5	4.35167e-38	-0.213338	-0.90029
MCF2	4.61851e-38	-0.221775	-1.05491
PLEKHG1	4.69428e-38	0.0530626	1.11599
URAH	5.16456e-38	-0.183508	-1.57443
PRELID2	5.32756e-38	0.226865	0.456834
PLIN3	5.43461e-38	0.223254	0.532807
XBP1	6.19113e-38	0.189621	0.47992
DCUN1D1	6.25629e-38	0.190968	0.453045
HSD17B12	6.92417e-38	0.165723	0.349809
SMOC1	7.93258e-38	-0.221436	-1.3458
LSM5	9.0142e-38	0.123667	0.215696
TCEA3	9.62764e-38	-0.214498	-1.74906
CENPQ	9.92429e-38	0.20453	0.495003
LRIG3	1.00571e-37	-0.21295	-0.678773
HIST1H2AE	1.0097e-37	-0.333422	-0.609653
MAPT	1.25028e-37	0.0135418	2.0355
KTI12	1.31859e-37	0.198711	0.410745
RPL41	1.40211e-37	-0.0897587	-0.141161
AP1S1	1.42171e-37	0.167957	0.381711
UBXN1	1.63028e-37	0.124213	0.209558
KRAS	1.74667e-37	0.162176	0.305882
FARP1	1.79823e-37	0.136648	0.703993
AMD1	2.07083e-37	0.171169	0.36743
NCAM1	2.11232e-37	-0.222223	-0.708113
TFE3	2.16694e-37	-0.207558	-0.644359
ST8SIA3	2.2437e-37	-0.178662	-0.715929
ARL3	2.32645e-37	0.151938	0.303073
ODC1	3.02283e-37	0.149684	0.268027
DLL3	3.52508e-37	0.0380433	1.07759
TMED7	3.86366e-37	0.191591	0.429975
SPRED2	4.08306e-37	0.145646	0.624948
RNH1	4.29973e-37	-0.194009	-0.574937
ZFP385A	4.6564e-37	0.126227	0.700859
CTH	4.99615e-37	0.137341	0.696649
PDLIM2	5.08737e-37	-0.180271	-1.37049
SOD2	6.07444e-37	0.157462	0.334664
ARHGAP6	6.40488e-37	0.0099918	2.35922
PARVB	6.43888e-37	-0.179296	-1.50925
CMAS	8.32741e-37	0.19675	0.45322
GM5786	9.04501e-37	0.179285	0.507988
POLR2F	9.4491e-37	0.113985	0.183557
EPHA8	1.02741e-36	-0.232847	-2.59402
RNF130	1.038e-36	0.203056	0.511211
ZMIZ1	1.04545e-36	0.213437	0.496662
GM10020	1.21691e-36	-0.213497	-0.521667
MAF	1.30496e-36	-0.379859	-1.87428
X1700025G04RIK	1.31915e-36	0.217908
TRMT10C	1.38704e-36	0.212467	0.470773
CCDC177	1.68481e-36	0.139002	0.719561
BCCIP	1.9443e-36	0.171683	0.332544
PKIG	2.05749e-36	0.175725	0.326134
FAU	2.08759e-36	-0.0866738	-0.136049
PHOX2A	2.15265e-36	-0.251698	-1.40587
PDGFA	2.16155e-36	-0.218166	-0.463517
CHRNA4	2.17863e-36	-0.184057	-1.74981
HSPA4L	2.21874e-36	0.171338	0.702086
TESC	2.39536e-36	-0.20054	-2.14843
PTP4A1	2.65735e-36	0.188161	0.381756
TCEAL5	3.03595e-36	-0.183029	-0.947248
TUBA4A	3.57672e-36	-0.192718	-1.79152
SDC4	3.86077e-36	0.167084	0.620481
STOX2	4.3275e-36	0.247027	0.527359
TMEM51	5.04744e-36	-0.195822	-1.90135
NDUFS4	7.20962e-36	-0.13846	-0.231406
MAGI1	7.32612e-36	-0.1945	-0.691215
CKAP4	7.416e-36	0.198895	0.402226
NPM1	7.78374e-36	0.0773808	0.128785
SRRM4	7.96331e-36	0.0263995	0.588062
H2AFZ	8.83442e-36	0.0773636	0.0990728
SLC7A7	8.83442e-36	-0.250811	-2.44382
ATOX1	8.9673e-36	-0.137197	-0.220834
DQX1	9.78783e-36	-0.158551	-0.738829
NFE2L2	9.99205e-36	-0.198122	-0.669892
GM8797	1.26176e-35	0.183108	0.374272
MPC1	1.38059e-35	0.106887	0.739583
BACH1	1.50837e-35	0.167778	0.609501
CFAP97	1.57085e-35	0.160666	0.517612
RPL13A	1.7678e-35	-0.148341	-0.223567
CRIP1	1.93102e-35	-0.203803	-0.793009
TUBB6	2.03883e-35	-0.195221	-0.64585
ATP5O	2.06796e-35	-0.130417	-0.189496
CACNA2D3	2.20127e-35	0.00543547	2.71984
RFX7	2.21708e-35	0.171174	0.469918
WASF3	2.29198e-35	0.151367	0.548713
RHPN2	2.47722e-35	-0.197195	-1.14481
X5330434G04RIK	2.95407e-35	0.155818
SBK1	3.27736e-35	0.153952	0.613494
MEIS1	3.85637e-35	0.149017	0.743087
GADD45G	4.07113e-35	0.0360494	1.17334
KLF5	4.18018e-35	-0.270945	-3.06637
LRRN4	4.22006e-35	-0.177101	-1.55626
ISM1	4.94759e-35	0.0256557	1.63101
OTUB1	5.01357e-35	0.171028	0.366189
PNOC	6.36426e-35	0.00639529	2.54979
GLI3	7.06085e-35	0.203997	0.506791
EIF4E	7.07656e-35	0.134028	0.262484
LLGL2	9.25794e-35	-0.192311	-1.48336
TGFB2	1.06102e-34	-0.43087	-2.49773
ZBED3	1.23706e-34	0.125979	0.687492
NDUFB7	1.357e-34	-0.126608	-0.194297
CELA1	1.39137e-34	0.0212201	1.69279
CCDC112	1.52237e-34	-0.198308	-0.569766
ORC6	1.75976e-34	0.158394	0.287776
TIPRL	1.76203e-34	0.164653	0.371211
SELENOF	2.69659e-34	0.136888	0.250406
KIRREL	2.72604e-34	0.114536	0.742895
STAP2	3.13354e-34	-0.153863	-1.09071
GRN	3.30765e-34	-0.183097	-0.778206
VEZF1	3.55564e-34	0.187719	0.376046
RREB1	3.56224e-34	0.101481	0.736345
MYT1L	4.44364e-34	0.0204427	1.67764
EI24	5.05587e-34	0.159642	0.393937
SLITRK6	5.80512e-34	0.015393	1.82389
NR2E1	6.15087e-34	-0.627937	-4.97904
EMC2	6.25464e-34	0.153166	0.336907
KLC3	6.79371e-34	-0.17038	-1.24573
ENO3	7.49416e-34	0.148011	0.38947
TCAF1	8.28896e-34	0.186011	0.472661
PDCD5	8.41981e-34	0.122761	0.200186
SCD2	9.00192e-34	0.194935	0.372551
POLR2H	9.36942e-34	0.133194	0.257239
MESDC1	9.88539e-34	0.123234	0.532225
WBP5	9.89329e-34	-0.127846	-0.201765
ST14	1.08958e-33	-0.298513	-4.02931
HSPG2	1.09176e-33	-0.165467	-1.2532
LRRN2	1.31064e-33	-0.200319	-2.18977
AKIRIN1	1.59584e-33	0.161496	0.365677
CBX3	1.59584e-33	0.141774	0.205921
INPP5F	1.75037e-33	0.151214	0.567623
RACK1	1.89917e-33	-0.0929629	-0.110889
METTL9	1.92948e-33	0.133323	0.225256
NDUFA11	2.01417e-33	-0.123636	-0.235066
ZIC4	2.34296e-33	0.0134857	2.01649
PCYT1B	2.48875e-33	-0.167196	-1.4761
FSD1L	2.50301e-33	0.138392	0.653881
ME3	2.65946e-33	-0.233106	-2.23929
SMAD1	2.68252e-33	0.175146	0.517355
HPGD	2.75625e-33	0.00325566	3.38572
PRDX1	2.8565e-33	-0.0860072	-0.125725
G3BP1	2.88632e-33	0.12246	0.23635
MALAT1	2.92902e-33	-0.2143	-0.315968
CKS1B	3.10776e-33	0.114527	0.196803
LIX1L	3.18211e-33	0.111128	0.741336
ACOT13	3.24185e-33	-0.188463	-0.582396
CDH22	4.1581e-33	0.0164341	1.72963
SGTB	4.48097e-33	0.0769515	0.91407
AK3	5.11369e-33	0.0965796	0.751034
HOXA3	5.9805e-33	-0.450795	-4.87643
CCDC50	6.01499e-33	0.171532	0.333152
GM2000	6.65815e-33	0.133637	0.24155
HOXB4	7.31e-33	-1.2355	-8.54233
CFC1	8.20827e-33	-0.631958	-5.06075
SIKE1	8.22645e-33	0.186195	0.441255
TNFAIP3	8.57287e-33	0.00871357	2.17518
L1CAM	9.03076e-33	0.0195851	1.63329
NXN	9.10251e-33	0.2006	0.498442
MDFI	9.45365e-33	0.0835137	0.778611
RPL39	1.0044e-32	-0.0867245	-0.131166
RPRM	1.0081e-32	-0.20212	-0.795724
KLF2	1.03466e-32	-0.194579	-1.87307
IMPA2	1.04908e-32	-0.176939	-0.786629
KCNJ12	1.07517e-32	-0.187703	-2.0485
SERF2	1.38619e-32	-0.0805377	-0.134959
TTC3	1.39628e-32	0.142105	0.227665
DLGAP3	1.43734e-32	-0.173721	-2.06494
COX5B	1.49099e-32	-0.114686	-0.180582
MAD2L1	1.62874e-32	0.164911	0.377013
UBE2D2A	1.63426e-32	0.125246	0.230707
X5730409E04RIK	1.82442e-32	-0.163623
CCSER1	1.91627e-32	0.00655492	2.18106
PPP1R35	1.95199e-32	0.162485	0.403397
ELOVL2	2.17436e-32	0.11146	0.736581
FRAT2	2.18967e-32	-0.195401	-0.489177
YAE1D1	2.19702e-32	0.159776	0.32695
DST	2.61564e-32	-0.228276	-0.49066
MT2	2.66082e-32	-0.18792	-1.18572
RPS2	2.69259e-32	0.0887273	0.125475
CYSTM1	2.82443e-32	-0.180332	-0.953406
LSM3	2.88875e-32	0.107665	0.177007
ELAVL3	2.90466e-32	-0.111311	-0.703898
MRPL50	2.92715e-32	0.161193	0.349129
FAM214B	3.12293e-32	0.0808462	0.820784
HACD1	3.20187e-32	0.161016	0.362133
PPID	3.47983e-32	0.129807	0.229066
WNT7B	3.51291e-32	0.0311482	1.16382
PEX2	3.67301e-32	0.176099	0.466027
BMI1	3.83577e-32	0.133492	0.615743
PCK2	4.78689e-32	-0.174307	-0.774835
ITM2A	5.13414e-32	0.113673	0.400359
FOLR1	8.49607e-32	0.0326993	1.33108
RPS6KA6	9.1938e-32	0.162277	0.44471
LIN28B	9.69255e-32	0.18793	0.386794
EGR2	9.81098e-32	-0.994174	-4.79448
IBTK	1.00215e-31	0.143345	0.49972
TFG	1.27053e-31	0.166395	0.342157
LRP2	1.35852e-31	-0.211966	-0.557908
MS4A4D	1.50498e-31	-0.167443	-1.94266
EXOSC3	1.52576e-31	0.147642	0.307584
HMGN1	1.54969e-31	0.0664035	0.0871943
GYG	1.62625e-31	0.134056	0.506186
PSME1	1.6389e-31	-0.16042	-0.346616
PRKRIR	1.69411e-31	0.167038	0.384532
A830018L16RIK	1.89977e-31	-0.184222	-1.0697
GM6792	1.9892e-31		-24.9393
PHPT1	2.0222e-31	0.152937	0.425086
FAM162A	2.37733e-31	0.123611	0.182323
ALPL	2.49948e-31	-0.188736	-0.644839
FOXG1	2.56596e-31	-0.427605	-2.88504
GATM	2.7976e-31	0.0961811	0.797084
CECR2	3.21601e-31	0.16401	0.346437
CSNK1A1	3.62053e-31	0.11798	0.19754
SNX1	3.70817e-31	0.159752	0.483094
GOLGA7	3.77268e-31	0.167373	0.354292
PRICKLE1	3.9064e-31	-0.193742	-1.76228
DLL1	3.95816e-31	0.0833444	1.00267
HERPUD1	4.11941e-31	0.123909	0.554702
THOC7	4.53131e-31	0.125003	0.198775
NREP	4.5855e-31	-0.204838	-0.5184
LYRM4	5.20919e-31	0.096761	0.642374
HOXB3	6.17601e-31	0.0939438	-5.4224
ZDHHC2	6.36326e-31	-0.180038	-0.686891
GM2694	6.5838e-31	0.268262	0.466157
LZIC	7.17806e-31	0.138179	0.503881
OPCML	7.2504e-31	-0.246044	-1.40048
CFL2	1.06114e-30	0.169612	0.352052
TOP2B	1.1102e-30	0.182733	0.415819
EYA2	1.12331e-30	-0.174183	-1.60917
HPN	1.15445e-30	-0.215625	-2.71771
EMC6	1.16219e-30	0.121868	0.220902
RER1	1.27845e-30	0.145483	0.288425
PPL	1.33578e-30	-0.693786	-6.49132
SLC24A2	1.38047e-30	0.008149	2.26111
HMGCS1	1.79929e-30	0.130654	0.371214
STRAP	1.82788e-30	0.124163	0.236863
RSPO3	1.99246e-30	-0.146135	-1.61
TXNRD3	2.01734e-30	0.0597769	0.945185
CHD3OS	2.08638e-30	-0.183108	-0.525056
NOTCH1	2.22439e-30	0.113518	0.608866
ATP6V0E2	2.26904e-30	0.074508	0.792838
CENPV	2.3376e-30	0.162936	0.553559
TFRC	2.34159e-30	0.172209	0.429267
UBE3A	2.92213e-30	0.138869	0.253726
TUSC3	2.9936e-30	0.170232	0.389743
TCF7	3.81119e-30	0.117968	0.662752
FRZB	3.85365e-30	-0.175942	-0.886591
PCSK2	4.10827e-30	-0.192055	-1.43936
RALA	4.12581e-30	0.130929	0.243714
FAM213B	4.16285e-30	0.132042	0.489889
ZCCHC11	4.55734e-30	0.165102	0.329119
ERO1L	5.2428e-30	0.15607	0.512933
PBK	5.4835e-30	0.164445	0.433292
EPB41L3	5.51538e-30	-0.166299	-0.816518
QPRT	5.75373e-30	-0.174773	-0.605991
GM3550	6.0786e-30	0.149069	0.466065
ZWINT	7.69943e-30	0.156243	0.315235
RAPH1	7.83588e-30	0.18863	0.498161
NDUFA10	7.9373e-30	-0.137301	-0.267774
NUBPL	8.74184e-30	0.147275	0.408499
POLR3K	8.93088e-30	0.144024	0.294344
PWWP2A	9.08076e-30	0.152026	0.356679
SCG3	9.10135e-30	0.0273474	1.29104
JAKMIP1	9.93111e-30	-0.197878	-2.08903
NOC2L	1.04776e-29	0.159256	0.356675
GPRC5C	1.14333e-29	-0.199794	-0.69344
PYCARD	1.16436e-29	-0.180939	-0.776202
HCLS1	1.16506e-29	0.00401128	2.78896
MAPK10	1.30322e-29	-0.222425	-2.05576
PPP1R2	1.3106e-29	0.135881	0.270855
PSMG3	1.39428e-29	0.149187	0.332365
CKS2	1.40145e-29	0.180565	0.345088
SPR	1.44465e-29	-0.164092	-0.377721
FKBP8	1.45641e-29	-0.138181	-0.231293
MAPK3	1.52451e-29	-0.155621	-0.328499
IFITM3	1.53504e-29	-0.216725	-0.585602
COX6B2	1.56492e-29	-0.180524	-0.536989
EMG1	1.57576e-29	0.119635	0.216934
PDK1	1.61036e-29	0.168282	0.443992
USP1	1.66483e-29	0.156835	0.311521
YRDC	1.67424e-29	0.184425	0.399035
KITL	1.76315e-29	-0.181778	-1.41225
AQP11	1.80129e-29	-0.177693	-0.771691
SOX1	2.14394e-29	-0.17563	-0.368569
RBM38	2.18047e-29	0.141906	0.544874
X4933434E20RIK	2.36128e-29	0.191581
CELSR1	2.38884e-29	0.162513	0.617353
RAVER2	2.50057e-29	0.117891	0.626057
CNTN2	2.55261e-29	-0.228344	-2.79604
RBFOX1	2.60473e-29	-0.226688	-3.05269
THSD7A	2.78429e-29	-0.183754	-1.41611
TBC1D9	2.7999e-29	0.0245936	1.35585
VGLL4	2.99814e-29	0.155952	0.572866
LDHC	3.26341e-29	-0.154367	-2.02192
PGM2L1	3.5579e-29	0.0909964	0.747376
BAZ1A	3.71228e-29	0.230315	0.511388
FAM19A1	4.00535e-29	-0.612838	-5.02394
KCNA1	4.0536e-29	0.0393443	1.4386
HSPD1	4.27119e-29	0.106489	0.167234
MPZL2	4.27119e-29	-0.206053	-2.71615
EPHX2	4.7868e-29	-0.179901	-1.87791
FKBP11	5.12313e-29	0.196345	0.426491
POLR1D	5.32989e-29	0.105919	0.164406
PPP1CA	6.36205e-29	-0.0957814	-0.150492
SFR1	6.39774e-29	-0.103085	-0.158293
PLA2G16	6.42392e-29	-0.166424	-0.897571
NAE1	6.60792e-29	0.147788	0.307757
ANXA11	6.66492e-29	-0.151847	-1.36002
CHD1	7.88467e-29	0.13121	0.223683
ZEB2	8.30941e-29	-0.191225	-0.334214
BSPRY	8.68466e-29	-0.191926	-2.4317
SRSF6	9.76281e-29	0.118183	0.234964
TNFAIP1	1.03715e-28	0.15909	0.430572
HIST3H2BA	1.05709e-28	-0.183145	-0.518828
NRGN	1.06759e-28	-0.174277	-1.64008
WBP4	1.21972e-28	0.134957	0.27718
ORMDL3	1.23794e-28	0.14836	0.432095
CYTH2	1.34467e-28	0.139383	0.355034
HES6	1.34903e-28	0.0934155	0.421665
MED6	1.35012e-28	0.133559	0.385387
X2410015M20RIK	1.39338e-28	-0.117041
HIST1H4H	1.53271e-28	-0.188424	-0.814019
CRABP2	1.53737e-28	0.295702	0.440076
ATN1	1.62595e-28	0.113912	0.559673
NRIP3	1.63663e-28	-0.191372	-1.89993
PRPS2	1.8077e-28	-0.176239	-0.468896
DHRS3	2.05228e-28	-0.262436	-3.27603
SHTN1	2.19955e-28	-0.18658	-1.71579
MSRB2	2.36542e-28	-0.148468	-1.2432
SFPQ	2.4321e-28	0.12207	0.212459
ZSWIM6	2.51821e-28	0.166696	0.526624
IPO7	2.76628e-28	0.15826	0.345871
CTCF	2.92893e-28	-0.123697	-0.190672
DNAJB11	3.08738e-28	0.133698	0.276326
X1300002E11RIK	3.30455e-28	0.135629
SORD	3.48505e-28	-0.14168	-1.32444
UNC50	3.73881e-28	0.188452	0.400972
LSM1	3.87091e-28	0.137218	0.27071
PIPOX	4.00344e-28	-0.160833	-0.805744
EDN1	4.02116e-28	-0.222496	-1.61703
PPP4C	4.12865e-28	0.144484	0.307085
METTL10	4.36288e-28	0.149241	0.444503
RPS12-PS3	4.37746e-28	0.0856766	0.146416
GLS	4.58193e-28	0.191186	0.469028
HMGA2	5.05634e-28	0.181474	0.329682
B830012L14RIK	5.47895e-28	-0.151896	-1.02468
DNMT3A	5.9464e-28	-0.17917	-0.435868
ATP2B4	6.18875e-28	-0.167745	-1.75794
TRIM54	6.39454e-28	-0.142468	-1.38517
WIPF3	6.47908e-28	-0.14346	-1.09122
PIR	6.53891e-28	-0.158398	-0.627493
EIF2S3X	6.742e-28	0.162191	0.346558
RBMS3	6.94539e-28	0.054786	0.884039
MYO5B	6.96116e-28	0.0543097	0.867122
ARID5B	7.03451e-28	-0.152018	-0.968317
AK4	7.68075e-28	0.170845	0.451844
NDFIP2	8.33154e-28	0.151211	0.436736
PMF1	8.74722e-28	-0.135415	-0.274824
FCOR	8.80813e-28	-0.160957	-0.66544
BC031181	9.16807e-28	0.132131	0.272318
ATP6V1G1	9.38114e-28	0.112169	0.188979
X1810058I24RIK	9.40753e-28	-0.120709
ETFA	9.48528e-28	-0.17414	-0.474534
EPHA1	9.48528e-28	-0.180208	-1.51371
COMMD3	9.54116e-28	-0.17816	-0.487157
RHOC	1.17496e-27	-0.165068	-0.500134
GOLT1B	1.24306e-27	0.161911	0.408963
TRAP1A	1.27743e-27	-0.248461	-3.28455
DYNC1H1	1.32782e-27	-0.190258	-0.409018
RPS11	1.33097e-27	-0.0560279	-0.0926998
ELAVL2	1.47073e-27	0.169013	0.494524
ANP32E	1.49909e-27	0.127487	0.243086
FRAS1	1.54449e-27	-0.156994	-0.699853
TTYH1	1.55239e-27	-0.143067	-1.14839
GNAI3	1.55849e-27	0.140604	0.296946
ARHGEF15	1.74804e-27	-0.141871	-1.63526
AKT1	1.81408e-27	0.143218	0.47939
EIF3K	1.89252e-27	-0.102732	-0.151774
TSC22D1	1.99146e-27	0.175629	0.332896
NEUROG2	2.10369e-27	0.0232633	1.88768
SF3B2	2.16519e-27	-0.104832	-0.142847
GAL	2.5512e-27	-0.295811	-3.11449
NAA50	2.5554e-27	0.134769	0.261992
CNN1	2.6859e-27	-0.152168	-2.03529
RFC4	3.03087e-27	0.131352	0.247855
UBB	3.0803e-27	-0.132033	-0.182888
ISOC1	3.08383e-27	0.163963	0.371556
RBM17	3.10656e-27	0.117859	0.212133
CRB2	3.20262e-27	0.117515	0.645939
EWSR1	3.23638e-27	0.126957	0.248904
PAPSS1	3.45555e-27	0.149151	0.397859
TSN	3.58506e-27	0.105793	0.174826
MAFB	3.6353e-27	-0.350925	-2.08705
JMJD6	3.70009e-27	0.148159	0.324352
DTX4	3.75649e-27	0.120782	0.634046
SIK1	3.99494e-27	0.0514947	0.968925
SIX6	4.22624e-27	-0.468873	-3.02881
MIDN	4.23213e-27	0.159372	0.363757
NFIA	4.24197e-27	0.012971	1.95112
NECTIN3	4.4821e-27	0.176807	0.383281
UBE2V2	4.72264e-27	0.122974	0.226671
RDH10	5.56827e-27	0.100958	0.779958
TMEM168	5.58551e-27	0.112705	0.554338
AKR1E1	5.84784e-27	0.147933	0.477607
FIS1	6.25917e-27	-0.117615	-0.217832
CYP51	6.37388e-27	0.144825	0.487545
GUK1	6.522e-27	0.123014	0.22045
CAPRIN1	6.58924e-27	0.141537	0.244947
NEDD9	6.68222e-27	0.0477731	0.770425
GKAP1	6.72657e-27	0.147381	0.323889
ATP5G2	7.31612e-27	-0.0790319	-0.125183
USH1C	8.17586e-27	0.0861228	0.657785
TSTD3	8.33566e-27	0.0967955	0.486891
GM6133	9.04785e-27	0.18182	0.448027
LRRC7	9.32118e-27	-0.187096	-2.40756
ZFAND4	9.34685e-27	0.0517511	0.896873
SEMA3A	9.42494e-27	-0.166993	-1.42296
YWHAZ	9.80408e-27	0.130353	0.228801
LRMP	9.97797e-27	-0.137743	-0.93121
DEGS1	9.97878e-27	0.144272	0.401766
GAMT	1.00409e-26	0.065397	0.730251
PLPP2	1.03221e-26	-0.154601	-0.763571
HSPA5	1.17367e-26	0.138904	0.235617
OGT	1.18343e-26	0.166313	0.35948
CINP	1.19232e-26	0.164937	0.384338
COPS6	1.20547e-26	-0.134683	-0.236945
PRKCQ	1.21256e-26	0.00647266	2.36248
LEPROTL1	1.26954e-26	0.13946	0.336514
RP23-220F20-2	1.31823e-26	0.144823
RBPMS	1.3288e-26	-0.158254	-0.319815
UBQLN2	1.3431e-26	0.14893	0.331106
CBX7	1.46635e-26	-0.143327	-1.04452
PABPC4	1.55864e-26	0.161229	0.37612
PALLD	1.63305e-26	0.24763	0.440025
NET1	1.63815e-26	-0.185848	-0.398855
HP1BP3	1.64281e-26	0.158734	0.441911
PEG12	1.87141e-26	0.0696943	0.185091
EIF3E	1.92266e-26	0.10214	0.186016
IGSF9	1.95691e-26	0.137122	0.50742
CAD	2.11871e-26	-0.13855	-0.266727
TSPAN31	2.151e-26	0.144745	0.315675
CPN1	2.21635e-26	-0.199791	-2.34798
HTRA2	2.37181e-26	0.154509	0.447284
KCNH2	2.43569e-26	-0.151665	-0.861038
FAM216A	2.75446e-26	0.167698	0.410287
TOMM20	2.84752e-26	0.0833448	0.130841
ITGA5	2.96486e-26	0.0582347	0.70017
PMVK	3.03498e-26	0.138869	0.346388
LZTFL1	3.06316e-26	0.155961	0.36793
TAC1	3.3615e-26	-0.184165	-1.92903
PCNP	3.39887e-26	0.134391	0.257309
SQLE	3.40188e-26	0.141102	0.415012
NUDT21	3.73714e-26	0.101739	0.181675
WHSC1	3.86042e-26	0.156086	0.31126
CHCHD4	3.86169e-26	0.164206	0.333816
ATP6V1C2	3.87436e-26	0.00888418	1.91519
TRIM9	4.24395e-26	0.00772488	2.25765
NCKAP5	4.89085e-26	0.0163817	1.54649
FKBP1A	4.8932e-26	0.100471	0.168444
ATP6V1F	5.05255e-26	-0.114805	-0.17549
X5730596B20RIK	5.59327e-26	-0.27659
RALGAPA2	5.92869e-26	0.0961196	0.64207
RABAC1	5.99285e-26	-0.163604	-0.421738
RASL10A	6.03737e-26	0.00371072	2.78673
CYP26C1	6.1689e-26	-0.413345	-4.99809
PWP1	6.23089e-26	0.135235	0.310783
ATR	6.78216e-26	0.158314	0.492729
PCDH9	6.7834e-26	0.0157522	1.58894
MIER1	6.79493e-26	0.144674	0.299627
MARCH5	7.15598e-26	0.122444	0.247596
MAPK8IP2	7.34391e-26	-0.151608	-0.710882
TADA1	7.50409e-26	0.124655	0.442345
HELLS	7.54289e-26	-0.157895	-0.252338
RBM7	7.58324e-26	0.128188	0.298461
NUTF2	7.89815e-26	0.142287	0.499002
DPP3	7.95173e-26	-0.147268	-0.310354
EML1	8.01248e-26	-0.172682	-0.500172
PLXNA2	8.42961e-26	-0.198715	-0.688255
TULP4	8.50833e-26	0.16103	0.44132
ANXA3	9.02683e-26	-0.130686	-1.57333
FHL1	9.20401e-26	-0.181771	-0.386945
APOOL	9.55974e-26	0.149025	0.405341
FGFR2	1.01456e-25	-0.197318	-0.514065
ZIC2	1.11143e-25	-0.183928	-0.436628
CREG1	1.16282e-25	0.139937	0.449833
NPTX1	1.18667e-25	-0.206196	-2.82373
XPOT	1.20006e-25	0.169281	0.431312
FLYWCH2	1.25479e-25	-0.154967	-0.552826
GINS2	1.50914e-25	0.128683	0.246714
PMM1	1.57614e-25	-0.159391	-0.359562
CD164L2	1.62525e-25	-0.250713	-3.58504
ANKRD37	1.82191e-25	0.112474	0.521426
EMD	1.82305e-25	0.123652	0.266604
MOB3C	1.82305e-25	0.0167414	1.56465
GSTP1	1.88685e-25	-0.156931	-0.700975
BCAT2	2.02109e-25	-0.161693	-0.477463
PYM1	2.13509e-25	0.161571	0.445118
MTFR1L	2.16437e-25	0.147744	0.367042
TPI1	2.27302e-25	0.0813678	0.12848
TFAP2B	2.31726e-25	0.0159882	2.10856
MAX	2.58393e-25	0.167186	0.412521
TMC4	2.73296e-25	-0.162548	-0.576849
B3GAT1	2.78807e-25	0.0287406	1.24935
ASB4	2.9229e-25	0.0329154	1.2153
WRB	3.23694e-25	0.169957	0.426461
GM26669	3.78115e-25	0.079503	0.766788
PATJ	4.07757e-25	-0.126207	-1.15236
TOX	4.59264e-25	-0.137926	-1.68125
SLC6A13	4.66251e-25	-0.195298	-3.15394
THBS1	4.8266e-25	-0.220248	-1.13688
HIST1H4D	4.9271e-25	-0.220008	-0.486549
TNNT1	4.97066e-25	-0.153399	-0.881959
RPSA	5.01795e-25	-0.054123	-0.090086
X2410080I02RIK	5.25582e-25	-0.270251
AP1AR	5.63736e-25	0.137375	0.341183
PCNT	5.76036e-25	-0.208364	-0.478562
ASNA1	5.88418e-25	-0.130554	-0.253847
ANXA6	6.59469e-25	-0.125228	-1.06418
D1ERTD622E	7.11119e-25	0.0874463	0.701935
RPL24	7.84147e-25	-0.0495183	-0.0784632
CST3	7.84902e-25	-0.131796	-0.241374
TIMELESS	7.88663e-25	-0.157929	-0.350821
DYNLL2	8.80767e-25	0.140713	0.268784
MSRB1	9.37148e-25	-0.159676	-0.503119
EFEMP2	9.80704e-25	-0.133603	-1.07281
LETMD1	9.98005e-25	0.0672428	0.784259
TSPAN7	1.03307e-24	0.132055	0.41415
TNPO3	1.04867e-24	0.142172	0.314047
TCEB2	1.12146e-24	-0.0782391	-0.120373
TCF15	1.17957e-24	-0.156511	-1.4259
ORMDL1	1.18114e-24	0.13807	0.383441
STXBP6	1.18485e-24	0.120419	0.484612
CUL1	1.36904e-24	0.122759	0.234553
IFI30	1.36904e-24	-0.159409	-0.529038
RBBP4	1.44362e-24	0.104801	0.181121
UQCR11	1.45576e-24	-0.0998109	-0.145317
DPPA5A	1.51095e-24	-0.143657	-2.13124
STARD10	1.51124e-24	-0.148288	-0.683539
KCNB1	1.52414e-24	0.048081	0.950171
TNRC6C	1.59198e-24	-0.140054	-0.244549
UBE2Q2	1.59679e-24	0.131092	0.375149
PSMB5	1.61443e-24	-0.0935892	-0.140616
FDPS	1.65807e-24	0.0564358	0.224531
AP3M2	1.69091e-24	0.0406965	1.01363
SLC25A1	1.72785e-24	0.130225	0.355762
GM45194	1.74422e-24	0.00379583	2.5196
SNRNP40	1.79501e-24	0.110483	0.216399
POLR2D	1.82632e-24	0.120846	0.228003
KLHL9	1.84348e-24	0.158086	0.397764
CBFA2T3	2.0873e-24	-0.112467	-1.46143
CDON	2.2057e-24	0.0662812	0.527753
ILF2	2.22219e-24	0.105796	0.19244
ARID3C	2.23451e-24	-0.172138	-2.52831
KIF5A	2.5436e-24	-0.137785	-0.858723
CNOT7	2.55644e-24	0.149699	0.318008
RPS3	2.55644e-24	-0.054082	-0.078339
SPEG	2.63911e-24	-0.160085	-0.581438
CSDE1	2.80351e-24	0.132586	0.25143
NDUFS6	2.80999e-24	-0.102748	-0.151201
MUP6	2.86938e-24	-0.374618	-4.71188
LSM6	3.07735e-24	0.0939474	0.158636
SLC25A33	3.77797e-24	0.136518	0.491972
MINPP1	3.92054e-24	0.173388	0.376823
VPS26A	3.92054e-24	0.142866	0.453601
NUP37	4.05318e-24	0.14723	0.328147
IFRD1	4.14869e-24	0.166936	0.37061
RPS28	4.17143e-24	-0.0882283	-0.135646
MME	4.21336e-24	-0.153958	-2.38615
ISM2	4.33341e-24	0.00353532	2.74292
COPS2	4.51242e-24	0.133425	0.283471
GNG13	4.51641e-24	-0.135817	-1.74132
DPYSL2	4.69649e-24	0.189683	0.436605
RASSF2	5.03701e-24	0.0740148	0.748444
X1110008P14RIK	5.18844e-24	-0.153323
DPY19L3	5.20745e-24	0.0700049	0.620725
GM30731	5.26794e-24	0.00365046	2.66903
HOXA5	5.26794e-24		-24.5622
NOA1	5.75946e-24	0.153195	0.425554
X1110004E09RIK	6.19773e-24	0.136601
PTMA	6.68306e-24	-0.0501499	-0.0726451
TEX30	6.71887e-24	0.115838	0.307488
VSTM2L	7.08406e-24	-0.137307	-1.98885
FAM81A	7.62842e-24	-0.142546	-1.86619
EBF3	8.09338e-24	0.0114016	2.01754
PDIA4	8.49478e-24	0.151878	0.315182
EDARADD	8.98386e-24	0.0433354	1.07231
SP7	9.34037e-24	0.015508	1.5971
DDX5	1.00747e-23	0.101607	0.18321
PLCL2	1.04803e-23	0.0553534	0.810189
SYT3	1.13747e-23	-0.115988	-1.33378
EIF1AD	1.21652e-23	0.128535	0.271646
LSM8	1.33675e-23	0.12031	0.216728
BAIAP2L1	1.34306e-23	-0.156675	-0.555154
UHRF1	1.41973e-23	0.146933	0.294298
SOCS4	1.4271e-23	0.120032	0.510114
GADD45A	1.42913e-23	-0.142648	-0.55484
ROR1	1.43116e-23	-0.143386	-0.861445
MOB4	1.52728e-23	0.120369	0.253805
TIPIN	1.545e-23	0.127347	0.235523
DLK1	1.60887e-23	-0.179165	-0.811085
BCL11A	1.87903e-23	-0.123046	-1.8772
SDCCAG3	1.88646e-23	0.154667	0.432504
EXOC3	1.92432e-23	0.12537	0.310095
RRS1	1.92907e-23	0.123021	0.244456
DGKA	2.1688e-23	-0.129523	-1.99908
KPNA4	2.26568e-23	0.132648	0.283366
ODF2	2.27276e-23	0.161399	0.378167
TRIQK	2.28485e-23	0.046666	0.853436
NUDT5	2.32825e-23	0.1067	0.194764
CNPY2	2.33894e-23	-0.118661	-0.210533
NADK	2.44139e-23	0.118161	0.317579
NDUFA7	2.7527e-23	-0.0912323	-0.144881
DESI2	2.98157e-23	0.131216	0.313115
PRDM5	3.00758e-23	0.116906	0.491971
PTPN6	3.12486e-23	-0.132599	-0.798999
FOXN3	3.25371e-23	0.140477	0.467592
EXOC6	3.57136e-23	-0.14056	-1.1337
X1110008F13RIK	3.71729e-23	0.0977737
MAPK6	3.74008e-23	0.13636	0.344066
DNAJC9	3.76815e-23	0.113049	0.211185
PRUNE2	3.78506e-23	-0.111282	-1.49203
KHK	3.78506e-23	-0.131858	-0.709133
RP9	3.98376e-23	-0.15447	-0.385266
SRSF5	4.08312e-23	0.124402	0.217981
MMS22L	4.1108e-23	0.134934	0.396494
ACADL	4.39594e-23	-0.159134	-0.553234
VDAC3	4.66172e-23	0.110577	0.21124
CLDN19	4.66714e-23	0.00251767	3.00105
SEPT9	4.69499e-23	0.13929	0.368534
PSMA3	4.9837e-23	0.0844405	0.139081
F2R	5.56541e-23	0.156077	0.450405
CYB5R1	6.14932e-23	-0.149985	-0.531308
DCC	6.29463e-23	0.021288	1.37649
X2700033N17RIK	6.31216e-23	-0.136484
MAK16	6.68924e-23	0.131356	0.265536
UBR5	6.77479e-23	-0.129114	-0.262781
HBB-Y	6.86562e-23	0.0196645	1.31847
NIPSNAP3B	6.89356e-23	0.132314	0.343134
PKIA	7.00435e-23	0.0960197	0.622046
MAP2K6	7.17124e-23	-0.153556	-0.336956
GATA6	7.59333e-23	-0.199305	-3.3444
FSCN1	7.72655e-23	0.110075	0.194003
NT5DC2	7.87032e-23	-0.105956	-0.134728
TMEM37	8.05135e-23	-0.139347	-1.02052
PCNA	8.2649e-23	0.140642	0.285686
LNPK1	8.36841e-23	0.142039	0.450488
ABCB8	8.80029e-23	-0.131363	-0.612492
REEP5	8.88136e-23	-0.152663	-0.393415
YWHAB	8.94744e-23	0.0968029	0.169584
EXOSC8	8.99246e-23	0.106201	0.176232
SARNP	9.08717e-23	0.122692	0.236391
ZBTB38	9.21142e-23	-0.12561	-0.928679
SLC13A4	9.2527e-23	-0.124829	-1.09059
AGO1	1.03111e-22	0.136978	0.482879
GNA11	1.07856e-22	0.121436	0.265025
PPP2R3A	1.0955e-22	0.106256	0.517003
GAPDH	1.13323e-22	-0.0797513	-0.114502
ENPP3	1.23037e-22	0.0300867	1.07689
DTD2	1.23437e-22	0.128541	0.428785
TNK1	1.32238e-22	-0.146298	-2.80166
ATXN2L	1.35026e-22	0.147523	0.347427
PLEKHB1	1.39333e-22	0.0110916	1.80267
FOXB1	1.47345e-22	0.135554	0.174918
HERC1	1.48145e-22	0.144842	0.414226
IFITM1	1.50703e-22	-0.141268	-0.291343
LARS2	1.54202e-22	-0.164187	-0.585576
MAT2A	1.66753e-22	0.114159	0.202434
RGS10	1.69079e-22	-0.144328	-0.592762
NCBP1	1.70146e-22	0.125626	0.280334
MRPS10	1.74532e-22	0.118589	0.256215
CRABP1	1.86386e-22	0.224344	0.136542
CRLS1	1.87616e-22	0.133098	0.355529
MPC2	1.96011e-22	0.132255	0.400749
CALM1	2.01244e-22	0.084223	0.124587
ARPC2	2.02349e-22	0.0970669	0.180269
RASGRP3	2.04216e-22	-0.278196	-3.90232
RSPH1	2.06949e-22	-0.123556	-0.845073
HACD3	2.26188e-22	0.128526	0.474113
X9130401M01RIK	2.35763e-22	0.112875
HNRNPAB	2.35763e-22	0.0768953	0.128355
PODXL2	2.49502e-22	0.0694494	0.743007
SEC62	2.50737e-22	-0.11609	-0.194627
DAAM1	2.59661e-22	0.127127	0.511618
FXYD6	2.82272e-22	-0.141925	-0.297615
SPRY2	2.91763e-22	0.15245	0.48803
PTGES3	3.03418e-22	0.090489	0.146061
ANXA7	3.07086e-22	-0.137948	-0.641798
TIMM10	3.0897e-22	0.129804	0.280216
ZC3H14	3.13478e-22	0.118601	0.265998
UBE2E1	3.16164e-22	0.127567	0.273158
RPS15A	3.29051e-22	-0.049115	-0.0671084
IFT52	3.2981e-22	0.131097	0.436527
ATG3	3.64692e-22	0.13433	0.375038
FBXO2	3.70404e-22	-0.115091	-1.29277
SGK1	3.77058e-22	-0.125263	-1.39069
X1810022K09RIK	3.87269e-22	-0.13001
RNF5	3.95945e-22	0.172476	0.369844
X2310036O22RIK	3.98696e-22	0.103535
TMSB10	4.052e-22	-0.0917747	-0.145743
ATP5SL	4.052e-22	-0.149458	-0.46732
MAPRE1	4.07074e-22	0.103239	0.204233
PLCE1	4.19246e-22	-0.143603	-0.580638
STAT6	4.37824e-22	-0.114557	-1.01836
SNN	4.63178e-22	0.143766	0.44054
USP46	4.64531e-22	0.148686	0.437508
X1700123O20RIK	4.74713e-22	0.126388
RGS16	4.83846e-22	0.0210023	1.15987
DDIT4L	4.91378e-22	-0.135723	-0.84241
VDAC1	5.52445e-22	0.0962994	0.170182
GJB3	5.65258e-22	-0.156296	-1.81916
NIFK	5.6731e-22	0.121448	0.26702
MRFAP1	5.95147e-22	0.081233	0.137143
PLPP3	6.38921e-22	0.142294	0.517406
GXYLT2	6.53291e-22	0.0136603	1.62176
SLC29A1	6.56649e-22	0.114919	0.608391
SLK	6.90074e-22	0.153532	0.415934
A730017C20RIK	7.76822e-22	0.0696205	0.831863
GNA14	7.99843e-22	-0.134368	-1.42394
SIGMAR1	8.21406e-22	0.137036	0.280415
MT-ND5	8.29405e-22	-0.123164	-0.198861
PSMA5	9.07681e-22	0.0997556	0.190949
TMEM33	9.35018e-22	0.123823	0.297936
RPS16	9.37742e-22	-0.0480556	-0.0800291
GMFB	1.01758e-21	0.145181	0.367715
CISD2	1.04593e-21	0.1154	0.213312
GM12166	1.09532e-21	0.101309	0.564722
JAKMIP2	1.22952e-21	0.114019	0.551969
GLUD1	1.23343e-21	0.130099	0.319372
ATP5J2	1.25193e-21	-0.0812381	-0.123111
GTPBP4	1.31107e-21	0.105908	0.210925
EEF1A1	1.36118e-21	-0.0849795	-0.0991924
CCDC160	1.40869e-21	0.102219	0.557045
CTNND2	1.49842e-21	0.0490393	0.782889
VAX1	1.52778e-21	-0.396161	-5.1527
PPP1R14A	1.54002e-21	-0.128379	-0.90616
CRK	1.55581e-21	0.138766	0.353794
R3HDM1	1.56218e-21	0.15832	0.326374
CNIH4	1.58242e-21	0.117318	0.21818
X1700011H14RIK	1.59465e-21	-0.673071
SNAI1	1.5973e-21	-0.0603503	-0.854922
SCRN1	1.61516e-21	0.0564959	0.625255
SLC6A11	1.62781e-21	0.00813983	1.97209
BZW1	1.65131e-21	0.0932353	0.165903
ARHGAP1	1.66954e-21	0.0934582	0.443831
RAPGEF5	1.86821e-21	-0.120095	-0.906894
DEK	1.94987e-21	-0.0781444	-0.115281
LDLR	1.98108e-21	0.0736848	0.656205
PPP1R9A	2.01213e-21	0.171377	0.479879
SENP7	2.36212e-21	0.129247	0.501152
URM1	2.41225e-21	0.132202	0.414123
CCND3	2.61582e-21	0.128325	0.281979
ENSA	2.65104e-21	0.135233	0.344768
NF1	2.90753e-21	0.125878	0.500212
MTPN	2.94677e-21	0.134091	0.276591
CLASP1	3.0615e-21	0.129282	0.369536
SMIM14	3.14046e-21	-0.155987	-0.422919
FAM178B	3.17751e-21	-0.123725	-0.849247
SYP	3.54402e-21	0.0244265	1.14308
FAM195A	3.57892e-21	0.109465	0.52683
NSF	3.85402e-21	0.129161	0.390893
EFCAB14	4.86304e-21	0.120448	0.345734
X2700038G22RIK	4.88445e-21	0.140473
NAA40	4.95177e-21	0.125062	0.377078
GM13889	5.18198e-21	-0.128434	-1.55985
GTF2IRD1	5.45752e-21	0.143986	0.388818
FGFBP1	5.66828e-21	-0.319932	-5.14843
CROCC	5.71236e-21	0.100407	0.531065
TMEM108	5.88981e-21	-0.172081	-0.491887
ANKRA2	6.04597e-21	-0.142883	-0.438279
EFHD1	6.18281e-21	-0.123902	-2.09283
GNB1	6.21296e-21	0.100089	0.184031
PDE4B	6.29478e-21	0.0285032	1.12446
CTPS2	6.9738e-21	-0.122093	-0.626022
NASP	7.4863e-21	-0.0888488	-0.106713
ISG20L2	7.56023e-21	0.141375	0.383178
AKIRIN2	7.71592e-21	0.112745	0.252586
MARK3	7.83325e-21	0.124206	0.308145
RPL12	7.91103e-21	-0.0495829	-0.0623237
JMY	8.96959e-21	0.112923	0.537821
POLR2I	9.38334e-21	-0.108948	-0.177313
SMC6	9.43185e-21	0.115473	0.221008
FKBP3	1.00628e-20	-0.0639596	-0.093694
RPS27L	1.01366e-20	0.0809359	0.121506
NAA20	1.01801e-20	0.142401	0.29706
GM26778	1.02013e-20	0.00400821	2.48241
DCP2	1.04096e-20	0.118285	0.288631
HHIP	1.12255e-20	-0.169207	-3.12461
DPYSL5	1.18949e-20	0.155279	0.450662
EIF4E2	1.21894e-20	0.100384	0.180699
SH3D19	1.29738e-20	-0.121901	-0.544036
CDC42SE2	1.37891e-20	0.111965	0.296982
OLFM1	1.45943e-20	0.134456	0.415033
RPL26	1.46501e-20	-0.0440309	-0.0582851
ACP5	1.47334e-20	-0.117489	-1.80492
TIMM10B	1.52968e-20	0.103453	0.286906
INSM1	1.58089e-20	0.0211511	1.19825
RHPN1	1.66146e-20	0.0554131	0.763725
RCBTB1	1.67117e-20	0.128094	0.382727
TIMMDC1	1.71368e-20	0.102222	0.447944
RPLP2	1.79187e-20	-0.0500653	-0.0693096
SNX15	1.9286e-20	-0.127158	-0.615522
GOLM1	1.9343e-20	0.13362	0.270978
ANXA2	2.04191e-20	-0.117067	-0.925606
GAR1	2.0683e-20	0.107747	0.221949
B3GNT5	2.3112e-20	0.10544	0.554603
RASL10B	2.42452e-20	-0.108445	-0.908261
TCEAL3	2.43462e-20	0.056511	0.794361
NDUFA13	2.44453e-20	-0.0963031	-0.150975
PTS	2.61044e-20	0.147006	0.386898
SGK3	2.67391e-20	-0.123209	-2.03979
ORAI1	2.68027e-20	0.0808342	0.423334
CD47	2.8648e-20	0.154562	0.376304
KCTD6	2.98913e-20	0.0717578	0.626354
COPZ2	3.01439e-20	0.0779343	0.647739
X1500009L16RIK	3.01907e-20	-0.135686
X6430628N08RIK	3.10119e-20	0.00427532
PID1	3.12639e-20	-0.128265	-1.08615
LSM7	3.33162e-20	-0.132194	-0.265163
FAM173A	3.36925e-20	-0.14127	-0.352905
PABPC1	3.43499e-20	0.0935474	0.165078
FAM169B	3.46535e-20	-0.206594	-3.46267
BUB1	3.52856e-20	0.131454	0.296302
KDM5B	3.6098e-20	-0.123655	-0.183422
GTF2E2	3.77559e-20	0.11745	0.24119
HSDL1	3.83374e-20	0.0790918	0.598756
LPAR1	3.84023e-20	-0.163563	-0.501157
BCKDHA	4.03576e-20	-0.142383	-0.430265
SMAD7	4.06276e-20	0.0496441	0.836257
AGR2	4.07328e-20	0.00145039	3.48737
ACTR10	4.17804e-20	0.130043	0.307682
BTRC	4.17926e-20	-0.137979	-0.52308
BANF1	4.30785e-20	0.0881203	0.160561
SLC35C2	4.31433e-20	0.117137	0.418637
CDC42SE1	4.4521e-20	0.122277	0.387988
XIST	4.83596e-20	-0.136544	-0.543138
PCDH7	5.24367e-20	0.0241733	1.16822
GRIK3	5.28199e-20	-0.110144	-1.01638
JADE2	5.76121e-20	-0.0962872	-1.48895
MT-ATP8	5.83346e-20	-0.13497	-0.280525
ZFP219	6.10502e-20	0.124092	0.33041
GOLPH3	6.10502e-20	0.114868	0.378765
ATP5F1	6.507e-20	0.0735662	0.1198
ZFP280C	6.53881e-20	0.150873	0.413433
MRPL41	6.80278e-20	0.121595	0.261612
RHOF	6.80278e-20	-0.11005	-1.78437
GPX1	6.81802e-20	-0.0966731	-0.149993
SOX9	6.90453e-20	-0.203789	-0.539324
RPL11	6.95799e-20	-0.0529954	-0.0821477
ZMYM5	7.04027e-20	0.131668	0.384053
MOBP	7.0531e-20	-0.254058	-4.2203
LETM1	7.19666e-20	-0.14078	-0.313553
SRM	7.33097e-20	0.127486	0.23767
X2700081O15RIK	7.48014e-20	0.123352
FAM96A	8.00623e-20	0.12446	0.263177
RPL29	8.05886e-20	-0.122602	-0.205277
SAPCD2	8.18961e-20	0.110704	0.489456
PYGO1	8.2205e-20	0.0570854	0.781677
HIVEP2	8.36952e-20	-0.123349	-1.8274
GRB14	8.48661e-20	-0.114617	-1.33547
ADPRH	8.57402e-20	0.152679	0.352492
SPATS2	8.79001e-20	0.126638	0.288315
GM9938	8.86864e-20	0.0282933	1.0912
ALG2	8.92933e-20	0.0895268	0.500213
CLDN5	8.99379e-20	-0.177143	-2.71076
BLVRB	9.00983e-20	-0.126015	-0.649506
PDE1A	9.15972e-20	-0.323466	-4.77787
OAF	9.34099e-20	-0.131581	-0.590958
FKTN	9.55424e-20	0.0998206	0.525328
KANSL2	9.56913e-20	0.127732	0.32137
CXX1B	9.92018e-20	-0.156884	-0.458802
CDK1	9.92905e-20	0.153656	0.326369
SLIT3	1.04009e-19	-0.140982	-0.867908
MED8	1.04168e-19	0.099483	0.19264
EIF4G2	1.07935e-19	0.0960638	0.148456
AMFR	1.12691e-19	0.120815	0.465354
TUBA1A	1.15314e-19	0.129692	0.212164
OSMR	1.20568e-19	0.00374753	2.59646
MYH14	1.23429e-19	-0.0985894	-1.2002
DGCR6	1.30744e-19	0.111663	0.220636
XKR4	1.32213e-19	-0.142872	-2.69746
SH3PXD2A	1.38594e-19	0.0489026	0.803621
MPPED2	1.40108e-19	-0.142201	-0.486006
SRSF7	1.42025e-19	0.0870966	0.152183
PEX5L	1.43626e-19	-0.123649	-0.96921
SYNCRIP	1.45295e-19	0.11485	0.23716
MICAL1	1.48685e-19	-0.127736	-0.600288
SPRED3	1.61949e-19	0.0739293	0.710857
WNT8B	1.86384e-19	-0.0227568	-0.500138
KCNK1	1.88075e-19	-0.135179	-0.503344
ARHGEF9	1.93341e-19	0.0489818	0.820054
TAF2	1.98998e-19	0.122753	0.391072
SSSCA1	2.07269e-19	-0.12658	-0.215057
NTNG1	2.08231e-19	-0.147602	-1.58312
CLDN3	2.09665e-19	-0.121469	-1.87634
HIPK2	2.12871e-19	0.147637	0.380719
MPV17L2	2.25279e-19	-0.127057	-0.553242
RASIP1	2.30734e-19	-0.100869	-1.04057
SPAG9	2.32024e-19	0.163979	0.382775
NME2	2.38444e-19	0.0921179	0.509923
PCNX2	2.45168e-19	-0.198287	-4.75009
RPL13-PS3	2.52695e-19	0.106197	0.207246
MET	2.60593e-19	-0.105879	-1.415
TMEM82	2.65643e-19	-0.10763	-1.17813
CDR2	2.77069e-19	0.0871932	0.468176
ATF4	2.7815e-19	0.11728	0.264897
DCK	2.80318e-19	0.138598	0.386638
RIPK4	3.01998e-19	-0.103193	-1.17426
HEBP2	3.04422e-19	-0.121018	-0.714185
GSTT3	3.61797e-19	-0.088587	-1.55883
DMD	3.68515e-19	-0.118909	-0.873891
RPS6KA4	3.69479e-19	-0.108471	-1.77157
GM42418	3.82552e-19	-0.346552	-0.609638
MRPS6	3.90024e-19	0.152232	0.322313
SPCS3	4.05517e-19	0.12241	0.40589
CASP8AP2	4.29929e-19	0.13327	0.26108
NPBWR1	4.43834e-19	0.00288329	2.70596
HMGCR	4.44591e-19	0.0962338	0.270532
LGALSL	4.55066e-19	0.0654616	0.572578
NKX2-1	4.96957e-19	-0.403822	-3.42426
ZMAT4	5.43496e-19	-0.101794	-1.24097
PSMA1	5.52775e-19	0.0905746	0.15133
BTBD2	5.58417e-19	-0.131098	-0.270855
NCS1	5.78735e-19	0.0871293	0.464023
GSTK1	5.87118e-19	-0.104338	-1.04495
HSD17B7	5.93106e-19	0.0716664	0.589643
TBRG1	6.13176e-19	0.0988077	0.18643
CCDC85A	6.20905e-19	-0.153845	-2.66526
MFSD14A	6.24847e-19	0.139208	0.393004
UBN2	6.3419e-19	0.123014	0.278926
VIM	6.64621e-19	0.161814	0.422772
ACADM	6.76998e-19	-0.137826	-0.321499
MRPL32	7.03857e-19	0.0974288	0.208524
AKT2	7.39235e-19	0.0966187	0.427413
CPNE4	7.6287e-19	-0.079745	-1.3492
CHD9	7.67431e-19	0.131795	0.472131
CLPTM1L	7.74899e-19	0.123822	0.395881
PLEKHJ1	8.05591e-19	0.0990548	0.183373
GPX7	8.34399e-19	-0.136751	-0.469307
PEX13	8.58439e-19	0.139477	0.372035
RNF2	8.98558e-19	0.141403	0.346117
TFDP1	9.09788e-19	0.122581	0.257704
CDC7	9.32235e-19	0.131869	0.394901
ATP2A2	9.4541e-19	0.130065	0.267614
LAP3	9.57266e-19	0.103475	0.209112
SHROOM2	9.71706e-19	-0.106418	-0.788971
RPS23	9.85879e-19	-0.0418466	-0.0497334
SNAPC5	9.89675e-19	-0.119097	-0.270815
ARCN1	1.02994e-18	0.139963	0.336182
PTPRA	1.07387e-18	0.126954	0.360947
FAM187B	1.08609e-18	-0.0891047	-0.915481
SCUBE3	1.14422e-18	0.0287871	1.03974
PITPNB	1.19343e-18	0.113085	0.262742
LRRN1	1.24774e-18	-0.121634	-0.585248
MT-ND4	1.26008e-18	-0.112767	-0.192857
RBM15	1.26167e-18	0.139082	0.392072
MPHOSPH6	1.28853e-18	0.11417	0.265596
X1700023F06RIK	1.30472e-18	-0.104666
TNS3	1.3142e-18	-0.134164	-0.593488
APITD1	1.31947e-18	-0.110354	-0.276131
LPL	1.32643e-18	-0.142628	-0.425668
COL9A3	1.38688e-18	-0.107281	-0.950019
MOB1A	1.3905e-18	0.122029	0.426374
AGPAT5	1.39078e-18	0.132045	0.296144
PLXNA1	1.52162e-18	0.0698516	0.402257
EFCAB1	1.57115e-18	0.0453387	0.809677
HSF2	1.57888e-18	0.131836	0.368642
NPAS1	1.61994e-18	-0.189503	-3.07108
PTP4A3	1.73019e-18	0.0882012	0.506047
RB1	1.76629e-18	0.0731086	0.608923
UBE2QL1	1.77286e-18	0.03474	0.911666
RAD18	1.77956e-18	0.117293	0.359947
KCNK2	1.87092e-18	-0.105792	-1.1518
GM561	1.89969e-18	0.108424	0.373464
PRKAR2A	1.91357e-18	0.100993	0.446234
ARHGAP18	1.93477e-18	0.022302	1.13367
KRTCAP2	1.93477e-18	-0.0913449	-0.143181
MT-CO2	1.9369e-18	-0.0959361	-0.156846
ATP5C1	2.22908e-18	-0.0899748	-0.135384
ESD	2.28296e-18	0.0893877	0.149426
SLC8A3	2.29995e-18	0.025156	1.07015
SH3BGRL	2.31582e-18	0.118581	0.231863
GSK3B	2.4567e-18	0.11684	0.23087
ATPAF1	2.46085e-18	0.0987679	0.33412
OXSR1	2.62755e-18	0.121634	0.417003
CDH4	2.75361e-18	0.0779592	0.582091
TIAL1	2.87303e-18	0.105954	0.245947
ITPR3	2.87303e-18	-0.0955813	-1.54912
DARS	3.18544e-18	0.117996	0.278091
NNAT	3.25126e-18	-0.16522	-0.293232
TMPO	3.31354e-18	0.0955183	0.181601
APPBP2	3.49081e-18	0.108409	0.27438
PATL1	3.53062e-18	0.0937342	0.495242
CTBP1	3.62825e-18	0.105757	0.223108
ALKBH5	3.70918e-18	0.127426	0.313519
SLC30A9	3.77084e-18	0.113934	0.295467
IARS	3.90721e-18	0.133177	0.334061
INTS6L	4.07083e-18	0.0662028	0.64917
USE1	4.08696e-18	-0.122396	-0.23882
TES	4.11529e-18	-0.125963	-0.586718
MFAP4	4.15906e-18	-0.106881	-0.802019
IGF2	4.3096e-18	-0.114864	-0.702179
HIST1H3E	4.38659e-18	-0.149295	-0.443749
AZI2	4.38756e-18	0.111792	0.399131
PORCN	4.59017e-18	-0.119611	-0.841044
TOMM22	4.70691e-18	0.094124	0.178689
TMEM17	4.75454e-18	0.0552654	0.635033
NCBP2	4.79567e-18	0.104269	0.208557
NSG2	4.85542e-18	0.0706267	0.338214
DDX20	4.95009e-18	0.118089	0.402704
BMPER	4.96561e-18	0.0177089	1.28021
DR1	4.98925e-18	0.119772	0.346128
AP3M1	4.98925e-18	0.11387	0.384449
VTA1	5.48854e-18	0.113205	0.290079
RRAGA	5.52718e-18	0.110448	0.238416
SSB	5.6232e-18	0.0769539	0.139237
HNRNPL	5.74912e-18	0.111641	0.21441
DDX39	5.91846e-18	0.0973098	0.179639
SUB1	5.91846e-18	0.0674223	0.117324
PDZD4	5.97969e-18	-0.14373	-0.408107
ECHS1	6.02475e-18	-0.112006	-0.200634
SV2A	6.21885e-18	-0.0989254	-1.17796
WNK3	6.3417e-18	0.122721	0.407572
TDRKH	6.49518e-18	0.104276	0.544484
SLC24A5	6.50592e-18	0.136999	0.259851
GLRA1	6.72391e-18	-0.198696	-3.29289
MYO6	6.92158e-18	0.0406697	0.869737
SLC16A11	8.0171e-18	-0.146039	-3.16317
RIMBP2	8.46576e-18	-0.0961156	-1.56794
CALN1	8.81823e-18	-0.114047	-0.734619
JUNB	9.01027e-18	0.0367145	0.871813
PPP2CB	9.64899e-18	0.127685	0.366283
HCCS	9.73655e-18	0.104824	0.454485
SAMD14	9.81006e-18	0.0776879	0.587299
CUL3	1.00232e-17	0.102889	0.204851
NFATC4	1.01873e-17	-0.108718	-0.699831
CCDC6	1.03458e-17	0.106512	0.393428
GM11587	1.12819e-17	0.00265364	2.77486
TMEM251	1.15632e-17	0.128104	0.390361
SNTB2	1.19782e-17	0.100953	0.478727
UGP2	1.19976e-17	0.0946863	0.434881
PREB	1.22238e-17	-0.134033	-0.307065
PDZD2	1.22372e-17	0.0599888	0.797716
ADK	1.22717e-17	0.124165	0.282561
X2200002D01RIK	1.26763e-17	-0.111238
SOS1	1.28855e-17	0.106197	0.483963
RIPPLY3	1.31494e-17	0.0172314	1.40157
ZFP113	1.34263e-17	0.0996136	0.449067
YPEL3	1.40013e-17	-0.132528	-0.526003
KNL1	1.46236e-17	0.139254	0.370056
GLRX5	1.4678e-17	0.0921153	0.176365
SLC25A39	1.48019e-17	-0.112149	-0.202691
PPIB	1.51894e-17	0.0860627	0.127608
SMARCA1	1.52818e-17	-0.144197	-0.367294
APRT	1.54267e-17	0.0873408	0.140184
WSCD2	1.62077e-17	0.0132453	1.44821
SLC45A2	1.62577e-17	0.00107389	3.63458
NKX6-1	1.67595e-17	0.0830744	0.406436
KTN1	1.75961e-17	0.102155	0.157073
RAB11FIP1	1.88922e-17	0.0899402	0.422942
HAGLR	1.88994e-17	-0.12798	-2.52008
KMT2E	1.90346e-17	0.135309	0.342713
AP1S3	2.01966e-17	-0.102878	-0.908585
KRR1	2.06546e-17	0.121137	0.289278
GMPS	2.06959e-17	0.0957776	0.167936
CEP170	2.09726e-17	0.12188	0.41391
AHCYL1	2.09848e-17	0.114005	0.293724
CAMK1	2.17169e-17	0.0762304	0.476218
PRKAB2	2.20217e-17	0.0598718	0.575618
GPR153	2.21073e-17	0.0551061	0.729188
FAM220A	2.27694e-17	0.110456	0.262853
ACACA	2.34131e-17	0.129157	0.403337
PPFIA1	2.34708e-17	0.127672	0.324863
RIIAD1	2.38974e-17	-0.0960089	-1.7057
NAPSA	2.40278e-17	-0.119041	-1.58679
EZR	2.41468e-17	-0.142866	-0.259031
BIRC5	2.4925e-17	0.0973844	0.188723
GBX1	2.50356e-17	-0.238226	-3.83334
FMO1	2.555e-17	0.00877711	1.84685
UBE2F	2.58336e-17	0.110462	0.257418
ARL6	2.6091e-17	0.109281	0.293548
HNRNPLL	2.63104e-17	0.115593	0.274682
RIOK3	2.63917e-17	0.106664	0.352181
SKA2	2.64261e-17	0.113264	0.342532
FAM122A	2.65577e-17	0.0766319	0.294126
CHMP4C	2.83127e-17	-0.0951696	-1.49036
IMPDH1	2.96003e-17	-0.134605	-0.363024
RNF220	3.04021e-17	0.12981	0.314106
TANC1	3.09198e-17	-0.110697	-0.614906
RING1	3.46766e-17	0.100414	0.481166
LMO7	3.63263e-17	-0.0954041	-0.997012
RGS2	3.63487e-17	0.0741575	0.682795
HN1	3.6578e-17	0.110654	0.21051
GM10273	3.71288e-17	0.0571539	0.676134
TMEM199	3.99397e-17	0.106853	0.300747
SDHD	4.1228e-17	0.113125	0.247471
RGL2	4.44703e-17	-0.101968	-0.471264
IST1	4.47635e-17	0.108711	0.452215
TECR	4.65543e-17	-0.0904004	-0.152578
ALKBH7	4.66459e-17	-0.132265	-0.452042
KIF1B	4.8908e-17	0.142704	0.32344
PLOD2	5.00648e-17	0.132253	0.33792
TMEM256	5.0202e-17	-0.111593	-0.219849
EEF1D	5.05451e-17	0.071007	0.116973
BCL2L11	5.10032e-17	0.146066	0.407564
NUDT9	5.47664e-17	-0.13171	-0.334638
IGFBP3	5.68278e-17	0.058443	0.688161
[truncated: 7,631 more rows]

## Sheet: PhenoGraph cluster 5
gene	P-value (FDR adjusted)	MAST Hurdle	logFC
OTX2	0	1.08289	2.26318
PAX6	0	0.618348	3.31774
SLC25A4	0	0.605717	0.945592
LIX1	0	0.590894	2.12295
EPHA7	0	0.488337	2.37
EHBP1	0	0.398762	2.11612
OTX1	0	0.318272	2.99946
CNTNAP2	0	0.258986	2.84074
SCUBE2	0	0.179212	2.46633
EMX2	0	0.104028	4.24161
DMRTA2	0	0.0708796	3.3431
EDARADD	0	0.0551274	3.32953
ARX	0	0.0475105	4.17171
DMRT3	0	0.0472588	3.87911
WNT8B	0	0.0377521	5.96375
WNT7B	0	0.0301946	4.01951
BARHL2	0	0.0139006	5.94261
RBP1	0	-0.869377	-2.24238
TAL2	1.28569e-300	0.334617	2.3093
NR2F2	8.68266e-294	0.562351	2.22697
NR2E1	7.08713e-277	0.0218281	4.12656
POU5F1	9.2272e-275	-1.68982	-4.23743
IRX3	1.06691e-272	-0.939624	-2.76848
SIX3	2.33094e-239	0.576331	0.914218
LHX5	8.45288e-239	0.382433	2.03695
EZR	3.18959e-234	-0.742735	-1.73529
GLI3	2.98667e-231	0.61811	1.27026
IGFBP2	3.68968e-226	0.83046	1.2181
RFLNB	2.66696e-223	0.310447	1.66777
X2510009E07RIK	1.34086e-222	0.173495
MECOM	1.83607e-218	0.107928	2.38925
PDZPH1	1.79729e-215	0.27718	1.74432
FILIP1	3.32996e-215	0.0231989	3.68769
NAV1	1.60753e-211	0.579168	1.31089
ZFHX4	2.14618e-210	0.266009	1.85097
AES	5.09817e-210	-0.654907	-1.66588
CLU	1.64897e-209	0.177126	1.92458
KHDRBS3	1.93659e-209	0.519597	0.934127
X3632451O06RIK	2.54709e-209	0.308779
STK26	1.32438e-201	0.120734	1.9414
DKK1	7.47686e-200	0.238485	2.50404
FGFR1	2.28691e-194	-0.509329	-1.11302
IRX5	1.29124e-191	-0.749251	-2.25191
TPBG	2.33685e-188	0.456977	1.30797
ZFP503	1.3775e-183	0.587211	1.60121
CFAP77	3.02485e-183	0.0485238	2.74996
EDN1	1.74869e-180	0.0906068	2.43892
GBX2	5.23821e-180	-1.09219	-4.09655
CD24A	2.04258e-179	-0.469577	-0.948691
SRCIN1	2.64839e-178	0.143272	1.91977
GM28050	3.06568e-177	0.0405775	2.75119
PHLDA1	4.72835e-174	0.543565	1.55942
PALLD	3.44372e-173	0.61505	1.22777
ID3	4.8782e-173	0.805056	1.16565
IRS4	2.00163e-171	0.507124	1.6794
EPB41	2.04239e-164	0.43655	0.826689
CHCHD10	8.00871e-158	-0.849634	-2.4558
EPCAM	8.88796e-158	-1.10093	-2.84159
DMRTA1	9.90471e-155	0.0269773	3.09586
SCD1	3.94219e-154	0.215792	1.49577
FZD4	1.14399e-152	0.08836	2.19759
GM1673	6.71626e-151	0.522593	0.801974
STOX2	1.65718e-145	0.518008	0.998737
FST	1.75241e-145	-1.1424	-2.33557
GSC2	7.26367e-145	0.026555	3.13968
SEMA3A	1.57379e-144	0.0735991	2.32253
MEIS2	3.85067e-143	-0.688867	-1.41023
GLRX	5.34641e-143	0.265775	1.27793
UPP1	2.00714e-142	-0.977543	-3.16286
RNF152	1.31086e-141	0.0782795	2.20955
WNT5A	1.82298e-141	0.172576	1.61197
CDH1	2.06015e-141	-0.852471	-4.15183
IGFBP3	4.46409e-141	0.112531	1.9045
LRRTM3	5.06493e-141	0.0931515	2.1014
RBPMS2	2.01811e-140	-0.483646	-1.47994
ZIC3	1.04758e-139	-0.616615	-1.8515
BARHL1	4.72925e-138	0.0187258	3.60078
CDH2	2.7877e-137	0.749868	1.04128
AUTS2	2.9435e-137	-0.408659	-0.975852
GUCY1A3	8.17906e-136	0.0253352	2.88436
HMGN5	3.42253e-135	-0.37944	-0.800163
ATPIF1	1.42288e-134	-0.266055	-0.437451
L1TD1	1.44942e-134	-0.999374	-4.39035
CLCN3	1.59761e-134	0.412635	0.786688
PCDH18	2.6136e-132	0.285975	1.32207
H2AFY	5.34079e-131	0.413828	0.68106
TUBB3	8.82548e-131	0.450774	1.15455
WNT8A	3.82331e-130	-1.17115	-7.27279
EN1	3.84862e-130	-1.89004	-3.66644
STMN2	6.40594e-130	-0.570943	-1.18122
DNMT3B	8.12983e-130	-0.602557	-1.11895
VEGFC	8.38203e-130	0.0573527	2.23376
RPL28	1.60436e-129	-0.144784	-0.210654
WSCD1	1.63438e-128	0.250107	1.37783
E330013P04RIK	1.94531e-127	0.0201161	3.09935
IFITM1	5.10777e-126	-0.521038	-1.12437
SOX9	6.1738e-126	0.412508	1.34968
TMEM108	2.77841e-125	0.349972	1.22832
CERS4	3.59194e-125	0.21119	1.4165
SLC9A3R1	4.0734e-125	-0.425563	-1.04495
FABP7	1.93792e-124	-0.665104	-2.9708
CRABP2	3.81467e-123	0.747583	0.893833
FABP5	3.07848e-122	0.220752	0.323519
PIM2	5.76551e-122	-0.719046	-1.85852
MGARP	1.36419e-121	0.247628	1.17514
SRSF9	1.25703e-120	0.279426	0.442796
HSPB1	9.57514e-120	-0.637843	-5.20102
RAVER2	5.94813e-119	0.2038	1.1613
TENM4	8.05716e-119	0.540303	0.99567
MTSS1	3.47747e-118	0.321459	1.10381
FEZF2	4.62752e-118	0.105275	2.00312
ATP5K	1.41544e-117	-0.349368	-0.585131
IFITM3	1.73466e-117	-0.504718	-1.6644
IPO5	8.80181e-117	0.321981	0.538524
CKB	6.0099e-116	-0.57497	-1.80644
RPL18A	1.92064e-115	-0.136626	-0.198168
NRIP3	6.81974e-114	0.0548742	2.27657
SLC1A3	2.16054e-113	-0.505239	-2.31139
HOXA1	5.23603e-113	-2.28566	-7.15595
PGM2	1.02274e-111	-0.392404	-1.35818
PLCB4	1.78818e-111	0.300969	1.06082
TOX3	1.85701e-111	0.535639	1.01104
MTCL1	2.13315e-111	0.38277	0.907377
GAS1	1.29144e-110	0.426014	0.996544
NTF3	2.43154e-110	0.0221126	3.13708
NDN	2.88717e-110	0.46279	0.781635
HOXB1	2.72498e-109	-1.78549	-7.28558
UCHL1	4.43398e-109	0.451443	0.921676
AQP4	1.46891e-108	0.0167121	3.01119
MAOB	1.37392e-107	0.0840243	1.78989
RPS8	2.94336e-107	-0.120471	-0.177817
PAK3	2.0396e-105	0.208095	1.4043
PKDCC	2.05078e-105	-0.502338	-1.44731
CXCL12	3.45264e-104	-0.971726	-4.29037
SERF1	7.86479e-104	0.511293	0.786478
IMMP1L	2.47915e-103	0.305711	0.553239
TMEM38B	2.50154e-103	0.20505	1.18799
FEZF1	2.58216e-103	0.188372	1.16634
APELA	6.51625e-103	-0.920774	-4.77105
BEX3	2.19265e-102	-0.292873	-0.443576
LHX2	3.14624e-102	0.30716	1.38201
CHST2	3.92088e-102	0.376513	1.16093
NDUFB8	7.58585e-101	0.215121	0.317853
SV2B	1.17457e-100	0.00589279	4.10198
GNB2	1.37237e-100	-0.271701	-0.532649
WLS	4.55835e-100	0.689939	0.984147
CYP26A1	3.23653e-98	-0.99386	-3.96215
ECI1	7.95625e-98	-0.450383	-1.68455
RPL37	1.43894e-97	-0.203799	-0.30868
GM10076	8.8402e-97	-0.500225	-0.751459
HOXB2	9.0041e-97	-1.27904	-3.83278
ZFP365	9.0963e-97	0.0733345	1.75583
TMEM132C	2.31948e-95	0.163127	1.40695
ALYREF	3.5513e-95	0.283855	0.436419
FAM204A	1.59836e-94	0.317263	0.62332
BRINP2	9.79674e-94	0.0262416	2.61525
PCSK1N	1.45395e-93	0.697855	0.99182
GCSH	1.54516e-93	0.277555	0.493289
ASTN1	4.66237e-93	0.0898928	1.55882
MAPKAPK2	7.47926e-93	0.26348	0.921402
EXOC5	7.66751e-93	0.350824	0.866301
MKRN1	4.01293e-92	-0.344285	-0.755444
APOE	5.52261e-92	-0.435693	-0.915751
APOC1	1.83182e-91	-0.545922	-2.99006
NOG	3.10629e-91	0.0525895	2.09508
PLAGL2	8.12954e-91	0.318211	0.874819
NDUFA12	1.27523e-90	-0.300823	-0.547101
FGFR2	1.42035e-90	0.354939	0.960433
GM42637	7.47587e-90	-0.576745	-3.59225
CTXN1	1.2548e-89	0.313889	0.709327
TGIF1	1.46344e-89	0.344281	0.691802
UNC119	1.46344e-89	0.321741	0.637914
FUOM	1.82745e-89	-0.602209	-4.16381
ATP5L	2.12432e-89	-0.256374	-0.437517
NECAB2	2.31211e-89	0.159625	1.30113
SEPT4	3.60902e-89	0.077738	1.66495
VRTN	2.71949e-88	-0.672044	-4.49022
IRX1	5.40906e-88	0.239487	0.938665
RASGRP2	7.22426e-88	-0.427186	-1.17504
KLHL13	8.04384e-88	0.200498	1.04342
GUCY1B3	1.49724e-87	0.0201497	2.6466
HMGB3	1.80348e-87	0.223959	0.34186
RAB25	2.89767e-87	-0.624992	-3.34311
CPE	1.20754e-86	0.30096	0.786268
H2-K1	1.48972e-86	0.422619	0.784535
CLDN6	1.52918e-86	-0.734255	-4.07695
TMEM256	1.69138e-86	-0.27744	-0.575459
PAPSS1	3.29023e-86	0.274917	0.641708
LRRN1	3.29023e-86	0.131063	1.22302
HDAC6	7.20411e-86	0.415371	0.899158
GRTP1	1.40374e-85	0.198336	0.972326
EMX1	1.73539e-85	0.0117729	3.14298
SALL4	4.52058e-85	-0.341711	-0.765419
GRRP1	5.47854e-85	0.228054	1.05732
ARHGEF9	6.52428e-85	0.0757486	1.64497
DLL1	1.26451e-84	0.117235	1.57098
WNT5B	3.25475e-84	0.146572	1.29939
APP	7.835e-84	0.288533	0.85829
YBX3	9.72896e-84	0.233762	0.379725
HESX1	1.26499e-83	-0.715263	-1.99556
TLE4	5.5173e-83	0.56791	0.786886
COX8A	5.5173e-83	-0.179824	-0.272986
CRB2	1.29941e-82	0.1879	1.06613
SCD2	1.40901e-82	0.335708	0.573606
SORBS2	4.39902e-82	0.203808	1.20211
ZFP703	1.49352e-81	-0.686264	-2.35025
PRTG	2.64982e-81	0.36107	0.57595
ASB4	5.5494e-81	0.0417191	2.11108
HNRNPA1	9.86019e-81	0.140151	0.209686
EID1	1.95106e-80	0.248566	0.408627
TMEM238	2.27937e-80	-0.460028	-2.19052
H3F3A	2.70481e-80	0.147124	0.217756
HOPX	4.05861e-80	0.208665	1.30543
YWHAQ	5.03296e-80	0.183086	0.280028
RPL34	7.44834e-80	-0.125966	-0.185152
PHOX2A	1.80517e-79	-0.604761	-2.96304
RPS29	3.90978e-79	-0.211595	-0.312019
FGF3	1.20527e-78	-0.684556	-3.30723
SNRPN	1.27763e-78	-0.309256	-0.653387
LMO4	2.22195e-78	-0.311706	-0.670275
HIPK2	4.79134e-78	0.343655	0.716133
ELP4	3.14411e-77	0.282804	0.637106
AP1M2	5.32846e-77	-0.50922	-3.56849
RPL36A	2.62777e-76	-0.121945	-0.179459
HES3	4.25345e-76	-0.621521	-1.47033
FBLIM1	5.22737e-76	-0.457105	-2.42215
HPF1	1.56393e-75	0.219506	0.367428
GREB1L	3.75361e-75	-0.309252	-0.83762
ADA	5.09002e-75	0.057156	1.66901
RAPH1	2.36503e-74	0.31704	0.780483
RUFY3	3.92813e-74	0.224345	0.988206
P3H2	6.08456e-74	0.0714564	1.56744
LRTM1	6.34753e-74	0.01545	3.04015
CACYBP	1.30685e-73	0.200724	0.314991
DNAJC24	1.86864e-73	0.285283	0.563073
NR2F1	2.24637e-73	0.357641	0.598215
IGDCC3	2.39432e-73	0.40844	0.937787
X1700025G04RIK	1.52112e-72	0.288331
MIR17HG	3.15086e-72	0.369871	0.747949
ZFHX3	3.56161e-72	0.306179	0.951021
PTPRM	5.51951e-72	0.0336246	1.9843
DDAH2	7.24579e-72	0.274665	0.478906
RGMB	2.23272e-71	0.163979	1.18834
EBF1	3.17393e-71	-0.449431	-2.00738
CHN2	4.15909e-71	0.0907567	1.37331
RPS21	7.98974e-71	-0.163956	-0.242103
PLA2G16	8.86742e-71	-0.347386	-1.80946
LFNG	1.56378e-70	0.161442	1.13303
SEMA6A	1.84863e-70	0.219076	1.08457
LGR4	2.29884e-70	-0.354895	-1.44685
NTM	4.58838e-70	0.0450505	1.81472
DDIT4	6.0648e-70	-0.361885	-0.900118
ADAMTS9	1.36479e-69	0.126973	1.27434
ROBO2	1.50344e-69	0.0861141	1.48801
IFT57	3.50263e-69	0.249442	0.790707
FRZB	4.00866e-69	0.136566	1.12168
GM3764	4.23132e-69	0.00816514	3.43527
C1QL1	5.34808e-69	0.193776	0.954619
ZIC1	5.5995e-69	0.0723511	1.87136
FAM49B	2.80399e-68	0.268605	0.485395
SLC25A5	4.31852e-68	-0.223369	-0.380155
TXN1	6.36917e-68	0.154533	0.232187
PSAT1	4.1107e-67	0.276216	0.500587
NANOG	5.00176e-67	-0.625439	-4.2778
X6330403K07RIK	6.02592e-67	0.298134
LGR5	1.68076e-66	0.0331624	2.05632
GM27032	2.82443e-66	0.138464	1.17462
SIKE1	2.89405e-66	0.300208	0.614554
NUP62CL	3.55334e-66	0.106256	1.16924
NHS	8.57487e-66	0.143595	1.10143
VAMP8	1.26605e-65	-0.338387	-1.4275
FZD5	1.69173e-65	-0.587082	-2.1495
SOX6	3.51519e-65	0.058334	1.67177
RPL6	3.61841e-65	-0.135215	-0.203455
DPYSL3	3.75529e-65	0.212355	0.86622
GALT	1.32734e-64	-0.374787	-2.3781
X1700027J19RIK	3.84043e-64	0.270077
PRKCI	4.09626e-64	0.205264	0.868173
HMGN3	4.75329e-64	0.337959	0.619796
TBC1D4	6.67685e-64	0.0853599	1.2433
PTCH1	6.92467e-64	-0.533767	-1.3448
ENPP2	7.03168e-64	0.0525616	1.57255
ATP5B	1.60794e-63	-0.197731	-0.309952
NKX1-2	3.03862e-63	-1.06827	-4.85992
FAM110B	4.179e-63	0.129846	0.982321
SPINK1	5.23767e-63	-0.52581	-3.15331
FAM189A2	5.36357e-63	0.0467824	1.78501
UQCR10	8.05746e-63	-0.187743	-0.31388
NDRG2	8.05746e-63	-0.440587	-3.18683
ZBTB16	1.03363e-62	0.290699	0.871153
ENO1	1.10068e-62	-0.194311	-0.289278
LAMTOR4	1.92483e-62	-0.232629	-0.534808
SLIT2	3.50554e-62	0.0912963	1.41967
DCLK1	3.60535e-62	0.101724	1.23044
RBM11	4.16192e-62	0.0280586	2.11886
ZFP36L1	5.09881e-62	0.390672	0.623458
RPS27	7.13448e-62	-0.163556	-0.238488
GTF2IRD1	2.38509e-61	0.278043	0.667095
TSPAN2	2.49634e-61	0.0918361	1.3107
ZFP608	3.77277e-61	0.301244	0.659595
PAX2	4.50543e-61	-0.429188	-1.25763
RPL37A	4.60008e-61	-0.145785	-0.215094
COL1A2	5.30844e-61	0.0822051	1.47844
TRIL	5.88629e-61	0.0716705	1.49364
GM10260	6.12261e-61	-0.219703	-0.346425
CRABP1	1.84751e-60	-0.659711	-1.22774
SNRPF	3.84198e-60	0.184915	0.278293
LAPTM4B	8.1444e-60	0.236539	0.771954
GPC6	8.23624e-60	0.28871	0.652156
RPL36	1.19619e-59	-0.13511	-0.196091
SLC7A3	1.67852e-59	-0.37685	-1.93203
SKIDA1	2.35753e-59	0.248572	0.794612
LIN28B	3.21072e-59	0.271602	0.510565
DPYSL4	3.47978e-59	0.107119	1.22271
PNP	4.43246e-59	-0.228385	-0.54388
RPA3	6.05173e-59	0.326836	0.51308
OAF	1.00342e-58	0.133623	0.972622
MYLK	1.34585e-58	0.217412	0.933726
LSM2	4.28915e-58	0.168606	0.273558
UTF1	5.97656e-58	-0.6139	-4.36473
SP9	9.36628e-58	-0.498807	-3.22508
OLIG3	1.10085e-57	-1.0629	-5.68358
MEG3	1.8513e-57	0.420284	0.633502
SPRY2	1.85447e-57	-0.43689	-1.38347
ZSCAN10	3.2571e-57	-0.326844	-1.526
MYL7	5.20416e-57	-0.350614	-2.38049
RPS9	5.80762e-57	-0.118487	-0.171267
LEF1	6.56245e-57	0.29375	0.775498
CADM1	7.17184e-57	0.278683	0.508148
PEG10	9.4373e-57	0.185103	1.03673
LARGE2	1.08032e-56	0.181419	0.895996
RPRM	1.28958e-56	0.191371	0.987325
ABCG5	1.48788e-56	0.0305738	1.90377
BTF3	2.53477e-56	0.113926	0.167734
OLFM1	4.5573e-56	0.207278	0.598069
COX7C	5.10274e-56	-0.154248	-0.229942
GLDC	6.16665e-56	0.234494	0.738062
GALK1	1.58511e-55	-0.214342	-0.468453
CHD1	1.85228e-55	0.203866	0.334582
ORMDL3	2.32124e-55	0.225866	0.601121
CXCR4	2.98597e-55	0.125041	1.10961
HMGN1	4.37854e-55	0.0973277	0.140735
CAPG	4.50102e-55	-0.340251	-2.12514
GPRC5C	5.22021e-55	-0.324009	-1.22547
SH3GL3	5.7583e-55	-0.332652	-2.24612
LMX1B	6.51679e-55	-0.353847	-1.86513
SH3GLB1	8.08665e-55	0.264852	0.51123
FOXD1	1.66717e-54	0.141528	1.27064
ATP5A1	1.66879e-54	-0.169117	-0.298272
PHLDA2	1.88993e-54	-0.383557	-1.57869
FGF15	2.22457e-54	-0.369931	-1.21001
SALL2	2.32409e-54	0.338043	0.599086
SSX2IP	2.65117e-54	0.207196	0.710855
DLK1	3.77251e-54	0.139657	1.19067
NKX2-9	4.52181e-54	-1.27039	-3.95939
SEMA3E	5.38031e-54	-0.685011	-4.08352
PIPOX	6.44405e-54	-0.279913	-1.40479
ZMYND8	8.07697e-54	-0.262065	-0.560358
NTRK2	1.71186e-53	-0.409602	-2.67199
X1700019D03RIK	2.23037e-53	-0.370487
CCNB1IP1	3.37936e-53	-0.609669	-5.27628
POLR2L	7.31561e-53	-0.273504	-0.65242
MSI1	7.67836e-53	0.268184	0.520406
CLDN7	1.32413e-52	-0.469607	-2.86669
EN2	1.37124e-52	-0.923625	-3.64081
DCDC2A	1.46645e-52	0.0376903	1.77792
GM11627	1.47668e-52	-0.289949	-1.47043
NKX6-1	1.50848e-52	-0.540056	-2.0584
CBX3	1.90205e-52	0.195306	0.301413
SPARC	2.25408e-52	-0.280958	-0.607262
PKM	2.55591e-52	-0.114509	-0.167584
MPP6	4.14957e-52	0.226571	0.393694
TNFRSF19	7.64977e-52	-0.333791	-0.902134
SPRED1	8.62564e-52	-0.314837	-0.818589
ECHDC2	9.7182e-52	-0.287946	-1.30634
WBP5	1.22343e-51	-0.175305	-0.288483
A330008L17RIK	1.27374e-51	0.00609285	3.20462
SYT11	1.35276e-51	0.287156	0.71377
CCND1	1.70941e-51	-0.291859	-0.562625
ISOC1	1.78584e-51	0.248937	0.518102
TGFB1I1	1.92124e-51	0.0508584	1.62823
FHDC1	1.92124e-51	-0.341421	-2.20809
DSG2	2.10928e-51	-0.398661	-3.12846
RPL35	2.71375e-51	-0.188089	-0.278301
CDX2	2.87682e-51	-2.1219	-8.25397
HOXA2	3.05221e-51	-0.82258	-3.76501
FZD1	3.53171e-51	0.0607156	1.37027
HIST1H2AP	4.21048e-51	-0.639484	-1.04385
OAT	5.17348e-51	-0.316074	-0.797672
HIST1H2AK	6.54572e-51	-0.503378	-0.938279
THBS1	6.59646e-51	0.125748	1.31046
MEX3B	8.95301e-51	0.26887	0.806189
SF3B6	1.51818e-50	0.160179	0.23789
INA	2.5608e-50	0.316649	0.758275
EFNA2	2.68488e-50	0.300257	0.78316
H2AFZ	3.76762e-50	0.101404	0.142019
ARSI	4.03231e-50	0.0262689	1.98589
OST4	7.53722e-50	0.191652	0.3138
IRX2	9.22117e-50	-0.426583	-1.37253
TSPO	1.63956e-49	-0.267847	-0.757037
BRI3	1.78903e-49	-0.193606	-0.370081
CECR2	2.53197e-49	0.225954	0.425339
RPS2	3.04722e-49	0.121267	0.174772
HSPA4L	3.22995e-49	0.207192	0.830946
GNA14	3.24695e-49	-0.47171	-3.59833
ZFP422	3.54676e-49	0.265003	0.492453
CABP7	4.78483e-49	-0.51091	-3.9108
FNDC3C1	6.55156e-49	-0.279807	-0.69193
A830018L16RIK	7.57989e-49	-0.319774	-1.7776
MRPL34	8.24168e-49	-0.242218	-0.412716
HELLS	1.50113e-48	-0.240795	-0.41307
LRPAP1	1.60913e-48	-0.247075	-0.73216
TTC9C	1.78e-48	0.235878	0.525609
NDUFA7	2.60195e-48	-0.145926	-0.240011
BAZ1A	3.16562e-48	0.299304	0.651128
EPB41L4A	3.42544e-48	-0.317303	-1.43907
RAB11FIP2	3.46864e-48	0.179759	0.703043
SIM2	3.72232e-48	0.0142659	2.59565
MIR124-2HG	4.19165e-48	0.264945	0.745222
DUSP9	5.7848e-48	-0.29649	-1.48437
DHX32	6.60671e-48	0.194397	0.713415
SLC15A2	8.81417e-48	0.0636349	1.10471
KCNA5	8.90593e-48	0.0218411	2.03263
IDI1	1.14123e-47	0.287832	0.583467
NR1H5	1.22352e-47	0.26091	0.574402
SOX12	1.28946e-47	0.24028	0.547683
MDGA2	1.28946e-47	0.0213332	2.15395
HES5	1.75462e-47	0.3056	1.04348
TMED2	2.29837e-47	0.201729	0.344263
TOMM7	2.38387e-47	-0.160378	-0.235424
CDX1	2.56891e-47	-1.00114	-3.47536
EPHB1	2.62601e-47	0.213436	0.81109
HN1L	3.83659e-47	0.217966	0.422324
CD9	4.10413e-47	0.242109	0.595146
PFDN2	5.91101e-47	0.176838	0.262693
LMO1	6.8198e-47	0.272233	0.53387
MEIS1	8.87152e-47	-0.3293	-1.25002
SCG5	9.94924e-47	0.189884	0.788137
RBM38	1.21358e-46	0.195904	0.680911
GRIK3	1.3432e-46	-0.291265	-2.28129
X1600014C10RIK	1.3509e-46	0.070158
ZFAND5	1.4878e-46	0.218954	0.386227
SP8	1.55964e-46	0.281123	0.733144
TMEM163	1.79131e-46	-0.297019	-2.20829
ADD3	1.88786e-46	-0.248488	-0.648463
PABPC1	3.0435e-46	0.157593	0.245544
MSX3	3.79205e-46	-0.640629	-3.17545
CACHD1	3.89433e-46	0.238468	0.665804
HSP90AB1	5.18214e-46	-0.124969	-0.182382
HSPB8	8.12408e-46	0.0394374	1.62799
TSHZ1	1.06332e-45	-0.376056	-1.79311
POLR3K	1.34717e-45	0.195684	0.350539
PDE7A	2.112e-45	0.231782	0.518596
SOX13	2.56744e-45	-0.261644	-0.816083
FAM216A	3.69067e-45	0.230875	0.524114
NSG2	4.43765e-45	-0.308939	-1.43699
GMFG	4.51912e-45	-0.262944	-1.45957
RPL18	4.91442e-45	-0.086987	-0.129523
PLS3	6.13545e-45	0.317314	0.524371
RPL38	7.41996e-45	-0.143638	-0.2126
EPHA1	7.98358e-45	-0.360495	-2.68439
MIF	9.594e-45	-0.10236	-0.146791
IVNS1ABP	1.03454e-44	0.218042	0.39581
SOX5	1.20848e-44	0.110567	1.01332
PCNT	1.23881e-44	-0.293661	-0.836477
ADD1	1.59078e-44	0.20912	0.560147
CGNL1	2.572e-44	-0.354294	-1.65306
SLC35B1	2.74202e-44	0.236167	0.467215
JAG1	2.80111e-44	0.22021	0.819237
HNF1B	3.61829e-44	-1.16089	-7.98455
ELAVL1	4.80574e-44	0.17616	0.298115
CELF2	5.0941e-44	0.299847	0.67242
PMCH	6.79023e-44	0.00120829	5.10694
CAR14	8.15026e-44	-0.252548	-0.663457
TIGD2	8.75488e-44	0.192827	0.650222
DSTN	9.17343e-44	-0.173324	-0.309202
PAX8	9.17343e-44	-0.509599	-2.52339
SMCO4	9.74759e-44	0.247423	0.468742
RPL10A	1.00216e-43	-0.0910759	-0.132067
RSL1D1	1.01592e-43	0.157031	0.262448
MARCH9	1.21258e-43	0.190576	0.542158
NIP7	1.27438e-43	0.187877	0.326859
COMMD3	1.75689e-43	-0.247473	-0.728514
JUND	1.87898e-43	0.276324	0.476253
ACER2	2.4606e-43	-0.291426	-0.648347
SHB	2.86765e-43	-0.266689	-1.51092
X2610027F03RIK	3.04167e-43	-0.805414
CCDC177	4.02847e-43	0.156698	0.79324
GRB7	4.02847e-43	-0.262429	-1.24533
OTX2OS1	4.29508e-43	0.0355837	1.67864
PTPRA	4.38015e-43	0.220871	0.556579
MTPN	6.71731e-43	0.194283	0.352622
ODC1	6.71731e-43	0.176582	0.293965
GGCT	7.79981e-43	-0.226282	-0.755052
NCAM1	1.01392e-42	-0.27182	-0.930937
MARK3	1.78311e-42	0.231596	0.455459
EAF2	1.81523e-42	0.0277477	1.70389
YWHAZ	1.89413e-42	0.1816	0.294886
ZFP266	2.20207e-42	0.225101	0.404086
FBN2	3.14041e-42	0.205393	0.82433
NECTIN1	3.15995e-42	0.186123	0.607991
LMO3	3.16985e-42	0.0905557	1.09205
TAGLN2	4.48312e-42	-0.258126	-0.599239
EFNB1	4.48312e-42	-0.30901	-0.781058
LMX1A	4.82448e-42	0.0281144	1.7773
HPRT	5.0636e-42	-0.233761	-0.519179
ATP5E	5.86614e-42	-0.133534	-0.198789
CDH8	6.46285e-42	0.006043	3.09545
ANXA11	7.16036e-42	-0.26903	-2.09585
NKX6-2	1.33053e-41	-0.642601	-2.83757
X5730559C18RIK	1.33306e-41	-0.226832
CLCN5	1.58309e-41	0.189207	0.573571
BST2	2.27151e-41	-0.254669	-0.911019
MAPK13	2.41181e-41	-0.301201	-2.50475
UBE2D3	2.42578e-41	0.145043	0.207319
MYO10	2.87183e-41	-0.254081	-0.584211
MYC	4.51044e-41	0.18092	0.847627
OAZ1	4.846e-41	0.100428	0.143898
ARHGEF26	5.00987e-41	-0.254013	-1.40684
FREM1	5.77274e-41	-0.369943	-2.85896
C430049E01RIK	7.29229e-41	-0.317005	-2.69609
PEG12	1.006e-40	0.206474	0.696808
PAX5	1.4089e-40	-0.381987	-1.49286
CENPV	1.5796e-40	0.190569	0.62976
BMP7	1.9825e-40	0.0955431	1.01314
ZFP706	2.09683e-40	0.153735	0.235564
ADGRL2	3.22151e-40	0.286033	0.515402
TNRC6C	3.81624e-40	-0.198588	-0.397297
MIAT	4.30197e-40	0.151853	0.891315
GNG3	4.85904e-40	-0.248469	-0.769597
RHEB	4.99918e-40	0.17653	0.300806
BCAM	5.12317e-40	-0.232711	-1.13055
PKIG	6.0771e-40	0.186504	0.334659
BTBD17	6.46522e-40	-0.285719	-0.965316
EPHA4	7.18644e-40	0.333096	0.554877
IGFBP4	7.36611e-40	0.227868	0.515018
PAM	7.91574e-40	0.19689	0.785586
ETV5	9.69127e-40	-0.268796	-1.57524
RNF7	9.76411e-40	0.143858	0.21973
CDK6	1.04657e-39	-0.227862	-1.26221
ZFP800	1.23515e-39	0.185395	0.746005
CYBA	1.36009e-39	0.209535	0.45849
SPARCL1	1.71105e-39	-0.442937	-3.31372
MEX3A	1.77476e-39	0.222587	0.423473
NECTIN3	2.08714e-39	0.225339	0.446595
ERAS	2.16455e-39	0.269096	0.43837
MAP1B	2.51541e-39	-0.212901	-0.372751
ZCCHC11	2.76129e-39	0.202037	0.354877
FOXA2	2.76487e-39	-0.815052	-3.31022
CPNE4	2.82176e-39	0.0273403	1.73119
MEOX1	3.01512e-39	-0.701627	-5.43079
CNN3	3.52137e-39	0.17253	0.296034
RPL13	3.59147e-39	-0.0865851	-0.126348
GSTM7	4.62428e-39	-0.309695	-3.12653
PTPRZ1	5.28664e-39	0.190813	0.844084
AKIRIN1	5.97709e-39	0.195068	0.392959
RAX	9.07382e-39	-0.0186162	-0.273477
KYNU	1.05481e-38	-0.40934	-3.83773
R3HDM1	1.10791e-38	0.223268	0.422425
FUBP1	1.18766e-38	0.134365	0.199582
OLIG2	1.25379e-38	0.0100784	2.90055
URM1	1.29159e-38	-0.213452	-0.684188
RPS14	1.66069e-38	-0.0715898	-0.104717
NEUROG1	1.83326e-38	0.0142854	2.73409
LHPP	2.13528e-38	-0.253945	-0.890048
RPL31	2.38389e-38	-0.0984492	-0.146596
EEF1E1	2.53901e-38	0.189903	0.349596
YAF2	2.60468e-38	0.223078	0.442837
NDUFC1	2.64872e-38	-0.154523	-0.258218
KCNA1	3.15669e-38	0.0405173	1.33998
F2R	3.88849e-38	0.21917	0.591028
FOXB1	4.81871e-38	-0.343368	-0.779396
RPL13A	5.5796e-38	-0.169737	-0.298658
PAFAH1B2	5.94771e-38	0.194654	0.368827
ALDOA	6.51487e-38	-0.109848	-0.158495
MORF4L2	6.59396e-38	0.179409	0.277001
FLRT3	6.74476e-38	0.337167	0.618807
NEXN	7.04806e-38	0.0945385	1.05747
COL4A6	7.11836e-38	0.0543718	1.21846
RPL9-PS6	8.2159e-38	0.157359	0.258346
PPA1	8.76206e-38	0.143542	0.217414
ATP5O	9.7267e-38	-0.149727	-0.251159
SOX11	1.07521e-37	0.204836	0.324924
RPL14	1.11621e-37	-0.078701	-0.114033
EIF1A	1.61147e-37	0.181421	0.316965
SDF2L1	2.13821e-37	0.223049	0.420769
DOCK7	2.30032e-37	0.238274	0.52522
ESRP1	2.60586e-37	-0.325116	-2.84105
COL18A1	2.62841e-37	-0.213714	-0.473906
FAU	2.74158e-37	-0.0973061	-0.145656
RHOA	2.76111e-37	0.136163	0.2155
FSD1L	3.41535e-37	0.158463	0.745762
GNB1	3.43208e-37	0.147829	0.244955
BCCIP	3.85608e-37	0.180932	0.323019
PLATR10	4.38068e-37	-0.669443	-6.32873
PCNP	4.58873e-37	0.181792	0.318321
CLDN10	4.70228e-37	-0.356921	-1.99042
GALNT1	5.15818e-37	0.245638	0.509892
MAPK3	6.06236e-37	-0.191071	-0.472912
CD59A	6.9783e-37	0.12475	0.821373
AXIN2	8.26881e-37	0.25165	0.698411
GPX4	9.28859e-37	-0.158519	-0.256498
CCND3	9.34024e-37	0.174774	0.325667
MEX3D	9.57315e-37	0.188262	0.574002
SOBP	9.68108e-37	0.0880674	0.960205
ARF4	1.27599e-36	0.174899	0.302914
POU3F2	1.47761e-36	0.171105	0.796429
NUDCD2	1.49058e-36	0.150087	0.252043
LLGL2	1.89324e-36	-0.25176	-1.96787
FAM57B	1.95189e-36	-0.235478	-0.896765
RPS19	1.97652e-36	-0.078174	-0.110979
YAE1D1	2.00224e-36	0.186062	0.337842
MARCKSL1	2.0392e-36	0.127351	0.176879
TENM3	2.49399e-36	0.224547	0.557562
FABP3	2.62132e-36	-0.215135	-1.57487
TRIB2	2.80523e-36	-0.235762	-1.23035
SP5	3.20669e-36	0.221964	0.950477
BCAS2	3.28368e-36	0.139716	0.195182
RAB38	4.17999e-36	0.064337	0.992955
NID2	4.46369e-36	0.080082	1.00933
PFN1	4.48385e-36	0.109778	0.145559
FAM171B	4.73916e-36	0.136199	0.793583
RPL36AL	4.89668e-36	-0.106706	-0.165261
SEZ6	5.02971e-36	-0.312217	-2.87613
CMTM7	5.16099e-36	0.194831	0.48896
IRS2	6.16544e-36	-0.221649	-0.800691
MAPK1IP1L	6.85865e-36	0.212145	0.407346
PPM1H	1.24141e-35	0.0259361	1.64719
PDLIM1	1.29455e-35	-0.238117	-1.42027
ACOT7	1.29523e-35	0.202097	0.558065
YWHAB	1.76374e-35	0.134235	0.212663
SHROOM3	1.83997e-35	-0.230208	-0.867693
TOMM5	1.86666e-35	0.150554	0.247088
TTR	2.25685e-35	-0.475453	-4.18186
PPP2R5C	2.65297e-35	0.176758	0.461125
MT-ND6	2.77686e-35	0.297289	0.543093
CELRR	2.86585e-35	-0.488576	-4.56688
NDUFS4	2.87037e-35	-0.151387	-0.303513
SELENOP	3.62702e-35	-0.311392	-2.18644
EPS8	5.62956e-35	-0.232287	-1.03559
MRPL42	6.75136e-35	-0.15323	-0.286339
CAR3	7.44783e-35	-0.222651	-1.54192
CAPSL	7.52419e-35	-0.245978	-2.44458
POU4F1	7.84684e-35	0.0305195	1.55409
IGSF3	1.03407e-34	0.0938574	0.763139
SALL3	1.22716e-34	0.196446	0.563711
ETV1	1.27152e-34	-0.223235	-1.77348
VGLL3	1.2947e-34	-0.903882	-3.67775
ERDR1	1.40051e-34	0.188895	0.290422
SRP9	1.46269e-34	0.160066	0.264976
ROBO3	1.49254e-34	-0.441886	-4.03309
KDELR2	1.62092e-34	0.189773	0.347904
ILDR2	1.70871e-34	0.329753	0.548871
SPIN4	1.72635e-34	0.0444505	1.33922
SNHG20	2.0284e-34	0.213874	0.43193
TMEM263	2.2936e-34	0.163279	0.649038
SPTSSA	2.29862e-34	0.162479	0.282386
KDF1	2.33785e-34	-0.316609	-3.51468
HIST3H2BA	2.62552e-34	-0.223221	-0.713645
OPCML	2.69116e-34	-0.339641	-1.86929
PCDH17	2.88935e-34	0.0673504	1.08071
PLAGL1	2.99999e-34	-0.298224	-2.20809
COX20	3.76536e-34	-0.206117	-0.561557
AU022754	4.39301e-34	0.00217576	3.6677
TCEAL5	4.41567e-34	-0.202988	-1.09893
COX6A1	4.60863e-34	-0.142954	-0.26152
RBPMS	5.19329e-34	-0.199123	-0.519556
FYTTD1	5.57587e-34	0.182311	0.353961
X2900011O08RIK	6.12937e-34	-0.242286
TTC3	6.67288e-34	0.162258	0.264723
CASK	6.7188e-34	0.148562	0.704939
AHCYL2	6.80728e-34	0.148756	0.597782
GNGT2	1.0878e-33	-0.202547	-1.28038
GSTT1	1.48788e-33	-0.231099	-2.14111
TAB2	1.67573e-33	0.236087	0.473937
PHLDA3	1.69598e-33	-0.309159	-1.16964
TSPAN17	1.73416e-33	-0.454934	-4.64911
RBM3	1.79105e-33	0.128756	0.199706
H2AFY2	2.1167e-33	0.160179	0.263816
KDM5B	2.1167e-33	-0.17603	-0.321185
RNH1	2.21367e-33	-0.20695	-0.67493
PMAIP1	2.63184e-33	-0.203756	-1.54903
RAC3	3.17705e-33	0.157171	0.506655
RBMS2	3.51027e-33	0.183976	0.436031
RIPPLY3	3.55931e-33	0.0201432	1.8738
CRB3	3.68804e-33	-0.272816	-2.13761
ZFYVE9	3.81655e-33	0.181997	0.548368
RAD23B	4.19954e-33	0.160201	0.278426
CD2AP	4.48597e-33	0.185625	0.339937
NCBP1	4.54948e-33	0.165591	0.307836
SKAP2	4.7527e-33	-0.234217	-0.88707
TFDP2	5.33207e-33	-0.188807	-0.496632
RPL8	5.51495e-33	-0.0782768	-0.109617
MEST	6.15454e-33	0.410408	0.552638
RAP2C	6.3325e-33	0.124549	0.549588
SPON1	6.62784e-33	0.18346	0.557127
GDF11	6.97282e-33	0.1095	0.747826
POLR2M	7.38809e-33	0.141809	0.219971
ESD	7.45331e-33	0.132677	0.202296
ARHGAP29	8.2277e-33	-0.200941	-0.665906
RPL41	8.82007e-33	-0.0930681	-0.139283
TSPAN6	8.90919e-33	0.168181	0.283569
TUBA4A	9.50224e-33	-0.209392	-2.01278
UBE2N	9.61531e-33	0.133668	0.206059
NEK1	1.04936e-32	0.164965	0.529269
SLC7A7	1.47512e-32	-0.329261	-3.25674
ZIC4	1.55496e-32	0.0142192	2.17487
GLIPR2	1.62005e-32	-0.227801	-1.48195
HIST1H4H	1.82426e-32	-0.233831	-1.03038
PDZD8	1.85395e-32	0.183359	0.502102
ID2	1.8553e-32	-0.319762	-0.601292
JPH4	2.01279e-32	-0.229679	-1.05087
IKZF2	2.0726e-32	0.162531	0.700279
FIGN	2.07393e-32	0.252597	0.573182
ADAMTS19	2.12828e-32	0.0468689	1.22295
RRBP1	2.1458e-32	-0.186051	-0.330814
GSC	2.27481e-32	-0.447583	-2.77586
FZD8	2.33667e-32	-0.227486	-1.00642
AR	2.40918e-32	-0.19562	-1.38127
ABTB2	2.58903e-32	0.0205595	1.75947
JAM3	2.76413e-32	0.220643	0.425911
GRB10	2.88991e-32	-0.193803	-0.405677
GM10020	3.34702e-32	-0.222811	-0.591063
NHP2L1	3.5577e-32	0.108682	0.162738
SARNP	3.8106e-32	0.154382	0.235951
STX3	4.3724e-32	-0.224741	-0.994827
BLVRA	4.42047e-32	-0.205416	-2.29914
GM8797	4.88234e-32	0.191985	0.341955
BIN1	6.75076e-32	0.187865	0.437222
GM5786	7.5779e-32	0.204052	0.518155
NDNL2	8.85459e-32	0.181482	0.355975
CSNK1E	9.921e-32	0.169493	0.30189
NDUFB7	1.0805e-31	-0.130733	-0.258295
NNAT	1.0805e-31	-0.242052	-0.468122
SHISA2	1.17271e-31	0.209917	0.551652
CHST15	1.39318e-31	0.0482952	1.25009
RLBP1	1.57464e-31	0.00692311	2.56774
TUBA1B	1.71782e-31	0.119542	0.184949
FJX1	1.94271e-31	0.243688	0.505258
CFL2	1.947e-31	0.183599	0.345597
TLE1	1.97713e-31	0.182502	0.525525
NRP1	1.9812e-31	0.0767601	1.04573
CYTL1	2.04524e-31	0.0172249	1.92273
MED30	2.4476e-31	0.192613	0.363455
RBBP4	2.47155e-31	0.131294	0.205911
FXYD7	2.81864e-31	-0.254171	-2.37891
EPB41L5	3.1399e-31	0.195003	0.521672
SH3BGRL	3.35472e-31	0.182069	0.322707
RABGGTB	3.4692e-31	0.196201	0.373717
EID2	3.88236e-31	0.192701	0.398718
KLHL29	3.95665e-31	0.0400681	1.28608
FMO1	4.50155e-31	0.00949503	2.33434
NUAK2	4.68848e-31	0.189062	0.621255
RPS26	4.78967e-31	-0.0725372	-0.104745
GABRG1	5.16772e-31	-0.362404	-3.24038
GSTK1	6.29715e-31	-0.198688	-1.90894
DCUN1D1	8.15327e-31	0.187467	0.407045
RARG	8.15327e-31	-0.210313	-0.985503
TRMT10C	8.24508e-31	0.203328	0.426178
CROCC	8.65461e-31	0.130852	0.656504
FZD10	8.88138e-31	-0.160877	-0.821384
CACNA2D3	9.80453e-31	0.00574953	2.91872
PSMA3	1.00457e-30	0.109745	0.159437
CDH6	1.00773e-30	0.0455752	1.2184
FAM132A	1.05413e-30	0.0823739	0.880547
MIS18A	1.11029e-30	0.205329	0.424697
PPP4C	1.20104e-30	0.178008	0.327117
EFR3A	1.22637e-30	0.183998	0.468563
DCK	1.31965e-30	0.196693	0.482408
ATP5J2	1.39869e-30	-0.10666	-0.170897
GYG	1.44913e-30	0.151712	0.5371
DENND1B	1.56184e-30	0.0897998	0.788478
TRIM71	1.56184e-30	-0.161471	-0.330968
CHCHD2	1.58475e-30	0.0820794	0.117317
HNRNPH2	2.27374e-30	0.15891	0.293461
MRPL50	2.31027e-30	0.178146	0.344542
DAP	2.40271e-30	-0.182099	-0.5744
IGSF9	2.65812e-30	0.160595	0.534472
ARID3B	3.45207e-30	-0.223338	-0.553
CAR4	3.4713e-30	0.308943	0.572594
N4BP2	3.70339e-30	0.227778	0.464651
SNHG6	3.70851e-30	0.198728	0.385954
HNRNPK	3.94398e-30	0.105455	0.163929
MKRN3	4.19647e-30	0.115181	0.814417
HOMER2	4.86525e-30	0.130478	0.65533
ATP2B4	5.35227e-30	-0.248304	-2.20184
PPM1N	5.88743e-30	0.0619195	1.01763
CFC1	6.47172e-30		-25.4298
DYNC1H1	6.4837e-30	-0.227959	-0.534053
SOX4	6.51613e-30	0.187389	0.306625
IER5	6.55351e-30	-0.21804	-0.76251
CFAP20	6.96696e-30	0.153504	0.269874
FZD3	7.07796e-30	0.254151	0.522659
MACROD2	8.65942e-30	0.164823	0.525829
FGF8	1.04812e-29	-0.327971	-1.1532
RCN3	1.22223e-29	-0.198772	-0.610118
COX6B1	1.25187e-29	-0.103627	-0.161755
PCDH1	1.31406e-29	-0.19814	-1.22286
PTPRD	1.35186e-29	0.07029	0.98762
MSRB1	1.42907e-29	-0.195415	-0.673514
ZKSCAN3	1.5593e-29	0.179834	0.39568
KCTD6	1.5593e-29	0.0899044	0.811924
HSP90AA1	1.63742e-29	-0.129011	-0.182614
DTX3	1.83399e-29	0.172394	0.447643
CD63	1.90897e-29	0.189224	0.37085
ATXN10	2.01825e-29	0.141152	0.225993
OGT	2.17472e-29	0.200659	0.381998
TDRD7	2.27395e-29	0.0741185	0.929821
AP5M1	2.81594e-29	0.0988675	0.717393
PEG3	2.90224e-29	-0.247457	-0.576217
ELAVL2	2.96353e-29	0.200573	0.533554
RPL27-PS3	3.25092e-29	0.133017	0.214522
MSX1	3.25092e-29	0.129657	1.05461
ARF6	3.63966e-29	0.169286	0.35351
MAGED1	4.1463e-29	0.169481	0.317369
RFX7	4.33898e-29	0.198415	0.467076
CPSF6	4.44142e-29	0.16237	0.284632
NUTF2	4.51251e-29	0.1654	0.522636
PTP4A2	5.58575e-29	0.172296	0.284502
NTRK3	5.6315e-29	0.0649226	0.996252
CYP51	5.86283e-29	0.182175	0.554839
TIAM1	6.04037e-29	0.145933	0.666772
ASXL3	7.12753e-29	0.0419708	1.22668
JAKMIP1	7.26182e-29	-0.26392	-2.63028
MN1	7.65978e-29	-0.234414	-0.775826
ARL6IP5	7.90922e-29	-0.184969	-0.790759
NDUFB9	8.1655e-29	-0.12287	-0.199031
CNBP	8.40565e-29	0.12028	0.172344
PFN2	9.22179e-29	0.225342	0.442144
TANC1	9.49401e-29	0.0810636	0.740574
DMRT1	1.09453e-28	0.00862444	2.49965
[truncated: 8,331 more rows]

## Sheet: PhenoGraph cluster 6
gene	P-value (FDR adjusted)	MAST Hurdle	logFC
[truncated: 9,946 more rows]

[truncated: 8 more sheets: PhenoGraph cluster 7, PhenoGraph cluster 8, PhenoGraph cluster 9, PhenoGraph cluster 10, PhenoGraph cluster 11, PhenoGraph cluster 12, PhenoGraph cluster 13, PhenoGraph cluster 14]
