# Supplementary material for: A single-cell atlas of spatial and temporal gene expression in the mouse cranial neural plate
Source: bioRxiv preprint, doi:10.1101/2024.08.25.609458, version 3 (2025-03-06)
Supplement: Table S5 [file 609458_file09.xlsx]

## Sheet: Sheet1
	DC 0, P-value (FDR adjusted)	DC 0, Pearson R	DC 1, P-value (FDR adjusted)	DC 1, Pearson R	DC 2, P-value (FDR adjusted)	DC 2, Pearson R	DC 3, P-value (FDR adjusted)	DC 3, Pearson R	DC 4, P-value (FDR adjusted)	DC 4, Pearson R	DC 5, P-value (FDR adjusted)	DC 5, Pearson R	DC 6, P-value (FDR adjusted)	DC 6, Pearson R	DC 7, P-value (FDR adjusted)	DC 7, Pearson R	DC 8, P-value (FDR adjusted)	DC 8, Pearson R	DC 9, P-value (FDR adjusted)	DC 9, Pearson R
GNAI3	0.00523499	0.0336454	0.0884963	0.0231007	0.725423	0.00736228	0.0830783	0.0250064	0.716724	0.0103988	0.908455	-0.00626598	0.843222	0.00707573	0.542186	-0.0130608	0.0612418	-0.0272466	0.00950647	0.0328428
CDC45	0.0855572	0.0225604	1	0.00103456	3.10319e-09	0.0652542	0.346011	-0.0166904	0.713761	-0.0104585	0.795085	0.00877604	0.144289	0.0228	0.0299875	0.0301497	1	0.00285906	0.388553	-0.0146652
H19	1.43529e-26	-0.114391	0.192887	-0.0188096	6.90332e-154	-0.27363	9.48997e-05	0.0468097	0.0693903	0.0267137	0.859246	0.0073981	0.0494463	0.0280229	3.06264e-10	0.0714518	0.573982	-0.0122446	1.43328e-05	0.0507129
SCML2	0.171221	-0.0188552	0.144353	0.0205224	0.0818447	-0.0223132	0.634894	0.0112684	0.197034	0.0212556	0.972038	-0.00459155	0.785138	0.00824621	0.468063	-0.0145163	0.690678	-0.00996638	0.769866	0.00777235
APOH	0.452335	-0.011995	0.991307	-0.00251665	0.864234	0.00492007	1	-0.000272736	1	-0.000124584	1	-0.00293302	0.862616	0.00671801	0.97992	-0.00412062	0.599099	-0.0117805	0.950458	0.00439967
NARF	0.207173	0.0176901	1.24836e-14	0.0844246	3.90873e-13	-0.0789928	0.207229	-0.0200948	0.520654	-0.0139642	2.69714e-05	-0.050556	0.162617	0.022121	0.000182244	-0.045952	0.00250989	-0.038862	2.49555e-06	0.054487
CAV2	0.275084	-0.0158335	0.27955	-0.0163708	0.00439904	-0.0336509	0.697189	0.0101314	0.942976	0.00582231	1	-0.00052818	1	0.00184841	0.971231	0.00430151	0.884436	-0.00592717	0.0473232	0.0265571
KLF6	1.63465e-12	0.077384	2.66637e-17	0.0920912	0.0066924	-0.0322625	0.862641	-0.00694567	0.586464	-0.0127101	1	-0.00179427	1	-0.00136226	0.777299	0.00858967	0.766435	0.00838925	9.94016e-07	0.0563737
SCMH1	5.82216e-05	0.0462097	9.55955e-08	0.0601555	0.397388	0.0130256	0.00127685	0.0399377	0.0794032	0.0260784	1	0.000153744	0.969679	0.00421315	0.697479	0.0101126	0.624129	0.0112792	0.0187585	0.0303443
COX5A	6.511e-09	-0.0644506	1.861e-15	0.0868706	1.0303e-52	0.161557	0.0307978	0.029324	0.0659356	-0.0269364	0.589424	-0.0127475	0.00170963	0.0396952	1	-0.00302615	0.000260243	0.0451544	4.57867e-07	-0.0578823
TBX2	0.938414	0.00345301	0.000928386	-0.0395683	0.00679621	-0.0322112	1	-0.000272112	0.422361	-0.0158824	0.224965	0.02042	0.226119	-0.0200509	0.00202014	-0.0393689	1	-0.000578338	0.0695531	0.0248237
TBX4	0.89106	0.00427798	0.664637	0.00861233	0.393211	0.0131033	0.202617	0.020242	0.819781	-0.00844882	1	-0.00368724	0.289796	-0.0183738	0.876487	0.00658773	0.989162	0.00339299	0.83168	0.00673212
NGFR	0.0249204	0.0279966	0.728636	0.00743195	0.592739	-0.00953916	1	-0.000238281	0.711753	-0.0104995	0.530356	0.0138831	0.469471	-0.0144121	0.87612	0.00660554	0.352813	-0.016851	0.922816	-0.00498647
WNT3	1.09766e-27	0.116825	5.79188e-29	0.119791	7.06973e-24	0.108067	3.69192e-05	0.0490199	0.000253791	0.0450213	9.11475e-17	0.0920396	0.0103535	-0.034005	4.52525e-10	0.0708426	5.45962e-05	-0.0489847	9.5975e-95	0.216748
WNT9A	0.837579	0.00517854	2.51691e-33	0.128596	6.32739e-14	0.0815035	6.22534e-12	0.0767488	8.48296e-09	0.065912	5.05831e-11	0.0743516	1.85818e-05	-0.0510693	0.00765535	0.035135	8.08892e-10	-0.0700653	3.25926e-50	0.15863
FER	7.98572e-08	0.0599749	0.0515742	0.0256408	3.32827e-05	0.0469558	1	0.00159193	0.404884	0.0162407	0.048076	-0.028355	0.863565	-0.00669593	0.331662	-0.0174945	1	0.00295366	0.221818	0.0185903
XPO6	1	0.00121816	0.933404	-0.00366114	2.15167e-07	0.0576234	0.763032	-0.00892159	0.190562	-0.0214432	0.439412	-0.0155495	0.791596	0.00812181	0.281455	-0.0186996	0.641864	0.0109358	0.00643829	-0.0341804
TFE3	0.77945	0.00615719	4.69145e-10	-0.0692928	0.959177	0.00309327	0.963959	0.00464337	0.341632	-0.0175507	0.00814955	-0.0351033	0.857867	-0.00680164	0.000654946	0.0426292	0.0269581	-0.0307113	0.383744	-0.0147711
AXIN2	3.76609e-104	0.226305	0	0.39655	2.73797e-89	0.209876	3.18757e-62	0.176218	1.71528e-62	0.176856	6.03916e-22	0.105416	1.04793e-06	-0.0570358	0.0724935	0.0263594	0.138747	0.023136	3.39993e-19	0.0979103
BRAT1	0.681586	-0.00782531	1	-0.00209317	0.879851	0.00463059	1	-0.000448911	0.755767	0.00962721	1	0.000512804	0.969619	0.00421611	1	-0.00268011	1	-0.000121585	0.17977	0.0198429
GNA12	0.0113051	0.0309835	0.253561	0.017047	0.92589	-0.00375837	0.410259	-0.0153637	0.848557	0.00782658	0.320315	-0.0180466	0.236768	0.019746	0.756221	-0.00900601	0.889828	-0.00577977	0.288929	0.0168616
SLC22A18	5.23442e-07	-0.056377	0.304952	-0.0157629	0.106226	-0.0210303	0.166973	0.0213705	1	0.00373434	1	-0.000779509	0.444845	0.014922	0.761259	0.00888473	0.00932048	-0.0346688	1	0.00253516
IGSF5	0.882936	0.00442828	0.531917	0.0110663	0.681717	-0.0080727	1	-0.00336233	1	-0.00186788	1	-0.00148736	1	-0.00224557	0.126103	0.0235848	0.906887	-0.0054118	1	0.00046999
PIH1D2	0.00214205	-0.0364827	0.0284033	0.0281687	1	0.000903499	0.231036	0.0194336	0.83516	0.00808682	1	0.0014758	0.870848	0.006532	0.866075	-0.00682093	0.7903	-0.00791118	0.938973	0.00462065
DLAT	1	-0.000901753	0.224134	0.0178715	1.30794e-08	0.0627617	0.842569	0.00738462	1	-0.00282686	0.0671888	0.0268561	1	-0.00101799	0.433523	0.0152208	0.000135009	0.0467897	0.583459	-0.0110657
SDHD	8.56739e-05	-0.0452792	4.20501e-05	0.0475619	0.970209	-0.00286986	0.000145952	0.0457632	0.254886	0.0195805	0.88219	-0.00692069	1	-0.00290165	0.97199	-0.00427854	0.363565	-0.0166127	0.568947	0.0113105
FGF6	1		1		1		1		1		1		1		1		1		1
CCND2	2.48832e-25	0.111634	1.03133e-26	0.114987	0.000450922	0.0403923	1.38115e-160	0.279781	1.6519e-88	0.209877	0.250669	0.0197269	1.45031e-138	0.260683	2.06675e-28	0.119792	4.50426e-39	0.14066	3.66871e-172	-0.289348
GPR107	0.306367	-0.0150839	0.449626	0.0126833	0.544815	0.0103474	0.717657	0.00977171	1	0.000455878	0.169872	0.0220857	0.124615	-0.023599	1	-0.00111553	0.748682	0.00874108	0.302102	0.0165544
NALCN	0.291542	-0.015437	0.060886	0.0249013	2.83569e-22	-0.104247	0.796834	0.00830762	0.0964815	0.0251397	1	-0.00167922	0.766358	0.00863911	0.208751	0.020632	1	-0.00176612	0.902774	-0.00544243
BTBD17	1.08593e-05	0.0500755	2.51246e-45	0.150061	7.55802e-20	-0.0981892	8.65706e-50	0.157808	1.71686e-32	0.127873	4.62941e-16	-0.0900597	0.276952	0.0186975	9.41581e-10	-0.0696603	1.03734e-72	-0.191079	0.963392	0.00408795
SLFN4	1		1		1		1		1		1		1		1		1		1
TH	0.119821	-0.0208516	0.594952	-0.00989828	0.0244723	-0.0275372	1	-0.000613725	1	0.000251911	1	-0.00198506	1	0.00308667	0.7484	-0.00914705	1	-0.00252182	0.940047	0.00459083
INS2	1	-0.000532389	0.257727	0.0169358	0.469666	0.0116631	0.677945	0.0104902	0.773891	0.00930215	0.781766	0.00902504	0.864665	-0.0066788	0.803618	0.00806632	0.387531	-0.0160623	0.169834	0.0201838
SCNN1G	1		1		1		1		1		1		1		1		1		1
DRP2	0.195456	0.0180519	9.21073e-06	0.0509846	8.50313e-06	-0.0500661	9.41694e-13	0.0794222	1	0.0022746	0.280891	-0.0189498	0.137221	0.0230817	0.915105	-0.00577265	0.80926	-0.00754411	1	0.0014832
TSPAN32	0.992011	0.00248357	0.697888	-0.00800544	0.442805	-0.0121501	0.881328	0.00652343	0.821011	-0.00841118	0.784672	-0.00898302	0.863346	0.00669934	1	-0.00114487	1	-0.000851963	0.257407	0.0176444
LHX2	0	-0.645134	0	-0.435924	1.5039e-17	0.0920762	4.07471e-36	-0.134467	2.11335e-19	-0.0987717	2.80398e-12	-0.0785515	4.84416e-06	0.0539817	7.23132e-53	-0.163098	5.16425e-16	-0.089979	3.64998e-06	0.0536824
CLEC2G	7.95199e-09	-0.0641022	0.00301304	-0.0360564	0.295522	-0.0151453	0.69977	-0.0100806	0.900487	-0.0068272	0.234388	-0.0201753	0.000137653	0.046427	0.844847	0.00727345	4.2527e-05	-0.0495682	0.372817	0.0150024
GMPR	0.380953	-0.0134498	4.51984e-08	0.0615351	1.77905e-209	-0.317158	4.27124e-07	0.0583339	3.58063e-13	0.0811978	0.851939	-0.00756702	0.00013675	0.0464434	7.11485e-05	0.0482527	0.000894416	0.0418519	3.60194e-08	0.0626407
GLRA1	1.2527e-31	0.124993	6.75193e-08	-0.0607988	0.64146	0.0087267	0.140002	-0.022364	0.00116711	-0.0409339	7.294e-29	0.120894	3.52212e-07	0.0591125	0.570803	-0.0125377	0.0451536	0.0285814	0.051563	0.026187
MID2	1	-0.00203788	0.00508599	0.0343654	0.0314301	0.0265389	0.000490293	0.0426182	0.773187	0.00931372	0.776735	0.00913235	0.266268	-0.018962	0.204795	0.020748	0.56581	-0.0124195	0.97027	-0.00388845
TRIM25	2.89959e-28	-0.118062	0.0479467	0.0259553	0.00598665	-0.0326399	0.293262	0.0178601	0.0607106	0.0273237	0.168573	-0.0221325	0.181895	0.0214441	5.06166e-05	-0.0490302	1	-0.00156367	0.733278	-0.00844052
DGKE	0.953808	-0.00318947	0.300139	-0.0158776	0.07118	0.0229717	0.334525	0.0169296	0.331476	0.017757	1	-0.00168254	0.0585904	-0.0272607	0.648901	-0.0110787	0.879064	0.00606017	0.807475	-0.00714017
SCPEP1	0.649191	0.00840332	0.0498474	-0.0257909	0.793833	0.00616735	0.0002176	0.0447509	0.75054	-0.0097454	0.108571	-0.0245388	0.22407	0.0201061	1	0.00132862	1	0.00254386	0.650165	0.00991748
MNT	0.772902	0.00626776	0.000483463	-0.0413752	0.0258944	-0.0273114	0.496377	0.013691	0.432072	0.0156681	0.929377	-0.00574318	1	-0.000600513	1	0.00323131	0.916264	0.00520675	0.985945	0.00349881
ITGB2	0.415788	-0.0127359	1	-0.00118662	0.842792	0.0053075	1	0.00330678	1	0.00307319	0.909793	0.00622535	0.631774	-0.0112129	1	0.0025266	0.966277	0.00395329	1	-0.000725096
HDDC2	1	-0.00163182	4.08118e-09	0.0657443	4.51413e-25	0.110828	1	-0.0018648	1	-0.00359923	1	0.00327332	0.188933	0.0211946	0.2216	-0.0202674	0.168915	0.0219699	0.327537	-0.015982
TPD52L1	5.69948e-06	0.0514755	0.00113153	0.0389963	6.33467e-31	-0.123394	0.0636383	0.0262479	0.0716088	0.0265705	0.218029	-0.0206129	0.183945	0.0213724	1.61331e-21	0.104254	0.0641817	-0.0270244	1.246e-25	-0.113389
PEMT	0.0604052	-0.0242395	0.258775	-0.0169075	0.0206705	0.0281944	0.139121	-0.0224001	0.461935	0.0150735	0.798268	-0.00870054	0.791596	0.00811887	0.453492	-0.0148118	0.773176	-0.00824983	0.484732	-0.0128389
CDH1	0.405482	-0.0129399	0.530513	0.0110993	0.861186	-0.00497495	0.0886108	0.0247136	0.0772416	0.0262119	0.81995	-0.00824901	0.527954	0.0132198	1	0.00283551	0.00167721	-0.040058	1.42677e-07	0.0601002
CDH4	8.40319e-08	0.0598775	6.33746e-52	0.160594	0.00184047	0.0363809	0.000781219	0.041341	0.148518	0.0228591	1.69512e-07	-0.0609057	4.66195e-08	0.0628258	4.41441e-11	-0.0744158	0.000269033	0.0450741	1	0.00218917
CKMT1	0.185568	-0.0183797	1	0.00210508	1	0.000915048	0.920138	0.00568197	1	0.0011562	0.120549	-0.0239814	0.549345	0.012804	0.834036	-0.0075015	0.906987	0.00540376	0.110704	0.0225323
BCL6B	0.0957691	0.0220085	2.85322e-05	-0.0484588	0.0255024	0.0273751	0.0647245	0.0261697	0.24807	0.0197723	0.691656	-0.0107676	1	-0.000663054	0.323261	-0.0176732	0.675675	0.0102403	0.417126	0.0141167
CLEC10A	1		1		1		1		1		1		1		1		1		1
ALOX12	0.536041	-0.0104035	1	-0.00153265	0.0278685	-0.0270223	1	0.00262504	0.79802	-0.00886649	0.975745	0.00448895	0.963153	-0.00435632	0.942043	0.00504342	0.0447402	0.0286245	0.78084	-0.0075797
ARVCF	0.00597118	-0.0332089	7.78136e-17	0.0907998	2.83409e-32	-0.126106	0.140534	0.0223448	0.235907	0.0200865	1	0.00345303	0.930802	0.00513781	0.845164	-0.00726275	0.13671	-0.0232214	0.507152	0.0124343
COMT	1	-0.00162816	0.000672728	0.0404754	0.763122	0.00667987	1	-0.00341845	0.234625	0.0201319	1	-0.00107269	0.766358	-0.00863836	0.0442924	-0.0285415	0.215833	-0.020451	0.952605	-0.00434512
RTCA	4.54759e-06	-0.0519607	0.0136395	0.030984	3.49716e-13	0.07915	0.701184	0.0100524	0.958811	-0.0053805	0.959907	0.00496892	0.939562	0.00491666	1	6.78992e-05	0.317678	0.0176689	0.476435	-0.013002
DBT	2.0519e-10	-0.0701434	1	0.000392118	5.94204e-05	0.0455683	0.0022008	0.0383619	0.959927	-0.00532187	0.323984	0.0179534	1	0.00283732	0.0267819	-0.0306045	0.563707	-0.0124702	0.443115	0.0136099
DAZAP2	0.335701	0.0144211	6.06846e-06	-0.0518824	1.493e-08	0.0625286	0.0101097	0.0334551	1	0.000407919	0.330498	0.0178031	0.444637	0.0149261	0.257329	-0.0193038	0.909508	0.00535263	0.0965372	0.0232362
MCTS1	2.42101e-25	0.111661	0.490373	-0.0118921	2.23874e-06	0.0529368	0.000210556	-0.0448373	0.00926631	-0.0346221	0.354237	-0.0172726	0.0010631	0.0410657	0.00396944	-0.0372851	0.0394438	-0.0291572	0.000985003	0.0400056
REM1	1	-0.00209492	0.0717315	-0.0241242	0.571334	-0.00991001	0.851653	-0.00717015	0.663648	0.0113519	0.911622	0.00619189	1	-0.000458936	0.745374	0.0092073	0.359844	0.0167008	0.442986	0.0136129
RNF17	0.902918	-0.00407622	0.618556	0.00945545	0.358621	0.0137816	0.647584	-0.0110321	0.937654	0.00594497	0.999269	0.00387125	0.998619	-0.00342087	0.803595	-0.00807389	0.529199	-0.0131441	0.560057	0.011473
TRAPPC10	0.166239	-0.019026	0.321461	0.0153859	0.177782	0.0182719	0.790431	0.00841923	0.499982	0.0143884	0.915394	0.00612156	0.926448	0.00523318	0.983523	0.00399947	0.489583	0.0139211	0.257674	0.0176379
CCM2	0.0746202	-0.0232396	5.54144e-05	0.0468946	0.0100206	0.0308621	0.117847	0.023259	0.981459	0.00474575	0.115185	-0.0242384	1.58e-08	0.0647253	4.13361e-05	-0.0494978	0.538183	-0.0129651	0.737415	0.00835943
TBRG4	0.060618	-0.0242196	0.00939776	0.0322992	2.02617e-15	0.0860296	0.747945	-0.00922191	0.29859	-0.0185061	0.165028	0.0222554	0.873522	-0.00645675	0.289849	-0.0184781	0.885642	0.00587949	0.0555396	-0.0258611
TMPRSS2	0.0717463	0.0234347	0.253869	-0.0170391	0.859922	0.00499797	0.0407877	0.0281687	0.821146	-0.00840825	0.0789707	-0.0260998	0.89421	-0.00596156	1	0.00201782	0.490252	0.0139089	0.962857	-0.0040991
MX1	1		1		1		1		1		1		1		1		1		1
FAP	1		1		1		1		1		1		1		1		1		1
NDUFA9	0.211215	0.017569	0.0662679	0.0245069	0.0258069	0.0273245	0.147143	0.0220898	1	-0.00199705	0.9033	-0.00637942	0.000929168	0.0414306	0.902446	-0.00603875	0.314593	-0.0177556	0.929252	0.00484197
EGFL6	0.367996	0.0137179	0.00351334	0.0355712	0.977754	0.00270393	1	-0.00200305	0.660831	-0.0114035	0.53342	-0.0138172	0.000655366	0.0423825	0.133318	-0.0232462	0.529428	0.0131397	0.248847	-0.0178756
LCK	0.468996	0.0116718	0.288457	-0.0161524	0.000390433	0.0407825	0.9975	0.00374488	0.970736	-0.00503738	0.277691	0.0190329	0.167732	-0.0219368	1	-0.00145165	0.43488	0.0150079	1.0489e-16	0.091143
CTTNBP2	9.02415e-09	0.0638814	1.58598e-19	-0.0980069	0.000109306	0.0440765	8.73503e-50	0.157798	1.08199e-14	-0.0858339	9.27029e-08	0.0620226	0.970454	0.00419715	0.340693	-0.0172912	0.0125791	-0.033597	1.44626e-19	0.0988676
GALNT1	0.247938	-0.0165197	0.00551285	0.0340998	0.00288291	-0.0349962	0.327067	0.0171023	0.0134754	-0.0333027	1	0.00343013	0.772943	-0.00847198	0.921003	0.00561712	0.937533	-0.00471546	3.68565e-11	-0.0739516
MYF5	1		1		1		1		1		1		1		1		1		1
MKRN2	0.69976	0.00750347	0.0326467	0.0275884	0.000518953	0.0400116	1	0.00347496	0.166498	0.0222191	1	-0.00197042	0.654226	0.0108111	0.534144	-0.0132273	0.141459	0.0230231	0.0933089	-0.0234026
PPARG	0.95071	-0.00324123	0.851881	0.00517624	0.842103	0.00531846	1	-0.000320197	1	-0.00044463	1	-0.00329772	0.996157	0.00350101	0.84587	-0.00723308	1	0.00304246	0.976969	0.00374652
RAF1	0.081133	0.0228263	0.967534	0.00297347	0.625658	-0.0089837	0.883373	-0.00647666	0.81532	0.00854756	1	0.00298604	0.970914	0.00417825	1	0.00125794	0.995783	-0.00324212	1	0.00182569
SEPT1	0.0012419	-0.0381126	0.255032	-0.0170091	3.7639e-06	-0.0518338	1	0.00217607	0.354517	0.0172644	1	-0.00137278	1	8.35032e-05	1	-0.00327346	0.750579	-0.00869065	0.00944999	0.0328658
PDGFB	1	0.0017409	0.673224	-0.00844883	0.933157	0.00361098	0.738366	-0.00939557	1	0.000478565	1	-0.00311078	1	6.10785e-05	0.793291	-0.00830432	0.680341	-0.0101395	1	0.00242953
ACVRL1	1	0.00158117	0.936036	-0.00360551	0.563631	-0.0100343	0.693333	0.0102179	1	-0.00101534	0.761334	-0.00947086	0.49779	-0.0138475	0.911255	-0.00585149	0.783617	0.00804568	1	-0.00173343
GRASP	1.41563e-45	-0.15027	0.0836208	0.0233891	0.351279	0.0139321	2.83131e-14	0.0841703	0.0232331	0.0313128	2.38929e-06	0.0557485	2.91769e-06	-0.0550009	0.000439655	0.0436894	0.731742	0.00913517	0.0836891	-0.0239334
ACVR1B	0.360834	-0.0138701	0.380412	0.014079	0.140514	-0.0195695	1	-0.000920134	0.0493181	-0.0282368	1	-0.0024532	0.794053	0.00807072	1	-0.0024453	0.787384	-0.00797007	0.438474	0.0136952
TOM1L2	0.0178837	0.029298	0.577965	0.0101949	0.000563386	-0.0397828	0.982016	0.00416776	0.514257	0.0141052	0.681359	-0.0109838	0.523589	0.0132977	0.983683	-0.00399042	0.40434	-0.0157057	0.916003	0.00515821
GPA33	0.655177	0.00830193	0.833352	0.00551467	0.171157	-0.0184883	0.882436	-0.00649735	0.843144	0.00793562	0.784842	-0.0089788	0.664407	-0.0106045	0.667018	-0.0107471	0.413984	0.0154856	0.248543	0.0178862
ZFP385A	5.15469e-29	-0.119641	5.02498e-15	0.0856031	4.33793e-08	0.0606101	2.67624e-13	0.0811508	5.09603e-05	0.0489249	0.0653021	0.026991	0.36644	-0.0165544	0.667034	0.0107463	0.62222	-0.0113136	0.928998	-0.00484868
ITGA5	1.72268e-12	-0.0773083	4.77238e-05	0.047256	0.0521831	0.0243818	5.12006e-08	0.0622942	0.00106445	0.0411953	2.69714e-05	0.0505559	0.00532444	-0.036175	0.434061	0.0152014	0.83117	0.00709383	0.00154153	0.0386714
GABRA2	0.00759745	0.0323931	0.684868	0.00823538	4.33716e-06	-0.0515298	7.08611e-05	-0.0475103	0.0142232	-0.0331142	0.752978	-0.00964122	2.17524e-06	-0.0555893	0.000203474	0.0456745	0.746	-0.00881104	0.699124	0.00904311
WDR77	0.420498	-0.0126327	0.536811	0.0109711	1.37261e-26	0.114224	0.289857	-0.0179445	5.7124e-05	-0.0486471	2.00162e-07	0.0605986	0.609668	0.0116629	0.00382987	0.0374024	0.620647	0.0113479	8.37079e-17	-0.0914225
ADORA3	0.539114	-0.0103503	0.532614	0.0110547	0.362441	0.0137047	0.9235	0.00560408	0.99133	0.00448346	1	0.000855782	1	-0.00151206	0.409213	-0.0157311	0.807162	-0.0075923	0.907086	0.00535203
ATP5F1	0.000313986	0.0419562	8.60567e-06	0.0511319	0.000461088	0.040332	0.020969	0.0307928	0.832568	-0.00814537	0.692533	-0.0107455	0.15884	0.0222562	0.331121	0.0175037	0.857571	0.00650801	1	0.00163829
SOX9	2.89114e-136	-0.257964	1.70146e-06	-0.0545512	5.21804e-30	0.121513	1	0.00236726	1	0.00220093	5.69699e-57	0.169433	1.41613e-30	-0.123986	6.74417e-12	-0.0771663	3.93366e-32	0.127633	7.61443e-26	0.113863
HNRNPD	0.72506	-0.00709441	5.37572e-07	0.0568572	4.16339e-36	0.133507	0.00913306	-0.0338099	0.00508251	-0.0365616	0.162661	0.0223364	0.632855	-0.0111962	0.65555	0.0109425	1.6331e-05	0.0517082	2.57723e-08	-0.063236
DYNLT1C	0.666716	-0.00808387	0.00365688	0.0354367	1.86497e-13	-0.0800227	0.616218	0.011583	0.175059	0.0219568	1	-0.00228474	0.342547	-0.0170962	0.630043	-0.0114458	1	-0.00174016	2.34791e-06	0.0546167
C1D	0.583667	0.00955185	0.18803	-0.0189608	0.0513526	0.0244552	0.802346	0.00820385	0.756664	0.00960637	1	-0.00150753	0.310385	-0.0178633	0.844138	-0.00729469	0.73507	0.00903475	0.0548048	0.0259216
GM2A	0.230285	0.0170117	0.663526	-0.00863625	0.00317669	-0.0346917	0.532272	0.0130348	0.0338705	0.0297983	0.548613	-0.0135287	0.0080373	-0.0348531	1	-0.00230897	1	0.00108237	1	0.00172934
KRIT1	0.00146431	0.0376232	0.331365	-0.0151565	0.32891	-0.0144086	0.223689	-0.0196378	0.857851	-0.00767532	0.00779262	-0.0352491	0.78067	0.00833547	0.621054	-0.0115936	0.891559	-0.0057517	0.56326	0.0114175
CLCN4	0.0553941	0.0246429	0.00401823	0.0351344	0.00519878	-0.0331069	1	-0.000842675	0.347682	-0.0174222	0.908783	-0.00625548	0.180011	0.0215197	0.0482512	-0.0281829	0.504982	-0.0136106	0.00510818	0.0349454
GRM6	0.37783	-0.0135141	0.99769	0.0023792	0.728426	0.00731133	1	0.0022862	1	0.0022014	1	0.000683826	1	0.00185926	1	0.00255108	0.643125	-0.0109178	0.713957	0.00878063
SEMA4F	3.34179e-131	0.253269	6.652e-118	-0.240575	2.63529e-07	0.0572306	1.85297e-24	0.110614	1.18655e-262	0.353588	1.62259e-64	-0.180219	0.000122867	-0.0467118	0.790267	-0.00836163	0.000721676	-0.0424538	1.22143e-63	-0.178347
HK2	0.225077	0.0171536	0.774696	0.0065884	5.52306e-65	0.179321	0.000327964	-0.0436876	4.65076e-08	-0.0629703	0.40812	0.0161444	0.159233	0.0222422	0.77277	0.00867991	0.00957174	0.0345693	3.01253e-34	-0.131123
MYO18A	5.91637e-08	0.060529	1	0.000115872	0.0029148	-0.0349623	0.003755	0.0367145	2.934e-06	0.0550977	0.927743	0.00578364	0.0122621	-0.0334208	0.0960108	0.0249869	0.0208294	-0.0317253	6.45299e-06	0.0524647
SEZ6	4.5555e-11	-0.0724796	0.000149624	-0.0444549	0.00330158	0.0345693	1	0.00345297	0.545594	0.0134849	1	-0.000570815	1.27461e-05	0.0518908	1	0.0012022	1.66637e-09	-0.0688855	6.9229e-08	0.0614463
HAAO	0.836474	-0.00519987	0.885465	0.00456394	0.850341	0.00515541	0.968226	0.00451134	1	0.00377495	0.978131	0.00442996	0.906114	-0.00568745	1	0.0014559	1	-8.16567e-05	1	-0.000930634
CD52	0.645647	-0.00847703	1	0.00151117	0.751726	0.0068865	1	0.000794813	1	0.000703267	1	3.60023e-05	1	0.000248086	0.918068	-0.00568604	0.811001	-0.0075026	0.776636	0.00765399
ABHD15	0.893619	0.00423613	0.438312	-0.0128997	0.72191	-0.00742011	0.14139	-0.0223159	0.562392	0.0131655	0.217864	-0.0206172	0.984426	0.00382409	0.843651	-0.00730319	0.391462	0.0159716	0.689078	-0.00923437
HOXB6	0.717259	-0.00721728	0.854014	-0.00513884	1	-0.000981109	1	-0.00151303	1	-0.00111627	1	-0.00211059	0.933729	0.00507901	0.995675	0.00368259	1	-0.00205927	1	-1.66661e-05
LOXL3	7.95305e-06	0.0507589	0.529972	-0.0111127	0.807455	-0.00593672	0.00119221	0.0401423	1	0.00415137	1	-0.0035965	0.447943	-0.0148631	0.423614	-0.0154087	0.987039	0.00346157	1.25506e-19	0.0990241
BTN1A1	1	0.000824555	0.629392	0.0092591	0.912534	0.00401702	1	3.56592e-05	1	-0.000524258	0.995604	-0.00395435	0.975	0.00408555	0.817776	-0.00779662	0.834392	0.00702654	1	-0.00160602
KAT2B	0.961147	0.00305345	0.121343	0.0214625	2.02884e-08	-0.0619797	0.380414	0.015961	1	0.000980458	0.0537111	0.0278713	0.0628684	-0.0269346	1	-0.000977452	0.507855	-0.0135481	0.989753	-0.00341758
RAB5B	0.0423961	0.0258126	0.87461	0.00475986	0.00882282	-0.0313096	0.967075	-0.00454589	1	-0.00245378	0.531401	-0.0138586	0.0184075	-0.0319445	1	-4.63725e-05	0.75465	-0.00861167	0.00126235	0.0392815
CRYBA1	9.08412e-64	-0.177673	0.0041764	-0.0350096	1.79809e-05	-0.0483814	0.00750039	0.0344547	0.236231	0.0200776	0.292187	0.0186764	1	0.00217234	1.17149e-24	0.111616	0.00487555	0.0367863	0.45509	-0.013393
DNMT3L	0.0064818	-0.0329331	0.523986	-0.0112373	0.333395	0.0143125	1	0.000423881	0.997819	0.00427254	0.463371	0.0151154	0.727323	-0.00941324	0.48422	-0.0142045	1	0.00253465	1	0.00299655
AIRE	1	-0.00208984	0.654903	0.0087843	0.740273	0.00710005	0.721964	-0.00969216	1	0.00203133	0.648652	-0.0116408	0.985629	-0.0037718	0.965715	0.00445479	1	-0.00140475	0.889261	-0.005693
ICOSL	0.419698	0.0126514	1.56098e-06	0.0547277	0.0362996	-0.0259427	0.006734	0.0348074	0.727511	0.010218	1	0.000544979	0.724037	-0.00946974	0.84587	-0.00722877	0.756735	-0.00857194	0.587344	-0.0110028
SPG7	0.0141729	0.0301688	0.547513	0.0107536	1.22315e-05	-0.0492548	0.807954	0.00808903	1	-0.00145478	0.954023	-0.00512819	0.733474	-0.00930426	0.756221	0.00900631	0.545748	-0.0128047	0.567211	0.011341
SULT5A1	0.871679	0.00461574	1.59495e-10	-0.0710059	0.311757	0.0147741	0.305522	0.0175789	3.96077e-22	0.105528	0.524729	-0.0139748	0.3221	-0.0175876	1	-0.000503573	0.795912	0.00780892	1	-0.00188383
RPL13	0.0182587	0.0292153	0.393951	-0.0137924	3.62219e-12	-0.0758248	0.952937	-0.00486265	0.773891	0.00930148	0.782925	-0.0090079	0.509959	0.0135819	1	7.47233e-05	0.998717	-0.00315915	0.888605	0.00570285
CHMP1A	0.849297	0.00498833	0.971586	0.00288024	0.0725781	0.0228791	0.693333	0.0102158	1	0.00132188	1	0.00226099	0.866748	-0.00662711	1	-0.00220902	1	-0.0028007	0.0402454	0.0272722
RPA1	3.18029e-05	-0.0476421	0.497837	0.011739	5.82892e-21	0.101009	0.18402	-0.0208128	0.120252	-0.0240044	0.304375	-0.0183861	1	1.19234e-05	0.176409	-0.0216547	0.0362359	0.0295349	0.753851	-0.00805225
SERPINF1	0.0314847	-0.0270676	0.819323	0.00578752	0.836175	-0.00542909	0.545962	0.0127814	0.851693	0.00777562	0.358037	-0.0171992	0.984139	0.00386506	0.468151	-0.014513	0.984967	0.00351546	0.122697	0.0219882
TUBGCP3	0.000720331	0.0396878	0.760005	0.00685434	0.57937	0.00976817	0.0502276	-0.0272832	0.952597	0.00556255	1	-0.00240759	0.331245	0.017365	0.509225	-0.0136959	0.896083	-0.00565964	0.876918	-0.00591321
POLR3D	1	-0.00231824	0.0769668	0.023792	8.80577e-15	0.0841302	3.48286e-05	-0.0491549	1	0.00216301	0.00480898	0.0368512	0.602178	0.0118092	1	0.00236041	0.355663	0.0167908	2.91296e-07	-0.0587495
TCF7	0.0158071	0.0297665	7.48103e-25	0.110861	2.64134e-33	0.128141	2.08932e-09	0.0677741	3.25101e-07	0.0594317	7.10805e-05	0.0483077	0.466706	0.0144817	0.00193039	-0.0395025	0.103909	0.0246736	0.000300174	0.0432837
DDX3X	0.15594	0.0193985	0.0208015	-0.0293844	1.45549e-08	0.0625749	0.426145	-0.0150373	1	0.00248718	1	-0.00127716	0.281838	-0.0185674	0.589132	0.0121889	1	0.00238219	0.541218	-0.01181
IL12RB1	0.0894743	-0.0223429	0.16559	-0.0197325	0.378044	0.0133987	0.775404	0.00870774	0.718763	-0.0103614	0.432212	0.0156863	0.364484	-0.016595	0.716821	-0.00974568	0.3127	0.0178136	0.364541	-0.0151773
SLC5A5	1	-0.00035794	0.704601	0.00787717	0.483908	-0.0114221	1	-0.00222596	1	0.00140018	1	0.00108568	0.969493	0.00421946	1	0.00228957	0.837762	0.00693111	0.237711	-0.0181625
KCNN3	0.326594	0.0146218	0.775907	-0.00656202	0.669908	-0.00826558	1	0.00170657	1	-0.00334388	1	0.00279833	0.0106111	-0.0339207	0.498528	-0.0139127	0.226786	-0.0201113	0.224904	0.018503
USP32	0.00121233	-0.0381837	0.882173	-0.00462656	0.00246831	-0.0354837	1	-0.000934304	0.0210892	0.0316811	0.0220878	-0.0314827	0.67231	-0.0104511	0.803618	0.00806789	0.423467	-0.0152768	1	-0.000651007
CAR4	9.41954e-192	-0.304029	8.034e-151	0.271074	5.55085e-134	-0.255908	7.02587e-95	0.216805	6.48065e-136	0.258473	0.000876411	0.0418787	1.67757e-09	-0.0684954	3.78308e-39	-0.14054	0.255092	0.0193129	4.25978e-37	0.136464
TXNRD3	0.000492859	0.0407404	8.06295e-12	0.0755028	2.4771e-06	0.052722	0.00311269	0.037309	0.962172	-0.00523399	0.937816	0.00550561	0.898377	0.00585931	0.0200973	-0.0316883	1	0.000324432	0.000221024	-0.0440844
FASL	1	0.000389352	0.256288	0.0169772	0.78453	0.00632339	0.726658	0.00959755	0.86001	0.00762666	1	0.00373317	1	0.00272818	0.959003	0.00462778	0.627365	-0.0112128	1	-0.00198049
ZFP512B	0.474108	0.0115666	0.431386	-0.0130342	0.146528	-0.0193444	0.0543159	-0.0269443	0.283475	-0.0188662	0.436404	-0.0156092	0.738578	-0.00918223	0.966302	0.00442985	0.170911	-0.0218978	1	0.00218378
DNAJC5	0.933212	0.00355622	0.787859	-0.00634688	1	-6.93817e-05	0.944958	-0.00508722	0.97797	0.00484948	0.751085	0.00967108	0.518002	-0.0134132	0.829291	-0.00758233	1	0.00220866	1	-0.00242828
TPD52L2	0.0034977	0.0349492	0.958724	-0.0031443	0.983687	-0.00258157	0.559044	-0.0125545	0.818552	-0.00848006	1	0.000732249	0.708188	-0.00977486	0.154464	0.0224149	0.984579	0.00352731	0.626348	-0.0103036
FMR1	1.36945e-09	0.0670782	0.210565	-0.0182708	0.032252	0.0264337	0.0452993	-0.0277248	0.970303	-0.00505015	1	-0.00086872	0.971896	-0.00416132	1	-0.000288379	0.993165	-0.00330133	0.561	0.0114577
BCL11A	0.0355111	-0.0265701	0.00349219	0.03559	0.0322143	0.0264389	0.120394	0.0231433	0.691096	0.010866	0.962696	-0.00488633	0.37394	0.0163952	0.746521	-0.00917944	0.513721	-0.0134401	0.94056	0.00458499
PXMP4	0.04813	0.0252656	0.000516038	0.0411987	1	0.00151805	0.604378	0.0117974	0.0597281	0.0273963	0.518188	-0.0141026	0.660369	-0.0107047	1	-0.00287551	0.239399	-0.0197473	9.22625e-05	0.0463115
DLG3	1.3318e-07	-0.0590149	5.78235e-09	-0.0651473	0.0863391	-0.0220529	0.0397806	-0.0282798	0.956338	0.0054457	0.733579	0.0100128	0.381214	0.0162384	0.434003	-0.015211	1	-0.000432644	0.0307315	0.0283834
GNB1L	0.491491	-0.0112219	0.954777	0.00321706	0.00056315	0.0397843	0.923907	0.0055969	0.282001	-0.0188997	0.404909	0.0162132	0.914564	0.00550588	0.440819	-0.0150553	0.513721	0.0134408	0.388275	-0.0146736
MMP11	3.51964e-14	-0.0826756	0.385496	-0.0139718	4.14961e-42	-0.144311	0.149509	0.0219966	0.0926513	0.0253424	1	0.00162513	1	0.00300511	0.99002	-0.00384053	0.237079	-0.0198067	5.80268e-10	0.0696476
SMARCB1	1	0.000295181	0.00208337	0.0372027	0.146641	0.0193393	0.109295	0.0236516	0.799115	0.00884728	1	-0.00235847	0.836752	-0.00720307	1	-0.00294384	0.751114	-0.0086808	0.0662913	0.0250551
VPREB3	1	-0.00199142	0.508881	0.0115197	0.807543	0.00593299	1	0.00170425	1	0.00100636	0.983572	-0.00424522	0.865175	0.0066719	0.91565	-0.00575685	0.949497	0.00441764	1	-0.00176239
HIP1R	0.966478	0.00294929	2.36194e-07	-0.0584434	0.42992	0.0123841	0.695462	-0.0101756	0.00132225	0.0405748	0.24848	-0.0197771	0.723251	-0.00948682	0.230694	-0.0200098	0.756774	0.00856617	0.00172662	0.0383422
NSUN5	0.779824	0.00614518	0.407276	0.0135229	5.57014e-08	0.0601566	0.846333	0.00727881	1	0.000109779	0.834485	0.00794363	1	-0.00117071	0.139631	-0.0229845	0.205331	0.020754	0.0299204	-0.0284959
TOP1MT	9.44422e-38	0.136699	3.57608e-22	-0.104594	0.127162	0.0201033	0.220647	0.0197168	0.606566	-0.0123604	0.632721	-0.0119504	1	-0.00129363	0.276859	0.0188153	1	0.00147739	1.48266e-13	-0.0818347
HOXA10	1	0.00168868	0.130977	0.0210519	0.901763	0.00423867	0.715582	0.00981407	0.863318	0.00755933	1	0.000988118	0.798512	0.00798885	1	0.00272121	0.737142	-0.00898472	0.737768	-0.00834702
HOXA4	6.46844e-06	0.0512013	1.73111e-06	-0.0545144	0.729805	0.00728751	1.25256e-19	0.098958	9.1814e-06	-0.0527233	0.752746	-0.00964622	1	-0.00239693	1	-0.000621995	1	-0.00114866	0.291568	-0.0167999
GM38393	2.525e-21	-0.102198	3.15478e-14	-0.083197	2.87078e-12	-0.0761644	0.000788867	-0.0413131	0.93759	0.00594737	0.0484838	-0.0283188	0.113754	0.0240885	0.00392613	0.0373201	2.71288e-10	-0.0718016	0.667623	-0.00962169
MMP14	6.35189e-05	0.0459978	5.21226e-16	-0.0884696	2.44219e-84	-0.204061	7.87012e-45	0.149794	0.0144072	-0.0330636	0.323698	-0.0179626	0.000122145	0.0467296	0.253395	-0.0194107	1.40968e-06	-0.0567964	8.52512e-21	0.102006
SLC7A7	4.167e-08	0.0611674	8.28792e-08	-0.0604227	0.020606	-0.0282097	2.48805e-45	0.150627	3.96697e-15	-0.0871193	1.71445e-07	-0.0608836	1	-0.00174232	0.922101	0.00559518	0.00812062	-0.0351298	0.345726	-0.015583
OXA1L	0.817758	-0.00551166	1	0.000939732	1.62717e-05	-0.0486071	1	-0.00258667	0.796545	-0.00889134	0.217588	-0.0206292	0.45091	0.0148031	0.339413	-0.0173239	0.589796	-0.01194	0.411057	0.0142319
HEATR6	0.968432	0.002915	0.392091	-0.0138313	0.214471	-0.017176	0.710483	-0.00990003	0.902314	-0.00679027	0.042541	-0.0288705	1	-0.00222977	0.241614	-0.0197176	0.367048	-0.0165281	0.256866	-0.0176578
ICAM4	0.814832	-0.00555818	0.87321	-0.00478162	0.646971	0.00863696	0.968722	0.00450044	0.857245	0.00768299	0.956564	0.00506806	1	0.00136148	1	0.00180232	0.667586	0.0104235	0.940047	0.00459254
ILF2	0.0362391	0.0264891	1.22542e-07	0.0596968	2.66312e-06	0.0525705	0.026233	-0.0299437	1	0.00350554	0.0346118	0.0297167	1	-0.00128961	0.136699	0.0231143	0.0060726	0.0360867	0.114664	-0.0223371
CHTOP	0.993079	0.0024661	0.333549	0.0151072	6.61272e-08	0.0598425	0.744173	-0.00929088	0.441769	0.0154672	0.368894	0.0169496	0.534597	-0.0130818	1	-0.000204622	0.861028	0.00643234	0.000182661	-0.0445866
SNAPIN	0.0256136	0.0278887	1	-0.000199528	0.0342374	-0.0261855	0.949224	-0.00496477	0.578939	0.012857	0.397075	0.0163614	0.710452	-0.00973119	0.843002	-0.00731595	0.872855	0.0061797	0.254359	0.0177186
S100A4	1		1		1		1		1		1		1		1		1		1
S100A3	0.908212	0.0039755	0.96172	0.00309024	1	0.00174869	0.83658	-0.00752849	1	0.00252209	1	0.00362234	0.924914	-0.00528364	1	-0.00256947	0.484062	0.0140417	0.249313	-0.017858
S100A5	1		1		1		1		1		1		1		1		1		1
S100A6	0.0841346	-0.0226478	0.000706588	0.0403383	3.07097e-59	-0.171249	1.12638e-08	0.0649464	9.75087e-08	0.0616386	0.00670828	0.0357597	4.32812e-09	-0.0669417	0.600314	0.0119717	0.352813	-0.016853	0.00101051	0.0399281
SCN4A	1	0.00152745	0.265996	0.0167095	0.421969	0.0125435	1	0.00358474	1	0.00366068	0.988857	0.00411667	0.767285	-0.00861401	1	0.000906382	0.904751	0.00545731	0.291205	0.0168088
ICAM2	0.733625	-0.00695648	0.969488	-0.0029243	0.114897	-0.0206302	0.864358	0.00689642	1	-0.000633093	1	0.00285742	0.8774	-0.00636821	1	0.0031173	1	-0.000169912	0.970544	-0.00388179
MAPK7	0.231012	0.0169913	1	0.000961229	0.96973	0.00288062	0.578929	-0.0122214	0.0384346	-0.0292737	0.438184	0.0155783	0.287736	-0.0184248	1	-0.00279405	0.971184	0.00383816	0.222339	-0.018574
EPN2	0.429751	0.0124416	0.0399718	-0.0267447	0.531401	0.0105815	0.796568	0.00831509	0.767076	0.00940983	0.0877786	0.0255862	0.0242723	-0.0309276	0.811654	0.00791226	0.796686	0.00779398	0.273714	-0.0172438
B9D1	3.57145e-12	-0.0762678	4.87314e-09	0.0654413	0.0238992	-0.027628	2.88587e-06	0.0545451	0.429116	0.0157364	0.365006	0.0170345	0.0532782	0.0276957	0.409361	-0.0157246	0.791078	0.00788947	0.0006019	0.0414048
SEC24B	0.254857	-0.0163378	0.940122	0.00353099	0.594149	0.00951314	0.879859	0.00654809	0.995216	-0.00436686	0.552584	0.013465	0.264294	-0.0190097	1	-0.000980782	0.208123	0.0206744	0.308719	0.0164079
N4BP3	1.96074e-38	0.137935	0.00119955	0.0388299	7.6971e-23	-0.105612	8.48274e-13	0.0795669	4.62281e-15	0.0869275	0.0640827	-0.0270679	0.63304	0.0111916	2.16434e-05	-0.0509615	0.0172064	-0.0324399	4.27655e-09	-0.0663402
RMND5B	0.138292	-0.0200617	0.623921	0.00935598	0.000702727	-0.0391771	0.966571	-0.00456161	1	0.00409888	1	-0.00104712	0.114778	0.0240414	0.939225	-0.00511575	0.230076	-0.0200102	0.480037	0.0129321
NHP2	4.01552e-09	-0.0652793	0.0686621	-0.0243331	1.8056e-147	0.268063	0.364762	-0.0162806	0.0442272	-0.0286943	3.56622e-09	0.0676635	0.984426	-0.00382365	0.0276711	0.0304725	1.66501e-09	0.0688893	1.73474e-36	-0.135346
VPS9D1	0.000618274	0.0401181	0.550575	0.0106919	0.412545	-0.0127198	1	-0.00202335	0.0429985	0.0288087	0.265302	-0.0193549	0.0668267	-0.0266647	0.942723	-0.00502689	0.971665	0.00382443	0.846821	0.00645045
ZFP276	0.211717	0.0175519	1	-0.00200722	0.113769	-0.0206795	0.362738	0.0163238	0.954061	0.00552718	0.738775	0.00991339	0.270258	-0.0188664	0.0496309	-0.0280603	0.708955	-0.00960578	1	0.000515366
C1QL4	0.461576	-0.0118028	0.927912	-0.00376277	0.666963	0.00831371	1	0.000632511	1	0.000796967	0.986595	0.00416954	0.620745	-0.0114608	0.45284	-0.0148222	0.758679	-0.00853074	0.409008	0.0142707
MFSD10	0.00286419	-0.0355839	1.15735e-06	-0.0553325	0.660983	-0.00841872	0.111632	0.0235443	0.903956	0.00674535	0.234205	0.0201806	0.763666	-0.00869528	1	2.64745e-05	0.536361	0.0129945	1	0.00203037
LUZP1	0.000126384	0.044306	0.613342	0.00955508	0.000437976	-0.0404719	0.785374	0.00851119	0.662165	-0.011383	0.773228	0.00921793	0.769685	0.00856013	0.884962	-0.00643546	0.00195706	0.0396066	0.677634	0.00944685
KCTD10	0.617876	-0.00895243	0.817437	0.00581965	0.00109151	-0.0379271	0.095444	0.0243405	0.248226	-0.0197676	0.118823	0.024057	0.63974	-0.0110829	0.213931	-0.0204861	0.356287	-0.0167786	0.383364	0.0147835
POLDIP2	0.116073	-0.0210169	0.782922	0.00642936	1	-0.000541755	0.205429	0.020151	0.0439074	-0.0287243	1	-0.00345086	0.362231	0.0166463	0.769823	-0.00874097	0.740678	0.00892029	2.82607e-05	-0.0491566
IFT20	0.80044	0.0057923	0.00131869	0.0385529	0.0981036	0.0214295	0.000384329	0.0432794	0.803975	0.00875632	0.382069	-0.0166852	0.360775	-0.0166742	0.0727191	-0.0263448	0.434415	-0.0150199	3.51377e-06	0.0537628
COL6A1	0.0178842	-0.0292974	0.446588	0.0127363	6.53392e-13	-0.078271	0.319835	0.0172564	0.222485	0.0204953	1	-0.00342411	0.837178	-0.00719329	0.75381	-0.00904494	0.790574	0.00790083	0.725772	0.00856299
PCBP3	0.00218481	0.0364234	4.7432e-36	0.133797	6.24921e-05	0.0454446	0.965573	0.0045888	0.180032	-0.0217737	0.000289363	-0.0448326	8.35686e-05	0.0476274	2.54145e-07	-0.059994	0.000599611	0.0429582	0.00013836	-0.0452934
LGALS9	1		1		1		1		1		1		1		1		1		1
ARAF	0.406989	-0.0129041	0.365097	-0.0144036	0.0202402	-0.0282792	0.62753	0.0113881	0.180032	0.0217744	0.886169	-0.0068467	0.00177919	-0.0395697	0.932498	-0.0052827	0.139237	-0.023111	0.00756443	0.0336367
CFP	1	0.000919239	0.411571	0.0134316	0.014651	-0.0294918	0.914055	-0.00582462	0.252897	0.0196451	0.889303	-0.00674296	0.0636816	-0.0268797	0.163702	-0.0220895	0.861708	-0.00642115	0.588513	0.0109796
TIMP1	0.000104563	-0.0447858	0.304952	-0.0157633	0.227459	0.0168197	1	0.000943766	0.0874966	0.0256085	0.186971	0.021547	0.00392081	-0.0371693	2.95766e-06	0.055198	0.532991	0.0130622	1	-0.00143008
UXT	7.41358e-07	-0.0556881	0.51996	0.0113115	3.95108e-16	0.0880849	0.656748	-0.0108779	0.971747	0.00498759	0.327117	0.0178759	0.857867	0.00680278	0.859224	-0.00696409	0.615697	0.0114392	0.333126	0.015862
CNNM3	0.618734	-0.00893645	0.719983	-0.00758423	1	-0.00137305	0.707521	0.00994865	0.72747	-0.0102227	0.974194	0.00451806	0.53034	-0.0131676	0.551537	-0.0128855	1	-0.00230226	0.420681	-0.0140443
LMAN2L	0.600756	-0.00924964	0.0501693	-0.0257611	0.00908832	-0.0312035	0.995196	-0.00383208	0.0447907	0.0286398	0.900241	-0.00645832	0.602937	-0.011797	0.794408	-0.00827549	0.725977	-0.00926275	0.312147	0.0163333
MCM3AP	0.634604	0.00866433	0.607016	0.00966887	0.88154	-0.0046	0.461733	-0.0143251	1	0.0035624	0.933277	-0.00563697	1	0.00293371	0.574591	-0.0124567	0.693761	0.00990241	0.432535	-0.0138091
PCNT	7.46439e-09	0.0642147	0.106622	-0.0221498	3.33507e-16	-0.088294	0.212928	0.0199308	0.689852	-0.0108841	0.144715	0.0229994	1	-0.00127396	0.0140853	0.0329688	0.000623372	-0.0428526	3.94115e-10	0.0702783
FTCD	0.0576511	-0.0244586	0.751804	-0.00700359	0.434528	-0.0123009	1	0.00323212	0.665398	0.0113106	1	0.00303039	0.987409	0.00371744	0.927708	-0.00544432	0.563818	-0.0124676	0.826369	0.0068175
MXD1	0.0954006	-0.0220277	0.628275	-0.00927496	0.0626566	-0.0235572	0.996487	0.00378302	0.740644	-0.00996046	1	-0.000341371	0.87465	0.00642785	0.845454	0.00725525	0.266149	-0.0190089	0.208459	0.0189626
GMCL1	0.0708867	0.0234915	0.298831	0.0159111	0.988232	0.00248357	0.214192	0.0198994	1	-0.00175628	0.547482	-0.0135522	0.856747	0.0068202	0.515224	-0.0135819	0.659561	0.0105854	1	-9.06242e-05
SNRNP27	0.94697	0.00330635	0.0214087	0.0292762	0.101868	0.0212422	1	-0.000598397	1	-0.000826596	0.000874002	0.0418871	0.442538	-0.0149599	0.419452	0.0155232	0.562623	0.0124898	0.330688	0.0159214
OAS1C	0.530083	-0.0105223	0.898231	0.00431542	0.111499	0.0207857	0.717961	0.009764	0.876653	0.00727058	1	-0.00322458	0.343694	0.0170627	0.869076	0.00674663	1	0.00262343	0.118194	0.022179
OCRL	0.360838	-0.013869	0.746796	0.0071042	2.54969e-05	-0.04758	1	0.000867107	0.0359195	0.0295528	0.463378	-0.0151121	0.376664	-0.0163311	0.895664	-0.00620156	0.962608	0.00404517	1	0.000190893
CALM1	1.31204e-36	-0.134596	2.56592e-19	0.097467	0.86078	0.00498343	7.99722e-91	0.212211	0.572214	0.0129812	5.32889e-11	0.0742709	1	0.00307779	0.00901858	-0.0345479	0.210428	0.0206024	4.0574e-10	0.0702296
AGPAT3	0.936416	0.0034903	0.32082	0.0154031	0.69172	-0.00791423	1.50858e-16	0.0907368	0.00774083	-0.0352202	0.570571	0.0131179	0.269572	-0.0188827	0.921238	0.00560874	1	-0.000161053	0.194037	-0.0193951
SLC26A3	1	0.00206341	0.0475896	0.0259872	1	-0.0010744	0.574384	0.0122938	0.758107	0.00956072	1	0.00110669	0.72913	0.00937564	1	0.000740184	0.649457	-0.0107982	0.826787	-0.00680863
SEMA6B	7.00386e-11	-0.0718177	0.0993646	-0.0225213	0.514315	0.010894	1	0.00322262	0.919425	0.00638171	0.39623	0.0163791	0.400159	-0.0158274	0.381189	0.0163448	0.810506	-0.00751674	1	0.000593065
UHRF1	0.49215	-0.0112074	2.61402e-08	0.0625128	1.97824e-65	0.179937	0.439274	0.0147632	0.430136	0.0157108	1	9.28444e-05	0.151681	0.0225189	1	0.000520581	0.000690331	0.0425704	9.07333e-06	-0.0517251
DPP9	0.040199	-0.02604	0.14887	0.0203494	0.00166504	0.0366817	0.304324	0.0176054	0.816342	0.00852339	1	0.00238631	1	-0.00125865	0.677501	-0.0105452	0.841099	0.00685884	1	0.0030674
RAMP2	4.21088e-06	-0.0521222	8.38695e-07	0.0559748	0	-0.404963	2.15164e-23	0.108136	1.39557e-08	0.0650756	0.0268804	0.0307144	0.000268729	-0.0447611	6.86332e-15	0.0865378	0.000572731	0.0430805	2.82144e-54	-0.164884
LSR	2.74615e-46	-0.151445	1	0.000328176	2.98469e-09	-0.0653215	0.00035967	0.0434528	0.0293968	-0.0303767	0.132605	-0.023466	1	-0.0031652	0.676019	-0.0105782	1	-0.000428123	0.0473616	0.0265532
GRAMD1A	0.37591	0.0135533	0.12332	0.0213804	0.00719604	-0.032015	0.926601	-0.00553075	0.258082	0.0194961	1	0.00247486	0.040326	-0.0288831	0.836716	-0.00743708	0.57806	-0.0121629	0.484412	-0.0128492
HPN	0.000240081	-0.0426598	0.063032	-0.0247405	0.499496	0.0111503	0.803187	-0.00818967	0.658111	0.0114587	0.841568	-0.00779313	0.821996	-0.00750244	0.129648	-0.0234163	0.0259572	-0.030859	0.453179	0.0134328
GABRG1	7.95057e-12	0.0750923	9.63103e-17	0.0905393	7.21287e-06	-0.0504293	3.10967e-17	0.0926317	0.139591	-0.0232036	0.67294	-0.0111524	1.16651e-07	0.061173	3.78344e-07	-0.0592271	0.321975	-0.0175546	2.89042e-05	-0.0491064
CKB	2.30363e-13	0.0801295	2.17519e-22	0.105113	0	-0.43143	1.65447e-11	0.0753222	1.462e-66	0.182423	1	0.00101305	9.09437e-11	-0.0730925	2.08254e-10	-0.0720468	1.3006e-08	-0.0654486	0.00859712	-0.0331997
SP1	0.662065	-0.00818303	1	-0.00144919	0.00113128	0.0378221	0.570929	-0.0123519	0.0233919	0.0312824	0.680404	-0.0110072	0.0233893	0.0310621	0.251112	-0.0194763	0.719893	-0.00938407	0.948794	-0.00443041
ITGB7	0.389542	-0.0132748	0.940016	0.00353336	1	0.00119354	0.245611	0.019052	0.927936	0.00618696	1	-0.00288355	1	-0.00195867	0.329173	0.0175541	1	0.00307984	0.833681	0.00669073
MYG1	0.879447	0.00449004	0.310169	-0.0156471	0.011678	0.0303184	0.684628	-0.0103663	1	-0.00190724	0.92992	-0.00572621	0.0231307	0.0311036	0.567529	-0.0125952	1	0.00165671	0.21999	-0.0186412
RARG	2.83711e-30	-0.122247	2.47347e-24	-0.109671	7.26577e-14	-0.0813142	0.108424	0.0236931	0.748383	0.00978817	0.533257	-0.0138243	0.938732	0.00494795	1.07504e-10	0.0730673	0.0862949	-0.0256132	0.847701	-0.00643415
PFDN5	3.78997e-09	0.0653771	0.0467648	0.026069	1.74004e-06	-0.053458	0.0686753	0.0258944	3.23348e-05	0.0499469	0.00697928	-0.0356246	0.0596269	0.0271758	0.106726	-0.0244384	1	0.000796969	0.136766	0.021405
EFNB2	0.000110443	0.0446422	1.42088e-121	-0.244182	0.00918862	-0.0311645	6.12723e-234	-0.334504	8.78523e-72	-0.189311	1.40266e-24	-0.111569	1	0.000996914	7.58491e-26	-0.114265	1.25395e-06	0.0570397	1.01279e-27	0.117934
RRP15	1.44545e-11	-0.0742101	4.06575e-07	-0.0573982	4.74819e-35	0.131512	0.0419622	-0.0280446	0.25474	-0.0195849	2.0006e-05	0.0512348	0.817482	0.00761515	0.831051	-0.00755123	1.30097e-05	0.0522266	3.24225e-28	-0.118995
RND2	7.92419e-06	0.0507671	4.35581e-34	-0.13007	0.632918	-0.00886647	2.37236e-35	0.133046	5.34101e-17	0.0923977	0.00580693	-0.0362394	0.0188749	-0.0318528	3.25704e-05	0.050039	0.0182318	-0.0322346	2.48443e-16	-0.0900848
SRR	0.0215711	0.0285692	0.0249785	0.0286726	0.163049	-0.0187532	0.326989	0.0171047	0.756931	0.00960085	0.654997	-0.0115151	1	-0.00297589	1	-0.00282422	0.996542	0.00322223	0.167256	0.0202651
SYNC	0.9415	0.00339999	0.933886	0.00364795	0.50538	0.0110478	0.954945	-0.00481849	0.929793	0.00612713	1	-0.00138461	0.52089	-0.0133575	1	0.000576182	1	0.00107021	0.598685	0.0107991
FNDC5	1.48454e-09	0.0669468	0.00235424	-0.03683	0.937772	0.00350418	1.00695e-39	0.14102	3.51364e-11	-0.074621	0.000158685	-0.046357	0.50489	-0.0136881	0.218759	-0.0203473	0.152653	-0.0225826	0.805296	-0.00716666
ACP5	0.194291	-0.0180872	0.946615	-0.0033886	0.839918	0.00536115	0.641677	0.0111378	0.394689	0.0164452	1	-0.00223187	0.315136	-0.0177478	0.269831	-0.0189865	0.21267	-0.0205348	0.144629	0.0210997
CNN1	1.28527e-06	-0.0545774	2.02292e-07	-0.0587376	0.0623092	0.0235849	0.402141	-0.0155197	0.943672	-0.00579581	0.508558	-0.0142668	0.00126116	0.0405883	0.732081	-0.00946315	5.53759e-06	-0.0540193	0.0311512	0.0283318
FBXO9	2.04825e-09	0.0664074	0.000701698	0.0403583	1	-0.000587588	0.997296	-0.00376269	0.379908	0.0167382	0.878427	0.00698932	1	0.000319055	1	0.00305779	0.382729	-0.0161655	0.106296	0.022739
VPS50	0.912225	0.00390357	0.71253	-0.00772175	0.515451	0.0108719	0.938126	0.00521563	0.964667	0.00517708	0.887975	-0.0067813	1	-0.00142783	0.860204	-0.00694679	0.99767	-0.00319226	0.453383	-0.0134264
HARS	1	-0.000130473	0.0631002	-0.0247356	0.00520266	0.0331042	0.819517	-0.00786985	0.754826	-0.00965358	0.321834	0.0180073	0.984691	-0.00380541	0.461278	-0.0146578	0.976876	0.00371362	1	-0.00253305
ZMAT2	0.0457496	-0.0254811	0.283158	0.0162809	3.17146e-05	0.0470699	0.980617	0.00421552	0.264141	0.0193429	0.360468	0.0171506	0.238452	-0.0196927	0.595362	-0.012081	0.39871	0.015822	0.017128	0.030687
UBE2C	0.000365797	-0.0415474	0.000510504	0.0412291	4.04235e-37	0.135396	0.199921	-0.0203224	1	0.00270418	0.0613596	0.0272735	0.0521079	-0.027786	0.0765162	0.0261117	1	-0.000964007	0.000329004	-0.0430384
SMG5	0.310119	-0.0149995	1	0.00179429	0.00382936	0.0340963	0.241564	-0.019153	0.700362	-0.0106983	0.889925	0.00672553	0.322702	0.0175735	1	0.00241968	0.791391	0.00788	0.0546679	-0.0259338
CCT3	0.000409099	-0.0412471	1	-0.00181044	2.00764e-68	0.183996	0.153962	-0.0218201	1	-0.000849101	0.000845615	0.0419798	1	0.000562498	0.787167	0.00840418	2.08204e-09	0.0685211	9.44849e-19	-0.096736
GLMP	0.778765	-0.0061654	1	0.0017028	1.93827e-18	-0.0944933	0.639061	0.0111967	0.822687	0.00837912	0.917268	-0.0060716	0.0360055	-0.0293761	0.781357	-0.00850324	0.593385	-0.0118669	0.000309225	0.0432039
MEF2D	0.108522	-0.0213646	0.122529	-0.0214131	1	0.00171693	0.256121	-0.0187807	0.531485	-0.0137578	1	0.00143133	0.344549	-0.0170359	0.781945	0.00849458	0.32135	0.0175683	0.902365	0.00545091
TMEM79	0.794133	-0.0058955	1	-0.000343455	0.268799	0.0157761	1	-0.00351742	0.70197	-0.0106721	0.948114	-0.00525163	0.715729	-0.00962408	1	-0.00121077	1	-0.000311678	0.0577853	-0.0256839
SND1	0.00398537	0.03453	0.403105	0.0136063	0.235902	-0.0165922	0.773573	0.00873693	1	0.00023791	0.461766	-0.0151409	1	-0.00197678	1	-0.000303472	0.711864	-0.00953811	0.0462866	-0.0266587
COL18A1	0.0423241	-0.0258195	3.07736e-05	-0.0482831	1.83567e-57	-0.168674	0.0925112	0.0245112	1.18685e-27	-0.117979	1.50519e-06	-0.0566864	9.38599e-06	0.0525696	1	-0.00164767	8.63404e-07	-0.0577647	0.0452903	0.0267545
SLC19A1	0.496461	0.0111294	1	0.00146804	0.0353136	0.0260572	0.474534	0.014095	0.0568239	0.0276199	0.491947	0.0145836	0.648253	-0.0109226	7.03184e-05	-0.04828	0.434415	0.0150249	3.59822e-07	-0.0583478
KPNB1	0.000746725	-0.0395867	1.27443e-07	0.0596228	8.24117e-39	0.138489	0.112355	-0.023509	1	0.00352431	0.862948	0.00731069	1	0.000973548	0.636617	-0.0113193	0.00632227	0.0359586	3.60159e-06	-0.0537109
NPEPPS	3.07262e-05	-0.0477209	0.629687	-0.00925231	3.62364e-09	-0.0649935	0.00198064	0.0386805	0.0592828	0.0274277	0.615428	-0.0122601	0.208828	-0.0205469	0.0192826	0.0318427	0.119753	0.0239186	0.00020986	-0.0442209
TBX21	0.322557	-0.0147137	0.680572	-0.00831042	0.569732	0.00993905	1	-0.00165032	1	-0.00255636	0.320041	0.0180561	0.0764347	-0.0260431	1	-0.00157296	0.665261	0.01048	0.636607	-0.0101357
MRPL10	0.000171834	-0.0435278	0.673777	0.00843804	1.15825e-05	0.0493762	0.733057	-0.00948418	0.996148	0.00433244	0.639095	0.0118285	0.84911	-0.0069625	0.851904	-0.00710406	0.693143	-0.00991367	0.769151	0.00778466
CYP51	0.0562613	-0.0245748	0.0291622	0.0280641	9.33751e-09	0.0633581	1	-0.000280412	0.00345288	0.0377564	0.0239508	-0.0311643	0.89428	-0.00595984	2.05931e-11	-0.0755289	0.00029897	0.0448017	5.87831e-06	-0.0526642
TCF25	0.717754	-0.00720889	0.646916	0.00892467	0.00238132	0.0355972	0.0179994	0.031361	0.955838	0.00545736	1	0.0036362	0.00492948	-0.0364284	0.00851023	-0.0347633	0.860848	0.00643535	0.0835048	0.0239436
TUBB6	4.10283e-90	-0.210807	1.62871e-32	-0.127006	0.0138786	0.0296954	2.92085e-28	0.118939	0.564937	0.0131172	0.644269	-0.0117218	1.18546e-09	-0.0690574	0.000124396	0.0468803	6.15377e-19	0.0979609	0.983586	-0.00358653
DEF8	0.00212722	-0.0365039	0.929136	0.00374169	1	-0.00164345	1	0.000166089	1	0.00200693	1	-0.00250877	0.505909	-0.0136648	0.38568	-0.0162382	0.139095	0.0231161	0.967893	0.00395195
MEOX1	5.9202e-27	0.115231	6.88003e-22	-0.103908	0.000242017	-0.0420498	4.65123e-23	0.107341	1.56647e-05	0.0515544	0.0013379	-0.0406871	1	-0.000862972	0.195409	-0.021043	4.62704e-10	0.0709606	1.00997e-81	0.201639
SOST	0.858482	0.00483277	0.902116	0.00424176	0.549167	-0.0102713	0.988761	-0.00396876	0.6035	0.0124156	0.920019	-0.00597704	0.80254	-0.00789066	1	-0.00069951	0.790969	-0.00789212	1	-0.000472683
NKX2-1	6.80815e-106	-0.228145	1.30582e-21	-0.103232	1.7177e-240	-0.338566	1	0.0020769	0.346895	0.0174395	5.35204e-08	-0.0630177	3.30555e-204	0.313944	0	0.552103	3.07969e-21	0.103763	0.0149868	-0.0311847
PAX9	3.23562e-07	0.0573258	0.253269	0.0170535	1.32196e-24	-0.109755	0.0531776	-0.027039	0.0203694	-0.0318132	0.281102	-0.0189445	2.20344e-08	-0.0641481	0.00252089	-0.0386956	0.0764808	-0.0261883	0.000713651	0.0409235
IRX2	0	0.60444	0.49302	0.0118319	7.28238e-52	0.160244	0.652964	-0.0109337	4.16744e-45	0.150505	7.10071e-08	-0.0625093	0.000373417	0.0439083	0.147601	0.0226668	0.0548139	0.0277385	5.76893e-24	0.109614
COL1A1	1.2097e-124	0.247027	1.47771e-136	-0.258386	0.0339669	0.0262187	0.0131994	0.0325197	1.39786e-295	0.373629	4.37566e-54	-0.165124	0.0653445	-0.0267633	1	-0.000308797	0.0221376	-0.0314865	1.23288e-18	-0.0964281
ITGA3	0.048106	0.0252686	0.000865321	0.0397711	1.59926e-31	-0.124604	0.421132	0.0151398	0.0340839	0.029768	0.141605	-0.0231241	0.146891	-0.0227026	7.88729e-12	-0.0769354	1	0.00273268	1.10162e-06	0.0561647
SGCA	0.776763	0.00620116	0.99279	0.00247952	0.0377856	-0.0257692	0.983354	0.00412784	0.223415	0.0204707	1	-2.23706e-06	0.531851	-0.0131344	0.953505	-0.00475157	1	0.00185508	0.516362	-0.0122613
DLX3	0.030773	-0.027164	0.0487409	-0.0258864	0.405648	0.0128579	0.910766	0.00592226	0.819781	0.00844813	0.694433	-0.0107202	0.456062	-0.0146949	0.315279	-0.0178723	0.657935	-0.0106197	0.000979053	0.0400238
FOXM1	0.343062	-0.0142538	0.625324	0.009334	1.0272e-10	0.0708046	0.0132529	-0.0325032	0.927842	-0.00619259	0.994141	-0.00400452	0.498228	-0.0138366	1	0.001637	0.461425	-0.0144771	0.658413	-0.00977247
ITFG2	0.000155812	-0.0437812	0.905654	-0.00417461	0.234668	0.016624	0.00533655	-0.0355826	1	-0.00300779	0.756328	-0.0095759	0.557786	0.0126512	1	0.000457712	0.771365	-0.00829406	0.646194	-0.0099762
NRIP2	0.72404	0.00710929	0.0066287	-0.0334876	0.914705	-0.00397063	0.799895	0.00825225	0.830499	0.00818474	0.0168919	-0.0325047	1	-4.478e-05	0.980751	0.00408977	0.66644	-0.0104512	1	0.000587275
TULP3	0.0106131	-0.0312176	0.00405224	0.0351059	0.222941	0.0169401	0.723407	0.00967078	1	0.0025915	0.430575	0.0157189	0.0102622	-0.034035	0.836343	-0.00744849	0.954238	0.0042965	0.705973	0.00892356
GTF2H4	0.25795	-0.0162591	0.0010437	0.0392337	4.04618e-07	0.0564015	1	-0.000813501	0.630451	-0.0119072	0.0340864	0.0297806	0.944535	0.00480709	0.168509	-0.0219253	0.32207	0.0175514	0.895487	0.00557682
TUBB5	1.87061e-09	-0.0665572	0.000553025	-0.0410108	1.24823e-14	-0.0836735	0.179712	0.0209521	0.81532	0.00855056	0.788384	-0.0088933	0.886708	0.00611095	0.542674	0.013051	0.00141164	-0.0405489	0.0160078	0.0309375
ELL2	7.55481e-13	0.0784763	0.507659	-0.0115418	0.152631	-0.0191243	6.78207e-13	-0.0798756	2.50238e-06	-0.0554283	0.179606	-0.0217796	3.90801e-17	-0.092689	0.000356623	0.044234	3.86949e-08	-0.0635619	0.000186956	0.0445284
JUP	0.414302	0.0127642	0.0780718	0.0237256	2.61626e-13	-0.0795499	4.8882e-06	0.0534574	0.621097	0.0120842	0.54056	-0.0136844	0.391532	0.0160064	1.80781e-05	-0.0513724	0.0462759	-0.028474	2.42924e-10	0.0710479
FKBP10	3.54162e-08	-0.0614601	0.636747	-0.00911155	2.61848e-07	-0.0572429	0.828617	-0.00769027	0.0844278	-0.0257959	1	0.000110003	0.494572	0.0139115	5.39157e-05	-0.0488894	0.584459	0.0120375	8.0189e-10	0.0691232
KLHL10	0.6048	-0.00917255	0.580621	0.0101439	0.45293	-0.0119672	0.987193	-0.0040254	0.816201	0.00853208	0.715001	-0.0103462	0.37709	-0.0163226	0.289235	-0.0184934	0.647145	-0.010839	0.934229	0.00474702
MNX1	4.8147e-18	-0.09374	1.05827e-07	-0.0599678	0.0515528	-0.0244379	0.664526	-0.0107351	0.545253	-0.0134917	1	-0.00214999	0.865481	-0.00665995	2.23588e-16	-0.0908315	4.68799e-08	-0.0632134	0.183785	0.0197095
NOM1	0.15771	-0.0193322	0.320203	0.0154188	7.39735e-10	0.0676531	1	0.00194321	0.973996	0.00493752	0.907259	0.00629671	0.51232	0.0135222	0.868478	-0.00676384	0.240622	0.0197059	0.021062	-0.0299068
ERGIC1	0.07109	-0.0234778	6.63029e-12	-0.0757908	0.00239119	0.0355835	0.0993001	-0.0241329	0.951481	0.00560155	0.47898	0.0148223	0.000610706	-0.0425722	1	0.000123432	0.820572	-0.00731519	0.246738	-0.0179339
TNK1	1.24068e-09	-0.0672394	0.0227388	-0.0290425	0.0167683	-0.0289895	0.529551	0.013091	1	-0.000268358	0.685463	-0.010878	0.000251937	0.0449293	1.96739e-05	0.0511839	0.150495	-0.0226739	0.661465	0.00972494
ACAP1	0.936567	0.00348642	0.463009	0.0124234	0.320309	-0.0145916	0.991113	-0.00392621	0.954365	-0.00550416	1	0.00201446	0.962768	0.00437299	0.761382	-0.00888154	1	-0.00297778	0.715427	-0.00875599
TCEA3	0.0147596	0.0300215	6.69283e-07	-0.0564232	0.305274	0.0149184	3.13479e-37	0.136525	0.000565968	-0.0429107	0.998428	0.00388549	0.117968	-0.0238938	0.684386	0.0104043	0.843686	0.0067998	0.00108825	0.0397185
CSN3	5.50214e-15	-0.0851043	2.08738e-12	-0.0774471	0.0012156	0.0376144	0.916373	0.00577766	0.71226	-0.0104876	0.765001	-0.00939037	0.0372442	-0.0292318	1.01113e-17	-0.0945469	0.678565	0.0101765	8.98593e-09	0.065072
IFRD1	0.00266543	-0.0358143	0.00372997	-0.0353716	7.56526e-13	0.0780659	0.00164587	-0.039214	1	-0.00200056	3.45954e-16	0.0904173	0.884077	0.00619847	0.0760586	0.0261412	1	-0.0026419	1.99751e-14	-0.0845129
STK38L	1.64628e-09	0.0667741	0.000390192	0.0419603	0.403892	-0.0128943	0.273375	-0.0183564	0.762895	-0.00947887	0.044378	-0.0286956	0.995498	0.00352244	0.0850275	-0.0255852	1	-0.00263411	0.446211	0.0135537
BRPF1	0.01535	-0.029878	0.486482	0.0119644	0.389755	0.0131749	0.473278	-0.0141186	0.925635	0.00624684	0.937332	-0.0055238	1	0.00224681	0.991082	-0.00381793	0.221973	0.020263	0.232192	-0.0183062
AKR1B3	3.89932e-74	0.19148	1.37638e-51	0.160074	5.94464e-84	0.203598	0.00834309	-0.0341102	0.000389926	-0.0439033	0.876954	0.00702048	0.698835	-0.00997312	0.75161	0.0090844	3.4245e-38	0.139065	0.385924	0.0147285
HOXC13	0.378972	0.013493	0.885793	0.00455741	0.73375	0.00721767	0.725427	-0.00962884	0.994001	-0.00442557	1	-0.0020262	0.937322	-0.00499541	0.841714	0.00733617	0.784085	0.00803564	0.000409207	0.0424595
HOXC8	1		1		1		1		1		1		1		1		1		1
GSTT1	0.00216772	0.0364471	1.99056e-09	-0.0669482	1.04981e-11	-0.0742686	0.00306295	-0.0373668	0.00126546	-0.0406996	0.627108	0.0120361	0.232526	0.0198551	0.00155042	0.0401409	0.0426066	-0.0288322	0.0181044	0.0304744
GSTT3	0.635933	-0.00864296	1	-0.00103867	0.108737	-0.0209098	0.929548	-0.00546277	0.131526	0.0235188	0.465389	-0.015077	0.503059	0.0137399	0.830546	-0.00755914	1	-0.00183867	0.00136683	0.0390371
DDT	0.348383	-0.0141409	0.619175	-0.00944171	1.25245e-16	0.0895054	0.220632	0.0197186	0.0684891	-0.0267701	0.023248	0.0312876	0.400051	0.0158327	0.701662	-0.0100472	0.0217245	0.0315572	1.32307e-09	0.0683057
MARVELD3	1	0.00128544	0.0111354	0.0317026	0.0527604	-0.024332	0.961569	0.00468277	1	0.00418936	0.882329	-0.00691596	0.438672	0.0150296	0.937733	0.00514724	0.970963	-0.00384446	0.845777	0.00646965
DDX18	2.29583e-14	-0.083239	0.20207	-0.0185271	4.9441e-88	0.208417	0.0355596	-0.0287465	1	-0.00085262	2.5076e-05	0.0507244	0.281126	0.018587	0.000117037	-0.0470366	0.0275681	0.0306262	6.72261e-08	-0.0615022
UBL3	4.0049e-113	0.235628	1.46934e-26	-0.114648	0.000194509	-0.0426179	0.0160632	-0.0317804	3.56583e-10	0.071034	1.60753e-19	-0.0993995	2.62493e-08	-0.0638413	0.56994	0.0125534	1.28899e-08	-0.065468	0.0116609	0.0321122
GRAMD3	0.308188	0.015041	3.63528e-06	0.0529734	1	4.35048e-05	1	-0.000565188	1	-0.00174247	1	-0.000963002	0.989192	-0.0036719	0.198504	-0.0209489	0.147216	-0.0227909	0.0012766	0.0392426
EEF1E1	6.06955e-14	-0.0819439	0.680848	-0.00830502	1.30781e-29	0.120684	0.404651	-0.0154703	1	0.00121444	1.25105e-09	0.0693675	0.984176	-0.00384779	0.927708	-0.00544712	1	0.00191133	0.00054256	-0.0416962
AKT1	0.974413	0.0028095	1	-0.00134577	1	-0.00203919	0.97685	0.00429947	0.903787	-0.0067513	8.40651e-08	0.0621997	0.389815	-0.0160428	0.940966	0.00506725	1	-0.00180681	0.568947	-0.0113104
CLDN15	0.140956	0.0199567	0.95315	0.00324936	0.91669	-0.00392772	0.359953	-0.0163935	0.822383	0.00838537	0.970182	0.00465561	1	0.0001817	1	-0.000575033	1	0.00259809	0.413958	0.0141789
IL16	0.0408275	0.0259725	0.850002	-0.00521078	0.772078	0.00653466	0.829879	-0.00765964	0.151641	0.0227485	0.979144	-0.00438653	1	-0.0017537	0.976904	0.00418247	0.697378	-0.00984234	0.815738	-0.00698539
TCIRG1	1	-0.00202969	0.482339	0.0120507	0.0324614	-0.0264065	1	0.00274757	1	-0.00261801	0.959907	0.00496749	1	-0.00179401	0.411644	-0.01568	0.488752	0.0139389	0.717673	0.00871755
NAGLU	0.000108598	0.044688	0.324037	-0.0153293	2.38829e-05	-0.0477314	1	-0.00303122	0.437681	-0.0155569	1	-0.00338624	0.396089	-0.0159111	0.177581	-0.021618	0.731742	-0.00912979	1	0.00269371
COASY	0.262034	-0.0161562	0.310083	0.0156503	0.377481	0.0134117	1	-0.000598765	0.456002	0.0151836	0.901173	-0.00643409	0.819791	-0.00754774	1	0.00163011	0.260758	0.0191446	0.00288655	0.0367719
SMO	0.0456069	-0.0254956	0.0214564	0.029268	1.85129e-05	-0.0483133	0.588542	0.0120666	0.822963	-0.00837278	0.453287	0.0152933	0.214063	-0.0204003	2.70932e-09	0.0679451	0.364538	0.0165845	0.0260515	-0.0290692
TSPAN33	5.4529e-12	-0.0756469	1.9436e-10	0.070694	0.000366147	0.0409568	4.074e-05	0.0487955	0.110751	0.0244456	0.519293	0.0140864	0.249659	-0.0193902	0.0137661	0.0330487	0.592388	-0.0118899	0.312733	-0.0163209
CRNKL1	4.4101e-05	-0.0468721	0.388813	-0.013897	4.33094e-07	0.0562678	0.00611566	-0.0351243	0.296207	-0.0185649	0.714408	0.0103547	0.412707	0.0155571	0.130273	-0.023391	0.8605	0.00644509	1	-0.00069395
RIN2	0.0013306	-0.037907	0.811207	-0.00592287	5.19179e-05	-0.0459024	0.248385	0.0189841	0.958636	0.00538649	0.908251	0.00627299	0.801496	-0.0079312	0.758371	0.00896402	0.0652905	0.026944	0.687706	0.00926268
FOLH1	0.00462582	0.034052	5.95527e-09	-0.0650954	0.0288398	0.0268808	2.32688e-06	0.0549817	0.263269	0.0193642	0.0306082	-0.0302024	0.0248743	-0.0308346	0.975947	-0.00420245	1	0.00272275	0.918139	0.00509649
CHORDC1	7.62405e-11	-0.0716897	0.529592	0.0111231	1.26012e-07	0.0586416	0.558729	0.0125609	0.470705	0.0149179	0.00117963	0.0410489	1	-0.00163296	0.844138	0.00729561	0.869311	0.00625701	0.407006	0.0143095
RTCB	0.810692	-0.00562367	0.99933	-0.00234091	1	0.000923448	0.884953	0.00644782	0.355643	-0.0172425	0.41979	0.0159124	1	0.00200543	0.0717705	-0.0264119	0.564156	0.012459	0.589753	-0.0109557
PWP1	0.190241	-0.0182246	0.0475046	0.0259993	1.78217e-39	0.139683	0.876722	-0.00661977	1	-0.00301121	0.0864254	0.0256584	0.700228	0.00993764	1	0.00298202	0.0129039	0.0335081	1.77974e-08	-0.0638897
FBXO7	4.28509e-08	-0.0611161	0.189179	0.0189278	0.934475	-0.00357636	0.677731	0.0104991	0.824362	-0.00834367	1	-0.00137065	1	0.00203067	0.797595	-0.00819083	0.821264	-0.00730073	0.393184	0.0145774
CAPNS1	0.357889	-0.0139374	4.25667e-06	-0.0526404	5.55756e-15	-0.0847289	0.0184353	0.0312634	0.346275	-0.0174575	1	-0.00353767	0.576387	0.0123059	0.205251	-0.0207328	0.00195923	-0.0396022	4.89136e-06	0.0530613
LRP3	0.0381257	0.0262676	0.152356	0.0202139	0.903174	0.00420705	0.744173	0.00929104	0.203699	-0.0210374	0.186955	0.0215483	0.971954	-0.00415677	1	-0.00189449	0.0527913	0.0279022	1.247e-11	-0.0755631
HOXD13	1	0.000918185	0.0732513	-0.0240308	0.983235	0.00259209	0.91288	-0.00587326	0.0702427	0.026654	0.567838	-0.0131757	1	0.00184835	0.897101	-0.00616539	0.515057	-0.0134104	0.217543	-0.0187078
FOLR1	1.10732e-18	0.0954416	1.01016e-28	0.119289	4.37099e-31	-0.12372	2.18489e-08	0.0638114	0.000550974	0.0429939	0.012836	0.0335127	1.9723e-14	-0.084913	1	0.00277085	5.77542e-07	-0.0585466	2.36673e-68	0.184723
CLPB	6.63342e-19	0.0960273	4.31622e-08	0.06162	0.00485519	0.0333265	0.511235	-0.0134138	0.232838	-0.0201963	0.925684	-0.00582426	0.0841101	0.025587	0.379549	-0.0163861	0.457321	0.0145528	0.331899	0.0158953
SEPT7	1.23063e-06	0.0546671	0.698273	0.00799311	0.970425	-0.00286561	1	0.000323823	0.664531	0.01133	0.615188	-0.0122705	0.529503	0.0131899	1	0.00183975	0.0373311	-0.0294149	4.48615e-06	0.0532422
ZDHHC4	1	0.000921467	0.876201	-0.00473105	0.199158	0.0176228	0.99748	-0.00374702	0.0218092	0.0315525	0.502156	-0.0143891	1	0.00221058	0.648901	-0.0110779	0.957466	-0.00421519	1	0.00248636
RAC1	0.393922	0.0131801	0.866849	0.00489669	2.01957e-06	0.0531511	0.197509	0.0203941	0.884408	-0.00712653	0.72391	-0.010202	0.468457	-0.0144423	0.144879	-0.0227775	1	0.00155271	0.0175756	0.0305856
NUP214	0.785718	0.00604227	0.209708	0.0182948	1.49027e-06	0.0537794	0.13179	-0.0226904	0.289111	0.0187323	1	0.000667729	0.884269	-0.0061921	0.520549	0.013479	0.836975	0.00695171	0.0681923	-0.024928
AIF1L	4.80435e-13	-0.0791085	0.985778	-0.00262049	0.878594	-0.00465794	0.473278	-0.0141186	0.0556748	0.0277198	0.00164825	0.0400728	7.99272e-07	-0.0575568	1.916e-07	0.0605239	2.96952e-06	0.055305	2.36177e-19	-0.0983188
CPA3	1		1		1		1		1		1		1		1		1		1
LTBP1	5.68927e-148	-0.268449	1.56996e-41	-0.143636	4.45292e-119	-0.241645	0.0796119	-0.0252161	0.283626	-0.0188558	1.06141e-08	-0.06585	3.32021e-32	0.127231	0.00100021	0.0414543	9.38323e-07	-0.0576081	0.00356004	0.0361079
UGP2	6.17853e-05	0.0460643	0.0419604	0.0265363	1.95253e-12	-0.0767195	0.000306494	0.043856	6.95961e-05	0.0481854	1	-7.72541e-05	0.803647	0.00787336	0.369021	0.0166339	0.000191679	-0.0459372	1	-0.00277268
KCNH6	0.426652	-0.0125119	0.517638	0.0113518	0.657607	0.00846977	0.87647	-0.00662863	1	0.000888794	1	0.000881318	0.0717814	-0.0263277	0.801191	0.00811667	1	0.0011822	1	-0.00083199
TRMT1	0.133407	-0.0202795	0.833952	-0.00549891	3.20493e-05	0.0470456	0.930665	0.00542061	1	-0.00184629	0.244678	0.0198891	0.25069	-0.0193626	0.00319022	-0.0379615	0.183212	0.0214613	0.266733	-0.0174166
NACC1	0.379539	-0.0134814	0.669566	-0.00851571	0.000205249	0.0424806	1	0.00362868	1	0.00411361	1	-0.00365694	1	0.00246699	0.792618	-0.00831648	0.171869	0.0218684	0.365195	-0.0151568
NFIX	0.482426	0.0114017	0.831469	0.00554839	0.3262	0.0144647	0.630013	0.0113505	0.274461	0.0190878	0.917268	0.0060727	0.630426	-0.0112413	0.967156	0.00440576	0.869311	-0.00625991	0.967294	-0.00398017
SLC1A5	1.76267e-18	-0.094908	1.10418e-11	0.0750462	6.45475e-31	0.123376	9.9809e-05	0.0466904	0.0462458	0.0285033	4.15002e-06	0.0546255	0.0169821	-0.0322425	0.707599	0.00993349	0.0305353	0.0302256	4.71157e-05	-0.0479474
UBA1	1	0.0022948	0.483495	0.0120275	0.426739	0.0124452	0.483218	0.0139307	1	0.000292492	0.381983	-0.0166872	0.862821	-0.00670959	0.199155	-0.0209274	1	-0.00177456	1	0.00180523
VWF	0.5002	-0.0110535	0.00104771	0.0392223	0.0944562	0.0216198	0.40326	0.0154949	0.332665	0.0177341	0.356595	0.0172256	0.899972	0.00582926	0.899119	0.0061178	0.0125605	-0.033604	0.500632	0.0125456
SIAE	0.635157	0.00865381	0.0915157	-0.0229366	1.79927e-05	-0.0483795	0.968131	0.00451594	0.516652	0.0140466	0.869881	-0.00714909	1	-0.00189891	0.535689	-0.0131967	0.220394	-0.0203278	0.0264208	0.0290131
VSIG2	0.750671	0.00664177	0.240998	-0.0174034	1	0.00191281	1	-0.00295488	0.0278744	0.0305864	0.594195	-0.0126521	0.895825	0.00592788	0.545103	-0.0130046	0.929161	0.00491455	0.832118	0.00672012
ESAM	0.2005	-0.0178929	0.816298	0.00584803	0.780458	-0.0063897	0.924301	0.00558534	1	-0.00220818	0.735281	-0.00998181	0.607447	0.011712	0.992044	-0.00379527	0.138968	-0.0231266	0.0998656	0.0230689
SPA17	0.0435252	-0.0257015	0.153754	-0.0201618	0.280984	-0.015486	0.96436	-0.00463563	0.618385	-0.012138	1	-0.00331675	1	0.00145072	0.0581212	-0.0273921	0.889711	0.00578584	0.017958	0.0305048
FAM50A	0.0971414	-0.0219343	0.786537	-0.00637218	2.93848e-05	0.0472502	0.811302	-0.00802677	0.758107	-0.00955908	1	-0.00289741	0.950875	-0.00464315	1	0.00354694	0.709245	0.00959725	0.986358	0.00348839
EMD	0.0195373	-0.0289558	5.7403e-07	0.0567265	9.53892e-17	0.0898397	1	0.000799732	0.647157	-0.0116375	0.328758	0.0178384	0.850265	0.00694555	0.864427	-0.00686168	0.01487	0.0329821	0.738437	0.00832614
TACO1	0.396292	-0.0131317	0.0801814	0.023595	7.69931e-06	0.0502872	0.967115	0.00454337	0.986022	0.00462728	0.898562	0.00649777	0.951106	-0.00462095	0.202173	-0.0208376	0.911116	0.00532113	0.63649	-0.0101376
GRIK3	1.29758e-143	0.264606	2.53027e-13	-0.0803943	0.0882158	0.0219469	2.72938e-15	0.0871557	2.92073e-13	-0.081472	3.39749e-08	0.0638272	7.18957e-32	0.12657	1.32522e-11	-0.0761775	0.285702	0.0185049	1.96526e-08	-0.0637135
GRIA3	1.03724e-34	0.131027	1.26492e-11	0.074846	0.926251	0.00374498	0.889065	-0.00638096	1.80077e-26	0.115431	4.18832e-05	-0.0495361	6.42303e-08	-0.0622503	0.961098	0.00456092	0.000620026	-0.0428673	0.340862	-0.0156992
NPAS1	3.9621e-26	-0.113414	6.02617e-15	-0.0853674	0.907439	0.00413154	0.00311645	-0.0373014	0.0192712	-0.0320348	0.00136621	-0.0406217	4.22196e-08	0.0630049	0.00386498	-0.0373719	1.0343e-25	-0.114203	0.00110337	0.0396775
SIPA1L2	0.00559121	0.0334243	1.52478e-05	0.0498743	0.155776	0.0190097	0.362738	-0.0163252	0.224886	-0.0204312	1	0.000109812	0.561658	-0.0125923	0.298053	-0.0182797	5.25148e-05	0.0490773	1	0.0013515
AP4E1	0.384812	0.0133728	0.693446	0.00808466	0.947374	0.00333344	0.900452	-0.00612425	0.8906	0.00702522	0.481884	0.0147697	0.537077	-0.013032	0.965641	-0.00445667	1	0.000397116	0.628096	-0.0102684
BLVRA	3.95432e-17	0.091246	6.10146e-10	0.0688711	0.152631	-0.0191245	0.019592	-0.0310468	0.89046	-0.00702719	1	0.000247679	0.717843	0.00958772	0.0189581	0.0319091	0.0394359	-0.0291606	3.56675e-09	0.0666534
PDZD4	2.78613e-38	-0.13766	0.171488	0.0195308	0.000573009	0.0397379	0.841307	-0.00741292	0.93823	0.00593211	0.920342	-0.00597052	0.888589	0.00607805	0.680977	0.0104758	0.706716	0.00965067	3.57435e-18	-0.0951864
SRPK3	0.475352	0.0115437	0.644843	0.00896398	0.909404	0.00409243	0.476896	0.0140572	0.473445	-0.014864	0.669235	-0.0112253	0.969493	-0.00422041	0.251637	0.0194649	0.447635	-0.0147633	1	-0.00147581
IDH3G	0.0685751	-0.0236485	1	0.00176477	1	0.00159054	0.689412	0.0102805	1	0.00143752	0.131459	0.0235149	0.0410385	0.0288078	0.41096	-0.0156921	0.142355	-0.0229818	0.678551	0.00942707
PNCK	0.0594327	-0.0243157	0.684868	0.00823552	0.00129761	-0.037422	0.987847	0.00401145	0.895143	0.00693656	0.837502	0.00787702	0.698835	0.00997207	1	-0.00295043	0.336056	-0.0172514	0.0290618	0.0286221
SSR4	0.680395	-0.00784402	0.498041	0.0117347	0.22514	0.0168826	0.698137	0.010108	0.0816108	-0.025958	0.00404035	0.0373831	0.379488	-0.0162754	0.768415	-0.00876243	0.000224057	-0.045544	1.07593e-05	0.0513503
BCAP31	0.17668	0.0186691	0.0966029	0.0226659	0.00267177	-0.0352397	0.354665	0.0165074	0.848557	-0.00782701	1	0.00204354	0.439035	0.0150225	0.112298	-0.0241774	0.681976	-0.0101113	0.367385	-0.0151142
FAM98A	0.0478169	-0.0252947	0.760005	0.00685321	8.3903e-20	0.0980721	0.481155	-0.0139698	0.863448	0.00755423	0.0917094	0.025362	0.937695	0.00498689	0.0648277	-0.0268995	0.343939	0.0170669	0.0013972	0.0389688
LTBP2	0.0371349	0.0263821	0.00791989	-0.0328909	0.928528	0.00370464	0.0100918	0.0334625	0.917629	0.00641544	0.471522	-0.0149614	1	-0.00291142	1	-0.00149664	0.830584	-0.00710916	0.203153	-0.0191145
KMT2A	1	-0.000627256	0.0932218	0.0228421	0.676033	-0.0081655	0.933689	0.00532935	0.139591	0.023203	1	-0.00256597	0.759012	-0.00877579	0.997279	0.00362426	1	-0.00260455	0.384631	-0.0147537
IFT46	0.015202	-0.0299144	1	-0.00068131	2.93438e-09	-0.0653508	1	-0.00340852	0.0293765	0.0303802	0.845631	0.00770798	0.333857	-0.0173111	0.997328	0.00362245	0.57806	-0.0121625	0.0280338	0.0287785
TMEM25	0.102253	-0.0216699	0.60361	0.00972763	0.850693	-0.00514926	0.761703	0.00895314	1	0.00320219	1	-0.00202586	0.769414	-0.00856571	0.953635	0.0047482	0.438544	-0.0149428	0.348269	0.0155282
CD3G	0.570581	-0.00978946	0.908052	0.00413071	0.142457	-0.0194989	0.864046	0.00690804	0.908358	0.00665286	0.979774	0.00437008	0.909765	0.00559929	0.0107299	0.0339536	0.565505	0.0124291	0.960225	-0.00417065
TRAPPC6A	1.51788e-16	0.0896208	0.749033	0.00705911	2.22543e-30	-0.122277	0.0404335	0.0282093	0.0820371	0.0259279	0.0676247	-0.026825	0.0405448	0.028858	0.370962	-0.0165823	0.0850039	-0.0256887	0.671715	0.00955806
SUPT6	0.606065	0.0091529	0.292866	-0.0160466	0.81467	-0.00580185	0.83019	-0.00764974	0.575358	0.0129277	1	-0.00165171	1	-0.00191421	1	-0.000327469	0.977392	-0.00369289	1	-0.00127711
SPAG5	0.0449887	-0.0255537	0.280368	0.0163463	9.65214e-05	0.0443845	1	-0.00161844	0.923741	0.00629809	0.772513	-0.00923683	0.551943	-0.0127561	0.948051	0.00492709	1	-8.1875e-05	1	-0.000725159
UNC119	1.14426e-58	-0.170466	5.75536e-07	0.0567208	0.549524	-0.0102648	1.79693e-13	0.0816873	0.00561398	0.0362458	7.24473e-11	0.0738098	2.83718e-08	-0.0637056	0.0996614	0.024785	1.15743e-07	0.0615698	1	0.000864294
RAB34	0.00383274	0.034655	0.00356259	0.0355232	1.33268e-37	-0.13629	0.782178	-0.0085732	0.00627289	-0.03591	1.55564e-07	0.0610715	3.49641e-05	-0.0496792	2.05695e-08	0.0645282	0.819444	0.00733965	3.27962e-23	-0.107847
SDF2	2.98012e-08	0.0617695	1	-0.000956014	1.61065e-21	-0.102395	0.258042	0.0187318	0.0458877	0.0285392	0.924459	0.00586114	0.343798	-0.0170603	1	-0.000792324	0.244727	-0.0195952	0.663248	0.00969897
CCNE1	1.7165e-38	-0.138042	0.138653	0.0207428	4.8765e-54	0.163581	0.201799	-0.0202675	1.74417e-06	-0.0561508	0.0019582	0.0395872	0.0517878	0.0278131	0.00658883	-0.0356288	0.000146746	0.0465904	0.0140022	-0.0314372
HSF2BP	0.870519	0.00463716	0.638961	0.00907289	0.500695	0.0111306	0.929467	0.00546613	0.365859	0.0170077	0.38284	0.016669	1	-0.00268575	0.435853	-0.0151601	0.861783	0.00641949	0.287851	-0.0168866
BBC3	9.90709e-21	-0.100725	1.8654e-11	-0.0742719	6.73299e-06	0.0505782	0.00105589	-0.0404928	0.612491	-0.0122493	0.302772	0.0184314	0.483394	0.0141348	0.341448	-0.0172719	0.839451	0.00689816	0.982828	-0.00361329
MYBPC3	0.351125	0.0140834	0.673126	0.00845106	0.926196	0.00374687	1	-0.00303556	0.981972	-0.00473834	0.0134907	0.0333402	1	0.000491113	0.954633	-0.00471787	0.94588	0.00450647	0.242558	0.0180401
PSMC3	0.000282001	-0.0422416	0.341804	0.0149247	0.22753	0.0168171	0.580431	0.0121988	0.0798051	0.0260532	1	-0.00198611	0.760605	-0.00875026	1	-0.000775263	0.138161	0.02316	0.0031629	0.036477
ACP2	1	-0.0017146	0.821611	-0.00574655	5.0697e-05	-0.0459599	0.907194	-0.00600927	0.738753	0.0100006	1	-0.00287013	1	0.00222595	0.686354	-0.0103451	0.602263	-0.0117128	0.192475	0.0194387
RAPSN	0.95071	-0.0032413	6.36765e-49	-0.155891	1.35758e-05	0.0490181	0.00286224	0.0375752	1.91908e-37	0.137242	5.39971e-06	-0.0540707	2.84013e-08	-0.063702	0.000269052	-0.0449511	5.35358e-10	0.0707217	1.37456e-29	-0.121861
SLC39A13	0.0086975	0.0319248	0.00239226	0.0367827	0.924497	-0.00379691	0.932391	0.00537969	0.357938	0.0171814	0.596257	0.0126093	0.844395	-0.00705211	0.809501	-0.00795178	0.952819	0.00432734	0.0605328	0.0254709
CELF2	6.9563e-18	-0.0933086	2.93837e-07	0.0580236	0.00119919	-0.0376538	2.30472e-30	-0.123292	1.04733e-24	-0.111501	0.00222374	-0.0391979	0.880999	0.00628305	3.74232e-17	0.0929951	0.0878912	0.0255273	4.04239e-45	-0.150419
NR1H3	0.0034329	-0.0350098	0.937543	0.00358071	0.401059	0.0129508	1	-0.00238123	0.854956	0.00771511	0.64061	-0.0118031	0.272655	-0.0188059	0.997234	-0.00362626	0.683648	0.010079	0.000763301	0.0407397
DDB2	0.00671916	-0.0328096	0.490434	-0.0118904	0.731324	0.00726383	0.497066	-0.0136757	0.954532	-0.00549982	0.153275	-0.0226796	0.340492	0.0171397	1	0.00125905	0.920715	-0.00509549	0.747871	0.00816744
SPI1	0.403003	0.012993	0.653456	0.00880764	0.938487	0.00348697	1	-0.000708852	0.838847	-0.00801628	0.961432	0.00491822	0.277175	0.0186862	0.761584	-0.00887232	0.588315	0.0119661	0.50851	-0.0124089
SF3A1	0.498363	-0.0110913	0.00181757	0.0376122	4.8396e-18	0.0934201	0.33229	-0.0169857	0.140772	0.023159	0.651458	0.011581	0.384802	-0.0161406	0.575827	-0.0124341	0.227328	0.0200985	1.11366e-05	-0.0512752
STAT6	1.40056e-07	-0.0589197	1.88576e-05	-0.049403	0.0322705	-0.0264311	0.384815	0.0158713	1	-0.00183658	0.0101346	-0.0343451	0.649128	0.0109083	0.616623	-0.0116685	0.466629	-0.0143789	0.00740729	0.0337085
CLGN	0.48846	-0.0112793	0.000532248	0.0411152	0.523299	0.0107246	0.773378	-0.00874067	1	0.00093823	0.597981	-0.0125749	0.187149	-0.0212592	0.883264	-0.00646468	0.658714	0.010603	0.247428	0.0179162
NAPSA	3.60511e-77	0.195314	1.02508e-81	-0.201049	0.00254547	-0.0353928	0	0.38998	3.1457e-61	-0.175076	4.53356e-48	-0.155837	1.96973e-06	-0.0557989	0.296659	0.0183137	0.0014068	-0.0405592	3.54779e-05	-0.0486152
VRK3	0.0130509	0.0304704	0.456922	-0.0125354	1	0.000472979	0.11435	0.0234151	0.000666874	0.0424677	0.395846	-0.0163887	0.770305	-0.00854134	1	-0.00173213	0.0107481	-0.0341578	1.19114e-05	0.0511195
SMG9	1	-0.00163039	1	-0.000590742	0.689344	-0.00795571	0.451722	0.0145365	0.981386	-0.00475738	0.826533	-0.00810977	0.535101	-0.0130684	0.953672	0.00474108	0.813919	-0.00743115	0.707695	0.00889183
PAXIP1	0.1563	0.0193862	1	0.00186307	1.50597e-05	0.0487839	0.175042	-0.0210969	0.234494	0.0201354	0.799485	-0.0086793	1	0.002137	0.866487	0.00680498	0.176927	0.0216864	0.370597	-0.0150506
RMND5A	0.2121	0.0175369	0.00389332	-0.0352372	0.000326418	-0.0412617	0.210854	0.0199899	1	0.00365213	0.367428	-0.0169824	0.553833	-0.0127141	0.0810854	0.0258205	1	0.00059911	0.000912667	0.0402266
MOV10	9.18326e-05	-0.0451114	0.0114104	-0.0316154	0.00440677	-0.0336447	0.735291	-0.00944289	0.16361	0.0223245	1	-0.00284554	1	-0.00103897	0.441249	-0.0150415	0.017714	-0.0323366	0.00295836	0.0366919
PPM1J	0.0511	0.024996	0.000663147	-0.0405155	0.268195	0.0157907	0.00531788	0.0355957	0.0123052	0.0336335	0.408969	-0.0161219	0.740186	-0.00915644	1	0.00245525	1	0.00122149	0.0538266	0.0260076
RHOC	8.21901e-14	0.0815326	0.310548	0.0156381	0.0273939	0.0270929	0.813396	0.00799303	0.315813	0.0181112	0.0305784	0.0302068	4.4227e-10	-0.0706289	0.796757	-0.00820289	1.2515e-07	0.0614224	4.73409e-17	0.0921242
TEAD3	0.104112	-0.0215778	0.000576496	-0.0408971	1.24453e-07	-0.0586666	0.506206	0.013504	0.432902	0.0156457	0.971421	0.00462396	0.64709	0.0109372	1	-0.00110629	0.41434	-0.0154767	0.260211	0.0175766
PPARD	0.290486	0.0154597	0.730511	-0.00740269	0.594024	0.00951649	0.851235	-0.00717873	1	-0.0024044	1	-0.00332429	0.804652	-0.0078556	0.657484	-0.0109045	0.966807	0.0039358	0.266733	0.0174162
DEF6	0.700049	-0.00749706	1	-0.00079406	0.957627	0.00311999	0.697153	0.010134	1	0.00325254	0.84058	-0.00781251	0.334378	-0.0172948	1	0.00127283	1	-0.00149731	0.283739	0.0169849
PEG3	4.27212e-08	-0.0611222	4.9697e-12	0.0762055	2.10108e-198	-0.309064	1.83179e-30	0.123497	1.10939e-39	0.141279	2.86627e-05	-0.0504122	6.86535e-31	0.124623	0.345561	0.017183	7.39335e-36	-0.134779	1.13768e-98	0.22108
ZIM1	0.385644	-0.0133541	0.993536	-0.00246119	1.23279e-13	-0.0805931	0.291427	0.0179094	0.0555717	0.0277286	0.896565	0.00653173	0.00232345	0.0387898	2.82742e-08	0.0639758	0.730447	-0.00917043	0.0356365	0.0277721
METRN	1.57076e-46	-0.151841	8.58651e-43	0.145811	1.42931e-26	0.114185	0.0154613	-0.0319324	0.561712	-0.0131743	4.90913e-10	-0.0708607	1	-0.00318577	2.11155e-12	-0.0788541	3.46972e-16	0.0904861	2.85143e-13	0.0809361
LMF1	0.0857541	0.0225492	0.886115	0.00455157	0.00807721	-0.031616	0.930026	0.00544873	0.700752	-0.0106896	0.806983	-0.00850797	0.969493	-0.00421877	0.990146	0.00383755	0.460354	-0.0145007	1	-0.00184619
NARFL	0.131853	-0.0203392	0.829669	0.00557889	0.236625	0.0165737	1	0.00128444	0.782626	0.00914152	0.848557	-0.00764095	0.16536	-0.0220257	1	-0.00128329	0.658714	-0.0106028	0.22264	0.0185647
ANGPTL4	3.46186e-11	-0.0728934	0.00126436	-0.038679	0.819393	0.00571766	0.621633	-0.0114901	0.25722	0.0195215	0.586775	0.0128039	0.113754	0.0240896	0.00108161	0.0412174	0.0469285	0.0284164	1.06022e-08	-0.0647842
DBF4	6.3364e-15	-0.0849204	1	-0.00201382	2.17897e-26	0.113781	0.416614	-0.0152302	1	-0.00223872	1	-0.00373458	0.0210628	0.0314507	0.0110051	0.0338581	0.865288	0.00633673	0.000612783	-0.0413536
DAXX	0.0019009	-0.0368411	0.454065	0.0125918	1.71322e-05	0.0484904	0.271501	-0.0184006	1	0.00417397	0.710747	-0.0104222	0.836748	0.00720755	0.882063	-0.00648833	1	0.00266959	0.0693416	-0.0248417
CD320	0.00849002	-0.0320056	0.0199142	0.0295551	2.30529e-08	0.0617508	0.00938017	0.0337147	0.0128132	0.0334839	0.0792608	0.026083	0.0212369	-0.0314176	0.0215259	-0.0314289	0.0223758	0.0314439	0.339943	-0.0157157
IPO4	2.30684e-05	-0.048383	0.191346	0.018858	4.17507e-19	0.0962577	0.056919	-0.0267436	0.580843	-0.0128183	0.0699429	0.0266761	0.702347	-0.00989418	0.00605745	-0.0359023	0.963651	-0.00400434	0.832947	-0.00670741
TM9SF1	0.0164681	-0.0296115	0.33106	-0.0151639	0.742473	0.00706017	1	-0.00182559	1	-0.00195407	0.644225	0.0117237	0.702369	-0.00989236	0.737952	0.00934462	0.191709	0.0211803	0.897893	-0.00553392
REC8	0.00239034	-0.0361473	0.345737	-0.0148356	1	0.000328183	1	-0.00322471	1	-0.00146383	1	-0.00171568	1	-0.00188907	0.430914	-0.0152666	0.481225	-0.0141045	0.230544	0.0183474
IRF9	0.0577997	-0.0244443	1	-0.000886236	0.930084	0.00367513	0.829819	-0.00766529	0.93091	0.00609479	1	0.000333079	1	-0.00181702	1	0.000555947	0.705012	0.00968512	0.793974	-0.0073571
GMPR2	0.942149	-0.00338687	0.000657971	0.0405377	2.97143e-07	0.0569973	0.0358059	0.0287161	0.686004	0.0109676	0.389916	0.0165138	0.891413	0.0060285	0.902482	-0.00603437	0.965596	-0.00397057	0.636885	-0.0101296
MDP1	0.0676584	-0.0237111	0.000169109	0.0441347	5.42199e-07	0.0558237	0.110653	0.0235875	0.39113	0.016518	0.81175	0.00841557	0.535096	-0.0130694	1	-0.00340582	0.19264	0.0211457	1	0.000924828
DHRS1	0.555579	0.0100551	0.720866	0.00756634	2.22619e-07	-0.0575562	0.593137	0.0119916	0.994427	-0.0044004	1	-0.00341814	0.39205	-0.0159919	1	0.00310846	0.884437	-0.00591352	0.00543561	0.03474
NCAN	0.28135	-0.0156777	0.000158886	-0.0442987	6.08183e-08	-0.059996	0.542239	-0.012847	0.00209459	0.0392387	0.247843	-0.0197979	0.778489	0.0083686	0.866487	-0.00680548	0.236983	-0.0198094	0.932897	-0.00478239
TMEM161A	0.820418	-0.0054647	0.809069	0.00596779	0.041029	-0.0254272	0.55315	0.0126563	0.682565	0.0110242	0.642529	0.0117647	1	0.00155357	1	-0.00148911	0.196787	-0.0210103	0.942472	-0.00453401
ARMC6	0.0254972	0.0279069	0.000469734	0.0414602	2.40232e-09	0.0656916	0.249382	-0.0189588	0.907023	-0.0066715	0.238922	0.0200529	0.777633	0.00838002	0.0843269	-0.0256307	0.876588	-0.00610682	0.207338	-0.0189933
BORCS8	0.393196	-0.013197	0.0608756	0.0249032	0.922955	-0.00382613	0.113252	0.0234659	1	-0.00403338	0.516664	0.0141325	0.907663	-0.00565299	1	0.00121958	0.970496	0.00385548	0.000141052	0.0452448
SLC25A42	0.745435	0.00673952	0.674633	0.00842128	0.641811	0.00872107	0.695332	0.010182	1	0.000460738	0.968828	0.00469224	0.805916	0.0078277	0.561237	0.0127024	0.977392	0.00369287	0.774075	0.00769723
SNX9	0.871539	0.00461902	0.198785	-0.0186266	0.0129101	0.0299571	0.0358373	0.0287114	0.0145889	0.0330164	0.770797	-0.0092828	0.00708331	-0.035268	0.0763624	-0.0261226	0.00588915	0.0361858	0.469213	0.0131286
RANBP3	0.409925	-0.0128479	0.916337	0.00398809	2.22531e-08	0.0618152	0.234745	-0.0193272	0.421615	-0.015898	0.315632	0.0181473	0.801761	-0.00792215	1	-0.00119311	0.995048	0.00325827	0.787602	-0.00745788
NDUFA11	5.99429e-08	-0.0605034	0.158993	0.0199724	0.12887	0.0200313	1	0.0030792	0.675514	0.0111422	0.0233264	-0.0312732	0.323298	0.0175586	0.75742	-0.00898111	0.233793	0.0199034	9.15909e-09	0.0650381
BMP8B	0.812306	-0.00559745	0.0766899	-0.0238113	0.00517267	-0.0331241	0.619387	0.0115298	0.645788	0.0116572	1	-0.00238841	0.108547	-0.0243172	0.95185	-0.00479377	0.946729	0.00448969	0.977028	0.00374237
NR2F6	4.7911e-07	0.0565556	5.87628e-87	0.207287	1.11665e-32	0.12691	1.58867e-42	0.145899	1.33004e-45	0.151319	3.25257e-40	-0.14259	1.06074e-41	0.144736	2.09244e-48	-0.156156	1.0375e-09	0.0696582	0.184531	-0.019684
USE1	0.0534345	-0.0248004	0.204679	-0.0184488	0.444634	0.0121148	0.628282	0.0113761	1	0.00114504	0.312132	-0.0182232	0.379704	0.0162678	0.105954	-0.0244814	0.577139	0.0121818	0.569761	0.0112972
OCEL1	0.998398	0.00236392	1	-0.00198596	0.0455654	0.0249819	1	-0.00288315	0.575447	0.0129259	0.985283	-0.00421101	0.613702	0.0115817	0.0931738	-0.0251371	0.418754	-0.0153843	0.938973	0.00461938
DYRK1B	1	-0.00140211	0.357145	-0.0145703	7.36968e-13	-0.078103	1	-0.000247278	0.000611765	0.0427052	0.707989	-0.0104832	0.348136	-0.0169589	0.255562	-0.01935	0.954092	-0.004303	0.0364271	0.0276806
BRAF	0.725493	-0.00708508	0.000585219	-0.0408555	3.86429e-10	-0.0687055	1.5431e-08	-0.0644039	0.000365988	-0.0440688	0.446446	-0.0154093	0.213177	-0.0204242	0.00942502	-0.0343955	0.0915225	-0.0253302	1.57485e-05	0.0504944
NDUFB2	0.000931274	0.038958	0.00401582	0.0351368	0.000231109	0.0421704	1	0.00100108	0.819781	-0.00845287	0.934719	-0.0055928	0.949783	-0.00466762	0.971231	-0.00429993	0.482213	0.0140833	0.0146576	0.0312651
HLTF	0.154364	-0.019457	0.90493	-0.00418424	0.00697654	0.0321233	0.0728612	-0.0256262	0.774019	-0.00929464	0.232956	-0.0202143	0.740972	-0.00913427	0.640013	-0.0112348	0.731742	-0.00912387	1.64812e-11	0.0751553
PRPF6	0.037094	-0.0263888	0.00104083	0.0392416	0.000211355	0.0424065	0.766995	-0.00885083	0.280727	0.0189352	1	0.000704388	1	6.84558e-05	0.0876242	-0.0254429	0.53635	0.0129955	0.765895	-0.00784455
RGS19	1.97905e-08	-0.0625007	0.235718	-0.0175447	0.000443267	0.0404384	0.985407	-0.00407118	0.0881912	-0.0255695	1.86341e-06	0.0562521	0.0230572	-0.0311173	0.728653	0.00952579	0.445614	-0.0148005	0.634554	0.0101681
RGS20	1.7294e-21	-0.102601	5.08597e-16	-0.0885016	0.0364386	0.0259247	1	0.00339198	1	-0.00265181	0.0059324	-0.0361665	0.0263139	0.0306072	0.0778484	-0.0260242	1.76831e-05	-0.0515379	0.303705	0.0165217
ABHD3	0.688138	-0.00770969	0.63592	0.0091328	0.00113129	-0.0378215	0.46088	0.0143398	1	-0.000456563	1	-0.00250755	0.962841	0.0043696	0.898816	0.00613055	0.748513	-0.00874697	0.518896	0.0122163
SNRPD1	1	0.000422609	1	-0.0006153	5.95428e-87	0.207149	0.0132383	-0.0325076	0.631592	-0.011884	0.576217	0.0130077	0.038809	0.0290512	0.384326	0.0162712	0.00212243	0.0393692	3.76453e-12	-0.077304
TCHP	2.14038e-22	0.104801	2.2024e-24	-0.109787	3.66725e-09	0.0649723	8.66504e-12	0.0762656	2.1108e-53	0.16365	2.846e-17	-0.093437	1	-0.00331424	0.605102	0.0118887	0.0469875	-0.0284065	2.71e-08	-0.0631473
TIAM1	1.96036e-11	0.0737472	2.14831e-20	0.100223	5.66737e-26	0.112862	0.495875	-0.0137014	1	0.000238033	0.620019	0.0121804	8.86954e-18	-0.0944373	0.00273449	-0.0384424	0.997986	0.00318704	0.258872	-0.0176108
TSC2	0.53543	-0.0104135	0.630039	-0.00924597	0.234292	-0.0166348	0.784839	0.00852825	1	0.00180155	0.960188	-0.0049575	1	0.0017949	0.608905	-0.0118088	1	-0.000162185	0.198282	0.0192645
RPL3L	0.481104	-0.0114329	0.546472	-0.0107766	1	0.00208052	0.813455	-0.0079912	0.922667	-0.00632387	1	0.00108433	0.48846	-0.0140287	0.799565	-0.00814821	0.930665	0.00487878	0.75789	-0.00798047
SLC9A3R2	0.000593473	-0.0402297	0.765439	0.006746	1.26931e-09	-0.0667603	0.354523	0.0165118	0.000220014	0.0453799	0.680432	0.0110023	0.02827	-0.0303289	0.00714176	-0.0353729	0.62222	0.0113143	1.19768e-07	0.0604365
PUF60	1.38253e-05	0.04954	0.00401053	0.0351413	0.167391	0.0186114	0.150209	0.0219684	4.81833e-09	0.0668637	0.0067405	-0.0357391	0.000257546	0.0448736	0.755189	-0.00902546	0.834202	0.0070341	8.7659e-05	-0.0464398
GOLGA2	0.0743973	0.0232555	0.13471	0.0209029	3.81726e-06	-0.0518037	0.0209409	0.0308	0.78165	0.00915485	0.772138	-0.009246	1	-0.000623687	0.41405	-0.015637	1	-0.00192112	0.104864	0.0228119
UCK1	7.13722e-05	-0.045716	0.888785	-0.00450304	0.878867	0.00465098	1	-0.00101515	0.512891	0.0141313	0.176118	-0.0218833	1	-0.00132075	0.409238	-0.0157285	0.804484	-0.00765151	0.690625	0.00919767
SCIN	0.349069	-0.0141259	0.426371	0.0131368	4.43051e-35	-0.131571	0.284989	0.0180576	0.37226	0.0168912	0.805205	0.00854065	1	-0.00024289	0.66146	0.0108297	0.797068	0.00778545	0.556234	0.0115307
IKZF4	2.02339e-09	-0.0664284	0.000998262	0.0393603	0.0463101	-0.0249071	0.389016	-0.0157869	0.972877	-0.0049639	0.997296	-0.00390704	1	0.00100703	0.645662	-0.0111367	0.183909	0.0214332	1	0.00168752
MIEN1	0.239428	0.0167503	0.00116036	0.0389249	2.72876e-16	0.0885415	1	0.00303784	0.508183	-0.0142308	8.96981e-05	0.0477581	1	-0.00204732	1	0.00176077	0.828914	-0.00714427	6.2849e-07	0.0572698
PON1	3.60182e-05	-0.0473458	0.296043	-0.0159764	2.61801e-05	-0.0475193	1	-0.00259453	1	-2.484e-05	0.967574	-0.00474141	0.580231	0.0122218	0.0872846	0.0254607	1	0.000160307	0.800244	0.0072458
AXL	0.00395965	-0.0345506	0.194947	-0.0187463	0.863248	0.00493802	0.686768	0.0103284	0.754861	0.00964938	0.995331	-0.00397432	0.824462	-0.00746113	0.709718	0.0098802	0.698112	0.00981654	0.868488	0.00605985
TGFB1	0.0147533	-0.0300242	0.926634	-0.00378935	3.03184e-05	-0.0471766	0.83373	-0.00758149	1	-0.000185824	0.902915	0.00638849	0.920563	-0.00537142	0.843309	0.00730908	0.671898	-0.010331	1	-0.00153861
CCDC97	0.5061	-0.0109547	0.0619139	0.024826	0.459761	-0.0118344	1	0.00361087	0.331129	0.0177635	0.953387	0.00514179	0.799614	0.0079703	0.786633	0.00841693	0.262194	-0.0191057	0.112431	0.0224467
ZFP40	1	-0.00034223	2.55993e-05	0.048711	0.987539	0.00249832	0.169935	-0.0212636	0.823341	-0.00835797	0.970387	-0.00464971	0.31296	0.0177967	0.48768	0.0141421	0.956592	-0.00423188	0.513277	0.0123256
AKAP8L	1.61685e-05	0.0491901	0.503474	0.0116244	0.0998083	-0.021343	0.940235	0.00517421	0.775898	0.00926721	0.973726	0.0045498	0.322138	-0.0175862	0.888913	-0.00636562	0.342433	0.0170995	0.430546	0.0138492
SHH	4.25919e-13	-0.079277	1.58857e-06	0.0546906	0	-0.765293	3.47151e-16	0.0897216	6.11837e-15	0.0865719	0.0418011	0.0289443	0.000138429	0.0464097	2.58157e-12	0.0785665	0.0362594	0.0295316	3.18132e-12	0.0775501
PDCD2L	0.615905	0.00898718	0.387278	-0.0139307	0.00220768	0.0358315	0.676814	-0.0105138	0.40433	-0.016255	0.0114913	0.0339126	1	0.00300051	1	0.00176127	0.994183	0.0032768	0.382716	-0.0148021
GTF2F1	0.0018416	-0.0369341	0.182011	0.019163	1.03697e-13	0.08083	0.385816	0.0158504	0.411126	0.016115	0.130851	0.0235438	0.846823	-0.00700513	0.707898	0.00992338	0.287485	0.018465	0.95972	0.00418964
CLPP	3.9809e-05	-0.0471129	0.885793	-0.00455856	2.75518e-51	0.15935	0.230132	-0.0194652	1	-0.00116802	0.161345	0.022383	0.961337	-0.0044017	0.616066	-0.0116792	0.00169316	0.0400275	2.77435e-06	-0.0542549
ALKBH7	2.22127e-11	-0.0735604	0.00250852	0.036625	0.00114425	0.0377879	0.101349	0.0240295	0.410937	0.0161229	0.765105	0.0093887	1	-0.000197328	0.616623	-0.0116688	0.308644	-0.0179209	0.0305647	0.0284081
DENND1C	1	0.00164239	0.531362	0.0110789	0.106784	-0.0210038	1	0.00119486	0.241412	0.0199329	1	-0.00195974	0.496684	0.0138649	0.95185	-0.00478767	1	-0.000922215	0.576692	0.0111741
MED6	0.925649	0.00368753	0.569984	-0.0103515	0.000148242	0.0433112	0.210745	0.0199947	0.0244249	0.031123	0.411142	0.0160768	0.892805	0.00599653	0.964641	-0.00448023	1	-0.00218085	0.137218	-0.0213869
PRKD1	1.65971e-11	-0.0740045	1.1201e-08	-0.0640209	0.124095	-0.0202278	1	0.00176214	0.736239	-0.0100584	0.227474	0.0203579	1	-0.00312942	3.3031e-08	-0.0637029	0.000278766	-0.0449831	0.0339706	0.0279808
LCP2	0.905925	-0.0040168	0.99766	0.00238296	0.0143754	-0.0295626	0.982162	0.00415085	1	0.0041682	1	0.00151409	0.974031	0.00411067	0.562614	0.0126837	0.756405	0.00857654	1	9.98364e-05
CSE1L	0.00155646	-0.037444	0.236164	0.0175311	2.40534e-32	0.12625	0.690649	-0.0102647	0.065227	-0.0269886	0.796204	0.00873982	0.739403	-0.00916684	0.875424	-0.00661992	1.42535e-05	0.0520181	0.0181733	-0.0304582
NAA20	2.71558e-23	-0.106937	5.14825e-09	0.0653444	4.46285e-12	0.0755247	0.910103	0.00593918	0.167502	0.0221861	0.80893	0.00847402	0.810012	0.00775366	0.317517	-0.0178102	6.61861e-05	0.0485165	0.0201832	-0.0300722
PRKRA	0.24028	0.0167275	0.881916	-0.0046332	0.00213936	-0.0359293	0.587511	0.0120852	0.000173749	-0.0459696	0.366459	0.0170026	0.504737	0.0136921	5.39971e-09	-0.066801	1	-3.01651e-05	2.62854e-11	0.0744553
FKBP7	0.242649	0.0166645	0.56908	0.0103692	0.799748	0.00606825	0.58778	0.0120776	1	-0.00388968	0.200096	0.0211472	0.915135	0.00548541	0.349092	-0.017088	0.976876	-0.00371255	0.623575	0.0103643
PLEKHA3	2.9376e-08	0.0617962	0.801009	0.00610846	4.81469e-06	0.0513018	0.973268	0.00439297	0.0362896	-0.0295125	1.74737e-07	0.0608481	0.1768	-0.0216181	0.184214	-0.0213923	0.346032	0.0170183	0.921563	0.00500516
YKT6	0.575985	-0.00968711	1	-0.000650608	0.0268233	0.0271749	0.824784	0.00777759	0.984254	-0.00469319	1	-0.000813353	0.883951	-0.00621181	0.562963	-0.0126756	0.181288	-0.0215288	0.712131	0.0088127
BAZ1B	0.0024053	-0.0361269	0.138717	-0.0207383	7.45918e-08	0.0596158	0.102939	-0.0239499	0.580658	-0.0128273	1	-0.00269636	0.544032	-0.0129071	0.00792169	0.0350179	0.315425	0.0177366	0.201897	-0.0191518
PEX6	0.326594	-0.014622	0.341839	0.0149209	0.522462	-0.010744	0.601752	0.0118437	0.859944	0.00763622	0.524399	-0.0139801	0.944412	0.00481232	0.879062	0.00654222	0.58784	-0.011974	0.295012	0.01672
MRPL2	0.0101495	-0.0313754	0.268238	0.0166459	2.17581e-17	0.0916333	0.881375	-0.00651876	0.994825	-0.00437456	0.991546	0.00405802	0.222094	0.020154	1	-0.00345168	0.0288602	0.030449	0.634766	-0.0101633
MEA1	2.44506e-06	-0.0532589	1	-0.000926511	0.00189256	-0.0362996	0.028806	0.0295954	0.979223	0.00482209	0.49184	0.0145881	0.00898673	0.0344841	0.0869284	-0.0254813	0.120316	-0.0238932	1.5626e-05	0.0505139
GNMT	0.0127812	-0.0305469	0.993223	0.00247204	1	-0.000980137	1	-0.00280927	1	-0.00205317	0.331077	0.0177895	0.0867506	-0.0254318	0.962264	0.00453401	1	0.00259714	0.735914	-0.00839088
GRIN2D	0.579047	-0.00963511	1	0.001486	0.648909	-0.008605	1	0.00193082	0.799588	-0.00884078	0.579026	0.0129495	0.528318	-0.0132135	0.428766	-0.0153069	0.962844	-0.00403199	0.289303	0.0168523
KDELR1	1.81413e-18	0.0948745	0.147851	0.0203856	1.45777e-21	-0.102504	0.463054	0.014298	0.841818	0.00796427	0.0180343	-0.0322375	0.403593	-0.0157542	0.00592538	-0.0359728	1	0.00257075	0.0198326	0.0301384
TMEM143	0.191817	-0.0181707	0.641857	0.00902763	0.65448	-0.00851819	0.400833	-0.0155524	0.985032	0.00465773	0.228273	-0.0203366	0.938562	-0.00495985	1	-0.00300565	0.881598	0.00600419	0.321123	-0.0161274
GGCT	4.62166e-13	0.0791619	3.75224e-30	0.122253	1	-0.00176466	0.197648	0.020389	0.0131233	-0.0333983	0.849996	0.00760905	2.65848e-14	0.0845247	0.0465466	0.0283333	0.336401	0.0172442	0.630653	-0.0102264
JAG2	0.000115906	-0.0445216	0.0732513	-0.0240293	0.466762	0.0117159	1	-0.000744668	0.994541	-0.00439111	1	-0.00208916	1	0.000151162	1	-0.00066381	0.53447	0.0130363	1	-0.00102969
BTBD6	0.166794	-0.0190039	0.212589	0.0182084	0.150298	0.0192079	0.971794	-0.00442271	0.767341	0.00940281	0.797532	0.00871476	0.986713	0.00373191	1	0.0030585	0.489055	-0.0139346	0.713527	0.00878945
NUDT14	2.29567e-06	-0.05339	0.152356	-0.0202139	0.243159	0.0164061	0.141601	0.0223031	1	-0.00326121	1	-0.000401305	0.196608	0.0209235	0.402959	-0.0158485	0.721098	-0.00936176	1.64507e-09	0.0679374
EPDR1	2.19108e-05	-0.0485012	0.664956	-0.00860588	0.346881	-0.0140209	0.458647	-0.0143799	0.731869	-0.010136	0.929377	-0.00575413	0.0332107	-0.0297077	1	-0.00203839	0.962056	-0.0040816	0.415265	-0.0141526
FLII	0.957192	0.00312418	0.42653	0.0131312	0.859847	-0.00500112	3.57377e-05	0.0490972	0.827883	0.00825207	0.499656	0.0144405	0.258369	-0.0191592	1	-0.00338652	0.897904	0.00561072	0.236212	0.0182012
TOP3A	0.0428424	0.0257658	1	0.000259765	0.0514274	0.024449	0.791724	-0.00839029	0.702118	0.010667	1	0.000363844	0.544204	0.0129017	0.525869	-0.0133902	0.867331	-0.00629742	1	-0.000872356
ATG4D	0.429565	0.0124474	0.0522559	0.0255819	0.95823	0.00311034	0.356899	-0.0164608	0.935737	0.00598305	0.148238	0.0228803	0.209215	-0.020536	0.0779002	0.0260171	0.585343	0.0120176	0.0349742	0.0278557
QTRT1	0.326165	-0.0146338	0.106946	-0.0221345	5.7143e-08	0.0601089	0.836679	-0.00751364	1	-0.002311	0.217747	0.0206232	0.794334	-0.00805761	0.347088	-0.0171473	0.18691	0.0213376	0.0696185	-0.0248179
PLIN4	0.890526	-0.00429048	0.719813	0.00758766	0.184815	-0.0180529	1	-0.00167373	1	0.000340886	0.914074	0.00614802	0.0412639	-0.0287814	0.860204	-0.00694602	1	-0.000718395	0.603655	0.0107177
HDGFRP2	0.0397556	-0.0260887	0.00537107	0.0341859	2.60444e-15	0.0857065	0.0148097	0.0320934	1	-0.00029453	0.925511	0.0058344	0.98574	0.00376454	0.987657	-0.00389604	0.752033	0.00866321	1	-0.00228087
CHAF1A	0.645028	0.00848651	0.796663	0.0061879	9.34331e-26	0.112372	0.236952	-0.0192655	0.186548	-0.0215614	0.945812	-0.00532044	0.767036	0.00862623	0.76301	0.00885	0.0117879	0.0338298	0.000199174	-0.0443609
ADPRH	1.09562e-51	0.160027	1.39487e-05	-0.050075	0.0010756	-0.0379696	0.359752	0.0164001	1	-0.00368679	0.116454	0.024174	3.34426e-10	-0.0710676	0.00371505	0.0374993	0.325712	0.0174634	0.446902	0.0135427
TMEM39A	0.139762	-0.020004	0.0577318	-0.0251396	0.00896082	-0.0312529	1	-0.00119145	0.992461	-0.00445826	0.553572	0.0134484	0.0784954	-0.0259164	1	0.00154682	0.968871	0.00389172	0.384684	0.0147517
TIMMDC1	0.20723	-0.0176882	0.00410819	0.0350621	0.000365372	0.0409626	0.678544	0.0104739	1	0.00197426	0.566485	0.0132022	0.0243741	-0.0309106	0.900702	-0.00607667	0.714508	-0.00948376	0.925613	-0.00492231
PLA1A	1	-0.00180818	0.914743	-0.00402144	0.00246602	-0.0354871	0.333512	0.0169566	0.930588	-0.00610673	0.684302	-0.010916	0.662914	0.0106563	0.955285	-0.00470158	0.829265	-0.00713083	1	0.00202997
MCM2	0.947005	0.00330334	0.0118215	0.0314944	0.00107512	0.0379713	0.454361	-0.014478	0.576406	0.012907	0.921876	-0.00594313	0.645768	0.0109614	1	-0.000954792	0.00313995	0.038189	0.0602817	-0.025493
TPRA1	0.856056	-0.00487419	0.182453	0.0191455	0.13519	-0.0197744	0.883046	0.00648176	1	-0.00145701	0.964755	-0.00482537	1	-0.00180684	0.118491	-0.0238991	0.863974	-0.006369	0.13292	0.0215526
NAB1	5.49014e-68	0.183416	1.08706e-132	-0.254809	0.285781	-0.0153706	5.84181e-72	0.189301	2.00766e-36	0.135365	9.77861e-37	-0.136306	0.11242	-0.0241488	0.0421405	-0.0287649	0.0470199	-0.0284007	0.031693	0.0282623
ADGRE5	0.53117	-0.0104938	0.700974	0.00794375	0.523025	0.0107314	1	-0.000892751	1	-0.00138492	1	-0.00335628	1	0.000849226	0.69928	-0.0100858	1	-8.11116e-06	1	-0.000278278
IL17RA	0.185686	-0.018374	0.0799029	0.0236115	0.318913	0.014623	0.769353	0.00880565	1	0.00163758	0.166629	-0.0222053	6.43165e-13	0.0802515	0.0415191	-0.0288324	0.245665	-0.0195686	3.22857e-09	0.0668225
LAMB1	2.10508e-19	-0.0973334	4.04793e-15	-0.0858825	7.74285e-05	-0.0449237	7.96043e-15	0.085798	0.959366	-0.00536242	0.0570474	-0.0275923	0.00889452	0.0345243	0.13092	-0.0233567	0.0135981	-0.0332994	6.30126e-52	0.161297
KCNN1	0.694025	-0.00760441	0.635398	0.00914615	0.000170363	-0.0429544	0.916949	-0.00576247	0.0671981	0.0268513	0.684801	-0.0109017	1	-0.00111184	0.0117081	0.0336452	0.436191	0.0149866	1	-0.000960123
ARRDC2	0.331019	-0.0145254	0.636575	-0.00911681	0.441597	0.0121703	0.933962	-0.00531677	0.446895	0.0153613	1	-0.00169139	0.500905	0.0137771	1	-0.00290886	0.0469875	0.0284073	1	-0.00172547
PPP1R17	0.38235	0.0134253	0.576657	0.0102174	0.0335614	-0.0262679	0.0210475	0.0307787	0.942976	0.0058226	0.590345	0.0127259	0.0543852	-0.0276057	0.838151	-0.00740307	0.00718585	-0.0355478	0.130568	0.0216483
CD36	0.0156484	0.0298055	1	0.00154721	1.55313e-38	-0.137991	0.385011	0.0158667	1.65889e-07	0.0606664	0.914593	0.00613636	0.0120136	-0.0334899	1.69059e-15	-0.0883275	0.00389324	-0.0375032	0.545512	0.0117306
MAP2K7	0.629317	-0.00876225	0.259074	-0.0168981	0.491924	-0.0112805	1	0.00361388	0.0409977	0.0290072	0.936433	0.00554693	0.870236	0.00655542	0.734839	0.0094082	0.680161	0.0101463	1	0.000626637
TIMM44	1	0.00131352	0.16933	0.019605	0.00277601	0.0351142	0.944171	0.00510753	1	0.00158216	1	-0.00201803	0.362772	-0.0166369	1	-0.0029767	0.122959	0.0237811	0.0013399	-0.0390981
AP2A2	0.0629122	0.0240419	0.214491	0.0181561	0.952477	0.00322623	0.217401	0.0198086	0.682391	0.0110317	1	-0.00270803	0.337973	-0.0171985	1	-0.00100541	0.180356	0.0215663	0.05265	-0.0261045
PNKP	0.212889	-0.0175143	0.569269	0.0103652	0.0237059	0.0276629	0.988654	-0.00397452	0.847459	-0.00784657	0.864591	-0.00727925	0.89256	0.00600079	1	0.00286066	0.265309	0.0190298	1	0.00260242
MED25	0.15105	-0.0195809	7.65172e-43	0.145897	0.771294	-0.00655124	1.7137e-21	0.103595	8.11041e-12	0.0767871	0.487891	0.0146603	0.658392	0.0107385	0.825728	-0.00763891	1	0.0010469	0.431565	-0.0138285
BCAM	5.98226e-19	-0.0961487	5.79711e-21	0.101641	0.221908	0.0169669	0.0015698	0.0393536	0.129984	0.0235931	0.000760271	-0.0422751	8.6353e-12	0.0765801	0.0251537	-0.0308504	1.51643e-19	-0.099539	3.02337e-35	0.133015
CLPTM1	0.223403	0.0172035	0.120299	0.0215137	0.811127	0.00586801	0.936824	0.0052463	1	-0.00207371	0.490854	0.0146091	0.943013	-0.00484188	1	-0.000633901	1	0.00155841	0.874905	-0.00594809
RELB	0.309056	0.0150212	1	0.00155226	0.154893	-0.0190425	0.979463	-0.00424382	0.55625	0.0132849	0.841568	0.00779246	0.287409	0.0184319	0.702529	0.0100277	0.773975	0.00822952	0.644099	0.0100168
TOMM40	0.000967029	-0.0388452	1.53407e-08	0.0634682	1.46547e-59	0.171713	0.152908	0.0218606	0.714799	0.0104308	2.16946e-06	0.055944	0.856006	-0.00684075	0.546236	-0.0129863	4.27684e-05	0.0495543	3.17353e-12	-0.0775551
APOE	4.016e-10	-0.0690745	0.138697	0.0207407	0.639989	0.00875233	1.34938e-25	-0.113173	3.07822e-14	-0.0844636	0.00595462	-0.0361546	0.596476	0.0119473	7.93756e-07	-0.0577958	1.88998e-13	-0.0823495	1.5503e-19	0.0987897
APOC2	1		1		1		1		1		1		1		1		1		1
HBP1	7.61221e-13	0.0784652	1	-0.000466158	1.58563e-73	-0.190676	0.426145	0.0150373	1.25341e-07	0.0611855	0.0350434	-0.0296589	0.200107	0.0208203	0.878928	-0.00654545	0.00299814	-0.0383351	6.36439e-11	0.0731219
PRKAR2B	1.03223e-56	0.167611	1.11489e-173	0.290083	0.926833	-0.00373207	1.94227e-23	0.108243	1.66099e-49	0.157616	3.39757e-10	0.071441	1	0.00155302	3.78493e-18	0.0957068	0.00131081	0.0407697	4.44653e-24	-0.109875
CDKN1B	4.78276e-12	0.0758384	0.669109	0.00852653	9.32015e-23	-0.105411	0.145684	-0.0221411	0.00504431	0.0365841	0.000614996	-0.0428549	0.000140459	-0.0463738	0.0168038	0.0323497	0.247973	-0.0195034	0.111844	0.0224781
KLF4	0.937352	0.00346983	4.78513e-06	0.052394	0.00322873	-0.0346404	0.00836802	0.0340983	0.0164093	0.0325994	0.119812	0.02401	0.0771564	-0.0259936	0.926731	0.00547581	0.0256335	-0.0309037	0.0387865	0.0274239
AP1M1	1.06931e-05	0.0501092	0.00105604	0.0391993	0.0173307	-0.0288664	0.605504	0.0117754	0.909789	0.00662663	1	0.000137972	1	0.000336633	0.0150618	-0.0327377	1	-0.000698175	1	-0.00106541
RAB8A	0.643966	-0.00850741	0.485794	0.0119837	0.0106353	0.0306548	0.932471	-0.00537164	0.984254	0.00469057	0.0463617	-0.0284982	0.955628	-0.00452655	0.696316	-0.0101324	0.985347	0.00350917	1	0.00225283
HMGN2	0.184941	0.0184013	0.0804199	0.02358	1.1892e-28	0.118673	0.433906	-0.0148868	0.000551031	0.0429909	1	-0.00183455	0.2579	0.0191703	9.16631e-05	0.0476479	1	0.00271334	8.50652e-07	-0.0566753
FAM32A	0.00585034	-0.0332771	0.601633	0.00976956	0.050963	-0.0244917	0.77576	0.00869965	1	0.00361632	0.967627	0.00473895	0.204152	0.0206913	1	0.000351186	1	0.00164741	0.981665	0.00363284
ELF3	0.0142947	-0.030139	0.794707	-0.00622984	0.214803	0.0171652	1	0.000875108	0.927548	0.00620599	1	0.00208742	1	-0.000743239	0.536043	-0.0131903	0.29599	-0.0182399	0.00447457	0.0353781
STARD3NL	0.15741	0.0193426	3.57234e-07	0.0576484	0.259326	-0.0160002	0.758393	-0.00901862	0.375093	0.0168341	0.750287	-0.00968355	0.0667682	-0.026669	0.897101	0.00616638	0.534953	-0.0130252	0.002427	0.0373095
STK11	0.814874	0.00555698	0.0209253	0.0293599	0.121774	0.0203281	0.250926	-0.0189187	0.710762	0.0105187	1	-0.000417938	0.696478	-0.0100085	0.421927	0.0154539	0.29823	0.0181811	0.721876	-0.00863687
EFNA2	2.5375e-09	-0.0660491	0	0.418863	1.93685e-21	0.102198	6.35157e-101	0.223436	2.66698e-69	0.186058	7.05361e-31	0.125051	0.00202843	-0.0391954	3.41248e-30	0.123503	6.99663e-18	-0.0951898	1.18322e-11	0.0756391
ATP5D	0.543087	0.0102697	8.43566e-08	0.0603898	1	0.00197844	0.0045828	0.0360753	0.690599	0.0108755	0.184965	-0.0216076	0.767097	-0.00862324	1	0.00207179	0.0133859	0.0333677	0.960894	0.00415941
PPP5C	0.638534	-0.00859532	1	0.000237753	0.000142639	0.0434106	1	-0.00134994	0.919091	-0.00639018	5.57334e-06	0.0540047	0.398807	-0.0158547	1	0.000309875	0.190214	0.0212323	0.196701	-0.0193118
CDK12	0.484511	-0.0113565	0.0659281	0.0245308	0.286661	0.0153487	0.727734	0.00957547	0.0839474	0.0258247	0.764765	0.0093947	0.586188	-0.0121276	0.760043	-0.0089188	0.832947	0.00705348	0.365048	-0.0151665
LIPE	0.528975	-0.0105388	0.00158103	0.038033	0.195959	0.017718	0.954779	-0.00482179	1	-0.00211909	0.666785	0.0112745	0.540093	0.0129838	1	0.00218858	0.87216	0.0061954	1	-0.000148684
PAFAH1B2	0.528727	0.0105436	0.00810842	-0.0328054	1.43636e-08	0.062599	0.823067	0.00781518	0.456326	0.0151781	0.30571	0.0183579	0.272332	0.0188167	1	0.000981078	0.985665	-0.00350276	0.77631	-0.00766102
TBC1D8	0.895669	0.00419963	0.622057	0.00938729	0.116923	-0.0205443	0.743336	0.00930842	0.730664	0.0101588	0.931974	-0.00567061	0.994572	-0.00354024	0.474045	-0.0143933	0.403192	0.0157304	0.136192	0.0214273
CNOT11	0.00164436	-0.0372804	0.00068521	-0.040422	0.000969218	0.0382629	0.82737	-0.00771614	0.678748	0.0110861	0.16426	0.022281	0.999438	-0.00340476	0.312872	0.0179347	0.903997	0.00548339	0.935937	0.00470328
SLC2A3	7.5936e-05	0.0455686	1.20262e-23	-0.108084	2.74877e-67	0.182469	0.312263	-0.01743	0.000119014	0.0469016	1	0.00373604	2.40462e-139	-0.261398	4.84195e-09	0.0669865	0.163104	-0.0221877	0.0270341	-0.0289212
FOXJ2	0.163972	0.0191082	0.33617	-0.0150516	0.934563	-0.00357346	0.131089	0.0227192	0.394777	0.0164432	0.365229	-0.0170281	1	0.00176329	1	-0.00235504	0.73282	-0.00909895	0.00402253	0.0357192
SRI	2.03832e-20	-0.0999281	0.00366407	-0.0354295	2.38084e-25	-0.111462	9.12022e-21	0.10182	0.0934535	-0.0253012	0.200827	0.0211232	0.720771	-0.00953957	0.188873	0.0212516	0.00238111	-0.0390252	0.649037	0.00993344
DGCR2	1.33087e-05	0.049625	0.0721824	0.0240956	0.985387	0.00253547	1	-0.00174235	0.160362	0.0224373	0.761763	-0.0094564	0.131403	-0.0233124	0.625533	0.0115301	0.962844	-0.00402897	0.140577	-0.021256
IRF3	0.0726403	-0.0233772	0.884819	-0.0045803	0.396951	-0.0130344	0.980917	0.00420877	0.931334	0.00608739	0.577194	-0.0129867	0.589076	0.0120756	0.659721	0.0108608	1	0.00288052	1	0.002931
BCL2L12	0.572819	0.0097432	0.217162	0.0180756	0.431944	0.0123478	1	0.0029993	0.42695	-0.0157757	0.489552	-0.0146332	0.170003	0.0218622	0.673917	0.0106219	0.307296	0.0179538	0.534705	0.0119391
ZFP959	0.240362	-0.0167233	0.955425	-0.00320345	0.0321418	0.0264481	0.016452	0.0316942	0.386013	-0.0166154	0.000538644	-0.0432043	0.193579	0.0210207	0.204375	-0.0207642	0.221958	-0.0202653	0.00125683	0.0392948
MPND	1	-0.00164196	0.000898546	-0.0396605	1.17787e-13	-0.0806572	0.695462	0.0101775	1	0.00221218	0.00239636	-0.0389773	0.0116151	0.0336109	1	0.00219756	0.0327208	-0.0299461	0.879629	-0.00585876
SH3GL1	1	0.00111494	0.637334	-0.00909999	0.740289	0.00709706	1	0.000721037	1	0.00250797	0.974072	0.00453278	0.289194	-0.0183864	1	-0.00197502	0.569196	0.012355	0.365195	0.0151606
EBI3	0.882936	0.00442778	0.00125917	0.0386906	1	0.000292174	0.756801	0.00905343	1	-0.000788842	0.638206	-0.0118433	0.81037	0.00774565	0.437829	0.015126	0.648583	-0.010812	0.0363469	-0.0276899
CCDC94	0.285663	0.0155742	0.0457977	0.026157	0.962353	0.00303545	0.733195	-0.00947624	1	-0.00380841	1	-0.000770093	0.967787	0.00425685	0.926731	-0.00548142	0.327838	0.0174172	0.687525	-0.00926619
RANBP2	0.119967	0.0208441	0.944774	-0.00342189	5.69659e-06	0.0509389	0.776396	-0.00868171	0.416478	-0.016004	0.923512	-0.00588904	0.175262	-0.0216702	1	-0.00354119	0.710234	0.00957863	0.755233	0.00803006
EDAR	9.87576e-05	-0.0449258	0.854931	-0.00512252	6.23049e-07	-0.0555434	0.0232169	0.0304026	0.337425	0.0176351	0.543023	0.0136445	0.0564252	-0.0274302	0.00826585	0.0348699	9.61716e-07	0.0575585	0.33101	-0.0159142
GRK5	0.750706	-0.00664082	0.000154835	-0.0443653	0.546751	0.0103121	0.0856656	-0.0248724	1	0.00127685	0.845479	-0.00771338	0.610435	0.0116437	0.489303	-0.0141016	0.19986	-0.0209164	0.860489	0.00620925
DVL3	0.00600702	0.0331874	0.466037	0.012367	2.55881e-14	-0.0827228	0.692133	0.0102336	0.517513	0.014027	1	0.00347308	1	-0.00266557	0.156598	-0.0223263	0.722797	0.00932205	0.160293	0.0205203
ABCF3	0.192325	-0.0181542	0.368153	0.0143417	0.427015	0.0124396	0.902309	0.00608772	0.471098	0.0149067	0.493375	0.0145546	0.91912	-0.00540727	0.528913	-0.013337	0.608563	-0.0115865	0.595752	-0.0108531
EIF2B5	0.000102296	-0.0448398	0.144185	0.0205283	0.000399269	0.040722	0.00146834	0.0395504	0.50455	0.0142977	1	-0.00262383	1	0.00257083	0.891719	-0.00631322	0.0546568	0.0277534	1.52108e-05	-0.0505775
CYTH2	0.738657	-0.00686421	1.53634e-13	0.081078	1.24258e-05	-0.0492193	0.00452477	0.0361207	0.0146606	0.0330002	4.87042e-05	0.0491946	0.495284	0.0138948	0.492418	0.0140243	0.289971	-0.0183921	3.85981e-13	0.0805115
SULT2B1	0.29142	-0.0154398	0.894825	0.00437143	0.00810117	-0.0316052	0.610643	-0.0116854	0.361647	0.0171033	1	-0.00347922	0.562074	0.0125821	1	0.00224439	0.876588	-0.00610622	4.65941e-12	0.0769995
CAR11	0.264844	-0.0160875	0.0224433	-0.0290948	0.382867	-0.0133087	0.00787775	0.0342946	1	-0.0017563	0.757841	0.00954426	0.801496	-0.00793122	0.0158344	-0.0325664	0.279873	-0.0186594	0.918082	0.00510262
DLGAP1	0.0023071	-0.0362562	0.91143	0.00407817	0.00144719	-0.0370959	0.000552047	0.0422931	1	0.00234215	0.23527	0.0201519	0.000275467	-0.0447003	1	-0.00137963	0.0106199	0.0342067	1	0.00048349
PLAG1	0.895938	-0.00419374	0.656577	0.00874939	0.0095903	-0.0310166	0.0629757	-0.0262937	1	0.0014804	0.0720871	-0.0265331	0.971872	0.0041622	0.199243	-0.020921	0.0871715	-0.0255636	0.342705	-0.0156561
HCK	0.211502	0.0175585	0.63259	-0.00919837	1.94047e-22	-0.104648	0.852072	0.00716111	2.95445e-11	0.0748812	0.600233	0.0125335	1.73623e-10	-0.072095	1.82365e-15	0.0882321	0.870545	0.00622968	1.56369e-29	-0.121741
MRPL4	0.00150856	0.0375363	0.00355428	0.0355306	0.0532596	0.0242901	0.939092	0.0051946	0.136939	0.023306	0.855894	-0.007467	0.866291	0.00663469	0.948051	-0.00492534	0.0615247	0.027218	1	-0.000705946
KEAP1	0.359245	-0.0139075	0.069644	-0.0242679	0.220107	0.0170195	0.0156096	0.0318941	0.310258	0.0182347	0.00941372	-0.0346075	1	-0.00222176	0.455105	0.0147845	1	-0.00200945	0.216449	-0.0187352
AP1M2	3.66304e-10	-0.0692251	0.0123129	-0.0313461	0.0680453	0.0231755	0.179891	-0.0209453	0.329139	-0.0178073	0.350614	-0.0173505	0.000373785	0.0439045	0.210594	-0.0205831	6.3529e-11	-0.0740113	0.00604026	0.0343876
GLG1	0.00521399	0.0336592	0.786012	-0.00638291	2.76104e-23	-0.106672	1	0.00314609	0.960269	0.00530096	0.274436	-0.0191158	0.515719	-0.0134595	0.88958	-0.00635724	0.191734	-0.0211788	0.383791	0.0147691
ATP8B3	0.475415	-0.0115418	0.0162676	-0.0303215	0.707655	-0.00765468	0.971727	0.00442694	0.700971	-0.0106853	0.528451	0.0139174	0.638096	-0.0111095	0.772127	-0.0086987	0.474592	0.0142237	0.264353	0.0174792
BTBD2	1.58957e-11	0.0740691	0.0484116	-0.0259155	0.0358834	-0.0259895	1	-0.00337275	1	0.00416928	0.00923215	-0.034674	1	0.000287003	0.596128	-0.0120581	0.938987	0.00465096	0.591944	0.0109172
CSNK1G2	0.0952241	0.0220396	0.0249072	-0.0286837	5.34374e-06	0.051079	0.111313	0.0235585	0.810541	-0.00864614	1	0.00352071	0.873522	-0.00646015	0.158483	-0.0222577	0.635299	0.0110472	0.163443	-0.0204019
ABHD17A	0.64605	0.00847011	0.0136492	0.0309811	0.0654484	0.023356	0.469515	0.0141927	0.501818	0.0143506	1	0.00130502	0.99793	-0.0034529	0.988586	-0.00387489	0.848411	0.00669977	0.999947	0.00320606
MOB3A	0.0509586	0.0250088	1	0.00153305	0.321935	-0.0145547	1	0.00358095	0.508699	-0.0142159	0.915777	-0.00610934	0.625884	-0.0113174	0.885871	0.00641634	0.0425993	-0.028834	5.86183e-05	0.0474315
CACNB3	0.820361	0.005467	5.49536e-75	0.192723	0.916817	0.00392503	6.63331e-33	0.128363	1.5128e-37	0.137432	1.53625e-06	0.0566418	0.220633	0.0202036	0.347138	0.0171454	2.98276e-06	-0.0552944	1.87764e-26	0.115198
CCDC65	0.910226	0.00393896	0.00040786	0.0418413	0.407598	-0.0128175	0.0478967	0.0274861	0.00318314	0.0379935	0.022248	0.0314539	0.291228	0.0183336	0.963937	0.00449731	0.0212367	-0.031648	5.51766e-05	0.0475762
FKBP11	1.98789e-33	-0.128557	1.31443e-23	0.107993	0.0835602	0.0222162	1.11754e-13	0.0823355	4.83867e-16	0.0897385	1.23328e-21	0.104667	0.867967	-0.00659735	7.01797e-11	0.0737173	0.409891	-0.0155741	0.95715	0.00424165
DDX23	0.120946	0.0208023	0.0103951	0.0319459	4.25632e-08	0.0606454	0.431486	-0.0149356	0.238737	0.0200177	0.949377	-0.00523134	0.955758	-0.00452382	0.839193	0.00738456	0.539645	0.0129352	0.427952	-0.0138983
PLD3	0.184286	0.0184218	0.115343	-0.02174	7.06921e-13	-0.0781608	0.0958549	0.0243116	0.0291856	0.030404	0.398228	-0.0163364	0.818773	-0.00757518	0.352104	-0.0170289	0.289785	-0.0184001	8.09782e-05	0.0466385
GRIK5	3.67556e-07	-0.0570774	0.0175472	0.0300372	0.532858	-0.010555	0.320278	0.017247	0.497955	-0.0144227	0.914178	0.00614522	0.40429	-0.0157388	0.948378	-0.00491414	0.363565	0.0166127	0.109735	-0.0225745
CD79A	0.941038	0.00340926	0.713791	-0.00770053	0.347872	-0.0140007	0.95635	-0.00478292	0.948285	0.00566083	0.859864	0.00738862	0.998016	0.00345065	0.952638	-0.00476716	0.599322	0.0117747	0.484703	0.01284
RABAC1	4.99135e-08	0.0608401	0.51256	-0.0114514	1.92429e-17	-0.0917801	0.0042373	0.036332	0.21397	0.0207425	0.399241	-0.0163173	0.2212	-0.0201826	0.0272018	-0.0305411	1	0.000810017	2.59224e-10	0.0709441
ETV3	0.598542	-0.00929218	0.757268	0.00690307	0.979239	-0.0026755	1	0.000686821	0.178359	0.0218354	0.829473	-0.00804205	0.908287	-0.00563886	0.579143	-0.0123653	0.998325	0.00316772	0.371223	0.0150367
PRKCSH	0.0263401	0.0277814	0.251755	0.0170968	2.71864e-07	-0.0571699	1	5.3338e-05	1	-0.0040412	0.730327	0.0100778	0.633903	-0.0111757	0.823353	-0.00768467	0.0936268	-0.0252167	0.720122	0.00867179
ELAVL3	3.6466e-12	-0.076237	0.010928	-0.0317719	0.000789599	-0.0388498	0.714617	0.00983211	0.831839	0.0081598	0.52412	0.0139871	0.348064	-0.0169636	4.72581e-27	0.1169	4.45288e-19	-0.0983241	0.161472	0.0204762
RAB3B	0.18879	-0.0182725	4.18958e-74	0.191589	0.968535	-0.00290722	6.77052e-22	0.104564	1.51138e-15	0.0883267	7.01182e-07	0.0581828	0.0211572	0.0314307	0.490042	0.0140848	6.67799e-20	-0.100444	0.888417	0.00571185
ST8SIA6	0.887942	0.00434508	0.169705	0.0195894	0.643684	0.00869309	1	0.000957764	0.469942	-0.0149345	0.644366	-0.0117194	0.163349	0.022095	0.0537123	-0.0277256	0.637784	0.0110132	0.961407	-0.00414312
FCGRT	0.823375	-0.00540814	0.00182605	0.0375973	5.69235e-05	-0.0456755	0.003973	0.03654	0.234494	0.0201375	0.180756	0.0217367	0.0558125	-0.0274839	0.595918	-0.0120617	0.0223288	-0.0314518	0.00284469	0.0368167
NOSIP	0.273363	-0.0158771	0.721304	0.00755864	0.0752418	0.022707	0.507147	0.0134859	0.256575	0.0195357	1	9.00746e-05	0.754246	0.008877	0.845085	0.00726472	1	0.0018741	0.403899	0.014374
PIH1D1	0.644328	0.00850183	3.81191e-05	-0.0477862	1	-0.00222782	0.123083	-0.0230285	0.786224	-0.0090738	0.938943	-0.00547132	0.697368	0.00999684	1	-0.00185386	0.443198	-0.0148471	0.717284	0.00872635
RPS11	2.82135e-08	0.0618685	0.0731698	-0.024037	0.414744	-0.0126766	0.000825159	-0.041191	1	-0.00377488	0.392447	0.0164636	0.3886	0.016064	0.00035387	0.0442567	0.491399	-0.0138888	0.54475	-0.0117438
SUPT5	0.28215	-0.0156549	0.117972	-0.0216215	0.000282505	0.0416417	0.661882	-0.0107818	0.72442	-0.0102664	0.683066	0.0109465	0.315019	-0.0177508	0.848531	-0.0071634	1	-0.00118252	0.918129	0.00509729
DLL3	0.602886	-0.00920548	6.93649e-28	0.11752	0.688992	-0.00796027	0.000249368	0.0444091	0.00644066	0.0358228	2.92388e-09	0.0679892	2.55148e-07	-0.0597303	9.99031e-06	0.0526627	3.83417e-15	-0.0874498	3.1423e-14	0.0839066
PAF1	0.945975	-0.00332863	1	-0.00101557	0.000305386	0.0414381	0.0465295	0.0276102	0.623534	0.0120381	1	0.00242051	1	-0.00197754	0.599977	-0.0119799	1	0.00197527	0.727427	-0.00853257
TIMM50	0.00610303	0.0331325	1	0.000892171	2.79812e-20	0.0992933	1	-0.00239552	0.0687304	0.0267543	0.656274	0.0114792	1	-0.000155199	1	-0.000665363	0.377888	0.016278	0.0112354	-0.0322516
MED29	4.589e-05	-0.0467736	0.00326267	0.0358038	2.31695e-12	0.0764755	1	0.00253851	0.582277	0.0127869	0.0821398	0.0259091	0.695552	0.0100278	0.549252	0.0129285	0.170664	0.0219081	0.552823	0.0115954
BICD1	5.67093e-12	-0.075587	1.84778e-10	-0.0707734	6.21046e-06	-0.0507542	0.484284	-0.0139126	0.0019125	0.039508	3.0527e-05	-0.0502627	0.00538866	-0.0361329	0.0256169	0.0307782	0.00971338	-0.0345194	1.91823e-06	-0.0550357
NCSTN	0.0105846	0.0312279	0.580921	0.0101397	3.72486e-13	-0.0790627	0.538752	0.0129157	0.902036	0.00679582	0.886877	-0.00681484	0.00276404	-0.0382453	0.917157	-0.00571818	0.312655	-0.0178167	0.0207154	0.0299732
PEX19	0.67739	0.00789361	0.479606	0.0121015	0.889975	-0.00445006	0.868244	0.0067982	0.912832	0.00652374	0.655635	0.0114928	0.950975	-0.00463159	0.389493	0.0161499	0.653868	0.0107083	0.485772	0.0128174
PHYHIP	0.00203251	-0.0366424	0.433372	0.012995	0.191718	0.0178456	1	0.00139851	1	-0.000598679	1	-0.00302375	0.734675	0.00927179	0.287475	-0.0185415	0.884374	-0.00593215	1	-0.000497742
CRHR2	1.72061e-15	-0.0865924	1.09051e-05	-0.050611	8.30173e-19	-0.0954706	0.699832	0.0100771	1	6.88561e-05	0.0117072	-0.0338387	3.83926e-22	0.105451	4.36806e-59	0.172277	0.558005	0.0125825	0.522337	-0.0121546
INMT	0.0367184	-0.026437	0.420489	-0.0132574	0.807543	0.00593175	1	-0.00161191	1	-0.000713838	1	0.00267252	0.666922	-0.0105602	1	-0.00320029	0.542006	0.0128893	0.847776	-0.00643154
CYP4F18	0.425035	-0.012547	1	0.00228114	0.708565	0.00763757	1	0.00130974	1	0.00152556	1	0.00288372	0.597135	-0.0119314	0.831051	-0.00755101	0.575074	0.0122257	0.718519	-0.00870336
IMPDH1	2.47387e-27	-0.116062	2.60596e-08	-0.0625198	0.0103753	0.0307423	0.193357	0.0205216	0.964512	-0.00518263	0.057957	0.0275194	0.00023157	-0.0451354	0.321952	0.0177079	0.707427	0.00962856	0.954175	-0.00430003
DUSP3	0.016647	-0.0295715	1.04885e-10	0.0716559	0.0069178	0.0321525	0.0777721	0.0253306	0.848026	0.0078379	0.883818	-0.00689208	0.000942157	0.0413902	0.706944	-0.00994338	0.558593	-0.0125713	0.917683	0.00511678
PRODH	0.453276	-0.0119755	0.0011029	0.0390745	1.05012e-12	0.0776045	0.956779	-0.00477279	0.61508	-0.0122078	2.68009e-05	0.0505766	0.221198	-0.0201835	0.673485	-0.0106311	0.00371662	0.0376457	1.84856e-09	-0.0677439
DGCR14	0.19555	-0.018049	0.104126	0.0222776	0.122934	0.020279	0.404225	0.0154804	0.23586	0.0200898	0.773979	0.00919748	0.635371	-0.0111528	0.877762	-0.006569	0.962608	-0.00404792	0.0494036	0.0263737
SLC25A1	0.719328	-0.00718211	1.05034e-19	0.0984709	0.00234433	0.0356457	1.87878e-16	0.0904664	0.000733117	0.0422145	2.28123e-05	0.0509412	0.0147871	-0.0327515	0.0833511	0.0256858	0.65612	0.0106636	0.678585	-0.00942466
DGCR6	0.0848147	-0.0226046	0.752249	0.00699698	0.610631	0.00924051	0.00093094	0.0408481	0.897424	0.00688929	0.0200804	0.03183	0.0515797	-0.0278358	0.884324	0.00644741	0.00873294	0.0348861	5.89333e-06	-0.052658
DDR1	4.40084e-07	0.0567259	0.781466	0.00645956	6.56336e-11	-0.071501	0.694788	0.010194	0.000940668	0.0415336	0.0613519	0.0272755	8.03898e-06	-0.0528963	0.000134988	0.0466813	0.0630466	-0.0271062	0.000103912	-0.0460237
IER3	0.982852	0.00264661	0.236463	0.0175223	0.922416	0.00383625	0.569637	0.0123744	1	-0.00308429	1	-0.00106174	0.930449	0.00514868	0.376168	0.0164684	0.876588	0.00610615	0.397993	0.0144858
FOSB	2.03697e-08	0.0624469	0.210289	0.0182785	0.0735881	-0.0228139	1	-0.00122766	0.231306	0.0202434	1	-0.00187332	0.523589	0.0132989	0.0345648	-0.0295883	0.070467	-0.0265962	0.373847	0.0149802
KLC4	0.197243	-0.0179962	4.06743e-05	0.0476367	0.0357992	-0.0260002	0.73925	0.00938289	0.14382	0.0230398	0.125828	-0.0237605	0.0955388	0.0249415	0.473404	-0.0144084	0.688571	-0.00999972	0.759783	0.00794819
ERCC1	1	0.00159438	0.572534	0.0102968	0.000193137	-0.0426361	0.862641	-0.0069464	0.680647	0.0110595	0.517833	0.0141163	0.694266	0.0100486	0.373485	0.0165272	0.239364	0.0197497	0.967628	-0.00396466
CYP17A1	1		1		1		1		1		1		1		1		1		1
AS3MT	2.72252e-05	-0.0480023	0.710469	0.00775793	0.000161278	-0.0430957	0.0136995	0.0323865	0.214773	0.0207093	0.894335	-0.00660514	0.00428938	-0.0368735	0.409949	-0.0157138	0.988397	0.00342481	0.0582672	0.0256434
HOMER3	2.5343e-16	-0.0889837	1.14892e-11	0.0749855	0.0165918	0.0290302	0.00314531	0.0372718	0.492024	0.0145297	0.940128	0.00545273	0.940254	-0.00490149	0.0164309	-0.0324315	0.974885	0.00375344	0.836082	0.00665528
CRTC1	0.357299	0.0139496	0.890198	-0.00447913	0.842168	0.00531717	0.456804	-0.0144192	0.0471528	0.028428	1	0.00323446	0.947403	-0.004724	0.712019	-0.00983012	1	-0.00177198	0.49661	0.0126221
RNF215	0.0495616	0.0251332	0.851881	-0.00517777	0.000247269	-0.0419921	0.0554932	0.0268476	0.425647	0.0158171	1	-0.00205059	1	0.00204289	0.421875	-0.0154555	0.46386	-0.0144357	2.46208e-05	0.0494756
SEC14L2	0.455978	0.0119185	0.535842	-0.010993	0.0715377	0.0229468	0.425938	0.015045	1	-0.00283026	0.777335	0.00911631	0.386263	0.0161098	0.434934	-0.0151817	0.913671	0.00526479	7.81028e-05	0.0467249
AVEN	0.00516145	-0.0336937	9.08527e-05	0.045698	1.67603e-05	0.0485403	0.519945	0.0132489	0.961083	0.00527702	0.224537	0.0204346	1	-0.000266963	0.0424108	-0.0287352	0.878359	0.00607255	0.515259	0.0122878
CP	1.18548e-14	0.0841046	1	0.00223397	7.51943e-07	0.0551686	0.505833	-0.0135095	0.291571	0.0186674	0.493908	-0.0145477	1	0.000793978	1	0.000616193	6.31645e-08	0.0626876	1.32247e-134	0.257018
CROT	0.000325578	0.0418614	0.823556	-0.00570869	0.800343	0.006055	0.105058	-0.0238542	1	-0.00419918	0.828163	-0.00807993	6.80935e-07	0.0578639	0.06834	-0.0266513	0.826553	0.00718444	0.0954451	0.0232944
RPS6KA1	0.00207444	-0.0365797	1	-0.0013054	0.0533014	0.0242856	0.657664	0.0108595	1	0.00372146	0.467988	0.0150365	0.510177	-0.0135779	0.583628	-0.0122818	0.0010225	0.0414762	0.0634968	0.0252524
CALB2	4.12053e-67	-0.182244	1.38118e-30	-0.123141	0.127758	-0.0200781	1.67135e-15	-0.0877741	8.34764e-12	-0.076742	3.57606e-15	-0.0875251	2.1813e-18	0.0960629	0.0163121	0.0324588	7.06049e-31	-0.125119	0.0432162	0.0269629
SNRNP200	0.00388489	-0.0346115	0.0540142	-0.0254365	0.363417	0.0136827	0.103168	-0.0239377	1	8.87567e-05	0.215848	-0.0206806	1	-0.00263972	1	-0.00196	1	0.000603194	0.321696	-0.0161149
CIAO1	0.486111	-0.0113222	1	0.000825367	0.0106667	-0.0306424	0.703665	0.0100097	1	0.00153019	0.501822	0.0144006	0.927269	-0.00521485	0.165444	-0.0220272	0.897844	0.00561443	2.20066e-05	0.0497367
TAF6L	0.000281492	0.0422472	0.102569	0.0223639	0.0258735	-0.0273148	0.125164	0.0229429	1	-0.000404051	0.840562	0.00782109	0.302192	-0.0180613	1	0.00203659	0.564505	-0.0124496	0.274859	0.0172162
INSIG2	0.54585	-0.0102211	0.000359608	0.0421776	1	-0.00172116	0.00432942	0.0362641	0.163182	0.0223391	0.0124161	-0.0336233	0.0116295	0.033606	1	-0.00260803	0.062547	-0.0271446	0.222828	0.0185594
KPNA6	0.837324	0.00518364	0.304952	0.0157622	6.32943e-06	0.0507138	0.846246	-0.00729584	0.940151	0.00587799	0.431742	0.0156946	0.638557	0.0111013	0.31619	-0.017845	0.80926	0.00754438	1	-0.000226488
MAN1A	0.317082	-0.0148372	0.728736	0.00742898	0.0327636	0.0263695	0.0546317	0.0269188	0.490048	0.0145626	0.607	0.0124178	0.102129	-0.0246144	0.479546	-0.014286	0.0255945	0.0309117	0.889711	0.00568162
ITPKC	0.646334	-0.00846026	0.185951	0.0190323	0.459981	0.0118308	0.199471	0.0203365	0.317362	0.0180694	1	-0.000927588	1	-0.00327761	0.114782	-0.0240634	1	0.00084105	1	-0.00178423
COQ8B	0.137053	-0.0201163	0.171485	0.0195321	0.317797	-0.0146505	0.561861	0.0124976	1	-0.00410442	0.898513	-0.00650208	0.820331	0.00753327	0.309418	-0.0180199	1	-0.0010326	0.0227445	0.0296112
BRD8	0.295604	0.0153419	0.579944	-0.0101583	0.30112	0.0150162	0.0398809	-0.0282683	0.0456939	0.028564	0.495607	-0.0145211	0.0168696	-0.0322679	0.399758	-0.0159176	0.960017	0.00413135	1	-0.000896652
KIF20A	0.000421088	-0.0411688	0.704282	-0.00788356	3.12635e-15	0.0854712	0.0796119	-0.0252143	1	0.00306967	0.327571	0.0178665	0.821163	0.00751653	0.852244	0.00709749	0.933561	0.00481549	0.120987	-0.0220566
FARSA	0.0888603	-0.022375	0.167601	0.0196625	5.06908e-14	0.0818049	1	0.00156696	0.864077	0.00754431	1.43153e-05	0.0519822	0.0977327	-0.0248303	0.775938	-0.00862136	0.0642858	0.0270164	0.317041	-0.0162187
GCDH	0.0280136	-0.0275413	0.00111722	0.0390355	0.182835	0.0181161	0.0339583	0.0289352	0.578444	0.0128666	0.00116446	-0.0410924	0.885436	0.00615569	0.421126	-0.0154799	0.370124	0.016459	0.5828	0.0110775
MAST2	0.0348965	0.0266421	0.765439	0.00674716	0.000277435	0.0416928	0.64115	0.0111484	0.437841	0.015553	0.0983112	-0.0250098	1	0.000945224	0.308886	-0.0180316	0.958757	0.00417142	0.930506	0.00482142
DNASE2A	2.70299e-21	-0.102124	1.41208e-08	-0.0636134	0.968727	0.00290263	0.0182866	0.031296	0.803975	-0.00875694	0.0267873	-0.0307353	0.232538	0.019854	0.8863	-0.00640186	0.0570852	-0.0275613	8.16802e-15	0.0856853
RAD23A	1.57345e-08	-0.0629049	1.31231e-05	-0.0502086	2.74773e-13	0.079482	0.0382668	-0.0284377	0.311669	-0.018208	0.56151	0.0133056	1	-0.00322415	0.26477	-0.0191141	1	0.00312226	0.989753	-0.00341403
CALR	1.25288e-09	0.0672225	7.78235e-15	0.0850375	9.94646e-20	-0.0978814	2.3839e-08	0.0636533	0.0874966	0.0256126	0.257851	0.0195462	9.72014e-06	-0.0524905	1	0.00082549	0.180984	-0.0215428	3.14427e-05	0.0489052
SYCE2	0.107624	0.0214092	0.00571591	-0.0339755	2.0439e-21	0.102138	0.805948	-0.0081231	0.031056	-0.0301521	0.00116802	0.04108	0.484016	0.0141259	0.104614	0.024541	1.23723e-08	0.0655396	6.75298e-07	-0.0571282
NFAT5	0.00115302	0.0383326	1	0.0014903	0.0555418	-0.0241072	0.932746	-0.00535287	0.239488	-0.0199972	0.16426	0.0222816	1	0.00134265	0.0892193	0.0253567	1	0.00231578	2.59974e-12	0.0778402
NOB1	1.32466e-07	-0.0590252	0.13964	0.0206993	2.07139e-17	0.0916929	0.866781	-0.00682509	0.36571	-0.017014	0.0780672	0.0261553	0.994023	-0.00355288	0.279727	-0.0187477	0.371867	-0.0164259	0.0442294	-0.026858
NQO1	2.94973e-07	-0.0575032	0.750662	0.00702242	0.0770486	-0.0225958	0.214524	0.0198871	0.0266833	0.0307698	0.709826	0.0104453	0.00823171	-0.0347747	0.712019	0.00983109	0.230076	0.0200113	0.207374	0.0189919
PPFIA3	0.638176	0.00860066	0.0598687	0.0249794	0.559266	0.0101088	1	-0.00139346	0.740644	0.00996122	0.898156	-0.00651138	0.290784	-0.0183507	1	0.0030314	0.554447	0.0126494	1.09942e-07	0.0605957
GYS1	8.9423e-06	0.0505034	1.0204e-11	0.0751608	1	-0.00196494	0.481509	0.0139641	0.263721	-0.019353	1	0.000197925	0.600933	0.0118363	0.271563	-0.0189452	0.102652	0.024738	0.924165	0.00495446
RUVBL2	1	0.0011983	0.00109183	0.039106	9.73953e-23	0.105363	1	-0.00133893	1	-0.00146233	0.0022662	0.0391437	0.994139	0.00354978	0.222404	0.0202458	1.94951e-06	0.0561483	3.14099e-14	-0.0839088
LIN7B	0.777749	0.00618401	1	0.000463094	0.457944	0.0118695	0.912712	-0.00587581	0.923148	0.00631553	1	0.000378063	0.758681	-0.00878036	0.844138	0.00729655	0.658919	0.0105982	0.0911417	0.0235162
BAX	1.65837e-24	-0.109759	0.997986	-0.00237253	8.54097e-06	0.0500549	0.0165208	-0.0316752	0.112048	-0.0243755	0.0306748	0.0301917	0.615655	0.0115412	4.69858e-05	0.0492001	0.305348	0.0180031	0.0420203	-0.027088
TFAM	0.335668	0.0144229	0.95454	-0.0032233	4.69134e-10	0.068393	0.377403	-0.0160321	0.793364	0.00895497	0.617847	-0.0122215	0.875203	0.00641335	0.109048	-0.024342	0.0747224	0.0263092	0.00714151	-0.0338371
ZFP81	0.136647	-0.0201342	0.645277	-0.00895616	0.294085	0.0151789	1	0.00331629	1	0.00325721	0.735676	-0.00997698	0.484101	-0.0141213	0.35565	-0.0169234	0.940097	-0.0046304	0.369916	-0.0150673
EFNB3	2.04621e-25	0.111826	7.89551e-146	0.26671	0.216849	-0.0171059	0.349358	-0.016628	1	-0.0017436	0.00156326	-0.0402286	0.101564	0.0246448	3.51306e-07	-0.0593742	0.982579	-0.00357996	0.000701068	0.0409738
MMD	7.10783e-05	0.045726	2.45247e-11	-0.0738663	0.000136194	0.0435273	2.29843e-10	0.0713309	0.0200362	-0.0318776	0.982568	-0.0043041	0.777289	-0.00838884	1	0.00337773	1	0.00265418	1.53428e-13	0.0817864
HLF	0.0231791	0.028278	0.664993	-0.0086049	0.00992765	-0.0308956	0.00931499	-0.0337407	0.000110028	-0.0470979	2.29753e-07	-0.0603271	0.0096235	0.0342551	0.735051	0.00940332	0.577502	0.012175	0.0911161	-0.0235223
FAM162A	0.144321	-0.0198271	3.37967e-15	0.0861122	6.4632e-68	0.183314	0.0696923	-0.0258191	8.36027e-21	-0.102322	1	0.00246787	0.781608	-0.00831523	1.17581e-14	0.0858486	2.95464e-15	0.0877834	2.15543e-48	-0.155758
RPL8	0.00818123	0.032137	0.00399021	-0.0351573	0.000149355	-0.0432923	0.26717	0.0184999	0.201281	-0.0211158	0.832064	-0.00799407	0.866007	0.00664778	0.753512	0.00905114	0.635199	0.0110504	0.2851	-0.0169497
GRM3	9.43812e-29	0.11909	0.00131361	-0.0385646	0.328357	0.0144197	0.298549	0.0177491	0.000262823	-0.0449323	0.0618875	0.0272296	1	0.000896299	0.395785	0.0160127	0.552454	-0.0126954	9.13429e-06	-0.0517093
SSBP2	1.06437e-07	0.0594408	5.81678e-44	-0.147787	3.35228e-29	-0.119834	9.19855e-05	-0.0468894	0.959394	0.00535857	1	-0.00253697	2.84626e-09	0.0676292	0.00209474	0.0392493	1.33741e-05	-0.0521609	0.00494666	0.0350493
FANCL	0.00175087	-0.0370868	0.741327	0.00720818	0.18367	-0.0180898	0.606256	0.0117616	0.128406	0.0236572	0.776941	0.00912904	1	0.00302557	0.219568	0.0203274	0.143513	-0.022936	0.953392	-0.00432333
BRINP2	3.76064e-17	-0.0913068	5.55154e-10	0.0690232	9.96688e-17	0.0897848	1.91451e-07	0.0598629	0.00838782	0.0349594	2.82003e-08	0.0641765	1.45425e-28	-0.119828	0.982264	-0.0040292	3.71979e-14	0.0845211	0.420493	-0.0140507
GSTM5	5.3744e-07	0.0563248	1.08391e-24	0.110495	1	-0.00125082	0.142121	0.0222808	0.312769	0.0181825	0.439412	-0.0155497	0.00280027	0.038205	0.000247274	-0.045163	0.32103	0.017576	0.693052	0.00914699
GSTM7	0.2818	0.0156648	0.00188783	0.0375002	1	0.000915669	1	0.000810184	0.902192	-0.00679303	0.0808328	-0.0259949	0.00372571	0.0373342	0.0389364	-0.0290953	0.526766	0.0131859	1	0.0014682
GSTM3	0.0630248	-0.0240337	0.498588	-0.0117217	0.669805	0.00827084	1	-0.00345427	1	-0.00223141	0.924459	-0.0058617	0.53571	0.0130573	0.731315	-0.00947737	0.000332016	-0.044528	0.0778399	0.0242964
STAT3	0.15741	0.0193434	0.320651	0.0154083	0.246208	-0.016331	0.0785903	0.0252818	0.291428	0.0186725	0.321665	-0.0180116	0.460522	0.0146124	1	0.00234258	0.514572	-0.0134224	0.0934942	0.0233925
STAT5A	0.697983	0.00753174	0.297515	-0.0159422	0.96283	-0.00302585	0.964975	-0.00461361	1	0.00355756	0.545629	-0.0135953	0.678627	-0.0103397	0.323734	0.0176626	0.947906	-0.00446105	0.753829	0.00805711
PTRF	0.919992	-0.00377942	0.601259	0.00977905	0.294434	-0.0151703	0.672221	0.0106103	0.553598	-0.0133421	0.871385	-0.00712341	1	-0.000557394	0.923475	-0.00556509	0.632299	0.0111197	1	-0.00166646
MAP3K11	0.58313	0.00956484	0.992551	0.0024843	0.868988	0.00483203	0.421274	0.0151364	0.246353	0.0198149	0.870635	-0.00713646	0.0812313	-0.0257515	0.165738	-0.0220138	1	-0.00041252	0.0127285	0.031795
AKT2	2.48284e-11	0.0733931	0.000875105	0.0397376	0.280229	0.0155043	0.138793	0.0224161	0.12562	0.0237755	0.566802	0.0131958	0.596476	0.0119492	0.507753	-0.0137376	0.476793	-0.0141767	0.116271	-0.0222705
DNAJA3	1	0.000155035	0.41136	-0.0134376	1.85733e-09	0.066126	0.312263	-0.0174293	1	-0.00173999	1	-0.00368811	1	0.00170823	0.102507	-0.0246448	0.820074	-0.00732202	0.751236	-0.00810812
HMOX2	0.0675243	-0.0237202	0.765363	0.00675164	0.00343436	0.034444	0.730154	-0.00952827	0.798701	-0.00885267	1	0.00310504	1	0.0017726	0.281572	-0.0186918	0.996584	0.00321873	0.00499327	0.035018
CDIP1	0.191581	0.0181794	0.80349	0.00606769	0.0124387	-0.0300926	0.443487	0.0146822	0.421502	0.0159027	0.553572	-0.0134489	0.984176	-0.00385646	0.910287	-0.00586904	0.19597	0.0210357	0.341478	-0.0156857
ZAK	0.199835	0.017913	0.662701	0.00865017	0.0018539	0.0363595	0.000149388	-0.0457048	0.00436992	-0.0370404	0.04661	-0.0284772	0.418033	-0.0154407	1	0.00119589	0.897694	-0.00561956	0.0285163	-0.0287066
CWC15	0.727459	-0.00705781	0.704408	0.00788159	5.21928e-05	0.0458862	0.660539	0.0108098	1	0.00413127	0.545971	0.0135883	0.51841	-0.0134015	0.557548	-0.0127742	0.262194	0.0191062	0.621085	0.01041
COL5A3	0.758928	0.00650009	0.330261	-0.0151795	0.421522	-0.0125534	0.951682	-0.0048879	0.0696807	0.0266931	0.873968	-0.00707384	0.700228	0.00993212	0.65511	0.0109581	0.904751	0.00545699	0.722209	-0.00862909
DNMT1	6.62182e-07	0.0559162	0.305401	0.0157537	4.16731e-29	0.119634	1.52339e-07	-0.0602966	0.183363	-0.0216629	0.0148186	-0.0330029	0.0120834	0.0334712	0.619996	-0.0116135	0.936961	-0.00473269	1.14922e-05	-0.0512073
PPAN	0.0323592	-0.0269564	0.139631	-0.0207014	8.17838e-73	0.189755	0.0647245	-0.0261695	0.804768	-0.00874263	5.77041e-05	0.0487893	0.942864	-0.00484763	1	-0.0016765	1.77091e-05	0.051533	4.85955e-23	-0.107443
ANGPTL2	0.506821	0.0109412	0.020751	0.0293939	3.11425e-12	-0.076048	1	0.0013602	0.132308	0.023484	0.0710829	-0.0266029	0.870619	-0.0065471	1	0.000284607	0.0295289	0.030349	1	0.00203107
CACNA1E	5.27056e-09	0.0648176	0.290631	-0.0161057	0.0553638	-0.0241232	0.141843	-0.0222927	0.241129	0.0199442	0.202475	-0.0210695	0.47104	-0.0143835	1	-0.00171901	0.804933	-0.00764262	0.00011165	0.0458442
CACNA1B	6.67873e-05	-0.0458776	0.0129929	-0.0311568	0.00471643	0.0334218	0.22398	0.0196286	0.967152	0.00512054	0.964145	0.0048443	0.0334084	0.0296789	0.00857967	-0.0347335	3.04906e-08	-0.0639792	2.16389e-12	0.0781074
TRMT10A	1.67498e-06	-0.0540399	0.00821589	0.0327603	5.41038e-10	0.0681618	0.832805	0.00760073	0.126626	0.0237356	0.141507	0.0231279	0.895556	0.0059337	0.0421097	-0.0287691	0.0590629	0.0274048	0.0580568	-0.0256627
ETV1	0.0641261	-0.0239537	1.07368e-08	0.0640932	5.65914e-09	-0.0642286	5.6632e-06	0.0531428	0.026772	-0.0307473	2.15053e-18	-0.0964738	9.09896e-51	0.159569	1.55952e-09	-0.0688571	9.76408e-11	-0.0733615	0.40032	0.0144425
KIFC2	0.773217	-0.00626224	0.632098	-0.00920701	0.030346	-0.0266816	0.429477	0.0149802	1	-0.00279145	0.8673	-0.00720244	0.0344888	-0.0295474	1	-0.00297199	0.540437	-0.0129196	0.421752	0.0140221
PSAP	0.210814	-0.0175827	0.219645	0.0180011	5.81946e-51	-0.158838	1.89186e-12	0.0784444	1.12573e-07	0.06138	0.404865	0.016215	0.0173287	-0.0321618	0.736055	-0.00938868	0.463619	-0.0144416	0.317223	0.0162131
IKBKG	1	0.000220514	0.425176	-0.0131623	0.0085261	-0.0314314	0.457056	0.0144139	0.122024	0.0239252	1	0.00227703	0.137994	-0.0230418	0.353659	-0.0169813	0.79484	0.00782665	0.964441	0.00405023
PAX2	8.5649e-50	-0.157072	1.9621e-122	0.245028	6.46457e-78	0.196223	0.144588	0.0221812	0.997116	0.00430922	8.40699e-41	-0.14365	8.22329e-250	0.345324	3.92668e-74	-0.192598	1.29355e-29	-0.122514	0.918772	0.00507991
WARS2	1	0.00156557	0.487649	0.0119439	0.468867	0.0116783	0.877818	-0.00660188	0.0207462	0.0317368	0.880781	-0.00695254	0.45639	0.0146879	0.00654645	-0.035655	0.561164	0.012515	0.772162	0.00773102
ATN1	0.0102032	-0.0313568	7.47563e-08	0.060616	2.69623e-06	-0.0525438	0.0305079	0.0293646	0.0559748	0.0276941	0.0322457	0.0300029	0.698835	-0.00997224	0.000301805	-0.0446624	0.766863	-0.00838305	0.00922531	0.0329506
PHB2	2.4689e-14	-0.083142	3.15017e-09	0.0661807	2.63479e-62	0.175603	0.0898066	0.0246528	1	0.00180751	0.0166215	0.0325733	0.787678	-0.00819213	0.284462	-0.018611	2.50103e-05	0.0507772	5.73751e-05	-0.0474829
PTPN6	4.19174e-10	-0.0690047	0.764225	0.00677166	0.054944	-0.0241553	0.344341	0.0167222	0.820844	0.00841393	0.00188884	-0.03969	0.00331227	0.0376882	0.0199522	-0.0317183	0.0015101	-0.0403567	0.407709	0.0142984
ENO2	4.0129e-08	-0.0612342	8.11625e-51	0.158874	0.0368638	0.0258727	5.98928e-10	0.0698168	2.63397e-07	0.0598285	0.952688	0.00515897	0.00396435	0.0371345	0.126321	-0.023573	0.696712	-0.0098524	0.686525	-0.00928303
EMG1	4.26404e-07	-0.0567887	0.217324	0.0180708	1.03074e-65	0.180326	1	0.00252261	0.81562	-0.00854238	0.00557408	0.0363741	0.0544978	0.0275973	0.815145	-0.00783473	0.00130364	0.0407852	1.28374e-07	-0.0603043
LPCAT3	1	-0.00152325	0.906397	0.00416182	0.363375	0.0136839	0.022249	0.0305534	0.996531	-0.00432214	0.193297	-0.0213559	1	-0.00193313	0.00884411	-0.0346189	0.995983	0.003239	0.078529	0.0242523
ATP6V1F	9.04966e-42	-0.143832	0.899872	-0.00428508	0.0173101	0.0288714	1.6994e-06	0.0556314	0.249233	-0.0197424	0.0808355	0.0259937	0.89256	0.00600003	1	0.000938426	0.342799	-0.0170911	7.11162e-06	0.0522502
IL12B	0.541702	-0.0102985	1	-0.00152634	0.912276	0.00402206	1	-0.00068765	1	-0.000584241	1	0.00142892	0.946556	-0.00474883	1	-0.000887273	0.428836	0.0151628	0.854051	-0.00633103
CLCN5	2.16213e-18	-0.094672	2.44057e-37	-0.136174	0.000520934	0.0400013	3.75611e-07	0.0585845	1.14715e-12	0.0795843	5.04552e-07	-0.0588409	0.314469	-0.0177642	0.499829	0.013888	6.67277e-12	0.0773788	0.582267	0.0110871
CLCN3	1.47195e-40	-0.14172	0.0852135	-0.023291	0.0159947	0.0291671	0.647843	-0.011026	0.121848	0.0239338	0.00371304	0.0376526	1.06207e-47	-0.154714	0.593979	0.0121024	3.07969e-21	0.103767	0.000460404	-0.0421463
HIF3A	0.00120958	-0.0381909	0.899872	-0.00428461	6.57068e-08	-0.0598549	0.0086796	0.0339803	1	-0.0036167	0.943223	-0.00538774	0.125122	-0.0235686	1	0.000211429	0.00217793	0.0392911	0.514064	0.0123098
GPX6	2.71064e-06	-0.0530454	0.899825	-0.00428912	0.038549	0.0256887	1	0.00161627	0.908358	0.00665296	0.535935	0.0137626	0.00597621	-0.0358001	0.611956	-0.0117528	0.194996	0.0210665	1	0.00297127
PDE1C	0.486767	-0.0113075	4.52314e-05	0.0473832	1.69425e-49	-0.156535	1	-0.00132641	0.097539	-0.0250885	0.479029	-0.0148209	0.434791	-0.0151042	4.37592e-07	-0.0589493	0.00830241	-0.0350534	0.000316094	0.0431482
UTP20	0.0295091	-0.0273319	0.859182	0.00504037	4.62234e-17	0.0907208	0.396148	-0.0156456	0.258666	-0.0194821	0.216872	0.0206513	0.794425	-0.00805295	0.508789	-0.0137046	0.734839	0.00905276	0.086298	-0.023789
SPIC	0.41898	-0.0126677	1	-0.000546274	0.767401	0.00661128	1	9.23096e-05	1	0.000145384	0.998375	-0.00388718	0.771965	0.00849025	0.891719	-0.00631656	0.552069	-0.0127031	0.982633	0.00361658
9330159F19RIK	0.747064	0.00670877	2.05474e-17	-0.0924027	0.971684	0.0028375	9.75285e-40	0.141047	2.24968e-05	-0.0507688	0.00874873	-0.034862	0.78006	0.00834439	0.437874	-0.0151247	0.525721	-0.0132071	0.268524	0.0173733
CUL3	0.062317	0.024086	0.346968	-0.014808	0.987469	-0.00250033	0.498687	0.0136384	1	0.00177003	0.840562	-0.00782058	0.26625	0.0189631	0.05293	0.0277807	0.138528	0.0231453	0.914393	-0.0051961
SST	1.45335e-19	0.0977537	2.43413e-22	-0.104996	0.139368	0.0196138	0.000691242	0.0416774	8.67182e-25	0.111686	0.000371514	-0.0441922	0.941214	0.00488193	1	0.00335466	0.000418273	0.0439232	6.62758e-18	0.0944607
IL11	0.444948	-0.0121387	1	0.000706923	0.604037	0.00934752	0.436808	0.0148214	1	-0.00206802	0.0150536	0.0329394	0.38348	0.0161741	0.992667	-0.00377525	0.686916	0.0100258	0.679553	0.00940775
LARGE1	0.890059	0.00429911	5.75645e-07	-0.0567196	0.254295	-0.0161264	0.846333	-0.00728088	0.298154	0.0185153	0.315617	-0.0181492	5.56872e-06	-0.0536855	0.868712	0.00675359	0.00871539	-0.0348939	0.592323	-0.0109068
DDX56	1.19071e-07	-0.0592296	0.676758	0.00838398	3.75282e-23	0.106357	1	0.000946851	0.804946	0.00873695	0.000493365	0.043441	0.921399	-0.00535488	0.0702548	-0.0265165	0.0172848	0.032422	0.00906209	-0.0330162
TMED4	0.129576	0.0204366	0.0104496	0.0319282	1.67451e-17	-0.0919469	0.0367449	0.0286049	0.00298743	0.0381952	0.321432	0.0180168	0.00150114	-0.0400837	0.444768	-0.0149784	0.542967	-0.0128685	0.510776	-0.0123662
COL26A1	3.20072e-26	0.113619	3.34272e-12	-0.0767763	0.00916295	0.0311753	1.1958e-07	0.0607531	2.8702e-46	0.152422	6.06261e-21	-0.102969	0.552765	0.0127421	5.0416e-08	-0.0629541	0.000233135	0.0454321	8.76391e-14	0.0825408
BID	3.87003e-18	-0.0939976	5.49484e-07	-0.0568139	0.00219884	0.0358439	0.827723	-0.00770331	0.00162556	-0.0399843	0.00389873	0.0374965	0.859494	0.00677565	0.736124	-0.00938419	1	-0.00130557	9.00583e-05	-0.0463739
RALB	0.11979	-0.0208533	0.287539	0.0161774	0.00881735	-0.0313125	0.0143425	0.0322151	7.37442e-05	0.0480459	0.00166571	-0.0400397	0.499449	0.0138007	0.00670295	-0.0355719	0.97894	0.00366429	0.0163288	0.0308581
PPP1CC	0.624859	-0.00883441	7.07441e-06	0.0515539	0.0348	0.0261183	0.064083	-0.026215	0.322412	0.0179492	0.921119	0.00595422	0.787821	-0.00819007	0.00183612	0.0396513	0.00132642	0.0407328	4.08811e-05	-0.0482845
DNAJB11	0.38654	-0.0133328	0.0308558	0.0278266	0.00548369	0.0329322	0.538842	0.0129114	1	6.13949e-05	0.137679	0.0232723	0.10346	-0.0245463	0.106851	0.0244327	0.708616	-0.00961184	0.400606	0.0144366
TBCCD1	1	0.00140318	1	-0.000170253	0.844187	0.00527787	0.358345	-0.0164326	1	0.00222458	0.645715	-0.0116935	0.933384	0.00509951	0.775897	-0.00862243	0.961193	0.00410023	1	0.00309443
CLEC11A	0.319718	-0.0147792	9.43655e-05	0.0456022	0.795195	0.00614385	0.0121997	0.0327895	0.191563	0.021411	0.811765	-0.00841339	0.90383	0.00573691	0.118932	-0.0238814	0.658919	0.0105974	0.786806	-0.00747518
ZFP324	0.783946	0.00608075	1	0.00159483	0.742591	-0.00705628	1	-0.00126641	0.942686	0.00583235	0.718273	-0.0102954	0.982532	-0.00390016	0.803287	-0.00807998	0.656774	-0.0106457	0.058123	0.0256555
GAB2	0.27986	0.0157147	0.491103	-0.0118734	9.66946e-15	-0.0840066	1	-0.000727854	1	-0.000734119	0.0548918	0.0277688	0.956849	-0.0044986	1	0.0018262	0.423101	-0.0152873	1	0.00121497
CORO1C	0.500569	-0.0110449	0.0380127	-0.0269564	5.00017e-19	0.0960534	0.274444	0.0183285	0.218239	0.0206122	0.597735	0.0125798	0.668783	0.0105251	0.418143	-0.0155569	1	0.00143233	0.891691	0.00563679
TAX1BP1	0.97638	0.0027737	0.482898	0.0120377	0.00828974	0.0315266	1.50715e-06	0.0558721	0.406593	0.0162136	0.906182	-0.006322	1	0.00143316	0.803618	-0.00807106	0.561086	-0.012518	1.08763e-05	0.051326
CTSE	0.918995	-0.00379507	0.901113	0.00426114	1	-0.00150719	1	0.000183951	1	-0.000128206	1	-0.00328418	0.96254	0.00437707	0.9453	-0.00497267	0.884437	0.0059181	1	-0.00197746
NDRG2	0.558011	-0.0100127	0.891811	0.00443754	0.00108404	-0.0379475	0.687274	0.0103209	0.665902	-0.0113034	0.887513	-0.00680156	0.874145	-0.00644173	0.739469	0.00931124	1	-0.00153378	0.443614	-0.0135961
METTL17	0.692974	-0.00762397	0.439368	0.0128771	0.917161	0.00391784	0.548292	-0.0127412	0.613324	0.0122349	1	-0.0008572	0.354089	-0.0168184	1	-0.00150168	0.157355	0.0223994	0.162848	-0.0204203
ARHGEF40	1.03527e-20	-0.100674	0.161039	0.0198908	0.0164495	0.0290638	1	0.00114375	1	-0.00366869	8.13894e-05	-0.0479981	0.000158844	0.0460693	0.0015226	-0.0401962	0.103367	-0.024702	0.00608713	0.0343621
PNPLA6	0.540679	0.010319	0.997408	0.00239008	0.065739	-0.0233332	0.679229	0.0104595	1	-0.000301783	0.963413	-0.0048622	0.967384	-0.00427426	0.490545	-0.0140752	0.600374	-0.0117479	0.0232368	0.0295229
MCOLN1	1	-0.000144687	0.9293	0.00373332	1	0.00171318	0.498865	-0.0136346	0.766048	-0.00942268	0.924459	-0.00586019	1	0.00227026	1	0.00167252	1	-0.00301602	0.125395	0.0218605
ARHGEF18	4.1408e-11	-0.0726255	8.63859e-05	-0.045823	7.53931e-06	-0.0503335	0.141519	-0.0223088	1	-0.00245643	0.278999	-0.0189967	0.918074	-0.00542904	0.15835	0.022263	0.0317607	-0.030068	0.116949	-0.0222379
PKN2	4.33875e-27	0.115524	0.0161837	0.030342	5.20585e-12	-0.0752992	0.593057	-0.0119931	0.815364	0.00854545	0.169636	-0.0220954	1	-0.000545637	0.525855	-0.0133918	0.0436294	-0.0287303	0.0212424	0.0298717
CD33	1		1		1		1		1		1		1		1		1		1
ETFB	0.00030405	0.0420428	0.00337373	-0.0356995	0.0060885	-0.0325822	0.817075	-0.00791715	0.0549004	0.027785	1.48825e-05	-0.0519013	1.37909e-07	0.0608681	1	0.00012792	0.000223841	-0.0455496	0.000942527	0.0401306
NKG7	0.468285	-0.0116864	0.645277	-0.0089566	1	0.00160152	1	-0.00339283	1	-0.0026768	0.983027	-0.00426183	0.856076	0.00683943	0.934165	-0.00524326	0.574425	-0.0122374	0.96331	0.00408942
STXBP2	2.24985e-06	-0.0534329	8.3728e-06	-0.0511923	0.0976888	-0.0214503	0.0675284	0.0259873	0.624504	0.0120094	0.49392	-0.014546	1	0.00140905	1	0.00231322	0.369658	-0.0164672	0.00308055	0.0365632
PCP2	0.0315477	-0.0270571	0.95315	-0.00324884	0.633438	-0.0088579	0.615517	0.0115946	1	0.00238589	1	0.00241069	0.974178	-0.00410581	0.795462	0.00824564	0.585624	-0.0120103	0.573635	0.011226
SGCE	0.0365022	-0.0264604	0.573073	0.0102877	4.48847e-56	-0.166628	0.00335911	0.0370724	0.00178505	0.0397076	0.502104	0.0143913	5.41359e-06	-0.0537429	6.2917e-09	0.0665448	0.993807	0.00328831	0.308657	0.0164102
CHN2	6.92675e-40	-0.14054	0.92234	0.0038665	1.09328e-24	-0.109944	2.06485e-06	0.0552263	4.63151e-06	0.0541607	2.33767e-24	0.111071	2.1371e-36	-0.135257	1.88513e-09	0.068541	7.41673e-68	0.184647	0.0284884	-0.0287127
WWOX	0.779544	0.00615558	0.653341	-0.00880952	0.519917	0.0107931	0.799895	0.00825197	0.308686	0.0182765	0.597621	-0.0125825	0.995206	0.00352799	0.392473	-0.0160818	0.382729	0.0161666	0.542407	0.0117858
SLBP	5.70321e-06	0.0514732	0.125423	0.0212936	7.71937e-10	0.0675837	0.0345936	-0.0288578	0.651301	-0.0115715	0.578495	0.0129605	1	0.00200632	0.000680393	0.0425252	6.72653e-06	0.0536151	0.222403	-0.0185712
TYR	0.500468	-0.0110468	0.878368	-0.00469533	0.994415	0.00237388	1	-0.00351517	1	-0.0030182	0.826829	-0.00810462	0.449584	0.0148308	0.948378	-0.00491552	0.572729	-0.0122721	0.99143	0.00338068
AQP1	0.285699	-0.015573	0.629625	0.00925416	0.554396	0.0101855	1	0.00248118	1	0.00221286	1	-0.00161063	0.898662	0.00584909	0.862301	0.00691107	1	-0.00142258	0.930037	0.00483128
ARID3B	9.69564e-225	0.327836	3.70698e-203	-0.312614	1.26228e-10	-0.0704833	1	-0.00116498	9.33214e-38	0.137817	0.56223	-0.0132908	4.93657e-09	-0.0667235	4.07497e-12	0.0779029	0.000872064	-0.0419222	0.0610932	0.0254303
CNN2	1	0.000810789	0.373677	-0.014226	1.35245e-67	-0.182884	7.90625e-14	0.0828047	0.778484	0.00921756	1	0.000842073	0.794053	-0.00807118	0.00273382	-0.0384444	0.00803516	-0.0351645	9.79344e-31	0.124211
POLR2E	4.45693e-07	-0.0567016	0.0324369	0.0276166	5.67844e-29	0.119352	0.00390281	0.0365965	6.95961e-05	0.0481856	0.0217156	0.0315466	0.00885244	-0.0345407	0.637464	-0.011297	9.96462e-08	0.0618479	0.0424647	-0.0270421
ABCA13	0.385432	-0.0133595	0.725028	0.00749067	1	0.000820371	0.866337	0.00683465	0.935143	0.00600503	0.920342	0.00597015	0.977401	-0.00401782	0.21127	0.0205635	0.410335	0.0155669	0.806134	-0.0071569
MYO9B	0.782469	0.00610477	0.226404	-0.0178084	1	0.00117495	0.743818	-0.00929698	0.800628	-0.00881288	0.529314	-0.0138985	0.984426	0.00381895	0.554829	0.012817	0.822256	0.00727755	1	0.00229338
HDAC9	0.0507459	-0.0250296	0.0543122	0.0254144	0.00132495	-0.0373597	0.00735142	-0.0345229	0.947903	-0.00568525	9.21664e-09	-0.066091	1.08378e-07	0.0613099	0.104604	-0.0245424	3.77735e-07	0.0593834	0.000829543	-0.0405018
LY9	1		1		1		1		1		1		1		1		1		1
CD244	1		1		1		1		1		1		1		1		1		1
ADGRE1	0.518775	-0.0107293	0.549576	-0.0107141	0.911478	0.00404023	0.840019	-0.00744206	0.997819	0.0042589	0.763165	-0.00942559	0.935085	0.00504522	0.957235	0.00465636	0.99929	0.00314429	0.855163	-0.00630752
MTFP1	2.07818e-10	-0.0701232	0.85719	-0.00508467	9.0481e-06	0.0499273	0.63392	-0.0112871	0.230753	-0.0202579	0.47082	0.0149743	0.388192	-0.0160719	0.896109	0.0061959	1	0.00190887	0.0356066	-0.0277765
RAB23	0.291888	-0.0154295	0.888785	0.00450111	0.052385	0.0243638	0.967404	-0.00453668	1	0.00087266	1	0.00104044	0.611184	0.0116289	0.91028	0.00587103	0.409191	0.0155909	0.341961	-0.0156729
RAB11A	3.81396e-13	0.0794286	0.559173	-0.010536	6.3379e-06	-0.0507105	2.33223e-21	0.103266	0.00189187	-0.0395418	0.00928852	-0.0346535	0.0679139	0.0265964	0.00145851	-0.0403196	0.0192936	-0.0320212	0.00260133	0.0370985
EIF2B2	5.08205e-06	-0.0517211	0.342604	0.0149065	0.11085	0.0208145	0.610527	0.0116873	1	0.00221316	0.367073	0.0169923	1	-0.000637217	0.960524	0.00458005	1	-0.000775225	0.968064	0.0039339
DLST	0.780636	0.0061322	0.0338634	0.0274405	2.12541e-07	0.0576484	0.871989	0.00671956	0.897424	0.00688994	0.550124	0.0134994	0.414386	-0.0155184	1	0.00252194	0.510237	0.0135047	0.172419	-0.0200948
PGF	0.234826	-0.0168744	1	0.00121007	0.846135	-0.00524027	0.587511	0.012088	0.985983	-0.0046308	1	-0.00263771	0.509959	-0.0135823	0.382825	0.0163086	0.543743	-0.0128515	0.506526	0.0124439
ULK2	6.83676e-11	0.0718551	0.978404	-0.00275617	1.51218e-07	-0.058298	0.107044	0.0237666	0.997056	0.00431214	0.942443	-0.00540706	0.228761	-0.0199672	0.651346	0.0110337	0.0358853	-0.0295792	2.28787e-05	0.0496481
CCL24	1		1		1		1		1		1		1		1		1		1
DGKQ	0.0112412	-0.0310045	1	0.00108982	0.585888	-0.00965685	1	-0.0015941	1	0.00260356	1	0.00273783	0.575319	-0.0123245	0.890416	0.00634402	0.315703	-0.0177229	1	-0.00153507
GRAP	0.465513	-0.0117364	0.267033	-0.0166819	0.986934	-0.00251413	0.511318	0.0134104	0.813724	-0.00858566	0.252705	-0.0196735	0.124887	0.0235809	1	-0.00276998	0.252605	-0.0193802	1	0.000165811
POU1F1	1	-0.00194248	0.991008	0.00252205	1	-0.000601919	0.532149	-0.0130397	0.697042	-0.0107603	0.8209	-0.00822803	1	0.00150235	0.268353	0.0190195	0.670217	-0.0103816	1	-0.00181297
CHMP2B	0.643634	0.00851327	0.591432	-0.00996043	0.00595899	0.0326552	3.11297e-15	-0.0869875	1.78908e-07	-0.0605299	0.00430363	-0.037191	0.000120578	-0.0467632	3.51448e-07	0.0593714	0.00137092	-0.0406373	0.00475881	0.0351751
PLOD3	0.907518	-0.00398638	0.501735	0.0116603	0.0767272	-0.0226152	0.624365	-0.0114459	0.985539	-0.00463877	0.902773	0.0063964	1	-7.27187e-05	1	-0.00138618	0.159632	0.0223055	0.46696	-0.0131701
AP1S1	5.42575e-28	0.117484	1.42644e-09	0.0674881	0.136907	0.0197079	0.000114166	0.0463668	0.560578	0.013194	0.00108905	-0.0412767	0.479197	0.0142201	0.00186506	-0.0396048	0.567532	-0.0123913	0.918129	-0.005099
MAPK13	5.23012e-07	-0.0563797	1.90382e-09	-0.0670202	0.0235983	0.027681	0.00113551	0.0402876	0.00656986	-0.0357527	0.65292	-0.0115561	0.980467	-0.00393984	3.12246e-07	-0.0596032	0.553043	-0.0126804	0.0129437	0.0317336
SRPK1	9.16358e-25	-0.110349	0.915322	-0.00400559	6.29216e-56	0.166409	0.00589672	-0.0352461	0.682041	-0.0110408	0.025359	0.0309452	0.515863	-0.0134571	0.857443	0.00700007	9.19581e-05	0.0477339	4.22933e-09	-0.0663594
PAX3	7.49159e-189	0.301821	1	0.00164687	1.20415e-126	0.249001	0.00836467	-0.0341005	3.98243e-39	0.140293	5.96807e-38	0.138529	2.29133e-08	-0.0640792	0.254735	0.0193719	1.58468e-11	-0.0761255	0	0.400072
LBR	0.115399	0.0210486	0.208425	0.0183356	2.67751e-13	0.0795181	0.416605	-0.0152313	0.561371	0.0131824	0.638452	0.0118394	0.867054	-0.00662028	0.65165	0.0110224	0.697683	0.00983451	0.0603946	-0.0254817
CRABP2	3.32035e-48	0.15455	3.65151e-42	-0.144737	0	0.511558	5.09486e-08	-0.0623056	0.000159177	-0.0461781	2.25853e-76	0.195762	9.34699e-27	-0.115972	0.283841	0.0186282	0.00025391	0.0452182	0.0236057	-0.0294595
NES	3.70251e-86	0.206205	5.28866e-07	-0.0568901	1	-0.00111872	0.318634	-0.0172878	0.00405558	0.0372641	1.52846e-23	0.109175	8.18028e-16	-0.0889685	1.58425e-21	-0.104277	0.649492	0.0107971	0.994917	-0.00332032
BCAN	0.00103351	-0.0386533	0.473829	-0.0122065	0.0974489	0.0214644	0.391819	-0.0157364	0.727511	-0.0102215	0.617847	-0.0122209	0.723299	0.00948502	0.00166197	-0.0399457	0.866558	-0.00631203	0.714606	0.00877198
HAPLN2	0.973831	-0.00282384	0.184217	0.0190889	0.87778	0.0046794	0.596419	0.0119397	0.755767	0.00962653	0.887421	0.00680309	1	-0.00114303	0.707898	0.00992747	0.916895	-0.0051942	0.892493	-0.00562375
PRCC	0.091058	0.0222553	0.591975	0.0099534	0.401959	0.0129315	1	-0.00300695	0.177109	-0.0218784	1	0.00286738	0.522489	-0.0133204	1	0.000408277	0.987529	0.00344784	0.146584	-0.0210293
RRNAD1	0.00342384	-0.0350191	1	-0.000333062	0.83697	-0.00541296	1	0.00170637	0.132593	0.0234723	0.661161	-0.0113872	0.612935	-0.0115995	0.338452	-0.0173479	0.575204	0.0122222	0.248847	-0.0178755
HDGF	4.20719e-24	-0.108823	9.1071e-05	-0.0456903	0.00110365	0.0378948	0.006304	-0.0350251	3.81685e-08	-0.0633181	0.007165	0.0355302	0.572942	-0.0123668	6.22337e-06	0.0536619	0.528301	0.0131627	4.76242e-14	-0.0833532
SLC25A18	1	0.00183969	0.488302	-0.011931	0.857159	-0.00504351	1	0.00359629	0.963678	-0.00520045	0.125448	-0.0237806	0.47306	0.0143379	0.0143763	0.0329001	0.408996	-0.0155956	0.57002	-0.0112923
THOP1	0.0197435	-0.0289145	0.00968581	0.0321977	2.21372e-22	0.104509	0.340774	0.0167977	1	0.00309692	0.000195246	0.0458385	1	-0.002197	0.377305	-0.0164356	1.52195e-06	0.0566469	0.000180722	-0.0446144
APBA3	0.417353	-0.0126996	0.126639	0.0212371	0.263443	0.0159045	0.00512707	0.0357178	0.552356	0.0133602	0.413073	0.0160349	0.52263	-0.0133152	0.438477	-0.0151043	0.677403	0.0101951	0.35452	0.0153881
MATK	3.27598e-05	-0.0475732	0.685574	0.00822347	0.624244	-0.00900655	0.00556656	0.0354368	1	-0.00412406	0.676283	0.0110671	0.228332	-0.0199835	0.50657	0.013767	0.317989	0.0176586	0.0635897	-0.0252447
PIAS4	1	-0.000650753	0.0478051	0.0259676	0.00798286	0.031657	1	0.00318768	0.449462	0.0153169	0.898562	0.00649895	1	-0.00289518	0.34518	-0.0171902	0.21779	0.0203981	0.378384	-0.0148933
MAP2K1	0.00239749	0.0361372	0.708362	-0.00779389	0.393558	0.0130959	0.117232	0.0232921	0.0305955	-0.0302156	1	-0.00110282	0.855088	0.0068638	0.701662	-0.0100475	1	-0.00134858	0.0219112	0.0297563
SGTA	0.599067	-0.00928363	0.123904	0.0213586	0.0438937	0.0251412	0.694426	0.0101991	0.994411	0.00441198	0.277566	0.0190359	0.377803	-0.0163073	1	0.00290294	0.281413	0.0186231	1	0.0025488
NMRK2	1	0.000734745	0.689151	-0.00815728	0.94601	0.0033572	1	-0.00173217	1	0.000534084	0.570401	0.0131227	0.338893	0.0171752	1	0.00140785	0.492661	-0.0138638	0.840749	0.00656259
TMEM242	0.515854	-0.0107792	0.250564	0.0171279	0.738405	0.00713342	1	0.00144557	0.647322	0.0116345	0.0858437	-0.0256954	0.787117	0.00820993	0.538375	-0.0131428	0.623456	-0.0112905	0.00896673	0.0330556
DTX2	0.485305	-0.0113368	0.299941	-0.0158823	0.856861	0.00505096	0.710871	0.00989348	0.511942	0.0141504	0.916466	-0.00609177	0.473106	-0.0143366	0.877059	-0.00657902	1	0.000653288	0.77121	0.00774937
ZP3	0.785646	-0.00604432	1	0.000237753	0.959492	0.00308678	1	0.00146341	1	0.00115384	1	0.00105542	1	-0.00187604	1	-0.00314638	1	-0.00038891	1	-0.00177214
HSPB1	0.11382	0.0211217	0.397616	-0.0137167	0.545459	-0.0103361	0.71919	-0.00974176	0.0653225	0.0269823	0.843709	-0.00774778	1	-0.000895332	0.624461	0.0115469	0.38031	0.0162239	0.000654239	0.041166
RASA4	0.536235	-0.0103984	1	0.000970288	0.616086	0.00914953	0.0950838	0.0243588	0.602885	-0.0124301	0.621035	0.0121603	0.40047	0.0158198	0.875424	-0.00662375	0.646033	0.0108606	0.774009	0.00769852
SYT5	2.92046e-10	-0.0695854	0.672669	-0.00845863	8.52627e-05	-0.0446895	0.927068	-0.00552492	1	0.000570373	0.817532	-0.00828382	0.652956	0.0108373	0.777369	-0.00858834	0.196697	-0.021014	0.914393	0.0051947
HNRNPA2B1	0.383772	-0.0133942	3.40232e-10	-0.0698028	0.084399	0.0221639	0.00243509	-0.0380642	0.948279	0.00566206	0.00168638	-0.0400063	0.388905	-0.0160583	0.37443	0.0165036	0.0350102	-0.0296772	0.164411	0.0203615
FXYD4	0.393312	0.0131947	0.813545	0.00588826	0.82407	0.00562993	1	-0.00362167	1	0.00418839	0.180283	0.0217545	0.663148	0.0106419	1	0.0001304	1	0.00284316	0.239976	-0.018103
CCDC130	0.0165603	0.0295906	0.56835	-0.0103837	1	-0.00211826	1	-0.00332728	0.358716	0.0171657	0.279975	0.0189723	0.90383	-0.00573385	1	-0.00211232	0.562535	0.0124922	0.103538	0.0228774
MRI1	0.0598121	0.0242843	0.592144	0.00994964	0.0333941	0.0262897	0.575453	0.0122753	0.40769	0.0161879	0.441046	0.0155165	0.720771	0.00954032	0.686448	-0.0103428	0.290694	0.0183735	0.0363386	-0.0276914
PRKACB	0.160843	0.0192173	0.496707	0.0117582	0.0512772	-0.0244619	0.357579	-0.0164475	0.944095	-0.00578431	0.435413	-0.0156255	0.292972	0.0182842	0.877328	-0.00657483	0.762124	0.00846749	0.941565	0.00456258
SGSH	0.265244	-0.016077	0.446026	-0.0127458	0.843823	0.0052882	0.99748	0.00374906	0.28115	-0.0189206	0.289029	0.0187527	0.833322	-0.00726968	0.663744	0.0107934	0.942684	0.00457932	1	-0.000213563
CHD5	0.505941	-0.0109576	0.331436	0.0151548	0.625849	0.00897939	1	-0.000941029	0.660004	-0.0114177	0.891863	-0.00667339	0.666277	-0.0105714	1	0.000733938	0.880106	0.00603614	1	0.00189942
CSTB	1.19619e-05	-0.0498597	6.01052e-07	-0.0566355	0.181159	-0.0181682	0.419044	0.0151831	0.771777	-0.00933799	0.346733	-0.0174282	0.660788	0.0106975	1	0.00159169	0.938559	-0.00466547	6.75011e-09	0.0655582
SH2B2	0.516665	0.0107653	1	-0.00156071	0.000934671	0.0383691	0.0546278	0.02692	0.0866797	0.0256683	0.956565	-0.00503963	0.1687	0.0219025	0.250282	-0.0194969	0.14681	0.0228033	0.00146468	-0.0388263
PEX5	0.774668	0.00623686	0.411571	-0.0134323	0.402704	0.0129186	0.46075	0.0143425	0.754399	-0.00966322	0.930037	-0.00572395	0.975074	0.00407438	0.0803722	-0.0258736	0.462046	-0.0144653	0.0307315	0.0283841
JKAMP	0.0449675	-0.0255571	0.249547	0.0171585	0.000397939	-0.0407319	0.0724119	-0.0256539	0.911172	0.0065885	0.563248	-0.0132709	1	-0.00202787	0.303893	-0.0181527	0.590405	0.0119316	0.805296	0.00716704
CD44	6.77851e-18	-0.0933393	1.12193e-16	-0.0903534	6.96678e-25	-0.110397	9.94741e-10	0.0690021	7.7487e-14	0.0832518	0.00557678	0.0363713	0.0520104	-0.0277947	0.14485	0.022783	0.384467	0.0161285	0.070756	0.0247377
SLC1A2	0.351493	-0.0140704	0.838054	-0.0054164	0.0837222	0.0222042	0.651348	-0.0109647	0.51556	-0.014072	0.0681	0.0267919	2.8847e-22	-0.105751	4.99706e-15	0.0869401	0.0737302	-0.0263792	0.885274	-0.0057586
EIF2AK4	1.66624e-07	0.0585917	1	0.00167866	0.0523561	0.0243665	0.0130367	-0.032563	1	0.00173758	0.00297929	-0.0383244	1	0.00282984	0.0771304	-0.0260685	0.55491	0.0126421	0.00416226	0.0356158
WDR1	0.0482884	0.0252514	0.833468	-0.00551167	0.000543081	0.0398881	0.000391648	0.0432317	1	-0.000627591	0.641333	0.0117868	0.988621	-0.0036914	0.144873	-0.0227792	0.997884	-0.00318875	1.21269e-12	0.0789202
SLC2A9	0.296173	-0.0153245	0.165944	0.0197205	0.879851	0.00462999	0.479473	0.0140051	0.623054	0.0120487	0.395452	0.0163991	0.0843665	-0.0255725	0.689501	0.0102877	0.434415	0.0150259	1	-0.00286833
WISP1	0.480662	-0.0114442	1	-0.000764633	0.890611	0.00443753	0.83019	0.0076504	0.493289	0.0145065	0.0889292	-0.0255233	0.419809	0.0154086	0.900528	0.00608303	0.0624882	-0.027151	1	-0.00154712
NDRG1	0.55274	-0.0101	5.58272e-08	0.0611444	0.0124899	0.0300752	0.000446485	0.042875	0.0162979	0.032623	0.505301	0.0143247	0.926134	-0.0052549	0.871716	-0.00670949	0.0186821	-0.0321421	2.44264e-08	0.0633302
4930550C14RIK	0.757981	-0.00651905	0.877357	0.00471272	0.0832368	-0.0222345	1	-0.0030895	1	-0.00026917	0.594504	-0.0126408	0.869682	-0.00656964	0.491938	-0.014044	1	-0.00233258	0.259205	0.0176038
MAN2B1	0.373107	-0.0136144	0.261579	-0.0168347	0.58115	-0.00973819	0.718077	0.00976151	1	0.0029921	0.711642	-0.0104034	0.592143	0.0120216	1	-0.00188856	0.699419	-0.00979669	0.690375	-0.00920524
KLF5	0.569934	-0.00980074	1.93586e-17	-0.0924754	6.24302e-09	-0.0640588	2.05159e-06	0.0552414	0.594364	0.0125837	0.314006	0.0181871	0.739524	0.00916499	0.864427	-0.00686825	0.0935466	0.0252247	2.32244e-18	0.0956894
WDR83	0.304653	0.0151239	0.23623	-0.0175288	0.723345	-0.00739573	0.918417	-0.00572114	0.97947	-0.00481398	0.423781	0.0158447	0.838288	-0.00716727	0.861675	0.00692277	0.270095	-0.0189074	0.988578	0.0034407
PRDX2	0.767123	0.00635697	1.38659e-06	0.0549661	1.12359e-35	-0.132699	0.99054	0.00393973	0.0897328	0.0254913	5.71128e-09	-0.0668876	1.69098e-13	0.0820538	0.901489	0.00606048	0.909508	-0.00535355	0.00397332	0.0357583
POLR2A	0.00273216	0.0357334	0.263073	0.0167943	0.482801	-0.011441	0.966635	0.00455751	0.280985	0.0189264	1	-0.00100549	1	0.00150906	0.434036	-0.0152064	1	0.00122883	0.405131	0.0143492
SHBG	1	-0.00213357	0.191501	0.0188516	0.3893	0.0131861	0.987847	0.00400613	1	0.00320717	0.991005	0.00406684	0.749537	-0.00897333	0.99002	0.00384154	0.919721	-0.00511467	0.95402	0.00430311
SENP3	8.13694e-08	-0.0599404	0.810204	-0.00594469	4.99262e-08	0.0603558	1	0.00170056	0.487349	-0.0146085	0.0396761	0.0291531	0.180685	-0.0214982	0.853631	-0.00707381	1	-0.000188557	0.00864985	-0.0331764
CORIN	0.298043	0.0152821	0.400892	0.0136474	1.52405e-33	-0.128605	0.380888	0.0159501	0.299588	0.0184833	0.895713	0.00655046	0.0238412	-0.0309912	8.17065e-11	-0.0734908	0.374775	-0.0163551	3.58432e-05	0.048591
PLEKHA8	5.47938e-07	0.0562865	0.00887111	0.0325021	0.574758	0.0098477	0.0482321	-0.0274555	0.0174448	-0.0323922	0.853493	-0.00752239	0.323685	-0.0175447	0.703332	0.0100126	0.497981	0.0137572	0.000418417	0.0424004
SPC25	0.547889	0.0101867	1	0.00103846	2.86578e-23	0.106633	0.000183332	-0.0451889	0.0886616	-0.0255462	0.911077	-0.00620728	0.189711	-0.021172	0.42117	0.0154751	0.629439	-0.0111741	0.0349205	0.0278626
DNAH2	0.405191	0.0129469	0.143168	0.0205653	2.11372e-15	-0.0859749	0.861434	0.00698438	0.316175	0.0181022	0.500506	0.0144264	0.807446	-0.00779747	0.00378324	-0.0374441	0.539895	-0.0129299	0.0116597	0.0321134
RIPK4	1.88534e-75	-0.193156	1.15609e-10	-0.0715036	0.166489	0.0186418	0.945923	0.00505667	0.686977	0.0109527	0.452832	0.015302	0.000451805	-0.043395	0.236318	-0.0198627	0.128981	0.0235323	1	-0.002638
UFD1L	0.634604	-0.00866416	1	0.000750477	0.166466	0.0186429	0.100567	0.0240681	0.688937	0.0109011	0.999269	0.00386982	1	0.00307759	0.353233	0.0169989	0.657705	0.0106259	0.96723	0.00398384
ZFP287	0.0164826	-0.0296075	0.0419319	0.0265403	1	0.000999437	0.804163	-0.00815598	1	-8.61741e-05	1	0.0013759	1	0.00110965	0.521516	-0.0134625	1	0.00173511	1	-0.000611555
PRLR	1	0.0010573	0.100945	0.0224472	2.11608e-34	-0.130271	0.207779	0.020078	0.0185019	0.0321812	0.902768	0.00640219	0.345148	-0.0170223	0.00364246	-0.0375587	1	-0.00150199	0.332941	0.0158696
LETM1	0.0919172	-0.022212	0.602195	-0.00975561	1.02098e-11	0.0743093	0.878534	0.0065827	0.381117	0.016708	0.940756	0.00544219	0.796448	0.00801556	0.953678	0.00473689	0.104657	0.0246346	0.0296301	0.0285369
UBQLN1	4.54044e-10	-0.0688752	0.565979	-0.0104204	1.21264e-10	0.0705452	0.614824	-0.0116071	0.0713881	0.0265839	0.00383862	0.0375504	1	0.00279828	0.930661	0.00533502	0.869311	-0.00625856	0.204071	-0.0190828
FGFR4	1.59553e-12	0.0774191	4.41444e-20	-0.0994354	0.772344	0.00652394	8.48161e-129	0.251562	5.11834e-33	-0.128905	5.72026e-10	-0.0706213	0.092493	-0.0251067	0.995589	0.00368844	0.179368	-0.0216053	0.233334	-0.0182778
CADM3	1.62394e-17	-0.0923043	0.0199142	-0.0295543	0.303228	-0.0149682	0.000288014	0.0440189	0.0103243	0.0342483	0.485223	0.01471	5.0265e-06	-0.0539041	0.329822	-0.0175378	0.212834	0.0205295	0.108614	0.0226294
TXN2	0.604738	0.00917539	0.0335916	0.0274756	2.22257e-36	0.134021	0.0796886	-0.025208	0.220585	-0.0205434	0.057957	0.0275197	0.393536	0.0159616	0.147178	-0.022688	0.0128663	0.0335185	0.0543606	-0.0259612
SLC1A6	1.52302e-17	-0.0923806	0.00218232	-0.0370581	0.629567	0.00891896	0.669259	-0.0106597	1	0.00329344	1	0.000502171	0.98274	-0.00389506	0.295236	0.0183449	0.178274	0.0216419	0.410664	-0.0142414
SLC1A3	1.58462e-73	0.190698	2.30051e-06	0.0539299	0.0279148	-0.0270149	1.79473e-30	-0.123518	2.89617e-11	-0.0749143	0.47898	-0.0148278	0.791928	0.00811224	9.20781e-08	-0.061868	0.593534	-0.0118618	0.936029	-0.00470173
CRBN	0.0294621	0.0273381	0.754374	0.00695519	2.14414e-07	-0.0576303	0.514473	0.013356	0.678748	0.0110894	0.731238	0.0100601	1	-0.0024356	1	-0.0022105	1	-0.00164335	0.895578	-0.00557529
IL5RA	1		1		1		1		1		1		1		1		1		1
MSH6	0.814005	-0.00557016	0.37562	-0.0141825	1.49771e-22	0.104918	0.00955627	-0.0336538	0.622435	-0.0120589	0.908653	-0.00625916	0.384121	0.0161538	0.795462	-0.00824043	0.00678576	0.0357324	1	0.000719611
FBXO11	0.551282	-0.0101228	0.71439	-0.00768819	0.658365	-0.00845821	0.979803	0.00423312	0.014317	0.0330916	0.382105	-0.0166839	0.692744	-0.0100801	0.997279	0.00362422	0.0348038	-0.029704	0.195172	0.0193594
MLXIPL	0.000732654	-0.0396403	0.778193	-0.00652638	0.0626478	0.0235589	0.595523	-0.0119549	1	-0.000166762	1	0.00248495	0.152409	-0.0224925	0.0350548	-0.029532	0.781139	0.00810225	1	-0.00147786
TBL2	0.187288	0.0183224	0.0653226	0.0245705	0.000224297	0.0422514	0.0371194	-0.0285671	0.495567	-0.0144633	0.436747	-0.0156025	0.392085	-0.0159898	0.961665	0.00454956	0.712653	0.00951621	0.431381	-0.0138335
WBSCR22	6.38189e-10	-0.0683294	0.758009	0.00688915	1.82152e-19	0.0971987	1	-0.00336117	0.60659	-0.0123586	0.247649	0.0198051	0.141036	-0.0229278	0.486082	-0.0141749	0.0038496	0.0375397	0.38296	0.0147925
NID1	5.0711e-25	0.110934	1.44657e-45	-0.150457	2.60674e-07	-0.0572517	4.99675e-83	0.203071	1	0.00363586	8.85163e-16	-0.0892545	0.000117748	-0.0468195	1	-0.00286299	0.403688	-0.0157198	0.00276991	0.0368989
MCM5	1	-0.00110126	0.966885	-0.00298983	3.16598e-34	0.12993	0.785873	0.00849841	0.991235	-0.00448659	1	0.00252209	0.00235125	0.0387529	0.928157	0.0054077	4.03464e-06	0.0546741	0.129068	-0.0217094
HMOX1	1.16037e-22	0.105445	2.43521e-29	-0.120578	3.80299e-10	0.0687325	2.07938e-52	0.161878	1.00286e-06	0.057268	2.20777e-07	-0.0604059	0.960133	0.00443654	1	-0.00168568	0.00747809	0.0354223	1.71367e-51	0.160625
MPRIP	0.00417428	0.034382	3.92354e-05	0.0477198	0.0192377	0.0284707	0.961886	-0.00467415	0.788693	-0.00903333	0.57032	-0.0131267	0.352117	-0.0168663	0.684465	-0.0103979	1	-0.000829317	0.410784	0.0142377
CIC	0.000364694	-0.0415573	0.111979	-0.0218926	0.794054	-0.00616091	0.11006	-0.0236168	0.300611	0.0184644	0.681742	0.0109737	0.337931	-0.0171999	1	-0.00309526	0.339954	0.017153	0.895613	-0.00557431
PAFAH1B3	0.396488	0.0131282	2.58658e-06	-0.0536868	1.06205e-45	-0.15038	0.0398777	0.0282695	0.543384	0.0135383	0.00030875	-0.0446664	3.87969e-05	0.049447	0.238931	0.0197828	0.000187695	-0.0459919	0.0690794	0.0248585
IL27RA	0.222344	0.0172328	0.19707	-0.0186811	1	0.00211825	1	-0.00333765	0.00843922	0.0349403	0.621448	-0.0121376	1	-0.0029469	1	-0.000410856	0.91153	-0.00530405	0.401718	-0.0144163
PRKACA	0.0298049	0.0272923	0.746547	0.00710864	0.64169	-0.00872304	0.828277	0.00769601	0.16364	0.0223226	2.32992e-07	-0.0602998	0.471666	0.0143665	1	-0.00293204	0.34759	-0.0169775	0.0764481	0.0243847
ASF1B	0.845629	0.00505058	0.198851	0.0186245	6.76878e-15	0.0844702	0.987847	-0.00400573	0.241203	-0.01994	0.430654	-0.0157168	0.386231	0.0161113	0.926731	0.00549085	0.00303874	0.0382932	0.160104	0.0205275
MYL10	1		1		1		1		1		1		1		1		1		1
DDX39	0.0173313	-0.0294181	3.60343e-08	0.0619424	1.97819e-96	0.217974	0.846246	-0.00729061	0.00471035	-0.0367999	0.000219747	0.0455476	0.408038	0.0156559	1	-0.000810088	6.86985e-07	0.058218	0.0258629	-0.0291043
DNAJB1	0.441425	-0.0122127	1.47806e-07	0.0593376	0.0182316	0.0286749	1	-0.00103351	0.177109	0.021874	1	-0.00348256	0.0580494	-0.0273066	1	0.00251111	0.166111	0.0220742	0.0138214	0.0314893
MSH4	0.340584	-0.0143096	0.916428	0.00398412	0.644583	0.00867904	1	0.00321334	1	0.00204332	0.66105	0.0113921	0.553176	-0.0127305	0.980075	-0.0041143	0.63759	0.0110159	1	-0.000165185
USP40	1	-0.000736494	0.741327	-0.00720709	0.407877	0.0128113	0.647129	-0.0110382	0.28115	-0.0189213	0.534511	-0.013794	0.688432	-0.0101571	0.932038	-0.00529772	0.855683	-0.00655706	0.164982	0.0203425
EVX1	0.193415	-0.018117	0.0152633	0.0305614	0.00205593	0.0360491	0.932268	0.00538282	1	0.00249765	0.974752	-0.00450468	0.882761	0.00623408	0.00205722	-0.0393057	0.0711287	-0.026548	0.00201847	0.0378796
KBTBD4	0.992925	0.00246938	0.411195	0.0134418	0.975944	0.00274622	0.49476	-0.01372	0.206098	0.0209646	0.05429	-0.0278245	0.998619	-0.00342113	0.314659	-0.0178867	0.471609	-0.014283	0.141555	0.021221
CELF1	0.376221	-0.0135452	0.0296706	-0.0279887	0.0131917	0.0298789	0.625115	-0.01143	0.994753	-0.00438167	0.984855	0.00421591	0.0931186	-0.0250729	0.75742	0.00898217	0.392604	0.0159434	0.0593643	-0.0255581
NDUFS3	1.67953e-05	-0.0491045	0.796402	-0.00619475	0.356756	0.0138194	0.00509822	0.035737	0.304147	0.0183871	0.909645	-0.00622872	0.396068	0.0159122	0.129287	-0.023438	0.518743	0.0133374	0.219883	0.0186442
POR	0.319543	0.0147843	0.546382	0.0107783	2.91994e-05	-0.0472647	0.00798094	0.034254	3.94008e-05	0.0495134	0.687303	-0.0108422	0.584095	0.0121607	0.382603	-0.0163126	0.000645173	0.0427548	0.279517	-0.0170973
IGF1R	0.328609	0.0145772	0.0138069	-0.0309368	7.448e-32	-0.125271	0.000248502	-0.0444195	0.851693	-0.00777528	7.71866e-07	-0.0579944	0.142302	0.0228723	0.0601831	0.0272393	0.000124507	-0.0469918	3.51377e-06	-0.0537637
INSR	0.746763	0.00671368	0.00826383	-0.0327404	0.00131171	-0.037391	0.599015	-0.0118802	0.86001	0.00763407	0.611228	-0.0123374	0.765922	-0.00865414	0.953505	0.00475143	0.382368	-0.0161751	1	0.00130166
FCER2A	0.510721	-0.0108722	0.826752	0.00564404	0.304174	-0.0149483	1	-0.00360678	1	-0.00318116	0.930524	-0.00571259	0.98588	-0.00375547	0.144392	-0.0228036	0.786307	-0.00798652	0.764888	0.00786527
CYP2A5	1	-0.00221163	0.346857	-0.0148117	0.934779	0.00356621	0.970801	-0.00446246	0.984254	-0.00468561	0.457886	0.0152043	0.620745	0.0114616	0.583628	-0.0122837	0.357091	-0.0167603	1	0.00211544
ATP4A	0.247498	-0.016531	0.0148999	0.0306485	0.00323641	0.0346329	1	0.00349869	0.664248	-0.0113378	1	0.000100592	1	-0.00117865	0.636915	-0.0113128	1	-0.000872837	1	-0.00152272
TRIM28	0.172691	-0.0188034	0.308195	0.0156891	1.09786e-10	0.0707002	0.0798235	-0.0251954	1	0.00148539	0.562263	0.0132897	0.124615	-0.0235969	1	-0.00211075	0.62746	0.0112105	0.764993	-0.00785942
UBE2M	0.238659	0.0167726	3.62531e-09	0.0659436	1.70549e-14	0.0832624	7.54271e-08	0.0615921	0.291571	0.0186649	4.04102e-06	0.0546791	0.0199038	-0.0316549	0.0599993	0.0272524	7.53904e-05	0.0481993	0.56437	0.0113956
ADCY9	0.533756	0.0104441	1	0.001574	0.859887	0.0050001	1	0.00158494	1	0.00249239	0.672704	-0.0111628	0.774007	0.00845294	1	0.000849713	0.764164	0.00842807	0.0228866	0.0295843
MEF2C	1.02239e-100	0.222622	1.26208e-92	-0.213813	1.07783e-13	0.0807781	0.0640557	-0.0262175	4.21338e-109	0.232398	0.24284	0.0199381	0.441024	0.0149894	6.24369e-10	-0.0703281	6.29483e-11	0.0740273	4.36367e-05	-0.0481332
CTR9	0.0113819	0.0309605	0.000216126	0.0435185	0.111618	-0.02078	0.849108	-0.00723237	0.978762	0.00482968	0.0787057	-0.0261155	0.384474	0.0161467	1	-0.0030926	0.105481	0.02459	0.832059	0.00672492
EIF4G2	7.82587e-31	0.123394	0.12947	0.0211157	1.77274e-11	0.0734877	0.00716981	-0.0346035	0.628927	0.0119329	0.765434	0.00937867	0.00517274	-0.036267	0.216108	0.0204228	0.769352	-0.008336	0.703902	-0.00895612
MRVI1	0.894903	-0.00421211	0.681796	0.00829092	0.885493	0.00452772	0.959212	0.00472673	1	0.00343847	1	0.00118295	1	0.000932634	1	0.00100108	1	-0.000203115	0.970842	-0.00387124
PCYT1A	0.339339	0.0143384	0.0195031	0.0296372	0.0453837	-0.0250001	0.0944296	-0.0243988	0.728718	-0.0102008	1	-0.00100117	0.445624	0.0149085	1	0.00112678	0.391604	-0.0159645	0.00656767	0.0341125
ZFP592	0.115336	-0.0210526	0.610905	0.00960564	0.0224956	-0.0278648	0.311345	0.0174539	0.506938	-0.0142542	0.917463	-0.00606517	0.493629	-0.0139277	0.884908	0.00643792	0.675038	-0.0102551	0.549493	0.0116581
PSMD4	0.0738968	-0.0232878	0.00829128	0.0327295	1.88142e-07	0.0578843	0.614824	0.0116083	1	0.00043687	0.565733	0.0132185	0.641874	0.011039	1	0.000487223	0.230076	0.0200105	0.607537	0.0106398
TMOD4	0.864794	-0.00473697	0.388121	0.0139122	0.913576	0.00399726	1	0.00285567	0.694008	0.0108117	1	0.00179207	1	-0.00159575	0.93623	-0.00517148	0.932831	0.00483685	1	0.000440714
INSRR	0.61095	-0.00907064	0.515936	-0.0113836	0.00309157	-0.0347795	0.79817	0.00828577	0.994454	-0.0043979	1	-0.000755088	0.37928	-0.0162804	0.379288	-0.016398	1	-0.000486406	0.99518	0.00331418
CABP5	1	-0.000386314	1	-0.0018245	0.281572	0.0154726	0.591095	0.0120198	0.450643	-0.0152882	0.84518	-0.00772094	0.962768	-0.00437134	1	0.00336337	0.921969	0.00507592	0.309675	0.016384
SNX6	1.93457e-12	-0.0771442	0.11864	0.0215934	0.69172	-0.00791426	5.10958e-08	0.0622992	0.371331	0.0169124	0.967674	-0.00473515	0.641388	-0.0110495	0.628735	0.0114677	0.324639	-0.0174877	5.93037e-08	0.061729
MTHFD2	1.35408e-18	-0.0952097	1.07289e-24	0.110507	1.1739e-33	0.128825	0.155305	0.0217673	0.871388	-0.00739186	2.87122e-06	0.0553837	0.214525	0.0203861	2.46059e-05	-0.0506774	0.245973	0.019558	0.497317	-0.0126083
KIT	0.385952	0.0133467	5.2817e-49	0.156022	0.327346	0.0144394	0.00817651	0.0341762	0.00292662	0.0382575	1	0.00139658	7.59775e-11	0.0733641	6.36409e-16	-0.0895399	0.284011	-0.0185531	5.91721e-05	-0.0474094
TOMM40L	0.539524	-0.0103433	0.181747	0.0191715	0.065921	0.0233215	0.770368	0.00879018	1	0.00388416	0.95034	-0.00520966	0.352651	0.0168515	0.993546	0.00375262	0.783739	-0.00804325	0.209805	0.0189229
NR1I3	1	-0.000251775	0.881771	-0.0046362	0.308716	0.0148411	0.948559	-0.00499747	0.272733	0.0191318	0.784869	0.00897786	0.806167	-0.00782193	1	0.00142024	1	-0.000826909	0.790836	-0.00740331
APOA2	0.834081	-0.00523993	0.549477	-0.0107159	0.944688	0.00337888	1	-0.00212157	0.612454	0.0122533	0.898686	-0.00648989	1	0.00305822	1	-0.00290316	0.811875	-0.00748762	0.9548	-0.00428489
PAN2	0.544897	0.010237	1	0.00148341	0.938103	0.00349734	1	0.00137092	0.227629	0.0203569	0.918968	-0.00601338	0.658916	-0.0107284	0.697183	-0.0101203	0.0624882	-0.0271496	0.0804099	0.0241322
CS	0.928979	0.00362928	0.141902	0.0206104	8.9852e-08	0.0592732	1	-0.000172584	0.82622	0.00830789	1	-0.000697428	0.42641	0.0152564	0.863428	0.0068926	0.865288	-0.006338	0.682181	0.00936465
AMPD3	0.338049	0.0143679	0.688733	0.00816475	0.0042025	-0.0337997	1	9.23394e-05	0.694944	-0.0107933	1	-0.00210022	0.722942	-0.00949456	0.0562298	-0.0275295	1	0.00279903	0.227646	0.0184282
BCAS2	0.0702095	-0.0235393	0.617376	0.0094853	2.94803e-07	0.0570135	0.740262	-0.00936383	0.278188	0.0190009	1	-0.00119969	1	-0.00166233	0.390529	-0.0161265	0.499082	0.0137292	0.037454	-0.0275623
SH2D1A	0.477935	-0.0114973	1	0.000611732	1.70471e-06	-0.0535019	1	0.000497452	1	0.00115501	0.89278	-0.0066447	0.543213	0.0129292	0.953678	-0.00473767	0.873007	-0.00617756	0.693861	0.00912896
CTCF	0.664749	0.00812409	0.701054	-0.00794229	2.38551e-13	0.0796794	0.000250214	-0.0443998	0.206681	-0.0209457	1	-0.000363123	0.00115501	0.0408338	0.393993	0.0160556	0.998286	-0.00316937	0.00770117	-0.0335725
PARD6A	0.631949	0.0087096	0.789133	0.00632668	0.838154	-0.00538853	0.335075	-0.0169182	0.480768	0.0147285	0.993603	0.00401119	0.622434	-0.0114147	0.37181	-0.0165624	0.890165	-0.0057714	0.747483	-0.00817764
AGRP	1	-0.000135147	1	-0.00192012	1	-0.000624993	1	0.00308314	1	0.00325542	1	-0.000673529	0.996016	0.0035101	1	0.00341805	0.72055	0.00937459	0.781637	-0.00756563
PVALB	0.320518	0.0147614	0.0252006	0.0286382	0.932807	0.00361826	0.818788	-0.00788306	1	-0.00305859	0.558242	-0.0133678	0.564069	0.0125496	0.766444	0.00879376	0.9283	0.00494213	0.470051	-0.0131153
TFAP4	1	0.000293314	0.018839	-0.0297695	2.00407e-05	0.0481341	0.00219991	-0.0383641	0.0126899	-0.0335254	1	-0.000543276	0.678627	0.0103395	1	0.00137571	0.0151113	0.032915	3.4412e-12	-0.0774334
RANBP1	3.2516e-06	-0.0526676	0.01209	0.0314104	8.43363e-156	0.275266	2.97657e-05	-0.0495077	0.0963826	-0.0251447	0.0616912	0.0272444	0.0128457	0.0332487	0.502124	0.0138452	4.32162e-07	0.0591201	1.55056e-06	-0.0554715
CD247	0.747288	0.00670371	0.194437	0.0187637	1.93526e-08	-0.0620643	1	3.13195e-05	0.147236	0.0229093	0.384294	-0.0166172	0.12877	0.0234196	0.185387	-0.0213562	0.184048	-0.021429	0.926545	-0.00489602
RFX5	0.00856928	-0.0319742	0.0062698	-0.0336713	0.737139	-0.007158	0.247378	-0.019011	0.80289	-0.00877775	0.290897	-0.0187123	0.923203	-0.0053181	0.409238	-0.0157285	0.832783	0.00705574	0.00326934	0.0363753
PSMB4	0.16079	-0.0192199	0.099057	0.0225444	0.715706	-0.00752698	0.413802	0.0152896	0.675514	0.0111429	0.812641	0.00838467	0.17361	0.0217334	0.582013	-0.0123161	0.671623	0.0103389	0.784178	0.00752865
SLC30A4	0.278223	0.0157547	0.584649	0.0100746	0.404452	0.0128833	0.439113	0.014766	1	0.00107768	0.941627	0.00543047	0.0340246	-0.0296029	0.932706	0.00527796	0.617788	-0.0113978	0.0111477	0.0322791
SQRDL	0.205252	-0.0177448	1	0.00184179	0.00257252	-0.0353596	0.0102246	0.0334154	0.551867	0.0133709	0.823788	0.0081647	0.0319437	-0.0298644	0.00828381	0.0348614	0.0653694	0.0269386	0.901824	-0.00545954
BLOC1S6	0.830812	-0.00529478	0.739805	-0.00723783	0.163598	0.0187351	1	0.0019055	0.284834	0.0188296	0.581699	0.0128985	1	0.00299912	0.467978	-0.0145184	0.244565	0.0196008	0.897069	-0.00554657
METAP1	0.434459	-0.0123537	0.000951279	-0.0394998	1.80178e-05	0.048376	0.252013	0.0188853	0.927802	-0.00619515	0.857857	0.00742252	0.670856	-0.0104857	0.723862	-0.00962658	0.672244	-0.0103246	0.286392	-0.0169165
GPR108	1	0.00213783	0.80791	-0.00599212	0.00403663	-0.0339285	1	0.00114358	0.282855	0.018881	1	0.00376425	0.776281	-0.00840137	0.64842	-0.0110933	0.746301	-0.00879391	0.734525	0.00841159
TNFSF14	1		1		1		1		1		1		1		1		1		1
GATA6	0.790692	-0.00595618	0.00368496	-0.0354106	0.614986	0.00916876	1	-0.00172352	0.639508	0.0117567	0.751232	-0.00966898	0.543913	0.0129108	1	-0.00184145	0.410809	-0.0155567	0.086796	0.0237581
RSL1D1	0.000508804	-0.0406508	0.31451	0.0155515	1.57463e-113	0.2361	0.370386	-0.0161704	0.296786	-0.0185486	3.22315e-16	0.090506	0.0515422	-0.0278405	0.472287	-0.0144292	3.2078e-06	0.0551488	5.03241e-30	-0.122762
APC	0.0593541	0.0243225	0.864412	-0.00494234	1	-0.00111256	0.251724	-0.0188927	0.947575	0.00569875	0.962278	0.0048943	1	-0.00103416	1	0.00315787	0.597606	-0.0118034	0.876918	-0.0059123
REEP5	0.905489	-0.00402393	1.13212e-17	-0.0931094	0.0153769	-0.0293123	6.81568e-06	0.0527412	1	0.00205098	1.15395e-10	0.073117	3.30465e-30	-0.123236	1.25651e-05	0.0521654	0.319101	0.0176289	0.792587	-0.00737743
ERGIC3	0.0435096	0.0257034	0.28901	0.0161388	2.283e-05	-0.0478374	0.000686539	0.0417001	0.251337	0.0196792	0.612104	-0.0123202	0.946931	-0.00473739	0.00641568	-0.0357168	0.872163	-0.00619411	0.31001	0.0163758
UQCC1	0.530972	-0.0105034	0.0239466	0.0288419	0.138529	0.0196452	0.545256	-0.012794	1	-0.0040395	1	-0.00370947	0.983502	0.00387988	1	0.00319803	1	0.000874574	0.851642	0.00636785
SPO11	0.115851	-0.0210288	0.0603803	-0.0249415	1	-0.00176239	1	0.000698039	1	0.00146432	1	-0.00331154	0.152409	0.022495	0.0873744	-0.0254558	0.00490638	-0.036766	4.48615e-06	0.053243
NCOA2	0.074551	-0.0232453	0.835635	-0.00547604	0.00593648	-0.0326692	0.929946	-0.00545566	0.28115	-0.0189202	0.293696	-0.0186344	0.00372928	0.0373296	0.0483778	-0.0281683	0.95941	-0.00414991	0.961451	0.00414115
TRH	0.000183698	-0.0433515	1.80361e-146	0.267277	1.06293e-23	0.107652	8.12808e-63	0.177048	1.90434e-34	0.131657	1.82012e-06	0.0563005	0.0820924	0.0256997	0.150179	0.0225695	1.52173e-61	-0.175961	0.00111676	-0.0396426
NR2C2	0.0242501	-0.0281008	0.890387	0.00447531	0.976334	0.00273339	0.0400131	-0.0282558	1	-0.00114899	0.00120393	-0.0409852	1	-0.0022785	0.84435	0.00728717	0.43917	-0.0149282	0.0801551	-0.0241461
NR2C1	0.279371	0.0157267	0.087599	0.0231509	0.0487681	-0.0246839	0.986002	-0.00405505	0.626297	-0.0119793	0.689788	-0.0107994	0.6959	-0.0100196	0.156598	-0.0223265	0.935546	0.00477325	1	0.00149562
SMPD4	0.624054	-0.0088489	1	-0.000620641	0.000868177	0.038579	0.0242483	-0.0302392	0.321253	0.0179772	0.84518	0.00772139	0.736436	0.00923373	0.991946	0.00379697	0.671547	0.0103491	0.584577	-0.0110498
PEX1	0.513181	-0.0108249	0.534708	0.0110151	0.813681	-0.00581951	1	-0.00202304	0.399194	-0.0163472	0.376498	-0.0168032	0.570741	0.0124157	0.961608	0.004552	1	-0.00112645	0.358517	0.0152988
OTX1	2.94397e-307	-0.379534	1.33321e-125	0.248095	1.33916e-18	0.0949227	6.18151e-113	0.236018	3.27019e-79	0.198767	1.42914e-78	0.19849	9.01855e-103	-0.225575	2.70449e-30	0.12372	1.02333e-43	0.148666	1.05923e-14	-0.0853478
KCTD20	0.194291	0.0180889	0.952632	-0.0032571	0.020495	0.0282313	0.472807	0.0141281	0.607751	0.0123393	0.862592	0.00732407	0.923558	0.00531129	1	0.00170323	0.613774	0.011477	0.717299	-0.00872368
ITGAE	0.10611	0.0214832	0.541015	0.0108904	0.295007	0.015157	1	-0.00302542	1	1.0732e-05	0.738891	-0.0099053	0.941551	0.00487613	0.492147	-0.0140388	0.790784	0.0078962	0.419766	0.0140632
CTNS	0.606381	0.00914544	0.890773	0.00446369	0.023498	-0.027697	0.0209251	-0.0308034	0.740521	-0.00996401	2.60568e-05	-0.050639	0.871055	0.00652024	0.927708	-0.00543581	0.869156	-0.00626484	0.715931	0.00874764
P2RX5	0.887652	0.00435294	0.00864629	-0.0325882	0.643701	0.00869234	0.125637	0.022924	1	0.00309412	0.571049	-0.0131067	0.291604	-0.0183249	1	0.00297994	0.743201	0.00886674	0.938549	0.00463234
SHPK	0.806938	-0.00568517	0.600588	-0.00980272	0.0907724	-0.0218104	0.918796	-0.00571309	0.822207	0.00839045	0.591052	-0.012717	0.553389	0.0127231	0.27613	-0.0188388	1	0.00189724	0.0632646	0.0252692
TRPV1	0.462419	-0.0117873	0.645705	-0.00894864	1	0.000386533	1	-0.00336288	1	-0.00259911	0.967949	-0.0047174	0.740775	0.00914141	1	-0.000480964	0.643576	-0.0109084	1	0.00288898
EPHB3	0.750671	-0.00664219	0.0487177	0.0258893	1.32105e-22	-0.10505	1.4365e-16	0.0907989	2.4842e-19	0.0985893	0.0349875	-0.0296665	0.0551095	-0.0275512	1	-0.00220545	0.0329976	-0.0299122	0.651352	-0.0098958
TUFT1	0.741391	0.00681222	0.00968779	0.0321964	1	4.93541e-05	0.122845	0.0230373	0.957622	0.00541397	0.520065	0.0140707	0.785138	0.00824632	0.796066	-0.00821659	0.582956	-0.0120709	0.99994	-0.00321017
RCN1	1.4527e-30	0.122843	1.40805e-73	-0.19091	0.17252	-0.0184411	3.74509e-58	0.170444	0.471675	0.0148959	0.0391622	0.0292089	6.13253e-28	-0.118513	0.0205033	-0.0316119	0.000758483	0.0423094	7.52181e-05	-0.0468171
DNASE1	0.949809	-0.00325472	0.101656	-0.0224105	0.307607	-0.0148651	0.808689	0.00807562	0.958636	-0.00538792	1	-0.000400881	1	0.00243812	1	0.0031066	1	-0.000244934	0.979664	-0.00367807
TRAP1	0.0174138	-0.0293999	0.795612	0.00620851	2.97827e-09	0.0653255	0.904834	0.00604355	0.556359	-0.0132814	0.339395	0.0175929	0.695687	0.0100245	0.170768	-0.0218367	0.818964	0.00734765	0.196701	-0.0193112
NAA60	0.624224	0.00884632	0.356517	0.014587	0.00367539	0.0342278	0.685016	-0.0103606	1	0.00405073	0.831711	0.00799991	0.608353	0.0116905	0.87639	0.00659266	0.657606	0.0106298	0.693052	-0.00914552
1700037C18RIK	0.579882	-0.00962263	1	-0.00109272	0.114113	0.0206632	1	-0.000371457	1	-0.00131787	0.771003	0.00927747	0.196608	-0.0209228	1	-0.00278121	0.634123	0.0110793	0.798807	0.00727706
ANKRD13D	0.818425	-0.00550258	0.00145602	0.0382688	1.71395e-10	-0.0700023	7.9869e-05	0.0472278	0.000136257	0.046566	1	-0.00141717	0.771438	-0.00851273	0.000242878	-0.0452094	0.266838	-0.01899	0.4901	0.0127396
TYRP1	0.367287	-0.0137324	0.184768	0.0190719	0.121581	0.0203358	0.360657	0.0163774	0.509679	0.0141896	0.275004	0.0191005	0.0550574	-0.0275557	0.911273	0.00584214	0.994443	-0.00327275	0.60371	0.0107165
TPR	0.000576831	0.0403107	0.0551458	-0.0253483	1.02291e-07	0.0590331	0.0798943	-0.0251896	0.427365	-0.0157673	1	0.00321834	0.672278	-0.0104543	0.903608	-0.00600535	0.0459207	0.0285119	0.885649	-0.00575422
BC003331	0.0483375	0.025247	0.894825	0.00436779	0.203313	-0.0174955	1	0.00143923	0.487349	0.0146094	1	-0.00152842	0.401897	-0.0157875	1	0.00247692	0.855282	-0.00656418	1	-0.000495933
PRG4	0.932539	0.00356941	0.892662	-0.00441509	0.511261	-0.0109458	1	-0.000765733	0.748167	0.00980099	0.632721	0.0119478	0.363994	0.016608	0.909299	0.00588635	1	0.00284397	0.961926	-0.00412683
DHX34	0.366522	-0.0137473	0.206817	0.0183868	0.664537	0.00835603	0.0903382	0.0246255	0.0139155	0.0331948	1	-0.00183923	0.906938	-0.0056717	1	0.00325948	0.613101	-0.0114963	0.998945	-0.00322756
KPTN	0.399843	-0.0130603	0.531709	0.0110713	0.532149	-0.0105692	0.276176	0.0182792	0.826968	0.00827988	0.891362	-0.00668806	1	-0.00205971	0.215293	-0.0204439	1	0.00233242	0.00386284	0.0358526
NAPA	0.71281	0.0072893	0.671001	-0.00849248	0.771041	0.00655742	0.930834	0.00541612	0.689852	-0.0108835	0.719711	0.0102704	0.937695	-0.00498761	0.0671903	-0.0267333	1	-0.00280183	0.455062	0.0133956
SRA1	0.169721	0.0189031	0.21268	-0.0182029	0.521356	-0.0107671	0.28743	0.0179996	0.86444	0.00753688	0.0528463	0.0279486	0.702023	0.00990076	0.187192	0.0213006	1	0.00120838	3.95341e-06	0.053517
CALCOCO2	0.638171	-0.00860125	0.511276	0.0114787	0.211808	0.01725	1	0.00352295	1	0.00387979	0.966613	0.00477868	0.716442	-0.00961429	0.845698	-0.0072477	0.945557	-0.00451415	0.0506602	0.0262617
ATP5G1	0.704976	0.00742408	1.29402e-31	0.125225	5.24106e-94	0.215259	0.0113182	-0.033061	0.0874781	-0.0256159	0.000278253	0.0449353	0.904661	-0.00572019	0.982289	0.00402831	6.33419e-08	0.0626805	3.92617e-08	-0.0624848
SNF8	0.000219657	-0.0428945	0.310169	0.0156476	5.46594e-20	0.0985501	0.505265	0.0135208	0.330919	0.0177687	1	-0.00355626	1	0.00132332	1	0.000919318	0.795912	0.00780773	7.07208e-06	0.0522625
TBCB	1.92781e-06	-0.0537518	0.00171758	0.0377807	5.95775e-07	0.0556355	0.00913734	0.0338055	1	0.00309102	0.823416	0.00817053	0.245288	0.0195103	1	0.000716188	0.277242	0.0187153	1.07496e-07	0.0606364
INPP5K	0.196603	0.0180153	0.941868	-0.00350055	1.91523e-06	-0.0532627	0.550676	0.0127004	0.989982	0.00452306	1	0.00307872	0.873522	0.00645905	0.322933	-0.017685	0.691716	-0.00994225	0.231925	0.0183144
CRKL	1	0.000893201	0.781999	-0.00644745	1	-0.00153973	0.995703	0.0038188	1	-0.00209398	0.666785	-0.0112784	1	0.00026129	0.525692	-0.0133973	1	-0.00132844	0.613894	0.0105342
UPK3BL	2.07846e-35	-0.13235	9.51745e-05	-0.0455811	0.00350082	0.0343842	0.756985	0.00904831	0.981137	0.00476832	0.61175	0.0123266	0.267418	-0.0189382	0.761037	-0.0088935	0.542591	0.0128764	0.179848	-0.0198398
EPS8L1	0.967657	-0.0029284	0.552052	0.0106572	0.771117	-0.00655602	0.971597	0.0044373	1	-0.00237367	1	-0.00105289	0.562644	-0.0125751	0.806861	0.00800612	0.98596	0.00349631	0.0694214	0.0248359
CLINT1	0.00133013	-0.0379086	0.0580086	-0.0251169	8.27439e-11	0.0711404	0.762156	0.00894074	0.698296	0.0107388	0.023923	0.0311692	0.0306982	-0.0300168	0.0309403	-0.0300235	0.784536	0.00802124	0.918992	-0.00506701
PRSS16	0.99513	-0.00242088	0.222494	-0.0179206	0.57056	-0.00992563	1	-0.00143178	0.0183372	0.0322154	0.776555	-0.00913612	1	-0.00129944	1	-0.000873249	0.77811	-0.00815392	0.840425	0.00657356
CDKAL1	1	-0.000877083	0.828549	-0.00560606	0.396951	0.0130354	0.118379	-0.0232315	0.559943	-0.0132038	0.641013	-0.0117939	0.621369	0.0114494	0.132432	-0.0232816	1	-0.000968144	0.0973514	-0.0231937
RHOX6	0.818752	-0.00549613	1	0.000817823	0.949277	0.00329552	1	-0.00365501	1	-0.00345254	0.894335	-0.00660501	0.920657	0.00536921	0.577761	-0.0123937	0.906887	0.00540989	0.970544	-0.00388308
HTRA1	4.75276e-07	-0.0565725	0.96684	-0.00299094	0.0357007	0.0260142	0.078176	0.0253091	1	0.00181585	0.896127	-0.00653852	0.944535	-0.0048037	0.0040131	-0.0372456	0.000111748	-0.0472606	0.65629	0.0098082
ZBTB17	0.644465	-0.00849913	1	-0.0019229	1	-0.000958282	1	-0.00358448	0.500167	0.0143832	1	-0.000963264	0.58355	0.0121705	0.79284	-0.00831236	0.485341	0.0140076	0.906999	-0.00535697
CLCNKB	0.700972	-0.00748262	0.891079	0.00445731	0.520781	-0.0107782	1	-0.00174746	1	-0.00111636	1	-0.0011198	1	-0.000730991	0.572006	0.0125167	0.773196	0.00824708	0.95267	-0.00433872
FAM131C	0.443561	0.0121727	3.64445e-07	-0.0576091	0.893396	0.00438081	0.000268042	0.044215	0.0843498	-0.0258004	0.599508	0.012546	0.243241	0.0195719	1	0.00159253	0.31694	0.0176866	0.0271448	0.0289059
FBLIM1	4.89965e-10	-0.0687521	0.177556	-0.0193162	9.0388e-21	-0.100534	0.0268331	0.0298562	0.0569036	0.0276134	0.552124	-0.0134709	0.00037901	0.0438657	0.74594	-0.00919178	2.39101e-09	-0.0682897	8.43523e-19	0.0968665
HSPB7	0.892292	0.0042571	0.522803	-0.011266	0.957555	0.00312188	0.995954	-0.00381284	1	-0.000496659	0.829391	0.00804566	1	0.00337217	0.962264	-0.00453542	0.80926	-0.00754691	0.456604	-0.0133635
EPOR	1.84407e-19	-0.0974854	0.00635389	-0.0336279	2.53602e-07	-0.0573051	0.448531	0.0145874	1	-0.00243192	0.895686	0.00655324	0.471685	-0.0143633	0.116522	0.0239794	0.40483	-0.0156949	0.891235	-0.00564823
CCDC159	0.96004	0.00307653	0.985895	-0.00261027	0.406158	-0.0128454	0.489794	0.0138135	0.50902	0.0142061	0.553175	0.0134558	0.00892017	-0.0345146	0.742808	-0.00925245	0.467918	-0.0143548	1	-0.00286275
MOB1B	0.0104608	-0.0312694	0.495448	-0.0117903	0.0696267	0.0230724	0.497625	0.0136619	0.517513	0.0140279	0.0367841	0.0294647	1	-0.00200478	0.776774	0.00860447	0.514212	0.0134301	0.0528093	-0.026089
ATP6V1B1	0.754144	0.00657773	0.344839	-0.0148536	0.964973	0.00298436	0.950292	0.00492211	0.861311	0.00759138	0.815713	-0.00833038	0.881444	-0.00627397	0.980751	-0.0040998	1	-0.000336376	1	-0.00151854
VAX1	5.73457e-136	-0.25769	3.3207e-73	-0.190433	0.0471506	0.0248304	1.6268e-11	-0.0753479	2.53855e-06	-0.055399	4.27495e-20	-0.100868	3.95088e-66	0.181832	1.01039e-06	-0.0573154	6.23539e-181	-0.296795	5.79066e-27	0.116312
ATP6V1B2	1.15439e-45	-0.150418	1.01514e-15	-0.0876322	5.23885e-36	-0.133319	0.820505	0.00784779	0.0630254	0.0271498	0.000227869	-0.0454592	1.12135e-09	0.0691455	0.000442315	0.0436687	1	-0.000259534	0.0138889	0.03147
EPS15L1	0.0862091	0.022521	0.158514	0.0199909	0.29097	-0.0152484	1	0.00103689	0.121156	-0.0239627	0.0663855	-0.026916	0.716883	0.00960526	0.344878	-0.0171971	0.989682	-0.00338374	1	-4.77122e-05
TEP1	0.0346592	0.0266724	0.000178867	-0.0439918	0.0859364	-0.022076	0.467675	0.0142217	0.652675	0.0115484	0.0634574	0.0271098	0.000137963	-0.0464188	0.934199	-0.00524023	0.201489	-0.0208705	0.34784	0.0155375
TTC5	0.511112	0.010862	0.0678443	0.0243913	2.78086e-12	-0.0762108	0.0650979	-0.0261425	0.631802	0.0118787	0.889184	0.00674476	0.246599	0.0194746	0.908966	0.00589281	0.466594	-0.0143841	0.798467	-0.00728298
OSGEP	0.106538	0.0214647	9.13418e-06	0.0510034	6.85835e-08	0.0597727	1	0.00330078	0.457666	-0.0151493	0.167014	-0.0221927	0.226927	0.0200239	0.819486	-0.00775937	0.0481799	0.0282947	0.566192	-0.0113608
AAMP	0.0234473	-0.028234	0.487901	-0.0119383	0.104009	0.0211393	0.00565595	0.0353868	0.0153443	-0.0328389	0.170384	0.0220673	1	0.000507482	0.0431329	-0.0286616	0.620837	-0.0113383	0.655029	0.0098279
TMBIM1	0.196177	-0.0180291	1	-0.00082411	0.0285182	0.0269276	0.755655	0.00907527	0.00173361	0.0397906	0.153113	0.0226903	0.746544	-0.00904028	0.214245	-0.0204745	1	0.000650297	0.432945	0.0137961
ARPC2	6.69959e-08	-0.0602984	0.00204828	0.0372577	2.70827e-05	0.0474407	1.86952e-07	0.0599153	0.663595	0.0113602	0.851805	0.0075718	0.0378075	0.0291599	1.24811e-05	-0.0521808	0.0025095	0.0388639	1	0.002438
KMT2B	0.983897	0.00262893	0.71253	-0.00772081	0.428985	0.0124035	0.0150216	-0.0320449	0.806184	0.00871391	1	0.00156507	1	-0.00206935	0.836518	0.0074442	0.564488	0.0124508	0.266789	-0.0174146
ZBTB32	0.00806523	-0.0321844	1	-0.0022364	0.828593	-0.00555133	0.35181	0.0165749	1	-0.00371086	1	0.00284764	0.229183	-0.0199548	0.0329704	0.0297758	0.921525	0.0050817	1	-0.000301389
ETV2	1.90688e-24	-0.109618	5.40591e-06	-0.0521335	6.22528e-07	0.0555455	0.784981	-0.00852542	0.601911	-0.0124472	0.0922307	0.0253294	0.707276	-0.00979288	0.06636	-0.0267966	0.952802	0.00433334	0.156036	-0.0206736
UPK1A	1	0.00180293	0.41309	-0.0134041	0.962083	-0.00304074	0.813455	-0.0079909	0.448872	0.0153281	1	-0.00243444	0.827261	0.00740608	0.00640837	0.0357237	1	-0.00014163	0.72325	-0.00860778
TMEM147	1.56841e-10	-0.0705633	0.828541	0.00560672	1.17436e-06	0.0542661	0.83658	-0.00752003	0.853494	-0.00774	0.423514	-0.0158489	0.688745	0.0101499	0.735211	-0.00940092	0.0881172	-0.0255117	0.712427	-0.00880653
RPS9	0.889631	0.00430928	0.00210353	-0.0371747	1.21126e-25	-0.11212	0.171935	0.0212004	0.644531	0.0116751	0.000504035	-0.0433777	2.65037e-05	0.0502967	0.00992261	-0.0342234	4.86843e-05	-0.0492579	4.80869e-12	0.0769508
TFPT	0.00221024	-0.0363886	0.978404	0.0027538	0.485318	0.0114011	1	0.002024	0.603639	-0.012412	0.0764438	0.0262514	0.332763	-0.0173339	0.949556	0.00487751	0.769141	0.00834178	0.525527	0.0120987
SUSD2	0.539524	-0.0103424	0.963438	0.00304954	0.504654	-0.0110606	0.479434	0.0140063	0.667837	0.0112752	0.956674	-0.00502954	0.499028	0.0138178	0.104295	0.0245572	0.832595	-0.00706392	0.909881	0.00528526
GGT5	0.538239	-0.0103637	1	-0.000790232	0.993771	-0.00238782	1	0.00144628	1	0.00165731	1	-0.00177	0.599878	0.0118609	0.255732	0.0193437	0.966545	-0.00394756	1	0.0030303
GGT1	0.0122733	-0.0306873	0.643629	0.00898696	0.1642	0.0187156	0.375441	0.0160696	0.908463	-0.00665006	0.938182	0.00549449	1	-0.00186646	0.0965369	-0.0249578	0.403857	0.0157152	0.743936	0.00823361
CRIP2	2.7482e-09	0.0659173	0	0.492152	2.64381e-07	-0.0572241	2.13023e-102	0.225031	1.83387e-46	0.15275	4.67065e-14	0.0841821	0.0552679	0.0275389	0.277766	-0.0187946	0.000111174	-0.0472791	9.37647e-05	0.046272
CRIP1	2.55824e-20	-0.099679	1	-0.00198953	2.37609e-09	-0.0657105	3.66178e-14	0.0838278	1.36418e-05	0.0518504	2.06008e-08	0.0647185	0.0793685	-0.0258608	0.0108249	0.0339235	0.471106	0.0142956	2.04717e-08	0.0636425
CBFA2T3	7.74525e-13	-0.07844	3.54366e-07	-0.0576641	0.00856807	-0.0314138	0.926601	-0.00553176	0.438439	-0.0155385	0.822126	0.00819408	0.0843093	0.025576	0.0217971	0.0313819	9.70478e-10	-0.0697684	0.645373	0.00999537
FBLN1	4.20629e-10	-0.0689986	0.752249	0.00699773	1	0.000494023	1.22705e-12	0.0790508	9.29667e-12	0.0765795	0.954395	0.00511753	1.33582e-19	-0.0992228	0.126773	0.0235524	0.0279893	0.0305648	0.8244	-0.00684798
PGRMC1	0.00143949	0.0376732	4.98458e-08	-0.0613543	0.000758028	-0.0389625	1.27761e-18	0.0963526	0.151622	-0.02275	1.63148e-06	-0.0565145	0.572608	-0.012378	0.440601	0.0150623	0.0586052	-0.0274424	0.202927	0.0191204
GCAT	0.429234	-0.0124538	0.743899	-0.00716239	1.00142e-32	0.127007	1.77005e-22	0.105966	4.07808e-06	0.0544232	0.00387893	0.0375133	0.806291	-0.0078178	0.50716	-0.0137568	0.0295191	0.0303536	6.91488e-17	-0.0916529
TEK	0.0721257	0.0234107	0.0002855	-0.0427926	0.25153	-0.0161979	1.95344e-18	0.0958647	2.60738e-05	-0.0504324	0.00488525	-0.0368019	1	-0.0020484	1	-0.0018421	0.706633	-0.00965217	0.606341	-0.0106651
MPL	0.812754	-0.00559193	0.728039	0.00744594	0.748204	0.00695002	0.902495	0.00608109	0.971441	0.00499841	0.923253	0.00590985	0.768293	-0.00859497	1	0.000234367	1	0.00215724	1	-0.00199808
ELOVL1	0.376166	0.0135466	0.402307	0.0136214	0.00277929	-0.0351103	0.080861	0.0251338	0.852417	0.00775839	0.860097	0.00737804	0.282441	-0.0185538	0.873738	-0.00665759	0.480124	-0.0141257	0.0847557	0.0238726
MED8	0.391444	-0.0132313	0.363017	0.0144448	2.90795e-47	0.152932	0.74661	-0.00924632	0.351119	0.0173449	0.000114273	0.047167	0.226025	-0.0200538	1	-0.00274823	0.000499128	0.0434572	0.582448	-0.011084
CDC20	0.00199847	-0.0366912	0.722751	-0.00753577	2.10187e-20	0.0996119	0.270814	-0.018416	0.416348	0.0160072	0.320315	0.0180459	0.853447	-0.00689792	0.0501932	0.0280072	0.959396	0.00415088	0.490374	-0.0127344
ADAMTS4	3.41602e-07	0.0572209	0.0925125	0.0228841	0.00029144	0.0415618	1	-0.00221673	0.272733	0.0191312	0.257078	-0.0195673	0.00124092	0.0406348	0.20924	-0.020618	0.0578957	0.0274968	2.08121e-22	0.105943
NECTIN4	0.998489	0.00235643	0.234652	-0.0175717	0.209568	-0.0173128	0.000419113	0.0430435	0.594364	-0.0125849	0.231594	-0.0202554	0.747551	0.00901765	0.954629	0.00471922	0.99936	-0.00314292	0.845648	0.00647674
PFDN2	1	0.000653033	7.962e-08	0.0604992	2.76949e-22	0.104272	0.349483	0.0166251	0.469762	-0.014939	5.44638e-05	0.0489208	0.667309	0.0105535	0.832412	0.00753125	0.00314482	0.0381819	2.36946e-07	-0.0591469
RNF114	1	0.00181615	1	-0.00138354	0.0374293	-0.0258099	0.0680014	0.0259533	0.509679	0.0141886	0.966613	0.00477886	0.671908	-0.0104609	1	0.00185844	0.475509	-0.0142024	0.10948	0.0225905
C330007P06RIK	0.0540077	0.0247543	0.859182	-0.00504152	0.101981	0.0212356	1	-0.00189104	1	-0.00333113	0.848493	0.00764357	0.885436	-0.00615523	1	0.000528349	0.948512	-0.00444207	0.605667	-0.0106761
NEURL1A	0.758593	-0.00650606	0.0987465	-0.0225605	0.150143	-0.0192139	0.796618	0.0083133	0.622115	0.012065	0.800149	-0.00866775	0.159284	-0.02224	1	-0.000491907	0.727031	-0.00923397	0.0151425	0.031147
SRM	0.000243765	-0.0426204	0.182015	0.0191621	1.67983e-210	0.317899	4.44294e-08	-0.0625514	0.00129095	-0.0406402	1.60724e-19	0.0994038	1	0.00147075	1	0.000384255	3.32487e-09	0.067744	2.01899e-66	-0.182129
EPHA2	2.02257e-35	0.132374	2.28283e-21	-0.102637	0.0126224	0.0300378	1	-0.00315546	0.00718162	-0.035467	2.23877e-179	0.295758	1.14857e-57	0.169947	6.51123e-10	-0.0702618	3.55962e-05	0.0499858	2.96436e-19	0.0980653
RBM14	0.175487	-0.0187105	0.129894	0.0210967	0.0702192	0.0230333	0.333685	0.0169522	0.240405	-0.0199712	1	-0.000593913	0.508317	-0.013616	1	-0.000219627	1	0.00111739	1	-0.000914809
ACTN3	0.955608	-0.00315849	1.70181e-18	-0.0953202	0.669191	-0.00828066	0.000293078	0.0439705	1.10752e-08	-0.0654702	0.00668097	-0.0357768	1	-0.00305257	0.376168	-0.0164671	0.020357	-0.0318176	0.00025428	0.0437171
ZDHHC24	0.0360396	-0.0265137	0.0157211	-0.0304524	0.343884	0.0140887	0.871666	0.00672721	1	0.00159078	0.201666	0.0210946	0.0157791	-0.0325097	0.937417	-0.00515468	1	-0.00211849	0.436568	0.0137292
BBS1	0.70685	0.00739293	0.993223	-0.00247181	0.000177096	-0.0428567	1	-0.00143098	0.193475	0.0213515	1	0.00312257	0.991297	-0.00361877	0.48666	-0.0141615	0.11784	-0.0240087	0.588858	0.0109726
SLC34A3	0.995063	-0.00242287	0.671079	0.00849003	0.156032	0.019	0.203668	-0.0202062	0.310993	-0.0182206	0.866759	-0.00721352	0.499028	-0.0138142	0.85597	-0.00703306	1	-0.000180119	0.324047	0.0160627
NDOR1	0.0159793	-0.0297265	0.364233	-0.0144223	0.157427	0.0189499	1	-0.00188724	0.809321	0.00866216	0.758207	0.00953523	1	0.0024105	0.461424	0.0146539	1	0.00270056	0.941579	-0.00455898
NSMF	0.640785	-0.0085623	0.245899	0.0172651	0.192635	0.0178199	0.181294	-0.0209037	0.993803	-0.00443111	0.391885	-0.0164752	0.903413	-0.0057528	0.395785	-0.0160163	0.000847554	0.0420104	0.762322	-0.00790713
PRL7A1	1		1		1		1		1		1		1		1		1		1
PDK1	3.73983e-29	0.119936	1.46947e-33	0.129051	0.0493519	-0.024629	0.000276352	-0.0441333	1.00312e-05	-0.0525333	0.0918043	-0.0253527	0.00210968	0.0390735	0.538522	0.0131375	1	-0.000281226	0.00209886	-0.0377576
PTBP1	0.339955	-0.0143232	1	0.000218398	0.70181	0.00775194	0.872943	-0.00669765	1	-0.00368496	0.888946	0.00674831	1	-0.000424968	0.540785	-0.0130993	1	-0.00299824	0.962238	0.00411442
MVD	0.301567	-0.0151932	6.74e-12	0.0757657	0.291101	0.0152449	0.770766	0.00878177	1	0.00410734	0.853493	0.0075178	0.740775	-0.00914259	2.13197e-05	-0.0509945	1	-0.00142812	0.403571	-0.0143806
CYBA	6.85428e-29	-0.119382	1.40918e-06	-0.0549333	1.84885e-06	-0.0533336	2.88611e-26	0.114644	1	-0.00347934	2.52652e-09	0.0682286	1.81579e-19	-0.0988777	0.0133031	0.0331722	0.0202808	0.0318307	1.43709e-05	-0.0507063
ITIH3	0.0879181	0.0224292	0.0746804	-0.0239339	1	0.000841428	0.971597	-0.00443801	0.000136303	0.0465637	0.441614	-0.0155031	0.942421	-0.0048573	1	-0.00302499	0.497778	-0.013761	0.00558758	-0.0346416
TMEM110	0.861598	0.00478309	0.617376	0.00948665	0.0033704	0.0345031	0.0165231	0.0316738	0.0424147	-0.0288715	0.627108	-0.0120375	0.421862	-0.0153616	1	-0.00243428	0.674384	0.0102749	0.484459	0.012848
SFMBT1	1	-0.00140921	1	-0.00217037	0.00917874	0.0311684	0.421988	-0.0151213	0.265357	-0.0193153	1	0.000245916	0.738578	0.00918236	0.0980829	0.0248677	0.508552	0.0135378	0.756348	-0.00801295
IHH	0.653908	-0.00832118	0.920372	-0.00390379	0.657377	-0.00847387	1	0.00268006	0.898883	-0.00685673	0.617797	0.0122255	0.534597	0.0130814	0.317267	0.0178183	0.288356	-0.0184372	1	-0.00118469
PRKAG3	0.613055	0.00903929	0.252683	0.0170713	0.784371	0.00632627	0.918346	0.00572312	0.958811	-0.00538055	0.535923	0.0137635	1	0.00246687	0.867733	0.00677771	0.298055	0.0181864	0.730215	-0.00848534
CRYBA2	1.33253e-33	0.128896	8.63203e-48	-0.154081	0.109291	0.020884	1.48339e-240	0.338932	9.19452e-46	-0.151594	2.02388e-22	-0.106548	0.459068	-0.0146382	0.632685	0.0114053	0.00215744	0.0393197	2.69626e-20	0.100729
ATP7B	0.182925	-0.018465	0.718256	0.00760952	0.00603047	-0.0326151	1	0.00355283	0.793949	0.00893981	0.187126	-0.0215425	0.824464	0.00745946	0.690609	0.0102474	0.0699908	0.0266316	0.0591375	-0.0255761
SLC4A1	0.549886	0.0101511	0.966325	0.00300024	0.429612	0.0123922	0.987847	-0.00400998	0.252985	0.0196426	0.962826	-0.00487709	0.605028	-0.0117603	1	0.00121647	0.77767	0.00816294	0.707695	-0.00889193
RUNDC3A	1.3106e-29	-0.120882	0.374232	-0.0142123	0.366892	-0.0136192	0.454138	0.0144833	1	-0.000133425	0.872911	0.00709176	0.534924	0.013076	1	-0.000789392	0.187769	-0.0213123	0.355097	0.0153773
SLC4A3	3.36869e-10	-0.0693565	0.398895	0.0136882	0.0433152	-0.0251963	0.0254308	0.0300599	0.432902	0.0156464	0.286956	0.0188088	0.679812	-0.0103121	0.745382	-0.00920094	0.923494	0.00503435	0.1012	0.0229987
CDT1	0.0291751	-0.0273823	0.016158	-0.0303495	6.50978e-11	0.0715138	0.969995	0.00447928	0.375686	-0.0168234	0.620019	0.012178	0.186833	-0.0212725	0.780168	0.00852819	8.06594e-05	0.0480394	0.000188875	-0.0445007
RUNX1T1	0.00226587	-0.0363104	1.58288e-14	0.0841125	0.0010296	0.0380955	0.0577137	0.026684	0.121112	0.023966	0.675267	0.0110925	0.152431	-0.0224899	0.295236	-0.0183441	0.120789	-0.0238748	0.0759174	0.0244149
SNAI3	0.0673163	-0.0237352	0.823649	-0.00570656	0.729748	-0.00728928	1	0.00318659	1	0.00391554	1	0.00373267	1	0.00297546	0.222375	0.0202473	0.721077	-0.00936603	0.564045	0.0114029
APRT	0.0005824	-0.0402821	1.11912e-10	0.0715561	1.13219e-47	0.153602	0.00770941	0.0343665	0.445552	-0.0153984	0.0103991	0.0342557	1.2288e-08	-0.0651632	0.00723346	0.035331	1.50414e-20	0.102059	7.94275e-13	-0.0795199
GTF2H1	0.591548	0.00942488	0.388875	0.0138948	1.34291e-06	0.0539943	0.660162	-0.0108166	1	-0.00290204	0.94629	0.00529696	0.862524	-0.00672195	0.470668	-0.0144658	0.638231	-0.0110052	1	-0.00154786
HFE	0.542673	-0.0102771	0.208425	-0.018334	0.664614	-0.00835169	0.96436	-0.00463274	0.82622	-0.00830807	0.206385	-0.0209557	0.0145187	0.0328138	8.37512e-05	0.047867	0.925937	-0.00498445	0.0151425	0.0311469
SLC5A6	0.558821	0.00999969	1	-0.000455906	0.0675376	0.0232097	0.971727	-0.00442692	0.884228	-0.00713022	0.183823	0.0216395	0.296461	-0.0182004	0.110022	0.0242922	0.00367059	0.0376811	0.832059	-0.00672315
TCF23	1		1		1		1		1		1		1		1		1		1
NPHS1	0.121814	-0.0207611	1	-0.00174306	0.503896	0.0110759	0.787159	0.00847077	0.61845	0.0121347	1	-0.00211596	0.517959	0.0134173	1	-0.0016662	1	0.00023396	0.0531347	0.0260639
APLP1	0.0133118	-0.0303974	0.512755	0.0114483	5.4503e-19	-0.0959549	0.00314221	0.0372767	0.000782232	0.0420457	0.909744	-0.00622712	0.480596	0.0141916	0.926731	0.00548909	0.303171	-0.0180567	0.000184437	0.044563
QRICH1	0.303717	-0.0151451	0.47784	-0.0121317	0.0327641	0.026369	0.536701	-0.0129599	0.521321	0.0139545	1	-0.00331454	1	0.00185174	1	0.000878062	0.957834	0.00419949	0.0203332	-0.0300439
P4HTM	6.64092e-17	-0.0906232	1	-0.00169111	1.16357e-07	-0.0587927	0.0416397	0.0280763	0.462658	0.0150591	0.680432	0.0110016	0.318305	-0.0176802	0.272236	0.0189292	0.146621	0.0228171	4.91983e-06	-0.0530465
USP19	8.97921e-16	-0.0874109	0.438941	0.0128859	0.199338	-0.0176173	0.155651	0.0217544	0.011105	0.0339965	0.659443	0.0114274	0.363644	-0.0166174	0.548369	0.0129482	0.841536	0.00684976	1	-0.00269091
POLA1	0.735427	-0.00692616	1.58359e-07	-0.0592064	0.173838	0.0183988	0.247257	-0.0190142	0.445679	-0.0153899	1	0.00277132	0.855907	-0.00684326	0.878404	0.00655504	0.393479	0.0159242	0.022256	-0.0296959
CDC42	3.78379e-12	0.0761828	5.5037e-05	0.0469107	5.23338e-06	0.051124	1.49776e-05	0.0510378	0.873158	0.00734571	0.440574	0.015526	0.792196	0.00810845	0.00284108	-0.0383233	0.0288071	0.0304563	0.00260408	0.0370947
PKNOX1	0.111088	-0.0212435	7.63065e-35	-0.131518	0.0611926	0.0236705	0.00908151	0.0338329	0.928724	0.00615585	1.09544e-07	0.0617236	1	-0.00059195	0.979276	0.004132	0.382708	-0.0161686	1	0.00149262
D130043K22RIK	0.785718	-0.00604194	1	-0.00119632	0.318122	-0.0146422	1	0.00320658	0.851994	0.00776774	0.692128	0.0107553	1	0.002856	0.948793	-0.00490341	0.648575	0.0108128	0.820891	-0.00690907
GMNN	0.00255805	-0.0359391	0.0711004	0.0241659	9.45459e-109	0.231184	1	0.00260135	0.314997	-0.0181299	0.0199534	-0.0318574	2.38071e-06	0.0554101	0.601039	0.0119534	7.99051e-07	0.0579204	0.0852828	-0.0238409
ACOT13	0.482311	-0.0114038	1.59293e-07	0.0591942	0.0106004	0.0306659	0.957363	0.00476573	0.0112037	0.0339662	0.963744	-0.00485535	0.607766	-0.0117041	0.115606	-0.0240243	0.00734655	0.0354788	0.000881801	0.0403237
ZFP184	0.0324568	0.0269436	0.00166433	0.0378766	0.147259	-0.0193177	0.933932	-0.00532027	0.853728	0.00773602	1	0.00381378	0.134459	0.0231956	0.0268525	-0.0305936	0.535017	0.0130226	0.508685	-0.0124055
CYP27B1	0.669422	-0.00804182	0.947638	0.00336471	0.853296	0.00511115	0.662276	-0.0107737	0.76253	-0.00948447	0.61175	-0.0123259	0.804652	0.0078517	0.966302	-0.00443158	0.748381	0.00875264	0.897706	-0.00553717
CDK4	0.00304297	-0.0353956	0.828687	-0.005602	0.360706	0.0137366	0.850517	-0.00719113	0.715673	0.010416	0.755068	0.00960493	1	0.00141935	0.859115	0.00696582	0.959124	-0.00415618	0.744859	-0.00822019
B4GALNT1	1.2764e-37	-0.136461	6.34568e-07	-0.0565243	0.199417	0.0176142	0.374266	0.01609	0.642064	-0.01172	0.606556	0.0124269	0.0048733	-0.0364656	0.358941	-0.0168428	0.971434	-0.00383372	0.282803	0.0170094
METTL1	0.416346	-0.0127201	0.22777	0.0177696	1.10691e-47	0.153619	5.10642e-06	-0.0533621	0.0836061	-0.0258414	0.0962406	0.0251173	0.109431	0.0242766	0.717798	-0.00972715	0.0346526	0.0297209	3.67245e-08	-0.0626038
TSPAN31	3.783e-10	-0.0691725	9.91484e-11	0.0717447	0.00281804	-0.0350669	8.61873e-06	0.0522426	0.0125637	0.0335606	0.915538	0.00611752	0.910558	-0.00558154	0.597334	-0.012033	0.676893	-0.0102056	0.0160613	0.0309243
KIF5B	0.957452	0.00311675	0.734461	0.00733515	1.75168e-12	0.076875	1	-0.00247288	0.0564895	0.027655	0.150621	0.0227813	1	-0.000708114	0.0295897	0.0302018	0.391487	0.0159692	1	0.00135997
SAAL1	5.13101e-08	0.0607905	0.00167765	0.0378536	5.66377e-05	0.0456889	1	-0.0029521	0.794772	-0.00892196	0.369713	0.0169332	0.202168	0.0207548	1	0.00312198	0.00209712	0.0394036	0.0152261	-0.0311262
TPH2	0.0225585	0.0283905	0.819922	0.00577583	1	-0.00220492	0.00473574	-0.0359719	0.0424903	-0.0288598	0.39623	-0.0163793	0.24072	-0.0196345	0.685548	0.0103606	0.968255	-0.00390341	0.900554	-0.00548277
KRT23	0.678322	0.00788061	0.830217	-0.00557179	0.920308	0.00387246	1	-0.000152847	0.833375	0.00812863	0.848493	-0.0076465	0.614485	0.011565	1	0.000118164	0.725339	0.00927631	9.12533e-05	0.0463402
CNP	1.79041e-05	0.048962	1.16719e-18	-0.0957505	4.00883e-09	-0.0648186	0.0242975	-0.0302303	0.0589202	0.0274573	0.857174	0.00744361	0.454252	-0.0147295	0.000143178	0.0465414	0.0019315	-0.0396469	1.04155e-05	-0.0514224
TTC25	0.213895	-0.0174812	0.257461	0.0169451	0.00477808	-0.0333792	1	0.000320989	0.471777	0.0148931	1	-0.0029487	0.359911	0.0166936	0.441249	-0.0150409	0.197671	-0.0209856	0.100609	0.0230268
SULF2	2.11171e-112	-0.234891	0.0737281	-0.0239979	0.0600189	-0.0237568	0.936861	0.0052383	0.0840193	0.0258205	4.9214e-10	-0.0708542	4.22894e-11	0.0742471	7.42198e-07	-0.057923	0.257851	0.0192271	1.48503e-07	0.0600258
SOD2	1.69261e-07	0.0585619	0.00286554	0.0362112	3.64646e-18	0.0937554	0.863674	-0.00691989	0.165284	-0.0222643	0.0441428	0.028715	0.466693	0.0144833	0.870969	0.00671865	2.40906e-05	0.0508568	1.09041e-16	-0.0910953
TMCO6	0.21588	0.0174186	0.88122	0.00464569	0.363048	-0.0136928	0.257656	0.0187472	0.132263	0.0234863	0.343765	-0.0174918	1	0.00159853	0.741954	-0.00926617	0.998286	0.00316944	0.0688421	0.024876
STAMBP	0.098549	0.0218607	0.538963	0.0109322	0.117873	-0.0205017	0.728412	0.00956417	0.401303	0.0163064	0.204137	0.0210224	0.587388	-0.0121086	0.258102	-0.0192796	0.715866	-0.00945832	5.60197e-05	0.0475397
EZH1	0.0579931	0.0244269	0.755715	0.00692796	3.74113e-24	-0.108712	0.235865	0.0192946	0.669473	0.0112477	0.380144	-0.0167295	0.0815575	-0.0257294	8.46446e-11	0.0734343	0.367501	-0.0165178	0.000300713	-0.0432785
HAP1	1	0.00172893	3.80269e-09	0.0658644	0.052693	-0.0243375	0.0042922	-0.0362916	0.50455	-0.0142944	0.129037	-0.0236186	0.359685	0.0166977	0.807675	-0.00798778	0.457092	0.0145571	0.510014	-0.012378
P3H4	0.0464494	-0.0254138	0.243359	0.0173327	0.13235	-0.0198851	0.963101	0.00465765	0.984254	-0.00468836	0.960941	0.00494108	0.543864	0.0129125	0.0111359	-0.0338153	0.656774	0.0106484	0.169834	0.0201839
CTNNB1	0.0192107	-0.0290203	2.3539e-07	-0.0584504	6.84608e-10	-0.0677806	0.000574783	-0.0421846	0.382404	-0.0166839	0.027916	-0.0305745	0.426141	0.0152621	0.966762	0.00441269	2.09227e-08	-0.064642	2.91845e-05	0.0490785
EIF1B	0.0131023	0.0304539	1.82332e-28	0.118749	1	-0.000630348	0.11033	-0.0236036	0.543693	-0.0135321	0.00739338	-0.0354267	1.30006e-08	0.0650612	1	0.00119881	0.0514031	0.028017	6.80374e-27	-0.116156
KLK4	0.228553	-0.0170561	0.862462	0.00497569	0.406158	0.012845	0.823652	0.00780518	0.895337	0.00693274	0.739544	0.00989123	0.459068	-0.0146378	1	0.0013043	0.823466	-0.00724675	0.723096	0.00861
CHRD	0.20557	-0.0177345	0.350723	0.0147277	5.33007e-08	-0.0602374	0.0901013	0.0246383	0.735923	0.0100666	0.940641	-0.00544532	0.746258	0.00904639	1	-0.00184471	0.184993	-0.0214013	0.356293	0.01535
PSMD2	0.491491	0.0112204	0.0273996	0.0283081	0.0699997	0.0230471	0.0135916	0.0324121	1	0.0032916	1	-0.00268178	0.962877	0.00436687	0.115512	-0.0240285	0.051834	0.0279832	0.859089	0.00623347
SYNGR3	4.16913e-19	-0.0965577	0.327052	-0.0152563	1	-0.0017165	0.823067	-0.00781519	0.978498	0.00483782	0.715453	0.0103381	0.00171927	-0.0396765	0.221883	0.0202599	0.00044413	0.0437657	1	-0.00309735
VARS	0.891052	0.00427929	0.747445	0.00709075	7.42363e-47	0.15227	0.021123	-0.0307614	0.706084	-0.0105931	0.883511	-0.00689622	0.840531	0.00712781	0.554829	0.012817	0.00013398	0.0468104	1.20949e-14	-0.085168
VWA7	0.365246	-0.0137764	0.724529	-0.00750092	0.540529	0.0104216	1	-0.00149029	1	-0.00244895	0.546921	0.0135601	0.35744	-0.0167503	1	-0.000188306	1	0.001269	0.736885	0.00836985
HSPA1L	0.977416	-0.00274949	0.169542	-0.0195951	0.717467	0.00749536	1	0.00324824	0.954626	-0.00548526	1	-0.00150588	0.853715	-0.00689123	0.859065	-0.00696951	0.951582	0.00436124	0.981057	-0.00364555
SLC44A4	0.155494	-0.0194147	0.925459	0.00381154	1	0.00140947	0.981599	0.00418717	0.865058	0.00752568	0.838515	-0.00785743	0.0869951	0.0254152	0.0845499	0.0256167	0.990159	0.00337502	0.074355	0.024504
MSH5	1	-0.00165808	0.0851681	0.023295	0.509528	0.0109742	0.630251	-0.011347	0.32182	0.0179668	0.325716	-0.0179082	0.638997	0.0110927	0.178686	-0.0215795	0.56581	0.0124194	0.832059	-0.00672203
ABHD16A	3.18421e-05	0.0476388	1	0.00056291	0.105791	-0.0210517	0.00966423	0.0336175	0.272489	0.0191398	1	0.0019222	1	5.14534e-05	0.590309	0.0121721	1	-0.00222674	0.0510008	0.0262312
NEU1	1.86284e-08	-0.0626097	0.000362259	0.0421588	0.837606	-0.00539814	0.725427	-0.00962376	0.925604	0.00624991	0.831469	-0.00800572	1	-0.00314982	0.865366	0.00684004	1	-0.00178894	0.790246	-0.00742101
DDAH2	1.23314e-30	-0.122988	0.0563229	0.0252487	1.97338e-27	-0.116063	6.38847e-44	0.148262	2.71198e-24	0.110566	3.8925e-13	0.0813136	1.15367e-16	-0.0913894	0.0752444	0.0261936	0.0342558	0.0297676	6.3245e-17	0.0917655
CLIC1	5.60106e-80	-0.198783	2.78437e-10	-0.0701261	8.30991e-07	-0.0549658	7.91702e-49	0.156297	4.82834e-06	0.0540704	0.956565	0.00503363	3.94198e-07	0.0589043	0.00120903	-0.0409065	0.947302	-0.00448005	0.000655372	0.0411599
LSM2	2.45949e-05	-0.0482354	4.94649e-06	0.052324	3.05542e-191	0.303689	0.0506605	-0.0272434	1	-0.00012817	0.000290234	0.0448239	0.152409	-0.0224936	0.000513527	0.0432684	1.67068e-12	0.0793574	1.93895e-23	-0.108386
POLE	0.108042	0.0213881	0.435951	-0.012943	3.00883e-08	0.0612734	0.323322	-0.0171802	0.031305	-0.0301198	0.820992	-0.00822569	1	0.000468785	0.99701	-0.00363273	0.262434	0.0190972	0.084839	-0.023868
ATP1A2	0.0681253	0.0236808	2.93701e-05	0.0483891	4.82815e-06	-0.0512956	0.889324	-0.0063743	1	-0.00116452	0.244934	-0.0198817	0.704773	0.0098472	2.78514e-09	-0.0678994	0.234606	0.0198789	1	0.000321716
CASQ1	0.156359	-0.0193829	1	-0.00228251	0.47692	-0.0115402	1	-0.00185271	1	0.00368572	0.994973	-0.0039818	1	0.000986379	0.444087	-0.0149925	0.601249	-0.0117341	0.485526	0.012824
STX1A	0.474571	-0.0115576	0.567257	0.0103992	0.0688036	0.0231278	0.414801	0.0152727	1	-0.00241786	0.346212	0.0174426	0.00385725	-0.0372208	0.103858	0.0245802	0.417407	-0.0154104	1	0.00138336
CEACAM9	0.779681	0.00614734	0.179157	-0.0192641	0.78843	0.00626526	1	-0.00241051	0.0235826	0.0312515	0.851805	-0.00757273	0.699626	-0.00995005	0.926731	-0.00548644	1	-0.000550675	0.670903	-0.00956924
ZFP775	0.132324	-0.0203194	0.103824	0.0222976	0.0670806	0.02324	0.750642	0.00917681	0.669675	0.0112438	1	0.00139325	0.411355	-0.0155853	0.383336	-0.0162969	0.426351	0.0152201	0.996334	-0.00329198
SCUBE2	7.45292e-110	-0.232284	1.54189e-28	-0.118903	2.33482e-39	0.139473	1.86415e-07	-0.0599218	0.00628107	-0.035905	0.00774164	0.0352708	3.94643e-77	-0.196094	4.40788e-17	-0.0927989	2.106e-111	0.235147	5.92333e-45	-0.150139
MRPL49	0.163987	-0.0191064	2.56869e-08	0.0625461	3.26612e-16	0.0883206	0.0993134	0.0241315	0.823408	0.00835648	0.121749	0.0239332	0.679989	-0.0103089	0.924384	0.0055517	0.0162248	0.0326507	0.412884	-0.014197
DENND2C	1	-0.00223662	0.324037	-0.0153272	0.495878	-0.0112128	1	-0.00319693	0.968122	0.00510727	0.344766	0.0174738	0.486044	0.014073	0.866089	-0.00681882	0.309619	-0.0178924	0.523498	-0.0121349
MARK3	0.000188459	-0.043283	0.612287	0.00957759	1.7307e-07	0.0580432	0.101088	0.0240442	0.0272395	0.0306772	1	0.00295522	0.00241471	-0.0386714	0.884589	-0.00644294	0.209648	0.0206251	0.00329587	-0.0363499
GATAD1	0.0503505	-0.0250645	0.0183592	0.029872	0.900109	-0.00426491	0.00269913	0.0377513	0.0691618	0.0267279	0.122994	0.0238816	4.01976e-05	-0.0493569	0.0763661	0.026121	0.378855	0.0162559	0.478887	-0.0129542
M6PR	0.107689	-0.0214045	0.768985	-0.00668817	0.00527311	0.0330594	0.961862	-0.00467503	1	0.00379945	1	3.5064e-05	0.884047	-0.00620165	0.927217	-0.00545766	1	0.000160661	0.203211	-0.0191106
LRRC8A	0.0497658	-0.0251153	0.0100997	0.0320451	0.313335	0.0147416	0.755655	0.00907653	0.0140947	0.0331482	0.440008	-0.0155365	0.297363	0.0181775	0.786633	-0.00841599	0.448475	0.0147481	0.814122	-0.00701846
MC5R	0.715267	-0.0072466	1	3.29406e-05	0.950421	0.0032655	1	-0.00322492	1	-0.00307578	0.824547	-0.00814772	0.59171	0.0120284	0.537246	-0.0131683	0.626045	-0.0112378	0.976336	0.00376487
PPP2R1A	0.368483	-0.0137075	0.633148	0.0091874	0.684523	0.00802899	0.856129	0.00708414	1	0.00141169	0.830839	0.00801641	0.735989	-0.00924579	0.932038	-0.00530706	0.756735	0.00857088	0.403442	0.0143862
FANCE	0.00552552	0.0334639	0.00547406	-0.0341242	3.66671e-09	0.064973	0.929712	0.00545988	0.0065416	0.0357704	0.73224	-0.0100394	0.374756	-0.0163791	1	-0.00232156	0.0235113	0.0312467	0.304696	-0.0164964
TINF2	0.0226308	-0.0283762	0.0544055	0.025406	4.01613e-05	0.0465124	1	-0.00261204	1	-0.00331625	0.952362	0.00516653	0.988821	-0.00368581	1	0.00246652	1	-0.000809179	0.900283	0.0054897
TSSK4	0.525296	-0.0106104	0.405397	0.0135636	0.49816	0.0111734	0.886775	-0.00642054	1	0.00318564	1	-0.00240661	0.78396	-0.0082712	1	-0.00169576	0.354626	-0.0168152	0.909417	0.00529754
HAPLN4	1	-0.00231307	0.176843	0.0193393	1	-0.00111672	0.758584	-0.00901277	1	0.00279243	0.918204	-0.00603346	1	-0.00187859	0.0482233	-0.028186	0.832783	0.00705678	0.641013	-0.0100671
DUS3L	0.0481662	-0.0252622	0.998985	-0.00234659	0.0306471	0.0266389	0.607645	0.0117392	1	0.00177639	0.520065	0.0140722	0.863986	0.00668828	0.644541	-0.0111599	0.740265	0.00892518	0.620006	-0.0104295
GTPBP3	0.00156598	-0.0374257	0.000570285	0.040926	0.000262642	0.0418354	0.147095	-0.0220928	1	-0.00297359	0.878153	0.00699345	0.696992	-0.0100013	0.945426	-0.00496566	0.288695	0.0184258	0.950071	-0.00440928
TGFBR1	0.00394849	0.0345594	0.308957	-0.0156717	0.000797655	-0.0388192	0.094005	-0.0244276	0.838868	0.00801146	0.0462749	-0.028509	0.0683107	-0.0265689	0.010437	0.0340509	0.31284	-0.0178094	0.0224261	-0.0296652
HOMER1	0.24699	0.016547	1	0.00130792	0.00133842	0.0373306	0.928558	0.00549564	0.940151	0.00588419	0.673155	-0.011141	0.479332	0.0142157	1	-0.00248139	0.0106465	0.0341952	0.993071	-0.0033522
RAD51C	0.634837	-0.00866031	0.000147662	-0.0444877	0.0217127	0.0280049	0.0118516	-0.0328942	0.182229	-0.021699	0.848689	-0.00763837	0.967397	-0.00427204	0.325417	0.0176254	0.984898	-0.00351744	6.36096e-05	0.0472295
GABRB2	0.391859	-0.0132228	0.247307	0.0172205	0.878981	-0.00464587	0.387654	0.0158163	0.0143158	0.0330931	0.603609	0.0124728	0.467438	-0.0144676	0.728276	0.00953352	0.240359	0.0197169	1	-0.000818166
CAV1	0.0647469	0.0239095	0.794979	-0.00622	0.761599	-0.00670349	0.868244	-0.00680178	1	0.00372381	0.804012	-0.00856546	0.463082	-0.0145547	0.314006	-0.0179054	1	0.00242719	0.000106187	0.0459683
ARPP19	0.893647	0.00423523	0.172915	0.0194793	2.19086e-15	0.0859277	0.68736	0.0103174	0.928772	0.00615229	0.0684409	0.0267705	0.495576	-0.0138902	1	-0.00190392	0.0147618	0.0330096	0.507385	0.0124302
BCL2L1	7.28185e-09	0.0642591	0.0847948	0.0233227	3.50369e-05	-0.0468322	0.201639	0.0202727	1	-0.00135403	0.0135223	0.0333292	1	-0.00122434	0.107558	0.0244052	0.83962	-0.00689522	0.0639769	0.0252152
KHSRP	0.441425	-0.0122137	0.518854	-0.0113302	9.48892e-07	0.0546985	0.00324126	-0.0371774	0.418182	0.015966	0.545971	-0.0135864	0.962877	0.00436761	1	-0.00277893	1	0.00238206	0.379927	-0.0148604
DIO2	0.0852999	-0.0225751	0.996226	0.0024106	1	-0.00145607	0.932471	0.00537397	0.979455	0.00481638	1	0.00312267	0.9451	-0.00478487	0.971231	-0.00430079	0.786266	0.00798756	1	-0.000724013
CCDC124	2.11196e-05	0.0485876	4.9444e-07	0.0570213	4.95399e-39	0.138886	0.920331	-0.00566863	0.273662	-0.0191099	0.00265138	0.0386826	0.710208	0.00973616	0.760043	0.00891935	2.79943e-06	0.055424	0.398048	0.0144834
CCT4	0.0189526	-0.0290745	0.676811	-0.00838225	6.54237e-08	0.059863	0.909801	-0.00594762	0.508699	-0.0142153	0.0717343	0.0265543	0.201478	0.0207778	0.0354671	-0.0294837	0.00807186	0.03515	0.000286175	-0.0434072
0610009B22RIK	0.0190322	-0.029057	1	0.00024408	3.29258e-05	-0.0469817	0.734392	-0.00945842	0.827442	0.00826189	0.101131	0.0248699	0.702347	-0.00989471	0.562477	-0.0126866	0.61976	0.0113586	0.416724	0.0141248
CPT1C	4.58511e-12	-0.0759002	0.409688	-0.013471	1.77274e-11	-0.0734874	0.539182	-0.0129039	0.597399	0.0125292	0.0731339	-0.0264683	1	0.00216446	0.636617	0.0113204	0.884437	0.00591475	0.923686	0.00496594
TWIST2	0.758025	0.00651744	0.646118	-0.00893917	0.268952	-0.0157714	0.461733	-0.0143253	0.488917	0.0145812	1	0.00328644	1	0.00149309	1	-0.000331991	1	-0.0011158	0.916003	-0.00516016
ZFP655	0.0731058	0.0233411	1	0.000617769	0.383137	0.0132998	1	-0.00336563	0.792041	-0.00897691	0.259088	0.0195104	0.787315	-0.0082041	0.306839	-0.0180873	0.995681	-0.00324596	0.796381	-0.00732148
RHOA	0.626748	0.00880534	0.764223	0.00677373	0.00156661	0.0368648	0.00268732	0.0377664	0.127655	0.0236869	0.383089	0.0166605	0.599878	-0.0118586	0.415483	-0.0156114	0.957202	-0.00422229	0.677505	0.00944997
ZMIZ1	6.99051e-14	0.0817509	1.02855e-06	0.05557	3.74676e-05	0.0466759	0.0412802	-0.0281149	0.000953194	0.0414941	0.979393	0.00438246	1.70665e-05	-0.0512642	1	0.00201	0.72251	-0.00933273	0.088997	-0.0236335
ANKRD26	0.451968	-0.0120013	0.499797	-0.0116995	0.0384224	-0.025702	0.000262539	-0.0442699	0.509085	-0.0142037	1	-0.00376288	1	-0.00164399	0.306795	0.0180897	0.316628	-0.0176963	0.0380561	0.0274983
ALDH16A1	0.250948	0.0164404	0.0465988	-0.026086	0.340343	-0.0141635	0.735047	-0.00944797	0.251337	-0.0196816	0.971464	-0.00460653	1	0.00287654	0.988843	-0.00386566	0.242552	0.0196468	0.00875853	0.0331344
HNRNPA0	3.42383e-07	0.057216	5.24864e-05	0.0470233	0.358093	0.0137924	1	-0.0018755	0.359065	0.0171556	0.851939	0.0075656	0.530799	-0.0131589	0.666194	0.0107592	0.00227705	0.0391607	0.000868345	-0.0403648
PRRG2	0.00739114	-0.0324893	0.656828	-0.00874498	0.794843	0.00614942	0.53359	0.0130106	0.754626	0.00965758	1	-0.00277073	0.977737	0.00400042	1	0.000123304	1	-0.000286396	0.0857791	0.023815
HNRNPH1	0.850787	-0.00496264	1	0.00148577	0.969151	-0.00289592	0.695462	-0.0101752	1	0.000265784	1	0.00301703	0.380577	-0.0162533	0.710132	0.009872	0.185953	-0.0213663	0.387584	0.014688
IFT43	1.60609e-23	-0.107474	1.40389e-06	-0.0549414	4.07099e-08	-0.0607279	1.3448e-05	0.0512768	0.012703	0.0335171	0.00241354	0.0389554	0.00679129	-0.0354017	0.997984	-0.00360114	0.753841	0.00862656	0.0458378	0.0267064
ID3	1.51143e-44	-0.148554	2.34211e-52	0.161262	1.02715e-06	0.0545401	3.08891e-31	0.12507	0.00150435	0.0402056	1.33491e-44	0.150132	0.649785	0.0108959	4.21525e-09	0.0672232	0.00233838	0.0390788	7.49548e-111	0.233957
TCAP	0.634792	0.00866139	0.685141	0.00823062	0.272575	0.015682	1	0.00062479	0.241203	0.0199401	0.750287	-0.00968359	0.694266	0.0100481	1	-0.00339582	0.734839	0.00905753	0.175712	0.0199848
ARID1A	7.47155e-05	0.045607	0.000112773	-0.0451562	0.00426259	-0.0337511	0.068035	-0.0259485	0.670146	0.0112338	0.0403039	-0.0290872	0.644271	0.0109877	0.839193	0.00738441	0.585343	-0.0120173	0.566894	0.0113453
CRLF1	0.00506516	-0.0337555	0.43508	0.0129597	0.0364267	0.0259272	0.966045	0.00457774	0.930737	0.00610161	0.956564	0.0050666	0.484689	0.0141041	0.684939	0.0103789	0.0426998	-0.0288224	0.191638	0.0194643
CTSD	1.48051e-07	-0.0588163	0.549985	-0.0107036	1.36212e-10	-0.0703638	0.0367051	0.0286096	0.737844	0.0100244	0.521761	0.0140318	0.00377116	-0.0372957	0.95185	-0.00479002	0.216992	0.0204216	0.425664	0.0139393
RPLP1	0.0627043	-0.0240577	0.203926	0.0184702	1.9159e-38	0.137822	0.380525	0.0159581	0.0107205	-0.0341206	0.587234	0.012791	0.0699947	0.0264486	0.0243903	-0.0309661	0.614343	0.0114655	0.372862	-0.0150011
HMGCLL1	1.77017e-38	-0.138017	0.683612	-0.00826365	0.0023629	-0.0356213	0.319835	0.0172563	0.707698	0.0105618	0.577019	0.0129954	0.620205	-0.0114712	0.406815	-0.0157773	0.663207	0.0105191	0.0477212	0.0265197
TTC9B	4.18027e-11	-0.0726107	1	-0.00222276	0.714906	-0.00754178	0.971597	-0.00444267	0.980129	-0.00479376	0.925565	-0.00583278	0.598779	-0.0118808	0.0383826	0.0291639	0.000853549	0.0419851	0.452184	-0.0134533
PHOX2A	1.3854e-38	0.138213	4.31987e-45	0.149673	1	-0.000581899	1.5449e-07	-0.0602689	1.42054e-07	-0.0609536	1.26968e-06	-0.0570228	0.000306203	0.0444242	0.000116231	-0.0470554	7.65535e-06	0.0533514	0.748022	-0.00816348
ABHD8	1	0.0020017	4.39287e-14	0.0827602	0.235941	-0.0165903	1	-0.000666293	0.831275	0.00817205	0.0709413	-0.0266134	0.154985	0.0223964	0.011667	-0.0336582	5.03855e-07	0.0588135	0.607141	-0.0106539
IFT22	0.138115	-0.0200706	0.975427	0.00280566	0.469093	0.0116741	0.472157	0.0141446	1	0.00174716	1	-0.00163878	0.518482	-0.0133988	1.37563e-05	-0.0519634	0.971732	-0.00381316	1.84374e-05	0.0501339
FZD3	9.62717e-22	0.103223	9.05519e-30	0.121467	6.53441e-05	-0.0453329	0.041087	0.0281368	0.145256	0.0229864	0.291808	-0.0186887	0.339914	0.0171544	1	-0.00233682	0.270095	-0.0189052	0.246992	-0.0179256
1700008O03RIK	0.0338949	-0.0267645	0.942995	-0.0034672	7.46444e-05	-0.045012	0.961637	0.00467918	0.809146	0.00866603	0.777335	-0.00911688	0.892311	-0.00601661	0.448302	-0.0149114	1	0.00233811	1	-0.00216882
MID1IP1	6.24267e-35	-0.13145	8.78656e-10	-0.0682812	1	0.000901787	0.0484572	0.0274307	0.845494	0.00789065	0.0044956	0.0370578	1.01745e-09	0.0693058	0.0439945	0.0285736	5.75981e-14	-0.0839271	0.107978	-0.02266
AP2S1	0.0689543	0.02362	6.15946e-08	0.0609644	0.45668	0.0118993	0.0797286	0.0252034	0.264248	0.0193393	1	-0.00109572	0.48651	-0.0140664	1	-0.000274708	0.888065	-0.00582619	6.85963e-08	0.0614647
FGFRL1	1.18256e-70	-0.186962	0.922383	-0.00386466	1.91408e-41	-0.143159	0.598944	-0.0118823	1.441e-05	-0.0517318	0.864591	0.0072747	5.1281e-14	0.0836427	1	0.00311517	1	0.0007986	7.41379e-22	-0.104622
4930432K21RIK	0.480837	-0.0114371	1	0.0013473	0.387462	-0.0132198	0.928558	-0.00549785	0.364355	0.0170469	1	0.0029557	0.244906	0.0195241	0.91643	0.00574081	0.95299	0.00432304	0.316526	0.0162298
FHL2	0.446657	-0.0121018	5.56759e-10	-0.0690178	0.983235	0.00259298	2.36299e-06	0.0549466	0.0911061	-0.0254202	0.000403525	-0.0439772	0.678627	0.0103408	0.000911028	-0.0417192	0.00204484	-0.0394741	5.32022e-15	0.0862287
EMC10	0.732987	0.0069663	0.888785	0.00449913	7.53358e-06	-0.0503365	0.309209	0.0174976	0.221112	0.02053	0.720105	0.0102659	0.0605615	-0.0271015	0.000273954	0.0449059	0.660846	-0.0105675	0.174123	-0.0200375
CLSTN3	2.97418e-08	-0.0617736	0.980426	-0.00271263	0.0222256	0.0279129	0.793576	-0.00836181	0.971299	-0.0050112	0.736639	-0.00995096	0.544821	0.0128856	1	-0.00270253	0.168964	-0.0219668	0.646194	0.0099811
FBXW9	0.778765	0.00616576	2.92277e-05	0.0484012	0.000694366	-0.0392095	0.094926	0.0243687	0.903056	-0.00676751	0.799491	-0.00867856	0.884582	-0.0061827	0.00122088	-0.0408758	0.558799	-0.0125662	0.00247658	0.0372481
SPIB	0.56441	0.00990183	0.903286	0.00422017	1	-0.000629301	1	-0.00012613	0.58748	0.0126935	0.69873	0.0106397	0.642041	0.011036	0.906899	0.0059417	0.699287	-0.00979934	0.652509	-0.00987245
FNBP4	0.105857	0.0214956	0.00112712	0.0390075	0.000741589	0.0390272	0.273848	-0.0183434	0.902477	-0.00677952	0.876549	-0.00703164	0.494997	-0.0139043	0.776003	0.00861949	0.359136	0.0167164	1.06883e-06	-0.0562276
CERS4	3.2463e-169	-0.286365	9.07827e-08	-0.0602544	1.15891e-56	-0.167498	1.06458e-17	0.0938967	7.88177e-10	0.0698006	5.62622e-19	0.0979973	8.52064e-26	-0.113863	5.44809e-12	0.0774755	7.72671e-23	0.107634	0.224787	0.0185081
SCRN3	0.79446	0.00588849	0.0735121	0.0240127	0.565524	-0.0100064	0.727453	-0.00958167	1	0.00061462	0.907821	0.0062873	0.429369	0.0152042	0.280153	-0.0187322	1	0.00238256	0.971474	0.00386085
PHAX	1.88929e-06	-0.0537939	0.682127	0.00828662	2.80711e-05	0.0473549	1	0.00197934	0.440779	-0.0154899	0.460726	0.0151634	0.720771	0.00953915	0.769992	-0.00873865	0.0248539	0.0310294	0.000918978	-0.0402062
TLE1	2.34666e-111	-0.233824	0.926224	-0.00379905	1.64945e-15	0.0862909	3.24224e-06	0.0543024	0.233763	0.0201684	1	-0.0024477	0.0053392	0.0361647	1.89177e-18	-0.0965044	2.17274e-09	-0.068452	3.20349e-06	0.0539567
1700109H08RIK	0.631156	0.00872487	0.860766	0.0050069	0.41365	-0.0126971	0.511689	-0.0134018	0.746612	-0.00982952	0.795446	-0.00876922	0.7887	0.00817174	1	-0.00197888	0.942075	-0.0045934	0.575877	0.0111866
RELT	0.476781	-0.0115167	1	0.00128157	0.00450438	0.0335704	0.0122867	-0.0327666	0.254139	-0.0196053	1	0.00109939	0.853815	-0.00688839	1	0.00330331	0.384839	-0.0161188	0.169921	0.0201801
SNRPB2	0.925375	-0.00369374	7.21767e-05	0.0462568	1.52132e-05	0.0487611	2.97418e-05	0.0495107	0.927548	0.00620223	0.649549	0.0116253	0.351766	-0.0168764	0.221432	-0.020275	0.471176	0.014294	0.0534258	0.026038
UBC	0.617876	-0.00895199	6.8845e-12	0.0757327	9.61665e-05	-0.0443941	0.0185589	0.031235	0.329791	0.0177899	0.738485	-0.00991882	0.0832316	0.0256347	0.144296	-0.0228072	0.818317	-0.00735993	0.370597	0.0150501
PRPF31	0.050009	-0.0250949	0.507659	0.0115428	6.84469e-26	0.112675	0.369397	0.0161932	1	-0.00379075	0.113671	0.0243109	0.405479	-0.0157131	1	0.000436523	0.101693	0.0247856	0.101029	-0.023007
SERTAD1	0.358795	0.0139194	0.0160727	-0.0303711	1.46899e-12	-0.0771274	1.63121e-09	0.0681864	2.06546e-09	0.0682481	0.0105027	0.0342197	1.0234e-05	-0.0523834	0.96757	0.0043914	0.0898627	-0.0254276	8.36049e-34	0.130265
CARHSP1	6.16537e-50	-0.157299	4.4227e-08	0.0615753	0.0667304	-0.0232637	3.35936e-08	0.0630395	9.432e-07	0.0573853	4.06425e-05	0.049609	2.56108e-15	-0.0875332	0.000134988	0.0466805	0.296349	0.0182291	1.51377e-06	0.0555219
ELK3	0.115449	-0.0210461	0.000825502	0.0399009	7.92665e-05	-0.0448673	0.147954	0.0220575	0.319608	0.0180143	0.320425	-0.0180404	0.794053	0.00807628	0.0168112	-0.0323472	0.303495	-0.0180498	1	0.00163947
HERPUD2	0.610403	0.00908094	0.418398	-0.0132965	0.47749	0.0115292	0.945666	-0.00506329	1	0.00253813	0.942464	0.00540265	1	-0.00123207	0.745324	-0.00920977	0.635299	-0.0110467	0.937796	0.00465438
RDH13	0.204246	-0.0177771	0.944313	0.00342933	0.985003	-0.00254803	1	-0.00140779	1	-0.00119005	1	0.00263126	0.630715	0.0112369	1	-0.000556463	0.654035	-0.0107046	0.368509	-0.0150935
ADAM21	1	0.000877859	0.750837	0.00701879	0.213623	-0.0172002	0.302703	0.017651	1	0.0017396	0.657061	0.011459	0.67887	-0.0103343	0.0769352	-0.026081	0.92812	-0.00494457	0.0365928	0.0276609
NUTF2	0.0411899	-0.0259355	0.0349333	0.0273057	1.16193e-09	0.0669088	0.978031	0.00426778	1	-0.00313975	0.899703	0.00647017	0.149248	-0.0226172	0.667972	-0.0107316	0.0790711	0.0260272	0.0117049	-0.0320988
FUT1	1	9.10393e-05	0.600691	0.00980038	0.865967	0.00489455	0.909065	0.00596709	0.976939	0.00486616	1	0.00342426	1	-0.00021952	0.981595	0.00405347	0.750756	-0.00868656	1	0.00251713
ARPC5	0.211177	-0.0175708	2.46275e-07	-0.0583624	4.4931e-12	0.0755145	0.0260558	0.02997	1	8.70396e-05	0.166921	0.022196	0.00149065	-0.0401045	0.563145	0.0126715	1	-0.00218091	8.40655e-25	0.111526
RNF151	0.00641499	-0.0329676	0.779506	-0.00649583	0.00082896	0.0387095	1	0.000711029	0.322	0.0179615	0.430502	0.0157223	1	0.00131336	0.690609	-0.0102506	0.753329	0.00864244	0.75619	-0.00801519
ELAVL2	0.890865	-0.00428329	1.87976e-38	0.138199	0.00122814	-0.037585	2.43284e-09	0.0675241	0.554497	-0.0133181	0.0493664	0.0282333	0.0176875	0.0320896	3.48998e-08	0.0636042	7.85405e-60	0.173526	9.66865e-24	-0.109096
POU2F2	9.35945e-29	-0.119099	0.322697	-0.0153591	8.02999e-05	0.0448345	0.343935	-0.016732	0.0363667	-0.0295008	0.00202408	-0.0394807	0.00999848	0.034127	1.27528e-07	-0.061268	0.496062	-0.0137977	0.352229	-0.0154432
MGST1	3.38588e-28	-0.11792	1	-0.00120817	0.617127	0.0091278	0.277539	0.0182446	0.664037	0.0113406	3.57787e-09	-0.0676558	3.96214e-05	0.0493925	7.04401e-06	-0.053404	1	-0.00196735	0.70756	-0.00889648
NFIB	0.268327	-0.0159981	0.72701	0.00746332	0.64737	-0.00863021	1	-0.000411202	0.412793	0.0160788	1	0.00159497	0.115001	-0.0240326	0.00124612	-0.0408105	1	-0.00149141	1	-0.000347764
HTR3B	0.648788	0.00841127	1	0.00190556	1	-0.000206144	0.761703	-0.00895368	0.809321	-0.00866288	0.956565	-0.00503959	0.985629	-0.00377507	1	0.00182313	1	0.000762784	1	-0.00109345
RAB25	5.68115e-05	-0.0462687	0.000171268	-0.0441033	0.398645	0.0130006	0.799905	-0.00824795	1	-0.00371707	0.1926	-0.0213744	0.013783	0.0329958	0.0895844	-0.0253355	2.6166e-08	-0.0642551	0.0163834	0.0308465
UBQLN4	0.150152	-0.0196181	0.973512	-0.00284241	0.00572775	0.0327846	1	-0.00272039	0.580622	-0.0128294	0.633587	-0.0119358	0.531851	-0.0131349	0.984114	-0.00398191	0.0679851	0.0267658	0.100299	-0.0230461
RBFOX1	1.64897e-34	0.130643	6.84658e-14	-0.0821689	0.0553638	-0.0241228	6.14866e-12	-0.0767679	0.00164044	0.0399537	3.02501e-08	-0.0640524	0.400935	0.0158079	1	-0.00313562	1.60334e-05	0.0517535	1.8322e-70	0.187515
RPS18	6.00011e-22	0.103722	1.35763e-06	-0.0550116	1.46719e-19	-0.0974423	0.861624	-0.00697535	6.45219e-07	-0.0581118	0.00339575	-0.0379193	6.58703e-08	0.0622034	0.380136	-0.0163698	0.00013398	-0.0468116	0.0143079	-0.0313576
RPL10	2.54277e-08	0.0620569	0.00164372	-0.0379145	5.54821e-47	-0.152479	1	-0.00345713	0.0436404	-0.0287521	0.00751019	-0.0353759	0.000646766	0.0424177	0.962264	-0.00453681	1.62079e-06	-0.0565269	0.967327	0.00397446
RPS15A	4.0168e-06	0.0522237	1.17676e-15	-0.0874466	2.94979e-40	-0.141079	0.727638	0.00957784	0.0325194	-0.0299678	0.167482	-0.0221761	0.64129	0.011053	1	0.00193582	0.00028332	-0.0449404	1	-0.00107229
NCAPH2	0.000676975	0.0398592	3.83443e-05	-0.0477718	0.000202525	0.0425161	0.817075	0.0079122	1	0.00172491	0.594504	-0.0126413	0.598779	0.0118809	0.145344	0.0227596	1	-0.0024454	0.00653524	-0.0341304
HIPK1	0.128937	0.0204625	0.690619	0.00812942	0.0587982	-0.0238496	0.557607	-0.0125781	1	0.00312662	0.933277	-0.00563649	0.215391	0.0203605	1	-0.00320241	0.500986	-0.0136897	0.346176	-0.0155711
GPRC5B	0.0144232	0.0301078	0.0119796	0.0314468	0.00647126	-0.0323769	0.587113	-0.0120945	0.33593	0.0176694	0.132552	-0.0234694	0.0442549	0.0284913	0.66901	0.0107085	0.474592	0.0142229	0.983007	-0.00360121
MAN1A2	0.0182073	-0.029226	8.09057e-08	-0.0604693	0.352124	0.0139139	0.699366	-0.0100895	0.530041	0.0137864	0.49823	0.0144745	0.900736	-0.00581156	0.410868	0.0156963	0.0150357	0.0329392	0.00204575	0.037839
ACYP1	3.25369e-05	0.0475895	0.573139	0.0102858	0.370708	-0.0135455	0.00799513	0.0342467	0.346234	-0.0174608	0.0121726	0.0336945	0.369214	-0.016495	0.83544	-0.00746437	0.46679	-0.0143737	1.00158e-06	0.0563559
CLDN13	1		1		1		1		1		1		1		1		1		1
CD163	1		1		1		1		1		1		1		1		1		1
HDAC5	0.0187259	0.0291198	9.78174e-15	0.0847407	6.20882e-05	-0.0454605	0.437868	0.0147949	5.85185e-07	0.0582976	0.80041	-0.00866028	0.525985	0.0132579	1	0.00336903	0.743577	-0.00885569	0.757552	0.00798687
RALA	0.360834	0.0138706	0.0100294	0.0320745	0.00142348	0.0371466	0.508873	0.0134582	0.96358	-0.0052034	0.00621443	0.0360102	1	-0.000821153	0.677514	0.0105436	0.430552	-0.0151308	0.010592	0.0324622
VDAC3	1.64667e-09	-0.066773	1.07224e-07	0.0599428	0.0758777	0.0226677	1	0.0031425	1	0.00170625	1	-0.00107988	0.832611	-0.00728497	0.0953855	0.025017	1	0.000668321	0.0147664	-0.0312376
SLC1A7	0.596842	-0.00932399	0.397627	0.0137148	2.57441e-37	-0.135762	0.29003	0.0179406	0.33642	0.0176582	0.787657	0.00891301	1	-0.00168562	0.952638	0.00476698	0.436918	0.014973	0.377515	0.0149099
VPS72	0.308793	0.015027	0.739296	-0.00724882	0.710435	-0.00760912	0.25203	0.0188819	0.994753	0.00438479	0.894335	0.00660794	0.566294	0.0125063	0.22847	-0.0200681	0.847389	0.00672075	0.5445	0.0117502
GABPA	0.652726	0.00834917	0.812383	0.00590434	0.00142987	0.0371333	0.876512	0.00662503	1	0.00012647	1	0.00171984	0.98618	0.00374845	0.340124	-0.0173117	1	0.00222881	0.545379	0.0117336
BMP7	5.7141e-121	-0.243456	0.0932218	-0.0228416	2.81792e-75	-0.192916	3.49434e-11	0.0742151	6.36972e-12	0.0771407	1.92247e-13	0.082283	5.90505e-60	-0.173233	7.74825e-39	-0.139981	1	-0.00195776	5.86334e-39	0.139844
DYNLL1	3.39167e-17	-0.0914308	4.60159e-07	0.0571573	0.63347	-0.00885698	8.25614e-17	0.0914645	0.000110107	0.0470946	7.07485e-12	0.0772448	9.05215e-13	-0.0797792	3.77724e-15	0.0873035	0.00214747	0.039334	1.57384e-07	0.0599191
PDCL	0.0446826	0.0255848	0.470152	0.0122771	0.000619362	-0.0395261	0.59073	0.0120306	0.996202	-0.00433069	0.742139	0.0098498	0.938314	0.00496827	0.954962	-0.00470948	1	-0.00306785	0.188699	0.0195525
TMEM184B	0.195082	-0.0180634	0.219435	0.0180081	0.377895	0.0134047	0.604468	0.0117958	0.397157	0.0163994	0.614768	-0.0122782	0.58355	0.0121716	0.964081	0.00449411	0.427578	0.0151939	1	0.000354835
RSPH14	1	0.00172287	0.508881	0.0115194	1.10793e-05	-0.0494764	0.75476	0.00909997	0.844927	0.00790068	0.944954	0.00534629	0.607447	-0.011719	0.0351483	-0.029522	0.518989	-0.0133316	0.549193	0.0116665
NF2	1	-0.00120499	0.0850744	0.0233032	0.640163	0.00874863	0.679229	-0.0104603	0.367763	0.0169744	1	0.000866005	1	-0.00293493	0.725657	0.00958944	0.965844	-0.00396446	0.243321	-0.0180201
CABP7	0.0147245	0.0300312	7.56463e-12	-0.0755972	0.522252	0.0107484	0.932118	0.00538785	0.252874	-0.0196464	9.6748e-05	0.0475761	0.240711	0.0196356	0.461016	-0.0146656	0.000920911	-0.0417637	1.00432e-06	-0.0563496
ZMAT5	2.48237e-07	0.0578352	0.0554745	0.0253213	0.138049	0.0196646	0.960253	0.00470122	1	-0.00251674	0.0595369	0.0274036	0.112585	-0.024141	1	0.000886152	0.00769839	0.0353091	0.439847	0.0136662
EWSR1	0.996744	-0.00239248	0.727403	-0.00745597	0.108464	0.0209232	1	0.00313966	0.66153	-0.0113937	0.534511	0.0137973	0.958815	-0.00446279	0.287431	-0.0185443	1	-0.00128962	0.00230574	-0.0374653
AP1B1	0.00955158	-0.0315878	0.640315	-0.00904994	0.0002318	0.0421626	1	0.0024748	0.0314634	-0.0300937	0.149899	-0.0228123	0.683764	-0.0102474	0.555858	-0.0127999	0.193568	-0.0211148	0.308011	0.0164236
DERL3	0.843523	-0.0050805	0.210624	0.0182689	0.88154	-0.00459994	0.48113	0.0139755	1	-0.00196082	0.811006	0.00843139	0.772437	-0.00848239	0.682119	-0.0104544	0.130498	-0.0234722	0.050975	0.0262345
GSTT4	0.764152	-0.00640809	0.954383	0.00322634	0.880857	0.00461438	1	-0.00102404	1	-0.00111179	0.928754	-0.00576808	0.599398	0.0118707	1	-0.00215968	0.413536	-0.0155005	0.95267	0.00433968
TBX1	0.950959	0.00323729	0.625797	-0.00932612	0.000733484	-0.0390577	0.0101116	0.0334534	0.952168	0.0055742	0.247569	0.0198101	0.492155	-0.0139523	0.0705929	-0.0264937	0.313472	-0.0177941	0.00207519	0.0377926
GNAT2	0.522461	0.0106695	0.559997	0.0105209	0.0945383	0.0216128	0.542832	-0.0128375	0.719142	0.0103517	1	0.000996108	0.327347	0.0174588	0.984969	-0.003962	1	-0.000179669	1	0.00170324
BCL2L13	0.411178	0.0128229	0.114743	0.0217673	0.0183734	0.0286446	1	-0.00124364	0.924091	0.00628398	0.125725	-0.0237674	1	-0.00310401	1	-0.00111743	0.489308	-0.0139278	0.983927	-0.00356092
2610028H24RIK	0.973882	0.00282146	0.352993	0.0146737	1	-0.00199272	1	0.000945235	1	0.00029233	0.933277	-0.00563482	0.586188	0.0121274	0.84435	0.00728669	0.772686	0.00826457	0.917666	-0.0051193
SPATC1L	0.955691	-0.00315636	1	0.000392065	1	-0.00194011	1	-0.00174498	1	-0.00176125	1	-0.00210787	1	0.00258902	0.929211	0.00537337	0.534281	0.0130397	0.898706	-0.00551842
DQX1	0.76194	-0.00644891	8.82107e-05	0.0457715	0.000659943	0.039349	0.436626	0.0148266	1	0.000658389	0.323984	0.0179538	1	-0.00327769	0.994279	-0.00371369	0.997122	-0.00320217	1	0.00244694
LNPK1	1.70062e-12	0.0773269	0.171986	0.0195121	0.00233348	0.0356599	0.00104253	-0.0405275	1	-0.00341433	0.110548	0.0244437	0.202532	-0.0207442	0.614231	0.0117124	0.912303	0.00528667	0.884608	-0.00576832
PRR29	0.0991226	-0.0218354	0.29128	-0.0160864	1	0.000666079	0.863123	-0.00693168	0.961142	-0.00526531	0.697698	-0.0106547	0.143749	0.0228223	1	0.00163934	0.0436294	-0.0287311	0.694753	0.00910663
TMEM8C	1		1		1		1		1		1		1		1		1		1
FAM163B	0.00512424	-0.0337179	0.164351	-0.0197754	0.350478	-0.013949	0.038622	0.0284007	0.333939	0.0177091	0.280882	0.0189508	0.150132	-0.0225802	0.917054	0.0057247	0.0321183	0.0300219	0.0217068	-0.0297913
TRPM5	0.510361	-0.010879	0.88695	0.00453452	1	0.000890544	0.909434	0.00595792	0.959574	0.00533965	0.902768	0.00640182	0.852341	-0.00691302	0.716175	0.00975673	0.839451	0.00689841	1	-0.000827794
ASCL2	0.0295349	-0.0273277	0.32932	-0.0152	0.601122	0.00940553	1	0.000666552	0.961225	-0.0052606	1	0.00370259	0.608888	-0.0116807	0.00110343	0.0411626	0.0154613	0.0328232	0.059844	-0.0255248
RARRES2	0.438383	0.0122716	0.348146	0.0147846	1.24872e-07	-0.05866	0.985463	0.0040688	0.641509	0.0117271	0.980392	0.00435475	0.0996373	-0.0247379	0.1975	-0.0209789	0.164805	-0.0221271	0.0701039	0.024784
PTTG1IP	0.0164096	0.029624	0.00275771	0.0363288	6.63119e-16	-0.0874399	0.0030486	0.0373832	0.0339154	0.0297897	0.0719921	-0.026539	0.809847	-0.00775592	0.812911	-0.00788364	0.420932	-0.0153419	0.00443014	0.0354117
TRPM2	0.0557131	-0.0246173	0.301137	-0.0158535	0.453253	0.0119611	0.809789	-0.00805678	0.55689	0.0132731	0.988507	0.00412662	1	-0.000234594	0.901461	-0.00606352	1	-0.00168571	0.889368	0.00569064
UBE2G2	0.56157	-0.00994815	0.312623	0.0155911	0.0197325	0.0283751	0.841307	0.00741052	0.616185	-0.0121828	0.128115	0.0236624	0.774862	-0.00843479	0.758402	-0.00896157	0.878394	-0.00607123	1	-0.00309395
MPO	0.813894	0.00557422	0.588182	0.0100167	0.660505	0.0084268	0.873088	-0.00668969	0.961142	-0.00526525	1	0.00101647	0.693311	-0.0100657	1	0.00307977	1	0.00248128	0.938973	0.00462001
LPO	0.094171	-0.0220937	0.318701	-0.0154546	0.938897	-0.00347948	1	-0.00310472	1	-0.00249028	0.951599	0.00518187	0.123869	0.023632	0.747106	0.00916574	0.510237	-0.0135047	0.443614	0.0135961
MET	2.0499e-15	-0.0863724	0.00147036	-0.0382404	2.92777e-34	-0.129996	0.257661	0.0187415	0.560578	-0.0131946	0.165491	-0.02224	0.000481949	0.0432195	1	0.00277477	0.450075	-0.0147143	0.301424	0.0165707
SLC16A12	1	0.00157689	0.280236	0.0163522	0.782966	0.00634656	0.928558	-0.00549761	1	-0.00268006	0.908094	-0.00628034	0.695988	0.0100174	0.856419	-0.00702463	1	0.000846671	1	-0.00213111
SYN2	0.895669	0.00419962	0.00060669	0.0407549	1.28687e-58	-0.170351	0.161894	0.0215382	0.628927	0.0119332	0.545971	-0.0135869	1	-0.000449149	1.84353e-16	-0.0910725	0.000106006	-0.0473936	0.00860089	0.0331976
ELK1	0.00168911	-0.0371964	0.565174	0.0104352	0.00196111	-0.0361909	0.226676	-0.019559	0.556299	0.0132836	0.0867566	-0.025643	0.800483	0.00795029	0.675299	0.0105872	0.736904	0.00898989	0.619831	0.0104329
NAV1	4.52189e-73	-0.190112	1.72306e-33	0.128916	8.21378e-98	0.219502	0.97685	0.00430548	0.0874966	0.0256119	1.01659e-13	-0.083145	0.67231	-0.0104504	3.10356e-43	-0.147644	1.2732e-65	0.181611	1.07661e-98	-0.221114
TNPO1	0.329362	0.014561	0.23587	-0.0175388	0.307088	0.0148782	0.253057	-0.018859	0.317975	-0.0180493	0.150104	-0.0228024	0.140354	-0.022958	1	0.000398465	0.91756	-0.00517937	1	-0.00281556
MYOD1	0.622028	0.00888019	0.14863	0.0203585	1	-0.000945812	1	0.00296376	1	0.00186754	0.316614	0.018126	0.336282	-0.0172413	0.0367114	0.02935	0.274921	-0.0187938	1	0.00303788
OTOG	1	0.00168481	0.436362	0.0129351	0.0015257	-0.0369437	0.789647	0.0084348	0.392019	0.016494	0.995449	-0.00396755	0.95844	0.00447101	0.135337	-0.0231683	0.196913	-0.0210057	0.782797	0.0075484
RNMT	0.101705	-0.0216978	0.230825	-0.0176805	0.000728687	0.0390759	0.51887	-0.0132721	0.428298	0.0157491	0.895713	-0.00655139	0.993637	0.00356389	0.935986	-0.00518583	0.471488	0.0142879	0.00129181	-0.0392072
KCNQ1	0.888323	0.00433858	0.43836	0.012898	0.574426	0.00985612	0.975554	0.00434123	0.555077	0.0133051	1	-0.00271425	0.909765	0.0056064	0.875339	0.00662932	0.250697	-0.0194271	1	0.00256844
SRP14	2.52392e-25	0.111619	0.98598	0.00260838	1.52908e-09	0.0664497	0.685951	0.0103429	0.00877358	0.0348217	0.917688	-0.00604318	1	-0.00173657	0.103592	0.0245931	0.436509	-0.0149797	2.89093e-19	0.0980951
6330409D20RIK	6.32662e-07	-0.0560076	0.266686	-0.0166921	0.90838	-0.00411065	0.650117	-0.0109834	0.73583	-0.0100693	0.332602	-0.0177527	0.368154	0.0165185	1	-0.000524189	0.52061	0.0132982	0.752929	-0.00807735
CDK9	0.00586672	-0.0332669	0.410439	-0.0134555	6.79393e-08	0.059791	0.0354977	0.0287544	0.315543	0.018118	0.608957	0.0123738	0.719532	-0.00956026	0.0833661	-0.0256841	0.868957	0.00626933	1	-0.00251019
TOR2A	9.65288e-07	0.0551558	0.0906208	0.0229856	0.00442566	0.03363	0.683513	-0.0103825	1	0.00392529	0.0780975	-0.0261518	0.888598	0.00607521	1.87866e-05	-0.0512843	0.982756	-0.00357503	0.00776691	0.0335437
FPGS	0.034671	-0.0266706	0.0242064	0.0287965	1.49887e-16	0.0892816	0.776084	-0.00868855	0.959174	-0.00537146	0.169909	0.022082	0.561729	0.0125908	0.0182595	-0.0320461	0.0426341	0.0288288	0.0125093	-0.0318611
MKL2	7.76271e-10	0.0680106	0.0735582	-0.0240084	0.00258086	-0.0353484	0.0215038	0.0306919	6.35126e-05	0.0483976	0.000656388	-0.0426837	0.00686509	-0.0353669	1	4.71194e-05	0.169961	-0.0219358	0.380095	0.0148548
CBX5	0.000868094	-0.039157	1	-0.00232286	0.457118	-0.0118883	0.0120973	0.0328223	2.01225e-08	0.0644438	0.793049	0.00881506	0.124615	-0.0235988	0.513911	0.0136115	0.0177574	-0.0323269	0.901824	0.0054601
APOBEC3	2.56836e-13	-0.0799799	0.171813	0.0195191	0.182251	-0.0181338	0.06228	0.0263428	0.0731045	0.0264692	0.291908	0.0186862	0.134459	-0.0231951	0.279568	-0.0187562	1	0.000790231	0.00400504	0.0357324
TAF7L	0.998434	0.00235766	0.599546	0.00982014	0.961841	0.00304453	1	0.00252383	1	0.00160437	1	-0.00202977	0.903605	0.0057471	1	-0.00154937	1	-0.00165528	1	-0.00195035
SARDH	3.80256e-15	0.0855835	1.30268e-14	-0.0843693	0.984596	-0.00256124	1.10532e-24	0.111122	0.0245015	0.0311093	9.53084e-07	-0.0575878	0.925615	-0.00526743	1	-0.00169118	0.27707	0.018724	6.34629e-09	0.0656666
VAV2	0.0488057	-0.0251984	0.465346	0.0123806	0.00158418	0.0368305	0.32856	0.0170682	0.989738	0.00453199	0.523678	0.0139958	0.101557	-0.024647	0.246955	-0.0195753	0.149239	-0.0227154	0.907846	-0.00532569
TEX15	4.59509e-22	-0.104005	1.82234e-41	0.143523	1.84372e-32	0.126477	3.77111e-33	0.12884	2.80711e-11	0.0749614	1.2768e-14	0.0858966	1.54101e-24	-0.111059	0.0125596	0.0333856	0.202405	-0.0208407	1.34102e-06	0.0557712
PPP2CB	5.22329e-05	0.0464703	0.862462	0.00497513	0.0359249	0.0259847	0.613295	0.0116308	0.0349295	0.0296733	1	-0.00054294	0.891413	-0.00602848	0.599586	-0.0119947	0.724611	-0.00928689	1	0.0031076
G0S2	4.87225e-18	-0.0937255	0.353221	0.0146609	3.59331e-14	-0.0822703	1	0.00359465	0.0314048	0.0301026	1	-0.000840781	0.455847	-0.0146998	0.00844573	0.0347924	6.47993e-05	0.0485737	8.76589e-10	-0.0689795
DMAP1	0.399974	0.0130557	7.47345e-13	0.0788936	0.888115	0.0044793	0.188948	0.0206537	0.184888	0.021616	0.430408	0.0157266	0.865481	0.00665998	1	-0.0020171	1	-0.00195064	0.315167	-0.0162609
PLA2G12B	0.197818	-0.0179792	0.782435	-0.00643812	0.595141	-0.00949695	1	-0.00321931	1	-0.00263151	0.929377	0.00573486	0.658383	0.0107393	0.77627	0.00861483	1	-0.00241536	1	-0.00270885
MCU	0.990537	0.00250754	3.60986e-07	-0.0576283	0.202866	0.0175095	1.93338e-17	0.0931941	0.981425	0.00475436	2.429e-13	-0.0819678	0.467568	-0.0144626	0.639112	-0.0112594	0.118966	-0.0239527	7.12195e-09	0.0654668
OIT3	0.193438	-0.018116	0.516862	-0.0113656	0.667176	0.00830942	0.788897	-0.00844734	0.960854	-0.00528929	0.974148	-0.00452546	0.965756	-0.00430275	0.543503	-0.0130368	0.831406	0.00708762	0.826226	0.00682048
TEX11	1	0.000705246	0.518435	0.0113366	0.924315	0.00380015	0.930526	0.00543134	1	0.00420036	1	0.0014512	1	0.00237439	1	0.00223247	0.927581	-0.00495314	1	-0.00173824
BCR	0.00589729	-0.03325	5.70981e-22	0.104102	0.0112579	-0.0304508	0.418681	0.0151916	0.207245	0.0209281	1.85073e-10	-0.0723887	0.471685	0.0143647	2.56328e-07	-0.0599748	0.828797	0.00714765	0.177057	-0.0199454
FXYD5	0.0215648	-0.0285708	0.000248755	-0.043153	0.755028	-0.00682037	0.120728	0.0231278	0.0428387	0.028826	0.812458	-0.0083888	1	0.000250352	0.838907	0.00739252	0.942806	0.00457532	0.188396	0.0195638
KCND1	0.0514604	-0.024963	0.243317	-0.0173342	0.320354	-0.0145903	0.624268	0.0114511	1	-0.00160998	1	0.000657568	0.900684	0.00581313	0.945052	0.00497803	0.50859	0.0135363	0.388305	0.0146719
TFCP2	0.341446	-0.0142909	0.0651521	0.024583	1	0.00128804	0.540669	0.012878	0.903551	0.00675485	0.736718	-0.00994625	0.297536	0.018173	0.204649	-0.0207539	0.554049	-0.0126559	0.825789	0.00682805
POU6F2	1.76162e-23	0.10738	9.62563e-32	0.125484	8.94257e-234	-0.334082	6.56614e-05	-0.0476908	0.0420745	-0.028906	1	-0.00227716	3.547e-18	-0.0955002	4.00268e-17	-0.0929139	0.000489542	-0.0435086	7.44719e-30	0.122412
POU6F1	0.489124	0.0112666	0.230787	0.017682	0.968298	0.00291399	1	0.00164533	0.671778	0.0112079	1	0.00208537	0.583741	0.012167	0.291478	-0.0184311	0.754466	0.00861624	0.568752	0.0113145
UBP1	1	0.00137851	0.18915	-0.0189291	6.23252e-14	0.0815251	0.400833	0.0155518	0.865058	-0.00752712	0.521415	0.0140381	0.688328	-0.0101602	0.722313	-0.00965169	0.00332567	0.0379934	0.0159925	-0.0309413
NUAK2	0.0577983	-0.024445	1.52105e-32	0.127065	0.178568	-0.0182479	0.201446	0.0202809	0.0515538	0.0280401	1.96805e-06	0.0561386	0.477432	-0.0142508	0.00149177	0.0402574	4.81029e-11	-0.0744435	3.25805e-10	-0.0705807
ICK	0.0050118	-0.0337895	0.00558477	-0.034054	1.20721e-09	0.0668446	0.068444	-0.0259141	0.466087	0.0149962	0.557644	0.0133844	0.593421	-0.0120044	1	-0.0031943	0.859959	-0.00645956	0.195828	-0.0193411
SDHB	1.04869e-08	-0.0636196	0.0255529	0.0285839	4.05831e-09	0.0647969	1	0.000273226	0.778662	0.00921275	0.440574	0.0155255	1	0.000405333	1	0.00232569	0.0698022	0.0266437	0.0812795	-0.0240744
COX4I2	9.08099e-09	-0.0638696	2.55551e-08	-0.0625566	0.00381014	-0.0341135	0.714424	-0.00983533	8.84681e-05	0.0476201	5.23644e-07	-0.0587629	2.27941e-10	0.0716759	0.0643848	-0.0269416	5.73874e-08	-0.0628574	2.604e-06	0.0543964
SNAP47	3.82554e-45	-0.149549	0.327421	-0.0152466	1.50216e-06	-0.0537623	0.203668	0.0202059	1	0.00297952	0.362611	0.0170999	0.770592	0.00853186	0.266927	0.0190645	0.0400882	-0.0290848	0.0294239	0.0285677
WNT3A	1.38856e-06	0.0544175	5.81251e-45	0.14946	4.27882e-34	0.129676	5.55241e-10	0.0699455	2.14151e-15	0.0878932	1.21031e-16	0.0916968	0.0243774	-0.0309091	2.73321e-07	0.0598546	4.91856e-07	-0.0588653	1.74941e-147	0.268598
KDSR	0.0376557	0.026323	0.704265	-0.00788448	0.56977	-0.00993803	0.188158	-0.0206756	1	-0.00324657	0.325716	-0.0179091	0.134518	-0.0231904	0.59389	0.0121071	0.835566	-0.00699095	1	0.000943996
VPS4B	0.0576977	0.0244544	0.0426398	-0.0264662	0.0412032	-0.0254102	1	-0.00238095	0.784623	-0.00910204	0.570727	-0.0131146	0.976269	-0.00404095	0.683321	0.0104338	0.827726	-0.00716524	0.142225	-0.0211923
RPS25	3.26537e-11	0.0729842	0.158886	-0.0199767	0.576348	-0.00982173	0.918346	0.00572395	0.687289	-0.0109371	0.0608468	-0.0273168	0.0410935	0.0287999	0.944413	-0.0049923	0.115107	-0.0241304	0.990621	0.00339769
NXF2	0.922126	0.00374715	0.456729	-0.0125385	0.410673	0.0127577	0.852313	-0.00715589	0.145122	0.0229971	1	-0.00355665	0.437615	0.015046	0.722281	-0.00965445	1	0.000442573	0.916003	0.00515842
TAZ	0.828583	0.00532448	0.288504	0.016151	0.291435	-0.0152365	0.277749	-0.0182368	0.917556	-0.00642366	0.628352	-0.0120183	0.549969	0.0127922	1	0.00313441	1	-0.000732235	1	-0.000137437
KIF19A	0.0513386	0.0249754	0.251625	0.0171002	0.000705415	-0.0391665	0.286978	0.0180118	1	-0.000292896	1	0.00114969	0.159476	-0.022233	1	0.00074206	0.191791	-0.0211758	0.142743	0.0211712
ALDH3A2	0.629725	0.00875576	0.131272	0.0210384	1	0.000424646	1	-0.00122462	1	-0.00397534	0.644265	0.0117226	0.311552	-0.0178319	0.233647	-0.0199303	0.841712	0.00684235	0.309826	0.0163802
ZMYND10	0.0124152	-0.0306481	0.686224	0.00821276	0.0232476	-0.0277382	0.991166	0.00392283	0.989738	0.00454025	1	-0.000202209	0.738041	-0.00920286	1	-0.00196453	0.710599	0.00956632	1	0.00214725
TMEM115	0.00610635	0.0331297	1	0.00116808	1	0.00213773	0.432022	-0.014922	0.177109	0.0218755	0.758475	-0.00952386	0.64122	-0.0110566	0.508049	-0.0137257	0.950844	0.00438459	0.55418	0.011573
HYAL2	0.0307789	-0.0271628	0.0366665	0.0271095	0.729003	-0.0073035	0.982351	-0.00414559	0.952509	0.00556638	0.157645	-0.0225127	0.829605	0.00735884	0.87959	-0.00653259	0.766435	0.00838979	0.148944	-0.020943
IFRD2	0.00174411	-0.0371013	0.942253	-0.00349295	2.50298e-37	0.135786	0.000497708	-0.0425769	0.236171	0.0200796	0.014571	0.0330698	0.623359	0.0113935	0.292592	-0.0184076	0.117784	0.0240122	0.0124954	-0.0318657
HYAL1	0.249587	-0.0164762	0.57612	0.0102314	0.0026941	-0.0352115	0.950112	-0.00493281	0.953998	-0.00553383	1	-0.00124244	0.908769	-0.00563205	0.918726	-0.0056705	0.633374	-0.0110964	0.160646	0.0205045
TUSC2	0.368819	-0.0137	0.329894	0.0151863	4.66351e-05	0.0461608	1	0.000742799	0.747922	0.00980954	0.829125	0.00806233	0.625726	-0.0113219	1	0.00265331	0.504982	0.0136099	0.700059	0.0090271
NPRL2	0.796947	0.00584622	0.469362	0.0122956	0.329259	-0.0144015	1	0.00117412	1	0.00188719	0.569995	-0.0131339	0.757542	0.00881649	0.922785	0.00557951	0.440771	-0.014894	0.221197	0.0186064
SLC38A3	0.0156021	-0.0298171	0.00497178	0.0344418	0.0837222	-0.0222047	0.399807	0.01557	0.057121	0.0275977	0.972618	0.00457279	1	0.00262074	0.780321	-0.0085199	0.95967	0.00413784	1	-0.000673958
CACNA2D2	1.45993e-08	-0.0630382	1.21462e-08	-0.0638769	0.331376	0.0143558	0.640069	0.0111706	0.271723	-0.0191583	0.982769	0.0042745	0.98574	-0.00376455	0.918019	0.00569218	0.288741	-0.0184213	0.237831	0.018158
RASSF1	1.03983e-08	-0.0636344	0.0160732	0.03037	0.00159847	0.0368037	0.761703	-0.00895172	0.459109	0.0151279	0.0440448	0.0287272	1	-0.000182514	1	0.00159501	0.0546699	0.0277489	3.06717e-05	-0.0489636
EPN3	0.591442	-0.00942779	0.573804	-0.0102755	0.56556	0.0100054	1	-0.00242646	1	-0.0013555	0.923512	-0.00589012	0.0110649	0.033776	0.44016	-0.0150703	0.426987	-0.0152098	2.29068e-05	0.0496434
RNF112	0.00663643	-0.0328531	0.664592	-0.00861397	3.01534e-15	-0.0855172	0.998563	0.00370799	1	0.00314205	0.913065	0.00616994	0.176735	-0.0216216	6.20967e-07	-0.0582651	0.0191913	-0.0320417	0.0800895	0.0241501
SLC3A2	0.980539	0.00269471	0.0700094	-0.0242412	0.00713278	0.0320464	0.000955444	0.0407754	0.0137664	-0.0332322	0.580204	-0.0129268	0.020515	-0.0315496	0.300566	0.0182253	0.00775415	0.0352837	1	0.0030606
NXF1	0.583667	0.00955126	0.172174	0.0195046	0.972558	0.00282019	0.805659	0.00812931	0.605314	0.0123831	1	0.00212776	0.0813726	-0.0257419	1	0.00277566	0.17049	-0.0219147	0.657064	0.00979466
STX5A	1	-0.00104547	0.678956	-0.00834501	1.50054e-20	-0.0999844	0.973961	0.00438093	0.581744	0.0127977	0.834485	0.00793564	0.00114502	-0.04086	0.13209	0.0232954	0.0043211	-0.037177	2.90492e-05	0.0490915
SLC47A1	0.561395	-0.00995354	0.291238	-0.0160888	0.216279	0.0171237	0.946142	-0.00504407	0.931807	-0.00605632	0.000427568	0.0438266	0.601996	0.0118139	0.113467	-0.0241188	0.42887	0.0151609	0.0306481	0.0283968
PIFO	2.92842e-33	-0.128225	0.000521646	-0.0411694	0.0318568	0.0264837	0.824046	-0.00779319	1	-0.00260998	1	-0.00157063	0.838288	-0.00716753	0.00166779	-0.0399325	0.0150799	0.0329277	0.426518	-0.0139235
TNFRSF13B	0.949685	-0.00325694	0.328182	0.0152287	0.993126	-0.00239684	0.772673	-0.00875215	0.859252	-0.00764697	0.433369	-0.0156662	0.968019	0.0042526	1	-0.00232844	0.97569	0.00374071	0.993273	-0.0033482
SPIRE2	0.00108405	-0.0385186	0.0585347	0.0250748	1	0.000106481	0.000205905	0.0448929	0.0207027	0.0317471	0.0541416	0.0278364	6.71505e-05	-0.0481412	0.917495	0.00570741	0.945042	0.00453124	0.605087	0.0106906
PROX1	0.00035448	0.0416333	7.53837e-13	0.0788809	4.85168e-78	-0.19638	0.0276965	-0.0297392	0.877342	-0.00725219	3.00169e-10	-0.0716425	7.96421e-06	0.05292	0.00468086	-0.0367274	0.158412	0.0223592	0.0781614	-0.0242763
2610507B11RIK	3.02069e-06	-0.0528224	0.62279	-0.00937704	0.000311501	0.0413866	0.000365038	0.0434149	0.509085	-0.0142028	0.500506	-0.014426	0.8867	-0.00611391	0.563422	-0.0126657	0.386434	-0.0160847	0.397772	-0.0144896
AI597479	0.199233	0.0179341	0.117024	0.0216593	0.757593	-0.00677998	0.763419	-0.00891383	1	5.67229e-05	1	-0.000105558	0.355408	-0.016793	1	-0.00105064	0.365554	0.0165609	0.484527	-0.0128446
TMEM86A	0.114008	0.0211113	0.0248356	0.0286981	0.925717	-0.00376155	0.0389084	-0.0283699	1	0.00146947	0.0656353	-0.0269693	0.667813	0.0105457	0.280144	-0.0187337	0.769352	0.00833672	1	0.000492519
OPTC	0.034845	0.0266485	0.0875699	0.0231553	5.63997e-05	0.0457008	3.97896e-07	0.0584699	0.000302662	0.0445671	1	0.00294159	0.576741	-0.0122969	0.573759	0.0124822	0.0116528	-0.0338761	4.17016e-23	0.107602
TEX14	0.0140536	0.0302028	0.0118609	-0.0314825	0.777051	-0.00644249	0.930279	-0.00544367	0.000290297	0.0446755	0.272268	-0.0191648	0.770981	0.00852558	0.965055	-0.00446825	0.485033	0.0140171	0.066588	0.0250337
IFI35	0.860086	0.00480883	0.354369	-0.0146346	0.853311	0.00511027	0.865813	-0.006862	0.307096	0.0183094	0.691088	-0.0107771	1	-0.00186046	0.918068	-0.00568975	0.658932	-0.0105966	0.880019	-0.00584692
RDM1	0.0208291	0.0287093	9.03913e-05	-0.0457104	4.81734e-18	-0.093426	0.867281	0.00681703	0.199367	0.02118	0.710639	-0.0104257	0.597582	-0.0119111	0.00464031	0.0367609	0.144508	0.0228955	8.92709e-08	-0.0609828
NEDD8	0.150944	-0.0195863	0.0141327	0.0308496	2.15331e-16	0.088837	0.0172927	0.0315157	1	-0.00200632	0.0019682	0.0395665	0.0674557	-0.0266253	0.733466	0.00942695	3.89925e-05	0.0497708	0.638943	0.0100966
GOSR1	0.231841	0.0169662	0.888813	0.00449705	0.616086	-0.00914907	1	-0.00257036	0.667094	-0.0112853	0.62851	0.012013	0.716586	-0.00961219	0.882063	-0.00648747	0.673716	0.0102938	0.572838	0.0112401
MRPL52	1.02548e-06	-0.0550346	3.8805e-08	0.0618106	7.36475e-08	0.0596399	0.809412	0.00806405	1	-0.00229849	0.302549	0.0184359	0.00358556	0.037451	0.00517075	-0.0364069	1	0.000437319	9.23025e-06	-0.0516869
KANSL3	0.957178	-0.00312613	0.372139	-0.0142608	0.845211	0.00525401	0.837367	-0.007498	0.133077	0.0234518	0.383089	0.0166574	0.404462	-0.015735	1	0.000497401	1	-0.00285226	0.774617	-0.00768737
EYA4	3.01426e-08	0.0617486	4.21867e-09	-0.0656887	0.0256959	0.0273418	1	-0.00315939	0.00727445	0.0354181	2.49478e-13	0.0819297	0.0540256	0.0276346	1	-0.00310876	5.66478e-07	0.0585914	5.75487e-13	0.079962
EBF3	0.602029	-0.00922248	1.12507e-07	0.0598532	0.0704139	0.0230186	6.9581e-07	0.0573947	1.70949e-05	0.0513632	2.18217e-11	0.0756069	1.73203e-09	-0.0684435	0.0354264	0.0294898	1.20032e-19	-0.0998046	1.84375e-11	0.0749889
MYT1	7.3757e-05	0.0456372	4.62654e-13	-0.0795632	0.542766	-0.0103804	5.92602e-07	0.0577063	3.24795e-05	0.0499358	0.360834	-0.0171438	0.0150795	-0.0326758	0.910286	0.00587033	0.137949	-0.0231702	1	-0.00235465
FAF1	1.32268e-06	-0.0545199	0.0358201	0.027205	4.314e-10	0.0685297	1	0.00140257	0.117958	-0.024109	0.534511	0.0137913	0.929139	-0.00517282	0.030446	-0.0300916	0.225557	0.0201481	0.74936	0.00814099
GM266	5.31129e-12	0.0756849	6.33969e-39	0.139049	0.0656061	0.0233448	4.38493e-17	0.0922237	2.3685e-09	0.0680248	0.751519	0.00966555	0.934691	0.00505358	0.981293	0.00406393	0.977147	0.00370677	0.000384592	-0.0426241
TSACC	0.555617	-0.0100541	0.65252	0.00882177	1	-0.00106832	0.475471	0.0140807	1	0.000646489	0.212666	-0.020765	0.930802	-0.00513951	1	5.28656e-05	0.897326	-0.00562857	1	-0.00205802
METTL16	5.41219e-05	-0.0463854	0.687267	0.00819087	8.16233e-18	0.0928026	0.785329	0.00851689	1	0.00390026	0.59324	0.0126743	0.982123	-0.00390878	0.781357	-0.00850233	0.0445603	0.028644	0.0036787	-0.0360044
DAZL	0.810692	-0.00562358	0.328005	0.0152333	0.14274	-0.0194876	0.979463	0.00424321	1	0.00332091	1	-0.00203852	1	-2.95267e-05	0.489125	-0.0141081	1	-0.00214428	1	-0.000785212
APOL7A	1		1		1		1		1		1		1		1		1		1
PIGYL	0.0310715	0.0271228	0.442205	0.012819	0.152956	0.0191104	0.429713	-0.0149728	0.454448	-0.0152127	0.931956	0.00567144	0.690068	0.0101324	1	-0.000887005	1	0.00278617	0.628096	0.0102696
RBM25	0.13929	-0.0200221	0.618703	-0.00945234	1.11965e-05	0.0494517	0.107559	-0.0237413	0.82155	-0.00840068	0.843421	-0.00775371	0.0394786	0.0289775	0.905076	0.00597886	0.415091	0.0154558	0.0921351	-0.0234642
PSEN2	0.00428989	-0.0342956	0.839677	0.00538821	0.0454556	0.0249927	0.193792	0.0205086	0.585526	-0.0127296	0.775274	-0.00917025	0.18942	0.0211797	0.118251	-0.0239082	0.460688	-0.0144951	0.675557	0.00948553
ACAA1B	0.0614217	-0.024155	0.79095	-0.00629714	0.150053	-0.0192177	0.909326	0.00596069	0.924685	0.0062746	1	-5.74921e-05	1	-0.00191917	0.205457	-0.0207257	0.721525	0.00935457	1	-0.000517931
PLCD1	1.47952e-24	-0.109873	0.013049	-0.0311397	5.24812e-07	-0.0558896	0.896037	0.00620828	0.33588	-0.017671	0.00337268	-0.0379425	1.25713e-12	0.07932	1	3.32447e-05	4.4276e-07	-0.05907	0.000210307	0.0442149
FADS1	0.108404	-0.0213704	3.94508e-06	0.0528021	0.104743	-0.0211036	0.43964	-0.0147492	0.522073	0.0139445	0.00754865	-0.0353558	1	-0.00231781	0.0143763	-0.0329009	0.0980196	0.024985	0.0293839	-0.0285738
LMBR1	2.22693e-06	0.053455	0.506823	0.0115575	2.68435e-23	-0.106701	0.228214	-0.0195135	0.555007	0.0133096	1	-1.73608e-05	0.839589	-0.00714582	0.0722448	-0.0263773	0.857202	0.00652606	0.0699268	0.024798
TNFRSF22	0.168761	0.0189378	0.172267	0.0195004	0.47352	0.0115974	1	-0.000772227	0.483568	-0.0146746	1	0.00287581	0.167732	-0.021936	0.798491	-0.0081694	0.613245	0.0114867	0.322938	0.016086
CARS	0.00023272	-0.0427455	4.45314e-05	0.0474215	8.02364e-20	0.0981224	0.456434	-0.0144282	0.398409	0.0163692	0.79242	0.00882828	0.839007	-0.00715472	0.423113	-0.0154224	1	0.000134457	0.924564	0.00494292
PHLDA2	0.0631292	-0.0240256	1.272e-111	-0.234243	0.987543	-0.00249693	3.09899e-277	0.362231	5.76593e-55	-0.165987	2.44202e-38	-0.139262	1	-0.00194397	0.876367	0.00659882	0.112863	-0.0242391	3.96331e-11	0.0738386
ASZ1	1		1		1		1		1		1		1		1		1		1
WNT2	9.87356e-05	0.0449269	0.0115714	-0.0315677	1	-0.00186123	1	-0.00169023	0.15784	0.0225287	0.707737	-0.0104906	0.804652	-0.00785324	0.384495	0.0162639	0.554049	0.012656	0.000817621	0.0405426
GABRA1	0.0217546	-0.0285335	0.663784	-0.00863028	0.244265	0.0163787	0.891987	0.0063146	0.55821	0.013242	0.479729	0.0148064	0.00399527	-0.0371046	0.998508	-0.00358288	0.00755945	0.0353817	0.938404	-0.00464288
GRID2IP	0.882467	-0.00443769	0.418923	0.0132849	0.649375	0.00859856	1	-0.00179188	1	-0.00259789	0.646061	-0.0116795	0.374908	0.0163735	0.267963	-0.0190304	0.831971	-0.0070739	1	0.00140515
KDELR3	0.182474	0.0184809	0.0976575	-0.0226153	1.57038e-42	-0.14504	2.16891e-31	0.125376	0.247593	-0.0197847	0.972038	0.00458652	0.283112	-0.0185375	0.925632	-0.00552604	0.0741905	-0.026343	1	0.00145126
APIP	0.000145504	-0.0439549	0.0241444	0.0288073	0.104145	0.0211312	0.000734828	0.0415124	0.00108524	0.0411423	0.256037	0.0195908	0.382859	-0.0161918	0.920979	0.00561914	0.361244	-0.016676	1.18721e-06	0.0560151
PDHX	0.135395	-0.0201898	0.584649	0.0100727	0.070321	0.0230264	0.147954	0.0220558	0.343052	0.0175223	0.824214	0.00815553	0.303805	-0.018022	0.91895	-0.00566318	1	-0.00185298	0.00680729	0.0339923
VAC14	0.0371349	-0.0263821	0.563949	0.0104563	0.000620407	0.0395212	0.89595	0.00621257	0.985241	0.00464979	0.738383	-0.00992134	0.390269	-0.0160336	1	0.0026189	1	0.00247939	0.773866	-0.0077006
MCOLN2	0.879224	-0.00449519	0.916543	0.00397931	0.680106	0.00810276	1	-0.000439297	1	0.00216924	1	0.00278439	1	-0.00314278	0.535213	0.0132098	0.9429	0.00457374	0.0427095	0.0270177
SLC5A1	0.00797213	0.0322256	0.974472	0.00282365	1	0.000971378	0.00310792	-0.0373143	0.0303292	-0.0302527	0.680692	-0.0109968	0.323678	-0.0175504	0.516943	0.0135467	0.914528	0.0052445	0.113483	0.0223968
AKT1S1	0.0732316	-0.0233325	5.13924e-06	0.0522421	0.0116161	0.0303391	0.00152755	0.0394372	0.23173	0.0202309	0.00294768	0.0383545	0.423744	-0.0153148	0.317463	0.0178128	0.431169	0.0151114	0.00186065	-0.0381242
TBRG1	2.24191e-05	-0.0484474	0.0475896	0.025987	0.114917	0.0206285	0.880352	-0.0065388	3.1311e-05	0.050018	0.02436	0.0310989	1	-0.00145664	0.0747579	-0.0262228	0.479211	-0.0141425	0.00692749	0.0339369
ADSSL1	7.68955e-08	-0.0600458	3.09011e-05	-0.0482725	4.41801e-05	-0.0462897	0.365362	-0.0162684	0.425767	0.0158115	0.909295	-0.00623861	0.23019	0.0199243	0.284461	0.0186128	0.674384	0.0102751	1	-0.00262272
CFAP161	1		1		1		1		1		1		1		1		1		1
BRF1	0.936389	-0.00349225	0.744315	0.00715257	0.547396	0.0103007	1	0.00193643	1	0.00321046	0.987303	0.00415916	0.789175	0.00816255	0.771896	-0.0087049	0.847853	0.0067109	1	0.00285171
VIPR2	0.087136	-0.0224714	0.00395988	0.0351841	0.0546505	0.0241789	1	-0.00276928	0.814535	0.00857148	1	-0.000441338	6.5032e-05	0.0482205	0.334422	-0.0174326	0.0764745	-0.0261897	0.467161	-0.0131663
ODC1	3.83679e-50	-0.157625	0.000354101	0.0422199	5.69956e-139	0.260492	0.00016811	-0.0454096	0.0052366	-0.0364658	5.21078e-08	0.0630653	0.0639731	-0.0268556	0.95185	-0.00479154	1.09938e-20	0.102393	1.11329e-65	-0.181122
THG1L	0.323543	-0.0146892	0.341817	0.0149239	1.56404e-10	0.0701469	0.823652	-0.00780617	0.856402	0.00769556	0.536067	0.0137604	0.870837	0.00653997	1	0.000259377	0.537977	0.0129689	0.0129936	-0.0317168
ADAM19	0.831783	-0.00528044	0.569639	-0.0103568	0.00319529	-0.0346732	1	-0.00120001	0.653294	-0.0115381	0.901025	-0.00644469	0.18981	0.021168	0.0583487	0.0273749	0.177419	0.0216699	0.266965	0.017408
PABPC4	2.02576e-05	-0.0486829	0.274275	0.0164934	2.20842e-23	0.106902	0.66992	-0.0106414	0.989195	0.00455397	0.0300105	0.0302887	0.000142584	-0.0463368	0.900389	0.00608634	0.346789	0.0170017	3.01111e-11	-0.0742532
EXOC3L2	0.68131	-0.00782906	0.319092	0.0154461	0.431797	0.0123515	1	0.00141668	1	-0.000937456	0.0426298	0.0288622	0.61508	-0.0115521	0.194076	-0.0210898	0.866425	0.00631648	0.538687	0.0118616
ZFP296	0.15771	-0.0193322	0.680049	0.00832049	0.468582	0.0116839	1	-0.00220746	0.617969	0.0121476	0.871863	-0.00711409	0.975824	0.00405376	1	-0.00190278	0.472684	0.014255	0.487195	-0.0127954
PLIN5	4.22346e-07	-0.0568078	0.010083	-0.0320524	0.000350391	-0.0410734	0.00181671	0.0389315	0.529007	-0.0138032	0.864479	-0.00728403	0.919743	0.00539222	0.820017	0.00774865	0.315323	-0.0177423	0.632456	0.0102023
SUGP1	1	-0.000551246	0.989139	-0.00255257	0.95658	-0.00313961	0.571883	-0.0123351	0.945049	0.00577028	0.81258	0.00838676	0.717494	-0.00959584	0.58343	-0.0122881	1	0.000118764	0.928956	-0.00485075
DMRTC2	0.731447	-0.0069944	0.830537	-0.00556138	0.861367	0.0049689	0.83373	-0.00758255	0.957214	-0.00542711	1	0.000130903	0.825946	-0.00743056	1	0.00252108	0.483331	-0.0140581	0.736078	0.00838745
DHDH	0.00268302	0.0357915	1.85245e-05	-0.0494433	0.00029738	-0.0415087	0.0222872	-0.0305468	0.186082	-0.0215753	0.00230686	-0.0390895	1	0.00289347	1	-0.00303923	0.552985	-0.0126858	1	0.00284441
ZFP790	0.602029	-0.00922265	1	-0.000825051	0.346006	-0.0140407	0.797151	0.00829978	0.627737	0.0119588	0.662881	-0.0113535	1	-0.00279437	0.306839	-0.0180876	0.820868	0.00730795	0.848475	0.00641768
CPB1	1	0.00190747	0.786357	-0.00637536	0.0735292	-0.0228182	0.204212	-0.0201907	0.403923	-0.0162623	0.714424	-0.0103539	0.984335	-0.00384234	0.264943	0.0191085	0.074779	-0.0263053	1	0.000942155
SLC25A41	0.984119	-0.00261727	1	-0.00115266	0.703192	-0.00772813	0.878646	0.00657727	0.69191	0.0108505	0.546125	0.0135737	0.286156	-0.0184607	0.663546	-0.0107981	0.709067	0.00960009	1	-0.00288467
FSD1	9.02668e-29	-0.119132	0.381023	-0.0140619	0.08487	-0.0221366	0.791262	0.00839607	0.647849	-0.0116242	1	-0.00169519	0.428813	0.0152168	0.3024	0.0181842	0.843268	0.00680991	0.92596	-0.00491123
PINLYP	0.673377	-0.00796186	0.822934	-0.00572586	0.836035	-0.0054323	0.868244	-0.00679932	0.942564	-0.00583882	1	0.00363173	0.693232	0.0100672	1	0.00234792	0.305281	-0.0180072	0.970842	0.00387234
FUZ	0.00694156	0.0327	2.88175e-05	0.0484349	1.73915e-07	-0.0580333	7.34364e-05	0.0474214	0.611663	0.0122666	0.973726	0.00455111	0.466117	0.0144984	0.796066	-0.00821704	0.0199079	-0.0319016	0.517974	-0.0122352
SPTBN4	0.0408131	-0.0259748	1	-0.00214934	0.0347112	0.0261288	0.630557	0.0113407	1	0.00361558	0.716515	-0.0103238	0.221562	0.0201717	0.7594	-0.00893197	0.643576	-0.0109096	0.000942527	0.0401314
PGAM1	2.81774e-70	0.186466	0.103923	-0.0222918	0.206255	-0.0174111	0.514498	-0.013355	0.300769	0.0184601	0.969754	-0.00466823	0.648259	-0.0109208	3.46513e-07	0.0594049	0.0032807	0.038037	0.000818726	-0.0405382
EVI5	8.74923e-11	0.0714718	0.20789	0.0183517	0.752294	-0.00687252	2.18379e-05	0.0502103	0.209907	-0.0208532	1	0.000684004	0.392444	-0.0159811	0.0202697	-0.031653	0.232065	0.0199563	0.275735	0.0171898
EVI5L	0.241296	0.0167001	0.533403	0.0110348	0.774521	-0.00648678	1	0.00179379	0.583808	0.0127637	0.995604	0.00395551	0.915034	-0.00549698	0.256898	-0.019318	0.78192	-0.0080845	0.000254784	0.0437103
SNAPC2	0.642511	0.00853154	0.353181	0.0146644	0.0399971	0.0255352	0.463415	0.0142921	0.237639	0.0200433	0.979144	-0.00438865	1	0.00106651	0.588144	-0.0122048	0.836783	0.00695488	0.0720592	0.0246507
GIT1	0.510906	0.0108683	0.169412	-0.0196004	0.000144234	0.0433825	0.392827	-0.0157138	1	-0.00203155	1	-0.00117376	0.805916	-0.00782728	0.514558	-0.0136002	0.851537	0.00662882	0.509344	0.0123919
GLTP	3.06659e-06	-0.0527904	0.0189399	-0.0297488	0.421522	0.0125531	0.0236968	-0.030325	0.00633762	-0.0358781	0.110862	-0.0244295	0.0134025	0.0330966	0.321952	0.0177083	4.76377e-07	-0.0589338	0.0131784	0.0316644
BNIP2	2.53347e-11	-0.0733629	0.0325581	-0.0276002	0.61062	0.00924132	1	0.00229187	0.46045	0.0151039	0.0582522	0.0275002	0.120893	-0.023764	0.895663	0.00620221	0.17508	0.0217598	0.000134188	0.0453733
CCNT1	4.72013e-06	-0.0518807	0.426305	0.0131383	0.00512882	0.0331529	0.986347	0.00404772	0.205294	0.0209867	0.118732	0.024061	0.210989	-0.0204843	0.997769	0.00361219	0.0353644	0.0296388	0.00235698	-0.0374016
SCARF2	0.390468	-0.0132526	0.492746	-0.0118363	0.00123578	-0.0375633	1	0.00307638	0.766883	-0.0094127	1	-0.00188167	0.663974	-0.0106146	0.167286	-0.0219637	1	0.000950846	0.850698	0.00638659
4930579F01RIK	1		1		1		1		1		1		1		1		1		1
BRMS1L	0.000240921	-0.0426502	0.321141	-0.0153947	0.00421365	-0.0337904	0.532149	0.013041	1	-0.0016366	0.0492306	-0.0282474	0.142399	0.0228676	0.000516052	0.0432551	1	0.00277219	1	-0.00196287
MED15	0.685988	0.00775097	0.250418	0.0171326	0.00242865	0.0355343	1	0.000185858	0.931687	-0.0060601	0.243394	0.0199204	0.982527	0.003901	0.316316	-0.0178419	0.347088	0.016992	1	-0.00251501
DHDDS	1.35695e-15	-0.086889	0.000920519	-0.0395933	5.6608e-05	0.045691	0.918252	-0.00572726	0.229129	0.0203124	0.381359	0.0167047	0.424899	-0.0152901	1	0.00186427	0.288697	0.0184241	0.783797	-0.00753551
AIM1L	0.000109958	-0.0446554	0.0865454	-0.0232119	0.0311147	0.0265797	0.815096	-0.00796408	0.683495	-0.0110065	1	-0.000750734	1	0.00197789	1	-0.00347625	1	0.0021645	0.325681	0.0160238
UBXN11	0.630315	0.00874171	0.436289	-0.0129377	0.829575	0.00553027	0.883823	-0.00646671	1	-0.00164432	0.885823	-0.00685767	1	0.00222188	0.984969	-0.00396296	1	0.000344077	0.817888	-0.0069574
MOGAT1	0.236545	0.0168254	0.79664	-0.00618929	0.653637	0.00853185	1	-0.000265848	0.578171	0.0128763	0.731238	0.0100588	0.672708	0.0104409	0.0433867	-0.0286304	1	-0.000174261	0.727358	0.0085353
TEX22	0.187514	0.0183149	0.538338	-0.0109447	0.423913	0.0125044	0.35651	-0.0164721	0.504339	0.0143018	0.643366	0.0117404	0.510979	-0.0135544	0.950244	0.00483451	0.535209	0.0130187	1	-0.00176501
WNT8A	1.87376e-132	0.25444	5.15262e-74	-0.191471	0.948882	0.00330829	0.00601109	-0.0351814	0.00497709	-0.0366256	5.83914e-161	0.280783	1.48331e-10	0.072338	0.818728	-0.00777442	7.00986e-11	-0.0738576	1.3379e-39	-0.140991
TJAP1	0.102214	-0.0216726	0.693944	0.0080751	0.00628447	-0.0324758	0.261865	0.0186428	0.416807	0.0159942	0.883511	0.00689957	0.343487	0.0170728	0.936024	0.00517778	0.104902	0.0246215	0.525142	-0.0121039
EHF	1		1		1		1		1		1		1		1		1		1
NANOG	1	0.000985242	0.576165	0.0102295	0.448727	-0.0120398	0.41819	-0.0152017	0.800315	-0.00882322	0.80041	-0.00865763	0.452485	-0.0147681	0.983094	-0.00401141	0.945898	-0.00450445	0.341038	0.0156949
RPL15	2.64229e-10	0.0697426	0.311951	0.0156057	6.30227e-09	-0.064042	0.528792	-0.0131081	1	-0.00303249	0.560033	-0.0133387	0.475365	0.0142954	1	0.00221019	0.369539	-0.0164711	1.60249e-05	-0.050455
TMEM167	5.59077e-09	-0.0647157	7.16123e-10	-0.068612	1.44554e-06	0.0538417	0.0213961	-0.0307121	0.571837	-0.0129964	0.809411	0.00845419	0.488614	0.0140262	0.494341	-0.0139815	0.0115389	-0.0339068	0.916003	0.0051609
STEAP4	0.747432	-0.00669987	0.859182	-0.00504226	0.914083	0.00398519	0.865512	-0.00686954	0.952168	-0.00558775	1	0.00130575	0.283645	-0.0185267	1	0.000914061	1	0.00139941	1	-0.00154147
MPLKIP	0.517163	0.0107573	8.76093e-05	0.0457886	0.58282	0.00970741	0.485952	0.0138773	1	-0.00329073	0.395186	0.0164058	0.814085	-0.00768993	0.00489725	0.0365842	0.0776722	0.0261109	0.0347982	-0.02788
KIF11	0.0408037	-0.0259762	0.0916383	0.0229305	2.44844e-17	0.091491	0.00526254	-0.0356329	0.671614	0.0112109	0.572979	-0.0130664	0.693843	-0.0100544	0.367218	0.0166735	0.576061	-0.0122053	0.012419	-0.0318865
RPA3	0.0958751	0.0220012	0.000283799	0.0428093	0.463817	0.0117668	0.218134	0.0197884	0.957013	-0.00543033	0.684302	0.0109165	0.879065	0.00633361	0.394766	0.0160398	0.965375	0.003975	0.846937	-0.00644837
MLKL	0.920361	-0.0037724	0.0619139	-0.0248264	0.298598	-0.0150732	0.851067	-0.007181	0.988826	0.00456054	0.607905	-0.0124008	0.623359	0.0113935	0.0470482	0.0282916	0.680099	-0.0101504	0.89009	-0.00567153
PHOX2B	4.75149e-56	0.166634	2.84545e-10	-0.0700911	1.59187e-11	-0.0736496	0.871989	-0.00671732	1.32305e-38	-0.139359	3.85572e-16	0.0902813	1.5171e-15	-0.0881987	0.582102	0.0123144	1.08349e-29	-0.122676	1.59091e-15	-0.0877625
TNPO3	0.155494	-0.0194145	8.57393e-07	0.0559314	7.82235e-13	0.0780183	0.169673	0.021272	0.073213	0.02646	0.326209	0.017899	0.00208707	-0.0391123	0.929371	0.00536348	1	-0.00185866	0.00661141	-0.0340904
TTLL5	0.497421	-0.0111123	0.961452	0.00309393	1	-0.00209386	0.733712	-0.0094678	0.399865	0.0163343	0.481884	-0.0147705	0.516162	-0.0134515	0.89348	-0.00626842	1	0.00204509	0.488463	0.012772
ZFP715	0.932753	0.00356448	0.571054	-0.010329	0.77819	0.00642691	0.499363	0.0136241	1	0.000273813	0.268743	-0.0192654	0.962336	-0.00438181	0.599586	0.0119947	0.500907	-0.0136913	0.871672	0.00600236
RETN	0.298085	-0.0152803	0.967213	-0.00298198	0.48596	-0.011386	0.729537	0.00954342	0.445133	0.015407	0.787204	-0.00892976	1	-0.00303487	0.358921	0.0168447	0.662829	0.0105319	0.476423	-0.013003
ACPT	0.484531	0.0113555	0.693944	-0.00807509	0.715722	0.00752591	0.725427	-0.00962738	0.976123	0.00490064	0.811685	-0.00841822	1	-0.000220881	1	0.00163124	1	-0.00126568	0.986838	-0.00347583
CDH23	0.225225	-0.0171497	0.86568	-0.00491909	0.664091	0.00836381	1	-0.00126055	1	-0.000943423	1	-0.000725191	0.999438	-0.00340494	0.551568	-0.0128829	0.877383	-0.00609197	0.870166	0.00603137
RPS5	1.97666e-09	0.0664679	0.8359	-0.00547023	1.09732e-23	-0.107619	0.274484	0.0183263	0.856414	-0.00769478	0.0564019	-0.0276504	0.210426	0.0204981	0.0604339	-0.02722	1	0.00123586	0.000459922	0.0421507
PODNL1	0.223431	-0.0172018	0.475504	-0.0121757	0.931973	0.00363212	0.978425	-0.00426	1	-0.00327503	1	-0.00295935	1	9.8173e-05	0.662086	-0.0108212	1	-0.000924944	1	-0.00145599
ADGRL1	0.253769	-0.016364	7.4327e-14	-0.0820604	8.07765e-05	0.0448202	1	0.00122417	0.0587581	0.027475	0.908284	-0.00627055	0.00781075	0.0349537	0.330186	-0.0175258	0.434266	-0.015037	0.00722287	0.0337977
AMOTL1	3.00333e-09	-0.065768	0.334509	0.0150859	4.25188e-11	-0.0721633	0.653813	-0.0109184	0.55832	-0.0132393	0.914753	-0.00613354	0.970646	-0.00419085	0.224747	-0.020174	0.0951545	-0.0251363	0.0696514	0.0248154
2200002J24RIK	0.771461	-0.00628946	0.496923	0.0117539	0.726764	0.00733888	0.755342	0.00908032	0.877066	0.00726072	0.825711	0.00812802	0.738558	-0.00918759	0.802995	0.00808905	1	0.00305836	0.994947	-0.00331936
ETV5	0.618958	0.00893174	3.01582e-63	0.177128	0.00603722	0.0326109	5.14303e-33	0.128578	0.000408765	-0.0437834	1.54822e-48	-0.156593	4.91954e-142	0.26384	7.43498e-81	-0.201015	2.62108e-14	-0.0849919	4.80568e-05	0.047901
TMEM190	0.0562613	-0.024575	0.83741	-0.00543132	9.44989e-25	-0.110092	0.852114	0.00715985	0.830864	0.00817861	1	-0.00248506	0.516502	0.0134454	0.832958	-0.00752218	0.0639591	-0.0270402	0.0915453	0.0234936
GFOD2	0.330794	-0.0145311	0.127896	0.0211832	0.00325182	0.0346181	0.785485	-0.00850322	0.877237	-0.00725596	0.534511	-0.0137922	0.400274	0.0158244	0.199155	-0.0209257	0.416383	0.0154299	0.14442	-0.021108
ENKD1	2.33948e-10	-0.0699339	0.0991151	-0.0225413	8.06353e-07	0.0550276	0.107379	0.0237497	0.875481	0.00729376	0.155632	0.0225875	0.841532	-0.00710442	1	0.00258931	0.152317	0.0225951	0.0337172	-0.0280129
4933405L10RIK	0.465224	-0.0117415	0.857271	0.00508321	0.457859	0.0118722	0.917972	-0.00573384	0.967037	-0.00513609	0.518152	-0.0141061	1	-0.00213325	0.793907	0.00828886	0.513721	-0.0134424	1	0.0030058
ATP6V0D1	0.536861	0.0103893	0.0316424	-0.0277204	5.41664e-06	-0.0510482	1	0.00230248	0.00700292	0.0355474	0.394488	-0.0164201	0.0350731	0.0294845	0.820017	0.00774503	0.000120114	-0.0470789	1.02292e-07	0.0607272
PTPRS	0.190392	0.0182177	5.15056e-08	-0.0612931	1.44846e-08	-0.0625837	0.0246469	-0.0301738	9.9476e-11	0.0730196	0.0233843	-0.0312628	0.26234	-0.0190623	0.916354	-0.00574313	0.125692	-0.0236714	5.49463e-05	-0.0475864
SLC41A1	0.00883825	0.0318649	0.573934	-0.0102711	0.0130285	-0.0299249	0.139121	-0.0224009	0.208684	0.0208883	0.0590689	-0.0274395	0.13543	-0.0231562	1	0.000803873	0.7881	0.00794971	0.0192587	-0.030246
IGLON5	1.35441e-14	-0.0839288	0.0454187	-0.0261908	0.000224824	-0.0422443	0.18109	-0.0209135	0.776706	-0.00925599	0.619785	-0.0121907	0.503144	-0.0137371	0.366595	-0.0166855	0.727175	0.00923188	0.0695748	0.0248218
IGF2BP1	2.62178e-67	0.182508	2.64127e-05	-0.0486396	0.42026	-0.0125754	2.44921e-21	-0.103213	0.000441118	-0.0435864	1.29148e-07	-0.0614226	0.0181128	0.0320092	0.0892141	0.0253584	0.530084	-0.0131255	0.0146438	-0.0312719
B4GALNT2	0.875593	0.0045572	0.558753	-0.0105455	0.588414	0.00961136	0.70803	-0.00993791	0.713763	0.0104532	0.989345	-0.00411052	0.295628	-0.0182183	0.918141	-0.00568263	0.555294	0.0126329	1	0.000348052
ZFP651	0.687458	-0.00772309	0.0895752	-0.0230418	0.184029	-0.0180763	0.477579	-0.0140426	0.182113	-0.0217102	0.677544	-0.0110492	0.0187641	-0.0318737	0.936024	-0.00517534	0.805213	-0.00763349	0.00119754	-0.0394352
NELFB	0.56082	0.00996397	1.99631e-14	0.0838083	0.00132043	-0.03737	0.913014	-0.00585518	0.738202	-0.0100114	0.0614251	-0.0272664	0.977584	0.00400922	0.314521	-0.0178899	0.207523	-0.0206917	0.152862	0.0207942
CARD14	1	-0.0021817	0.831769	-0.00554108	0.982577	0.00260184	0.639714	-0.0111841	0.783321	-0.00912882	1	-0.00369159	0.590716	-0.0120478	0.899119	-0.00611994	1	-0.00219763	1	0.00162066
TMEM175	1.88102e-05	0.0488529	0.110547	0.0219572	0.000326418	-0.041261	0.836679	-0.00750994	1	0.000441324	0.826355	-0.00811312	0.576741	-0.0122952	0.803618	0.00806648	0.962844	-0.00403278	0.0376465	0.0275419
BCAS1	1.00146e-07	-0.0595535	0.927447	-0.00377619	6.83349e-09	-0.0639046	0.764893	0.00888664	0.312953	0.0181761	0.79097	-0.00885342	0.0895022	0.0252741	0.560277	-0.0127235	0.00226558	-0.0391755	0.000384919	0.0426208
TANGO2	0.191068	0.0181956	0.126062	0.021263	0.024955	-0.0274628	0.803174	0.00819068	0.0161564	0.0326537	0.961271	-0.00492488	0.375332	-0.0163603	0.119176	-0.0238703	0.376477	-0.0163159	8.61827e-06	0.0518343
ALDH1A2	0	-0.44105	6.90931e-180	-0.295007	4.78203e-14	0.0818842	7.16182e-16	-0.0888296	1.00769e-10	-0.0729985	2.14495e-10	-0.0721592	0.000556514	0.0428213	3.92377e-109	-0.23264	3.42906e-33	-0.129725	0.008111	0.0333961
NDUFS2	0.060618	0.0242194	1	-0.000298073	0.000648246	-0.0394	0.021765	0.0306431	1	-0.00145413	0.473552	-0.0149287	0.0181275	0.0320048	0.340134	-0.0173092	0.869055	-0.00626759	0.114581	0.0223429
SNX31	0.682869	-0.00780118	0.698727	-0.00798587	1	-0.00142995	0.791996	-0.00838633	1	0.000220828	0.646061	0.011682	0.978163	0.00399266	0.989023	0.00386167	1	-0.00301008	0.0124277	0.0318835
ATRAID	1.70277e-16	0.0894764	0.0810828	-0.0235444	1.16294e-12	-0.0774599	0.185482	-0.0207689	0.280471	-0.0189421	0.955931	-0.00508281	0.484508	-0.0141106	1	0.000492758	0.0326123	-0.0299619	0.155756	0.0206836
CAD	0.0632211	-0.0240179	0.137214	-0.0208016	1.04976e-24	0.109986	1.59099e-15	-0.0878384	0.072311	-0.0265275	0.891863	0.00667252	0.840549	-0.00712492	1	0.00103381	1.2284e-12	0.0797878	7.76194e-10	-0.0691792
LYPD8	1		1		1		1		1		1		1		1		1		1
SH3BP5L	0.137028	0.0201181	0.245119	0.0172835	0.317309	-0.0146603	1	0.00239764	1	-0.000277034	1	0.00222189	1	-0.000810273	1	-0.00231117	0.784474	-0.00802385	1	0.000656406
ATAD1	0.0726877	-0.0233739	0.497826	0.0117397	0.120121	0.0203984	0.021376	-0.030717	0.0358967	-0.0295561	0.945027	-0.00534428	0.116707	0.0239481	0.432932	-0.0152325	0.911189	-0.00531355	0.00199977	-0.0379074
PTEN	8.39401e-42	-0.14389	0.456534	0.0125423	5.34181e-05	-0.045831	6.55884e-11	-0.0732653	0.525957	-0.0138722	0.000503502	0.0433826	1.95309e-14	-0.0849278	0.15508	-0.0223856	1.98435e-12	-0.0791058	8.96919e-05	0.0463851
PEA15A	3.88925e-21	-0.101733	7.16799e-58	0.169484	1	0.000996417	1	-0.00192408	0.619358	0.0121188	5.84402e-05	-0.0487602	1.44276e-07	0.0607855	9.62737e-10	-0.069621	0.0445222	-0.0286481	5.23443e-08	0.0619617
TIMM23	0.103705	-0.0216013	0.535758	-0.0109952	0.00263103	0.0352878	1	0.00320055	0.84987	-0.00780733	0.0570474	0.0275925	1	-0.00140778	1	-0.000159124	0.849809	0.00666817	0.463017	-0.0132517
TNFAIP8L2	1	-0.00133193	0.616574	0.00950031	0.814492	0.00580599	1	6.72846e-05	1	-0.000542805	0.906756	-0.0063035	0.717629	0.00959282	0.748578	-0.00914332	1	0.00274113	1	-0.00124486
TRNT1	2.82289e-05	-0.0479187	2.57057e-05	-0.0487013	6.26074e-37	0.135044	0.642602	0.0111166	0.630451	0.0119082	2.87358e-05	0.0504051	0.192481	-0.02106	0.990409	0.00383169	0.0264267	0.0307877	0.00141893	-0.0389244
LY6G6E	0.101705	-0.0217004	0.829552	-0.00558074	0.0121458	-0.0301778	1	-0.00140945	1	-0.00057218	0.795244	-0.00877385	0.228713	0.019969	1	0.00322198	0.98469	-0.00352024	0.989753	0.00341394
EHMT2	0.528708	-0.0105459	0.963198	0.00305616	0.0931784	0.0216881	0.029319	-0.0295267	0.944648	-0.00577731	1	0.000299447	1	-0.00196687	0.014483	-0.0328741	0.631329	-0.0111387	0.760189	0.0079414
ELOF1	0.0313121	0.0270901	2.45053e-15	0.0865199	3.10034e-11	0.072644	0.651967	0.0109549	0.821052	0.00841011	0.644562	0.011716	0.62386	-0.0113827	1	0.00322809	0.0368072	0.0294741	0.396901	0.0145102
MED16	0.00308387	-0.0353527	0.000998699	-0.0393578	0.406191	-0.0128439	1	0.00145831	0.137228	0.0232935	0.599235	-0.012553	0.555563	0.0126899	0.628309	0.0114805	0.719601	-0.00938938	1	0.00210769
ST3GAL1	0.00398602	-0.0345283	1	0.00165874	0.920485	-0.00386977	0.758541	-0.00901386	1	-6.8586e-05	0.129101	-0.0236151	0.0161115	0.0324356	0.00660949	-0.0356172	0.516091	0.0133879	0.495135	0.0126517
TMEM259	0.592501	0.0094057	0.476533	0.0121574	0.398155	0.0130102	0.669466	-0.0106535	0.131305	0.0235328	0.440175	-0.0155336	0.495645	0.0138856	0.474013	0.0143952	0.751997	0.00866426	0.169682	-0.0201892
RNF170	0.0753532	0.0231944	0.667503	-0.0085555	0.820018	-0.00570395	0.782517	-0.00856727	1	0.00340531	0.840627	-0.00780936	0.653365	-0.0108261	0.25876	0.0192568	0.796126	-0.00780335	0.000329004	0.0430377
CLIP3	3.96036e-10	-0.0690975	0.449638	-0.0126824	7.69116e-53	-0.161754	0.318924	0.0172805	0.162094	0.022375	0.00613861	-0.036056	0.0402528	-0.0288925	0.372226	0.016555	1	-0.00280536	0.642718	-0.0100374
THAP8	1	0.000201518	1	-0.00189282	1	0.00122356	1	0.000981115	0.971531	-0.00499689	0.21654	0.0206622	0.665482	-0.0105881	0.97993	0.00411988	0.606166	0.011626	0.357671	0.0153225
MYL2	0.28612	-0.0155617	0.33944	-0.0149821	0.449455	0.0120258	1	-0.00345132	0.676665	0.0111235	1	-0.00237577	0.906044	-0.00569322	0.787434	-0.00839836	0.27769	-0.0187028	0.00930154	0.0329223
DEDD	0.232556	0.0169421	0.970481	0.00290281	0.96044	-0.0030685	0.193141	0.0205293	0.805168	0.00873015	0.50722	-0.0142881	0.512194	-0.0135273	0.799736	-0.00814414	0.605582	-0.0116458	1	0.000160535
MCEMP1	1	-0.00121438	0.934731	0.00363052	0.976334	0.00273272	0.840368	-0.00743255	0.954532	-0.0054967	0.961432	-0.00491686	0.994288	-0.00354634	0.99701	0.00363325	0.819653	-0.00733111	1	-4.25157e-05
NIT1	0.912225	-0.0039053	0.615996	0.00951102	0.407886	0.0128106	0.967075	-0.00454667	1	-0.00109174	0.251142	-0.0197155	0.892434	-0.00600894	0.0988021	-0.0248275	0.91861	-0.00515565	0.0921018	0.0234663
PAX5	6.64652e-46	0.150815	0	0.574637	2.23956e-50	0.157919	1.29063e-10	0.0722274	0.765524	0.0094332	2.24308e-47	-0.154727	2.3287e-233	0.334357	6.44422e-95	-0.2174	0.000625472	0.0428428	6.07296e-08	-0.0616855
PRDM15	0.829735	-0.00531007	0.515401	-0.011396	0.210222	0.0172956	0.219737	-0.0197432	0.965617	-0.00515824	0.561343	0.0133155	1	0.00168264	1	-0.00345494	0.971539	-0.00383086	0.745634	0.00820908
RNF168	0.00598084	0.0332023	0.903398	-0.00421684	0.0216582	0.0280156	1	0.00285609	0.993462	-0.00443934	0.381702	-0.0166956	0.414258	0.0155269	0.966587	0.00442126	0.870154	0.00623996	0.123199	0.02196
TCTEX1D2	1.0506e-14	-0.0842626	0.309157	0.0156676	0.00174789	0.0365367	0.49017	0.013804	0.412009	-0.0160963	0.627108	0.0120364	1	-0.00298069	0.00104967	-0.0413032	0.00124363	0.0409247	1	0.000700146
CHP1	5.05614e-05	-0.0465477	0.373721	-0.0142245	1	0.0010964	1	-0.00361144	0.331563	0.0177548	0.925578	0.00582854	1	-0.00209398	1	-0.00227739	1	0.00246408	1.80515e-08	0.0638647
TRPV4	0.253108	-0.0163801	0.704265	0.00788478	0.00658901	-0.0323148	1	0.000570605	0.943672	0.00579917	1	-0.000393651	1	-0.00124667	0.324746	-0.0176422	0.418754	-0.0153847	0.694513	0.00911101
KLHL3	0.321981	0.0147273	0.126776	-0.02123	0.00268247	-0.0352263	1	-0.00295317	0.000154011	0.046264	0.125751	-0.023764	0.852361	-0.00691155	0.776619	-0.0086088	0.976938	0.00370956	0.780406	-0.00758706
TVP23B	0.000756399	-0.0395497	0.246143	-0.017258	4.69935e-12	-0.0754497	0.538761	0.0129142	1	-0.00219966	0.13412	-0.0234043	0.027708	0.0304168	0.323637	-0.0176657	0.000420851	-0.043907	0.0564911	-0.0257875
DNAJC7	0.333717	-0.0144643	0.970481	0.00290316	0.906235	0.00414876	1	-0.0016263	0.000688538	0.042382	0.00913055	0.0347144	0.234222	0.0198123	1	-0.00119617	0.787977	-0.00795286	0.793974	-0.0073565
ZFP385C	0.0077175	0.0323362	0.536071	-0.0109885	0.318644	-0.0146304	0.00306888	-0.0373576	1	-0.00285593	0.637361	-0.0118591	0.00241679	-0.0386678	1	0.00243086	1	0.000757371	0.0140477	0.0314238
CACYBP	3.70655e-19	-0.096696	0.0107992	0.0318152	1.03566e-273	0.359738	0.148992	-0.0220171	0.000258473	-0.0449742	8.64369e-18	0.0948399	0.0467904	-0.0282525	0.491596	-0.0140555	1.15054e-16	0.0918224	2.35677e-27	-0.117153
CLUAP1	0.00970246	-0.0315336	0.132318	-0.0209933	0.150029	0.019219	0.457597	-0.0144029	1	-0.00402145	0.728649	0.0101122	0.436219	0.0150784	0.00768193	-0.0351198	0.711992	0.00953127	0.0103937	-0.0325302
ZSWIM7	1	-0.000355746	0.405102	-0.0135695	0.00445711	0.0336065	0.696436	0.0101564	0.000804489	0.041966	0.481798	0.0147736	0.000461238	-0.0433382	0.306659	0.0180959	0.367803	0.0165096	0.108603	0.0226305
PIGL	0.414086	-0.0127686	0.386687	0.013947	0.0833609	0.0222272	0.19235	0.0205564	0.926101	-0.0062417	0.643371	0.0117382	0.993062	-0.0035771	1	0.0034738	0.860213	0.00645456	0.184927	0.0196708
NDUFA2	0.595965	0.00934149	2.98039e-07	0.0579926	1.36125e-10	0.0703653	0.715354	0.00981938	0.137223	-0.0232946	0.477117	0.0148647	0.758047	0.00879474	0.38568	-0.0162376	0.41123	0.0155504	0.0164442	0.0308338
PAM16	1	0.00206908	8.8254e-08	0.0603055	0.382988	0.0133048	0.102822	0.0239553	0.385716	-0.0166219	0.000502733	0.0433895	0.973585	0.00412161	0.787167	0.00840295	0.886273	0.00586821	1	-0.00180349
GLIS2	9.06263e-28	-0.117004	0.853152	-0.00515407	0.613583	0.00919109	0.00970319	-0.0336009	0.714238	0.0104383	0.0229955	-0.0313311	0.504613	-0.0136965	1.59873e-07	-0.0608518	0.994443	0.00327155	0.773068	-0.0077131
COX6C	0.00349997	0.0349463	0.00878112	0.0325374	0.0019068	0.0362771	0.166973	0.0213694	0.0546717	-0.027802	0.0140125	-0.033203	0.568411	0.01246	0.447083	0.0149333	0.736895	0.00899346	0.00237807	0.0373696
BICC1	2.20387e-53	0.162631	1.65215e-14	0.0840557	6.15409e-67	-0.181994	1.27721e-05	0.0513983	1	-0.000106098	5.06548e-14	-0.084072	1.12211e-05	0.0521758	1.62868e-43	-0.148124	0.0588229	0.027424	1	-0.00148621
UBE2Z	0.109116	-0.0213388	0.693944	0.00807572	0.0642367	0.0234427	0.959212	0.00472627	0.17972	0.021788	0.99476	0.00399123	1	0.0017113	0.690171	-0.0102702	0.472684	-0.0142538	1.3947e-05	0.050777
GIP	0.689656	-0.00768288	0.655183	-0.00877885	1	-0.000442649	1	-0.0017967	0.574799	0.0129403	0.711444	-0.0104067	0.440702	0.014995	1	0.00180203	0.204705	-0.0207711	1	2.93425e-06
TMEM87B	0.428251	-0.0124781	0.867583	0.00488699	0.793881	-0.00616353	1	-0.000153353	0.995581	-0.00435306	0.848493	0.00765096	1	-0.00116866	1	-0.00195618	0.884125	-0.00594137	0.0954451	0.0232942
ANAPC1	0.664988	0.00812022	0.917683	0.00395502	1.61594e-05	0.0486244	1	-0.00322552	0.745196	-0.0098535	0.837502	-0.00787882	0.753715	-0.00888489	1	-0.00303968	0.258843	0.0191948	1	0.000625101
MERTK	0.844551	0.00506576	0.2371	-0.017504	0.00689509	-0.0321637	0.0129677	-0.0325814	1	0.000462248	0.681742	0.0109743	1	-0.00187014	0.297985	-0.0182833	0.0364798	-0.0295089	0.0398572	0.0273135
TSG101	0.0541915	0.0247389	0.189483	-0.0189168	0.000509661	-0.0400615	0.13322	-0.0226257	0.91323	0.0065071	0.289676	0.0187411	1	0.00265083	0.950166	0.00485827	0.878865	-0.00606329	0.0491514	0.0263983
HPS5	0.0130341	0.0304768	0.852795	-0.00516019	0.532419	-0.0105652	0.262107	-0.0186329	0.829559	-0.00820263	0.142631	-0.0230789	0.998111	-0.00344203	0.126825	-0.0235474	0.203319	-0.0208127	0.167395	0.020259
MAP3K4	4.43728e-08	0.061052	0.507851	-0.0115388	0.412545	-0.0127207	0.000301261	-0.043898	0.876857	-0.00726411	0.000156091	-0.0463994	0.984706	0.00379864	1	-0.00128578	0.881539	-0.00600779	0.00446589	-0.0353845
PIEZO1	0.0225299	-0.0283966	0.000124585	-0.0449133	2.43763e-05	-0.0476832	0.960054	-0.00470879	0.948092	-0.00566811	0.0886316	0.0255412	0.378934	-0.0162869	1	0.000750967	0.181456	-0.021523	0.309675	0.0163848
BLK	0.215331	0.0174376	0.758817	0.00687726	1	0.000956757	0.213165	-0.0199233	0.364684	-0.0170382	0.702336	-0.0105777	1	-0.00140622	1	-0.000466992	0.73282	0.00910073	1	0.00203202
RNF166	1	-0.00126744	0.12744	-0.0212033	0.1072	-0.0209819	1	0.000430123	0.392223	-0.0164854	0.731238	-0.0100614	0.273874	-0.0187757	0.881164	-0.00650203	1	-0.00152448	1	-0.00214413
ANKRD28	0.47823	-0.0114922	2.72721e-11	-0.0737102	0.857724	-0.0050337	0.669721	-0.0106487	1.33157e-05	0.0519048	0.990845	-0.00407258	0.000743122	-0.0420354	1	0.00131984	0.522808	-0.0132553	0.00503054	-0.0349956
ANKRD52	0.0684851	-0.0236549	0.638961	-0.00907405	0.329576	0.0143949	0.277749	-0.0182362	0.497955	0.0144225	1	-0.00283027	0.404753	-0.0157289	1	0.00267479	0.284752	0.0185299	1	-0.000737863
PKD2L2	0.904018	-0.00405383	0.735717	-0.00731166	1	0.00197099	0.730654	0.00951932	0.573969	-0.0129521	1	0.000604408	0.919237	0.0054035	0.689621	0.0102818	1	-0.00157521	0.968064	-0.00393507
SRP19	3.98768e-10	-0.0690861	0.551609	0.0106666	9.69017e-15	0.0840032	0.741848	0.00932817	1	0.00115863	0.0755575	0.0263138	1	0.00272868	1	-0.00345169	1	-0.00125552	0.607537	0.0106425
WDFY2	1	0.00229243	1	-0.00152973	0.133749	-0.01983	0.0116115	0.0329668	0.499982	-0.0143889	0.395528	-0.0163957	1	-0.000803894	0.73277	0.00944416	1	0.00311846	0.612346	0.0105643
RBSN	0.185686	0.0183735	0.025443	0.0286016	0.0692308	0.0230986	0.816248	-0.00794495	1	-0.00334957	0.654488	-0.0115233	0.975524	-0.00406038	1	0.000618518	0.434415	-0.0150255	0.964441	-0.00405036
MRPS25	0.643966	-0.00850719	2.43659e-15	0.0865281	1.14193e-20	0.100281	0.685739	0.0103492	0.621162	0.0120828	0.129037	0.0236189	1	-0.000311853	0.4325	-0.0152403	0.19986	0.0209144	0.732975	-0.00844513
DGUOK	0.626105	-0.00881465	0.881748	-0.00463704	0.0122953	0.0301342	0.141401	-0.0223139	0.765746	0.00942701	0.122474	-0.0239045	0.148142	0.0226618	0.104295	-0.0245563	0.976938	0.00370997	0.38734	-0.0146947
CAMTA1	0.492044	-0.0112098	0.0833724	-0.023406	0.0308176	-0.0266172	5.51889e-10	0.0699569	0.531379	0.0137621	1	-0.00206765	0.817675	0.00759911	0.37443	-0.0165051	4.89535e-10	0.0708675	0.000157366	-0.0449703
CSF1	3.40081e-09	0.0655598	0.721326	0.00755783	0.84095	0.00534023	0.00339256	-0.0370397	0.952168	-0.00557463	0.463378	-0.0151134	0.382859	-0.016194	0.813971	-0.0078587	0.73282	-0.00909869	0.904584	-0.00540362
STRIP1	0.0068132	0.0327635	0.343827	0.0148763	0.388228	0.0132053	0.930553	0.00542722	0.000139102	-0.0465131	0.265243	-0.0193578	0.274699	0.0187536	0.000729818	-0.0423243	0.451028	-0.0146908	0.104713	0.0228205
KIF1A	2.15123e-05	-0.0485428	1.61951e-59	-0.171865	0.88901	-0.00446724	0.364391	-0.0162891	1.30977e-19	0.0993129	3.28558e-08	-0.063888	0.972329	0.00414919	0.0335825	-0.0297053	1.65232e-08	-0.0650473	1.18559e-07	0.0604568
ALX3	0.000502155	-0.0406877	0.809882	-0.00595091	0.123229	0.0202662	0.95219	0.00487709	1	0.000629264	1	0.00355373	0.276118	-0.018716	0.320938	-0.017744	0.355555	0.0167939	1	-0.000161634
SLC25A11	0.892054	-0.00426087	0.530078	0.0111096	8.93477e-06	-0.0499553	0.0971459	0.0242417	0.113258	0.0243161	0.783095	0.00900491	0.434198	0.0151192	1	-0.000990877	0.0468551	-0.028423	1.03495e-05	0.0514365
CHRNE	0.657447	-0.00826118	0.361461	0.0144772	0.468297	0.0116889	0.702966	0.0100274	0.831023	0.00817642	0.851805	0.00757409	0.840222	-0.00713771	1	0.00129603	0.803979	-0.00766093	1	0.00286604
CMC2	1.5861e-09	0.0668357	9.4127e-05	0.0456088	1.86171e-20	0.0997442	1.56458e-05	-0.050945	0.816262	-0.00852758	0.906399	-0.00631467	1	0.00219283	1	0.000604496	1	-5.03623e-05	0.367088	0.0151205
CHFR	0.160797	0.0192192	0.0604357	-0.0249362	0.000976702	-0.0382418	0.408198	0.0154014	0.40762	0.0161904	0.309731	0.0182737	0.579783	-0.0122367	0.135715	-0.0231541	0.031165	-0.0301452	1.69123e-05	0.0503328
CEACAM16	1		1		1		1		1		1		1		1		1		1
HOXA2	0	0.561391	0	-0.484063	0.0102299	0.0307905	0.00102055	0.0405886	2.93426e-179	0.295169	4.90851e-08	-0.063171	4.61704e-14	-0.0837844	1.33375e-06	0.0567736	3.07535e-15	-0.0877309	6.30379e-16	-0.0889282
ADAM28	0.951757	-0.00322195	0.270582	0.016584	1	-0.0012324	1	-0.000805038	0.829559	0.0082055	0.887831	-0.00679399	0.0931405	0.025071	0.39642	0.0159998	0.832783	0.00705826	1	-0.00225035
TEX261	0.0236919	0.0281935	5.41306e-07	0.0568435	7.83325e-05	0.0448963	0.0994867	0.0241222	0.294708	0.0185997	0.0757156	0.0263011	0.036792	-0.0292842	0.519825	-0.0134902	0.00075679	0.0423165	0.990621	-0.00339742
FAM120B	0.753945	0.00658551	0.0618654	0.0248315	0.774283	0.00648997	0.191191	0.0205874	1	-0.0030889	1	0.0015228	0.843918	-0.00706317	0.996451	0.00365338	0.128018	-0.0235674	0.00983732	0.0327162
TBP	0.366199	-0.0137541	0.778445	-0.00651885	2.75878e-05	0.0473961	0.532149	-0.0130441	1	-0.00405146	0.685089	0.0108876	1	0.00246193	0.813014	-0.00787926	0.532751	0.0130776	0.879607	-0.00586225
PSMB1	0.00232708	-0.0362308	0.0054351	0.0341481	0.502979	-0.0110918	0.00218813	0.0383817	0.241074	0.0199474	0.67294	0.011154	0.658016	0.0107458	0.984969	0.00396141	0.935841	-0.00476422	1	-0.0016519
PDCD2	0.0816638	-0.0227903	0.0142394	-0.0308219	2.57341e-08	0.0615538	0.253716	0.0188358	0.0179546	-0.0322887	1	-0.000723578	0.563783	0.0125542	1	0.00102596	1	-0.000597889	5.57376e-06	-0.0527829
DLL1	0.0066933	-0.0328236	0.0119037	0.0314691	1.16512e-32	0.126873	8.50768e-05	0.0470736	1.00102e-05	0.052541	0.0621147	0.0272076	4.24147e-26	-0.114539	0.067544	-0.026711	0.813674	-0.00744559	0.399147	-0.014463
NOL3	0.36324	-0.0138159	0.121343	-0.021462	0.0971156	-0.0214825	0.973296	0.00439204	0.244342	0.0198614	0.901608	0.00642513	0.656288	-0.010771	1	0.00183887	0.534281	0.0130394	1	0.00186459
FHOD1	0.372455	0.0136286	7.83059e-05	0.0460638	0.0212446	-0.0280893	0.708304	-0.00993316	0.471098	0.0149081	0.969466	-0.00468196	0.589909	-0.0120622	0.0125524	-0.0333893	0.00609675	0.0360727	0.990621	-0.00339727
PLEKHG4	0.621499	0.00888949	0.189361	0.0189215	0.966658	0.00295278	0.995196	-0.00383156	0.442892	-0.0154483	0.572775	-0.0130761	1	0.000227149	0.189171	-0.0212395	0.922536	0.00506179	0.883748	0.00578689
SLC9A5	1	-0.000431315	0.817296	-0.00582862	0.914255	-0.00397798	0.749074	-0.009207	0.885067	-0.00711771	0.984581	0.00422275	0.898377	0.00586661	0.806545	-0.00801405	0.00306806	0.0382659	0.908642	-0.00531034
ELMO3	0.39957	-0.0130662	0.432618	-0.0130096	0.0843714	-0.0221658	0.986626	0.00403208	1	0.00105286	0.951619	0.00518102	0.00321664	0.0377834	0.412935	0.0156562	0.580666	-0.0121165	1	0.00105625
STC1	0.0714797	0.0234535	0.00954639	0.0322474	0.0191674	0.0284843	0.000398945	-0.0431813	0.00508728	-0.0365571	0.0113395	-0.0339576	0.314495	-0.0177619	0.308127	-0.0180494	0.0199137	0.0318994	0.150012	-0.0208988
4931428F04RIK	0.436261	-0.0123126	0.000363023	-0.0421529	0.00246602	-0.0354868	0.0119057	0.0328783	1	0.00305527	0.124425	-0.0238219	0.185814	-0.0213083	0.347046	0.0171507	0.574939	-0.0122279	1	0.00290347
TPPP3	2.32864e-11	0.0734895	0.396291	-0.0137426	8.39463e-08	-0.0593992	0.370307	0.0161759	0.000284966	0.0447282	0.000416641	0.0438914	0.0448087	-0.0284353	0.755267	0.00902337	0.0741764	-0.0263458	1.57638e-05	0.0504914
MSH3	0.652013	-0.00836027	0.724382	0.0075052	0.0557731	0.024087	0.998669	-0.00370116	1	-0.00061831	0.670702	-0.0111991	1	0.000934884	0.962084	0.00454086	0.0710675	0.0265533	0.6048	0.0106956
ADAMTS13	0.931564	-0.00358129	0.420422	0.0132589	0.385742	0.0132503	0.535207	0.0129839	0.99522	-0.00436445	0.617342	-0.0122326	0.758047	0.00879884	0.593979	-0.012104	0.882082	0.00598744	1	-0.00279887
TMEM208	1	0.00204205	0.179243	-0.0192593	0.289111	0.0152923	1	0.00300457	0.979207	-0.00482441	0.181206	0.0217231	0.855907	-0.00684236	0.28006	0.0187381	1	-0.000378191	1	-0.00270404
E2F4	0.000202978	-0.0430966	0.501735	0.0116625	1.06326e-29	0.120873	0.226116	-0.0195744	0.7214	-0.0103099	0.271584	0.0191861	0.282541	-0.0185513	0.036755	-0.0293432	0.0057777	0.0362467	9.6288e-09	-0.0649506
SURF4	0.00706626	-0.0326393	0.059415	0.0250093	0.00819503	-0.0315663	0.0223485	0.030536	0.308331	0.0182847	0.0853341	0.0257218	6.87618e-05	-0.0480847	0.0883485	0.0254045	0.978607	-0.00367197	0.00137534	0.0390164
SURF2	0.0669091	-0.0237638	0.778992	0.00650726	7.72436e-20	0.0981647	0.164511	-0.0214516	1	-0.00260915	1.61571e-06	0.056539	0.674324	-0.010413	0.95965	-0.00460984	0.912556	0.005281	2.03653e-09	-0.0675854
DNAJB9	0.040498	0.0260086	0.945708	0.00340628	1	-0.00158241	0.928702	0.00549218	0.757966	0.00957641	0.985844	0.00419251	0.639119	-0.0110901	0.998508	-0.00358621	0.977278	-0.00370273	0.561268	-0.011452
NAF1	0.0515884	-0.0249518	3.86992e-08	-0.0618161	3.34962e-25	0.111125	1	0.000561806	0.0233264	-0.0312939	1	0.00147236	0.983941	-0.00386991	0.00244628	-0.0387917	0.851938	0.00662064	0.0767839	-0.0243645
YES1	1	-0.00145643	0.110265	-0.0219734	0.318533	-0.0146328	0.708467	-0.00992952	0.589162	-0.0126648	1	-0.000803756	0.596032	-0.0119623	0.634586	-0.0113616	0.841099	0.00686069	1	-0.000976724
PPP1CB	0.00524788	-0.0336358	4.0055e-16	-0.0887977	6.63025e-11	-0.0714848	0.581451	-0.0121854	0.927842	0.0061908	0.12821	-0.0236584	0.935723	-0.00503633	0.441005	0.0150522	0.930543	-0.00488247	0.266585	-0.0174235
GORASP2	0.0771748	-0.0230766	0.0309376	0.0278147	0.158619	-0.0189086	0.324087	0.0171644	1	0.000324881	0.665807	0.0113	0.684001	-0.0102394	0.487671	0.0141437	0.672656	-0.0103146	0.0288333	0.0286621
TSEN15	9.672e-11	-0.0713172	1	-0.000139898	5.33816e-22	0.103578	0.83658	0.00752374	0.103568	-0.0247972	0.0753691	0.0263241	0.690883	0.0101143	0.514523	-0.0136015	0.024921	0.0310135	0.680533	0.00938781
OC90	1	-0.0020461	0.0406266	0.0266785	0.295913	0.0151365	0.368054	0.0162164	0.558388	0.0132378	0.682939	0.0109512	0.860148	-0.00676144	0.753523	0.00904954	0.420177	-0.0153604	0.812111	0.00706165
EFR3A	0.0779934	-0.0230216	1.63819e-12	0.0777929	0.00104953	0.0380415	0.00012623	0.0461234	1.95009e-09	0.0683402	0.162939	0.0223278	4.75764e-13	-0.0806653	0.104739	0.0245354	0.223489	0.0202151	0.624243	-0.0103532
TRAPPC2L	0.141057	0.0199514	0.613268	-0.00955652	0.142753	-0.0194867	1	-0.00321088	1	0.00036644	0.581212	0.0129077	0.939182	-0.00493463	0.926731	-0.00549019	1	-0.00294383	0.0114691	0.0321752
ACSF3	0.801819	0.00577298	0.717949	0.00761519	0.46596	0.0117281	0.696854	-0.0101391	0.878339	0.00723482	0.899805	0.00646414	1	-0.000994907	0.663158	0.0108055	0.273026	-0.0188377	0.292416	0.0167794
DDX19A	0.404269	0.0129702	0.197337	-0.0186724	0.00025863	0.0418759	0.145475	0.0221488	0.826282	0.00830272	0.183323	0.0216564	0.874333	-0.00643745	0.456646	-0.0147558	0.746301	0.0087961	0.0728645	-0.024597
GALNS	1	0.00208281	0.969068	0.00293752	0.283191	-0.0154326	1	-0.00038114	0.887614	-0.00707461	0.977959	-0.00443678	0.975824	-0.00405199	0.397213	-0.0159799	0.178494	-0.0216339	0.266856	0.0174126
GATA2	0.64247	0.008533	0.00451765	0.0347538	0.0343573	0.0261706	0.0267295	0.0298738	0.000337695	0.0442819	1.05078e-05	0.0526431	5.34374e-06	-0.0537701	0.112723	0.0241575	0.000942789	-0.041699	5.18958e-20	0.100002
C8G	1	-0.0010248	1	0.00230716	0.652024	-0.00855832	0.0832482	0.0249968	1	0.00359085	0.787657	-0.00890934	0.684431	-0.0102324	0.40352	-0.0158387	1	0.00246478	1	-0.00164652
ENTPD2	0.268817	-0.0159862	0.537858	0.0109516	1	-7.71124e-05	0.962431	0.00466635	1	0.00207088	0.822673	0.00818556	1	0.0032211	0.949872	-0.00486909	0.470982	-0.0142994	0.616997	-0.010482
RABL6	0.248987	0.0164924	0.215197	0.0181353	8.63791e-05	0.0446581	0.958854	0.00473448	1	-0.000223315	0.154156	-0.0226426	0.244506	-0.0195344	0.826317	-0.00762977	0.338147	0.0171957	0.868135	-0.00607201
PTGDS	0.000713856	-0.0397124	0.546161	-0.0107816	0.651857	-0.00856082	0.666022	0.0107123	0.881118	0.00718548	0.585911	0.0128199	0.0455364	-0.0283675	1	-0.0024855	0.0706646	0.0265816	0.904014	-0.00542116
EDF1	0.179811	-0.0185714	1.6397e-05	0.0497084	1.37409e-22	0.105008	0.401944	0.0155257	0.530214	0.013783	0.765818	0.00936812	0.867888	-0.00660446	0.996451	-0.00365587	0.0184308	0.0321907	0.000131812	0.045425
CLIC3	0.823651	-0.00539921	0.685574	0.00822379	0.776733	0.00644965	0.910048	0.00594071	0.980039	0.00480387	0.967937	0.00472425	0.895205	-0.00594352	1	0.000765095	0.957834	0.00420069	0.94577	-0.00447939
NPDC1	0.326142	-0.014635	0.00438911	-0.0348475	6.8328e-06	-0.0505461	0.380713	0.0159546	0.0204058	-0.0318058	0.299812	-0.018497	1	-0.00186794	0.0547011	-0.0276472	0.0103066	-0.0343072	0.21912	-0.0186647
FBXW5	0.111772	-0.0212102	0.946639	0.00338504	1	0.000144703	1	-0.00331936	0.858809	0.00765436	0.526999	-0.0139358	0.961301	0.00440758	0.164506	-0.0220602	0.572729	0.0122724	0.606341	-0.0106648
SLC25A13	3.79422e-09	-0.0653746	5.59855e-22	0.104123	0.00521307	0.0330972	0.39684	0.0156291	0.00181974	0.0396561	0.435413	-0.0156255	7.03717e-05	0.0480289	0.772127	0.00869979	0.672716	0.0103118	0.0490628	0.0264085
UBE2I	7.60875e-05	-0.0455635	9.09617e-12	0.0753284	3.41652e-30	0.121889	0.431484	0.0149389	1	0.00261931	0.000483043	0.0434933	1	-0.00112233	0.270733	-0.0189673	0.00200784	0.0395293	1	-0.00030873
TSR3	0.208794	-0.0176437	0.977813	0.00276831	0.0784982	0.0225085	0.0666294	0.0260444	1	0.00322417	0.253913	0.0196461	0.324228	0.0175331	1	-0.00233717	1	-0.000843883	0.0171458	-0.0306814
UNKL	0.061095	-0.0241803	0.0758526	-0.023862	0.74656	0.00698347	0.717377	-0.00977644	0.427452	0.0157606	0.88638	0.00683479	0.204381	-0.0206855	1	-0.000361592	0.874458	0.00615371	0.868841	0.0060532
LRRK1	1.74456e-05	-0.0490207	0.344314	-0.0148653	7.52763e-07	-0.055166	0.000483325	0.0426577	0.752725	0.00969936	0.15727	0.0225255	0.275573	-0.0187305	0.00891977	-0.0345878	0.569649	0.0123377	1	0.00169483
ALDH1A3	0.0179829	-0.0292761	0.288824	-0.016144	0.957379	0.00312695	1	0.00350977	0.86001	0.00763323	1	-0.00357645	1	-0.000788436	1	-0.00308915	0.626985	-0.0112208	0.803879	-0.00719204
ACTN1	0.0120512	-0.0307532	0.225874	0.0178227	1.65308e-37	-0.136118	2.62039e-10	0.0711222	0.000905708	0.0416408	0.934719	-0.00559205	8.67353e-10	-0.0695639	0.980751	-0.00409403	0.584641	0.0120318	0.000708398	-0.040944
SIRT2	0.199946	0.0179097	0.000760679	0.0401283	0.199817	-0.0176013	0.850688	0.00718855	0.548041	0.0134432	0.0299784	-0.0302969	0.0132126	0.0331439	1	-0.00350797	1	-0.00105005	0.53258	0.0119743
HNRNPL	0.689861	0.00767997	0.479768	-0.0120988	0.00570363	0.0327994	0.0535648	-0.0269993	0.374277	-0.0168519	1	-0.00191362	0.911545	-0.00556184	0.918872	0.00566549	0.434415	-0.0150206	0.799977	0.00725037
NOLC1	1	0.00105998	0.0821001	-0.0234855	2.6253e-113	0.235869	7.64957e-08	-0.0615633	0.0369735	-0.0294266	0.0463617	0.028498	0.709361	-0.00975069	0.986602	0.00391787	2.18696e-05	0.0510703	1.70695e-37	-0.137203
CASD1	0.90291	-0.00407746	0.000419923	0.0417611	1.97562e-10	-0.0697763	8.34334e-05	-0.0471182	0.0532366	-0.0279037	0.978248	0.00441074	0.141447	-0.0229092	0.927925	0.00541537	0.424392	-0.0152603	0.89311	0.00561104
CNKSR3	0.599441	-0.00927592	0.762467	0.00680278	0.15628	0.0189895	1	0.00214286	0.0363416	-0.0295043	0.170682	0.022058	0.672708	-0.0104413	0.726904	-0.00956078	0.579585	0.0121372	0.166406	-0.0202939
MTMR1	0.906753	0.00399947	0.102778	0.0223529	0.176	0.0183303	0.306344	-0.0175609	0.3718	0.0169005	0.340692	-0.0175603	0.000516179	0.0430263	0.369768	-0.0166139	0.957734	-0.00420763	0.114478	0.0223494
HMGB3	0.0552846	-0.0246517	2.31641e-16	0.0894734	1.01984e-38	0.138322	1	-0.00223863	0.917556	-0.00641925	0.234773	0.0201633	1	0.000289069	0.00268003	0.0385101	5.43929e-09	0.0669381	0.094421	0.0233427
MAP2	3.48055e-69	-0.185016	6.9223e-26	0.113172	0	-0.423568	1.45641e-19	0.0987811	1.6498e-19	0.0990563	3.25798e-06	0.055123	0.640726	-0.0110686	9.40582e-12	0.0766791	3.38617e-14	-0.0846505	4.00099e-17	0.0923305
CYP2J9	1	0.00130988	2.54543e-08	0.0625651	0.788767	-0.00625802	0.644884	0.0110748	0.778183	0.00922875	1	-0.00246913	0.643309	0.0110153	0.659285	0.0108764	0.419159	-0.0153762	0.507952	-0.0124177
ABCA1	1.37869e-06	0.0544326	1.23451e-10	-0.0714015	7.13839e-38	-0.13679	0.351683	0.0165783	4.54663e-09	0.0669585	0.00209557	-0.0393818	0.573963	-0.0123435	0.00662159	-0.0356107	0.0104437	-0.0342641	0.00509902	-0.0349522
NIPSNAP3B	0.000493847	-0.0407342	0.907058	-0.00414577	0.839772	-0.00536344	0.0438174	0.0278572	0.331717	0.0177508	0.000912283	0.0417698	1	0.00305286	0.373486	-0.0165248	0.919296	-0.00512893	0.890021	0.00567352
LAGE3	0.00160693	-0.0373504	1	-0.00101692	3.90794e-11	0.0722916	1	-0.003653	1	0.000643507	0.200602	0.0211316	0.715277	-0.00963831	0.752524	-0.00906911	0.232303	0.0199481	0.553491	0.0115851
UBL4A	9.33715e-08	-0.0596829	0.0797734	-0.0236224	0.00751434	0.0318659	0.000382044	0.043295	0.0229296	0.0313646	0.0136007	0.0333065	0.336729	-0.0172274	0.01476	0.0328084	0.871807	0.00620524	0.588513	-0.0109808
GDI1	1	0.0013401	0.482898	0.0120406	1.50236e-21	-0.10247	0.966542	-0.00456345	0.00162556	0.0399864	0.722097	0.0102355	0.155435	-0.0223797	1	0.00247144	0.0123915	-0.0336539	0.000380094	0.0426571
SASH1	1.39651e-07	0.0589256	6.19884e-116	0.238611	0.336552	-0.0142445	4.46719e-24	0.109738	2.81619e-20	0.101014	7.15824e-13	0.0804597	4.33598e-09	-0.0669368	0.00102469	0.0413756	1.13028e-06	0.0572451	0.000280895	0.0434551
GADD45B	0.0728794	0.0233595	0.526535	-0.0111814	0.234127	-0.01664	0.725427	0.00962492	0.403883	0.0162636	0.64534	-0.0116994	0.199309	-0.0208441	1	-0.00240379	0.765629	-0.00839986	1.95168e-16	0.0903782
SLAMF6	0.286203	-0.0155551	0.619175	-0.00944123	1	0.000328323	1	-0.00214066	1	-0.00136259	1	-0.000618585	1	-0.000639951	0.96944	0.00435561	0.626048	0.0112361	0.84466	-0.00649311
SLAMF1	1	0.00039987	0.0892215	0.0230617	0.343797	0.0140907	0.936861	0.00524302	0.954365	0.00550888	0.594546	-0.0126381	1	0.00155239	0.653883	-0.0109751	0.0897913	0.0254317	0.110574	-0.0225379
ZDHHC12	0.341446	0.0142893	1.1922e-05	0.0504181	1.319e-05	-0.0490827	0.312275	0.0174284	0.0870659	0.0256445	0.081203	-0.025964	0.607589	-0.0117088	1	0.00250112	1	-0.00129528	0.879629	-0.00585947
ENDOG	0.861135	0.00479179	0.000314221	0.0425359	0.000200435	0.0425419	0.0165862	0.0316598	0.947501	0.00570326	0.923975	-0.00587263	0.322357	0.0175812	0.743197	-0.0092453	0.25039	0.0194371	0.559941	0.0114756
CYBB	1	-0.000428159	0.17902	0.0192689	0.721082	0.00743463	0.631162	0.0113252	0.778495	0.00921572	0.925072	0.00584384	1	0.000397214	0.821614	0.00771925	0.564488	-0.012452	1	-0.00161704
GOLGA7	2.34756e-07	0.0579433	0.570982	-0.0103336	0.000697131	0.0391986	0.994304	0.00385649	1	-0.00168346	0.738813	0.00990696	0.938021	-0.00497468	0.503336	0.0138289	0.585343	-0.0120184	0.000106259	-0.0459657
XK	8.62403e-08	-0.0598294	0.146948	-0.0204222	0.735608	-0.00718234	0.969995	0.00447922	0.095262	-0.0251978	0.396188	-0.0163813	1	-0.00221432	1	-0.00183017	0.881465	-0.00601116	0.809733	-0.00710244
PCOLCE2	1.39448e-22	-0.105252	0.194822	0.0187507	0.0203044	0.0282677	0.890111	-0.0063586	0.571168	-0.013011	0.213582	0.0207404	0.740194	-0.00915505	1	-0.00115879	0.000223863	0.0455477	3.61694e-09	-0.0666283
CLPX	7.39337e-06	-0.0509199	1	-0.00179024	0.0149925	0.0294062	1	-0.000713786	0.877799	0.00724615	1	-0.00022884	1	-0.000464414	0.396101	-0.0160056	0.861191	-0.00642942	0.28183	0.0170391
TRABD	0.890631	0.00428858	0.0292706	0.0280491	0.0593394	0.0238086	0.752617	-0.00914124	0.285167	-0.0188188	1	-0.00318142	1	0.00215245	0.357035	-0.0168908	0.970496	0.00385724	0.930314	0.00482597
MOV10L1	0.914579	0.00386476	1	-0.00185001	1	-0.000630457	0.636361	-0.0112447	0.76394	-0.00946416	0.995804	-0.00394783	0.772943	-0.00847151	0.83763	0.007412	0.655822	-0.010668	1	0.00118075
DENND6B	1.13175e-05	-0.0499855	0.635663	-0.00913938	0.922025	0.00384469	0.974258	-0.00436935	0.951158	0.00560822	0.92377	-0.00587656	1	-0.002327	0.463464	0.014623	1	0.000231112	0.00213053	-0.0377093
CD83	0.97665	-0.00276589	0.836069	0.00546439	1	-0.00193435	0.332144	0.0169902	0.371709	-0.0169045	0.335948	-0.0176775	0.0840911	0.0255889	0.806581	0.00800948	1	-0.00105424	1	-0.000221361
TMEM27	0.810887	-0.00562052	0.00862918	-0.0325957	0.295332	0.0151504	2.04457e-08	0.0639253	0.0259033	-0.0308921	1	0.00256356	0.0453533	-0.0283858	0.920137	-0.00563401	0.867947	0.00628626	0.333629	-0.0158516
ACE2	0.444389	0.0121522	1	-0.00118864	1	-0.00135848	0.313027	-0.0174115	0.545448	-0.0134873	0.96462	-0.00482734	0.318425	-0.0176744	0.537109	0.0131706	0.742174	-0.00889516	1	0.00309608
GZMN	0.521416	0.010687	5.90016e-05	0.046743	0.253309	0.016153	0.729683	0.0095396	0.9474	0.00571347	0.550374	-0.0134944	0.0275225	0.0304434	0.564681	-0.0126476	1	-0.00309105	0.736455	-0.00837886
AGER	0.564966	-0.00988954	0.501478	-0.0116693	0.0714784	-0.0229507	1	0.00338998	0.21885	-0.0205915	1	-0.00383322	1	-0.00185267	1	-0.00135667	1	-0.000400383	0.0715256	0.0246859
ATF6B	0.98166	0.00266836	1	-0.00221059	0.0446275	0.0250724	0.355113	0.0164981	0.59801	0.0125162	0.915721	0.00611197	0.799214	-0.00797809	0.87612	-0.00660587	0.380893	0.0162115	0.263643	0.0174987
EGFL8	1	-0.000643208	0.0102458	-0.031994	0.963208	-0.00301381	0.614915	-0.0116051	1	8.17928e-05	0.680432	-0.0110028	1	0.000548346	0.514587	0.0135939	0.948072	0.00445225	0.112431	0.0224466
NOTCH4	1.68938e-09	-0.0667307	0.000923776	0.0395827	0.457766	-0.0118766	0.965138	0.00459957	0.684158	0.0109982	0.499065	0.0144526	0.0967773	-0.0248803	0.384119	0.0162762	0.013125	0.0334402	1	-0.00164756
PPT2	9.01843e-09	-0.0638832	0.665702	-0.00859344	5.12664e-10	-0.0682489	0.0835249	0.0249822	0.337796	-0.0176241	1	-0.00200159	0.603907	0.011779	0.0794013	-0.0259314	0.0613153	-0.0272379	0.00207519	0.0377928
PRRT1	0.100554	0.0217577	0.0991151	-0.0225407	0.301719	0.0150016	2.33398e-06	0.0549718	0.00634676	0.0358713	0.0504917	-0.0281355	0.819791	-0.00754614	0.960545	0.00457259	0.595075	0.0118408	2.08837e-05	0.0498547
RNF5	0.000109626	-0.0446631	4.74482e-06	0.0524142	2.4972e-15	-0.0857603	0.637191	0.0112318	0.0488054	0.02828	0.966087	0.00479482	0.044463	-0.0284707	0.884124	0.00645002	0.584641	-0.0120317	0.00462552	0.0352711
FAM163A	0.0152425	-0.0299045	0.0774714	0.0237627	2.41471e-09	-0.0656821	0.0755182	0.0254669	0.124412	0.0238228	0.00859032	0.0349287	4.71843e-10	-0.0705266	0.0522778	-0.0278353	0.82388	-0.00722634	0.151499	0.0208456
CACFD1	0.19275	-0.0181386	0.00664703	-0.0334766	1.25866e-13	-0.0805643	0.249424	0.0189559	0.981386	0.00476151	1	0.00267997	0.0338112	-0.029631	1	-0.00178618	0.72519	0.00927846	0.726344	0.00854927
HIVEP2	3.00935e-48	0.154621	7.00162e-36	-0.133483	1.08039e-06	-0.0544386	1.80369e-13	-0.0816805	0.000903611	0.0416495	1.04737e-14	-0.0861575	0.0905588	-0.0252193	0.0452509	0.0284543	1.15054e-16	-0.0918246	6.60414e-10	-0.06944
ARNT	0.918535	0.00380189	0.919628	-0.00391663	0.414118	-0.012688	1	-0.00335217	0.968496	-0.00509738	0.685089	-0.0108873	0.468457	-0.014441	0.993833	-0.00373684	0.87216	-0.00619552	0.149161	0.0209339
ITGA2	0.406575	0.0129145	0.601224	-0.00978676	0.000241371	-0.0420573	0.589064	0.0120589	0.888994	-0.00705361	0.923253	0.00591061	1	0.00303612	0.905449	-0.00597009	1	-0.00175998	0.188403	0.0195628
MOCS2	1.01118e-08	0.0636819	6.86113e-05	-0.0463796	0.410066	0.0127689	0.051387	-0.0271832	0.246407	-0.0198122	1	-0.00165724	0.0106173	-0.0339166	0.012955	0.0332665	0.888299	0.0058226	0.621085	0.0104095
NAT9	0.819946	0.00547272	3.50893e-07	0.057683	1	0.00166297	0.139965	0.0223668	6.58769e-06	0.0534269	0.135307	-0.0233606	0.161643	0.0221545	0.795697	0.00823348	0.958757	0.00417067	0.23534	-0.0182244
LPL	3.34251e-06	-0.0526098	7.3001e-06	-0.0514857	0.0377425	0.0257739	1.42869e-07	-0.0604185	0.000345586	-0.0442138	1	-0.00163001	0.746258	0.00904573	0.606161	0.0118682	5.26187e-07	0.0587304	0.00018195	-0.0445967
ATP6V0E	9.72178e-06	0.0503179	0.00135333	-0.0384767	3.37852e-25	-0.111116	0.0479283	0.0274825	0.0942814	0.0252519	0.178236	0.0218242	0.0204676	-0.0315581	0.0345352	0.0295923	0.076723	-0.0261723	1.7446e-09	0.0678407
NKX2-5	0.758384	0.00651051	0.847922	0.0052397	0.113387	0.0206979	0.669466	-0.0106538	0.897524	0.00687987	0.911622	0.00619023	0.614042	0.0115751	0.746325	-0.00918298	0.775691	0.00820052	0.334711	0.0158259
ZFP318	0.000237574	0.0426894	0.0191572	-0.0297029	0.0942937	0.0216291	0.899934	-0.00613157	1	0.00263381	0.835523	-0.00792119	0.324432	-0.0175252	1	-0.000328182	0.72985	0.00917903	0.0450122	0.0267813
TTBK1	3.96069e-29	-0.119884	0.0083448	-0.032707	0.271587	-0.015706	0.950112	-0.00493481	1	-0.0015613	0.775616	0.00916426	0.00578764	-0.0359026	0.261417	0.0191902	0.09394	0.0252008	1	0.000583292
SRF	0.0158859	0.0297477	0.757268	-0.00690206	0.00772346	0.0317723	0.00117468	0.0401894	0.00325135	0.037932	0.03903	0.0292227	0.349617	0.0169259	0.0526934	-0.0277987	0.388881	0.0160268	6.87476e-10	0.0693738
GATA3	0.000219283	0.0428992	0.716372	-0.00765141	0.914971	-0.00396503	0.336566	0.0168849	4.4669e-08	0.0630406	0.435217	-0.0156304	0.278429	-0.0186456	0.453546	-0.0148097	0.246689	-0.0195392	0.390968	0.0146207
GATA5	0.706232	0.00740311	1	0.00143395	0.0301561	-0.0267055	0.5036	0.0135515	0.784623	-0.0091027	0.895412	-0.00656271	0.550531	-0.012781	0.271563	-0.0189446	0.821711	-0.00729124	1	0.000714118
LAMA5	4.63741e-07	-0.0566236	0.42653	-0.0131314	0.320053	-0.0145982	0.0925966	0.024504	0.488048	0.0145966	0.364074	0.0170558	0.645271	-0.0109686	0.0766633	-0.0261004	0.0293957	-0.0303773	4.7512e-18	0.0948515
STEAP1	1.39634e-08	-0.0631161	0.0691884	-0.0242981	0.110722	0.0208206	0.627379	0.0113965	0.790735	-0.00899482	0.97229	0.00458034	0.169451	-0.0218788	0.00754229	-0.0351845	0.339864	0.0171551	0.0792995	-0.0242017
STEAP2	0.0730177	-0.0233495	0.453363	-0.0126071	0.459331	-0.011842	0.150763	0.0219453	0.973085	-0.00495961	0.134772	-0.0233807	0.505415	0.0136739	0.87612	-0.00660633	0.84817	0.00670557	0.196622	-0.0193176
HSPA8	0.0131018	0.030455	1.45646e-10	0.0711475	3.97394e-15	0.0851631	0.445958	0.0146365	0.740447	0.00996613	6.14061e-08	0.0627777	0.000157745	0.0460866	0.645113	-0.0111513	1	-0.00057832	4.74716e-09	-0.0661651
SERAC1	0.817025	0.00552487	0.621797	-0.00939145	0.842214	-0.00531535	0.639928	-0.0111756	1	-0.000844494	1	0.00380022	1	-0.000157743	0.929747	0.00535295	1	0.0020876	0.651945	-0.0098846
AWAT1	1	-0.000595175	0.636575	0.00911777	0.837734	0.00539518	0.899225	0.00614322	0.965153	0.00516662	0.963994	0.00484707	1	-0.00302429	0.948793	0.00490105	0.742174	-0.00889643	0.925254	0.0049297
PDZD11	0.271194	0.0159307	0.0125897	0.0312639	0.0749365	0.0227277	1	0.00119813	0.734408	0.0100928	0.615875	0.0122513	0.343082	0.0170827	0.269591	-0.0189924	0.121291	-0.0238514	0.00729208	0.0337635
PSMA2	0.0019009	-0.0368414	0.0216413	-0.0292312	1.5821e-16	0.0892141	0.500267	0.0136095	0.669994	-0.011237	0.00289673	0.0384114	0.651694	-0.0108622	1	-0.00144911	0.252962	0.0193716	0.935931	0.00470397
MRPL32	0.0411505	-0.0259403	0.573661	-0.0102778	3.53873e-22	0.104012	0.933229	-0.00534083	0.892245	0.00699647	2.16118e-07	0.0604525	0.394009	-0.0159515	0.645413	-0.0111441	0.933611	-0.00481266	0.56326	0.0114175
SETDB1	0.0224351	0.0284139	0.136392	-0.0208396	0.0112342	0.0304586	0.621298	-0.0115001	0.55717	0.0132656	0.162655	-0.0223375	1	0.000347542	0.105085	-0.0245156	1	0.00151784	0.00713659	-0.0338416
ANXA9	1	-0.000549187	0.953549	-0.00324062	0.699975	-0.00777772	0.988052	0.0039976	1	-0.00237978	0.834334	0.0079458	0.144729	0.022781	0.967248	0.00440265	0.861783	0.0064182	1	-0.00160682
ARNT2	0.456118	0.0119153	0.0383357	-0.0269213	1	-0.000130622	0.768637	0.00882328	0.00080041	-0.0419815	0.0662823	0.0269239	1	0.00135093	0.770859	-0.00872587	0.596208	-0.0118225	1	-0.00214603
PRUNE1	0.149699	0.0196367	0.481488	0.0120664	0.461995	-0.0117978	1	0.00254651	0.456582	0.0151742	0.883086	0.00690494	1	0.00159881	0.478722	0.0143063	0.763502	-0.00843773	0.178538	0.0198902
CERS2	0.00943056	0.0316342	0.149533	0.0203199	0.157356	0.0189525	1	-0.00185704	1	0.00119986	0.017651	0.0323269	1	-0.0030575	0.283392	0.0186475	0.731742	-0.00912118	1	0.000795495
NLRP5	0.853316	0.00492088	0.934057	0.00364145	0.000467115	-0.0402973	0.98341	-0.00412536	1	-0.00213854	1	0.000812717	0.574013	-0.0123423	0.948595	0.00490887	1	-0.00209208	0.837524	0.00663233
CAPZA2	0.0283889	0.027489	0.162234	-0.0198484	1	-0.00199118	0.342637	0.0167568	0.1216	-0.023945	0.346653	0.0174317	0.625884	0.0113161	0.438044	-0.015117	0.304882	-0.0180211	0.071771	0.0246697
PLEKHO1	5.00036e-07	-0.0564691	0.000192078	0.0438175	0.00772485	-0.0317703	0.333689	0.0169514	0.305649	0.0183461	0.00377317	0.0376059	0.258465	0.0191566	0.0290917	0.0302828	0.000582664	0.043034	9.15889e-08	0.0609355
VPS45	0.512142	0.010845	0.102488	0.0223697	0.908117	-0.00412107	0.8443	0.00734774	0.148058	0.0228766	1	0.00376016	0.00927811	0.0343742	1	0.000213606	1	3.62103e-05	0.085001	0.0238562
PRPF3	0.0188933	-0.0290863	0.76724	-0.00671853	5.51548e-06	0.051009	0.874492	-0.00666086	1	-0.002574	1	-0.00179622	1	-0.000126592	0.876291	0.00660318	0.151082	0.0226474	0.000205197	-0.0442795
ANP32E	2.04857e-05	0.0486572	0.691995	-0.00811054	1.82776e-34	0.130392	0.253726	-0.0188349	0.259521	0.0194596	0.303175	0.0184241	0.581051	-0.0122101	0.0448819	0.0284859	0.945782	-0.00450935	0.0256502	-0.0291368
APH1A	8.31482e-08	0.0598988	0.4262	0.0131415	0.0554264	-0.0241164	1	0.000722794	0.883293	-0.00714686	0.922078	0.00593917	0.0449328	-0.0284246	0.179043	-0.0215682	0.751834	0.00866973	0.691423	-0.00917816
TAB2	0.32861	0.0145766	0.106812	-0.022141	0.632355	-0.00887571	0.0158389	-0.0318344	0.0926806	-0.025337	0.994868	0.00398599	0.745524	-0.00905628	0.641167	0.0112161	0.853409	-0.00659686	2.38611e-12	0.0779648
PPIL4	0.455678	-0.0119232	0.250263	0.017137	3.51329e-06	0.0519773	1	-0.00123121	0.997056	-0.00431046	0.540914	0.0136775	0.648816	-0.0109136	0.962371	-0.00452703	0.451353	0.0146828	0.764993	0.00785921
CNIH1	0.0537128	0.0247792	0.0334414	-0.0274928	0.123855	0.0202394	0.770766	0.0087813	0.699048	-0.0107239	0.125271	0.0237893	0.917686	0.00543542	0.354035	0.0169698	1	-0.000226989	0.160939	-0.020493
EPS8	9.3024e-38	0.136712	1.8734e-90	0.21134	6.08343e-05	0.0455111	3.00034e-07	-0.0590147	5.60479e-12	-0.0773281	3.52931e-14	-0.0845714	2.20513e-10	0.0717275	0.48828	-0.0141313	6.58722e-25	0.112407	0.841263	0.00654675
MED22	0.0776343	-0.0230438	0.13363	0.0209456	0.0740953	0.0227802	0.795967	0.00832354	0.0400341	0.0290974	0.0159489	0.032728	0.0331193	0.0297232	0.179043	0.0215682	0.6698	-0.0103881	0.100415	-0.0230368
SURF1	0.000186535	-0.0433106	0.0711784	-0.0241603	0.440087	-0.0121998	0.0885685	0.0247163	0.474351	0.0148517	0.217323	0.0206385	0.253606	-0.0192784	0.698481	-0.0100962	0.747182	-0.00877156	0.0306648	0.0283939
MED28	0.000225374	0.0428304	0.3036	0.0157936	0.428775	0.0124081	0.83955	0.00745087	0.795211	0.00891063	0.826533	0.00810943	0.0891902	0.0252944	0.507228	0.0137509	0.0747899	0.0263027	1	-0.00180123
QDPR	0.649144	-0.0084049	0.28085	0.0163338	3.26009e-23	0.1065	0.369397	0.0161922	0.0451348	-0.02861	0.000282023	0.0448983	0.28278	-0.0185464	0.0746505	-0.0262292	2.03084e-05	0.0512364	0.000785179	-0.0406563
GNRH1	1	-0.00183266	1	0.00164741	0.426008	0.012459	0.534241	-0.0129983	0.95771	-0.00540255	1	0.0036818	0.878298	-0.00634813	0.847468	0.00719678	0.674384	-0.0102789	0.978861	0.00369939
TNR	0.000695059	-0.0397869	0.000751685	-0.0401653	0.569459	-0.00994404	0.00190965	-0.0387884	0.034159	-0.0297595	0.0898803	-0.0254715	0.141495	0.022906	1.31491e-05	0.052066	7.21899e-07	-0.0581202	0.266648	0.0174191
SQSTM1	0.150857	-0.0195895	0.775457	0.00657037	4.50148e-14	-0.0819669	0.00376772	0.0367019	9.75005e-06	0.0525975	0.959571	-0.00497495	0.0129362	-0.0332226	0.472209	0.0144336	0.874293	-0.0061566	8.06661e-06	0.0519807
NFE2L2	3.1334e-25	-0.111406	0.0437558	-0.0263507	1	0.00047223	0.000961984	-0.0407536	0.204023	-0.0210276	0.0780975	-0.0261525	3.99033e-11	-0.074333	0.00836394	0.034824	0.248578	0.019485	1	-0.00235242
RXRG	3.32884e-14	0.0827496	1.95133e-07	0.0588069	2.67724e-05	0.0474666	0.00150785	-0.0394777	0.0985029	-0.0250435	0.00914157	0.0347095	0.548405	-0.0128181	1	-0.000988226	0.620962	0.0113344	1.04637e-18	0.0966181
RXRA	2.73636e-55	0.165503	1	0.000456129	0.0697673	-0.0230631	0.502567	-0.0135707	0.0532398	-0.0279024	0.130851	0.0235444	0.00209631	0.039098	0.0427209	-0.0287035	1	0.00154101	0.000228059	-0.0440027
ADAMTSL4	1	-0.00160821	0.468833	-0.0123156	0.0204753	-0.0282356	1	-0.00359123	0.88901	-0.00705279	1	-0.00296599	1	0.00195953	1	-0.000880599	0.874237	0.00615805	0.632625	0.0101992
CD5L	1		1		1		1		1		1		1		1		1		1
PRPSAP1	0.215753	-0.0174246	1.12358e-12	0.078326	4.76603e-06	0.051325	0.02743	0.0297772	0.516555	0.0140507	1	0.00333416	1	-0.00029785	0.935511	0.00521054	0.00932817	0.0346643	0.799731	-0.00725534
FAM184B	0.443913	-0.0121643	0.541649	-0.0108757	0.333907	0.0143017	0.944535	0.00509431	0.846978	-0.00785391	0.384614	-0.0166114	0.428058	0.0152277	0.323547	0.0176679	0.957834	0.00420357	7.20143e-05	-0.0469204
NCAPG	0.830517	-0.00530031	1	0.000769406	7.14444e-23	0.10569	0.0319222	-0.0291815	0.357629	-0.0171932	1	-0.000488948	0.0924027	0.0251131	0.970578	-0.00431797	1	-2.07077e-05	0.34364	-0.0156308
LCORL	0.726609	0.0070691	0.156313	0.0200701	2.326e-16	-0.0887412	0.646574	-0.0110473	0.84156	-0.00796871	0.0373121	-0.0294062	0.00401023	0.0370905	0.923366	-0.00556806	0.0747899	-0.0263029	0.939732	-0.00460655
LTA4H	0.361396	0.0138557	0.951253	0.00328553	0.441597	0.0121708	0.00246379	0.0380277	1	-0.00175445	0.805539	-0.00853449	0.34663	0.0169902	0.0675461	-0.0267088	0.315425	0.0177305	0.00639781	0.0342007
AMDHD1	0.0205717	0.0287596	0.730567	0.00740036	0.970425	0.00286441	0.146378	0.0221185	0.398785	-0.0163556	0.37936	-0.0167451	0.688434	0.0101558	0.0428316	-0.0286913	0.807162	0.00759195	0.674976	0.0094942
DSTN	2.91016e-06	0.0529006	1.01297e-10	0.0717107	0.35159	-0.0139248	0.609781	0.0116994	1	0.00010829	0.222099	-0.0205	0.000201347	0.0454806	0.769301	0.00874804	5.64788e-06	-0.0539747	7.90102e-14	0.0826825
H2AFY	2.21693e-30	-0.122467	0.610009	-0.00962237	3.63093e-95	0.21656	0.311822	-0.0174417	0.64252	0.0117125	0.000196858	-0.0458181	0.093172	-0.0250687	0.0027906	-0.0383755	2.15126e-07	-0.0604382	2.01244e-16	0.0903398
GTF2IRD2	0.742619	0.00678801	0.541918	-0.0108679	0.660307	-0.0084302	0.912119	0.00589051	0.885887	0.0071022	0.152324	-0.0227183	1	-0.0028708	0.16431	0.0220673	1	-0.00244141	0.628761	0.0102559
BOLA1	0.419292	0.0126614	0.00201949	0.0372994	3.452e-45	0.149532	1	0.00302615	0.101869	-0.0248818	0.283245	0.0188909	0.198798	0.0208598	0.398415	-0.0159484	0.0605155	0.0273014	0.0390292	-0.027398
GATSL2	3.13496e-08	-0.0616763	0.000883641	-0.0397103	1.0838e-11	-0.074221	0.0178166	-0.0314004	0.0959888	-0.0251645	0.00603687	-0.0361117	0.13668	0.023106	0.194541	0.0210697	1.90647e-08	-0.0648049	0.00532204	0.0348049
FCGR1	0.199349	0.0179302	0.181101	-0.0191978	1	0.0019073	0.997464	-0.00375257	0.00646605	0.0358062	0.589091	-0.0127543	0.988903	-0.0036841	1	-0.000384404	0.849813	-0.00666526	0.282217	-0.0170264
NCF1	0.599318	0.00927971	0.159809	0.0199389	0.474387	0.0115817	0.936586	-0.00524934	1	0.00402904	0.738024	0.00992967	0.54583	-0.0128701	0.361669	0.0167974	1	0.00242456	1	0.000160204
WNT11	0.143569	0.0198537	0.664423	-0.00861871	0.635712	0.00881939	0.953278	-0.00485276	1	0.00267123	0.764822	-0.00939346	0.682581	0.0102703	0.872523	-0.00668666	0.0127927	0.0335384	0.0112572	0.0322429
ADSS	2.37844e-06	0.0533155	0.872768	-0.00479002	1.69161e-09	0.066282	9.39453e-14	-0.0825676	0.00440035	-0.0370171	1	0.000607202	0.354157	0.0168166	0.144296	-0.0228075	1	-4.837e-05	0.000846797	-0.0404406
IL17RB	0.675582	0.00792606	0.408983	0.0134846	0.88143	0.00460551	0.776951	-0.00867173	0.850535	-0.00779555	0.695195	-0.0107056	0.983502	0.00387852	0.913729	-0.005796	0.566814	0.0124041	0.868174	-0.00606515
CACNA1D	6.52067e-15	-0.0848833	0.720303	-0.00757794	9.95215e-05	-0.044307	0.974105	0.00437757	1	0.0036696	1	-0.000385599	0.206152	0.0206262	0.845626	-0.0072497	0.152258	-0.0225991	1	0.000941728
CHDH	0.223974	-0.0171848	0.359049	0.0145301	0.577078	0.00980936	0.482178	0.0139525	0.631153	0.0118935	0.468825	0.0150171	0.186223	-0.0212939	0.91196	0.00582703	1	-0.0001805	1	-0.00129686
ACTR8	0.379401	-0.0134852	0.828687	0.00560118	0.120462	0.0203833	0.500267	0.0136089	0.346254	0.0174596	0.636438	0.0118826	0.870848	0.00652512	1	-0.0015752	0.830778	0.0071034	0.899813	-0.00549826
LRRC27	0.402934	0.0129946	0.181656	0.0191767	0.175548	-0.0183433	0.0573889	0.0267064	1	-0.00243129	1	-0.000624336	1	8.05627e-05	0.507228	-0.0137531	1	0.00144757	1	0.000252842
STK32C	0.00181653	0.0369754	4.81328e-27	-0.115706	0.00663251	0.0322933	1.44978e-10	0.0720446	0.0017451	-0.0397692	0.00917872	0.0346936	0.541094	0.0129662	1	-0.00118876	2.50535e-06	-0.0556439	0.143389	-0.0211461
FNTA	0.00597763	-0.0332051	0.65745	0.00873547	0.00102691	-0.038104	0.013499	0.0324392	0.11162	0.0243987	0.477127	-0.014863	0.000869106	0.0416143	0.127322	-0.0235258	0.181661	-0.0215171	0.460786	-0.0132895
SKIV2L2	0.0604113	0.024238	0.252683	-0.0170717	3.16219e-11	0.0726135	1	0.00349627	1	0.00178611	0.785483	0.00896691	1	0.00112314	0.985474	0.00394024	0.413591	0.0154941	0.0533079	-0.0260477
LBP	0.000653439	-0.0399605	0.76178	0.00681941	0.0614947	-0.0236456	1	-0.000999356	1	-0.00249892	0.165605	-0.0222342	0.249427	0.0193962	0.185788	-0.0213423	0.0560349	-0.0276418	0.153285	0.0207773
CELSR1	8.8541e-259	0.350343	8.61386e-59	0.170822	1.66571e-06	-0.0535491	1	0.00185433	0.686869	-0.0109556	1.2768e-14	-0.0858982	1	0.00202903	2.7961e-05	-0.050393	0.199604	0.0209294	0.122674	-0.0219903
FLI1	0.916956	0.00382511	0.717949	-0.00761525	0.676448	-0.00815963	0.918316	0.00572542	1	0.00407645	1	-0.00377477	0.156941	0.0223226	0.897101	0.00616615	0.862688	0.0063948	0.901379	0.0054708
STARD13	0.985483	0.00259789	0.741228	-0.00721198	0.274416	0.015639	0.0645731	-0.0261823	0.748027	-0.00980625	0.239589	0.0200347	0.0867971	0.0254278	0.951235	-0.00481061	0.570785	-0.0123155	0.0774489	0.0243204
TENM1	4.18082e-12	-0.0760364	1.55159e-07	-0.0592456	0.284365	-0.0154049	0.388673	0.0157924	0.0106907	-0.0341318	0.624662	-0.0120718	0.992778	0.00358287	8.17496e-18	-0.0947988	0.000134959	-0.0467923	0.000868145	0.0403672
CAMK1G	5.83896e-05	-0.0462014	3.31495e-06	0.0531745	1.02027e-49	-0.156885	0.119381	0.0231912	0.053002	0.0279237	1	0.0035739	1	-0.00242008	0.832412	0.00753005	0.0165606	0.0325761	0.918772	0.00507945
DIEXF	1	-0.00102672	0.320943	0.0153993	2.19409e-07	0.0575845	0.126089	-0.0229084	0.361536	0.0171065	1	0.00161743	0.164921	-0.0220398	0.689002	-0.0103022	0.904751	0.00545785	0.0101569	-0.0326069
HSD11B1	0.484122	-0.0113676	0.852535	-0.00516649	1	0.00168056	1	0.00069533	1	0.000614112	0.974194	0.00451381	0.664407	-0.0106041	0.934545	0.00523092	0.177537	0.0216643	0.654345	-0.0098395
SYT14	7.14192e-08	-0.0601817	0.00120495	-0.0388159	0.661274	-0.00841156	0.469787	0.0141865	1	-0.00223783	0.992793	0.00402962	0.0242063	-0.0309376	0.941391	-0.00506038	0.355397	-0.0167985	1	-0.0016325
H2-M3	0.121773	-0.0207636	0.0306357	0.0278582	0.00551996	0.0329101	1	0.00320071	1	0.00393637	0.755395	0.00959901	0.800409	0.00795412	0.40738	-0.0157653	0.904117	0.00547017	1	0.00188319
LONRF3	0.968075	0.00292024	0.0286806	-0.0281288	1	0.000574452	0.121427	0.0230983	1	-0.00302773	0.0363165	-0.029522	0.34886	-0.0169427	0.399331	-0.0159292	0.651117	0.0107705	1	-0.00290842
ATP5E	6.03953e-08	0.0604889	0.69496	0.00805749	0.800283	0.00605727	1	0.00207848	0.88939	0.00704589	0.00852016	-0.0349566	0.579783	0.0122396	0.0463852	-0.0283497	0.923989	-0.00502256	0.00133676	0.0391051
NELFCD	0.0145899	-0.0300644	0.841765	0.00535283	3.33752e-05	-0.0469491	0.000616222	0.041999	0.264832	0.0193263	0.0901986	-0.0254461	0.521911	0.0133333	0.758638	-0.00895661	1	0.00133572	0.0373862	0.0275702
TUBB1	0.597097	0.00931785	0.749924	-0.00703737	0.589852	-0.00958732	1	0.00216177	0.773433	-0.00930918	0.142029	0.023106	0.648253	-0.0109221	0.438044	-0.0151134	0.0211882	-0.0316569	0.847434	0.00644106
CTSZ	8.43012e-33	-0.127324	0.445483	0.0127612	3.98626e-39	-0.139055	3.01976e-07	0.0590017	0.358584	0.017169	0.00485003	0.0368248	0.0433042	-0.0285783	0.0441603	-0.0285555	0.263388	0.0190775	0.0323593	0.0281787
SLMO2	0.0687622	-0.0236349	0.860208	0.00501645	1.5078e-06	0.053754	0.100179	0.0240886	0.751084	0.00973171	4.51653e-06	0.0544471	0.933686	-0.00508567	0.1681	0.0219399	0.129325	0.0235195	0.363893	0.0151897
SERTAD4	5.09104e-09	-0.0648773	2.08379e-20	-0.100258	0.0655193	0.0233506	2.12405e-07	-0.0596651	0.932752	-0.0060356	3.10292e-10	-0.0715875	0.115335	0.0240134	7.29076e-09	-0.0662854	1.56867e-19	-0.099498	0.0565724	0.0257807
H2-M2	1		1		1		1		1		1		1		1		1		1
UBE2A	0.313368	0.0149215	0.0340725	0.0274115	1.05175e-12	0.0776018	0.642602	0.0111175	0.0739447	-0.0264095	0.827765	0.00808637	0.965915	0.00429931	0.550734	-0.0129035	0.358071	0.016739	1.55089e-09	0.068044
SLC25A5	7.95215e-24	0.108183	0.232362	-0.0176341	3.15791e-106	0.228543	2.84369e-30	-0.123106	4.13693e-18	-0.0954126	5.97729e-13	-0.0807089	2.51292e-44	0.149209	9.09316e-05	0.047669	1	-0.00078734	2.74404e-09	-0.067094
ATP1B4	1		1		1		1		1		1		1		1		1		1
PPDPF	3.40699e-21	-0.101876	0.000112543	-0.0451617	0.0001032	-0.0442192	0.0473863	0.0275285	0.720383	0.0103296	1	-0.00248123	0.312447	-0.0178072	0.29814	-0.0182758	0.0908808	0.0253714	0.750684	-0.00811874
KCNQ2	8.76265e-14	-0.0814467	0.0151617	-0.0305845	0.263435	0.0159051	1	0.00300416	0.842927	0.00793831	0.2467	0.0198335	0.070405	-0.026423	0.865366	-0.00684173	0.9415	0.00460613	1	0.00187498
EEF1A2	1.67689e-05	-0.0491085	0.543251	-0.0108407	0.7457	-0.00700147	1	0.000100201	1	0.000604254	0.938182	-0.00549416	0.733992	0.00928456	1	-0.00231293	1	0.00284179	0.904097	-0.00541601
COL20A1	0.19363	0.0181095	0.0890668	-0.0230711	0.0931303	-0.0216908	1	0.00226796	0.931562	-0.00607388	0.0594481	0.0274103	0.608082	0.0116975	0.170987	-0.0218263	0.255965	-0.0192868	0.948908	-0.00442737
PLS3	2.43256e-234	-0.334369	3.51511e-115	-0.237855	1.71149e-13	0.0801412	7.23587e-41	0.143036	0.0604486	-0.0273414	8.04874e-20	0.100174	0.000803688	-0.0418265	0.605102	0.0118889	0.289167	-0.0184121	0.939784	0.00459976
MPPED2	1.09456e-67	-0.183016	6.78542e-12	-0.0757552	9.53486e-07	0.0546882	0.0303549	0.0293844	0.000194013	0.045694	0.332806	-0.0177444	0.0586583	0.0272555	0.000963974	0.0415587	0.548258	-0.0127625	2.03348e-11	0.0748409
NKAP	0.0107825	-0.0311608	0.00088767	-0.0396978	4.44805e-07	0.0562141	0.941803	-0.00515067	1	0.00158626	0.0303983	0.0302345	0.175381	-0.0216663	0.052642	-0.0278043	0.194227	0.0210892	0.0327013	-0.0281364
NDUFA1	0.000559691	-0.040396	1.37391e-05	-0.05011	2.07061e-10	0.0697027	0.974258	-0.00436965	0.687028	-0.0109436	0.820837	-0.00823053	1	-0.00222045	0.289862	-0.0184771	0.000289865	0.0448839	0.000153321	-0.0450393
WT1	1	0.0011382	0.515452	0.0113948	1.43537e-19	-0.0974672	0.0923891	0.0245223	0.862406	0.00757145	0.983208	0.00425552	0.166584	-0.0219787	1.20853e-05	-0.0522534	0.10018	-0.0248739	0.0935602	0.0233883
E2F3	0.00894331	-0.0318228	0.0195814	-0.0296225	9.04893e-07	0.0547951	0.0757487	-0.0254492	0.0761598	-0.0262769	0.0445126	-0.028684	1	0.000805619	1	-0.00132858	0.178224	0.0216441	0.00406498	-0.0356876
CR1L	9.7334e-05	0.0449631	0.805095	0.00603769	1	0.000422432	0.767167	-0.00884645	0.398409	-0.016369	0.345417	-0.0174593	1	-0.00151441	0.173664	-0.0217483	1	0.000420781	0.0438304	0.0268966
PPFIBP1	1.29424e-05	0.0496883	0.762171	-0.00681001	0.10456	0.0211118	0.494319	-0.0137284	0.616447	0.0121742	8.93794e-10	-0.0698971	4.28206e-05	0.0492044	4.62238e-07	-0.0588383	0.107409	0.0244933	0.997342	0.00327225
CD46	0.301636	0.0151899	0.601591	-0.00977078	1	0.00154803	0.84825	0.00724847	0.848104	-0.0078343	0.313971	-0.0181885	0.976817	0.00402824	0.969395	-0.00435921	0.70521	-0.00967763	0.345726	0.0155834
CD34	2.42089e-07	-0.0578838	0.916955	0.00397066	0.00110991	-0.0378776	0.920294	0.00567176	0.607099	0.012349	1	-0.00162063	0.621139	-0.0114557	0.0623985	-0.0270739	0.113535	-0.0242069	0.837185	0.0066384
PLGRKT	2.02518e-15	0.0863883	0.855327	0.00511761	0.00951804	0.0310433	0.830641	-0.00764052	0.182194	0.0217045	1	-0.00230705	0.770305	0.00854307	0.653693	0.0109805	0.010024	-0.0344106	6.17867e-09	0.0657154
CD274	0.405638	0.0129364	0.407331	0.01352	1	0.000795333	0.851808	-0.007168	0.954107	0.00552219	0.652398	-0.0115662	1	-0.000492735	0.858148	0.00698283	0.352692	-0.0168582	0.391879	0.0146025
PDCD1LG2	1		1		1		1		1		1		1		1		1		1
GTF3A	0.0015787	-0.0374024	0.64666	0.00892956	6.96132e-42	0.143919	0.304408	-0.0176025	0.368195	0.0169667	0.796204	-0.00873922	0.191642	0.0211003	0.902482	0.00603365	0.0429967	0.0287964	0.0211322	-0.0298912
MTIF3	0.630449	0.00873736	0.409296	0.0134789	0.204671	0.0174575	0.404651	0.0154719	1	-6.94981e-07	0.75846	0.0095259	0.776022	0.00840458	0.823575	-0.0076734	0.420932	0.0153402	0.956208	-0.00425943
LNX2	0.835156	0.00521952	0.750662	-0.00702244	1	0.000957979	1	5.88084e-05	0.656491	0.011485	0.746186	-0.00977766	0.956814	0.00450258	1	-0.00307311	0.890192	0.00576987	0.753108	-0.00806974
IL19	0.730545	0.00700682	0.72814	-0.00744336	0.403776	0.0128976	1	0.00203525	0.0112815	0.0339429	0.77914	-0.00907152	0.908789	-0.00562922	0.872323	0.00669393	0.370924	0.0164446	0.217991	0.0186967
DYRK3	1.33995e-13	-0.0808703	0.00416727	0.035018	6.67823e-05	0.0452807	0.777208	0.00866639	0.689852	-0.0108839	0.421771	0.0158759	0.351854	0.0168744	0.19439	-0.0210766	0.124869	0.0237066	2.28296e-13	-0.0812474
MAPKAPK2	5.81753e-29	-0.119531	0.00128852	0.0386216	0.92859	0.00369908	7.99683e-07	0.0571173	0.000310145	0.0445052	0.0213301	0.0316145	3.50203e-08	-0.0633372	0.0262234	0.0306836	7.50142e-05	0.048212	0.141969	0.021203
IL10	1	0.00146352	0.598013	0.00984723	7.67726e-14	-0.081238	0.683974	0.0103752	0.7684	0.0093862	0.845479	0.00771202	0.22805	-0.0199917	0.000783084	-0.0421322	0.475538	-0.014197	0.249651	0.0178487
LAMP2	0.0409051	0.0259648	0.0650175	0.0245937	0.226723	0.0168395	1.29723e-14	0.0851744	0.543652	0.0135334	1	-0.00276261	0.961337	-0.00440287	0.875585	-0.00661406	1	8.50592e-05	5.27379e-10	0.0698
ATXN10	0.395367	-0.0131532	0.768536	-0.00669919	0.209124	0.0173259	0.114029	0.0234298	1	-0.00173051	1	-0.00261047	0.0395219	-0.0289694	1.64751e-06	-0.0563581	0.231242	0.0199777	1.78241e-05	0.0502091
FOXRED2	0.115993	-0.0210213	0.0432854	-0.0264006	0.0317507	0.0264988	0.643383	-0.0111028	1	0.003797	0.445261	0.0154353	1	0.000751376	0.25876	-0.0192561	0.815052	-0.00741104	0.404514	-0.014361
EIF3D	0.000772633	-0.0394909	0.751338	-0.00701042	5.50411e-18	0.0932669	0.664292	-0.0107382	1	-0.000152242	0.876348	0.0070348	0.00482757	0.0364945	1	-0.00256972	0.0292736	0.0303953	0.000934755	-0.0401563
H3F3B	1.78145e-08	0.0626889	6.15488e-09	0.0650386	0.00160856	-0.0367848	0.000282065	-0.044079	0.141067	0.0231475	0.499656	0.0144398	0.0812312	-0.0257535	0.0108607	0.0339072	0.0605155	-0.0273018	1.50178e-40	0.142665
NUP50	1	0.00135367	1.3236e-07	0.0595468	2.07548e-12	0.0766325	0.00802607	-0.0342333	0.232514	-0.0202072	0.344766	-0.0174745	0.879033	0.00633456	0.174349	0.0217269	0.522808	0.0132535	1	0.0020106
PHF21B	0.685327	-0.00776019	0.364843	0.0144099	0.0191806	0.0284815	0.0949197	0.0243707	0.250433	-0.0197037	0.974102	0.00453024	0.19594	-0.020951	0.145366	0.0227571	0.581328	0.0121045	0.529499	0.0120353
IFT27	0.64282	-0.00852724	0.171127	0.0195436	0.133497	0.0198392	0.362701	0.0163269	0.931562	-0.00607126	0.000371421	-0.0441945	5.38053e-05	0.0486661	1	0.00188899	1	-0.00170807	1	0.00159395
PACSIN2	0.8941	0.00422799	0.0912427	0.0229514	0.0106815	-0.0306374	0.659276	0.0108336	0.833688	0.00811624	0.668503	0.0112438	0.666277	-0.0105715	0.396542	-0.0159943	0.870828	-0.00621995	0.191775	-0.0194603
CMAH	1	0.00218706	0.884266	0.00459158	0.00241371	-0.0355534	1	-0.00251328	1	0.00294153	0.757841	-0.00954484	0.173953	-0.0217204	1	-0.00322307	1	0.00128569	0.96161	0.00413673
TTLL12	0.0887095	-0.0223837	0.765439	-0.00674678	0.00119437	0.0376653	0.187214	-0.0207094	0.931156	-0.00609004	0.109666	-0.0244882	0.122814	0.0236793	0.468513	-0.0145054	0.0254887	-0.0309263	0.165524	-0.0203258
BIK	5.70469e-08	-0.0605956	0.0233827	-0.0289344	0.16652	0.0186404	0.41252	-0.0153132	0.305649	-0.0183462	0.636438	0.0118826	0.920436	0.00537499	0.801554	-0.00810791	0.620664	-0.011347	1	-4.22181e-05
SCUBE1	8.40399e-236	-0.335355	1.24738e-74	-0.192261	2.13265e-06	0.0530383	1.84651e-09	-0.0679798	0.172345	-0.0220386	2.80738e-09	-0.0680582	3.90411e-59	0.172054	3.08059e-24	-0.110651	1.84018e-94	-0.216979	3.01307e-42	0.145604
TOX4	0.483569	-0.0113788	0.627616	-0.00929115	1	0.000676751	0.596858	0.0119295	0.773891	0.00930321	0.688737	-0.0108132	0.508317	0.0136159	0.982563	0.00402234	0.442908	-0.0148551	0.182597	0.0197476
MRPS18C	0.0255321	-0.0279016	0.000666003	0.0405039	8.11349e-14	0.0811627	1	0.000475957	0.195198	-0.0213023	1	-0.000151702	0.055343	0.0275318	0.441249	-0.0150397	0.955888	0.00425705	0.325479	0.0160284
SULF1	2.71573e-43	0.146438	6.36263e-47	-0.152683	1.98729e-251	-0.345717	2.76733e-17	-0.0927711	0.189979	-0.0214638	0.979144	-0.00438809	1.52809e-233	-0.334511	0.000667047	0.0425752	3.15679e-05	-0.0502571	2.95202e-53	0.16335
SRSF6	0.525296	0.0106091	0.324027	0.0153302	6.87552e-29	0.119176	0.829717	-0.0076686	0.960025	0.00531646	0.176264	0.0218774	1	0.00239521	0.0959631	0.0249928	0.0652806	0.0269474	0.00259439	-0.0371075
PLCG1	0.522706	-0.0106654	0.520103	-0.0113066	8.44262e-07	-0.0549328	0.205393	0.0201526	0.788953	0.00902744	0.0563566	-0.0276569	1	0.00256095	0.00382077	-0.0374116	0.885642	0.00587977	0.652945	0.00986503
KCTD2	2.09822e-06	0.0535781	0.951876	-0.00326921	0.677052	-0.0081516	1.63553e-06	-0.05571	0.940151	0.00587471	0.752978	-0.00964238	0.483055	-0.0141431	0.940787	0.00507021	0.802478	0.00768855	0.227847	-0.0184226
TMPRSS6	0.604796	0.00917314	0.778728	0.00651462	0.837734	0.00539367	0.930498	-0.0054353	0.954626	0.00549188	0.919823	-0.0059989	1	0.000160795	0.566718	0.012614	0.993415	-0.00329809	1	-0.000642635
KCTD5	0.273482	0.0158743	0.122991	0.0213932	0.848614	-0.00519201	0.136361	0.0225084	0.596614	-0.0125448	0.0836691	0.0258161	0.338595	-0.0171828	0.218422	0.020357	0.772686	0.00826536	0.9548	-0.00428555
POM121L2	0.174566	-0.0187404	0.496294	-0.0117683	0.867894	0.00485615	1	-0.00309874	1	-0.00227207	1	-0.000956013	1	-0.00329821	0.713028	-0.00980773	1	-0.00177971	1	0.000787127
ETAA1	0.0384261	0.0262332	0.00014243	-0.0445782	1.07427e-05	0.0495443	0.0214631	-0.0307009	0.415326	0.0160279	0.268183	-0.0192805	0.0187764	0.0318704	0.334936	-0.0174185	0.425874	-0.0152314	0.961865	-0.00413187
MATN4	0.000115479	0.0445308	8.25635e-05	-0.0459351	0.349457	0.0139706	5.09265e-05	0.048282	0.0156356	-0.0327669	0.00239083	0.0389863	0.015697	0.032527	0.501682	-0.0138534	0.110212	0.0243613	4.40982e-05	0.0481072
SLPI	0.849394	-0.00498619	1	0.000546165	0.857159	0.00504508	1	0.00165355	0.487396	0.0146062	1	0.00285459	0.312332	-0.017813	0.993971	-0.00372765	0.484589	0.0140303	0.553787	0.0115791
RBPJL	1		1		1		1		1		1		1		1		1		1
SDC4	0.648752	0.00841224	4.87015e-09	0.0654432	0.772344	-0.0065253	4.8126e-42	0.145075	1.12932e-11	0.0762923	0.201843	-0.0210888	1	-0.000950759	0.865749	0.00682922	0.229889	0.0200209	1.73828e-09	0.0678492
IL13RA1	0.213357	0.0174975	0.0835532	-0.0233948	1	-0.000602743	1	0.00221525	0.182194	0.0217064	0.533751	0.0138097	1	-0.00240748	0.259223	0.0192441	0.24998	0.0194489	0.228677	0.0183991
NBR1	0.199081	0.0179394	2.05769e-11	-0.0741263	5.04303e-09	-0.064427	0.196958	-0.0204104	0.527382	0.0138399	0.876954	0.0070174	0.997486	-0.00346652	0.010573	0.0340061	0.000270131	-0.0450612	0.00300292	0.0366436
CYTH1	0.322557	0.0147141	0.0492519	0.0258435	0.0223721	-0.0278872	0.155625	-0.0217568	0.717709	0.0103801	0.173709	-0.0219709	0.119551	0.023827	0.959176	-0.00462121	0.804566	-0.00764879	1	0.00118959
RND3	1.04774e-81	0.200887	6.12479e-128	0.250328	1.35037e-56	-0.1674	4.54508e-09	-0.066477	0.445679	0.0153918	0.231764	-0.0202489	0.37928	-0.0162798	1.82017e-05	0.0513548	1.66591e-10	0.0725469	0.073711	-0.0245455
BRCA1	0.0450878	-0.0255421	0.0370758	-0.0270582	1.96311e-09	0.0660319	0.732823	-0.00948991	0.0760079	0.0262907	0.0369877	-0.0294426	0.373972	0.016394	0.785052	0.00844392	0.26604	0.0190142	0.607765	-0.0106359
GAST	1	0.00109279	0.731039	0.00739155	1.2808e-06	-0.0540894	0.955299	0.00480152	0.997819	0.00425489	1	0.00283422	0.757542	-0.008816	0.432089	-0.015247	1	-0.00217551	0.92596	0.00491153
CNTNAP1	0.313906	-0.0149092	0.99954	0.00233735	0.0652236	-0.0233733	1	-0.000377529	1	-0.00116101	0.860655	0.00736313	1	-0.00313922	0.972497	-0.0042604	1	-0.000189293	0.95166	0.00437324
NT5C3B	1.28671e-24	-0.110012	7.67764e-10	0.0684977	0.903436	-0.00419678	0.158782	0.0216465	0.0915165	-0.0253966	1	0.00226858	0.000132944	0.0465208	1	-0.00288224	1	-0.000626074	0.728426	0.0085175
COA3	1	0.0011913	0.000738247	0.0402152	0.133793	0.0198278	0.950112	-0.00493916	0.729764	-0.0101792	0.00424259	0.0372332	1	-0.00243184	0.192816	0.0211355	0.257729	0.0192318	0.135071	0.0214671
ZPBP2	0.381457	-0.0134413	0.56385	0.0104581	0.792772	-0.00619434	0.863271	-0.00692701	1	-0.00150765	1	0.00151535	0.274365	-0.0187655	0.960485	0.00458225	0.400559	0.0157821	1	-0.00034037
GSDMA	0.0405608	-0.0260019	0.901658	-0.00425117	0.914116	0.00398424	1	-0.000632285	1	-0.000766492	0.763359	0.0094204	0.977987	-0.00399597	0.532122	-0.0132754	0.0741764	-0.0263464	0.596709	0.0108372
MED24	0.209062	0.0176338	0.337101	0.0150328	0.77533	0.00647391	0.862641	0.00694163	0.00461616	0.0368707	0.387287	-0.016563	0.873043	0.00647549	1	-0.00277403	0.550635	-0.0127275	1	-0.000955734
GSDMA2	0.383241	-0.0134062	0.659148	0.00870986	0.62364	0.00901914	0.85469	0.0071136	0.939942	0.00589007	0.939654	0.00546025	0.837845	-0.00718028	1	0.000141012	1	0.00112862	1	-0.00261605
PSMD3	5.93967e-06	-0.0513845	0.00109715	0.039091	5.0862e-18	0.0933597	0.0687352	0.0258902	0.822963	0.00837227	0.0153178	0.0328695	0.892805	-0.00599378	0.865383	-0.00683868	0.0831043	0.0257852	0.704052	0.00895364
EXOSC10	0.850109	-0.00497309	0.901658	-0.00425174	2.50843e-06	0.0526954	0.0447019	-0.0277763	0.481664	-0.0147141	1	-0.00376872	0.753212	0.00890099	0.295096	-0.0183481	0.493514	-0.0138529	0.868135	-0.00607147
GLOD4	0.671329	0.00800384	0.601247	0.00978038	0.00735501	0.0319394	0.00607595	0.0351446	0.551917	0.0133664	1	-0.00277471	1	-0.000481172	0.000790819	-0.0421065	0.519261	0.0133223	0.423574	0.0139816
VPS53	0.141477	0.0199336	1	-0.0022358	0.809485	-0.00589853	0.918346	0.00572321	0.481664	0.0147143	0.474651	-0.0149087	1	-0.00167613	0.342136	-0.0172569	0.348836	-0.0169514	0.0435002	0.0269312
TAOK1	0.48593	-0.0113266	0.833263	0.00551753	0.000263398	-0.0418278	0.281145	-0.0181492	0.136083	-0.0233374	0.389858	-0.016517	0.559896	-0.0126181	0.60753	-0.0118373	0.645104	-0.0108809	0.830629	0.00675085
DNTTIP1	0.0388181	-0.0261924	0.000116017	0.0450891	1	0.00181367	0.0289815	0.0295704	0.299588	0.0184818	0.62825	0.0120201	0.738003	0.00920658	0.931902	-0.00531667	0.283626	0.0185648	0.0761186	0.0244038
TNNC2	0.0767811	-0.0231012	0.169542	-0.0195957	0.549157	0.0102723	0.402994	-0.0155029	1	-0.00241655	0.247142	-0.0198207	0.56811	0.0124703	0.0550535	-0.0276188	0.56223	-0.0124977	1	-0.000582638
ACOT8	0.00716434	-0.0325926	0.00320194	-0.0358654	0.95999	-0.00307588	0.571386	0.0123445	0.410937	0.0161197	0.603305	0.0124775	0.832214	0.00729522	1	-0.000543738	0.019809	-0.031921	0.00420381	0.0355833
CD300LG	0.836544	-0.00519812	0.0259564	0.0285253	0.213811	0.0171942	0.660162	0.0108164	0.823011	0.00836814	1	0.000682658	0.856627	0.00682954	1	-0.000245816	0.388518	-0.0160393	0.9841	0.00355472
SPINT4	1	-0.00163746	0.196661	-0.0186946	1	0.000498822	1	-0.00355335	0.858718	-0.00765836	0.0228279	0.0313593	0.606891	0.0117321	1	0.0021956	0.801406	0.00770554	0.294004	-0.0167422
PYY	0.225441	0.0171412	0.102867	0.0223487	0.686735	0.00799633	0.805109	-0.00813975	0.928568	-0.00616413	0.73666	-0.00994773	0.915046	0.00548975	1	0.00292827	0.935201	0.00478091	0.813832	-0.00702507
MPP2	0.0743781	0.0232576	5.74723e-73	0.190124	6.93965e-10	0.0677572	2.30021e-24	0.110399	1.12241e-24	0.111431	0.400749	0.0162877	0.953949	0.00456307	4.17831e-12	0.0778658	6.84937e-09	-0.0665518	1	0.000531531
PPY	0.968075	0.00292125	0.0828504	0.0234393	0.400633	0.0129605	0.803742	0.00817664	0.896329	0.00691388	1	0.00297654	1	0.000526884	1	0.00251723	0.998533	-0.00316425	0.389292	0.0146532
VTN	0.419698	0.0126513	7.68467e-12	0.0755739	0	-0.530322	1.34124e-09	0.0685112	2.25578e-08	0.0642421	1.09548e-05	0.0525498	1.32115e-29	-0.12199	4.62353e-93	-0.215299	1.75564e-12	-0.079284	4.239e-21	0.102763
NLK	0.430498	-0.0124286	0.77459	0.00659077	1	0.000644043	0.321051	-0.0172273	0.380586	-0.0167226	0.57469	-0.0130396	0.00209691	-0.0390959	1	0.00103741	0.927013	-0.00496428	0.404494	0.0143626
TRAF4	4.49386e-22	-0.10403	0.00097033	0.039441	1.02427e-10	-0.0708094	1.14082e-07	0.0608428	0.184968	-0.0216131	0.2789	0.0190001	9.9281e-17	0.0915686	1	0.00220518	0.000476345	-0.0435805	1.33944e-07	0.0602158
ALDOC	0.00580019	0.0333054	0.00114028	-0.0389739	6.81706e-52	-0.16029	7.89109e-10	0.0693732	1	-0.00069638	0.00639613	0.0359215	0.966654	0.00428734	0.000134742	-0.0466896	0.00249896	-0.0388795	0.277171	-0.0171556
STAC2	0.642511	-0.00853144	0.0480543	-0.0259451	0.285684	0.0153736	0.000343139	0.0435749	0.621569	-0.0120772	0.196782	-0.0212408	1	0.00160049	0.456392	-0.0147619	0.262207	0.0191046	0.232056	0.0183104
RPL19	0.000382147	0.0414307	0.00205105	0.0372526	1.58891e-08	0.0624174	0.938935	0.0051994	1	-0.000994422	0.0174301	0.0323723	0.932791	0.00510864	6.73654e-05	0.048382	3.99016e-05	0.0497163	0.0228513	-0.0295933
NEK8	0.388873	-0.0132893	0.263546	-0.0167816	0.00123097	-0.0375764	0.0709205	0.0257438	0.997819	0.00426151	0.672823	0.0111602	0.570904	-0.0124131	0.932038	-0.00529854	0.710433	-0.00957027	0.184963	0.0196692
CACNB4	0.184976	-0.0183984	0.00281646	0.036264	0.960039	-0.00307472	0.0454374	0.0277113	0.0303233	0.0302545	0.491389	0.014596	0.00437137	-0.0368146	0.95653	-0.00466857	0.483344	0.0140546	0.918992	0.00506691
PLXDC1	0.540554	-0.0103217	0.903951	-0.0042067	0.931815	0.00363652	0.863148	-0.00693043	0.931483	-0.00608461	0.71749	-0.010308	0.61527	0.0115487	0.573653	-0.0124861	1	-0.0023022	1	-0.00039287
ARL5B	0.00731527	0.0325226	6.82396e-19	0.0963618	0.729748	0.00729004	1	-0.00227735	0.652814	0.0115455	0.729507	-0.0100946	0.0571432	0.0273745	0.0109512	-0.0338789	0.00015199	0.0465027	0.000262322	0.0436336
ZFP207	0.728348	0.00704276	0.0158052	-0.0304323	0.245031	0.0163607	1	0.000718052	1	0.00399481	0.702336	0.0105763	0.51777	-0.0134215	0.334422	0.017433	0.775937	-0.00819551	0.516091	-0.0122669
PSMD11	0.00956895	0.0315809	0.697743	-0.00800852	1.29498e-07	0.0585897	1	-0.00364315	1	0.000436922	0.621345	0.0121483	0.680245	0.0103056	0.781975	0.00849219	0.79393	0.00784141	0.665424	-0.0096566
C1QTNF1	0.000959298	-0.0388704	1	0.000402683	0.00490192	-0.0332951	1	6.18052e-05	0.997448	0.00428712	0.838921	-0.00784688	0.62309	0.0114024	0.743169	-0.00924624	0.880396	-0.00602873	0.732737	0.00845229
PIPOX	3.73372e-11	0.0727801	1.3959e-17	-0.0928616	3.82354e-26	-0.113242	4.89087e-06	-0.053455	0.24129	0.019937	7.17178e-28	-0.118785	1.33358e-13	0.0823733	0.282416	0.0186723	1.1074e-08	-0.0657345	0.00135144	-0.0390713
TIMP2	0.000339084	-0.0417524	0.0010167	-0.0393082	2.69612e-20	-0.0993361	4.3478e-09	0.0665561	0.324353	-0.0179094	0.765734	0.00936961	3.08576e-05	-0.0499561	0.584079	-0.0122748	0.839005	0.0069058	0.983593	-0.00357448
ZC3H18	0.558913	-0.00999702	0.0271304	0.0283482	2.65183e-16	0.0885771	0.0860045	-0.0248511	1	-0.00182683	1	0.0031633	1	-0.00169182	1	0.00317878	0.115547	0.0241101	3.84461e-06	-0.0535744
TOP2B	0.124222	0.0206545	0.000235815	0.0432933	5.05626e-06	0.0511968	0.00843523	-0.0340735	0.959895	-0.00532694	3.98607e-05	-0.049652	2.19246e-10	0.0717382	4.71898e-07	-0.058795	0.129471	-0.0235131	0.0190885	0.0302803
RARB	0.0886786	-0.0223862	2.16443e-68	-0.184127	3.25845e-05	-0.0470068	1.31897e-38	0.139028	2.82447e-46	-0.152438	1.90282e-13	-0.0823026	0.00330831	0.0376929	2.17662e-17	0.0936466	1	0.00025201	0.0733427	-0.024568
IGFBP4	2.76546e-18	-0.0943879	7.00522e-05	0.0463281	0.0582498	0.0238932	2.54696e-13	0.0812181	0.0615514	-0.0272579	4.15226e-24	0.110484	1.33729e-08	0.065013	1.21247e-16	-0.0915855	0.000235605	0.0454044	0.000266736	-0.0435891
CDC6	0.266748	0.0160368	0.368944	-0.0143271	2.29712e-15	0.0858673	1	0.0031243	0.204526	-0.0210113	0.3793	0.0167476	1	0.00041746	0.581587	0.0123263	5.66506e-07	0.058588	0.313247	-0.0163091
SUZ12	4.06421e-05	0.0470639	2.96193e-06	-0.053405	0.000174213	0.0428984	6.83969e-06	-0.0527329	0.948092	0.00567051	0.961432	0.00491812	0.0249922	-0.0308147	0.0136557	0.0330827	0.515823	0.0133938	0.00170267	-0.0383822
ATAD5	0.061997	0.0241112	0.484495	-0.0120095	1.2429e-12	0.0773639	0.000132441	-0.0460068	0.0299307	-0.0303069	0.844801	-0.00773121	0.0196825	0.0316961	0.00538199	0.0362849	0.631631	0.0111335	0.301151	-0.0165798
CRLF3	1.93704e-10	-0.070234	8.69137e-05	-0.0458083	0.000160135	0.0431147	0.0928014	-0.0244932	0.745731	0.00984458	0.716496	0.0103247	0.311372	-0.017837	0.966743	0.00441549	0.647629	0.0108326	0.000339907	0.0429561
KRT27	0.522706	-0.0106653	0.933595	-0.00365726	0.860721	0.00498597	1	0.00132035	1	0.00130764	0.924459	0.00586173	0.417457	-0.0154586	0.978729	-0.00414998	0.499551	0.0137182	0.983593	-0.00357922
TNS4	0.133518	0.0202746	0.625463	-0.00933125	0.00109383	-0.0379204	0.988005	-0.00400264	0.740644	-0.0099594	0.000471678	0.0435551	0.764819	0.00867669	0.0469765	-0.028298	0.063519	-0.0270738	0.203831	-0.0190899
TNFAIP1	0.963134	0.00301042	0.000439041	0.0416453	9.85725e-06	0.0497346	1	0.00360212	0.0738377	0.0264175	0.233456	0.0201997	1	-0.00231435	0.203498	-0.0207974	0.0203632	0.0318154	0.0012966	-0.0391949
ABR	0.618398	-0.00894156	0.083518	-0.0233971	1.19188e-32	-0.126853	0.00544081	0.0355137	0.633722	0.0118522	1.32119e-25	0.113877	0.552349	0.0127509	1.15019e-06	0.0570652	0.0481628	0.0282999	6.13832e-18	-0.0945543
RAB11FIP4	6.95555e-16	-0.0877299	2.99325e-07	0.0579839	7.53322e-09	-0.063733	0.0147498	0.03211	1.54184e-12	0.0791719	0.770193	0.00929416	0.00396435	-0.0371337	0.576739	0.0124132	1	0.00155038	0.00950647	-0.0328435
CD40	0.32557	-0.0146465	9.90085e-07	0.0556483	1.92449e-08	-0.0620744	0.0356772	0.0287324	0.0067579	0.0356601	0.00809215	0.0351292	0.000150202	-0.0462068	0.0102556	-0.0341092	1	-0.00142109	0.0429366	0.0269909
SLC35C2	0.00222223	0.0363712	8.77582e-07	0.0558864	0.0107699	0.0306071	0.9881	-0.00399286	0.737899	0.0100214	0.232796	0.0202221	0.624816	0.0113545	0.0169089	0.032322	0.481517	0.0140979	0.114129	-0.0223635
ZFP334	0.245079	-0.0165982	0.0848034	0.0233216	0.242173	-0.0164315	0.785485	-0.00850363	0.284024	0.0188457	0.894748	-0.00659067	1	0.00290155	0.493514	-0.014	0.95837	-0.00419067	0.12753	-0.0217709
ELMO2	0.169958	0.0188953	0.392707	0.0138187	5.19318e-05	-0.0459009	0.930916	0.0054133	0.595561	0.0125659	0.486607	-0.0146767	1	0.000437922	0.778151	-0.00857198	0.960252	-0.0041252	0.693075	0.00914037
WSB1	0.022473	0.0284064	9.72244e-05	0.0455293	0.00157462	-0.0368492	0.401434	-0.0155378	0.900487	0.00682883	0.982506	-0.00430876	0.706699	0.00980398	1	0.000223182	0.829265	0.00712913	0.0786357	0.0242425
TTPAL	0.615538	-0.00899267	1	-0.00115575	0.0580999	0.0239074	0.935059	0.00529512	0.896439	0.00690837	0.592663	0.0126846	1	0.00112113	0.934057	-0.00524788	0.103594	0.0246895	0.0694333	0.0248345
RHOT1	0.0100602	0.0314052	0.190158	0.0188964	0.0027108	0.0351895	0.832862	-0.00759691	0.519525	-0.013983	0.931385	-0.00568018	0.503802	-0.0137114	1	-0.00101824	0.162726	0.0222003	0.256243	-0.0176747
HNF4G	0.000661887	0.0399233	7.61275e-07	-0.05617	0.823283	0.00564711	5.33379e-32	0.126583	1.79626e-07	-0.0605209	0.000750822	-0.0423105	1	0.000403989	0.592724	0.0121322	1	-0.000303557	0.415117	0.0141566
RHBDL3	0.450374	-0.0120317	0.0203385	0.0294699	0.0167013	0.029005	0.264982	0.0185665	0.000957321	0.0414819	0.0298435	0.0303129	4.842e-05	-0.0489202	5.44883e-06	0.0539358	0.0861134	-0.0256231	0.523608	0.012133
ADA	2.10552e-109	-0.231814	9.55862e-10	-0.0681447	6.18322e-23	0.10584	0.971654	-0.00443535	0.201956	-0.0210962	0.0612895	0.0272809	5.11444e-14	-0.0836484	4.75639e-50	-0.158759	0.0394286	0.0291641	0.000850879	0.0404248
SERINC3	0.000512675	0.0406304	0.0304601	-0.0278817	4.25632e-08	-0.0606449	3.64219e-05	0.049054	0.0229028	0.0313732	0.0977654	-0.0250366	1	0.00119456	0.000918414	-0.041693	0.46097	-0.0144866	1.95533e-09	0.0676516
THA1	0.387482	0.013315	0.552493	0.0106495	0.578053	0.00979303	0.948607	-0.00499393	1	7.10056e-05	0.84058	-0.00781249	0.988821	-0.00368582	0.311801	-0.0179615	0.515143	0.0134087	0.929252	-0.00484231
PGS1	0.0188933	0.0290864	7.2136e-06	0.0515124	0.000367044	0.0409497	0.0300744	0.0294204	0.0457609	0.0285533	0.558053	0.0133744	0.754577	0.00886355	0.0528859	-0.0277848	0.57806	-0.0121629	0.753831	-0.00805308
BIRC5	0.418235	0.0126834	6.06486e-06	0.0518844	4.51144e-130	0.252253	8.93645e-08	-0.0612834	0.274103	-0.0190971	1	0.00261389	0.503636	0.0137157	0.00521262	0.0363803	0.0677546	0.0267825	9.9124e-12	-0.0759086
AFMID	1	-0.00206419	1	-0.00141499	0.309398	-0.0148265	1	-0.0025697	0.981707	0.00474243	0.265235	-0.0193605	0.957693	0.00448251	1	-0.00345422	1	0.00233966	0.0694999	0.024828
PIGT	0.914339	-0.00386857	0.204989	-0.0184403	0.795452	-0.00613819	1	4.18312e-05	0.0248893	0.0310478	0.822059	0.00819674	0.413097	0.0155474	0.147984	-0.0226496	0.657315	-0.0106339	0.32262	0.0160925
WFDC2	2.38845e-209	-0.317003	0.979608	-0.00273329	4.80316e-23	0.106102	1	-0.000348214	0.0138974	-0.0332001	0.00266425	-0.0386639	1.13128e-06	0.056888	2.16161e-35	-0.133667	0.334632	-0.0172776	0.163642	0.0203918
ETV4	0.213219	-0.0175038	1.38983e-18	0.0955518	8.08316e-06	0.0501781	5.10097e-05	0.0482772	0.758995	-0.00954231	6.7887e-06	-0.0535825	1.0543e-11	0.0762912	5.94331e-35	-0.13282	0.0860553	-0.0256278	0.0228516	0.0295921
EPPIN	0.0716265	-0.0234436	1	-0.0008844	0.479156	-0.0115028	0.874521	0.00665912	0.92845	0.00616976	0.77837	0.00908847	0.338465	-0.0171864	0.726817	-0.00956759	1	0.00259677	0.914502	0.00518958
DBNDD2	1	0.00158815	1	-0.000231312	0.210885	-0.0172756	1	-0.00141997	1	0.00242685	0.712713	-0.0103845	0.920436	-0.00537478	1	0.000442428	0.990212	0.0033732	0.980925	0.0036494
MMP9	0.0591084	-0.0243407	0.836895	-0.00544478	1	0.000190936	1	0.00154768	1	0.00340497	0.806839	0.00851	0.709308	-0.00975569	0.421711	-0.0154597	0.613488	-0.0114811	0.70955	0.00885152
SLC12A5	2.78765e-21	0.102091	5.1118e-16	-0.0884943	1	-0.000796654	7.04124e-21	0.1021	0.603577	-0.0124141	7.69963e-21	0.102714	0.00816463	0.0348035	0.73786	-0.00934681	0.50688	0.013568	0.732975	-0.00844601
GHDC	1	0.00020354	0.0824976	0.023458	0.00993623	-0.0308912	0.916271	-0.00578001	0.199369	0.0211781	0.864591	-0.00727683	0.625674	-0.011332	0.0719861	-0.0263967	1	0.00164553	0.000917178	0.0402121
PLTP	4.36807e-15	0.0854022	1.11943e-74	0.192325	1.05013e-90	-0.211511	1.18673e-08	0.0648559	0.397845	0.0163854	0.346212	0.017441	0.794617	-0.00804644	0.00891496	-0.0345918	6.4718e-12	-0.0774242	5.08458e-06	-0.0529753
SLC12A7	9.61833e-07	-0.0551639	0.00485448	0.0345221	0.950252	-0.00326891	0.265042	-0.0185608	0.0177543	-0.0323287	0.982506	-0.00430769	0.69938	0.00995905	0.906899	0.00594279	0.48194	0.0140887	1	0.00181161
CTSA	0.415905	0.0127318	0.465446	-0.0123783	4.59799e-08	-0.0605043	0.801554	0.00821883	0.0088393	0.0347933	0.275054	-0.0190955	0.0252494	-0.0307757	0.84782	-0.00718309	1	0.00245149	0.386363	0.0147158
ZSWIM1	0.0277536	-0.0275782	0.295823	0.0159809	0.0131522	0.0298893	1	6.64359e-05	0.972203	0.00497992	1	0.000601149	0.733104	-0.00931232	1	0.0033652	0.0971351	0.0250377	0.910076	-0.00527704
SLC12A4	0.0771054	0.0230813	0.0148026	0.0306737	3.16219e-11	-0.0726127	0.231036	0.0194342	1	-0.00180171	0.572979	-0.0130659	0.410393	0.0156064	0.833449	-0.00751461	0.384586	-0.0161261	0.226649	-0.0184585
SPATA25	0.596836	-0.00932495	0.834933	0.00548654	0.000417158	-0.0406068	0.875568	0.00663996	0.938665	0.00591428	0.888686	0.00676203	0.229013	-0.0199605	0.0865917	-0.0255	0.709367	0.0095951	1	0.00247107
MYO1C	0.000118554	-0.0444663	0.00196928	-0.0373768	1	-0.00079805	0.00830271	0.0341266	0.641517	0.0117262	0.223772	0.0204535	0.928938	-0.00518265	1	0.00331798	0.755925	0.00858484	0.265181	0.0174578
CRK	0.891075	0.00427613	0.322501	-0.0153647	0.379077	0.0133786	0.893918	0.00625674	0.748538	0.00978319	0.873236	-0.00708737	0.143346	-0.0228355	0.391318	0.0161084	0.629207	0.0111799	0.126153	-0.0218294
COX7C	0.121673	-0.0207699	0.884266	-0.00459295	2.85198e-18	0.094045	0.00344579	0.0369892	0.283504	-0.0188614	0.000946379	0.0416659	1	-0.000276911	0.379349	0.016394	0.076076	0.0262195	0.1902	0.0195052
PITPNA	0.395481	0.0131482	0.000476854	0.0414154	6.06344e-12	0.0750752	0.0409852	0.0281473	0.893555	0.00697129	1	-0.00290017	0.435273	0.0150943	0.00884411	-0.0346198	0.0112471	0.0339951	0.283292	0.0169996
MLX	0.136617	0.020136	0.0557215	0.0252994	0.885154	-0.0045376	0.154748	-0.021794	1	0.00284889	0.502104	0.0143906	0.682581	-0.010265	0.175477	0.0216856	0.00171205	-0.0399943	0.000901356	0.0402604
FAM134C	0.146042	0.0197657	0.53614	-0.0109865	0.0269115	-0.0271616	0.846333	0.00727864	0.769499	0.00936887	0.812458	-0.00838858	0.825332	-0.00743944	1	0.000258924	0.183029	-0.0214702	0.0260317	0.0290732
JPH2	0.449436	-0.0120505	0.41032	-0.0134584	0.401002	-0.0129528	1	0.00290389	0.353879	0.0172827	0.884412	-0.00687851	1	-3.88871e-05	1	-0.00262998	0.425336	-0.0152421	0.431924	-0.0138218
DHX58	0.167647	-0.0189761	1	-0.00217852	0.543101	-0.0103756	0.986316	-0.00404933	0.544234	0.0135176	1	0.00163385	1	0.000418946	1	0.00051769	0.564156	-0.0124605	0.954843	-0.00428091
RAB5A	0.53312	0.010457	0.0574322	-0.0251637	0.280627	-0.015494	0.841654	0.00739732	1	0.00208701	0.343765	0.0174924	0.173118	-0.0217502	0.966237	0.00443547	1	-0.00298747	0.0865946	0.0237716
HSPB9	0.416772	-0.0127099	0.511405	0.0114758	0.279661	0.0155183	0.970666	0.00446445	0.760002	-0.00952651	0.88638	-0.00684264	0.460646	0.0146051	0.58185	-0.0123219	0.612819	0.0115031	0.474356	-0.0130363
NKIRAS2	2.8381e-08	0.0618569	0.000309663	0.0425767	0.103238	0.0211743	0.624994	0.011435	0.528078	-0.013828	0.748324	0.00972234	0.892805	-0.00599491	1	-0.00160225	0.610447	0.011549	0.0434592	0.0269361
PPP2R5C	5.1556e-07	-0.0564098	0.384844	-0.0139834	0.127452	0.0200909	0.810167	0.00804756	0.901891	0.00680188	1	-0.00143933	0.69938	-0.00996059	0.861814	-0.00691836	0.0171512	0.0324512	0.92567	-0.00492049
IFT52	0.229957	0.0170197	0.020812	0.0293814	1	-0.000162879	0.0532001	0.0270338	0.00105219	0.0412333	0.147507	-0.0229036	0.18978	-0.0211696	0.979276	-0.00413093	1	0.00107412	0.0260317	0.0290732
MYBL2	0.00410974	-0.0344341	0.0892215	-0.0230621	6.21546e-11	0.0715852	0.379617	-0.015978	0.970736	0.00503693	0.0999685	0.0249248	0.675836	-0.0103854	0.21958	0.0203262	0.00424899	0.0372291	0.00771862	-0.0335641
SGK2	0.130087	-0.020412	0.158104	-0.0200075	0.212299	0.0172362	0.936861	-0.0052402	0.891271	0.00701428	1	-0.00303988	1	-0.00308007	0.131666	-0.0233203	0.790497	-0.00790541	0.198001	0.0192718
EYA2	9.00402e-124	-0.246183	8.47319e-61	-0.173691	0.000150077	-0.0432793	0.455145	-0.0144621	0.576196	0.0129121	0.00159981	-0.0401587	0.185293	0.0213281	3.71164e-18	-0.0957323	3.16233e-28	-0.119624	1.11058e-07	0.0605767
B4GALT5	0.128756	0.0204714	0.131586	-0.0210271	0.0720086	0.0229159	0.00924236	0.0337652	0.0194262	-0.0319997	0.0217449	-0.0315411	0.553184	0.0127297	0.962264	-0.00453039	0.789594	0.00792392	0.467297	-0.0131626
GDAP1L1	8.9902e-07	-0.0553014	0.627795	-0.009285	8.80518e-09	-0.0634598	0.879187	-0.00656493	1	-0.000776472	0.0428022	-0.0288414	0.422302	0.0153482	1	-0.00257778	0.52666	-0.0131884	0.63624	-0.0101413
HNF4A	0.131036	0.0203741	0.0518809	-0.0256129	0.994452	0.00237285	5.76079e-09	0.0660778	0.0112332	-0.0339571	0.136592	-0.0233124	0.87191	-0.00650328	1	0.00234399	1	-0.00201258	0.935239	-0.00472639
PTGIS	1.49796e-38	-0.13815	5.16712e-09	0.0653367	5.41579e-29	-0.119396	0.602754	-0.0118292	5.21097e-05	-0.0488702	5.50902e-05	-0.0488926	5.3914e-09	0.0665744	6.53214e-17	-0.0923286	0.135593	-0.0232617	0.707909	-0.00888668
CADPS2	4.41546e-75	-0.192683	2.94054e-22	-0.104799	0.805034	-0.00597918	0.816296	-0.00794377	0.312953	-0.0181745	0.930953	0.00569346	0.0644566	-0.0268223	0.00210866	-0.0392267	0.159598	0.0223073	0.189053	-0.0195411
DDX27	0.783036	-0.00609368	0.573844	-0.0102727	1.93374e-80	0.199344	0.0603571	-0.0264852	0.978315	-0.00484352	0.00131673	0.0407307	0.518929	-0.0133869	0.900702	-0.00607488	0.000847792	0.0420081	5.71222e-10	-0.0696731
CYTH3	1	0.000228907	1	-0.00168167	0.61668	-0.00913706	1	-0.00147661	0.886434	0.00709024	0.773228	-0.00921865	0.611948	0.0116153	0.0706719	0.0264885	1	-0.000992897	1	0.00309745
CYTH4	2.29489e-06	0.0533913	5.7595e-06	-0.0519948	0.736017	0.00717554	0.00972536	0.033593	4.15018e-08	0.0631689	0.0570361	-0.0275963	0.725729	-0.00944099	0.943209	-0.00501634	0.811001	0.00750293	0.839376	0.00659549
RAC3	2.42141e-11	-0.0734311	0.0159751	-0.030394	0.00265413	0.0352607	2.85511e-09	0.067256	0.0226364	-0.031419	2.64573e-14	0.0849599	1.54445e-13	-0.082177	0.0309301	0.030028	6.57391e-15	0.0867638	2.39594e-13	-0.0811785
RRP7A	0.498643	0.0110854	0.000289217	0.0427569	6.65947e-07	0.0554105	0.516041	0.013329	0.0157225	0.0327452	0.21777	0.0206218	1	0.00206108	0.0364258	-0.0293803	0.000821821	0.0420913	0.0979001	-0.0231646
CYB5R3	0.670959	0.00800952	0.0775757	-0.0237555	2.94334e-30	-0.122025	0.559929	-0.0125357	1	-0.00299384	0.00988043	-0.0344373	0.99463	-0.0035371	1	-0.00192951	0.283922	0.0185557	0.198639	-0.0192535
INTS2	0.820418	0.00546239	1	0.00156742	0.000116707	0.0439124	1	0.00122864	0.826132	0.00831076	1	-0.000973378	1	0.00304176	0.911198	-0.0058531	0.613101	0.0114965	0.335268	0.0158151
MED13L	1	-0.00124676	0.504673	0.011596	0.00227403	-0.0357387	0.0342189	0.0289071	0.592265	0.0126152	1	-0.00170582	0.335504	-0.0172617	0.165738	-0.0220147	0.731742	-0.00912179	0.000126654	0.0455245
HIST1H2BC	0.872162	-0.00460929	0.660234	0.00869295	0.000158472	-0.0431403	0.293202	-0.0178634	0.244292	0.0198652	0.79557	-0.00876317	0.992496	-0.0035901	0.819805	-0.00775548	0.291439	-0.0183579	1	-0.0010663
BAIAP2L2	4.72012e-14	-0.0822835	0.0032142	-0.0358539	0.522205	0.0107495	1	-0.00022511	0.647157	0.0116369	1	0.00224111	0.990491	-0.00363562	0.57867	0.0123731	0.516318	0.0133837	0.249066	0.0178668
MAFK	0.72648	-0.00707166	0.0849173	0.023315	3.96343e-16	-0.0880799	0.607368	0.0117429	0.452921	-0.0152486	0.803374	0.00858411	0.422668	-0.0153406	0.00136089	-0.0405333	0.204339	-0.0207816	0.877582	0.00590128
MED1	0.0948165	-0.022061	0.641826	-0.00902855	0.0251156	0.0274371	0.740262	-0.00935939	0.745043	-0.00985825	0.47898	-0.0148286	0.545969	-0.0128643	1	-0.00198517	0.877992	0.006083	0.0139416	-0.031454
ERBB3	0.0615202	-0.0241465	0.768302	-0.00670374	0.750361	0.00691424	0.75037	0.00918484	1	0.00011135	0.0120104	0.0337438	1	0.0019725	0.606269	0.0118631	0.388688	0.016034	0.406367	0.0143229
STARD3	0.635934	0.00863971	0.891079	0.00445714	0.015501	-0.0292821	0.303865	0.0176203	0.0817922	0.0259444	1	0.00296914	1	-0.00317733	0.405462	-0.0158042	0.296739	-0.0182202	0.18911	0.0195389
IKZF3	1	-0.00193229	0.468911	0.0123071	0.71932	0.00746425	1	0.00202403	1	0.000959914	1	-0.00362674	0.989192	0.00367302	0.645338	-0.0111462	0.810539	0.00751248	0.978861	-0.00369911
MFNG	0.0106508	-0.0312057	0.310692	-0.0156347	0.00054765	-0.0398641	0.00156788	0.039359	6.98035e-66	0.1815	0.0385301	0.0292773	6.26504e-22	-0.104942	1.93429e-09	0.0684985	9.97165e-08	-0.0618445	0.0192125	-0.0302575
VMP1	0.223685	0.017195	3.47155e-06	-0.0530724	0.24105	-0.0164598	1	-0.00228273	1	0.00122459	0.083403	0.0258312	7.67774e-05	-0.0478246	0.00562701	0.0361412	0.393777	-0.0159156	0.365048	0.0151669
UCHL5	0.380477	-0.0134625	0.0147768	-0.0306826	5.71375e-26	0.112853	0.916859	0.00576398	0.00232236	-0.0389356	1	-0.00242555	0.933265	0.0051025	0.932038	-0.00530256	0.768862	-0.00834712	0.087612	-0.023713
GLRX2	2.71081e-05	-0.0480135	0.547497	0.0107548	0.000203314	0.0425056	1	-0.000431369	0.228665	0.0203261	0.108947	-0.0245227	0.00897807	0.0344906	0.515585	-0.013571	0.695712	-0.00986717	0.154434	0.0207359
TROVE2	0.00722587	0.0325646	0.000388177	0.0419746	0.916518	-0.00393432	0.168205	0.0213195	0.0429354	-0.0288149	0.215557	0.020688	0.00479808	-0.0365167	0.140842	-0.0229428	1	-0.0010095	0.0223262	0.0296824
STK4	0.779681	0.00615166	0.888785	-0.00450334	0.000677311	0.0392767	0.975554	0.00434402	1	-0.000458732	1	-0.000265558	0.889026	-0.0060691	1	0.000300468	0.929149	0.00492082	0.00638108	-0.0342092
PMP22	4.05528e-05	0.0470694	1.62003e-76	-0.194648	0.666218	-0.00832655	1.37941e-13	0.0820473	0.994411	0.00441013	0.637218	-0.0118643	1	-0.00145553	0.00036313	-0.0441878	0.000454677	-0.0437049	0.106296	0.0227387
GDF9	2.11557e-05	0.0485826	0.469953	-0.0122826	1	-0.000469502	1	-0.00287504	0.38643	0.0166073	1	-0.00281088	1	0.000475352	0.529507	-0.0133267	0.861028	0.00643231	1	0.00139247
ZCCHC10	7.65353e-06	-0.050844	0.959931	-0.00311714	4.47856e-08	0.060552	0.944315	-0.00510004	0.911673	-0.00657589	0.00489605	0.0367929	1	0.00296992	0.697992	-0.0101061	0.856915	0.00653429	0.0133601	-0.0316125
TBX5	0.48154	-0.0114191	0.339442	-0.0149811	0.136685	0.0197159	0.977027	0.00429462	0.00240733	0.0388278	1	-0.00278424	0.449272	-0.0148376	0.795462	-0.00824354	0.182813	-0.0214798	0.720685	-0.00865609
PSMB6	4.05167e-07	-0.0568885	1.53655e-05	0.0498558	1.88774e-05	0.0482705	0.546458	0.0127744	0.903956	0.00674436	0.745998	0.00978155	0.148654	0.0226419	1	-0.00117312	0.357091	0.0167599	0.0322317	0.0281962
SPAG7	0.660979	0.00819915	0.360468	0.0145003	0.878005	-0.00467169	1	0.0021134	0.504719	0.0142894	0.0210443	0.031663	0.914345	-0.00550912	0.128563	0.0234675	1	-0.000775393	0.071248	0.0247017
PFN1	0.0180277	-0.0292656	7.8826e-05	0.0460469	1.05894e-25	0.112251	0.000127341	0.0461022	0.279841	-0.018956	0.000671501	0.0426171	3.67004e-05	0.0495683	0.50716	-0.0137561	1	0.00165127	6.48164e-06	0.0524524
TOMM34	0.00341194	-0.0350309	0.262379	-0.0168126	1	0.00222851	1	0.0014058	0.910907	0.0065981	0.687671	0.0108329	0.707166	-0.00979597	0.576648	-0.0124169	0.960593	-0.00411825	0.12224	-0.0220074
YWHAB	0.39957	-0.0130666	0.0263903	-0.0284525	1.20456e-10	0.0705559	0.98122	0.0041955	1	0.000925955	1	-0.000137529	0.156402	-0.0223462	0.510368	-0.0136719	0.497738	-0.0137636	0.373188	0.0149957
KSR1	1	0.000809995	0.0168858	-0.0301805	0.721982	-0.00741874	0.918796	0.00571295	0.0332596	-0.0298719	0.0255346	-0.0309121	0.745049	0.0090623	0.419982	0.0155117	0.951174	-0.00436917	0.588858	-0.0109729
GPX3	1.16824e-14	0.0841248	6.72145e-07	-0.0564144	1.28643e-106	-0.228955	1.57647e-30	0.123633	1.51553e-07	-0.0608307	1	0.000928676	1	-0.000577113	1.59921e-18	-0.0966951	5.15305e-15	-0.0870752	8.49822e-11	0.0726818
ANXA6	0.165285	-0.019058	0.494012	0.011814	1.96576e-82	-0.201769	0.00434323	0.036252	0.0247237	0.031073	0.410227	0.0160948	0.000743122	-0.0420367	7.04466e-09	-0.0663518	0.229363	-0.0200348	0.000388573	0.0425962
IL12RB2	0.706722	0.00739585	1	-0.00113965	0.993095	-0.00239783	0.267077	-0.0185024	0.817809	-0.00850063	1	0.00353258	0.597274	-0.0119273	0.979276	-0.00413215	0.205818	0.020739	0.522327	0.0121559
ZKSCAN6	0.999365	-0.00233804	1	0.00220105	0.00224383	0.0357801	6.9654e-06	-0.0526951	1.23612e-05	-0.0520662	0.128115	-0.0236625	0.227247	-0.0200146	0.901489	0.00605953	0.086644	-0.0255911	0.0147582	0.0312401
KPNA2	0.198773	-0.0179505	0.730533	0.00740132	1.22078e-17	0.0923226	0.111449	-0.0235527	0.350066	0.0173668	1	-1.78562e-05	1	0.0010052	1	0.00275945	1	0.00229899	3.51804e-05	-0.0486355
SMURF2	0.363031	0.0138203	0.642432	0.00901483	0.634322	-0.0088442	0.988654	-0.00397482	0.330211	-0.017781	1	0.00277053	1	0.000555344	0.789083	0.00837923	1	-0.00187185	0.68396	0.009338
CEP95	0.850109	-0.0049734	0.954495	-0.00322452	0.237003	-0.0165634	0.837561	0.00748506	0.108754	0.0245444	0.73224	-0.0100372	0.709361	0.00975135	0.639119	-0.0112585	0.732076	-0.00911523	0.659383	0.00975543
VEZF1	2.36741e-27	0.116104	1.32763e-15	0.0872928	3.67002e-35	-0.131727	3.07044e-06	-0.0544152	0.25881	-0.0194777	1	-0.0014311	0.200696	-0.0208022	0.990606	0.00382649	1	-0.000641832	9.26053e-22	-0.10438
CUEDC1	8.92433e-46	0.150603	3.18839e-29	0.120336	3.80481e-08	-0.0608512	0.661571	0.0107882	0.116732	-0.0241645	0.264049	0.0193965	0.74716	-0.00902861	0.303454	0.0181606	0.0121514	0.0337231	3.08608e-17	-0.0926426
SRSF1	0.00110188	0.0384687	0.0798019	-0.0236196	0.149534	0.0192365	0.0144165	-0.032195	1	0.00355971	0.72098	0.0102518	0.608353	-0.0116913	0.0327499	0.0298004	1	0.00154735	5.4775e-06	-0.05282
ABI3	0.10292	-0.0216382	0.94915	-0.00333734	0.386883	0.0132304	0.645588	-0.0110643	1	-0.00308873	0.923512	-0.00588744	0.774097	0.00845131	0.890416	0.0063434	0.325016	-0.0174789	0.762739	0.00789742
SHROOM1	0.00504994	-0.0337651	1	0.000723015	0.112845	0.0207217	0.836679	-0.00751671	0.936469	-0.00597061	0.918347	-0.00602887	1	0.000601307	0.141904	-0.022895	1	0.00158855	1	0.000199243
KIF3A	1	-0.000757768	2.15469e-06	0.0540654	5.33343e-13	-0.0785561	0.0943386	0.0244051	1	0.00260774	0.0565858	-0.0276333	0.00327777	0.0377245	8.52608e-07	-0.0576524	0.436918	0.0149736	1	-0.0013959
SEPT8	2.18014e-26	-0.113987	1.40144e-12	0.0780148	0.944409	0.00338615	0.673417	0.0105779	0.120224	-0.0240084	0.0927315	-0.0253038	0.356198	0.0167784	0.00040708	-0.0438933	0.0884183	0.0254964	1.06139e-11	-0.0758025
MTMR4	0.000329628	-0.0418284	0.00306471	0.0360001	0.572872	0.00988451	0.271993	0.0183879	0.980129	0.0047925	0.735924	-0.00996794	0.580137	0.0122235	0.0811727	-0.025815	0.938899	-0.0046554	0.431449	0.0138313
MRM1	0.181807	-0.0185025	0.600732	0.00979765	0.00334201	0.0345298	0.763419	-0.00891436	0.283626	-0.0188563	0.945102	0.00533968	0.875203	-0.00641314	0.129551	-0.0234264	0.958757	0.00416872	0.347148	-0.0155509
MAPT	0.0126556	0.0305813	4.5566e-08	0.0615202	0.00532168	0.0330281	1.63532e-15	0.0878028	2.66745e-11	0.075039	0.780541	0.0090522	0.106455	-0.0244188	0.0112645	0.0337748	0.000675445	-0.0426277	8.37334e-06	0.0518984
KANSL1	0.907176	-0.00399248	1	-0.00219378	0.650261	-0.00858713	0.399469	-0.0155776	0.218663	0.0205968	0.613605	-0.0122952	1	-9.96249e-05	1	0.00113839	0.148279	-0.0227554	1	-0.00270297
GID4	3.11128e-05	0.0476922	0.348599	0.0147722	7.50103e-05	0.0449998	0.720353	-0.00972208	0.140635	-0.023164	0.798355	0.00869813	0.9317	0.00512518	0.808909	0.00796406	0.235968	0.0198412	0.000205956	-0.0442698
MYO1B	1.94562e-18	-0.0947943	0.885465	0.0045639	1.53023e-13	-0.0802939	0.0083498	0.0341068	0.10928	0.0245153	0.265863	-0.0193434	2.4393e-05	0.0504784	0.000263637	-0.0450032	0.581566	-0.0120966	0.845648	0.00647511
DHX40	0.695624	0.00757366	0.391688	0.013839	1.0003e-21	-0.102905	0.463779	0.0142846	0.513936	0.0141125	0.143851	-0.0230274	1	-0.0032606	0.028105	-0.03041	0.815034	0.0074125	0.983927	0.00356509
YPEL2	5.45034e-07	0.0562978	0.00047341	0.0414378	3.03003e-08	-0.0612602	0.988426	-0.00398572	0.739678	0.00998049	0.0253665	-0.0309419	0.37964	0.0162704	0.00505555	-0.0364793	0.534907	0.0130264	0.013759	0.0315075
AKAP1	0.000158097	0.0437425	0.0302583	-0.0279082	1.09644e-05	0.049499	0.0604879	-0.0264753	0.227137	-0.0203745	0.769924	0.00929983	0.0152395	-0.0326373	0.434036	0.0152068	0.0286309	-0.0304787	9.78555e-12	-0.07593
NOL11	0.566159	0.00986819	0.0436063	0.0263658	4.35671e-31	0.123724	0.140569	-0.0223429	0.526367	-0.0138653	0.282114	0.0189178	0.815175	0.00766707	0.320998	-0.0177423	0.529428	0.0131365	2.6996e-05	-0.0492638
DERL2	0.109915	-0.0212982	0.993285	0.00247034	0.0374307	0.0258089	0.726964	0.00959119	0.453206	0.0152381	0.419596	0.0159157	0.0814291	-0.0257383	0.83377	0.00750877	0.634393	0.0110736	0.349739	0.0154995
C1QBP	0.438138	-0.0122761	0.76884	0.0066915	2.73599e-120	0.24284	0.00112944	-0.0403047	6.82505e-07	-0.0580033	4.77064e-10	0.0709092	0.884269	-0.0061908	0.892151	0.00629384	4.12663e-11	0.0746695	2.06259e-25	-0.112895
RPAIN	0.00654647	0.0328999	0.700969	0.00794574	1	0.00193334	0.762824	0.0089256	0.337181	0.0176399	0.908094	-0.00628049	1	0.00281713	0.321057	0.0177397	1	0.00163422	0.114065	0.0223673
6330403K07RIK	0.16682	-0.0190027	7.39139e-96	-0.217439	3.48702e-68	-0.183675	1.84282e-12	0.0784839	9.6891e-83	0.203047	1.92163e-05	-0.0513328	1.75127e-09	-0.0684223	0.00100294	0.0414445	0.51554	0.0134006	0.000237794	-0.0438933
SLC13A3	0.498879	0.0110791	0.00446801	-0.0347908	0.710993	0.00760151	1.33509e-10	0.0721738	0.000510663	-0.043191	0.00241466	-0.0389513	0.886426	0.0061296	0.670388	-0.01068	0.620907	-0.0113357	0.941565	0.00455975
KCNAB3	0.69561	0.00757463	0.257534	0.016942	0.578597	0.00978309	0.262521	-0.018623	0.923008	0.00631872	0.0936342	-0.0252554	0.101811	0.0246334	0.11015	-0.0242828	0.641702	0.01094	0.343405	-0.0156356
CHD3	3.07357e-126	0.248559	5.219e-57	0.168227	0.913812	-0.00398874	2.76385e-42	-0.14549	5.56177e-54	-0.164521	0.628363	0.012016	0.228713	0.0199693	0.0014454	-0.0403479	0.731742	0.00913671	7.48711e-06	-0.0521428
KDM6B	7.41863e-10	-0.0680838	2.80598e-08	0.0623876	1.54331e-15	-0.0863755	0.203571	-0.0202128	1	1.0331e-05	0.413437	-0.0160286	0.71216	-0.00970642	0.055303	-0.0276005	0.0276753	0.0306076	0.0325447	0.0281566
1700125H20RIK	0.523077	-0.0106562	0.860208	0.00501756	0.955937	-0.00315608	0.986002	-0.00405518	0.913657	0.00649977	0.917688	-0.00605009	0.935914	-0.00503206	1	-0.0013389	1	-0.00145164	1	0.00284858
APPBP2	0.582816	-0.00957086	0.551554	-0.0106684	0.131605	-0.0199158	0.911342	0.0059078	0.683304	-0.0110109	0.777386	0.00911315	0.567278	-0.0124871	1	-0.00196484	1	-0.00241339	0.573543	0.0112288
WNT9B	2.364e-30	0.12241	1.49209e-40	-0.141936	0.115384	0.0206094	1.37414e-260	0.351883	3.67417e-53	-0.163283	6.12569e-30	-0.123127	0.0142346	-0.0328793	0.222928	0.0202282	0.8533	0.00659927	0.00970645	0.0327656
ADORA2B	0.0064122	-0.0329695	1.04209e-05	0.0507132	0.00218249	0.0358683	0.83395	0.0075786	1	-0.00249409	0.923512	-0.00589825	0.0184416	0.0319376	0.00874502	-0.0346596	0.88854	-0.0058143	0.524315	-0.0121207
NCOR1	0.893103	0.0042453	0.0112531	-0.0316634	0.438016	0.0122349	0.159942	-0.0216076	1	-0.0010721	0.608007	-0.0123955	1	0.000510094	0.218422	-0.0203562	1	-0.00211472	1	-0.000626768
TRPV2	0.911195	0.00392192	1	-0.00182028	0.174746	0.0183689	0.619706	-0.0115258	1	0.00100574	0.954395	-0.00511706	0.794644	-0.00804489	1	-0.00287608	0.82675	-0.00718059	0.652959	0.00986375
CENPV	9.1214e-36	-0.133028	0.585495	-0.0100544	0.0322867	0.0264283	1.60203e-09	0.0682204	1	-0.00238803	2.14994e-07	0.0604639	0.625487	-0.0113423	6.90578e-08	0.0623954	0.000898684	0.0418369	1.84661e-37	-0.137138
PCGF2	0.000641737	-0.0400129	0.0520656	-0.0255969	0.829184	0.00554101	0.0379425	-0.0284718	1	-0.00136358	0.906182	0.00632576	0.782754	-0.00829358	0.636638	-0.011318	0.554334	-0.0126513	0.700499	-0.00902
CWC25	1.60298e-06	-0.0541277	1	0.00180113	0.891425	0.00442171	0.0505916	0.0272501	0.420563	0.0159211	0.935805	0.00555882	0.517959	-0.0134162	0.368732	-0.0166419	0.186489	0.0213492	0.889322	0.00569176
1700001P01RIK	1	0.00114326	0.288188	-0.0161587	0.540498	0.0104238	1	0.0010447	0.682565	-0.011025	0.906756	0.00630442	0.90162	-0.00579397	0.772705	-0.00868906	0.942684	0.00457901	0.600556	-0.0107662
PIP4K2B	0.631175	0.0087239	0.00117141	0.0388963	1	-0.0018367	0.776951	0.00867046	0.900011	0.00683549	0.971339	-0.00462742	0.52656	0.0132426	0.0111937	-0.0337949	0.941451	0.00460968	0.42371	-0.013977
TRIM37	0.749232	0.00666877	0.917557	-0.00396115	3.96611e-21	0.101426	0.00316227	-0.0372549	0.761822	-0.00949882	0.645066	-0.0117056	0.281725	-0.0185707	0.160846	0.0221805	0.619231	0.011368	8.2311e-09	-0.0652224
YBX2	9.86625e-18	-0.0928936	0.00242818	-0.0367364	0.94539	0.00336639	0.807817	-0.00809126	0.833466	-0.00812234	0.188711	-0.0214947	0.997529	0.00346459	0.932952	0.00526835	1	-7.42444e-05	1	0.00253915
CTDNEP1	0.0681311	0.0236794	0.219559	0.0180042	0.075854	0.0226695	1	-0.00337004	0.190594	0.0214404	0.996827	0.00392131	0.684134	-0.0102361	0.817289	-0.00780395	0.761712	0.00847481	1	-0.00152035
ELP5	0.00104306	-0.0386282	0.0191546	0.0297053	4.37864e-14	0.0820049	0.936222	-0.00526254	1	0.000807086	0.485885	0.0146922	0.142216	-0.0228783	0.811231	0.00792132	0.167094	0.0220271	0.68937	-0.00922636
SLC2A4	0.709763	0.00733966	0.394645	0.0137783	0.0605075	0.02372	0.730361	-0.00952345	0.27547	-0.0190622	0.773039	0.00922339	0.0769311	0.026006	0.604353	-0.0119043	0.8583	0.00649429	0.00304486	0.0365974
GABARAP	1.26844e-22	0.105354	0.0171157	0.03013	8.58334e-47	-0.152166	4.00471e-05	0.0488388	1	0.00343795	0.895267	-0.0065684	0.989192	-0.00367203	0.174189	0.0217317	0.0214719	-0.0315983	2.65468e-20	0.100748
CLDN7	0.000172006	-0.0435248	0.322868	-0.0153539	0.88507	-0.00453936	0.537812	-0.0129354	0.998331	-0.00424063	1	-0.0024815	0.854682	0.00687096	1	0.00325059	0.000139759	-0.0467087	0.127688	0.0217636
2810408A11RIK	0.000574221	-0.0403241	0.893137	0.00440544	1.43634e-17	-0.0921311	0.175537	0.0210789	1	-0.00187786	0.92063	-0.00596674	0.0151313	0.0326641	0.800262	0.00812895	0.402059	-0.0157523	0.489386	-0.0127554
PHF23	0.192654	-0.0181421	0.581097	0.0101362	2.74845e-05	0.0474053	0.0749308	0.0255018	0.344612	0.017492	0.164558	0.0222714	0.216134	-0.0203406	0.504922	-0.0137988	0.0358427	0.0295844	1	0.00184905
ACADVL	1	-0.00109674	0.000234529	0.0433087	0.68276	-0.00805689	0.000588143	0.0421211	1	0.00402664	0.756328	-0.00957322	0.0253244	0.0307593	0.00174517	-0.0397958	0.200682	-0.0208918	4.25867e-06	0.0533543
DNAH11	1	0.000408873	0.30088	0.0158609	1	0.000273303	1	-0.00361858	0.959927	0.00532124	1	0.00345582	0.98161	-0.00391654	0.962264	-0.00453316	1	-0.00197905	0.963975	-0.00407081
G3BP1	0.00471712	0.0339849	0.782721	0.00643271	1.21854e-34	0.130729	0.0852666	-0.0248931	0.29333	-0.0186283	0.165056	0.022253	0.333224	0.0173231	0.374991	0.0164921	0.00275	0.0385897	4.39412e-11	-0.0736764
ATOX1	0.772863	0.00626875	0.739166	-0.00725171	1.0921e-27	0.116621	1	-0.00139171	0.778484	0.00921862	0.141143	0.0231473	0.733111	0.0093104	0.509277	-0.0136945	5.27248e-05	0.0490669	0.615385	0.010513
GLRA2	0.161865	-0.0191812	0.0657524	-0.0245424	0.643584	-0.00869536	0.897279	0.00617496	0.531485	-0.0137575	0.620291	-0.0121716	0.333889	0.0173098	1	0.00198546	0.0790941	-0.0260235	1	0.0029517
SPARC	7.98353e-11	0.0716173	1.06142e-264	-0.354171	2.75037e-103	-0.225434	3.12737e-07	-0.0589314	0.000174026	0.0459644	9.5233e-46	-0.152037	0.115025	0.0240299	0.961536	-0.00455335	1.26674e-15	-0.0888461	4.15024e-08	0.0623798
MIEF2	0.960346	-0.00307255	0.164482	0.0197699	0.675313	0.00817899	0.698188	0.0101049	0.84612	-0.007876	1	-0.00349481	0.875293	-0.00641071	0.307911	-0.0180545	0.605801	-0.0116414	0.692684	0.00915461
TBX3	0.0011977	-0.0382209	0.00555349	-0.034074	1	-0.00130016	0.133789	0.0226028	0.570713	-0.0130204	1	-0.00103586	0.138255	0.0230322	0.00246666	0.0387632	0.674113	0.0102875	0.00231233	0.0374565
MMP7	1		1		1		1		1		1		1		1		1		1
CRHR1	0.0075171	0.032431	0.645277	0.00895619	0.615295	0.00916233	0.581317	-0.0121878	0.569705	-0.0130393	0.199415	0.0211669	0.00230387	0.0388163	0.153974	-0.0224322	0.273326	0.0188291	0.916816	-0.00514397
DUSP14	4.71311e-12	-0.0758599	4.75694e-12	0.07627	3.11728e-08	0.0612093	5.48509e-06	0.0532103	0.153761	0.0226773	0.709147	0.0104628	0.213779	-0.020408	1	-0.00222717	0.841712	0.00684273	1	0.000702184
TADA2A	0.0224615	-0.0284087	0.343556	0.014883	5.25695e-08	0.0602623	0.248222	-0.0189895	0.456743	0.0151683	0.478594	0.0148366	0.837654	-0.00718652	0.717458	-0.00973556	0.0424008	0.0288556	3.17492e-05	-0.0488807
IKZF1	1	0.00189404	1.54465e-05	-0.0498423	0.938695	0.00348289	1	-0.00218835	0.271503	-0.0191646	0.959571	-0.00497517	0.815855	0.00765524	0.960545	0.0045775	0.979848	-0.00364252	0.0237972	-0.0294248
PNPO	0.0742064	0.0232686	0.713968	0.00769742	0.00120598	0.0376366	0.0243419	-0.0302234	0.175428	-0.0219453	0.66105	-0.0113912	0.984139	-0.0038645	0.155926	-0.02235	0.22791	-0.0200728	0.00663645	0.0340767
COG1	0.53791	-0.0103705	0.804196	-0.00605657	0.386094	-0.0132437	1	0.00166566	0.354088	0.0172777	0.703554	0.0105574	1	-0.00316266	0.761382	-0.00887762	0.242308	-0.0196608	0.0956385	0.0232832
CBX1	3.45982e-28	0.117899	3.25032e-08	0.0621256	3.08515e-22	0.104158	1.42234e-17	-0.0935559	0.661118	0.0113985	0.00653349	-0.0358486	0.908769	-0.00563247	1	-0.0013733	1	0.000596682	0.685333	0.00931108
CDK5RAP3	3.18631e-33	0.128154	0.00508464	0.0343675	1.10971e-10	0.0706834	3.42402e-13	-0.0808166	1	-0.00171239	1	-0.00153204	1	0.00286058	0.0669949	-0.026746	0.677403	0.010197	0.432619	0.0138042
COPZ2	3.75449e-63	0.176818	2.2485e-05	0.0490093	1.22473e-32	-0.126828	0.00330308	-0.0371242	0.459785	0.0151182	0.148541	-0.0228678	1	-0.00334066	0.131304	-0.0233372	0.0106842	-0.0341821	0.00416226	0.0356162
SLC25A39	8.20866e-08	-0.0599229	4.06106e-09	0.0657532	0.00644318	0.0323913	0.370386	-0.0161704	0.688937	-0.010901	0.175443	0.0219079	0.455771	-0.0147036	0.900702	0.00607526	0.0257128	0.030892	0.812749	0.00704408
SP2	1	-0.00205494	0.13964	0.0206999	0.678418	0.0081293	0.938935	-0.00519918	0.111256	0.0244217	0.639897	0.0118183	0.869857	0.00656669	0.90999	-0.00587835	1	-0.000685463	1	-0.00185258
AATF	0.828583	-0.00532647	2.21064e-05	-0.0490495	5.24199e-41	0.142394	0.213075	-0.0199268	0.348502	-0.0174053	3.67976e-07	0.0594457	0.902408	-0.0057708	0.177039	-0.0216339	0.0737302	0.0263763	6.21662e-12	-0.0765824
LHX1	0.0727624	0.0233666	0.00228399	-0.0369203	0.608808	0.00926891	9.75831e-10	0.0690334	0.472407	-0.0148833	1	0.003087	0.256276	-0.0192133	0.553317	0.012841	0.885642	0.00588057	0.015119	0.0311534
DYNC1H1	7.29475e-08	0.0601429	0.000141111	-0.0446036	3.01351e-30	-0.122003	0.16401	0.0214672	0.42157	0.0159002	1	0.000971072	0.762501	0.00872177	0.0128384	0.0333069	0.0191	-0.0320591	1.37561e-06	0.0557216
CPSF4L	0.367743	0.0137236	0.160975	0.019895	1.76032e-08	-0.0622347	0.843348	0.00736864	0.904146	0.00674052	1	-0.00222267	1	0.000936807	0.44184	-0.0150252	1	-0.00297257	1	0.00179946
PEX12	0.423039	0.0125864	0.000873797	0.0397422	0.00627824	0.0324798	0.0719058	-0.0256857	0.584157	-0.0127574	0.965434	-0.00481096	1	-0.00218103	0.346053	-0.0171726	0.395927	-0.0158733	0.997245	-0.00327697
NDEL1	0.00171759	0.0371464	0.933886	0.00364559	0.723603	-0.00739111	1	0.00250546	0.837917	0.00802983	0.127232	0.023704	0.844522	-0.00704971	0.501246	0.0138606	0.647085	-0.0108403	0.907857	0.00532448
SLC25A35	0.751203	-0.00663079	0.82051	-0.005764	0.124459	0.020212	0.912963	-0.00586048	0.493529	0.0144991	0.669853	0.0112153	0.926448	-0.00523327	0.842121	0.00732835	0.575458	0.0122174	0.9731	-0.00381589
ZBTB4	2.66021e-11	-0.0732894	0.649797	-0.008871	0.00815081	-0.031584	0.720933	0.00971192	0.762022	0.00949414	0.394298	0.0164251	0.999258	-0.0034098	0.599718	0.011987	0.834411	-0.00701978	0.0126611	0.0318156
TNFSFM13	0.167334	-0.018986	0.804505	-0.00605205	0.62724	-0.0089547	0.913822	-0.0058315	0.994753	-0.00437809	0.8943	-0.00661307	0.868196	0.0065925	1	-0.00188984	0.970941	-0.00384697	1	0.000102601
MPDU1	0.0445354	-0.0256	1	-6.71722e-05	0.0835653	-0.0222146	1	-0.00360454	0.0461993	0.028509	0.55613	0.0134072	0.88049	0.00629542	0.463974	-0.0146083	0.0361313	-0.0295493	0.150465	0.0208821
FXR2	0.0119368	-0.0307884	0.115904	0.0217144	0.0816102	-0.0223258	0.975818	-0.00433482	0.128282	0.0236634	0.127915	0.0236736	0.151618	-0.0225281	0.451847	0.0148457	0.943822	0.00455247	0.970623	0.0038779
ATP5G3	0.000280941	-0.0422531	1.72748e-12	0.0777167	2.37067e-06	0.0528161	0.0182067	0.0313177	0.103816	0.0247791	0.316138	-0.0181368	1	-0.00317634	1	0.00238783	0.573522	0.0122528	0.321696	0.0161147
CD68	0.533342	0.0104516	0.93212	-0.00368529	0.195647	-0.0177289	1	-0.000639119	0.411222	-0.0161129	0.973621	-0.00455561	1	8.18337e-05	1	0.0016598	1	-0.00202547	0.694955	0.00910387
SLC35G3	0.522908	0.0106595	0.830537	0.00556265	0.810613	0.00587534	0.904165	-0.00605153	0.915494	-0.00646302	0.665648	0.0113045	0.96692	-0.00428085	1	0.00333519	0.866558	-0.00631201	1	-6.38622e-05
ACSL1	0.00144568	0.0376598	0.0182184	0.0299022	0.0201602	0.0282944	0.015324	0.0319659	0.923798	0.00629152	0.0560899	0.0276768	0.464113	-0.0145347	0.966237	0.00443561	1	-0.00137944	0.184554	0.0196827
ABCA5	0.383241	-0.0134066	6.0655e-07	0.0566176	1	-0.00187705	0.861613	0.00697712	0.346275	-0.0174568	0.055208	-0.0277441	0.137423	0.0230738	4.94928e-07	-0.0587028	0.264609	0.0190481	0.0163002	0.0308646
SMYD4	0.00256002	0.0359363	1	-0.000188651	1	0.00118025	0.564699	-0.0124501	0.698922	0.0107261	0.00054018	-0.0431958	0.477432	0.014253	0.934872	0.00522186	1	0.00147539	1	-0.000636291
LSP1	0.603107	-0.00920172	2.24108e-18	0.0950033	0.411079	0.0127486	0.387126	-0.0158248	0.495196	-0.0144692	0.0149128	-0.0329802	0.1687	0.0219023	0.00240875	-0.0388375	0.00352035	0.0378191	1	0.00122713
ZFYVE27	0.522908	0.0106596	0.174758	-0.0194117	0.0617156	-0.0236282	0.829676	0.00767087	0.846264	-0.00787351	0.718622	-0.010288	1	0.00177161	0.840099	0.00736671	0.553765	0.0126653	0.549855	-0.0116482
AVPI1	1.40598e-08	-0.0631038	0.594976	-0.00989743	0.0447413	0.0250612	0.781796	0.00857955	0.874609	-0.00731603	0.0343393	0.0297504	0.0722455	-0.0262981	0.869951	-0.00673494	0.0227701	0.0313735	0.0650021	0.0251431
SFRP5	1.03035e-21	0.103151	1.52893e-27	-0.116781	0.00033013	0.0412321	7.41824e-17	0.0915943	0.716516	-0.0104049	5.47032e-43	0.147419	2.40852e-08	0.0639924	0.22553	-0.0201521	1.19245e-17	0.0945565	1.01106e-26	0.115783
MYH11	0.993079	-0.00246545	0.744289	0.00715453	0.747196	0.00697451	0.902757	-0.00607742	0.980149	0.00479166	0.139065	-0.0232196	0.0102591	0.0340371	0.899119	-0.00611436	0.938309	-0.00467271	1	-0.00208433
RAD51D	1	-0.000437823	0.0285775	0.0281433	0.00337623	0.0344975	0.461298	-0.0143332	0.690675	0.0108733	0.893711	-0.00662663	0.439035	-0.015022	0.0959749	-0.0249913	0.0794625	-0.0259994	1	0.000497965
FNDC8	0.415802	0.0127352	0.469523	0.0122906	0.809219	0.0059078	1	0.00199666	0.638866	-0.0117695	0.683893	-0.0109326	1	0.0025369	0.953672	-0.00474019	0.911189	0.00531746	0.99422	-0.00333136
UNC45B	0.567873	0.00984035	0.353259	-0.0146598	0.752266	-0.00687613	0.903365	-0.00606435	0.455441	-0.0151928	1	0.00351047	0.876726	-0.00638264	0.1323	0.0232875	0.824824	0.00721044	1	-0.00154969
PANK3	0.0546429	-0.024704	0.83928	-0.00539368	0.891582	-0.00441624	0.849115	-0.00723102	0.875982	0.00728032	0.467185	0.0150471	1	0.0010923	1	-0.00295135	1	-0.000847682	0.0378581	-0.0275191
RARS	0.48808	-0.011286	0.265819	0.0167166	1.3401e-19	0.0975461	0.656963	0.0108719	0.903844	0.0067496	0.4122	0.0160574	0.00398971	0.0371097	1	-0.0028778	0.906738	0.00541954	4.72912e-06	-0.0531307
WWC1	1.48619e-12	0.0775225	3.11523e-123	0.245806	9.6105e-14	0.0809326	0.0787287	-0.0252713	0.00806706	-0.0350873	0.305167	-0.01837	5.40826e-10	0.070305	0.000179372	-0.0459915	0.313863	-0.0177792	1.75411e-20	-0.101211
MRPL58	0.134027	0.0202511	0.468848	0.0123128	1.55381e-13	0.0802717	0.00517537	-0.0356858	0.447037	-0.0153554	0.308415	0.0182988	0.00252125	-0.0385338	0.89348	-0.00626754	0.640444	-0.0109633	0.671316	-0.00956357
FDXR	0.00333532	-0.0351056	0.00329141	0.0357767	0.0201558	0.0282956	0.0406307	-0.0281895	0.951615	-0.00559805	0.802354	-0.00860736	1	0.000249952	0.709254	-0.00989219	0.395057	0.0158903	0.907663	0.00534038
OTOP3	1.19315e-10	-0.0709873	0.579944	0.0101593	0.0398151	-0.0255558	0.0365415	0.0286305	0.0792084	0.0260897	0.0177854	0.0322958	0.000429251	-0.0435321	0.0269817	0.0305757	0.000128622	0.0469122	0.697487	-0.00906887
SULT4A1	9.51355e-21	-0.100772	0.0125718	-0.0312691	0.0131459	0.0298914	0.981068	-0.00420212	0.212916	-0.0207732	0.663222	0.0113473	0.000819343	-0.0417722	0.321952	0.017709	0.235473	0.0198551	0.822808	-0.00687916
MRPL45	0.570168	-0.00979675	1	-0.000551813	0.607098	0.00929653	1	0.00332743	1	-0.000672391	0.475607	0.0148879	0.726527	-0.00942973	0.0687822	-0.0266131	0.25506	0.0193144	0.756674	-0.00800598
MB	0.994657	0.00243135	0.441734	-0.0128284	0.530995	-0.0105872	0.639988	-0.0111721	0.816879	0.00851485	0.981617	-0.00433168	0.219953	-0.0202245	0.952638	-0.00476777	0.25068	-0.0194291	0.679094	0.00941512
IRF1	0.00040342	-0.0412857	1	0.00107363	7.68441e-09	-0.0636978	0.00280727	0.0376303	0.980091	-0.00480077	0.485915	-0.0146895	0.0477314	0.0281669	0.00898275	0.0345621	0.82203	-0.00728618	0.27463	0.0172224
SLC22A5	0.198797	0.0179486	0.674705	0.00841738	0.220107	-0.0170192	0.868244	0.00679389	1	-0.00338037	0.775702	-0.00916275	0.976672	-0.004033	0.760313	-0.00890643	0.700356	-0.00978062	0.44568	0.0135633
P4HA2	0.673218	-0.00796728	4.82644e-08	0.0614128	0.164862	0.0186948	0.0614469	0.026404	1	-0.000182141	0.0185834	-0.032119	0.229781	0.0199375	0.274964	-0.0188666	0.08655	0.0255979	0.00228193	-0.0375011
ARRB1	0.240906	-0.0167106	0.207135	-0.0183758	0.0237436	0.0276554	0.141843	-0.0222926	1	-0.00294489	2.70377e-05	-0.0505483	1	0.00154942	0.732567	0.00945113	0.00335772	-0.0379631	0.139206	0.0213074
CSF2	0.776148	-0.00621475	0.500856	0.0116807	0.695449	0.00785295	0.657374	0.010866	0.775423	0.00927238	0.531849	0.0138514	0.259338	-0.0191291	0.5342	0.0132255	1	0.0026777	0.997245	-0.00327513
TM4SF5	3.65167e-05	-0.0473124	0.029696	-0.0279838	0.314387	-0.0147207	0.245879	0.0190453	0.696716	-0.0107656	0.581699	-0.0128973	0.115685	0.0239956	0.922556	-0.00558383	0.0126783	-0.0335694	0.593603	0.0108879
CXCL16	0.0301073	-0.0272504	0.114369	-0.0217866	0.943114	-0.00341174	0.959319	-0.00472302	1	-0.00201106	0.967574	-0.00474202	0.0821444	0.0256963	1	0.00200973	0.881939	-0.00599502	0.453723	0.0134169
PELP1	0.0319305	-0.0270076	0.891443	-0.00444737	3.50524e-07	0.0566816	0.519799	-0.0132536	0.793908	-0.00894089	0.121867	0.0239283	0.695764	0.0100223	0.959946	-0.00459595	0.118726	0.023971	0.000509488	-0.0418714
MED11	0.2138	-0.0174845	0.247631	0.017211	2.0297e-06	0.0531407	0.723961	0.00965546	0.601911	-0.0124454	0.724581	0.0101896	0.478784	0.0142272	0.174478	-0.0217219	0.375131	0.0163463	1	0.000992482
ALOX15	0.889717	0.00430578	0.18669	0.0190059	0.433375	0.0123218	1	0.00258014	1	0.000159934	0.632721	0.0119477	0.771645	0.00850224	0.917495	-0.00570628	0.297294	0.0182021	0.848475	-0.00641819
CCL6	0.930125	0.00361056	1	0.00222148	0.750583	-0.00691066	0.841307	-0.00741263	0.945832	-0.00575927	1	-0.0034353	0.862735	-0.00671427	0.944831	-0.00498205	1	0.00174814	0.947093	0.00445651
CCL4	0.46869	0.0116787	0.915312	0.00400813	1	0.000457709	0.439835	-0.0147439	0.630964	-0.0118969	0.802354	-0.0086162	0.8867	-0.00611418	0.993546	0.00375001	1	0.00129321	1	0.00115333
NATD1	1	0.00181138	0.0850744	-0.0233026	0.174631	-0.0183747	0.667873	0.0106826	0.0425861	0.0288509	0.00584404	-0.0362145	0.315019	0.0177504	0.548778	-0.0129378	0.395304	-0.0158847	0.000570807	0.0415509
MAP2K3	0.785822	0.00603965	0.006339	0.0336363	0.0453205	0.0250065	1	-0.00297556	0.669883	-0.0112401	0.947793	0.00525772	0.831575	-0.00731481	1	0.0021973	0.822918	-0.0072622	0.28242	0.0170195
YWHAH	0.0361638	-0.0265	1	-0.0019489	0.953931	-0.00319562	0.958555	0.00474432	1	0.00250975	0.284139	0.0188707	0.0277337	0.0304115	7.58399e-05	0.0480996	0.837011	-0.00694907	0.3975	0.0144972
HOXB1	9.97784e-232	0.332606	1.24134e-150	-0.270907	1	-0.00165363	0.932471	0.00536942	2.87352e-38	-0.138743	0	0.69078	6.06673e-163	0.281831	7.60957e-18	-0.0948869	0.313688	-0.0177841	2.14783e-15	-0.0873848
SART3	0.66277	-0.00817011	0.455778	0.0125582	2.11996e-05	0.0480053	0.948048	0.00500959	1	0.000446268	0.611916	-0.0123229	1	-0.0031557	0.965055	0.0044695	0.306837	0.017966	0.239407	-0.0181173
E2F2	0.194065	-0.0180964	0.885465	0.00456646	1.66936e-05	0.0485498	0.622698	0.0114756	0.714071	0.0104441	0.720695	0.0102553	0.448312	-0.0148563	0.890416	-0.00634335	0.00945684	0.0346114	0.719915	-0.00867643
SLFN3	0.665112	-0.00811699	1	-0.00190622	0.825682	0.00560431	0.978031	-0.00426833	1	-0.00388879	0.947365	-0.00527201	1	-0.000298516	0.223139	-0.0202231	0.922453	0.00506585	1	-0.000124176
NARS2	1	0.00167867	0.00504833	0.0343926	0.0416385	0.0253669	0.27537	-0.0183034	0.986022	0.00462183	0.540757	0.0136808	0.977737	-0.00400197	0.672515	-0.0106491	0.847389	0.00672053	0.705943	-0.00892498
SLC35B4	3.48531e-05	0.0474245	0.770763	-0.00666088	0.980398	0.00264741	0.13987	-0.022371	1	0.000728988	0.468958	-0.0150137	0.984426	-0.00382595	0.00176496	0.0397626	1	-0.00297918	0.162938	0.0204171
DNAH1	6.77841e-05	0.0458403	5.23021e-14	0.0825283	5.77571e-05	-0.0456408	0.932268	0.00538306	0.388454	0.0165661	0.226606	-0.0203806	0.20863	0.0205555	3.57934e-07	-0.0593346	0.877256	-0.00609385	0.735199	0.00840275
DALRD3	0.0628699	0.0240456	0.00126589	0.0386751	0.902803	-0.00421322	0.0424022	0.0279962	0.0254442	0.0309609	0.805835	-0.00852897	0.297952	0.0181646	0.0179795	-0.0321017	0.25039	-0.0194373	0.133077	-0.0215469
FIS1	0.198773	0.01795	0.13964	-0.0207003	2.51935e-16	-0.088642	1.14993e-06	0.0563996	1	0.00405115	1	-2.77929e-05	0.584272	0.0121571	0.390923	-0.0161188	1	-0.00185007	1.3843e-06	0.0557073
PLOD1	0.599482	0.00927429	0.637334	0.009099	1.01366e-16	-0.089764	1	0.00184479	0.935458	0.00598861	1	0.000148022	0.977594	-0.00400716	0.807438	-0.00799269	1	0.00196093	0.775648	0.00767011
RAB3D	0.00211161	0.0365256	0.0155466	-0.0304922	0.398016	-0.0130129	0.0116846	0.0329446	0.35143	0.0173328	1	-0.0028417	0.965989	0.00429677	0.645642	0.0111376	0.746748	0.00878342	0.00597276	0.0344271
MFSD3	0.668948	-0.00805007	0.698131	0.00799924	0.180152	-0.0181984	1	0.00126934	0.94763	-0.00569194	0.75825	0.00953244	0.781378	-0.00832138	0.168626	-0.0219196	0.943813	0.00455349	0.580017	-0.0111206
SLC25A22	5.82592e-18	-0.0935177	0.131586	-0.0210262	0.232007	0.0166973	0.836257	-0.00754005	1	-0.00168511	0.661865	0.0113723	0.186848	0.0212713	0.492694	0.014016	0.732245	0.00911224	0.00290775	-0.036749
ATP6AP1	0.9002	0.00412125	0.438312	0.0128992	0.360622	-0.013739	1	0.00202731	0.617385	-0.0121611	0.615875	0.0122516	0.484967	-0.0140979	0.84587	0.00724018	0.862964	-0.00638877	0.432606	0.0138057
DNASE1L1	0.806744	0.00568827	0.772845	-0.00662121	3.78386e-10	-0.0687414	0.768905	0.00881663	0.850513	0.00779688	1	-0.00248479	0.123451	-0.0236494	0.118251	-0.0239108	0.805213	-0.00763364	0.000777231	0.0406901
ALDH3A1	0.313284	0.0149243	0.274865	-0.016479	1	0.00181816	1	-0.00293896	0.0195833	0.031967	0.681862	-0.0109703	1	-0.00248397	1	-0.000722677	0.911189	-0.00531338	0.382716	-0.0148006
CCL9	1	0.00147469	0.348599	0.0147726	0.557225	0.0101405	1	0.00232985	1	0.00170694	1	0.00283277	0.7623	-0.00872546	0.793907	0.00828232	0.298951	-0.0181549	0.638016	0.0101092
SCRN1	4.55738e-78	0.196432	2.76502e-13	0.0802727	5.21011e-54	-0.163537	0.909797	0.00595014	1	-0.00267478	1	-0.00305247	0.0816181	-0.0257256	0.00467186	-0.0367405	0.857291	0.00652373	8.16168e-70	0.186665
BC005537	0.0293584	0.0273544	0.780051	0.00648679	0.124867	0.0201936	1	0.00175854	1	0.0022362	0.941657	0.0054283	0.183176	-0.0214013	0.95618	0.00468014	0.664146	-0.0105024	0.117622	0.0222029
ISYNA1	1.35634e-106	-0.228882	0.333355	0.0151125	0.000214202	0.0423714	0.00128233	0.0399244	0.00347891	0.0377346	5.3394e-05	0.0489688	1.89077e-07	-0.0602821	0.32242	-0.0176967	8.00885e-12	0.0771223	0.0351539	-0.0278334
HARS2	0.345451	-0.0142049	0.768839	0.00669351	0.0633726	0.0235075	1	-0.000776836	0.854371	0.00772326	0.791893	0.00883729	1	-0.000665008	1	-0.000735325	0.823937	0.00722428	1	-0.000227792
CACNG2	0.789326	0.00597803	0.523227	-0.0112572	1	0.00133445	0.507263	-0.0134833	0.835502	0.00807886	0.406915	-0.0161721	1	0.00147018	0.875585	-0.00661442	0.734839	-0.00904932	0.515715	-0.0122789
TMEM160	1.73486e-09	-0.0666841	0.0023292	-0.0368625	5.8739e-33	0.127464	0.888947	-0.00638488	0.0246033	-0.0310911	1	-0.00276524	0.0462461	-0.0282986	0.466438	-0.014549	0.000224216	0.0455406	0.40633	-0.0143242
RAB5C	0.0652763	0.0238759	1	0.00196616	0.494478	0.0112353	0.75366	0.00911357	0.241074	-0.0199473	0.765434	-0.0093835	1	-0.000205148	0.794479	-0.00827349	1	0.000302589	1	-0.000463773
STYXL1	1	0.000386633	0.602906	-0.00974177	0.789106	0.00625101	0.485377	-0.0138941	1	-0.0019747	0.966613	-0.00478009	0.383222	-0.0161808	1	0.00223212	0.814803	0.00741858	0.602527	0.0107335
MDH2	1	0.00185731	0.606514	-0.00967816	3.63621e-09	0.0649873	0.716715	0.00978843	1	0.00414863	0.0493664	0.0282323	0.454984	0.0147163	1	-0.00346893	5.7938e-05	0.0488386	0.291641	-0.016798
H13	0.0440624	-0.0256456	0.0789269	0.023669	0.0673905	-0.0232193	0.399435	0.0155788	0.827211	0.0082665	1	0.00223992	0.712225	-0.00970216	1	-0.00151909	0.919721	-0.00511355	0.509635	0.0123865
RNF145	0.0258305	0.0278558	0.418008	0.0133051	4.18502e-05	-0.0464163	0.000888264	-0.040977	0.0778197	0.0261746	0.00019004	-0.0459121	0.252735	0.019302	0.000293171	0.0447334	1	0.00260193	1	-0.00100145
SCN1B	0.276426	-0.0158021	0.00244484	-0.0367125	0.585539	-0.00966366	0.312473	0.0174222	0.196996	0.0212574	0.521849	-0.01403	0.310024	0.0178723	0.652628	0.0109972	1	-0.00230416	1	0.000966399
ATP6V1E1	0.050394	-0.0250596	1	-0.00141889	0.688992	-0.00796034	0.550982	0.0126895	0.838847	0.00801256	0.0106208	0.0341839	0.890842	-0.00603917	1	0.00229822	0.692996	-0.00991977	0.00236796	0.0373847
CHTF18	0.561997	-0.00994118	0.0574899	0.0251588	5.54912e-10	0.0681194	0.250894	-0.0189205	1	0.00404489	0.848271	0.00766172	0.69938	-0.00995996	1	-0.00176779	0.571919	0.0122938	1	0.0030904
LHX9	4.47784e-07	-0.0566916	0.177962	0.0193037	0.000147127	0.0433298	0.132579	0.0226548	0.121926	0.0239294	0.000445406	0.0437098	1.3293e-12	-0.0792422	1	-0.00194563	3.29924e-06	-0.0550907	8.89827e-14	0.0825193
ETNPPL	0.837338	0.00518208	0.0267662	-0.0284003	1	-0.000942915	0.427926	0.0150104	0.959574	0.00533841	0.322026	-0.0180009	0.776577	0.00839652	1	-0.00116525	0.292065	-0.0183406	0.14674	0.0210226
RPS6KL1	2.36819e-09	-0.0661668	1	-0.000305752	0.0181307	0.0286964	0.704829	-0.00998698	0.623426	-0.0120399	0.514394	-0.0141653	0.513032	0.0135091	0.0684788	-0.0266366	0.142401	0.0229795	0.112154	-0.0224644
PPP1R12C	0.526125	0.0105948	0.676021	-0.00839571	0.470839	0.0116454	1	0.00133141	0.558833	0.0132262	1	0.00042411	0.555528	-0.012691	0.89418	-0.00625206	0.0548963	0.027726	0.989753	-0.00341552
AHR	3.68517e-24	-0.108955	0.0640125	-0.0246693	0.842917	-0.00530268	1	-0.000737107	1	0.00129373	0.37724	-0.0167906	0.000253878	0.04491	0.0950847	0.0250342	0.710433	-0.00956995	0.341515	0.0156844
MAP1S	0.00568596	-0.0333685	0.0307543	-0.027842	3.00879e-09	0.0653073	0.0133809	-0.0324704	1	-0.00170354	0.269143	0.0192527	0.676226	-0.01038	0.970534	0.0043204	0.948072	0.0044478	3.78007e-05	-0.0484708
DPEP1	1	0.00149791	0.779457	0.00649751	0.485639	-0.0113929	0.988005	-0.00400024	1	-0.00318395	1	-0.00325121	1	0.00138141	0.32176	0.0177198	0.767848	0.00836938	1	-0.00206915
TMEM129	0.786616	0.00602307	1	0.00161912	0.0850764	0.0221248	1	0.000818535	0.651319	0.0115706	0.789737	0.00887368	0.358566	0.0167185	1	0.000940491	0.950212	0.00440406	0.211823	-0.0188598
NOP9	0.000363979	-0.0415633	0.425173	-0.0131634	1.50293e-26	0.114136	0.352662	-0.0165529	0.986566	0.00461134	0.572979	0.0130688	0.875203	-0.00641648	0.301263	-0.0182092	0.0293957	0.0303785	0.000320199	-0.0431115
HSD17B1	0.510693	0.0108731	0.491142	-0.0118708	1	-0.000583241	0.24168	0.0191484	0.218663	-0.0205962	0.195016	-0.0213026	0.88049	-0.0062956	1	0.00324045	0.950859	-0.00438178	0.720747	-0.00865268
ATP6V0A1	1.93021e-11	0.0737719	0.0133866	-0.0310522	0.424139	-0.0125	4.12283e-25	0.112092	0.700033	-0.0107058	0.0166215	-0.0325723	0.0115617	-0.0336284	0.710092	0.00987579	1	-0.000321899	0.40633	-0.0143252
PSMC3IP	0.508195	0.0109177	0.122481	0.0214155	3.33786e-05	0.0469483	0.682937	-0.0103931	0.91112	0.00658976	0.191907	0.0213964	0.83458	0.00724358	1	-0.000434565	0.0728993	0.0264332	0.370585	-0.0150522
GRB7	6.0634e-09	-0.0645744	0.0345464	0.0273562	0.28315	0.0154344	4.27893e-32	0.126772	0.0367024	-0.0294594	1.34377e-05	-0.0521163	3.98124e-12	0.0776813	0.18386	-0.0214056	0.0214719	-0.0316007	0.805294	0.00717062
NOXO1	0.774999	-0.00623149	1	-0.00214735	0.574436	-0.00985437	0.0569292	0.0267421	1	0.00401317	0.945356	0.00533136	1	0.00254694	0.823575	-0.00767425	0.818573	0.00735461	0.615633	-0.0105079
AOC3	0.603334	0.00919788	0.416756	0.0133314	0.519464	0.0108017	0.926817	-0.005528	0.423155	0.0158663	1	-0.00112854	0.984139	-0.00386276	0.793257	-0.00830635	0.497371	-0.0137722	1	-0.00230074
ZFP687	7.72711e-06	-0.0508235	0.638961	-0.0090743	0.422396	-0.0125324	0.265736	-0.0185382	0.840923	-0.00797804	1	0.000397925	0.583827	-0.0121648	1	-0.00155869	1	0.00291021	0.83859	-0.00660837
GDPD2	5.88015e-15	0.0850188	1.71555e-24	0.110039	6.3379e-06	-0.0507101	0.101757	-0.0240044	0.0698837	-0.0266773	0.888558	-0.00676651	0.0860743	0.0254685	0.000217101	-0.0455022	0.0177727	0.0323229	0.299276	0.0166244
D8ERTD738E	4.69239e-18	-0.0937711	7.65714e-06	0.0513831	1.10074e-16	0.089664	0.0602879	0.0264919	0.153559	0.0226838	0.115244	0.0242342	0.611046	0.0116345	0.981245	0.00407588	0.290416	0.0183805	0.222097	0.0185804
SEC14L4	0.247418	-0.0165332	0.355973	-0.0145971	0.63729	0.00879423	1	-0.00116157	0.745523	0.00984758	1	0.00242105	0.47579	0.0142875	0.841121	-0.00735165	0.13073	-0.0234632	0.262746	0.0175216
CALM3	2.60347e-05	-0.0481048	0.0991808	0.0225374	0.0953721	0.0215704	0.745183	-0.00926871	1	0.000687258	0.692128	-0.0107552	0.731224	0.00934835	0.899119	0.00611751	0.571919	0.0122957	1	0.000256907
COPS3	1	-0.00145894	0.0878705	-0.0231376	4.1757e-09	0.0647489	0.372278	-0.016133	0.216603	-0.020654	0.165028	0.0222559	0.0118226	0.0335479	0.581339	-0.0123325	0.682413	-0.0100996	0.210083	0.018914
FKBP8	1.42002e-05	-0.0494813	0.300978	-0.0158586	0.129333	0.0200091	0.638366	0.0112094	0.833416	0.00812736	0.340356	0.0175703	0.708287	0.00976882	0.19099	-0.0211861	1	-0.000717174	0.243872	0.0180083
FFAR3	1		1		1		1		1		1		1		1		1		1
DDX39B	0.0716903	-0.0234389	0.846041	-0.00527923	0.00240221	0.0355685	0.995372	-0.0038245	1	-0.000853088	1	-0.00292829	0.344393	0.017039	1	-0.00127472	0.381644	0.0161935	0.00218212	-0.0376333
GIPC1	6.15852e-06	0.0513071	0.0144793	0.0307612	0.0363833	-0.0259331	0.21226	0.0199507	0.645145	0.0116673	0.00103928	-0.0414059	0.607766	0.0117036	0.523468	0.0134303	0.113144	0.0242271	0.907477	0.00534455
TLCD1	0.000124216	-0.0443508	0.184439	0.0190826	5.87134e-14	0.0816072	0.899726	0.00613773	0.801068	-0.00880335	0.132552	0.0234686	0.150647	-0.0225623	0.492203	-0.0140362	0.921969	0.00507549	1	-0.00196827
PLSCR3	0.471378	0.0116163	0.000141566	0.0445939	6.76988e-11	-0.0714525	0.029575	0.0294881	0.366412	0.0169952	1	0.000813814	1	0.000397195	0.893575	-0.00626356	0.818051	0.00736593	0.0044412	0.0354037
PTGER1	0.161971	-0.0191771	0.688733	-0.00816487	0.266345	-0.01583	0.447251	0.0146143	0.948092	-0.0056728	0.572505	-0.0130826	1	0.000604171	0.567375	-0.0125991	0.351177	-0.0168975	1	0.00215377
ARHGEF25	3.0688e-16	-0.0887466	1	0.00222221	4.53564e-16	-0.0879116	0.000568395	0.0422144	0.314432	0.0181404	0.2789	0.0190002	4.73237e-09	-0.0667931	0.312361	0.0179485	0.861191	0.00642955	0.970842	0.00387171
XAB2	0.518844	-0.0107279	0.256834	0.0169652	0.108851	0.0209047	1	0.00199995	1	0.00337808	0.713483	-0.0103707	1	0.00282543	0.198735	-0.020942	0.856056	0.00654911	0.845648	-0.00647537
CDC37	0.0240514	0.0281371	9.61046e-06	0.0508884	6.06179e-09	0.0641104	0.835579	0.0075492	0.25722	-0.0195196	0.688151	0.0108243	0.258824	-0.0191484	1	0.00246667	0.00756888	0.0353751	0.00216017	-0.0376667
RAB4A	2.46544e-21	0.102225	0.000300393	-0.0426573	7.28426e-22	-0.103248	0.00694262	0.0347141	6.99608e-07	0.0579542	0.000827457	-0.0420413	0.495284	-0.0138944	0.553287	0.0128426	0.000583462	-0.0430291	9.03752e-11	-0.0725881
TRIP10	4.76212e-36	-0.133557	0.00217661	-0.0370679	9.25466e-13	0.0777829	0.682793	0.0103972	0.928772	-0.00615043	0.00139715	0.040557	0.160625	-0.0221881	0.592201	0.0121392	0.094989	0.0251463	0.701457	-0.00900067
CD70	1	0.000176698	1	0.00226327	0.648909	-0.00860592	0.932646	0.0053547	0.305444	0.0183527	1	0.00168168	0.865458	-0.0066636	0.681259	0.0104695	1	0.00221914	0.71394	0.00878143
COPS6	0.000119804	-0.0444399	0.685062	0.00823207	0.941651	-0.00343676	0.00335551	0.0370764	0.17714	0.0218714	0.898513	-0.00650088	1	0.00288352	0.168832	-0.0219108	0.258034	-0.0192189	1.56668e-07	0.0599284
UBB	3.5773e-06	-0.052466	1	-0.000149415	4.4037e-15	-0.0850299	0.0413647	-0.0281059	0.271295	0.0191713	0.868535	0.00718216	1	-0.00259956	0.571813	-0.012521	0.73671	-0.00900359	0.0176981	0.0305602
AP4M1	0.00402713	0.0344965	1	-0.00146157	0.911646	0.00403484	0.484967	-0.0139025	1	0.00367619	0.763191	-0.00942396	0.772104	0.00848792	0.979888	0.00412222	0.70471	-0.00969275	0.0849655	0.0238593
GYG	0.00696543	-0.0326888	9.0257e-09	0.0643886	0.000264233	-0.0418195	0.000246735	0.0444375	0.00110618	0.0410898	0.0108764	0.0341015	3.50651e-08	-0.0633332	0.950875	0.00481634	0.628534	-0.011193	0.000694194	-0.0410005
[truncated: 19,728 more rows]
