# Supplementary material for: A single-cell atlas of spatial and temporal gene expression in the mouse cranial neural plate
Source: bioRxiv preprint, doi:10.1101/2024.08.25.609458, version 3 (2025-03-06)
Supplement: Table S6 [file 609458_file10.xlsx]

## Sheet: Sheet1
Gene	C, MSD	Z, MSD	Pval, MSD	FDR, MSD	Range	Patterned	C, A-P	Z, A-P	Pval, A-P	FDR, A-P	C, M-L	Z, M-L	Pval, M-L	FDR, M-L	2D Cluster	2D Cluster, D=1	2D Cluster, D=2	2D Cluster, D=3	2D Cluster, D=4	2D Cluster, D=5	2D Cluster, D=6	2D Cluster, D=7	2D Cluster, D=8	2D Cluster, D=9	2D Cluster, D=10	A-P Axis Cluster	M-L Axis Cluster
SIX3	0.964283	386.807	0	0	4.2658	TRUE	0.869151	325.09	0	0	0.0592118	22.1498	5.23831e-109	9.51771e-107	6	851	157	7	34	34	16	16	16	6	6	7	3
TGFB2	0.921009	384.73	0	0	3.41423	TRUE	0.0679422	25.8299	2.04452e-147	2.08956e-145	0.887789	339.132	0	0	9	1	113	113	27	25	25	25	9	9	9	2	6
SHH	0.91671	383.457	0	0	3.16043	TRUE	0.0613141	23.3633	5.0496e-121	4.76387e-119	0.884705	338.587	0	0	9	1	113	113	27	25	25	25	9	9	9	0	6
HOXB2	0.944197	358.729	0	0	3.14398	TRUE	0.720218	253.418	0	0	0.0392624	13.7827	1.62054e-43	1.49295e-41	10	800	114	89	18	4	9	9	4	4	10	4	5
LHX2	0.961646	354.632	0	0	3.30299	TRUE	0.849616	291.025	0	0	0.0484716	16.5975	3.63044e-62	4.31759e-60	6	857	157	7	34	34	16	16	16	6	6	7	3
EN1	0.945886	349.868	0	0	3.89315	TRUE	0.829286	283.915	0	0	0.115182	39.4174	0	0	11	547	273	79	39	39	2	11	11	11	11	3	1
MAFB	0.915688	325.276	0	0	3.6134	TRUE	0.27103	87.0179	0	0	0.0140475	4.51212	3.20914e-06	9.34316e-05	10	7	267	66	66	11	11	24	4	4	10	4
RAX	0.955413	313.737	0	0	3.01931	TRUE	0.831372	253.12	0	0	0.0675686	20.5622	2.99384e-94	4.77627e-92	6	559	157	7	34	34	16	16	16	6	6	7	3
FST	0.950028	304.814	0	0	4.42926	TRUE	0.793762	237.052	0	0	0.30899	92.017	0	0	0	483	241	0	7	15	15	2	13	0	0	6	3
EGR2	0.917753	301.901	0	0	2.53075	TRUE	0.547149	164.497	0	0	0.0403684	12.1199	4.14414e-34	3.36035e-32	10	775	161	26	53	4	9	9	4	4	10	4	3
FOXA2	0.936913	292.74	0	0	2.69968	TRUE	0.0660503	19.1164	9.22789e-82	7.10113e-80	0.910793	264.815	0	0	9	841	127	15	31	25	25	25	9	9	9	5	5
VGLL3	0.91726	277.532	0	0	3.33742	TRUE	0.571861	159.986	0	0	0.365093	101.812	0	0	0	820	13	0	7	15	15	2	13	0	0	6	3
HESX1	0.946888	271.58	0	0	2.89551	TRUE	0.722747	193.455	0	0	0.121594	32.5619	7.10116e-233	2.28436e-230	6	861	251	7	34	34	16	16	16	6	6	7	3
FOXA1	0.923698	268.943	0	0	2.17772	TRUE	0.0788901	20.9452	1.03749e-97	8.85162e-96	0.895635	238.785	0	0	9	1	113	113	27	25	25	25	9	9	9	8	6
HOXA2	0.941963	264.571	0	0	2.63235	TRUE	0.742311	193.046	0	0	0.0690251	17.9022	5.67265e-72	7.42096e-70	10	817	114	89	18	4	9	9	4	4	10	4	4
SHISA2	0.958943	244.415	0	0	2.81308	TRUE	0.870005	206.205	0	0	0.0342045	8.10649	2.60513e-16	1.27801e-14	6	2	157	7	34	34	16	16	16	6	6	7
CALCA	0.923999	231.621	0	0	2.98156	TRUE	0.063122	14.2787	1.48576e-46	8.57501e-45	0.872438	198.292	0	0	9	858	113	113	27	25	25	25	9	9	9	0	6
CRABP1	0.944979	216.327	0	0	5.67886	TRUE	0.864376	184.682	0	0	0.144778	30.8999	5.98675e-210	1.70258e-207	7	461	230	13	0	22	22	22	0	7	7	6	2
FZD5	0.926727	207.695	0	0	2.47038	TRUE	0.707778	147.499	0	0	0.0805325	16.8033	1.15339e-63	1.38852e-61	6	607	251	7	34	34	16	16	16	6	6	2	3
FEZF1	0.95421	204.834	0	0	2.31424	TRUE	0.8899	178.267	0	0	0.0460361	9.2233	1.44049e-20	8.59171e-19	6	2	157	7	34	34	16	16	16	6	6	7
NKX2-9	0.905593	196.13	0	0	3.29807	TRUE	0.0532706	10.9403	3.69765e-28	1.5947e-26	0.857526	176.87	0	0	9	498	127	15	31	25	25	25	9	9	9	0	4
FAM181B	0.937082	191.636	0	0	3.86416	TRUE	0.759844	144.097	0	0	0.111903	21.204	4.38404e-100	7.6131e-98	11	831	207	20	42	17	2	11	11	11	11	9	2
IRS4	0.928925	189.184	0	0	2.99726	TRUE	0.894513	170.776	0	0	0.0475634	9.08564	5.15436e-20	3.01024e-18	6	806	22	93	46	46	16	16	16	6	6	0
FOXD1	0.905107	185.525	0	0	3.16292	TRUE	0.640623	124.113	0	0	0.189124	36.6878	5.70697e-295	2.33308e-292	3	548	153	92	17	35	1	7	7	3	3	0	3
PAX6	0.93728	184.498	0	0	3.27744	TRUE	0.746718	136.111	0	0	0.0810913	14.7905	8.43924e-50	8.62517e-48	3	583	291	72	2	27	1	7	7	3	3	2	3
PDE11A	0.905067	181.895	0	0	1.71144	TRUE	0.244923	43.9977	0	0	0.0183746	3.30431	0.00047605	0.0102994	10	7	267	66	66	11	11	24	4	4	10	4
HOPX	0.961136	177.999	0	0	2.32307	TRUE	0.846065	145.731	0	0	0.0504739	8.69269	1.76974e-18	9.56683e-17	6	528	157	7	34	34	16	16	16	6	6	7
OTX2	0.938343	176.045	0	0	3.36746	TRUE	0.900215	157.869	0	0	0.188847	33.1067	1.18994e-240	4.02589e-238	3	847	211	105	38	38	4	10	21	3	3	8	1
ERAS	0.958244	175.696	0	0	2.4817	TRUE	0.885484	151.158	0	0	0.0518501	8.84565	4.54993e-19	2.52927e-17	6	836	22	93	46	46	16	16	16	6	6	0
IRX3	0.955559	174.326	0	0	2.95019	TRUE	0.891048	151.501	0	0	0.0759597	12.9139	1.87854e-38	1.64566e-36	7	3	299	13	0	22	22	22	0	7	7	1	2
EN2	0.916996	171.745	0	0	2.72325	TRUE	0.688834	119.397	0	0	0.144741	25.1093	1.97031e-139	4.29594e-137	11	862	218	79	39	39	2	11	11	11	11	3	2
SIX6	0.890821	167.781	0	0	2.96536	TRUE	0.4998	88.7996	0	0	0.0910867	16.226	1.65132e-59	1.91739e-57	6	839	201	100	1	20	20	20	20	6	6	2	3
COBL	0.926956	166.858	0	0	1.6995	TRUE	0.0562728	9.22357	1.43681e-20	5.11699e-19	0.904364	149.159	0	0	9	0	113	113	27	25	25	25	9	9	9		6
MAF	0.906823	159.646	0	0	3.02945	TRUE	0.524298	86.6912	0	0	0.0849885	14.0959	2.01349e-45	1.88146e-43	6	458	201	100	1	20	20	20	20	6	6	2	3
PAX5	0.899743	158.524	0	0	2.72433	TRUE	0.687713	111.912	0	0	0.0981736	15.9935	7.08713e-58	7.90175e-56	11	828	218	79	39	39	2	11	11	11	11	3	2
ALDH1A2	0.934059	155.171	0	0	2.26409	TRUE	0.732545	112.046	0	0	0.0585872	8.95147	1.75389e-19	9.947e-18	6	433	210	76	1	20	20	20	20	6	6	7
NKX2-1	0.89416	152.798	0	0	2.35484	TRUE	0.194825	31.4858	6.80123e-218	8.83845e-216	0.542478	88.2879	0	0	9	834	123	61	61	14	14	14	9	9	9	7	3
9030622O22RIK	0.936695	149.213	0	0	1.31924	TRUE	0.0683588	9.9397	1.39836e-23	5.40157e-22	0.908346	132.718	0	0	9	0	113	113	27	25	25	25	9	9	9		6
HOXB1	0.909701	147.886	0	0	2.58819	TRUE	0.518624	78.2626	0	0	0.0813835	12.2165	1.26963e-34	1.03808e-32	10	776	60	2	28	11	11	24	4	4	10	10	4
EMX2	0.909465	147.122	0	0	2.42424	TRUE	0.646954	98.6318	0	0	0.107606	16.427	6.12719e-61	7.24301e-59	3	582	56	114	2	27	1	7	7	3	3	0	2
IRX5	0.952587	146.912	0	0	2.69303	TRUE	0.874194	125.735	0	0	0.100355	14.425	1.80126e-47	1.77618e-45	7	3	299	13	0	22	22	22	0	7	7	1	2
NKX6-1	0.922532	146.534	0	0	2.9413	TRUE	0.179509	26.6116	2.49356e-156	2.68853e-154	0.743754	110.663	0	0	1	731	182	94	33	33	33	3	3	16	1	1	5
PCSK1N	0.937836	143.687	0	0	3.08794	TRUE	0.893341	127.76	0	0	0.0562544	8.0366	4.61812e-16	2.2431e-14	6	539	22	93	46	46	16	16	16	6	6	0
SEMA3E	0.912607	143.248	0	0	1.35311	TRUE	0.0427567	6.00683	9.45919e-10	2.30581e-08	0.828229	117.443	0	0	9	856	158	47	27	25	25	25	9	9	9		0
WNT1	0.902956	141.42	0	0	2.85124	TRUE	0.694477	100.525	0	0	0.326623	47.2572	0	0	5	440	62	4	12	26	26	26	2	5	5	3	1
HOXB3	0.915025	138.573	0	0	1.13418	TRUE	0.285452	38.6675	0	0	0.0203339	2.75786	0.00290903	0.054783	10	7	267	66	66	11	11	24	4	4	10	4
IRX2	0.941125	138.394	0	0	2.82127	TRUE	0.844887	116.475	0	0	0.0781518	10.7627	2.5825e-27	1.79703e-25	7	677	34	13	0	22	22	22	0	7	7	1	2
HES3	0.929893	136.587	0	0	3.10224	TRUE	0.711632	95.9716	0	0	0.119364	16.1142	1.01393e-58	1.15677e-56	2	457	228	28	58	23	23	23	1	2	2	9	2
MAB21L2	0.904112	136.371	0	0	2.66141	TRUE	0.668316	92.0043	0	0	0.381253	52.4517	0	0	5	821	24	46	12	26	26	26	2	5	5	5	1
SP5	0.926636	134.834	0	0	2.72083	TRUE	0.734678	99.0879	0	0	0.353996	47.679	0	0	5	756	222	4	12	26	26	26	2	5	5	3	1
MSX3	0.923058	128.675	0	0	2.68967	TRUE	0.737562	98.4402	0	0	0.135466	18.0235	6.36911e-73	8.38799e-71	0	534	160	70	29	29	29	2	13	0	0	6	2
METRNL	0.900686	124.256	0	0	1.32708	TRUE	0.0598165	7.35186	9.77327e-14	2.84964e-12	0.801919	99.1481	0	0	1	840	43	29	59	24	24	1	10	10	1		0
FAM19A1	0.907722	123.222	0	0	1.47976	TRUE	0.0455075	5.54373	1.48052e-08	3.34703e-07	0.817821	100.247	0	0	9	535	158	47	27	25	25	25	9	9	9		0
IRX1	0.930322	120.408	0	0	2.71655	TRUE	0.709858	84.9714	0	0	0.268084	32.0732	5.20592e-226	1.62152e-223	5	527	222	4	12	26	26	26	2	5	5	3	1
FOXG1	0.909119	119.445	0	0	2.46222	TRUE	0.66482	81.9857	0	0	0.0478553	5.8941	1.88363e-09	6.98724e-08	6	666	77	76	1	20	20	20	20	6	6	2
FGF3	0.934512	119.166	0	0	2.4372	TRUE	0.695992	81.1767	0	0	0.161642	18.8447	1.62453e-79	2.26087e-77	10	387	193	89	18	4	9	9	4	4	10	10	3
PAX8	0.909259	117.022	0	0	2.36204	TRUE	0.662472	78.8197	0	0	0.120638	14.3766	3.62921e-47	3.49098e-45	11	646	218	79	39	39	2	11	11	11	11	3	2
CYP26B1	0.91465	114.691	0	0	1.95566	TRUE	0.636181	74.0472	0	0	0.0386947	4.49182	3.53081e-06	0.00010189	10	844	161	26	53	4	9	9	4	4	10	4
LHX5	0.917881	114.349	0	0	2.62691	TRUE	0.831056	98.1441	0	0	0.0839091	9.92009	1.70227e-23	1.0988e-21	3	693	33	65	17	35	1	7	7	3	3	0
FOXD4	0.915067	112.177	0	0	2.19705	TRUE	0.55316	63.1033	0	0	0.330807	37.8063	0	0	3	573	286	92	17	35	1	7	7	3	3	0	4
UPP1	0.928794	104.369	0	0	2.11552	TRUE	0.461127	47.6424	0	0	0.3445	35.6128	4.44389e-278	1.64533e-275	10	575	287	22	18	4	9	9	4	4	10	10	6
FABP7	0.936388	103.961	0	0	2.27471	TRUE	0.868342	90.3376	0	0	0.114055	11.8679	8.69016e-33	6.90392e-31	7	747	40	71	0	22	22	22	0	7	7	1	2
EPHA4	0.90583	102.372	0	0	3.16204	TRUE	0.70893	74.3739	0	0	0.0811408	8.50309	9.23047e-18	4.77915e-16	0	699	174	67	67	10	7	15	15	15	0	4
HSD11B2	0.923697	101.982	0	0	2.41971	TRUE	0.0927455	9.44846	1.71918e-21	6.27055e-20	0.869293	89.0151	0	0	9	706	127	15	31	25	25	25	9	9	9		5
FGF8	0.879636	101.85	0	0	3.55851	TRUE	0.578449	61.7764	0	0	0.0817243	8.74817	1.08416e-18	5.94257e-17	2	852	269	28	58	23	23	23	1	2	2	5
IGFBP2	0.941205	101.702	0	0	3.82024	TRUE	0.891473	90.0292	0	0	0.0631702	6.37619	9.07715e-11	3.60569e-09	6	578	22	93	46	46	16	16	16	6	6	0
WNT8B	0.873742	98.8341	0	0	2.62166	TRUE	0.387537	41.8788	0	0	0.254508	27.5272	4.14579e-167	1.01691e-164	12	701	50	101	50	5	5	5	5	12	12	8	1
IGFBP5	0.884048	98.099	0	0	3.87935	TRUE	0.0962834	9.86269	3.02036e-23	1.14639e-21	0.695072	71.4929	0	0	9	499	249	47	27	25	25	25	9	9	9		5
RFX4	0.92478	97.3469	0	0	2.65902	TRUE	0.781673	76.064	0	0	0.164393	16.0079	5.62542e-58	6.30787e-56	7	435	217	77	24	19	19	19	0	7	7	1	0
OTX1	0.894115	95.9757	0	0	2.58034	TRUE	0.685596	68.9867	0	0	0.292853	29.4534	5.70216e-191	1.51207e-188	3	859	121	60	38	38	4	10	21	3	3	8	1
DKK1	0.897954	95.8273	0	0	3.31612	TRUE	0.71366	71.1007	0	0	0.100997	10.0745	3.58225e-24	2.34315e-22	3	787	58	59	16	16	4	10	21	3	3	0	3
FLRT1	0.899021	95.4537	0	0	1.99837	TRUE	0.658193	64.4561	0	0	0.20358	19.9481	7.7783e-89	1.21138e-86	11	845	146	20	42	17	2	11	11	11	11	3	2
CLDN10	0.917313	94.925	0	0	2.30093	TRUE	0.752153	72.0603	0	0	0.0442372	4.24527	1.09164e-05	0.000297931	2	588	37	28	58	23	23	23	1	2	2	3
FBN2	0.938386	91.5235	0	0	2.38848	TRUE	0.809845	73.5736	0	0	0.0856732	7.78676	3.4376e-15	1.62154e-13	6	673	31	75	1	20	20	20	20	6	6	7
FEZF2	0.909439	91.2444	0	0	2.17806	TRUE	0.751245	70.7335	0	0	0.157163	14.8346	4.37936e-50	4.49928e-48	3	683	153	92	17	35	1	7	7	3	3	0	3
PTCH1	0.900813	90.2441	0	0	3.41148	TRUE	0.0652798	6.16233	3.58414e-10	8.9938e-09	0.816213	77.3049	0	0	9	801	124	15	31	25	25	25	9	9	9		4
ARX	0.893712	89.5854	0	0	2.12989	TRUE	0.556107	51.8384	0	0	0.0961916	8.98352	1.31116e-19	7.50116e-18	3	610	281	64	2	27	1	7	7	3	3	0
TNFRSF19	0.933101	88.5224	0	0	2.33872	TRUE	0.745213	65.681	0	0	0.116791	10.3037	3.38869e-25	2.27727e-23	11	501	223	20	42	17	2	11	11	11	11	9	2
TAL2	0.916138	88.0465	0	0	2.58104	TRUE	0.708067	63.4466	0	0	0.346348	31.0096	1.99978e-211	5.77085e-209	3	497	121	60	38	38	4	10	21	3	3	8	1
GDF10	0.915661	87.4534	0	0	1.99678	TRUE	0.692639	61.6442	0	0	0.33016	29.3155	3.28908e-189	8.60555e-187	0	705	13	0	7	15	15	2	13	0	0	6	3
FREM1	0.924134	86.9638	0	0	1.49806	TRUE	0.0432812	3.74144	9.14839e-05	0.00146666	0.905413	78.738	0	0	9	679	127	15	31	25	25	25	9	9	9		5
GBX2	0.890478	86.7401	0	0	2.20285	TRUE	0.826503	74.8711	0	0	0.108861	9.87458	2.68273e-23	1.72037e-21	7	419	40	71	0	22	22	22	0	7	7	1
ZFP703	0.918974	85.5564	0	0	2.1717	TRUE	0.73483	63.5691	0	0	0.126115	10.8822	7.00781e-28	4.96441e-26	10	799	132	22	18	4	9	9	4	4	10	4	0
NAB2	0.907194	84.6305	0	0	1.69689	TRUE	0.557513	47.9275	0	0	0.0305301	2.61876	0.00441248	0.0798029	10	566	161	26	53	4	9	9	4	4	10	4
PAX3	0.855433	83.9858	0	0	2.93901	TRUE	0.423297	40.3649	0	0	0.239562	22.8177	1.52888e-115	3.00012e-113	0	842	226	86	29	29	29	2	13	0	0	10	2
OPCML	0.900774	83.1614	0	0	2.38971	TRUE	0.659067	56.887	0	0	0.221789	19.0907	1.50949e-81	2.19412e-79	0	437	65	9	7	15	15	2	13	0	0	6	0
PHLDA1	0.937525	82.8915	0	0	3.08118	TRUE	0.723326	59.7518	0	0	0.204444	16.8725	3.58358e-64	4.36774e-62	3	436	181	90	16	16	4	10	21	3	3	8	2
2700046A07RIK	0.911562	82.6632	0	0	2.00719	TRUE	0.793237	66.6781	0	0	0.235554	19.7654	2.95774e-87	4.4992e-85	5	798	203	4	12	26	26	26	2	5	5	3	1
SPINK1	0.890622	80.408	0	0	1.92284	TRUE	0.122885	10.4121	1.09147e-25	4.42521e-24	0.655908	55.8749	0	0	9	794	123	61	61	14	14	14	9	9	9	2	4
APELA	0.9082	80.3459	0	0	1.54977	TRUE	0.12118	9.8516	3.37296e-23	1.27775e-21	0.662662	54.1576	0	0	1	687	44	51	11	30	30	1	10	10	1		6
KCNA1	0.871568	79.6269	0	0	1.91611	TRUE	0.377264	31.3872	1.51406e-216	1.95463e-214	0.114151	9.50146	1.03488e-21	6.32631e-20	10	733	142	38	3	11	11	24	4	4	10	4
SLIT3	0.918952	79.622	0	0	2.00909	TRUE	0.0640831	5.04286	2.29318e-07	4.80246e-06	0.83061	65.7093	0	0	9	803	158	47	27	25	25	25	9	9	9		6
TRH	0.821537	78.8582	0	0	2.87206	TRUE	0.578236	51.2897	0	0	0.215128	19.0232	5.48071e-81	7.90795e-79	5	853	277	32	65	3	13	13	2	5	5	5	1
CAR10	0.906449	77.7604	0	0	1.8406	TRUE	0.719734	57.0577	0	0	0.280921	22.215	1.22964e-109	2.25507e-107	0	537	192	111	19	10	7	15	15	15	0	10	3
GSC	0.882701	76.8263	0	0	1.75042	TRUE	0.152717	12.5491	2.00955e-36	1.00595e-34	0.595347	49.1823	0	0	9	640	123	61	61	14	14	14	9	9	9	0	3
NR2F1	0.921233	76.6113	0	0	3.56987	TRUE	0.69242	53.941	0	0	0.193076	15.0347	2.17659e-51	2.25985e-49	7	515	257	13	0	22	22	22	0	7	7	1	2
CAR4	0.899599	75.2996	0	0	3.32745	TRUE	0.623114	47.9845	0	0	0.513911	39.5647	0	0	5	735	183	91	20	42	13	13	2	5	5	8	0
NRP2	0.845164	74.0079	0	0	3.63375	TRUE	0.452194	37.0328	1.70158e-300	2.7369e-298	0.24162	19.75	4.01307e-87	6.05758e-85	0	629	13	0	7	15	15	2	13	0	0	1	2
POU3F2	0.915489	73.8168	0	0	2.48937	TRUE	0.729589	55.0713	0	0	0.0471273	3.55992	0.000185487	0.00435204	11	538	268	27	56	17	2	11	11	11	11	9
ENPP2	0.897701	73.5592	0	0	2.24604	TRUE	0.694572	52.1489	0	0	0.243072	18.2277	1.556e-74	2.09133e-72	5	584	277	32	65	3	13	13	2	5	5	5	1
WLS	0.929292	72.6646	0	0	3.39656	TRUE	0.707407	51.245	0	0	0.126835	9.18603	2.03798e-20	1.2082e-18	7	659	164	77	24	19	19	19	0	7	7	9
IGDCC3	0.922051	71.8674	0	0	2.63761	TRUE	0.667088	48.2204	0	0	0.173372	12.5364	2.36063e-36	1.96282e-34	11	563	223	20	42	17	2	11	11	11	11	9	1
NAPSA	0.895303	70.9644	0	0	1.2538	TRUE	0.282735	19.9345	1.02197e-88	8.2189e-87	0.0305463	2.159	0.015425	0.230881	10	783	141	14	3	11	11	24	4	4	10	4
ERMN	0.928628	70.8167	0	0	1.63473	TRUE	0.814412	57.8868	0	0	0.084633	6.02203	8.61208e-10	3.25616e-08	6	725	31	75	1	20	20	20	20	6	6	7
PTPRZ1	0.911771	70.6431	0	0	2.27883	TRUE	0.793983	57.1999	0	0	0.0935591	6.74513	7.64463e-12	3.19852e-10	6	248	210	76	1	20	20	20	20	6	6	2
VIM	0.825675	70.2417	0	0	3.30882	TRUE	0.354524	28.1067	4.05861e-174	4.63035e-172	0.549076	43.6293	0	0	1	711	177	68	68	18	18	3	3	16	1	1	0
GREM1	0.855857	70.2146	0	0	2.06749	TRUE	0.50953	38.6392	0	0	0.0627479	4.7685	9.28024e-07	2.81462e-05	14	811	224	39	8	6	28	0	14	14	14	2
COL1A1	0.891283	68.2423	0	0	1.34303	TRUE	0.481797	33.9426	7.85055e-253	1.10037e-250	0.0380691	2.67678	0.00371669	0.068353	10	860	199	26	53	4	9	9	4	4	10	4
HDAC6	0.910287	68.0554	0	0	2.42229	TRUE	0.879154	61.665	0	0	0.0350065	2.45633	0.00701823	0.118417	6	749	22	93	46	46	16	16	16	6	6	0
AXIN2	0.880709	67.6587	0	0	2.48705	TRUE	0.609058	43.3807	0	0	0.269028	19.1632	3.75545e-82	5.49949e-80	11	715	159	20	42	17	2	11	11	11	11	9	1
EFNB1	0.917284	67.5064	0	0	2.56744	TRUE	0.819643	56.4317	0	0	0.0570859	3.93157	4.21958e-05	0.00107673	7	432	176	30	62	19	19	19	0	7	7	1
2610027F03RIK	0.915725	67.3607	0	0	1.68436	TRUE	0.774019	52.5643	0	0	0.118181	8.02657	5.01194e-16	2.42838e-14	11	746	64	8	36	36	2	11	11	11	11	3
LMO1	0.909672	67.3107	0	0	2.47321	TRUE	0.806665	56.3123	0	0	0.157512	10.9837	2.28841e-28	1.6437e-26	3	643	20	33	16	16	4	10	21	3	3	8	2
DKK2	0.876943	66.3523	0	0	1.08612	TRUE	0.0936085	6.41792	6.90745e-11	1.79292e-09	0.828121	56.819	0	0	1	826	194	12	45	24	24	1	10	10	1		0
TCF7L2	0.900635	65.6885	0	0	3.42552	TRUE	0.643323	43.7733	0	0	0.12979	8.83904	4.82714e-19	2.67579e-17	6	514	108	75	1	20	20	20	20	6	6	2
NKX6-2	0.815569	65.6519	0	0	2.91151	TRUE	0.524007	41.4961	0	0	0.165997	13.1467	8.89221e-40	7.85999e-38	13	748	186	42	9	2	27	27	6	13	13	1	3
NRG1	0.908314	64.9067	0	0	2.08354	TRUE	0.68645	45.2502	0	0	0.141013	9.2952	7.34615e-21	4.40836e-19	4	655	163	40	15	32	32	12	12	1	4	2
LMX1B	0.87942	64.9005	0	0	1.76304	TRUE	0.722629	49.2871	0	0	0.274757	18.7556	8.71308e-79	1.19564e-76	11	476	57	8	36	36	2	11	11	11	11	3	0
MAPK10	0.868954	64.6721	0	0	1.73484	TRUE	0.575992	39.9702	0	0	0.301871	20.8559	6.73484e-97	1.11057e-94	0	638	13	0	7	15	15	2	13	0	0	6	3
SPARCL1	0.914825	64.6523	0	0	1.67068	TRUE	0.572611	37.6876	0	0	0.321348	21.1756	8.01021e-100	1.37881e-97	0	577	65	9	7	15	15	2	13	0	0	6	0
PKDCC	0.923386	64.6149	0	0	2.549	TRUE	0.46202	29.9481	2.33074e-197	2.82322e-195	0.343888	22.2837	2.65864e-110	4.96863e-108	4	612	205	102	15	32	32	12	12	1	4	4	4
FZD10	0.87369	64.3345	0	0	1.91114	TRUE	0.667829	46.1915	0	0	0.148867	10.2986	3.57526e-25	2.39445e-23	7	777	90	30	62	19	19	19	0	7	7	1	2
CDKN1C	0.832072	64.146	0	0	3.7488	TRUE	0.208061	14.9705	5.72494e-51	3.43549e-49	0.523987	37.786	0	0	4	595	297	50	35	8	0	4	19	1	4	2	5
CKB	0.864557	64.0894	0	0	2.51047	TRUE	0.152137	10.3424	2.26635e-25	9.07605e-24	0.698786	47.696	0	0	1	732	43	29	59	24	24	1	10	10	1	1	0
SHTN1	0.912622	63.924	0	0	1.50409	TRUE	0.696522	45.513	0	0	0.050652	3.31287	0.00046172	0.0100353	6	838	77	76	1	20	20	20	20	6	6	2
MAP2	0.874758	63.5112	0	0	2.18432	TRUE	0.258668	17.2696	3.98152e-67	2.7804e-65	0.703115	47.1705	0	0	9	605	2	52	43	14	14	14	9	9	9	8	6
SELENOP	0.860054	63.1665	0	0	1.81886	TRUE	0.0808742	5.42054	2.97096e-08	6.53577e-07	0.355074	23.8952	1.71917e-126	3.5141e-124	1	717	30	3	32	30	30	1	10	10	1		5
PLAT	0.910589	63.0204	0	0	1.80501	TRUE	0.380016	24.0668	2.78754e-128	2.65533e-126	0.290146	18.3905	7.82427e-76	1.05887e-73	10	549	274	22	18	4	9	9	4	4	10	4	0
EPB41L4A	0.90384	62.8891	0	0	1.98393	TRUE	0.63942	41.5744	0	0	0.347321	22.5672	4.54795e-113	8.66451e-111	0	352	65	9	7	15	15	2	13	0	0	1	0
SEMA4F	0.885018	62.5054	0	0	1.42849	TRUE	0.458672	29.6794	7.07483e-194	8.46521e-192	0.0526178	3.39992	0.000337024	0.00756974	10	818	199	26	53	4	9	9	4	4	10	4
CRIP2	0.904167	62.4315	0	0	2.42381	TRUE	0.801798	51.252	0	0	0.236091	15.0747	1.18736e-51	1.25266e-49	5	724	203	4	12	26	26	26	2	5	5	3	0
NR2F2	0.873013	62.3645	0	0	3.27884	TRUE	0.550739	36.6355	3.88895e-294	6.10503e-292	0.164504	10.9261	4.32435e-28	3.0857e-26	0	531	265	21	19	10	7	15	15	15	0	4	0
HES5	0.872561	62.1874	0	0	3.64769	TRUE	0.537721	35.8413	1.25836e-281	1.92913e-279	0.145917	9.71878	1.25379e-22	7.88563e-21	13	589	294	5	48	2	27	27	6	13	13	1
EPHA7	0.861161	61.3056	0	0	2.88799	TRUE	0.608896	40.6326	0	0	0.0284063	1.89626	0.0289631	0.382163	4	579	289	16	4	21	21	12	12	1	4	4
FGF17	0.861536	60.8784	0	0	2.14762	TRUE	0.560503	36.8119	5.95076e-297	9.41707e-295	0.0795159	5.23456	8.26914e-08	2.70894e-06	2	572	269	28	58	23	23	23	1	2	2	3
THBS1	0.828978	60.5795	0	0	2.36636	TRUE	0.562668	38.0979	0	0	0.329249	22.2458	6.19592e-110	1.14701e-107	0	630	82	21	19	10	7	15	15	15	0	6	3
IL17RD	0.861562	60.2984	0	0	2.29685	TRUE	0.586132	38.1178	0	0	0.138991	9.05031	7.12809e-20	4.1383e-18	2	813	79	87	21	13	8	18	18	2	2	5
NEDD9	0.914335	60.2316	0	0	1.64711	TRUE	0.177081	10.5747	1.9526e-26	8.01587e-25	0.731884	43.9221	0	0	1	564	43	29	59	24	24	1	10	10	1	10	0
ARHGEF28	0.908158	59.9976	0	0	1.24711	TRUE	0.0569013	3.38099	0.000361128	0.00532413	0.732751	43.7906	0	0	1	536	43	29	59	24	24	1	10	10	1		0
PLXNA2	0.880604	59.6401	0	0	2.45655	TRUE	0.743497	47.2642	0	0	0.171624	10.8722	7.82319e-28	5.5221e-26	0	542	129	9	7	15	15	2	13	0	0	10	0
ARL4A	0.901646	59.2683	0	0	3.10798	TRUE	0.284009	17.521	4.9542e-69	3.47201e-67	0.644705	39.8519	0	0	1	479	107	94	33	33	33	3	3	16	1	3	5
EHBP1	0.916342	59.2277	0	0	2.33228	TRUE	0.79722	48.1653	0	0	0.278915	16.8447	5.73406e-64	6.94565e-62	3	466	121	60	38	38	4	10	21	3	3	8	1
DMRTA2	0.892683	58.9175	0	0	2.02067	TRUE	0.649102	40.7847	0	0	0.142486	8.95936	1.63281e-19	9.28715e-18	3	846	56	114	2	27	1	7	7	3	3	0
CHST2	0.921608	58.6934	0	0	2.50274	TRUE	0.639476	37.9511	0	0	0.150648	8.93757	1.9891e-19	1.12484e-17	11	450	146	20	42	17	2	11	11	11	11	3
RBP1	0.917316	58.6813	0	0	2.99745	TRUE	0.859818	51.5943	0	0	0.0830935	4.98895	3.0354e-07	9.57615e-06	7	843	40	71	0	22	22	22	0	7	7	1
SP9	0.905661	58.6715	0	0	1.74485	TRUE	0.717493	43.4445	0	0	0.0633046	3.84281	6.08176e-05	0.00152222	2	702	37	28	58	23	23	23	1	2	2	9
HES1	0.928363	58.5813	0	0	3.03559	TRUE	0.608992	35.7624	2.12452e-280	3.23174e-278	0.246079	14.4605	1.07618e-47	1.07744e-45	6	599	108	75	1	20	20	20	20	6	6	2	4
FEZ1	0.933166	58.4815	0	0	2.3111	TRUE	0.832609	48.809	0	0	0.107994	6.33091	1.21861e-10	4.78254e-09	13	681	49	5	48	2	27	27	6	13	13	1
NAV2	0.886056	58.3214	0	0	2.44718	TRUE	0.679635	41.1831	0	0	0.110023	6.67091	1.27114e-11	5.27348e-10	11	520	146	20	42	17	2	11	11	11	11	3
BARHL2	0.83745	58.2749	0	0	1.81102	TRUE	0.356229	23.2716	4.30019e-120	4.03745e-118	0.186515	12.1894	1.76969e-34	1.44094e-32	12	712	50	101	50	5	5	5	5	12	12	8	1
FZD8	0.92193	57.8125	0	0	1.92781	TRUE	0.713977	41.8694	0	0	0.079739	4.67986	1.43538e-06	4.31339e-05	6	829	77	76	1	20	20	20	20	6	6	2
MEIS2	0.91752	57.2133	0	0	3.69065	TRUE	0.70658	41.1181	0	0	0.166999	9.69685	1.55479e-22	9.74747e-21	0	511	255	67	67	10	7	15	15	15	0	4
PPP1R1B	0.880347	57.1343	0	0	1.3213	TRUE	0.480413	29.0636	5.17599e-186	5.97462e-184	0.033982	2.05264	0.0200538	0.285073	10	848	199	26	53	4	9	9	4	4	10	4
STMN2	0.875842	56.7252	0	0	3.86583	TRUE	0.582735	34.9861	1.83089e-268	2.6613e-266	0.405352	24.2923	1.18209e-130	2.44169e-128	0	459	192	111	19	10	7	15	15	15	0	6	3
MYLK	0.842434	56.5877	0	0	2.29458	TRUE	0.541738	33.5621	3.00233e-247	4.14893e-245	0.242949	15.0652	1.37115e-51	1.43883e-49	11	544	159	20	42	17	2	11	11	11	11	9	2
GPC3	0.929053	56.4013	0	0	3.35464	TRUE	0.348585	19.5573	1.78762e-85	1.42596e-83	0.506511	28.5088	4.55781e-179	1.14664e-176	4	703	103	103	15	32	32	12	12	1	4	2	4
TUBB3	0.908888	56.33	0	0	2.43643	TRUE	0.764416	44.5077	0	0	0.14669	8.55241	6.02725e-18	3.15394e-16	3	695	33	65	17	35	1	7	7	3	3	0
DMBX1	0.858485	55.8064	0	0	1.40852	TRUE	0.649592	38.3966	0	0	0.320384	18.93	3.22966e-80	4.5594e-78	5	438	24	46	12	26	26	26	2	5	5	3	1
TIMP3	0.874506	55.4889	0	0	2.38477	TRUE	0.0554698	3.29234	0.000496792	0.00723186	0.633074	37.7308	0	0	9	451	124	15	31	25	25	25	9	9	9		4
MSX1	0.814696	55.4696	0	0	2.77009	TRUE	0.279007	18.8292	2.17551e-79	1.64193e-77	0.406447	27.4197	7.98391e-166	1.91059e-163	8	744	118	98	51	0	3	8	8	8	8	1	1
INA	0.925191	55.1146	0	0	2.29048	TRUE	0.893254	49.9208	0	0	0.0873213	4.88083	5.28212e-07	1.63077e-05	3	429	88	33	16	16	4	10	21	3	3	8
PAX2	0.845445	54.6008	0	0	2.42026	TRUE	0.440895	26.3526	2.39514e-153	2.52687e-151	0.201504	12.0509	9.59453e-34	7.65339e-32	2	565	282	87	21	13	8	18	18	2	2	5	2
MECOM	0.884966	53.6547	0	0	1.75723	TRUE	0.733508	41.9606	0	0	0.0655694	3.75472	8.67671e-05	0.00213898	3	487	56	114	2	27	1	7	7	3	3	0
SULF1	0.876621	53.4783	0	0	2.49044	TRUE	0.247954	13.8718	4.69196e-44	2.65332e-42	0.494587	27.7116	2.528e-169	6.27935e-167	0	505	252	44	44	44	17	17	17	0	0	4	6
OLIG3	0.910329	53.3786	0	0	1.74863	TRUE	0.685373	38.3765	0	0	0.139764	7.78871	3.38473e-15	1.60045e-13	0	667	160	70	29	29	29	2	13	0	0	6
IRF2BPL	0.883783	53.2464	0	0	2.3219	TRUE	0.687866	38.1342	0	0	0.156472	8.67426	2.08116e-18	1.12194e-16	11	753	57	8	36	36	2	11	11	11	11	9
KRT8	0.858969	53.1922	0	0	2.22508	TRUE	0.210401	11.9742	2.42534e-33	1.13858e-31	0.582967	33.3548	3.09887e-244	1.06683e-241	4	421	116	50	35	8	0	4	19	1	4	2	0
NKD1	0.90295	53.1551	0	0	2.47125	TRUE	0.665195	36.6131	8.83358e-294	1.37572e-291	0.259872	14.3061	1.00181e-46	9.54296e-45	11	755	102	8	36	36	2	11	11	11	11	3	1
KLHL14	0.868814	52.9049	0	0	1.46582	TRUE	0.644092	36.1819	5.86491e-287	9.06198e-285	0.101058	5.68637	6.48841e-09	2.28176e-07	2	494	37	28	58	23	23	23	1	2	2	3
SEMA6A	0.906394	52.8636	0	0	2.08579	TRUE	0.680098	36.8898	3.36561e-298	5.36938e-296	0.1302	7.07206	7.63242e-13	3.32824e-11	3	481	215	92	17	35	1	7	7	3	3	7
BOC	0.889524	52.5835	0	0	1.78114	TRUE	0.7258	40.9746	0	0	0.117063	6.59832	2.07922e-11	8.48244e-10	7	617	3	30	62	19	19	19	0	7	7	1
TMEM132C	0.83308	52.4628	0	0	2.0022	TRUE	0.558899	32.5398	1.45923e-232	1.94793e-230	0.269369	15.6995	7.61863e-56	8.25969e-54	11	496	159	20	42	17	2	11	11	11	11	3	1
DUSP6	0.876093	52.2109	0	0	2.21034	TRUE	0.411716	22.5792	3.47123e-113	3.15351e-111	0.366077	20.1282	2.0908e-90	3.28222e-88	1	445	97	97	33	33	33	3	3	16	1	5	0
SPRY2	0.817048	52.0018	0	0	2.71402	TRUE	0.523169	31.0747	2.6457e-212	3.3712e-210	0.161579	9.60873	3.67235e-22	2.29498e-20	2	495	247	69	69	23	23	23	1	2	2	1
KRT18	0.832499	51.8949	0	0	2.69065	TRUE	0.352369	20.26	1.44886e-91	1.19954e-89	0.430465	24.8068	3.78963e-136	8.08304e-134	4	639	116	50	35	8	0	4	19	1	4	0	6
NKX2-4	0.876784	51.7033	0	0	1.28209	TRUE	0.230816	12.833	5.35459e-38	2.75782e-36	0.438152	24.5717	1.26795e-133	2.64692e-131	9	581	123	61	61	14	14	14	9	9	9	7	3
FOXB1	0.865356	51.6767	0	0	2.87689	TRUE	0.433628	24.433	3.81552e-132	3.68828e-130	0.249755	14.0805	2.50099e-45	2.32592e-43	13	467	233	25	9	2	27	27	6	13	13	1	4
NSG2	0.91891	51.565	0	0	1.99556	TRUE	0.66902	35.1015	3.19694e-270	4.71681e-268	0.138461	7.2485	2.10706e-13	9.46152e-12	10	849	52	22	18	4	9	9	4	4	10	10
FGF18	0.88074	51.4449	0	0	1.6152	TRUE	0.637122	34.8825	6.8404e-267	9.79774e-265	0.0573813	3.14503	0.00083035	0.0174267	11	543	64	8	36	36	2	11	11	11	11	3
FAM84A	0.88501	51.0873	0	0	1.52389	TRUE	0.559803	29.5263	6.61677e-192	7.82174e-190	0.0627073	3.30466	0.000475459	0.0102994	10	671	199	26	53	4	9	9	4	4	10	4
EFNA2	0.904827	50.8239	0	0	2.83721	TRUE	0.721099	37.2819	1.61307e-304	2.61597e-302	0.364277	18.8208	2.55059e-79	3.52466e-77	5	665	24	46	12	26	26	26	2	5	5	5	1
NR2E1	0.86741	50.6557	0	0	1.50938	TRUE	0.639362	34.9559	5.26547e-268	7.59737e-266	0.0413609	2.26205	0.0118473	0.184948	3	825	281	64	2	27	1	7	7	3	3	0
VIT	0.898674	50.4662	0	0	1.12802	TRUE	0.069559	3.52772	0.000209578	0.00318062	0.781515	39.8247	0	0	1	661	43	29	59	24	24	1	10	10	1		0
NEUROG1	0.76922	50.108	0	0	1.39981	TRUE	0.27898	19.0904	1.51641e-81	1.16236e-79	0.249679	17.3371	1.23534e-67	1.56394e-65	12	268	95	63	63	31	31	5	5	12	12	5	1
FZD4	0.86859	49.9334	0	0	1.64241	TRUE	0.719727	38.7715	0	0	0.0333743	1.80066	0.0358779	0.451592	3	518	281	64	2	27	1	7	7	3	3	0
PHLDA2	0.882937	49.8225	0	0	1.90747	TRUE	0.235213	11.9717	2.49868e-33	1.1702e-31	0.0332183	1.69125	0.0453949	0.50035	4	691	71	37	4	21	21	12	12	1	4	4
SCUBE1	0.886257	49.4114	0	0	2.1894	TRUE	0.667161	34.6753	9.28845e-264	1.32078e-261	0.0397604	2.06576	0.0194256	0.277632	6	614	77	76	1	20	20	20	20	6	6	2
FGF15	0.879421	49.2623	0	0	2.8959	TRUE	0.678142	35.514	1.4921e-276	2.23508e-274	0.22472	11.7734	2.67766e-32	2.11019e-30	13	571	285	73	6	28	6	6	6	13	13	1	2
THSD7A	0.882132	49.1915	0	0	1.64555	TRUE	0.349897	18.1679	4.63621e-74	3.35706e-72	0.552835	28.843	3.10105e-183	8.00684e-181	4	492	147	84	35	8	0	4	19	1	4	7	5
VAX1	0.900638	49.1124	0	0	1.10677	TRUE	0.515622	26.6487	9.25857e-157	1.00376e-154	0.0565592	2.92865	0.00170219	0.0342586	14	765	99	118	52	6	28	0	14	14	14	2
TIMP4	0.865664	48.9319	0	0	1.2473	TRUE	0.0592581	3.1135	0.000924402	0.0128741	0.614275	32.4682	1.5015e-231	4.75226e-229	1	814	30	3	32	30	30	1	10	10	1		5
LIX1	0.916971	48.8935	0	0	2.73392	TRUE	0.366572	18.0808	2.25665e-73	1.62779e-71	0.442008	21.8272	6.40399e-106	1.15289e-103	5	672	167	46	12	26	26	26	2	5	5	5	2
WIF1	0.916153	48.7231	0	0	1.34487	TRUE	0.321468	15.7962	1.65229e-56	1.0459e-54	0.616765	30.3976	2.95041e-203	8.15436e-201	1	719	179	11	13	18	18	3	3	16	1	3	6
FAM46A	0.887168	48.5374	0	0	1.23829	TRUE	0.0952905	4.72766	1.13561e-06	2.21072e-05	0.825644	41.0723	0	0	1	827	194	12	45	24	24	1	10	10	1		0
DMRT3	0.884083	48.3629	0	0	1.5011	TRUE	0.594671	30.6672	7.80131e-207	9.75064e-205	0.183915	9.49659	1.08438e-21	6.60832e-20	3	554	56	114	2	27	1	7	7	3	3	0
VANGL1	0.899671	48.039	0	0	1.61171	TRUE	0.0647924	3.14777	0.000822592	0.011538	0.737143	35.9998	4.20973e-284	1.65215e-281	1	533	43	29	59	24	24	1	10	10	1		0
CNTNAP2	0.887691	47.6807	0	0	2.22574	TRUE	0.490535	24.8484	1.34454e-136	1.32583e-134	0.426076	21.6059	7.90756e-104	1.38545e-101	12	832	50	101	50	5	5	5	5	12	12	8	1
JAG1	0.833407	47.5627	0	0	2.54037	TRUE	0.624282	33.1015	1.41161e-240	1.92361e-238	0.142678	7.5604	2.00923e-14	9.29887e-13	13	623	11	5	48	2	27	27	6	13	13	1
LGR4	0.845276	47.4713	0	0	2.04239	TRUE	0.586515	30.6984	2.98864e-207	3.75936e-205	0.379124	19.8092	1.24007e-87	1.90109e-85	0	645	296	111	19	10	7	15	15	15	0	6	4
ACER2	0.910391	46.6883	0	0	2.15383	TRUE	0.629747	30.6661	8.05872e-207	1.00086e-204	0.142636	6.95186	1.80248e-12	7.67245e-11	14	685	224	39	8	6	28	0	14	14	14	7
WNT4	0.897432	46.5401	0	0	1.73363	TRUE	0.633766	30.5598	2.09598e-205	2.58675e-203	0.307539	14.8351	4.34611e-50	4.48862e-48	5	613	62	4	12	26	26	26	2	5	5	3	1
GADD45G	0.690763	46.3765	0	0	1.0633	TRUE	0.163529	12.3555	2.27375e-35	1.10167e-33	0.0829572	6.41149	7.20531e-11	2.88551e-09	12	850	95	63	63	31	31	5	5	12	12	3
PCDH8	0.873785	46.2991	0	0	2.0091	TRUE	0.385845	18.984	1.156e-80	8.79229e-79	0.459515	22.6115	1.67038e-113	3.21352e-111	1	779	39	68	68	18	18	3	3	16	1	10	0
TRABD2B	0.89211	45.993	0	0	1.60183	TRUE	0.194349	9.09092	4.91023e-20	1.73298e-18	0.735347	34.5962	1.44061e-262	5.23501e-260	1	745	0	29	59	24	24	1	10	10	1		0
TAC1	0.907889	45.655	0	0	1.48404	TRUE	0.683283	31.8579	5.11231e-223	6.68792e-221	0.0620314	2.88859	0.00193489	0.038352	14	590	42	39	8	6	28	0	14	14	14	7
PAK3	0.895282	45.581	0	0	2.09709	TRUE	0.851492	40.6457	0	0	0.0513415	2.45229	0.0070976	0.11955	3	651	85	65	17	35	1	7	7	3	3	0
SALL3	0.886293	45.4834	0	0	2.4021	TRUE	0.67691	32.6346	6.63676e-234	8.92007e-232	0.183453	8.85816	4.06719e-19	2.26735e-17	3	649	215	92	17	35	1	7	7	3	3	2
GBX1	0.913674	45.4507	0	0	1.0268	TRUE	0.655632	30.0366	1.6334e-198	1.99082e-196	0.0548354	2.5074	0.00608108	0.104859	10	718	74	2	28	11	11	24	4	4	10	4
FZD7	0.836784	45.0369	0	0	2.17318	TRUE	0.658794	33.0294	1.53861e-239	2.08221e-237	0.290037	14.5006	6.00836e-48	6.07743e-46	0	616	296	111	19	10	7	15	15	15	0	6	4
TRP53I11	0.884624	44.843	0	0	2.69907	TRUE	0.442287	21.1879	6.17667e-100	5.36305e-98	0.483382	23.2004	2.25768e-119	4.47499e-117	1	218	107	94	33	33	33	3	3	16	1	5	6
POU6F2	0.900449	44.2487	0	0	1.50174	TRUE	0.177623	7.87695	1.67733e-15	5.14286e-14	0.710778	31.7294	3.05926e-221	9.23566e-219	1	552	0	29	59	24	24	1	10	10	1		0
LDHB	0.850707	44.0858	0	0	3.41131	TRUE	0.734258	35.4783	5.30793e-276	7.89072e-274	0.118379	5.70472	5.82677e-09	2.07135e-07	3	569	181	90	16	16	4	10	21	3	3	8
FBLN2	0.910375	44.0681	0	0	1.91128	TRUE	0.77132	34.4509	2.18295e-260	3.08173e-258	0.14069	6.29259	1.56111e-10	6.09019e-09	11	454	64	8	36	36	2	11	11	11	11	3
MYCL	0.928191	43.8835	0	0	2.30038	TRUE	0.810337	35.6323	2.21772e-278	3.34757e-276	0.0340947	1.49845	0.0670081	0.50035	13	529	11	5	48	2	27	27	6	13	13	1
SLIT2	0.873103	43.7007	0	0	1.87955	TRUE	0.0838506	3.83189	6.35816e-05	0.00105022	0.696832	32.0682	6.11993e-226	1.87643e-223	1	633	18	12	45	24	24	1	10	10	1		0
NRGN	0.900431	43.5744	0	0	1.32858	TRUE	0.468085	20.8104	1.74293e-96	1.4742e-94	0.0445558	1.97655	0.0240463	0.329512	10	809	199	26	53	4	9	9	4	4	10	4
SAMD5	0.861824	43.5424	0	0	1.51852	TRUE	0.674479	31.8613	4.59634e-223	6.05329e-221	0.340684	16.094	1.40616e-58	1.58581e-56	5	805	62	4	12	26	26	26	2	5	5	3	1
DLK1	0.871893	43.0462	0	0	2.37152	TRUE	0.80395	37.4663	1.62826e-307	2.66261e-305	0.0635655	2.96019	0.00153722	0.03113	14	291	259	116	25	12	12	0	14	14	14	0
PDZRN3	0.884221	42.9719	0	0	1.62623	TRUE	0.0458082	2.06745	0.0193458	0.200859	0.807572	36.6144	8.42635e-294	3.37449e-291	9	580	190	52	43	14	14	14	9	9	9		5
PCP4L1	0.879476	42.6638	0	0	1.5975	TRUE	0.638192	29.3529	1.0966e-189	1.28854e-187	0.197804	9.10221	4.42556e-20	2.59232e-18	11	790	102	8	36	36	2	11	11	11	11	3
SLC44A5	0.901505	42.5893	0	0	1.32611	TRUE	0.700088	31.1602	1.84435e-213	2.36546e-211	0.251736	11.1561	3.34201e-29	2.47473e-27	0	694	13	0	7	15	15	2	13	0	0	6	2
NUAK1	0.888487	42.2389	0	0	2.01778	TRUE	0.698766	30.9154	3.7127e-210	4.70027e-208	0.15057	6.63932	1.57566e-11	6.482e-10	0	740	227	9	7	15	15	2	13	0	0	10
LIFR	0.904517	41.792	0	0	1.47725	TRUE	0.139524	5.92755	1.53744e-09	3.69721e-08	0.808174	34.5025	3.67288e-261	1.31042e-258	1	773	0	29	59	24	24	1	10	10	1		6
WNT7B	0.850093	41.7722	0	0	1.56506	TRUE	0.434156	20.4083	7.06195e-93	5.92208e-91	0.343861	16.1588	4.92034e-59	5.64631e-57	12	217	50	101	50	5	5	5	5	12	12	8	1
PTN	0.891429	41.5038	0	0	3.70211	TRUE	0.777165	33.6988	3.01422e-249	4.19489e-247	0.169749	7.36336	8.96657e-14	4.05417e-12	7	835	34	13	0	22	22	22	0	7	7	1
ID2	0.882533	41.4522	0	0	3.77287	TRUE	0.416771	18.5351	5.38326e-77	3.97127e-75	0.401013	17.854	1.3457e-71	1.74878e-69	0	647	29	70	29	29	29	2	13	0	0	6	2
CYP26A1	0.892023	41.4383	0	0	1.51974	TRUE	0.5436	23.2501	7.08962e-120	6.62474e-118	0.339536	14.4591	1.09859e-47	1.0943e-45	0	415	47	24	49	1	17	17	17	0	0	6	4
CLU	0.921215	41.2516	0	0	1.69508	TRUE	0.836321	35.0061	9.08978e-269	1.33111e-266	0.111358	4.65774	1.59853e-06	4.789e-05	3	365	58	59	16	16	4	10	21	3	3	8
PLAGL1	0.869055	41.2111	0	0	1.83703	TRUE	0.39427	17.5598	2.50047e-69	1.77136e-67	0.355497	15.8923	3.58171e-57	3.94854e-55	4	561	115	40	15	32	32	12	12	1	4	2	3
DMRTA1	0.87714	40.4325	0	0	1.42073	TRUE	0.592636	25.8191	2.7087e-147	2.75404e-145	0.103741	4.51683	3.13868e-06	9.15161e-05	14	808	139	74	23	12	12	0	14	14	14	0
PLEKHG1	0.885804	40.3619	0	0	1.45883	TRUE	0.239569	9.88545	2.40706e-23	9.20735e-22	0.749412	31.0533	5.14849e-212	1.50789e-209	1	267	293	12	45	24	24	1	10	10	1		0
UTRN	0.816128	40.2497	0	0	2.11154	TRUE	0.118653	5.36302	4.0921e-08	8.96196e-07	0.655746	29.785	3.05312e-195	8.32102e-193	1	697	0	29	59	24	24	1	10	10	1		0
CLEC2L	0.873071	40.137	0	0	1.72794	TRUE	0.349318	14.7348	1.92637e-49	1.14897e-47	0.550311	23.3052	1.96155e-120	3.9277e-118	1	608	275	11	13	18	18	3	3	16	1	9	0
PANTR1	0.908607	40.0635	0	0	1.69803	TRUE	0.682741	27.9076	1.07861e-171	1.22344e-169	0.106937	4.37299	6.12788e-06	0.000172028	11	837	290	27	56	17	2	11	11	11	11	3
LPAR1	0.911564	40.0035	0	0	2.18394	TRUE	0.678563	27.7502	8.65374e-170	9.64843e-168	0.103572	4.23508	1.14236e-05	0.000310908	6	807	77	76	1	20	20	20	20	6	6	7
SOX5	0.863977	39.957	0	0	1.83993	TRUE	0.577275	24.8202	2.71167e-136	2.66055e-134	0.239976	10.3423	2.26846e-25	1.52969e-23	4	761	283	55	55	8	0	4	19	1	4	2	4
EDN1	0.872654	39.8967	0	0	2.02043	TRUE	0.580624	24.4738	1.40537e-132	1.36523e-130	0.0230391	0.97201	0.165523	0.50035	14	652	189	116	25	12	12	0	14	14	14	7
NKX2-2	0.893559	39.8808	0	0	1.30435	TRUE	0.165741	6.99383	1.33738e-12	3.75442e-11	0.641255	27.1606	9.48989e-163	2.24362e-160	1	587	30	3	32	30	30	1	10	10	1		4
WNT8A	0.869633	39.1779	0	0	1.1423	TRUE	0.695303	28.8893	8.14249e-184	9.34386e-182	0.130084	5.40266	3.28296e-08	1.11263e-06	10	833	60	2	28	11	11	24	4	4	10	10
GLDC	0.922924	39.1426	0	0	2.07759	TRUE	0.821935	32.5064	4.32924e-232	5.74004e-230	0.0693522	2.74239	0.00304971	0.0572126	14	541	42	39	8	6	28	0	14	14	14	7
CYP26C1	0.890445	38.9294	0	0	1.05472	TRUE	0.671076	26.9862	1.07309e-160	1.17639e-158	0.286037	11.4594	1.05496e-30	8.0238e-29	0	525	47	24	49	1	17	17	17	0	0	6	3
POU3F3	0.846168	38.7426	0	0	1.58554	TRUE	0.59454	25.1549	6.24383e-140	6.21942e-138	0.115904	4.91179	4.51243e-07	1.39885e-05	11	653	290	27	56	17	2	11	11	11	11	3
EBF1	0.862511	38.7074	0	0	2.13498	TRUE	0.47839	19.8152	1.10132e-87	8.82086e-86	0.311007	12.8565	3.95244e-38	3.44705e-36	0	628	19	24	49	1	17	17	17	0	0	6	0
PEX5L	0.898395	38.5299	0	0	1.49498	TRUE	0.685396	27.5096	6.73513e-167	7.46686e-165	0.192289	7.7286	5.43662e-15	2.54613e-13	4	742	80	55	55	8	0	4	19	1	4	7
PAX7	0.778788	38.2875	0	0	2.00462	TRUE	0.208453	10.1604	1.48893e-24	5.8906e-23	0.418886	20.4015	8.10153e-93	1.28207e-90	8	721	248	98	51	0	3	8	8	8	8	1	1
PBXIP1	0.892105	38.0523	0	0	1.55207	TRUE	0.110589	4.24076	1.1138e-05	0.000198151	0.813266	31.4042	8.85686e-217	2.6333e-214	1	503	0	29	59	24	24	1	10	10	1		0
SPON1	0.841736	37.9543	0	0	2.52369	TRUE	0.266123	11.4828	8.04846e-31	3.6559e-29	0.482241	20.8636	5.73493e-97	9.53699e-95	9	557	278	96	43	14	14	14	9	9	9	0	4
ASCL1	0.761946	37.7809	0	0	1.82164	TRUE	0.235257	12.2381	9.73237e-35	4.62417e-33	0.149432	7.90166	1.37605e-15	6.56986e-14	12	689	95	63	63	31	31	5	5	12	12	9
CERS4	0.885418	37.6539	0	0	1.93718	TRUE	0.653646	25.9407	1.15704e-148	1.19498e-146	0.288296	11.4757	8.73829e-31	6.67204e-29	4	482	55	84	35	8	0	4	19	1	4	0	5
2510009E07RIK	0.825199	37.6447	0	0	1.891	TRUE	0.556782	23.734	8.02977e-125	7.61199e-123	0.416601	17.7795	5.09841e-71	6.58198e-69	5	674	16	17	20	42	13	13	2	5	5	5	1
TUBB2B	0.849625	37.6428	0	0	3.01909	TRUE	0.652742	27.2056	2.78709e-163	3.07253e-161	0.0362851	1.51129	0.0653577	0.50035	13	271	271	5	48	2	27	27	6	13	13	10
GM44783	0.926044	37.5322	0	9.88079e-307	1.20715	TRUE	0.772001	29.1941	1.15196e-187	1.34553e-185	0.16384	6.182	3.16481e-10	1.21771e-08	0	781	227	9	7	15	15	2	13	0	0	10
GJB3	0.865444	37.3601	8.69065e-306	6.22396e-304	1.1239	TRUE	0.340066	14.4233	1.84569e-47	1.07792e-45	0.042533	1.79051	0.0366862	0.458823	10	822	172	38	3	11	11	24	4	4	10	4
BMP7	0.905702	37.2716	2.36835e-304	1.68997e-302	1.53797	TRUE	0.490804	18.6377	7.93947e-78	5.90137e-76	0.422707	16.0992	1.29181e-58	1.46527e-56	4	627	55	84	35	8	0	4	19	1	4	0	0
TRIB2	0.894364	36.935	6.34814e-299	4.51339e-297	1.77773	TRUE	0.213559	8.1027	2.68753e-16	8.50603e-15	0.686179	26.1056	1.5762e-150	3.59649e-148	1	281	44	51	11	30	30	1	10	10	1		6
DBX1	0.836867	36.6709	1.0619e-294	7.52266e-293	1.73585	TRUE	0.104323	4.29415	8.76803e-06	0.00015756	0.416042	17.2175	9.81939e-67	1.2273e-64	4	465	232	58	26	7	0	4	19	1	4		3
ZIC3	0.839505	36.5627	5.59547e-293	3.94964e-291	2.11733	TRUE	0.541406	22.1761	2.92349e-109	2.64367e-107	0.312856	12.7966	8.56044e-38	7.40007e-36	0	449	29	70	29	29	29	2	13	0	0	6	2
SALL1	0.845109	36.2712	2.30568e-288	1.62166e-286	2.17484	TRUE	0.367595	14.7564	1.3996e-49	8.37331e-48	0.437985	17.6394	6.13351e-70	7.86653e-68	4	698	75	55	55	8	0	4	19	1	4	7	4
MSX2	0.763507	36.1651	1.0761e-286	7.54154e-285	2.05605	TRUE	0.21185	10.2535	5.70414e-25	2.27505e-23	0.316824	15.3168	2.95434e-53	3.1507e-51	8	417	118	98	51	0	3	8	8	8	8	1	1
ARID3B	0.8937	35.8025	5.05517e-281	3.50522e-279	2.65571	TRUE	0.700034	26.0328	1.05409e-149	1.10023e-147	0.0918521	3.40607	0.000329525	0.00742466	10	468	132	22	18	4	9	9	4	4	10	4
A830018L16RIK	0.881231	35.6293	2.46417e-278	1.70262e-276	1.47087	TRUE	0.149984	5.45179	2.4933e-08	5.51589e-07	0.784628	28.6905	2.50295e-181	6.37863e-179	1	722	194	12	45	24	24	1	10	10	1		0
FAM181A	0.902276	35.4796	5.06986e-276	3.47853e-274	1.68908	TRUE	0.752816	27.7643	5.86306e-170	6.57433e-168	0.140895	5.19282	1.03569e-07	3.37596e-06	13	603	49	5	48	2	27	27	6	13	13	1
SRCIN1	0.869291	35.4456	1.6953e-275	1.15912e-273	1.74321	TRUE	0.763527	29.1113	1.29047e-186	1.4984e-184	0.0678848	2.58763	0.00483193	0.0860063	3	611	184	59	16	16	4	10	21	3	3	0
LTBP1	0.895261	35.3944	1.04291e-274	7.10591e-273	1.78519	TRUE	0.519955	19.1745	3.02031e-82	2.33337e-80	0.28932	10.6977	5.21795e-27	3.61809e-25	4	430	80	55	55	8	0	4	19	1	4	2	4
SCUBE2	0.813145	35.2041	8.65872e-272	5.87924e-270	1.95618	TRUE	0.558167	22.5979	2.27217e-113	2.0738e-111	0.118592	4.81144	7.49241e-07	2.29009e-05	3	758	243	64	2	27	1	7	7	3	3	0
PDE4D	0.917357	34.9404	9.04399e-268	6.11966e-266	1.05674	TRUE	0.0493006	1.70154	0.0444204	0.400028	0.856591	29.7625	5.96735e-195	1.60407e-192	1	816	1	112	45	24	24	1	10	10	1		0
SMOC1	0.868233	34.9302	1.29381e-267	8.72455e-266	1.74657	TRUE	0.606887	22.8159	1.59456e-115	1.46215e-113	0.052274	1.96519	0.0246961	0.336769	14	266	266	43	52	6	28	0	14	14	14	2
EFNB2	0.75887	34.9285	1.37508e-267	9.24081e-266	2.66174	TRUE	0.515726	22.104	1.44529e-108	1.29502e-106	0.272685	11.6665	9.4501e-32	7.27213e-30	0	769	66	110	10	43	7	15	15	15	0	2	4
ZIC1	0.783555	34.9091	2.70433e-267	1.81116e-265	2.29173	TRUE	0.151098	6.71675	9.29142e-12	2.51137e-10	0.424951	18.9364	2.8587e-80	4.06494e-78	8	654	118	98	51	0	3	8	8	8	8		1
IFITM1	0.841037	34.8965	4.19744e-267	2.80158e-265	3.15803	TRUE	0.394058	15.2136	1.43756e-52	8.76063e-51	0.332458	12.8407	4.847e-38	4.20852e-36	1	680	97	97	33	33	33	3	3	16	1	5	4
CELSR1	0.844615	34.6756	9.20186e-264	6.12095e-262	1.9623	TRUE	0.785391	30.1849	1.86885e-200	2.29203e-198	0.0392903	1.51047	0.0654616	0.50035	7	709	168	88	24	19	19	19	0	7	7	1
EZR	0.921893	34.3638	4.3872e-259	2.90845e-257	2.82146	TRUE	0.849922	29.6066	6.13797e-193	7.29971e-191	0.0573098	1.99502	0.0230203	0.318341	7	648	176	30	62	19	19	19	0	7	7	1
GRIN2A	0.858269	34.3231	1.77403e-258	1.17212e-256	1.53054	TRUE	0.696292	25.8759	6.2192e-148	6.38949e-146	0.115937	4.31776	7.88102e-06	0.000218431	13	604	36	109	6	28	6	6	6	13	13	1
PEG3	0.825013	34.2494	2.2222e-257	1.4633e-255	3.47766	TRUE	0.144751	5.52304	1.6659e-08	3.74884e-07	0.643434	24.662	1.36869e-134	2.88793e-132	1	413	18	12	45	24	24	1	10	10	1		0
NTRK2	0.884942	34.1876	1.84639e-256	1.21176e-254	1.48082	TRUE	0.603189	21.4767	1.28452e-102	1.13541e-100	0.0873492	3.10415	0.000954128	0.0198756	10	778	199	26	53	4	9	9	4	4	10	4
RAMP2	0.877618	34.1672	3.71545e-256	2.43028e-254	2.17865	TRUE	0.110716	4.03424	2.73897e-05	0.000465743	0.751883	27.4836	1.37915e-166	3.34112e-164	9	418	190	52	43	14	14	14	9	9	9		5
LGI1	0.881531	33.9152	1.99049e-252	1.29335e-250	1.3351	TRUE	0.736518	26.0453	7.60989e-150	7.98551e-148	0.219585	7.77298	3.83297e-15	1.8037e-13	11	823	64	8	36	36	2	11	11	11	11	3
MN1	0.764084	33.7588	3.97559e-250	2.57469e-248	2.17259	TRUE	0.635955	26.3934	8.16735e-154	8.66313e-152	0.158175	6.55628	2.7583e-11	1.116e-09	13	460	209	73	6	28	6	6	6	13	13	1
COL2A1	0.914408	33.7245	1.26345e-249	8.1555e-248	2.27042	TRUE	0.782101	26.8856	1.61984e-159	1.76589e-157	0.0458379	1.57462	0.0576722	0.50035	7	637	176	30	62	19	19	19	0	7	7	1
NCALD	0.912064	33.7102	2.04668e-249	1.31678e-247	1.88463	TRUE	0.49706	17.1192	5.33725e-66	3.67484e-64	0.438681	15.0599	1.4866e-51	1.55168e-49	0	464	78	44	44	44	17	17	17	0	0	6	5
WNT5B	0.914901	33.7004	2.85371e-249	1.83001e-247	1.62662	TRUE	0.869085	29.9457	2.50546e-197	3.01624e-195	0.0810533	2.79167	0.00262183	0.0499498	3	486	184	59	16	16	4	10	21	3	3	0
PID1	0.887375	33.5427	5.75088e-247	3.67588e-245	1.40147	TRUE	0.182399	6.36605	9.69817e-11	2.50404e-09	0.733079	25.6978	6.18973e-146	1.36473e-143	9	785	126	52	43	14	14	14	9	9	9		5
SOX1	0.869611	33.538	6.72744e-247	4.28612e-245	2.70657	TRUE	0.685856	24.785	6.50393e-136	6.34958e-134	0.399075	14.4166	2.0344e-47	1.99605e-45	13	441	220	73	6	28	6	6	6	13	13	6	2
TMEM35A	0.905195	33.3831	1.20467e-244	7.65024e-243	1.08265	TRUE	0.56144	18.8816	8.07693e-80	6.11945e-78	0.0322339	1.08263	0.139487	0.50035	10	508	199	26	53	4	9	9	4	4	10	4
NRCAM	0.864125	33.3525	3.35059e-244	2.12092e-242	1.91664	TRUE	0.537389	19.3008	2.64559e-83	2.06831e-81	0.224879	8.08583	3.08722e-16	1.51073e-14	4	524	115	40	15	32	32	12	12	1	4	2
EXOC6	0.906968	32.9621	1.41814e-238	8.94798e-237	1.56277	TRUE	0.67469	22.846	8.01611e-116	7.38498e-114	0.266003	8.96451	1.55826e-19	8.8889e-18	0	819	47	24	49	1	17	17	17	0	0	6
PYGL	0.876425	32.6286	8.05133e-234	5.03157e-232	1.33194	TRUE	0.103425	3.46867	0.000261523	0.00392344	0.772131	26.0537	6.09995e-150	1.36022e-147	1	780	194	12	45	24	24	1	10	10	1		0
DACH1	0.880521	32.5787	4.10791e-233	2.55903e-231	1.61511	TRUE	0.722945	25.1675	4.54122e-140	4.54655e-138	0.0575271	2.00078	0.0227082	0.315511	14	716	42	39	8	6	28	0	14	14	14	2
SOX6	0.818252	31.7326	2.76249e-221	1.70467e-219	1.49691	TRUE	0.734969	26.5215	2.73802e-155	2.92001e-153	0.0300431	1.08507	0.138945	0.50035	14	513	259	116	25	12	12	0	14	14	14	7
IQGAP1	0.78841	31.6124	1.24596e-219	7.66441e-218	2.28659	TRUE	0.742609	27.8938	1.58607e-171	1.78871e-169	0.0274262	1.0323	0.150965	0.50035	3	636	85	65	17	35	1	7	7	3	3	2
CAPN6	0.875149	31.6056	1.54484e-219	9.47325e-218	1.14898	TRUE	0.106499	3.53189	0.000206302	0.00313576	0.784149	26.097	1.97061e-150	4.44474e-148	9	416	126	52	43	14	14	14	9	9	9		6
ROBO2	0.851472	31.5173	2.51347e-218	1.53651e-216	1.90002	TRUE	0.398034	13.5372	4.7187e-42	2.58645e-40	0.0801338	2.72234	0.0032411	0.0603989	2	662	32	6	60	9	10	21	1	2	2	4
RFLNB	0.887695	31.4405	2.83341e-217	1.72671e-215	2.08831	TRUE	0.588334	19.428	2.23781e-84	1.76355e-82	0.317704	10.4697	5.95233e-26	4.04161e-24	5	743	16	17	20	42	13	13	2	5	5	5	1
MEX3B	0.881003	31.3628	3.25048e-216	1.97474e-214	2.28411	TRUE	0.693479	22.9095	1.86674e-116	1.72788e-114	0.0645812	2.13258	0.0164795	0.243506	11	650	197	27	56	17	2	11	11	11	11	9
MEF2C	0.885046	31.3048	2.00841e-215	1.21639e-213	1.89636	TRUE	0.56671	18.6356	8.26165e-78	6.11767e-76	0.0793698	2.59928	0.00467096	0.0834015	10	228	74	2	28	11	11	24	4	4	10	4
TSHZ1	0.904736	31.292	3.00231e-215	1.81275e-213	1.585	TRUE	0.779651	25.2872	2.20872e-141	2.23411e-139	0.0839489	2.71598	0.00330399	0.0613029	10	815	60	2	28	11	11	24	4	4	10	10
CPLX2	0.873894	31.068	3.26334e-212	1.96431e-210	1.76167	TRUE	0.164089	5.25313	7.47662e-08	1.61579e-06	0.487127	15.6624	1.3675e-55	1.47442e-53	1	555	28	117	11	30	30	1	10	10	1		0
CASZ1	0.833844	30.9337	2.10759e-210	1.26475e-208	1.85541	TRUE	0.417623	15.2909	4.39298e-53	2.7023e-51	0.0597587	2.17574	0.0147873	0.223209	0	729	198	86	29	29	29	2	13	0	0	10
PHOX2B	0.820847	30.7185	1.61134e-207	9.64004e-206	1.3115	TRUE	0.504146	18.2721	6.89725e-75	5.05017e-73	0.245114	8.86858	3.70421e-19	2.07087e-17	0	562	27	10	5	1	17	17	17	0	0	6
CNPY1	0.832352	30.6826	4.85531e-207	2.89592e-205	1.24363	TRUE	0.580085	19.9368	9.76298e-89	7.88391e-87	0.128779	4.43786	4.54299e-06	0.000129952	11	471	102	8	36	36	2	11	11	11	11	3
MEIS1	0.814526	30.6158	3.77022e-206	2.24191e-204	2.16374	TRUE	0.521396	18.2031	2.43657e-74	1.77085e-72	0.0745917	2.60095	0.00464826	0.0832234	10	485	242	2	28	11	11	24	4	4	10	4
MLLT3	0.843559	30.3833	4.56327e-203	2.70529e-201	2.65268	TRUE	0.719631	24.0942	1.43672e-128	1.37526e-126	0.0411208	1.37826	0.0840617	0.50035	7	730	231	88	24	19	19	19	0	7	7	1
FZD2	0.933874	30.2413	3.39041e-201	2.00392e-199	3.01815	TRUE	0.537455	16.0994	1.28749e-58	8.28343e-57	0.368896	11.06	9.80307e-29	7.09836e-27	4	625	103	103	15	32	32	12	12	1	4	2	4
MEG3	0.895625	30.1186	1.38142e-199	8.14043e-198	3.89665	TRUE	0.841568	26.5611	9.55889e-156	1.02499e-153	0.0292765	0.924062	0.177727	0.50035	3	704	85	65	17	35	1	7	7	3	3	7
SOX9	0.849033	30.0424	1.37246e-198	8.06344e-197	2.64099	TRUE	0.64015	21.2564	1.43847e-100	1.26014e-98	0.12554	4.17286	1.50402e-05	0.000404849	14	593	128	48	23	12	12	0	14	14	14	0
CMTM8	0.80981	29.9517	2.08943e-197	1.22391e-195	2.26612	TRUE	0.700269	24.1989	1.14211e-129	1.0986e-127	0.104654	3.61212	0.000151854	0.00360319	3	791	88	33	16	16	4	10	21	3	3	8
SORCS2	0.89161	29.8011	1.89236e-195	1.10189e-193	1.0881	TRUE	0.0517459	1.56214	0.0591273	0.497983	0.823539	25.0534	8.01254e-139	1.7278e-136	1	690	1	112	45	24	24	1	10	10	1		0
NRIP1	0.879453	29.7854	3.0207e-195	1.7537e-193	2.9734	TRUE	0.785814	25.0054	2.66968e-138	2.64581e-136	0.203685	6.46149	5.18401e-11	2.08454e-09	0	399	129	9	7	15	15	2	13	0	0	6
MYO5B	0.864333	29.7818	3.36371e-195	1.94708e-193	1.58401	TRUE	0.655849	20.9769	5.32804e-98	4.5656e-96	0.0878162	2.81259	0.00245723	0.0473656	13	530	36	109	6	28	6	6	6	13	13	1
CD24A	0.886593	29.7378	1.24834e-194	7.20473e-193	3.29904	TRUE	0.828583	25.9659	6.01585e-149	6.24598e-147	0.0276448	0.865826	0.193293	0.50035	7	493	246	30	62	19	19	19	0	7	7	9
EDARADD	0.814483	29.6742	8.27567e-194	4.76227e-192	1.57261	TRUE	0.450287	15.639	1.97382e-55	1.23351e-53	0.337458	11.7523	3.43745e-32	2.69812e-30	12	306	50	101	50	5	5	5	5	12	12	8	1
GPC4	0.903469	29.5795	1.37206e-192	7.8725e-191	1.38831	TRUE	0.640077	20.0422	1.18065e-89	9.61327e-88	0.033856	1.06213	0.144089	0.50035	14	434	99	118	52	6	28	0	14	14	14	2
GPRC5C	0.871654	29.4077	2.18674e-190	1.24739e-188	1.91053	TRUE	0.0837629	2.57367	0.00503124	0.0610186	0.673586	20.8237	1.31936e-96	2.15749e-94	1	484	0	29	59	24	24	1	10	10	1		0
CELRR	0.916715	29.3664	7.38871e-190	4.20257e-188	1.2191	TRUE	0.782004	23.1427	8.6039e-119	8.00163e-117	0.121551	3.59499	0.000162205	0.00383487	11	710	64	8	36	36	2	11	11	11	11	3
NREP	0.850882	29.3115	3.7057e-189	2.10165e-187	2.57045	TRUE	0.388578	12.407	1.19742e-35	5.85959e-34	0.492386	15.7209	5.44034e-56	5.93088e-54	0	507	130	44	44	44	17	17	17	0	0	6	5
ZIC5	0.764141	29.1979	1.03162e-187	5.83386e-186	2.48068	TRUE	0.0360967	1.37866	0.0839995	0.497983	0.486288	18.5843	2.15455e-77	2.93602e-75	8	408	59	45	37	37	3	8	8	8	8		2
FLRT2	0.87033	29.1446	4.88941e-187	2.75704e-185	1.16105	TRUE	0.180197	5.51522	1.74176e-08	3.91058e-07	0.704678	21.6353	4.18341e-104	7.39559e-102	9	594	126	52	43	14	14	14	9	9	9		6
MIP	0.936831	29.005	2.84725e-185	1.60091e-183	1.20209	TRUE	0.871892	25.2791	2.7136e-141	2.73071e-139	0.057387	1.66497	0.0479597	0.50035	14	675	51	104	25	12	12	0	14	14	14	0
AMOT	0.83652	28.9232	3.05285e-184	1.7116e-182	2.07161	TRUE	0.178159	5.80309	3.25514e-09	7.67736e-08	0.641754	20.9938	3.73259e-98	6.26023e-96	9	247	2	52	43	14	14	14	9	9	9		4
EYA2	0.892876	28.8725	1.32411e-183	7.40258e-182	1.24882	TRUE	0.700366	21.7867	1.55055e-105	1.37677e-103	0.050134	1.55964	0.0594228	0.50035	14	641	99	118	52	6	28	0	14	14	14	2
TPBG	0.890656	28.5849	5.18163e-180	2.88861e-178	2.62481	TRUE	0.680141	20.2598	1.45487e-91	1.19954e-89	0.479239	14.2729	1.61485e-46	1.53083e-44	5	621	24	46	12	26	26	26	2	5	5	5	1
NECAB2	0.826588	28.5064	4.88272e-179	2.71427e-177	1.99673	TRUE	0.482521	15.2885	4.56443e-53	2.799e-51	0.170624	5.40378	3.26253e-08	1.10762e-06	14	793	110	48	23	12	12	0	14	14	14	2
TOX2	0.870276	28.4859	8.75956e-179	4.85562e-177	1.5704	TRUE	0.140743	4.2079	1.28879e-05	0.000228043	0.725216	21.7888	1.48017e-105	2.6405e-103	9	700	2	52	43	14	14	14	9	9	9		0
CAR2	0.857472	28.4131	6.96648e-178	3.85079e-176	2.12512	TRUE	0.539794	16.8955	2.42729e-64	1.64812e-62	0.162055	5.06643	2.02675e-07	6.50916e-06	14	556	156	39	8	6	28	0	14	14	14	0
TUBB4A	0.91298	28.3711	2.29757e-177	1.26644e-175	1.97918	TRUE	0.403647	11.5383	4.23124e-31	1.93092e-29	0.44592	12.7711	1.18831e-37	1.02273e-35	4	339	147	84	35	8	0	4	19	1	4	7	5
CALB2	0.907512	28.3574	3.39007e-177	1.8634e-175	1.49524	TRUE	0.566927	16.3924	1.0839e-60	7.06623e-59	0.150065	4.34395	6.99711e-06	0.000195034	14	708	137	118	52	6	28	0	14	14	14	7
ME3	0.916157	28.3256	8.35839e-177	4.58147e-175	1.43926	TRUE	0.701013	20.0139	2.08526e-89	1.69087e-87	0.369973	10.5465	2.63538e-26	1.80189e-24	0	631	109	21	19	10	7	15	15	15	0	6	3
TSHZ3	0.891901	28.3038	1.55122e-176	8.47902e-175	1.41216	TRUE	0.691982	20.3618	1.82358e-92	1.52273e-90	0.0421913	1.23942	0.107595	0.50035	10	500	60	2	28	11	11	24	4	4	10	4
FOXD3	0.788238	28.2684	4.22366e-176	2.30225e-174	1.72662	TRUE	0.172464	6.20915	2.66366e-10	6.73571e-09	0.0384715	1.37817	0.0840748	0.50035	8	474	106	23	47	0	3	8	8	8	8
EMP1	0.783756	28.1782	5.41365e-175	2.94272e-173	1.42616	TRUE	0.377365	13.3265	8.11459e-41	4.35062e-39	0.462815	16.3605	1.83043e-60	2.15081e-58	8	770	12	106	51	0	3	8	8	8	8	9	1
PRSS23	0.885747	28.0371	2.87013e-173	1.55582e-171	2.14551	TRUE	0.667232	19.5084	4.65643e-85	3.6844e-83	0.422067	12.3295	3.14325e-35	2.58075e-33	0	657	109	21	19	10	7	15	15	15	0	6	3
BC024139	0.886425	27.9299	5.77766e-172	3.12328e-170	1.166	TRUE	0.478112	13.7903	1.45695e-43	8.16852e-42	0.461766	13.3782	4.05521e-41	3.65025e-39	1	812	275	11	13	18	18	3	3	16	1	9	0
TMTC2	0.838166	27.9058	1.1356e-171	6.12195e-170	1.5488	TRUE	0.137532	4.23911	1.12202e-05	0.000199433	0.66518	20.6021	1.31521e-94	2.11544e-92	9	771	2	52	43	14	14	14	9	9	9		6
KCTD12B	0.87939	27.8005	2.14157e-170	1.1482e-168	1.59419	TRUE	0.0718038	2.10816	0.0175087	0.183434	0.767958	22.6499	6.9971e-114	1.35945e-111	1	713	44	51	11	30	30	1	10	10	1		4
TMEM2	0.837244	27.4669	2.18152e-166	1.16643e-164	2.24418	TRUE	0.544719	16.7177	4.86652e-63	3.23715e-61	0.275763	8.44162	1.56483e-17	8.08072e-16	0	772	78	44	44	44	17	17	17	0	0	6
NAB1	0.89299	27.4514	3.34533e-166	1.78384e-164	1.42228	TRUE	0.499787	14.0571	3.48412e-45	1.98747e-43	0.0404147	1.13558	0.128066	0.50035	10	824	199	26	53	4	9	9	4	4	10	4
CITED2	0.877158	27.4311	5.83508e-166	3.10303e-164	3.61932	TRUE	0.724644	21.3273	3.16719e-101	2.78699e-99	0.0731583	2.15475	0.0155906	0.232649	7	446	3	30	62	19	19	19	0	7	7	1
ID1	0.818988	27.4074	1.11954e-165	5.93752e-164	3.72662	TRUE	0.256547	8.2917	5.5819e-17	1.79858e-15	0.387532	12.5275	2.64055e-36	2.18631e-34	8	512	248	98	51	0	3	8	8	8	8		2
AES	0.876675	27.2618	6.01877e-164	3.18346e-162	2.12745	TRUE	0.583845	16.812	9.97154e-64	6.70108e-62	0.302148	8.70062	1.65038e-18	8.97103e-17	1	585	208	53	33	33	33	3	3	16	1	5
FGFR2	0.819218	27.2471	9.00258e-164	4.74886e-162	2.20418	TRUE	0.597889	18.6621	5.03909e-78	3.75977e-76	0.146636	4.587	2.24833e-06	6.65445e-05	12	509	254	1	14	5	5	5	5	12	12	2
ITGA6	0.813388	27.2451	9.51039e-164	5.00328e-162	2.16782	TRUE	0.622485	19.3173	1.92082e-83	1.50769e-81	0.275532	8.54626	6.3573e-18	3.3178e-16	5	388	221	17	20	42	13	13	2	5	5	5
WFDC2	0.886657	27.2256	1.61847e-163	8.49177e-162	2.27984	TRUE	0.730863	21.1016	3.84307e-99	3.32214e-97	0.117528	3.38674	0.000353648	0.00789734	14	453	156	39	8	6	28	0	14	14	14	8
NEBL	0.840064	27.1911	4.14107e-163	2.16694e-161	1.59637	TRUE	0.669991	20.2074	4.21474e-91	3.4605e-89	0.246087	7.42056	5.83151e-14	2.66741e-12	13	545	76	73	6	28	6	6	6	13	13	6
GAP43	0.901139	27.1133	3.43229e-162	1.79127e-160	1.9142	TRUE	0.769291	21.8144	8.46016e-106	7.54608e-104	0.0918251	2.60533	0.00458935	0.0822437	14	634	51	104	25	12	12	0	14	14	14	0
SP8	0.82578	26.9431	3.43952e-160	1.79029e-158	2.39581	TRUE	0.220559	6.76649	6.59741e-12	1.79061e-10	0.459985	14.1438	1.02018e-45	9.57845e-44	2	232	150	34	70	13	8	18	18	2	2		2
TFAP2C	0.797238	26.931	4.75996e-160	2.47103e-158	1.52175	TRUE	0.180421	6.32467	1.26885e-10	3.25473e-09	0.239818	8.37927	2.66277e-17	1.36784e-15	8	567	118	98	51	0	3	8	8	8	8
CAMK2N1	0.900503	26.9261	5.44132e-160	2.81728e-158	1.43829	TRUE	0.546898	15.0597	1.49047e-51	9.02702e-50	0.114331	3.14573	0.00082835	0.0174033	10	517	133	2	28	11	11	24	4	4	10	4
FRMD4B	0.844057	26.6878	3.26448e-157	1.68576e-155	1.45399	TRUE	0.115478	3.30479	0.000475237	0.00693351	0.654745	18.8811	8.15436e-80	1.14295e-77	1	762	6	112	45	24	24	1	10	10	1		0
NNAT	0.901667	26.673	4.8457e-157	2.49573e-155	4.25402	TRUE	0.60198	16.5623	6.52975e-62	4.31425e-60	0.123288	3.38665	0.000353756	0.00789734	10	491	52	22	18	4	9	9	4	4	10	4
PDGFRA	0.85254	26.3113	7.11264e-153	3.64416e-151	1.65838	TRUE	0.62993	18.8162	2.78304e-79	2.0924e-77	0.0596582	1.77321	0.0380967	0.470171	0	420	198	86	29	29	29	2	13	0	0	10
TMEM108	0.889842	26.2463	3.93952e-152	2.01316e-150	2.45263	TRUE	0.651105	17.8256	2.23451e-71	1.59447e-69	0.0181488	0.496394	0.309808	0.50035	14	431	189	116	25	12	12	0	14	14	14	2
RLN1	0.894319	26.1426	5.97516e-151	3.04547e-149	1.37809	TRUE	0.62428	16.7829	1.62678e-63	1.0895e-61	0.267174	7.15955	4.04709e-13	1.80082e-11	0	423	84	24	49	1	17	17	17	0	0	6
CBLN2	0.867739	26.0736	3.62958e-150	1.84039e-148	1.01569	TRUE	0.524304	14.4536	1.18974e-47	6.96904e-46	0.0598652	1.65488	0.0489745	0.50035	14	406	137	118	52	6	28	0	14	14	14	2
SLC35F1	0.873019	26.0653	4.50831e-150	2.28007e-148	1.65399	TRUE	0.695052	19.1781	2.82189e-82	2.1887e-80	0.122823	3.38234	0.00035935	0.00799492	10	242	74	2	28	11	11	24	4	4	10	4
TCF7L1	0.871424	26.0311	1.10046e-149	5.55124e-148	2.29681	TRUE	0.438815	12.2397	9.53344e-35	4.54065e-33	0.39973	11.1767	2.65002e-29	1.96975e-27	4	714	283	55	55	8	0	4	19	1	4	2	4
WSCD1	0.877296	25.9943	2.87358e-149	1.44585e-147	1.97958	TRUE	0.455012	12.4772	4.97382e-36	2.46468e-34	0.530588	14.5507	2.889e-48	2.93735e-46	5	766	101	54	54	3	13	13	2	5	5	5	2
SPARC	0.873158	25.9049	2.92927e-148	1.47011e-146	2.96616	TRUE	0.385917	10.5863	1.72473e-26	7.09525e-25	0.31108	8.53708	6.88301e-18	3.58263e-16	4	669	205	102	15	32	32	12	12	1	4	4
ATP2B4	0.842364	25.879	5.74078e-148	2.87376e-146	1.27299	TRUE	0.600031	17.1577	2.75239e-66	1.90849e-64	0.144914	4.13468	1.77724e-05	0.000474487	0	782	93	36	5	1	17	17	17	0	0	4
SCD1	0.849042	25.8428	1.46614e-147	7.32064e-146	1.83282	TRUE	0.669085	19.0487	3.36584e-81	2.56996e-79	0.19881	5.65869	7.62666e-09	2.67724e-07	3	456	184	59	16	16	4	10	21	3	3	8
CALD1	0.881064	25.8367	1.71614e-147	8.54718e-146	3.50806	TRUE	0.0706764	1.91112	0.0279943	0.273436	0.821393	22.2964	2.0032e-110	3.7797e-108	9	407	190	52	43	14	14	14	9	9	9		5
GRIK3	0.849123	25.8215	2.54552e-147	1.26458e-145	1.2264	TRUE	0.715821	20.0913	4.39917e-90	3.59687e-88	0.0644964	1.81069	0.0350944	0.444582	0	560	260	36	5	1	17	17	17	0	0	10
PRKAR2B	0.900126	25.6743	1.13213e-145	5.61003e-144	2.25143	TRUE	0.689827	18.2221	1.72385e-74	1.25751e-72	0.0822505	2.17151	0.0149463	0.225262	11	707	197	27	56	17	2	11	11	11	11	9
MYO10	0.873281	25.5704	1.62961e-144	8.05486e-143	2.72397	TRUE	0.57459	15.7194	5.57124e-56	3.50399e-54	0.1499	4.10931	1.98424e-05	0.000526883	4	504	80	55	55	8	0	4	19	1	4	2
E330013P04RIK	0.868924	25.5292	4.67169e-144	2.30333e-142	1.12508	TRUE	0.574902	16.4925	2.07586e-61	1.36693e-59	0.122019	3.50809	0.000225669	0.00520977	14	810	53	74	23	12	12	0	14	14	14	0
RND3	0.884189	25.4235	6.94016e-143	3.40467e-141	2.21047	TRUE	0.608762	16.3166	3.75922e-60	2.44262e-58	0.212226	5.69551	6.15036e-09	2.18243e-07	13	108	143	25	9	2	27	27	6	13	13	9
POU3F4	0.889441	25.4048	1.11588e-142	5.46058e-141	1.63549	TRUE	0.479073	12.7649	1.28713e-37	6.57741e-36	0.40497	10.8111	1.5257e-27	1.06544e-25	1	277	208	53	33	33	33	3	3	16	1	3	6
ETV5	0.805815	25.3224	9.04182e-142	4.41362e-140	1.65374	TRUE	0.462669	13.5326	5.01708e-42	2.74235e-40	0.0963338	2.82398	0.00237159	0.045989	2	760	79	87	21	13	8	18	18	2	2	5
PTH1R	0.88418	25.3022	1.50885e-141	7.34694e-140	1.6886	TRUE	0.247441	6.6163	1.84151e-11	4.87664e-10	0.625652	16.7669	2.13004e-63	2.54864e-61	1	751	68	53	33	33	33	3	3	16	1		5
CCND2	0.830345	25.24	7.2916e-141	3.54166e-139	4.02468	TRUE	0.290832	8.34936	3.43182e-17	1.11126e-15	0.0866642	2.48629	0.00645405	0.110224	2	245	245	6	60	9	10	21	1	2	2
UCP2	0.9299	24.9981	3.20273e-138	1.55178e-136	1.83363	TRUE	0.844611	21.1899	5.91846e-100	5.16168e-98	0.035674	0.89543	0.185279	0.50035	14	723	51	104	25	12	12	0	14	14	14	2
COL1A2	0.855435	24.8976	3.95149e-137	1.90516e-135	1.78174	TRUE	0.423388	11.4241	1.58523e-30	7.1675e-29	0.0624049	1.68148	0.0463353	0.50035	10	619	17	14	3	11	11	24	4	4	10	4
AUTS2	0.890236	24.8455	1.44616e-136	6.93838e-135	2.79908	TRUE	0.755364	19.5401	2.50595e-85	1.99086e-83	0.131061	3.38841	0.000351493	0.0078647	7	462	168	88	24	19	19	19	0	7	7	1
PDZPH1	0.853126	24.819	2.79624e-136	1.33831e-134	2.13897	TRUE	0.306706	8.32868	4.08747e-17	1.32139e-15	0.19565	5.30865	5.52199e-08	1.83969e-06	13	789	196	115	41	41	6	6	6	13	13
FAM13C	0.837472	24.7428	1.8536e-135	8.82844e-134	1.64374	TRUE	0.360039	9.64292	2.63348e-22	9.78729e-21	0.535497	14.3981	2.65774e-47	2.58182e-45	1	510	94	11	13	18	18	3	3	16	1		0
TWIST1	0.80833	24.6959	5.91096e-135	2.80849e-133	2.17391	TRUE	0.136302	4.07258	2.32476e-05	0.000399815	0.297838	8.88989	3.05854e-19	1.71971e-17	8	313	8	23	47	0	3	8	8	8	8
SPRY1	0.860514	24.6702	1.11689e-134	5.29391e-133	2.12694	TRUE	0.560622	15.0542	1.61935e-51	9.7774e-50	0.128128	3.44155	0.0002892	0.00655308	2	558	79	87	21	13	8	18	18	2	2	5
CRABP2	0.757741	24.6341	2.72342e-134	1.28775e-132	4.21893	TRUE	0.155539	4.70526	1.26771e-06	2.45814e-05	0.568059	17.2264	8.42066e-67	1.05922e-64	8	767	191	95	37	37	3	8	8	8	8		2
FLRT3	0.862241	24.6136	4.51291e-134	2.12877e-132	2.80981	TRUE	0.64441	17.0172	3.06099e-65	2.08562e-63	0.160556	4.23358	1.15e-05	0.000312555	2	668	21	99	21	13	8	18	18	2	2	5
5930412G12RIK	0.911984	24.5791	1.05559e-133	4.96734e-132	1.26764	TRUE	0.804372	20.2601	1.44735e-91	1.19954e-89	0.0763314	1.92258	0.0272663	0.364473	13	264	148	56	6	28	6	6	6	13	13	1
PLS3	0.913424	24.5683	1.37835e-133	6.47064e-132	2.65799	TRUE	0.825635	20.8188	1.46341e-96	1.24314e-94	0.0421522	1.06463	0.143521	0.50035	3	256	85	65	17	35	1	7	7	3	3	2
SERPINE2	0.898726	24.5139	5.25039e-133	2.45891e-131	2.05545	TRUE	0.677169	17.0259	2.64041e-65	1.80532e-63	0.154234	3.8751	5.32902e-05	0.00134757	2	600	21	99	21	13	8	18	18	2	2	5
GMPR	0.894414	24.456	2.17393e-132	1.01569e-130	1.11045	TRUE	0.113294	2.86304	0.00209802	0.027575	0.831027	21.0677	7.87026e-99	1.33136e-96	1	333	194	12	45	24	24	1	10	10	1		5
1700027J19RIK	0.865391	24.4101	6.68243e-132	3.11471e-130	2.03578	TRUE	0.777379	20.6665	3.47013e-95	2.9225e-93	0.169438	4.50159	3.37232e-06	9.76033e-05	3	490	58	59	16	16	4	10	21	3	3	8
GRRP1	0.835095	24.3031	9.08224e-131	4.22324e-129	1.94743	TRUE	0.575661	16.0089	5.54036e-58	3.55289e-56	0.403646	11.2272	1.49959e-29	1.11887e-27	12	684	73	80	14	5	5	5	5	12	12	8	1
CACNA2D1	0.908714	24.1544	3.35496e-129	1.55637e-127	1.0161	TRUE	0.726167	18.0806	2.26463e-73	1.62779e-71	0.0465842	1.16037	0.122948	0.50035	14	804	137	118	52	6	28	0	14	14	14	2
PIM1	0.837393	24.1518	3.57299e-129	1.6536e-127	2.41593	TRUE	0.454735	12.43	8.9825e-36	4.41763e-34	0.401449	10.9835	2.29514e-28	1.6437e-26	1	540	68	53	33	33	33	3	3	16	1	3	5
SOX13	0.797626	23.8963	1.67162e-126	7.70003e-125	2.08261	TRUE	0.685419	19.2398	8.59328e-83	6.6915e-81	0.0811112	2.27729	0.0113846	0.179006	13	249	144	109	6	28	6	6	6	13	13	1
CXXC4	0.849894	23.7563	4.73193e-125	2.17458e-123	2.09423	TRUE	0.245887	6.40436	7.55028e-11	1.95461e-09	0.516589	13.471	1.15878e-41	1.05762e-39	1	349	125	51	11	30	30	1	10	10	1		5
DUSP5	0.844868	23.7047	1.61256e-124	7.37605e-123	2.04148	TRUE	0.524886	13.8562	5.8381e-44	3.29198e-42	0.146547	3.86963	5.45003e-05	0.0013764	14	656	4	41	8	6	28	0	14	14	14	2
ISM1	0.828198	23.6886	2.36093e-124	1.07741e-122	1.2366	TRUE	0.590168	15.4911	1.9912e-54	1.2326e-52	0.0827463	2.17864	0.0146791	0.221746	2	830	41	49	22	45	10	21	1	2	2	3
DSEL	0.846237	23.4905	2.54987e-122	1.16093e-120	1.67292	TRUE	0.05872	1.47249	0.0704446	0.497983	0.791206	19.9349	1.01428e-88	1.56718e-86	1	786	6	112	45	24	24	1	10	10	1		0
FHAD1	0.891575	23.4808	3.20664e-122	1.45657e-120	1.03955	TRUE	0.400594	9.61817	3.35048e-22	1.24284e-20	0.470227	11.3224	5.0806e-30	3.80521e-28	0	664	119	10	5	1	17	17	17	0	0		0
LRRC7	0.865791	23.2273	1.20692e-119	5.4696e-118	1.12853	TRUE	0.455785	11.2038	1.95203e-29	8.68585e-28	0.0632071	1.5546	0.0600207	0.50035	10	768	17	14	3	11	11	24	4	4	10	4
ST8SIA4	0.834575	23.186	3.15023e-119	1.42108e-117	1.36384	TRUE	0.672243	17.2587	4.81164e-67	3.34818e-65	0.114033	2.92274	0.00173485	0.0347732	10	727	74	2	28	11	11	24	4	4	10	4
COL9A2	0.895696	23.182	3.45846e-119	1.55654e-117	1.02566	TRUE	0.532576	12.8131	6.92568e-38	3.54837e-36	0.103612	2.4991	0.00622537	0.106971	14	414	137	118	52	6	28	0	14	14	14	2
CCNJL	0.910691	23.1631	5.36299e-119	2.40819e-117	2.05346	TRUE	0.700325	16.4476	4.3642e-61	2.86417e-59	0.270316	6.34219	1.13262e-10	4.46293e-09	11	288	237	8	36	36	2	11	11	11	11	3
SOX21	0.803834	23.1262	1.26316e-118	5.65914e-117	2.93857	TRUE	0.49779	13.3846	3.71988e-41	2.01089e-39	0.10177	2.73727	0.00309753	0.0580543	13	325	162	25	9	2	27	27	6	13	13	3
VEGFC	0.889819	23.0355	1.02694e-117	4.59036e-116	1.38907	TRUE	0.689578	16.6027	3.3302e-62	2.20772e-60	0.111613	2.685	0.00362651	0.0668197	14	473	139	74	23	12	12	0	14	14	14	0
TCN2	0.874382	22.9486	7.60954e-117	3.39368e-115	1.38437	TRUE	0.246809	5.79118	3.49469e-09	8.22257e-08	0.088972	2.09261	0.0181918	0.264037	10	551	141	14	3	11	11	24	4	4	10
PCYT1B	0.852394	22.8732	4.29401e-116	1.91069e-114	1.22684	TRUE	0.0324485	0.784251	0.216446	0.497983	0.792088	19.2357	9.29523e-83	1.38182e-80	1	660	1	112	45	24	24	1	10	10	1		0
VSTM2B	0.866339	22.7744	4.11257e-115	1.82169e-113	2.47265	TRUE	0.521769	12.8165	6.62777e-38	3.40463e-36	0.196313	4.8215	7.12421e-07	2.18094e-05	13	226	143	25	9	2	27	27	6	13	13	1
RBM24	0.829167	22.736	9.88023e-115	4.36666e-113	1.56537	TRUE	0.230975	5.83351	2.71366e-09	6.47025e-08	0.491339	12.4466	7.29684e-36	6.01621e-34	4	208	112	58	26	7	0	4	19	1	4		6
RPRM	0.871324	22.7345	1.02058e-114	4.50039e-113	2.145	TRUE	0.595582	14.4092	2.26407e-47	1.31833e-45	0.148004	3.57552	0.000174767	0.00411205	4	624	9	16	4	21	21	12	12	1	4	4
WNT5A	0.809669	22.7045	2.02283e-114	8.89999e-113	1.95779	TRUE	0.526352	13.6819	6.51669e-43	3.61235e-41	0.318135	8.26382	7.05391e-17	3.51317e-15	12	263	206	31	64	5	5	5	5	12	12	5
CNKSR2	0.847069	22.6907	2.76924e-114	1.21568e-112	1.47008	TRUE	0.588862	14.6782	4.4491e-49	2.6376e-47	0.273299	6.83062	4.22746e-12	1.78016e-10	4	357	55	84	35	8	0	4	19	1	4	0
TRIL	0.84403	22.6393	8.8878e-114	3.89298e-112	1.57142	TRUE	0.505171	12.6705	4.30959e-37	2.1852e-35	0.380706	9.57121	5.28316e-22	3.26011e-20	4	696	55	84	35	8	0	4	19	1	4	0
ANXA5	0.881225	22.5642	4.87001e-113	2.12838e-111	1.51281	TRUE	0.27878	6.53993	3.07736e-11	8.05161e-10	0.27549	6.47065	4.87906e-11	1.96595e-09	1	424	28	117	11	30	30	1	10	10	1
SLC39A8	0.889798	22.5141	1.51136e-112	6.59054e-111	1.12138	TRUE	0.110862	2.52836	0.0057299	0.0683512	0.835855	19.1821	2.61218e-82	3.85405e-80	1	224	6	112	45	24	24	1	10	10	1		0
LPAR4	0.808592	22.4905	2.56825e-112	1.11745e-110	2.77681	TRUE	0.480709	12.4221	9.91895e-36	4.86599e-34	0.451628	11.6555	1.07528e-31	8.24228e-30	0	447	66	110	10	43	7	15	15	15	0	6	2
ILDR2	0.744041	22.4592	5.1986e-112	2.2569e-110	2.8291	TRUE	0.60681	17.0669	1.30784e-65	8.97335e-64	0.0512212	1.44018	0.0749085	0.50035	7	293	231	88	24	19	19	19	0	7	7	1
DEPDC7	0.872636	22.4514	6.20255e-112	2.68681e-110	1.61837	TRUE	0.525466	12.6117	9.09653e-37	4.58872e-35	0.328435	7.89844	1.41203e-15	6.72531e-14	4	568	147	84	35	8	0	4	19	1	4	0
ARID3A	0.877209	22.3744	3.49284e-111	1.50969e-109	2.16798	TRUE	0.51864	12.3743	1.79941e-35	8.78355e-34	0.294539	7.04416	9.32941e-13	4.0413e-11	4	546	75	55	55	8	0	4	19	1	4	2
NTN1	0.740472	22.3159	1.29528e-110	5.57398e-109	1.8472	TRUE	0.106901	2.98304	0.00142699	0.0193918	0.546892	15.3268	2.53313e-53	2.71626e-51	1	401	204	11	13	18	18	3	3	16	1		0
RHPN2	0.809315	22.2963	2.0063e-110	8.61481e-109	1.62103	TRUE	0.625678	16.1206	9.1416e-59	5.90084e-57	0.308149	7.9172	1.21455e-15	5.84145e-14	0	347	47	24	49	1	17	17	17	0	0	6
GLIPR2	0.895721	22.2703	3.58228e-110	1.53483e-108	1.28047	TRUE	0.0591705	1.35095	0.0883564	0.497983	0.826978	19.0173	6.13321e-81	8.78481e-79	1	311	1	112	45	24	24	1	10	10	1		6
KCNA5	0.841631	22.2131	1.28404e-109	5.4895e-108	1.20334	TRUE	0.508122	12.4793	4.8426e-36	2.40573e-34	0.516163	12.7173	2.37048e-37	2.02243e-35	5	854	91	54	54	3	13	13	2	5	5	5	1
FREM2	0.732242	22.1586	4.30875e-109	1.83806e-107	1.91746	TRUE	0.459432	12.9929	6.71545e-39	3.50471e-37	0.337596	9.55617	6.10999e-22	3.7585e-20	2	428	155	34	70	13	8	18	18	2	2	8
PLA2G7	0.865022	22.1582	4.34682e-109	1.85027e-107	1.97357	TRUE	0.265636	6.34671	1.09984e-10	2.83603e-09	0.159611	3.81182	6.89723e-05	0.00171539	10	322	142	38	3	11	11	24	4	4	10
NPAS3	0.773151	22.1197	1.02085e-108	4.32658e-107	1.45554	TRUE	0.659632	17.6209	8.5066e-70	6.04801e-68	0.106439	2.83875	0.00226456	0.0441562	0	692	260	36	5	1	17	17	17	0	0	1
ELMOD1	0.886859	22.1134	1.17488e-108	4.96867e-107	1.20721	TRUE	0.720275	16.7283	4.07824e-63	2.72201e-61	0.0691095	1.60558	0.0541829	0.50035	2	353	41	49	22	45	10	21	1	2	2	3
CDON	0.727049	22.1069	1.35613e-108	5.72287e-107	1.98146	TRUE	0.276579	8.35823	3.18318e-17	1.03416e-15	0.188675	5.68868	6.40141e-09	2.25926e-07	0	290	226	86	29	29	29	2	13	0	0
NRIP3	0.773958	22.0357	6.55031e-108	2.7583e-106	1.32112	TRUE	0.569628	15.1459	4.02988e-52	2.44825e-50	0.0715477	1.90868	0.028152	0.373385	3	470	243	64	2	27	1	7	7	3	3	0
ZFHX4	0.739351	21.9964	1.55933e-107	6.5522e-106	2.22344	TRUE	0.250237	7.04992	8.95119e-13	2.53097e-11	0.465127	13.1176	1.30551e-39	1.14879e-37	5	855	101	54	54	3	13	13	2	5	5		2
NFIA	0.83303	21.9905	1.77437e-107	7.43983e-106	1.06035	TRUE	0.310534	7.31154	1.32047e-13	3.83875e-12	0.559796	13.2936	1.26091e-40	1.12467e-38	1	526	179	11	13	18	18	3	3	16	1		0
NOTUM	0.872187	21.8057	1.02496e-105	4.27932e-104	1.17741	TRUE	0.602043	13.9073	2.86085e-44	1.6272e-42	0.123319	2.85456	0.00215481	0.0423262	2	229	41	49	22	45	10	21	1	2	2	3
WNT3A	0.784855	21.7218	6.38761e-105	2.66123e-103	1.07465	TRUE	0.296061	8.16445	1.61446e-16	5.12632e-15	0.415602	11.4567	1.08834e-30	8.24575e-29	8	270	118	98	51	0	3	8	8	8	8		1
MIAT	0.734691	21.7029	9.63525e-105	4.00577e-103	1.92986	TRUE	0.629605	17.5269	4.46753e-69	3.14216e-67	0.0477011	1.32936	0.0918646	0.50035	4	734	187	57	57	7	0	4	19	1	4	0
CHD3	0.878677	21.6719	1.88846e-104	7.83453e-103	2.35128	TRUE	0.732515	16.8147	9.52058e-64	6.42001e-62	0.0909886	2.08829	0.0183858	0.266065	13	356	209	73	6	28	6	6	6	13	13	1
H19	0.817756	21.6266	5.04951e-104	2.09043e-102	2.04117	TRUE	0.170506	4.17148	1.51316e-05	0.000265827	0.644599	15.8346	8.97729e-57	9.84142e-55	9	366	126	52	43	14	14	14	9	9	9		5
ZFP503	0.820371	21.5705	1.69953e-103	7.02104e-102	2.96774	TRUE	0.324788	7.94772	9.4989e-16	2.92617e-14	0.405036	9.92469	1.62563e-23	1.05279e-21	12	425	212	1	14	5	5	5	5	12	12
PLCD4	0.8927	21.5533	2.46637e-103	1.01463e-101	1.04447	TRUE	0.349528	7.67492	8.27627e-15	2.49088e-13	0.574508	12.6732	4.16106e-37	3.53474e-35	1	576	179	11	13	18	18	3	3	16	1		0
ITGB5	0.872147	21.5401	3.27756e-103	1.34551e-101	1.57983	TRUE	0.0841973	1.90311	0.0285133	0.2774	0.591201	13.4045	2.84438e-41	2.58404e-39	1	344	6	112	45	24	24	1	10	10	1		5
NEFM	0.876807	21.5002	7.74677e-103	3.17359e-101	1.76357	TRUE	0.26167	5.76763	4.01982e-09	9.42424e-08	0.0410634	0.905558	0.182585	0.50035	4	422	71	37	4	21	21	12	12	1	4
ITGA8	0.876779	21.4184	4.49879e-102	1.83916e-100	1.12437	TRUE	0.43023	9.86295	3.01254e-23	1.14564e-21	0.0225343	0.515657	0.303047	0.50035	10	644	154	2	28	11	11	24	4	4	10
FILIP1	0.757833	21.4077	5.66202e-102	2.30989e-100	1.46477	TRUE	0.411789	10.9172	4.7683e-28	2.05194e-26	0.13854	3.67147	0.000120578	0.00291034	14	389	23	48	23	12	12	0	14	14	14	0
CD47	0.917432	21.3495	1.97142e-101	8.02598e-100	2.39046	TRUE	0.566021	12.304	4.30985e-35	2.07285e-33	0.149188	3.24598	0.000585241	0.0125237	4	236	80	55	55	8	0	4	19	1	4	7
PTX3	0.830726	21.2865	7.57218e-101	3.07638e-99	1.33587	TRUE	0.516344	12.3713	1.86905e-35	9.10084e-34	0.330364	7.92226	1.16616e-15	5.62251e-14	0	206	67	10	5	1	17	17	17	0	0	1
KCTD12	0.793234	21.2797	8.75056e-101	3.54777e-99	1.80378	TRUE	0.365702	9.52779	8.03306e-22	2.96302e-20	0.352192	9.15846	2.63226e-20	1.55113e-18	8	738	12	106	51	0	3	8	8	8	8
NEFH	0.829388	21.258	1.39043e-100	5.62565e-99	1.69867	TRUE	0.714522	17.1382	3.85176e-66	2.66138e-64	0.0662205	1.58905	0.0560246	0.50035	14	802	173	35	25	12	12	0	14	14	14	0
ADA	0.862156	21.2457	1.80476e-100	7.28698e-99	1.27375	TRUE	0.611148	14.2798	1.46233e-46	8.46471e-45	0.137693	3.21559	0.000650884	0.013793	14	354	53	74	23	12	12	0	14	14	14	0
RBFOX3	0.798011	21.1839	6.72738e-100	2.71071e-98	1.50105	TRUE	0.566672	14.0996	1.90879e-45	1.09202e-43	0.232116	5.77115	3.93655e-09	1.41478e-07	5	523	213	32	65	3	13	13	2	5	5	5
GALNT7	0.876531	21.1497	1.38917e-99	5.58599e-98	2.04166	TRUE	0.60835	13.8216	9.43617e-44	5.30562e-42	0.199759	4.53574	2.87007e-06	8.41016e-05	7	272	90	30	62	19	19	19	0	7	7	9
TNFAIP6	0.877757	21.1414	1.65467e-99	6.64e-98	1.02223	TRUE	0.470331	10.5397	2.83454e-26	1.15879e-24	0.0643706	1.4404	0.0748764	0.50035	10	405	172	38	3	11	11	24	4	4	10	4
ARHGAP24	0.845511	21.0159	2.34758e-98	9.40134e-97	1.45928	TRUE	0.156887	3.52585	0.000211063	0.00320069	0.479689	10.8378	1.13971e-27	8.01593e-26	1	598	6	112	45	24	24	1	10	10	1		0
STK26	0.845345	21.0093	2.69843e-98	1.07844e-96	1.55256	TRUE	0.559285	13.1045	1.55223e-39	8.23228e-38	0.137183	3.22033	0.000640212	0.0135815	14	360	128	48	23	12	12	0	14	14	14	0
KIF21A	0.912025	20.9813	4.85961e-98	1.93428e-96	2.8812	TRUE	0.506248	10.8187	1.4044e-27	5.90119e-26	0.4401	9.42842	2.0816e-21	1.26462e-19	4	763	147	84	35	8	0	4	19	1	4	8
NCAM1	0.837624	20.9613	7.40433e-98	2.93525e-96	1.93534	TRUE	0.627519	14.6233	9.97491e-49	5.89571e-47	0.24998	5.81983	2.94531e-09	1.07029e-07	0	426	78	44	44	44	17	17	17	0	0	6
EPS8	0.779522	20.9588	7.80571e-98	3.08813e-96	1.58063	TRUE	0.572636	14.3283	7.27833e-47	4.22552e-45	0.0286577	0.717239	0.236613	0.50035	2	394	46	18	22	45	10	21	1	2	2	9
SCRN1	0.905052	20.955	8.44294e-98	3.33352e-96	1.51155	TRUE	0.537627	11.5414	4.0789e-31	1.86613e-29	0.350967	7.55533	2.089e-14	9.64528e-13	1	686	92	78	13	18	18	3	3	16	1	1
COLEC12	0.87098	20.8794	4.12281e-97	1.62454e-95	1.93728	TRUE	0.424777	9.41959	2.26426e-21	8.22808e-20	0.378607	8.37833	2.68419e-17	1.37525e-15	0	602	19	24	49	1	17	17	17	0	0
PLTP	0.895383	20.7308	9.13906e-96	3.58671e-94	1.48474	TRUE	0.48677	10.3668	1.75468e-25	7.08481e-24	0.446947	9.54697	6.6774e-22	4.0947e-20	1	404	275	11	13	18	18	3	3	16	1	9
KLHDC8B	0.872777	20.6698	3.23917e-95	1.26618e-93	1.20439	TRUE	0.201759	4.3117	8.10013e-06	0.000145825	0.789147	16.9512	9.43586e-65	1.15725e-62	1	670	293	12	45	24	24	1	10	10	1		0
CACNG4	0.864548	20.5594	3.17132e-94	1.23719e-92	2.08877	TRUE	0.457064	10.1273	2.08967e-24	8.20111e-23	0.220303	4.87367	5.47726e-07	1.68465e-05	10	522	105	38	3	11	11	24	4	4	10	10
MAOB	0.855313	20.539	4.82428e-94	1.87831e-92	1.48025	TRUE	0.65148	14.5884	1.66476e-48	9.8101e-47	0.124449	2.78986	0.00263655	0.0501813	14	788	23	48	23	12	12	0	14	14	14	0
NDNF	0.756165	20.5297	5.84608e-94	2.27164e-92	2.06702	TRUE	0.214198	5.30278	5.70251e-08	1.23784e-06	0.181053	4.49117	3.54159e-06	0.000102051	2	301	32	6	60	9	10	21	1	2	2
NTF3	0.829607	20.5026	1.02064e-93	3.95811e-92	1.42445	TRUE	0.388687	9.039	7.90587e-20	2.77526e-18	0.516348	12.0525	9.41001e-34	7.53684e-32	5	341	91	54	54	3	13	13	2	5	5		1
BTBD17	0.803824	20.4809	1.59369e-93	6.16822e-92	2.14699	TRUE	0.453184	10.8838	6.8862e-28	2.93119e-26	0.233524	5.62779	9.12662e-09	3.19806e-07	2	443	185	119	30	9	10	21	1	2	2	9
PRSS35	0.800715	20.3772	1.33213e-92	5.14575e-91	1.0569	TRUE	0.538381	12.5248	2.73098e-36	1.36015e-34	0.186708	4.34535	6.9528e-06	0.000194075	5	348	213	32	65	3	13	13	2	5	5	3
SYT7	0.806144	20.373	1.45214e-92	5.59829e-91	1.62542	TRUE	0.598134	13.8922	3.53331e-44	2.00388e-42	0.339812	7.90298	1.36161e-15	6.51682e-14	5	321	122	32	65	3	13	13	2	5	5	3
C130026L21RIK	0.917321	20.3563	2.04317e-92	7.86141e-91	1.61497	TRUE	0.843541	17.5434	3.34095e-69	2.35826e-67	0.034979	0.728463	0.233165	0.50035	13	642	148	56	6	28	6	6	6	13	13	1
FHL1	0.891558	20.2991	6.55286e-92	2.51146e-90	2.63527	TRUE	0.6152	13.1973	4.54725e-40	2.42475e-38	0.475377	10.179	1.23089e-24	8.13258e-23	0	176	82	21	19	10	7	15	15	15	0	6	3
BCL2	0.868603	20.2922	7.5404e-92	2.88431e-90	1.7968	TRUE	0.720331	15.8276	1.0034e-56	6.37208e-55	0.0822392	1.80382	0.0356301	0.449049	0	390	93	36	5	1	17	17	17	0	0	10
AKAP12	0.681142	20.2744	1.08103e-91	4.12707e-90	2.15693	TRUE	0.582998	16.2612	9.29965e-60	6.02268e-58	0.0440116	1.22909	0.109519	0.50035	14	371	61	116	25	12	12	0	14	14	14	2
SPRED1	0.718709	20.2727	1.11953e-91	4.26575e-90	2.66308	TRUE	0.511654	13.4619	1.31098e-41	7.12613e-40	0.0504942	1.32976	0.0917986	0.50035	2	350	219	69	69	23	23	23	1	2	2	1
DACH2	0.839942	20.2389	2.22375e-91	8.45671e-90	1.36248	TRUE	0.386141	8.61849	3.39221e-18	1.13982e-16	0.499432	11.1094	5.6439e-29	4.11711e-27	0	207	54	82	10	43	7	15	15	15	0		3
SLCO3A1	0.862211	20.2369	2.31779e-91	8.79729e-90	1.58805	TRUE	0.587766	12.6713	4.26687e-37	2.16914e-35	0.244956	5.28396	6.32088e-08	2.09165e-06	2	400	21	99	21	13	8	18	18	2	2	5
2700033N17RIK	0.905451	20.2013	4.7715e-91	1.80755e-89	1.32052	TRUE	0.627887	12.9747	8.50839e-39	4.42865e-37	0.071724	1.47866	0.0696162	0.50035	10	601	74	2	28	11	11	24	4	4	10	4
LARGE2	0.8746	20.1601	1.09709e-90	4.14801e-89	1.76755	TRUE	0.579916	12.4471	7.24687e-36	3.573e-34	0.392613	8.41971	1.88714e-17	9.71953e-16	5	737	70	32	65	3	13	13	2	5	5	5
ALPL	0.868515	20.1381	1.71178e-90	6.44728e-89	1.70543	TRUE	0.734281	15.8465	7.42897e-57	4.73308e-55	0.13372	2.88332	0.00196757	0.0388817	14	626	173	35	25	12	12	0	14	14	14	0
S100A10	0.864927	20.1248	2.23894e-90	8.41663e-89	2.06664	TRUE	0.493202	10.6105	1.33227e-26	5.49224e-25	0.0907865	1.95532	0.0252724	0.343407	4	409	72	37	4	21	21	12	12	1	4	4
PAM	0.785544	20.075	6.10805e-90	2.29175e-88	2.19635	TRUE	0.493582	11.6652	9.60063e-32	4.44323e-30	0.173388	4.09864	2.07792e-05	0.000551015	2	574	21	99	21	13	8	18	18	2	2	5
PEAK1	0.792998	19.9904	3.33672e-89	1.24955e-87	1.81686	TRUE	0.697856	16.4271	6.11583e-61	4.00036e-59	0.160585	3.77427	8.02381e-05	0.00198802	0	355	69	36	5	1	17	17	17	0	0	6
IFITM3	0.796228	19.976	4.45e-89	1.66012e-87	2.34675	TRUE	0.425389	9.94786	1.28839e-23	4.98659e-22	0.249745	5.8502	2.45485e-09	8.98723e-08	1	262	262	78	13	18	18	3	3	16	1
9430076C15RIK	0.800132	19.8814	2.94972e-88	1.09834e-86	1.31215	TRUE	0.598998	13.7174	3.99404e-43	2.22656e-41	0.0790625	1.80807	0.0352976	0.4465	14	618	284	35	25	12	12	0	14	14	14	2
OLFML3	0.887974	19.8434	6.2842e-88	2.32669e-86	1.56834	TRUE	0.296859	6.04345	7.54275e-10	1.84668e-08	0.522099	10.679	6.38256e-27	4.41003e-25	1	312	26	78	13	18	18	3	3	16	1		0
LIMCH1	0.866909	19.8306	8.10274e-88	2.99435e-86	1.27978	TRUE	0.0549313	1.13327	0.128551	0.497983	0.694648	14.4323	1.62091e-47	1.60642e-45	1	682	6	112	45	24	24	1	10	10	1		0
NOG	0.765633	19.8155	1.09479e-87	4.03817e-86	1.54228	TRUE	0.266843	6.92284	2.21341e-12	6.1347e-11	0.506799	13.1702	6.5104e-40	5.7807e-38	8	300	12	106	51	0	3	8	8	8	8		1
OAF	0.870349	19.6539	2.67686e-86	9.85515e-85	1.52785	TRUE	0.796701	16.8698	3.75206e-64	2.53885e-62	0.0592131	1.25179	0.105323	0.50035	14	335	173	35	25	12	12	0	14	14	14	0
LMX1A	0.78534	19.5568	1.80562e-85	6.63514e-84	1.22692	TRUE	0.237403	5.82172	2.91229e-09	6.91864e-08	0.516248	12.6654	4.59936e-37	3.89023e-35	8	480	8	23	47	0	3	8	8	8	8		0
CXXC5	0.862556	19.5311	2.98806e-85	1.09598e-83	2.1412	TRUE	0.598548	12.65	5.59365e-37	2.82897e-35	0.364345	7.70026	6.78927e-15	3.16451e-13	11	553	237	8	36	36	2	11	11	11	11	5
ZFP536	0.888222	19.3958	4.1879e-84	1.53034e-82	1.05402	TRUE	0.107649	2.14269	0.0160689	0.170075	0.810019	16.2037	2.37386e-59	2.74013e-57	1	463	6	112	45	24	24	1	10	10	1		0
GSC2	0.847992	19.3937	4.35959e-84	1.59011e-82	1.23766	TRUE	0.494107	10.486	5.01064e-26	2.04415e-24	0.334503	7.08903	6.75258e-13	2.97098e-11	12	373	180	31	64	5	5	5	5	12	12	5
SPINT2	0.864692	19.3542	9.38964e-84	3.40578e-82	1.87858	TRUE	0.701383	14.7107	2.75159e-49	1.6362e-47	0.114369	2.40112	0.00817241	0.134423	14	797	51	104	25	12	12	0	14	14	14	0
AFF1	0.763267	19.3387	1.26951e-83	4.59622e-82	1.66846	TRUE	0.657903	15.664	1.33195e-55	8.35045e-54	0.0869533	2.06363	0.0195262	0.278867	0	596	69	36	5	1	17	17	17	0	0	10
PLEKHA1	0.75004	19.338	1.28598e-83	4.6473e-82	2.73802	TRUE	0.557899	13.3804	3.93616e-41	2.11614e-39	0.209953	5.03138	2.43482e-07	7.74367e-06	5	282	25	17	20	42	13	13	2	5	5	8
UBASH3B	0.859171	19.3156	1.98481e-83	7.14642e-82	1.47945	TRUE	0.346103	6.94403	1.90539e-12	5.31857e-11	0.0431537	0.867346	0.192876	0.50035	10	678	141	14	3	11	11	24	4	4	10
ARHGAP29	0.771099	19.2883	3.36495e-83	1.20935e-81	2.22625	TRUE	0.585327	13.5931	2.19882e-42	1.21201e-40	0.185896	4.31548	7.96295e-06	0.000220391	13	728	209	73	6	28	6	6	6	13	13	1
NRP1	0.823681	19.2752	4.33886e-83	1.55652e-81	1.6625	TRUE	0.530076	11.5241	4.98682e-31	2.27045e-29	0.201823	4.38947	5.68137e-06	0.00016018	2	255	14	99	21	13	8	18	18	2	2	5
RASGRP2	0.897059	19.2399	8.57737e-83	3.07142e-81	1.75558	TRUE	0.750542	15.0527	1.6568e-51	9.9728e-50	0.05435	1.08925	0.138022	0.50035	14	285	288	118	52	6	28	0	14	14	14	0
SORBS2	0.787932	19.1931	2.11396e-82	7.54222e-81	2.05694	TRUE	0.60185	13.5142	6.4478e-42	3.51459e-40	0.313767	7.04322	9.39253e-13	4.05968e-11	5	412	25	17	20	42	13	13	2	5	5	8
RAI14	0.758698	19.189	2.28858e-82	8.1504e-81	2.0484	TRUE	0.575131	13.6385	1.18212e-42	6.53428e-41	0.136781	3.23879	0.000600185	0.0128155	13	340	209	73	6	28	6	6	6	13	13	1
BARHL1	0.745236	19.178	2.82348e-82	1.00372e-80	1.28829	TRUE	0.342245	8.50654	8.96031e-18	2.97007e-16	0.123889	3.07558	0.00105046	0.0217438	12	427	180	31	64	5	5	5	5	12	12
ABCG5	0.884209	18.9904	1.02335e-80	3.62476e-79	1.1539	TRUE	0.569324	11.2438	1.242e-29	5.55166e-28	0.492927	9.73768	1.04129e-22	6.5702e-21	5	754	138	54	54	3	13	13	2	5	5	5
TFAP2A	0.708879	18.9685	1.5521e-80	5.48772e-79	1.62303	TRUE	0.0542148	1.55105	0.0604448	0.497983	0.232881	6.66895	1.28817e-11	5.33287e-10	8	211	188	23	47	0	3	8	8	8	8
CAR3	0.891026	18.9435	2.49824e-80	8.81709e-79	1.38433	TRUE	0.668796	13.1797	5.74441e-40	3.05481e-38	0.163353	3.22168	0.000637211	0.0135325	2	177	295	49	22	45	10	21	1	2	2	3
TEX15	0.7613	18.8865	7.35844e-80	2.59236e-78	1.60518	TRUE	0.41628	9.8128	4.95866e-23	1.86049e-21	0.447852	10.5693	2.06738e-26	1.41847e-24	5	792	91	54	54	3	13	13	2	5	5		1
FHOD3	0.709092	18.8514	1.43157e-79	5.03435e-78	1.99746	TRUE	0.550342	13.6982	5.20201e-43	2.89176e-41	0.116421	2.89248	0.00191105	0.037956	0	308	7	36	5	1	17	17	17	0	0	10
SGTB	0.86356	18.7576	8.39223e-79	2.94599e-77	1.52332	TRUE	0.703591	14.1875	5.47482e-46	3.1413e-44	0.0364351	0.735744	0.230943	0.50035	2	299	46	18	22	45	10	21	1	2	2	3
BICC1	0.857935	18.7448	1.06654e-78	3.73727e-77	1.64527	TRUE	0.450451	8.99065	1.2289e-19	4.28326e-18	0.375191	7.53031	2.53107e-14	1.1659e-12	1	550	26	78	13	18	18	3	3	16	1
ZIC2	0.811028	18.7302	1.40514e-78	4.90622e-77	2.38509	TRUE	0.0852042	1.93122	0.0267278	0.264089	0.501342	11.3792	2.65503e-30	2.00384e-28	8	739	59	45	37	37	3	8	8	8	8		2
ANO1	0.782298	18.6486	6.47778e-78	2.25779e-76	1.36597	TRUE	0.553574	12.5918	1.17092e-36	5.89151e-35	0.0669781	1.52213	0.0639888	0.50035	13	274	81	25	9	2	27	27	6	13	13	9
GPD2	0.886471	18.6286	9.4217e-78	3.27805e-76	1.96875	TRUE	0.811548	15.8721	4.94305e-57	3.15953e-55	0.0431233	0.844203	0.199278	0.50035	14	752	61	116	25	12	12	0	14	14	14	7
PEG10	0.78648	18.5839	2.16769e-77	7.52861e-76	2.22671	TRUE	0.0691701	1.53456	0.0624463	0.497983	0.601968	13.3811	3.90158e-41	3.52815e-39	1	314	145	83	11	30	30	1	10	10	1		4
CTHRC1	0.838086	18.5677	2.93487e-77	1.01751e-75	2.23844	TRUE	0.14565	2.90338	0.00184578	0.0244728	0.592784	11.8542	1.02312e-32	8.09544e-31	1	532	131	12	45	24	24	1	10	10	1		0
UNC5C	0.786271	18.5365	5.24607e-77	1.81558e-75	1.41146	TRUE	0.294685	6.925	2.17994e-12	6.0505e-11	0.19969	4.68071	1.42945e-06	4.30215e-05	8	764	270	98	51	0	3	8	8	8	8
OLIG2	0.744217	18.5273	6.22075e-77	2.14912e-75	1.22136	TRUE	0.321254	7.90091	1.38436e-15	4.25122e-14	0.0840158	2.06132	0.0196362	0.279624	4	156	236	108	26	7	0	4	19	1	4
KITL	0.784404	18.5098	8.61276e-77	2.96505e-75	1.65707	TRUE	0.186034	4.10308	2.0384e-05	0.000353041	0.0973652	2.15411	0.0156159	0.23269	2	452	170	81	40	40	8	18	18	2	2
FAM84B	0.759127	18.4659	1.94394e-76	6.68055e-75	1.67971	TRUE	0.490408	11.0474	1.12881e-28	4.88977e-27	0.159203	3.58805	0.000166579	0.00392883	0	632	7	36	5	1	17	17	17	0	0	10
6330403K07RIK	0.856425	18.3701	1.13918e-75	3.90806e-74	2.33355	TRUE	0.305698	6.05372	7.07692e-10	1.74241e-08	0.282783	5.60703	1.02914e-08	3.58064e-07	4	489	72	37	4	21	21	12	12	1	4
GADD45A	0.764573	18.3671	1.20456e-75	4.12516e-74	2.46793	TRUE	0.247975	6.10801	5.04419e-10	1.25612e-08	0.0534983	1.32061	0.0933164	0.50035	8	265	149	23	47	0	3	8	8	8	8
GPX3	0.857599	18.3494	1.66862e-75	5.70443e-74	1.85798	TRUE	0.0878235	1.71063	0.043575	0.394042	0.579841	11.3623	3.22305e-30	2.42321e-28	1	796	28	117	11	30	30	1	10	10	1		0
GM45009	0.837504	18.2462	1.10984e-74	3.78098e-73	1.53586	TRUE	0.631988	13.0297	4.14748e-39	2.18193e-37	0.154373	3.18279	0.000729328	0.0153723	4	346	292	108	26	7	0	4	19	1	4	2
PRICKLE1	0.849497	18.2049	2.35884e-74	8.02211e-73	1.09614	TRUE	0.386055	7.77293	3.8346e-15	1.17024e-13	0.206478	4.17179	1.51111e-05	0.000406199	14	635	99	118	52	6	28	0	14	14	14
SEMA3C	0.871149	18.2033	2.42744e-74	8.24112e-73	1.54509	TRUE	0.450179	8.58459	4.55808e-18	1.52374e-16	0.461569	8.8255	5.4485e-19	3.01172e-17	1	338	100	68	68	18	18	3	3	16	1
PIM2	0.807349	18.1645	4.93444e-74	1.67234e-72	1.53256	TRUE	0.742658	15.5442	8.70506e-55	5.40568e-53	0.0316027	0.661889	0.254021	0.50035	14	385	61	116	25	12	12	0	14	14	14	7
FAT4	0.807477	18.1139	1.23714e-73	4.18559e-72	1.16955	TRUE	0.304035	6.30042	1.48418e-10	3.79713e-09	0.402239	8.33326	3.93219e-17	1.99383e-15	0	351	119	10	5	1	17	17	17	0	0
MMP14	0.873257	18.1097	1.33507e-73	4.50913e-72	1.5627	TRUE	0.0839302	1.59114	0.0557888	0.482266	0.530319	10.0865	3.16819e-24	2.07924e-22	1	305	28	117	11	30	30	1	10	10	1		6
TENM4	0.700922	17.9819	1.35137e-72	4.54076e-71	2.77855	TRUE	0.351489	8.37547	2.75014e-17	8.96446e-16	0.351214	8.37006	2.87933e-17	1.46756e-15	5	286	25	17	20	42	13	13	2	5	5
HSPB8	0.830419	17.8152	2.69133e-71	9.01228e-70	1.20591	TRUE	0.485579	10.0581	4.22962e-24	1.65334e-22	0.533031	11.0643	9.3471e-29	6.79326e-27	5	395	91	54	54	3	13	13	2	5	5	5	1
FNDC3B	0.784302	17.8129	2.80575e-71	9.37942e-70	1.83023	TRUE	0.0341137	0.707283	0.239695	0.497983	0.688648	14.3632	4.40387e-47	4.21547e-45	1	757	63	62	11	30	30	1	10	10	1		6
LRTM1	0.79682	17.7758	5.43799e-71	1.81479e-69	1.16945	TRUE	0.537705	11.0969	6.49057e-29	2.83032e-27	0.337133	6.95346	1.78214e-12	7.60236e-11	12	175	206	31	64	5	5	5	5	12	12	5
MXRA7	0.896221	17.6905	2.47973e-70	8.24742e-69	2.10576	TRUE	0.57739	10.4217	9.87354e-26	4.01968e-24	0.176379	3.18246	0.000730152	0.0153731	10	275	74	2	28	11	11	24	4	4	10	4
RNF165	0.833617	17.5936	1.37851e-69	4.56934e-68	2.49016	TRUE	0.459582	9.03776	7.99601e-20	2.80189e-18	0.400883	7.88192	1.61192e-15	7.65876e-14	0	280	280	82	10	43	7	15	15	15	0
SHROOM3	0.856711	17.5841	1.63152e-69	5.39889e-68	1.92083	TRUE	0.758073	14.5475	3.02994e-48	1.78013e-46	0.145925	2.80123	0.00254538	0.0488249	13	472	76	73	6	28	6	6	6	13	13	1
GLI3	0.739624	17.5443	3.28943e-69	1.08485e-67	2.67678	TRUE	0.186542	4.19864	1.34263e-05	0.000236928	0.493119	11.119	5.07141e-29	3.71329e-27	8	663	165	45	37	37	3	8	8	8	8		2
PAPPA	0.795851	17.4545	1.58974e-68	5.23412e-67	1.49141	TRUE	0.646253	13.3825	3.82812e-41	2.06371e-39	0.0535175	1.10845	0.133834	0.50035	13	318	239	56	6	28	6	6	6	13	13	1
ZFP423	0.721923	17.4209	2.861e-68	9.38819e-67	2.04037	TRUE	0.489265	11.1	6.2744e-29	2.74215e-27	0.195387	4.43267	4.65362e-06	0.00013273	13	332	144	109	6	28	6	6	6	13	13	1
NTNG1	0.840207	17.3782	6.0328e-68	1.97632e-66	1.26007	TRUE	0.103994	2.05718	0.0198345	0.205172	0.694145	13.7723	1.87123e-43	1.71585e-41	1	383	145	83	11	30	30	1	10	10	1		5
NID1	0.860119	17.3639	7.74524e-68	2.53308e-66	1.00263	TRUE	0.308579	5.6013	1.06375e-08	2.43286e-07	0.0874754	1.5883	0.0561089	0.50035	10	410	141	14	3	11	11	24	4	4	10
TUBB2A	0.815632	17.3521	9.50265e-68	3.10267e-66	1.70045	TRUE	0.670388	13.324	8.3947e-41	4.48853e-39	0.165616	3.2912	0.000498806	0.0107561	2	283	185	119	30	9	10	21	1	2	2	9
TNNT1	0.909667	17.3489	1.0051e-67	3.27627e-66	1.47909	TRUE	0.87351	15.5692	5.8971e-55	3.67361e-53	0.0421335	0.751399	0.226206	0.50035	14	736	173	35	25	12	12	0	14	14	14	0
PLP1	0.856837	17.3194	1.67868e-67	5.46282e-66	2.1867	TRUE	0.649551	12.3614	2.11292e-35	1.02628e-33	0.0746213	1.42141	0.077599	0.50035	13	273	36	109	6	28	6	6	6	13	13	1
VCAN	0.694008	17.3083	2.03714e-67	6.61835e-66	2.55823	TRUE	0.263016	6.10425	5.16424e-10	1.28276e-08	0.311631	7.24965	2.08928e-13	9.40321e-12	1	606	261	11	13	18	18	3	3	16	1
GALNT10	0.830753	17.2438	6.23277e-67	2.01824e-65	1.51408	TRUE	0.636072	12.1856	1.85368e-34	8.76499e-33	0.210594	4.03268	2.75722e-05	0.000716829	2	330	14	99	21	13	8	18	18	2	2	3
TUBB6	0.838744	17.0144	3.20992e-65	1.03259e-63	1.66475	TRUE	0.692209	13.0233	4.51156e-39	2.36712e-37	0.0832899	1.56712	0.0585431	0.50035	14	784	173	35	25	12	12	0	14	14	14	2
3632451O06RIK	0.848507	17.0049	3.77443e-65	1.2122e-63	2.01993	TRUE	0.57505	10.8133	1.48891e-27	6.24292e-26	0.234586	4.41975	4.94086e-06	0.000140514	12	149	238	1	14	5	5	5	5	12	12	8
TTC28	0.775368	16.9333	1.27823e-64	4.09848e-63	1.95019	TRUE	0.187782	3.75747	8.58188e-05	0.00138375	0.624961	12.5621	1.70626e-36	1.437e-34	1	620	204	11	13	18	18	3	3	16	1		0
POU3F1	0.807784	16.8997	2.26067e-64	7.23671e-63	3.12582	TRUE	0.266796	5.47677	2.16586e-08	4.81321e-07	0.273803	5.62656	9.1917e-09	3.21513e-07	9	152	152	96	43	14	14	14	9	9	9
MYB	0.777314	16.8189	8.86881e-64	2.8298e-62	1.38295	TRUE	0.648178	13.0055	5.69264e-39	2.97884e-37	0.0599566	1.20496	0.11411	0.50035	14	384	151	35	25	12	12	0	14	14	14	7
RNF152	0.764546	16.8174	9.0984e-64	2.89834e-62	1.68527	TRUE	0.539921	11.1195	5.04167e-29	2.20832e-27	0.27159	5.59511	1.10244e-08	3.82887e-07	12	402	117	80	14	5	5	5	5	12	12	8
SDK2	0.851985	16.6783	9.41993e-63	2.9959e-61	1.40913	TRUE	0.620499	11.3468	3.84586e-30	1.72694e-28	0.0343171	0.626474	0.265502	0.50035	10	439	133	2	28	11	11	24	4	4	10	4
TRPS1	0.825517	16.619	2.53787e-62	8.04534e-61	1.53054	TRUE	0.548823	10.1319	1.99466e-24	7.84395e-23	0.332866	6.15085	3.85341e-10	1.47686e-08	5	795	70	32	65	3	13	13	2	5	5	5
EFNB3	0.807953	16.6186	2.55478e-62	8.08588e-61	2.03625	TRUE	0.640697	12.3131	3.85082e-35	1.85663e-33	0.0922547	1.77592	0.0378731	0.46859	2	212	225	18	22	45	10	21	1	2	2	9
TOX3	0.896036	16.6151	2.7083e-62	8.55796e-61	2.6965	TRUE	0.698901	12.3475	2.5114e-35	1.21382e-33	0.103706	1.83291	0.0334081	0.427778	4	315	178	57	57	7	0	4	19	1	4	0
LRRTM3	0.82819	16.5983	3.5821e-62	1.13009e-60	1.67649	TRUE	0.554425	10.3532	2.02421e-25	8.15626e-24	0.0867169	1.62263	0.0523341	0.50035	14	105	23	48	23	12	12	0	14	14	14	0
THSD4	0.84427	16.5734	5.43007e-62	1.71034e-60	1.15381	TRUE	0.770348	14.2006	4.54046e-46	2.61283e-44	0.119999	2.20614	0.0136872	0.209504	0	296	260	36	5	1	17	17	17	0	0	6
GLRX	0.846897	16.4925	2.07581e-61	6.51739e-60	2.29693	TRUE	0.536476	9.69276	1.61831e-22	6.04877e-21	0.309792	5.58747	1.15198e-08	3.99386e-07	12	279	206	31	64	5	5	5	5	12	12
CHST15	0.762634	16.4848	2.35826e-61	7.39234e-60	1.26116	TRUE	0.619501	13.0788	2.17694e-39	1.15143e-37	0.103696	2.19995	0.0139054	0.212017	14	378	89	74	23	12	12	0	14	14	14	0
DGKK	0.826435	16.4543	3.90632e-61	1.22255e-59	1.38758	TRUE	0.259188	4.73928	1.07242e-06	2.09186e-05	0.335677	6.1549	3.75632e-10	1.44247e-08	1	287	48	3	32	30	30	1	10	10	1
PROKR1	0.820508	16.4526	4.01917e-61	1.25586e-59	1.25062	TRUE	0.509228	9.36967	3.63789e-21	1.31709e-19	0.389559	7.16894	3.77893e-13	1.68532e-11	5	294	138	54	54	3	13	13	2	5	5
JAK2	0.849699	16.4147	7.50779e-61	2.34222e-59	1.37578	TRUE	0.634256	11.1811	2.52212e-29	1.11719e-27	0.0389363	0.685939	0.246376	0.50035	10	392	74	2	28	11	11	24	4	4	10	4
NAV1	0.65501	16.3003	4.90903e-60	1.52662e-58	2.59125	TRUE	0.236535	5.55556	1.38358e-08	3.13872e-07	0.26046	6.12523	4.52755e-10	1.72848e-08	2	214	214	34	70	13	8	18	18	2	2
CDH11	0.78125	16.2971	5.17513e-60	1.60683e-58	2.05576	TRUE	0.467807	9.19999	1.78997e-20	6.36314e-19	0.106386	2.09303	0.0181732	0.264027	14	609	4	41	8	6	28	0	14	14	14
TSPAN18	0.86253	16.2837	6.44693e-60	1.99855e-58	1.63434	TRUE	0.622202	10.8845	6.83469e-28	2.91559e-26	0.331302	5.79841	3.34732e-09	1.20966e-07	5	586	70	32	65	3	13	13	2	5	5	5
MXD4	0.772614	16.1816	3.39834e-59	1.05017e-57	2.03107	TRUE	0.123558	2.36731	0.00895895	0.10221	0.508148	9.78468	6.55046e-23	4.14644e-21	1	327	104	62	11	30	30	1	10	10	1
GAS1	0.778894	16.1556	5.18397e-59	1.59945e-57	2.76693	TRUE	0.10047	2.00911	0.0222627	0.226235	0.626834	12.5478	2.04393e-36	1.70673e-34	8	326	59	45	37	37	3	8	8	8	8		2
ITGB8	0.809487	16.1401	6.66755e-59	2.05396e-57	1.68235	TRUE	0.555057	10.2646	5.08888e-25	2.03379e-23	0.0890721	1.64446	0.0500404	0.50035	0	131	67	10	5	1	17	17	17	0	0	10
SLC31A2	0.878738	16.1336	7.40955e-59	2.27896e-57	1.28746	TRUE	0.30697	5.13065	1.4437e-07	3.06599e-06	0.558611	9.37514	3.45422e-21	2.0856e-19	1	345	26	78	13	18	18	3	3	16	1
FNDC3C1	0.798555	16.1172	9.65935e-59	2.96628e-57	2.53332	TRUE	0.404704	7.59627	1.52389e-14	4.55844e-13	0.306226	5.75672	4.28814e-09	1.53552e-07	13	726	76	73	6	28	6	6	6	13	13
ZFHX3	0.793084	16.0963	1.35329e-58	4.14933e-57	2.2943	TRUE	0.577998	10.9119	5.05798e-28	2.16709e-26	0.352954	6.65979	1.37105e-11	5.66404e-10	5	204	221	17	20	42	13	13	2	5	5	5
CERCAM	0.881715	16.0066	5.74499e-58	1.75872e-56	1.28255	TRUE	0.76405	12.8635	3.61234e-38	1.87032e-36	0.0660951	1.11347	0.132752	0.50035	2	331	195	119	30	9	10	21	1	2	2	1
DLC1	0.841509	16.0012	6.27019e-58	1.91651e-56	1.41083	TRUE	0.531123	9.30548	6.6697e-21	2.40146e-19	0.160849	2.82497	0.00236429	0.0459806	4	127	38	58	26	7	0	4	19	1	4
FHDC1	0.847991	15.9812	8.64022e-58	2.63681e-56	1.1621	TRUE	0.641766	11.3592	3.33723e-30	1.50198e-28	0.143245	2.5318	0.00567394	0.0990568	0	258	93	36	5	1	17	17	17	0	0	10
PPP1R16B	0.814969	15.9437	1.57572e-57	4.79387e-56	1.42708	TRUE	0.486151	8.71433	1.46239e-18	4.9562e-17	0.397483	7.14569	4.47713e-13	1.98318e-11	1	302	94	11	13	18	18	3	3	16	1
GM2694	0.773533	15.9375	1.74026e-57	5.28625e-56	2.80899	TRUE	0.249025	4.76376	9.50104e-07	1.86253e-05	0.434579	8.31796	4.47452e-17	2.25716e-15	13	342	166	115	41	41	6	6	6	13	13
GJA1	0.754248	15.9036	2.99255e-57	9.07616e-56	3.34926	TRUE	0.433864	8.54314	6.53114e-18	2.17221e-16	0.303396	5.98644	1.07245e-09	4.02383e-08	14	202	202	41	8	6	28	0	14	14	14
ZFP710	0.725658	15.8608	5.92091e-57	1.79299e-55	2.08846	TRUE	0.600954	12.277	6.02017e-35	2.88131e-33	0.242903	4.95441	3.62743e-07	1.1389e-05	0	759	69	36	5	1	17	17	17	0	0	6
ADGRG1	0.867354	15.7382	4.13695e-56	1.24891e-54	1.30703	TRUE	0.73709	12.3028	4.37275e-35	2.09796e-33	0.172049	2.87058	0.00204862	0.0404427	2	396	256	119	30	9	10	21	1	2	2	3
CACNA1G	0.794216	15.7326	4.519e-56	1.36215e-54	1.50178	TRUE	0.597696	10.9526	3.22777e-28	1.39512e-26	0.197944	3.62795	0.000142838	0.00340159	2	253	35	107	30	9	10	21	1	2	2	1
KLHL13	0.832338	15.7297	4.73268e-56	1.42438e-54	1.80728	TRUE	0.776966	13.7341	3.17062e-43	1.77257e-41	0.0232367	0.411219	0.340456	0.50035	14	403	61	116	25	12	12	0	14	14	14	7
PHOX2A	0.898014	15.7005	7.50234e-56	2.25449e-54	1.3518	TRUE	0.801087	13.0369	3.77086e-39	1.98913e-37	0.0369555	0.601979	0.273594	0.50035	2	506	135	18	22	45	10	21	1	2	2	9
TMEM163	0.873238	15.6778	1.07249e-55	3.21797e-54	1.28249	TRUE	0.467292	7.76903	3.95433e-15	1.20303e-13	0.427125	7.08818	6.7943e-13	2.98265e-11	0	597	19	24	49	1	17	17	17	0	0
PKNOX2	0.693556	15.636	2.07041e-55	6.19325e-54	1.80381	TRUE	0.493143	10.3425	2.26257e-25	9.07605e-24	0.0460245	0.966343	0.166936	0.50035	2	720	225	18	22	45	10	21	1	2	2	3
C130073E24RIK	0.835521	15.6099	3.11451e-55	9.3023e-54	1.08784	TRUE	0.580427	10.0823	3.30697e-24	1.29526e-22	0.184054	3.20568	0.000673708	0.0142613	2	367	295	49	22	45	10	21	1	2	2	3
PCSK2	0.861165	15.6083	3.19739e-55	9.53532e-54	1.23648	TRUE	0.734414	12.5816	1.3335e-36	6.69238e-35	0.0736249	1.26236	0.10341	0.50035	14	750	89	74	23	12	12	0	14	14	14	0
RASSF2	0.7831	15.4829	2.26195e-54	6.72518e-53	1.50828	TRUE	0.676596	12.4605	6.12774e-36	3.02883e-34	0.0521671	0.961682	0.168105	0.50035	13	448	239	56	6	28	6	6	6	13	13	1
RGS16	0.683661	15.4701	2.76051e-54	8.19508e-53	1.05823	TRUE	0.14616	3.64877	0.00013175	0.00206332	0.0743914	1.89777	0.0288629	0.381142	12	200	95	63	63	31	31	5	5	12	12
BASP1	0.781777	15.462	3.12932e-54	9.27594e-53	3.49799	TRUE	0.43486	7.99558	6.44802e-16	2.0116e-14	0.154941	2.84824	0.0021981	0.0430171	12	469	234	1	14	5	5	5	5	12	12
LMAN1	0.929524	15.4487	3.84912e-54	1.13924e-52	2.83917	TRUE	0.744706	11.5459	3.87131e-31	1.77908e-29	0.12495	1.93813	0.0263035	0.354015	6	289	31	75	1	20	20	20	20	6	6	2
TNFRSF21	0.830384	15.4116	6.83691e-54	2.02049e-52	1.6685	TRUE	0.51649	8.83577	4.9707e-19	1.71424e-17	0.307471	5.24473	7.82567e-08	2.57225e-06	0	309	47	24	49	1	17	17	17	0	0
IKZF2	0.740449	15.4112	6.87857e-54	2.02975e-52	2.12576	TRUE	0.204384	3.95353	3.85032e-05	0.000647983	0.253796	4.92821	4.14939e-07	1.29449e-05	1	216	48	3	32	30	30	1	10	10	1
SPEG	0.876053	15.3989	8.31962e-54	2.45129e-52	1.57732	TRUE	0.679973	11.1229	4.85436e-29	2.13103e-27	0.233985	3.83119	6.37636e-05	0.00159393	4	374	86	57	57	7	0	4	19	1	4	0
TGFB1I1	0.74183	15.3961	8.68988e-54	2.55654e-52	1.53819	TRUE	0.478797	9.22498	1.41801e-20	5.05921e-19	0.0924522	1.78396	0.0372151	0.463665	14	213	23	48	23	12	12	0	14	14	14
FAM53B	0.851317	15.3193	2.84282e-53	8.35099e-52	1.76211	TRUE	0.712511	11.9305	4.10316e-33	1.91706e-31	0.0540356	0.904304	0.182917	0.50035	14	323	169	43	52	6	28	0	14	14	14	2
SASH1	0.756269	15.2897	4.47984e-53	1.31402e-51	1.84207	TRUE	0.512753	9.64853	2.49321e-22	9.28354e-21	0.27264	5.13082	1.44244e-07	4.68626e-06	5	292	122	32	65	3	13	13	2	5	5
IRS2	0.777091	15.2664	6.40013e-53	1.87447e-51	1.97056	TRUE	0.222795	4.04135	2.65717e-05	0.000452619	0.496535	9.03337	8.32306e-20	4.8178e-18	1	219	204	11	13	18	18	3	3	16	1
CACNB3	0.870233	15.2516	8.03315e-53	2.34925e-51	1.4823	TRUE	0.686968	11.1448	3.79585e-29	1.67009e-27	0.402312	6.51651	3.59804e-11	1.45277e-09	5	398	298	32	65	3	13	13	2	5	5	3
VASN	0.855128	15.2296	1.12423e-52	3.28287e-51	1.16338	TRUE	0.295491	4.8528	6.08655e-07	1.21009e-05	0.358294	5.88833	1.95063e-09	7.22212e-08	1	358	28	117	11	30	30	1	10	10	1
LMO2	0.846942	15.2114	1.48648e-52	4.33421e-51	1.2714	TRUE	0.586791	9.85003	3.42618e-23	1.29541e-21	0.14677	2.46036	0.00693979	0.117295	14	688	53	74	23	12	12	0	14	14	14
SFRP2	0.842855	15.1924	1.9844e-52	5.77742e-51	2.76384	TRUE	0.482385	8.17266	1.50838e-16	4.79723e-15	0.428417	7.26776	1.82745e-13	8.2437e-12	13	210	134	19	41	41	6	6	6	13	13
FRZB	0.836614	15.1679	2.88606e-52	8.37768e-51	1.61366	TRUE	0.516324	8.80974	6.27181e-19	2.14411e-17	0.200055	3.4162	0.000317512	0.00716978	4	591	9	16	4	21	21	12	12	1	4
COL11A1	0.844214	15.1574	3.38485e-52	9.81106e-51	1.47068	TRUE	0.463605	7.71739	5.9366e-15	1.7951e-13	0.0334701	0.555363	0.289323	0.50035	10	343	172	38	3	11	11	24	4	4	10
MPPED1	0.886014	15.1215	5.83971e-52	1.69016e-50	1.36333	TRUE	0.695287	11.0628	9.50411e-29	4.13524e-27	0.0567836	0.904177	0.182951	0.50035	14	329	137	118	52	6	28	0	14	14	14	2
GREB1L	0.643295	15.091	9.27702e-52	2.68105e-50	2.46928	TRUE	0.448672	9.81408	4.89626e-23	1.8406e-21	0.191555	4.18078	1.45258e-05	0.000391537	0	254	87	110	10	43	7	15	15	15	0
ARHGEF26	0.827337	15.0669	1.33658e-51	3.85702e-50	1.58956	TRUE	0.499727	8.45664	1.37594e-17	4.54548e-16	0.363139	6.14781	3.92812e-10	1.50256e-08	1	381	26	78	13	18	18	3	3	16	1
PLAC8	0.859853	15.0548	1.60482e-51	4.62429e-50	1.31546	TRUE	0.387772	6.15214	3.82228e-10	9.57913e-09	0.047863	0.760343	0.223525	0.50035	10	570	141	14	3	11	11	24	4	4	10
CHCHD10	0.877835	15.0473	1.79673e-51	5.1697e-50	1.29999	TRUE	0.729979	11.6694	9.13399e-32	4.23727e-30	0.0804	1.28628	0.0991731	0.50035	14	87	288	118	52	6	28	0	14	14	14	0
HIVEP2	0.866663	15.0249	2.52203e-51	7.22477e-50	1.13193	TRUE	0.607175	9.82081	4.58002e-23	1.72502e-21	0.216765	3.49987	0.000232743	0.00535824	0	334	27	10	5	1	17	17	17	0	0
WDR6	0.906189	14.9766	5.2244e-51	1.49226e-49	2.25417	TRUE	0.639571	9.91793	1.73953e-23	6.69311e-22	0.290775	4.51052	3.23337e-06	9.39977e-05	4	477	178	57	57	7	0	4	19	1	4
CTNNBIP1	0.827134	14.972	5.59323e-51	1.59529e-49	2.92411	TRUE	0.642709	10.8411	1.09854e-27	4.63585e-26	0.0821327	1.38454	0.083096	0.50035	6	142	77	76	1	20	20	20	20	6	6	7
MAN2A1	0.66144	14.9577	6.94186e-51	1.97707e-49	2.03496	TRUE	0.47156	9.95444	1.20592e-23	4.67663e-22	0.0672062	1.42058	0.0777196	0.50035	2	622	46	18	22	45	10	21	1	2	2
1700013H16RIK	0.86918	14.9363	9.56226e-51	2.71942e-49	1.43147	TRUE	0.708754	11.4607	1.0388e-30	4.70772e-29	0.267302	4.32107	7.76375e-06	0.000215485	12	592	73	80	14	5	5	5	5	12	12	8
WNT3	0.828552	14.9127	1.36293e-50	3.87045e-49	1.12428	TRUE	0.446394	7.71078	6.25265e-15	1.88763e-13	0.308899	5.33844	4.68749e-08	1.57235e-06	8	324	270	98	51	0	3	8	8	8	8
TCFL5	0.876566	14.8871	1.9974e-50	5.66401e-49	2.17818	TRUE	0.813294	12.8544	4.06494e-38	2.09911e-36	0.0383892	0.607871	0.271637	0.50035	14	455	61	116	25	12	12	0	14	14	14	2
TXNIP	0.776311	14.8787	2.26535e-50	6.41457e-49	1.92081	TRUE	0.145416	2.56658	0.00513541	0.0621667	0.503096	8.90721	2.61655e-19	1.47542e-17	1	169	125	51	11	30	30	1	10	10	1
GRB10	0.837592	14.8607	2.96683e-50	8.38878e-49	3.46123	TRUE	0.296127	4.86859	5.6199e-07	1.12072e-05	0.525001	8.63679	2.89061e-18	1.54137e-16	0	135	130	44	44	44	17	17	17	0	0
RSPO1	0.784275	14.8515	3.40113e-50	9.60293e-49	1.44368	TRUE	0.382864	6.894	2.7123e-12	7.4752e-11	0.519567	9.37721	3.3872e-21	2.05145e-19	5	442	91	54	54	3	13	13	2	5	5
CFAP77	0.807935	14.8066	6.64047e-50	1.87221e-48	1.31825	TRUE	0.31623	5.5199	1.69592e-08	3.81202e-07	0.144722	2.52278	0.00582158	0.101184	12	269	180	31	64	5	5	5	5	12	12
ANGPT1	0.843825	14.8056	6.7425e-50	1.89825e-48	1.2319	TRUE	0.422917	6.72047	9.05672e-12	2.45131e-10	0.0528893	0.840955	0.200187	0.50035	10	658	141	14	3	11	11	24	4	4	10
NKAIN4	0.898571	14.8032	6.98283e-50	1.9631e-48	1.31301	TRUE	0.734588	11.2833	7.93727e-30	3.556e-28	0.231498	3.55446	0.000189376	0.00442397	13	328	83	56	6	28	6	6	6	13	13	1
A730017C20RIK	0.823187	14.7944	7.96083e-50	2.23165e-48	1.65569	TRUE	0.494241	8.21537	1.05753e-16	3.37429e-15	0.220557	3.66681	0.000122798	0.00295665	14	143	284	35	25	12	12	0	14	14	14
SLC9A3R1	0.829077	14.7523	1.48598e-49	4.14786e-48	2.35552	TRUE	0.615488	10.2444	6.27255e-25	2.49668e-23	0.113448	1.89075	0.0293292	0.385225	1	220	92	78	13	18	18	3	3	16	1	1
FOLR1	0.801235	14.7126	2.67703e-49	7.46184e-48	1.18526	TRUE	0.488783	8.35567	3.25301e-17	1.05511e-15	0.385056	6.59434	2.1358e-11	8.6952e-10	1	382	100	68	68	18	18	3	3	16	1
KBTBD11	0.808443	14.7015	3.1526e-49	8.77495e-48	2.01083	TRUE	0.520564	8.93294	2.0741e-19	7.20354e-18	0.106173	1.82503	0.0339983	0.434081	13	215	81	25	9	2	27	27	6	13	13
B230312C02RIK	0.694837	14.7008	3.1831e-49	8.8473e-48	2.73026	TRUE	0.40695	8.0919	2.93713e-16	9.28106e-15	0.293748	5.84329	2.55894e-09	9.33347e-08	12	488	73	80	14	5	5	5	5	12	12
CHN2	0.813148	14.6719	4.88027e-49	1.35453e-47	1.46729	TRUE	0.422607	7.17852	3.52357e-13	1.00645e-11	0.244798	4.16539	1.55407e-05	0.000416038	12	150	300	1	14	5	5	5	5	12	12
ZEB2	0.747584	14.6568	6.0982e-49	1.69018e-47	3.09587	TRUE	0.51924	9.50053	1.04417e-21	3.82986e-20	0.222933	4.07496	2.3011e-05	0.000606916	0	136	78	44	44	44	17	17	17	0	0
LAPTM4B	0.864448	14.6397	7.83623e-49	2.16883e-47	2.0489	TRUE	0.690879	10.8234	1.33346e-27	5.61512e-26	0.293335	4.59351	2.17927e-06	6.46955e-05	5	519	122	32	65	3	13	13	2	5	5	3
PRMT8	0.901887	14.6214	1.026e-48	2.83167e-47	1.27051	TRUE	0.720098	10.9156	4.85467e-28	2.08453e-26	0.359986	5.44242	2.62808e-08	8.96885e-07	0	223	27	10	5	1	17	17	17	0	0	6
KLF3	0.748989	14.4976	6.26971e-48	1.72553e-46	2.6524	TRUE	0.491218	8.81984	5.73128e-19	1.96961e-17	0.0459548	0.826743	0.204191	0.50035	2	741	219	69	69	23	23	23	1	2	2
CSRP2	0.634201	14.4747	8.75714e-48	2.40674e-46	2.85018	TRUE	0.464354	9.95726	1.17218e-23	4.55481e-22	0.131306	2.81138	0.00246646	0.0474968	14	174	51	104	25	12	12	0	14	14	14
SPRED3	0.700665	14.4601	1.08228e-47	2.9703e-46	1.61432	TRUE	0.359691	6.97354	1.54536e-12	4.3259e-11	0.116472	2.26133	0.0118694	0.185002	2	252	272	81	40	40	8	18	18	2	2
PTPRD	0.806299	14.436	1.53534e-47	4.20783e-46	1.53331	TRUE	0.298712	4.92136	4.29719e-07	8.67528e-06	0.37817	6.24416	2.13041e-10	8.26187e-09	4	397	112	58	26	7	0	4	19	1	4
FGFR3	0.839521	14.4078	2.31129e-47	6.32557e-46	1.24377	TRUE	0.58839	9.53667	7.37466e-22	2.72529e-20	0.181258	2.92947	0.00169769	0.0342031	0	230	264	10	5	1	17	17	17	0	0
ELAVL4	0.813299	14.3981	2.65858e-47	7.26592e-46	1.50035	TRUE	0.241112	4.01221	3.00759e-05	0.000509654	0.480376	8.01624	5.45156e-16	2.63488e-14	1	261	26	78	13	18	18	3	3	16	1
ERICH2	0.906344	14.3952	2.77149e-47	7.56397e-46	1.01513	TRUE	0.771923	11.384	2.51117e-30	1.1328e-28	0.160267	2.36271	0.00907087	0.147254	2	162	256	119	30	9	10	21	1	2	2	3
FAM43A	0.844465	14.382	3.35804e-47	9.15205e-46	1.15982	TRUE	0.14051	2.19274	0.0141629	0.152451	0.547458	8.58691	4.46711e-18	2.3564e-16	1	336	120	3	32	30	30	1	10	10	1
FAM174B	0.853766	14.3308	7.02167e-47	1.91104e-45	1.15125	TRUE	0.0850173	1.27364	0.101395	0.497983	0.736643	11.1216	4.92216e-29	3.61751e-27	1	361	1	112	45	24	24	1	10	10	1		0
CBLN1	0.77565	14.3077	9.79412e-47	2.66191e-45	1.68936	TRUE	0.346457	5.91666	1.64276e-09	3.94081e-08	0.290576	4.95683	3.58269e-07	1.12665e-05	13	676	166	115	41	41	6	6	6	13	13
ELMO1	0.768524	14.2872	1.31539e-46	3.57012e-45	1.65753	TRUE	0.0629668	1.08781	0.13834	0.497983	0.698705	12.0996	5.30626e-34	4.28497e-32	1	164	63	62	11	30	30	1	10	10	1		6
SEMA3F	0.793743	14.2778	1.50527e-46	4.07982e-45	1.30232	TRUE	0.412321	6.85267	3.62417e-12	9.93254e-11	0.158429	2.63013	0.00426761	0.0773969	10	239	105	38	3	11	11	24	4	4	10
HS3ST3B1	0.672758	14.2587	1.97746e-46	5.35225e-45	1.65559	TRUE	0.250527	4.92888	4.13508e-07	8.37385e-06	0.288739	5.69197	6.27921e-09	2.22012e-07	2	235	235	81	40	40	8	18	18	2	2
BMP5	0.698544	14.2527	2.15784e-46	5.8244e-45	1.42584	TRUE	0.138047	2.9488	0.00159503	0.0214526	0.328192	7.03962	9.63853e-13	4.15685e-11	8	502	188	23	47	0	3	8	8	8	8
INSM1	0.720285	14.2401	2.58429e-46	6.96586e-45	1.2627	TRUE	0.272889	5.75644	4.2953e-09	1.00461e-07	0.109164	2.34325	0.0095582	0.154244	12	368	10	63	63	31	31	5	5	12	12
TSPAN13	0.912931	14.1919	5.14198e-46	1.38221e-44	2.58222	TRUE	0.72278	10.4176	1.03026e-25	4.18569e-24	0.105816	1.52714	0.0633628	0.50035	11	144	200	27	56	17	2	11	11	11	11	9
ENPP3	0.843237	14.1893	5.33432e-46	1.43195e-44	1.20295	TRUE	0.206788	3.188	0.0007163	0.0101487	0.619987	9.60017	3.99053e-22	2.47022e-20	1	160	131	12	45	24	24	1	10	10	1
SOCS3	0.879971	14.1651	7.53396e-46	2.01966e-44	1.29873	TRUE	0.500576	7.42531	5.62572e-14	1.66255e-12	0.367055	5.45189	2.49185e-08	8.51874e-07	2	201	185	119	30	9	10	21	1	2	2
PARVB	0.883736	14.1401	1.07494e-45	2.87771e-44	1.14562	TRUE	0.717654	10.7075	4.69294e-27	1.95519e-25	0.165263	2.46979	0.00675963	0.114645	4	310	38	58	26	7	0	4	19	1	4	0
ZFP365	0.784956	14.1145	1.54512e-45	4.13077e-44	1.33018	TRUE	0.690702	11.7231	4.85029e-32	2.26074e-30	0.0592173	1.00642	0.157107	0.50035	14	194	173	35	25	12	12	0	14	14	14	0
NXPH1	0.834686	14.0596	3.36291e-45	8.97827e-44	1.0262	TRUE	0.66907	10.6626	7.61708e-27	3.14673e-25	0.0904746	1.44384	0.0743917	0.50035	4	133	292	108	26	7	0	4	19	1	4	0
SETBP1	0.637002	14.0351	4.75164e-45	1.26687e-43	1.84859	TRUE	0.376019	7.77053	3.90784e-15	1.19074e-13	0.242531	5.0087	2.73995e-07	8.68594e-06	0	337	78	44	44	44	17	17	17	0	0
MCF2	0.851741	14.0083	6.93769e-45	1.8472e-43	1.36219	TRUE	0.78257	12.1484	2.92453e-34	1.37952e-32	0.0605261	0.939801	0.17366	0.50035	4	170	140	57	57	7	0	4	19	1	4	0
ANXA11	0.884267	14.0048	7.28319e-45	1.93656e-43	1.05859	TRUE	0.541961	8.01226	5.63091e-16	1.76793e-14	0.0263001	0.387243	0.349288	0.50035	10	193	172	38	3	11	11	24	4	4	10
RAB3B	0.848344	13.9858	9.51072e-45	2.52542e-43	1.30411	TRUE	0.715357	10.6876	5.81575e-27	2.41274e-25	0.257519	3.85069	5.88932e-05	0.00148162	5	372	213	32	65	3	13	13	2	5	5	5
CX3CL1	0.84907	13.9831	9.88924e-45	2.62239e-43	1.13062	TRUE	0.557338	8.59738	4.078e-18	1.36791e-16	0.117526	1.81208	0.034987	0.443508	10	227	105	38	3	11	11	24	4	4	10
HDAC11	0.832989	13.9787	1.05089e-44	2.78294e-43	1.36556	TRUE	0.100733	1.50886	0.0656668	0.497983	0.717518	10.8273	1.27763e-27	8.95387e-26	1	317	6	112	45	24	24	1	10	10	1		0
IGFBP3	0.844498	13.9751	1.1059e-44	2.92468e-43	1.7269	TRUE	0.627845	10.022	6.10151e-24	2.3756e-22	0.175707	2.80866	0.00248741	0.0478066	14	241	89	74	23	12	12	0	14	14	14	0
MIRG	0.743234	13.9471	1.63773e-44	4.32533e-43	1.76423	TRUE	0.693628	12.2688	6.65835e-35	3.179e-33	0.0349277	0.618221	0.268215	0.50035	4	278	140	57	57	7	0	4	19	1	4	7
FOXO1	0.823026	13.9319	2.0281e-44	5.34911e-43	1.40921	TRUE	0.388924	6.14048	4.11354e-10	1.02959e-08	0.3304	5.20894	9.49597e-08	3.10049e-06	0	411	19	24	49	1	17	17	17	0	0
BEX3	0.633235	13.9284	2.1292e-44	5.60823e-43	2.34612	TRUE	0.560396	11.6272	1.4989e-31	6.92068e-30	0.110948	2.30322	0.0106333	0.169365	7	114	229	71	0	22	22	22	0	7	7	1
MPP2	0.791341	13.9241	2.26023e-44	5.94537e-43	1.56732	TRUE	0.554515	8.94468	1.86519e-19	6.48949e-18	0.225589	3.6334	0.000139853	0.0033386	5	168	213	32	65	3	13	13	2	5	5
RBP4	0.824092	13.9179	2.4667e-44	6.47114e-43	1.42583	TRUE	0.345862	5.32126	5.15247e-08	1.12216e-06	0.595542	9.1697	2.37162e-20	1.40175e-18	1	615	131	12	45	24	24	1	10	10	1
SRGAP3	0.639487	13.8925	3.51662e-44	9.20089e-43	1.78407	TRUE	0.407399	8.22137	1.00598e-16	3.21504e-15	0.180609	3.64711	0.000132601	0.00317321	2	276	35	107	30	9	10	21	1	2	2
GRTP1	0.876927	13.8738	4.56835e-44	1.19367e-42	1.73083	TRUE	0.820324	12.192	1.71353e-34	8.12189e-33	0.0717072	1.06468	0.143511	0.50035	14	209	173	35	25	12	12	0	14	14	14	0
TIPARP	0.851499	13.8727	4.63918e-44	1.21057e-42	2.03305	TRUE	0.582482	8.82567	5.44039e-19	1.87293e-17	0.198117	3.00496	0.00132808	0.0270622	14	132	169	43	52	6	28	0	14	14	14
RARB	0.877482	13.8672	5.00728e-44	1.30489e-42	1.10371	TRUE	0.384012	5.63232	8.89002e-09	2.04752e-07	0.156994	2.3012	0.0106902	0.169858	4	123	71	37	4	21	21	12	12	1	4
RDH10	0.850327	13.8205	9.5899e-44	2.49579e-42	1.86457	TRUE	0.195486	2.91412	0.00178344	0.0236943	0.619769	9.30095	6.96005e-21	4.18948e-19	1	380	179	11	13	18	18	3	3	16	1
LRIG3	0.847921	13.7705	1.91693e-43	4.96908e-42	1.85215	TRUE	0.499905	7.58365	1.67986e-14	5.01734e-13	0.251245	3.82062	6.65586e-05	0.00165957	4	233	38	58	26	7	0	4	19	1	4
GNG2	0.878662	13.7674	2.00261e-43	5.18434e-42	2.27118	TRUE	0.471718	6.80117	5.18865e-12	1.41412e-10	0.202615	2.93325	0.00167717	0.0338739	4	165	38	58	26	7	0	4	19	1	4
SIRPA	0.789972	13.7664	2.0307e-43	5.25013e-42	1.76806	TRUE	0.306225	4.91384	4.46555e-07	8.99667e-06	0.363218	5.81928	2.95505e-09	1.07185e-07	0	173	119	10	5	1	17	17	17	0	0
LPAR6	0.837679	13.7426	2.81941e-43	7.27007e-42	2.48218	TRUE	0.0522136	0.781703	0.217194	0.497983	0.575617	8.64988	2.57761e-18	1.38577e-16	1	516	120	3	32	30	30	1	10	10	1
BMPER	0.662475	13.7415	2.86343e-43	7.37388e-42	1.03569	TRUE	0.0922597	2.10017	0.0178571	0.186785	0.273261	6.25424	1.99722e-10	7.76067e-09	8	109	188	23	47	0	3	8	8	8	8
FAM171B	0.83326	13.738	3.00632e-43	7.73172e-42	1.86803	TRUE	0.267912	4.10618	2.01124e-05	0.000348644	0.555248	8.55669	5.80758e-18	3.04712e-16	4	244	112	58	26	7	0	4	19	1	4
SFRP1	0.881791	13.6958	5.37983e-43	1.38178e-41	3.6473	TRUE	0.538785	7.95107	9.24569e-16	2.85265e-14	0.362554	5.34571	4.50309e-08	1.51568e-06	0	240	240	85	10	43	7	15	15	15	0
TMEM47	0.783831	13.681	6.59269e-43	1.69109e-41	3.24088	TRUE	0.193637	3.16195	0.000783592	0.0110542	0.46805	7.66248	9.11903e-15	4.24035e-13	4	444	75	55	55	8	0	4	19	1	4
DTNA	0.84361	13.6566	9.22149e-43	2.36231e-41	1.44371	TRUE	0.0531331	0.779837	0.217743	0.497983	0.649579	9.60459	3.82321e-22	2.38167e-20	1	298	120	3	32	30	30	1	10	10	1
TMEM38B	0.884528	13.651	9.9497e-43	2.54554e-41	1.76137	TRUE	0.705925	10.1433	1.77512e-24	6.99462e-23	0.269268	3.86841	5.47726e-05	0.0013815	12	86	117	80	14	5	5	5	5	12	12	8
E130012A19RIK	0.794502	13.6499	1.01058e-42	2.58212e-41	2.53763	TRUE	0.375138	6.01765	8.84837e-10	2.16229e-08	0.34148	5.48668	2.0478e-08	7.04982e-07	13	391	134	19	41	41	6	6	6	13	13
TSHZ2	0.867211	13.5894	2.3147e-42	5.90655e-41	1.55117	TRUE	0.226027	3.22951	0.000620018	0.00888722	0.382215	5.48215	2.10099e-08	7.22027e-07	1	163	28	117	11	30	30	1	10	10	1
CDH7	0.808632	13.5846	2.47237e-42	6.3007e-41	1.16166	TRUE	0.456151	7.07667	7.38302e-13	2.0936e-11	0.122281	1.89159	0.0292729	0.384744	10	166	17	14	3	11	11	24	4	4	10
MYL9	0.887088	13.5837	2.50129e-42	6.36611e-41	1.41849	TRUE	0.626514	8.86482	3.83146e-19	1.32368e-17	0.110697	1.56367	0.0589477	0.50035	10	161	133	2	28	11	11	24	4	4	10
ADGRL3	0.775113	13.5667	3.15316e-42	8.01481e-41	1.87497	TRUE	0.591853	9.66556	2.11159e-22	7.87753e-21	0.231245	3.7686	8.20825e-05	0.00203115	0	375	87	110	10	43	7	15	15	15	0
DAAM1	0.73886	13.5656	3.20054e-42	8.12475e-41	2.07576	TRUE	0.350235	6.04374	7.52928e-10	1.84668e-08	0.338214	5.84363	2.55371e-09	9.33175e-08	1	475	39	68	68	18	18	3	3	16	1
WFIKKN1	0.746412	13.5362	4.778e-42	1.21135e-40	1.29345	TRUE	0.295963	5.08364	1.85135e-07	3.90216e-06	0.586733	10.1011	2.73027e-24	1.79785e-22	5	182	91	54	54	3	13	13	2	5	5		1
SLC1A3	0.821794	13.508	7.0132e-42	1.77574e-40	1.49206	TRUE	0.716493	11.1509	3.54588e-29	1.56361e-27	0.153912	2.39783	0.00824634	0.135412	13	103	83	56	6	28	6	6	6	13	13	1
RGS2	0.770571	13.4879	9.21757e-42	2.33088e-40	1.91808	TRUE	0.653054	10.8589	9.0441e-28	3.82711e-26	0.0846936	1.40913	0.0793977	0.50035	13	140	148	56	6	28	6	6	6	13	13	1
SLC2A1	0.867628	13.4424	1.70625e-41	4.30357e-40	4.20784	TRUE	0.764897	11.2424	1.26227e-29	5.62944e-28	0.093824	1.37512	0.0845475	0.50035	3	250	20	33	16	16	4	10	21	3	3	8
MTCL1	0.612385	13.4245	2.17146e-41	5.4699e-40	2.27105	TRUE	0.265228	5.45082	2.50694e-08	5.53984e-07	0.322805	6.6348	1.62474e-11	6.656e-10	5	137	25	17	20	42	13	13	2	5	5
UNC5B	0.806373	13.3947	3.24566e-41	8.15487e-40	1.21186	TRUE	0.598301	9.30182	6.90337e-21	2.48104e-19	0.141507	2.20205	0.013831	0.211211	14	297	53	74	23	12	12	0	14	14	14
WWC1	0.652547	13.3592	5.23206e-41	1.3129e-39	2.14045	TRUE	0.411586	7.86032	1.91578e-15	5.85565e-14	0.06121	1.1696	0.121081	0.50035	2	82	46	18	22	45	10	21	1	2	2
PCDH17	0.74446	13.3445	6.37771e-41	1.59834e-39	1.83608	TRUE	0.33031	5.51346	1.75928e-08	3.94541e-07	0.218423	3.65296	0.000129617	0.00310937	13	319	15	19	41	41	6	6	6	13	13
CPE	0.879614	13.3394	6.8239e-41	1.70798e-39	2.2165	TRUE	0.783498	11.1904	2.27165e-29	1.00852e-27	0.187624	2.67824	0.0037005	0.0681191	12	100	238	1	14	5	5	5	5	12	12	8
LGI2	0.846582	13.3017	1.13162e-40	2.82877e-39	1.43182	TRUE	0.742678	10.8642	8.5376e-28	3.62626e-26	0.0858012	1.2563	0.104503	0.50035	14	111	151	35	25	12	12	0	14	14	14	7
TMEM37	0.794402	13.2902	1.31987e-40	3.29514e-39	1.36761	TRUE	0.322136	5.121	1.51961e-07	3.22371e-06	0.0316868	0.504349	0.307008	0.50035	14	205	171	43	52	6	28	0	14	14	14
CRIM1	0.821942	13.2879	1.35998e-40	3.39097e-39	1.37272	TRUE	0.0912413	1.33597	0.0907788	0.497983	0.750705	11.0529	1.06097e-28	7.65419e-27	1	774	6	112	45	24	24	1	10	10	1		0
TNRC18	0.661791	13.2853	1.40787e-40	3.50592e-39	2.20345	TRUE	0.452913	8.54456	6.45157e-18	2.14939e-16	0.0585304	1.10559	0.134452	0.50035	2	197	225	18	22	45	10	21	1	2	2
JAM2	0.879265	13.2704	1.7182e-40	4.27329e-39	1.41255	TRUE	0.638119	9.07977	5.44037e-20	1.91663e-18	0.283125	4.03705	2.70635e-05	0.00070527	2	251	35	107	30	9	10	21	1	2	2
CACHD1	0.72339	13.2696	1.7375e-40	4.31581e-39	2.22321	TRUE	0.410944	7.01994	1.10982e-12	3.12452e-11	0.300067	5.12772	1.46634e-07	4.75602e-06	5	117	70	32	65	3	13	13	2	5	5
NET1	0.765977	13.2679	1.77606e-40	4.40601e-39	2.779	TRUE	0.306452	5.00749	2.75716e-07	5.71318e-06	0.524788	8.56521	5.39385e-18	2.83763e-16	0	195	54	82	10	43	7	15	15	15	0
UCHL1	0.790855	13.2611	1.94614e-40	4.82185e-39	2.59852	TRUE	0.611691	9.59591	4.15916e-22	1.53991e-20	0.158139	2.4742	0.00667674	0.113435	5	81	16	17	20	42	13	13	2	5	5
IGSF21	0.881162	13.2427	2.48666e-40	6.15331e-39	1.06966	TRUE	0.656914	9.12247	3.67143e-20	1.30044e-18	0.198659	2.76126	0.00287893	0.0543727	2	363	195	119	30	9	10	21	1	2	2
TSPAN2	0.867268	13.2386	2.62425e-40	6.48559e-39	1.47499	TRUE	0.596643	8.51937	8.02143e-18	2.66336e-16	0.281853	4.03202	2.76494e-05	0.000717677	4	40	55	84	35	8	0	4	19	1	4
SNX30	0.837432	13.2291	2.97993e-40	7.35536e-39	1.78797	TRUE	0.73315	10.9076	5.30199e-28	2.26669e-26	0.204031	3.02962	0.0012243	0.0250777	0	106	69	36	5	1	17	17	17	0	0	6
ROBO1	0.626324	13.2188	3.41824e-40	8.41608e-39	1.95052	TRUE	0.299309	5.92215	1.58883e-09	3.8161e-08	0.248297	4.92075	4.31076e-07	1.34057e-05	2	359	155	34	70	13	8	18	18	2	2
SHISA9	0.860695	13.2072	3.98561e-40	9.80071e-39	1.14925	TRUE	0.435917	6.19866	2.84727e-10	7.18149e-09	0.293589	4.16865	1.53208e-05	0.00041071	0	257	119	10	5	1	17	17	17	0	0
NEUROG2	0.732828	13.1795	5.75701e-40	1.41389e-38	1.48899	TRUE	0.36363	6.58219	2.31787e-11	6.10517e-10	0.105188	1.89943	0.0287538	0.380212	12	222	5	31	64	5	5	5	5	12	12
BATF3	0.747199	13.1393	9.80478e-40	2.40199e-38	1.21166	TRUE	0.625079	10.1743	1.29145e-24	5.11961e-23	0.0500001	0.815264	0.207461	0.50035	14	128	151	35	25	12	12	0	14	14	14	0
ARHGEF9	0.787099	13.1343	1.04642e-39	2.56035e-38	1.418	TRUE	0.445113	6.87241	3.15622e-12	8.66218e-11	0.466653	7.21793	2.63917e-13	1.18238e-11	12	379	300	1	14	5	5	5	5	12	12
PNPLA3	0.847458	13.1036	1.56917e-39	3.83459e-38	1.07638	TRUE	0.468016	6.59648	2.10523e-11	5.56003e-10	0.377246	5.31322	5.38518e-08	1.79716e-06	0	102	84	24	49	1	17	17	17	0	0
DMD	0.805563	13.0997	1.65264e-39	4.03355e-38	1.49043	TRUE	0.578884	8.81486	5.99162e-19	2.05189e-17	0.045706	0.695276	0.243441	0.50035	14	246	171	43	52	6	28	0	14	14	14
SIM2	0.707712	13.09	1.87721e-39	4.57597e-38	1.07976	TRUE	0.423939	7.62543	1.21612e-14	3.64892e-13	0.252738	4.5524	2.65184e-06	7.81339e-05	12	303	5	31	64	5	5	5	5	12	12
ABLIM1	0.616846	13.0706	2.42451e-39	5.90275e-38	2.09418	TRUE	0.22666	4.50184	3.36837e-06	6.2474e-05	0.300369	5.97298	1.16483e-09	4.36209e-08	2	386	150	34	70	13	8	18	18	2	2
NLGN3	0.758595	13.037	3.76758e-39	9.14989e-38	1.31675	TRUE	0.597241	9.44268	1.81677e-21	6.61421e-20	0.157306	2.49272	0.00633843	0.108723	2	71	256	119	30	9	10	21	1	2	2
CADPS2	0.871278	13.0275	4.26767e-39	1.03516e-37	1.21224	TRUE	0.830893	11.6064	1.91261e-31	8.81012e-30	0.0293392	0.410025	0.340894	0.50035	14	186	151	35	25	12	12	0	14	14	14	7
AFF3	0.658471	12.9105	1.96497e-38	4.7486e-37	1.60372	TRUE	0.587001	10.8589	9.04948e-28	3.82711e-26	0.0605727	1.11759	0.131872	0.50035	0	199	7	36	5	1	17	17	17	0	0	10
OGFRL1	0.870724	12.9034	2.15469e-38	5.20067e-37	1.70847	TRUE	0.793925	11.0485	1.11473e-28	4.83948e-27	0.0303952	0.424043	0.335767	0.50035	14	304	61	116	25	12	12	0	14	14	14	2
S100A13	0.825088	12.8856	2.71097e-38	6.52727e-37	1.02286	TRUE	0.0871036	1.25703	0.104372	0.497983	0.730275	10.5765	1.91572e-26	1.31902e-24	1	243	1	112	45	24	24	1	10	10	1		4
NEXN	0.822699	12.8526	4.15585e-38	9.98167e-37	1.69886	TRUE	0.685437	10.1434	1.77291e-24	6.99462e-23	0.0459873	0.679832	0.248305	0.50035	4	364	236	108	26	7	0	4	19	1	4	0
SEMA3A	0.674433	12.8361	5.14752e-38	1.23484e-36	1.57665	TRUE	0.200234	3.66246	0.000124902	0.00196864	0.0956417	1.7531	0.0397923	0.486507	13	63	258	19	41	41	6	6	6	13	13
GPX8	0.790805	12.7905	9.26167e-38	2.21907e-36	1.53765	TRUE	0.43088	6.38675	8.47262e-11	2.19049e-09	0.497472	7.38923	7.384e-14	3.36186e-12	1	122	100	68	68	18	18	3	3	16	1
CELA1	0.852805	12.7528	1.50405e-37	3.59928e-36	1.09474	TRUE	0.540994	7.5625	1.97702e-14	5.8959e-13	0.161236	2.25535	0.0120556	0.187602	2	234	295	49	22	45	10	21	1	2	2
LRRC8C	0.71169	12.7501	1.5575e-37	3.72263e-36	1.79787	TRUE	0.404076	6.69844	1.05327e-11	2.8197e-10	0.238195	3.94908	3.92258e-05	0.00100618	2	99	14	99	21	13	8	18	18	2	2
FJX1	0.834201	12.7463	1.63487e-37	3.90279e-36	2.55087	TRUE	0.406534	5.7538	4.36298e-09	1.01922e-07	0.30045	4.25391	1.05036e-05	0.000287466	2	107	216	107	30	9	10	21	1	2	2
SYT11	0.729284	12.7423	1.72123e-37	4.10396e-36	2.4855	TRUE	0.620665	10.1834	1.17594e-24	4.67116e-23	0.035031	0.574394	0.282851	0.50035	4	121	187	57	57	7	0	4	19	1	4	0
NOVA2	0.807007	12.7215	2.24699e-37	5.33809e-36	1.48539	TRUE	0.599708	8.7199	1.39219e-18	4.72648e-17	0.265086	3.85759	5.72542e-05	0.00144223	2	362	256	119	30	9	10	21	1	2	2
UBL3	0.832742	12.7165	2.39273e-37	5.67746e-36	2.25939	TRUE	0.665742	9.50328	1.01694e-21	3.73697e-20	0.125217	1.78265	0.0373213	0.464693	0	146	93	36	5	1	17	17	17	0	0
LMO3	0.851222	12.6787	3.88229e-37	9.17857e-36	1.64142	TRUE	0.682019	9.47316	1.35758e-21	4.97011e-20	0.0899401	1.24796	0.106023	0.50035	14	225	284	35	25	12	12	0	14	14	14
MYCN	0.814878	12.6736	4.14206e-37	9.78095e-36	2.81569	TRUE	0.507736	7.44321	4.91324e-14	1.45419e-12	0.460386	6.75763	7.01319e-12	2.9406e-10	0	139	279	85	10	43	7	15	15	15	0
ADAMTS19	0.759558	12.6521	5.44353e-37	1.28233e-35	1.2291	TRUE	0.683649	10.69	5.66895e-27	2.35682e-25	0.0663942	1.03903	0.149395	0.50035	14	151	151	35	25	12	12	0	14	14	14	7
RBPMS2	0.889031	12.6373	6.57693e-37	1.54747e-35	1.74849	TRUE	0.805334	10.6854	5.95956e-27	2.46718e-25	0.0447224	0.593018	0.276584	0.50035	13	125	239	56	6	28	6	6	6	13	13	1
GAS2L3	0.541492	12.614	8.83951e-37	2.07734e-35	1.91457	TRUE	0.221578	4.88447	5.18543e-07	1.03513e-05	0.0455283	1.00341	0.157832	0.50035	2	259	272	81	40	40	8	18	18	2	2
ACLY	0.85982	12.6077	9.57544e-37	2.24759e-35	2.64083	TRUE	0.786644	10.7568	2.75286e-27	1.14935e-25	0.143366	1.95475	0.0253062	0.343419	0	316	69	36	5	1	17	17	17	0	0	10
ITM2B	0.64231	12.6027	1.01975e-36	2.39076e-35	2.48217	TRUE	0.212503	3.84989	5.90855e-05	0.000981739	0.475981	8.63292	2.99013e-18	1.59012e-16	1	155	293	12	45	24	24	1	10	10	1
BHLHE41	0.784481	12.5843	1.28773e-36	3.01541e-35	1.34994	TRUE	0.543876	8.02959	4.89014e-16	1.54028e-14	0.0479141	0.70946	0.23902	0.50035	2	158	41	49	22	45	10	21	1	2	2
SLC13A4	0.806978	12.5722	1.50193e-36	3.51281e-35	1.21002	TRUE	0.590683	8.93117	2.10767e-19	7.30723e-18	0.0770625	1.16679	0.121648	0.50035	14	134	89	74	23	12	12	0	14	14	14
TAGLN2	0.767789	12.5705	1.53303e-36	3.58127e-35	2.48911	TRUE	0.424327	6.51258	3.69351e-11	9.63801e-10	0.322318	4.94425	3.82185e-07	1.19611e-05	1	49	68	53	33	33	33	3	3	16	1
SEPT4	0.859333	12.523	2.79423e-36	6.49658e-35	1.34292	TRUE	0.642366	8.71339	1.47457e-18	4.98889e-17	0.259751	3.51871	0.000216827	0.00502336	12	113	117	80	14	5	5	5	5	12	12
ADGRV1	0.779988	12.5029	3.59843e-36	8.35646e-35	1.95151	TRUE	0.124845	1.8453	0.0324972	0.309726	0.598703	8.87182	3.59792e-19	2.0172e-17	1	284	63	62	11	30	30	1	10	10	1
SLITRK6	0.838365	12.4862	4.43864e-36	1.02954e-34	1.0685	TRUE	0.648029	8.90651	2.63328e-19	9.11338e-18	0.0270179	0.372466	0.354773	0.50035	2	320	135	18	22	45	10	21	1	2	2
RNF32	0.854065	12.4787	4.87625e-36	1.12971e-34	1.28877	TRUE	0.455252	6.11582	4.80318e-10	1.20067e-08	0.390562	5.261	7.16355e-08	2.35856e-06	1	369	26	78	13	18	18	3	3	16	1
F3	0.878971	12.4444	7.5014e-36	1.7338e-34	1.0313	TRUE	0.48188	6.23512	2.25722e-10	5.72266e-09	0.34563	4.45674	4.16069e-06	0.000119539	0	67	84	24	49	1	17	17	17	0	0
MKRN1	0.821648	12.4442	7.52192e-36	1.7365e-34	2.79139	TRUE	0.714642	10.0561	4.31723e-24	1.68424e-22	0.0875164	1.23332	0.108728	0.50035	13	148	36	109	6	28	6	6	6	13	13	1
ZBTB38	0.809157	12.4155	1.07623e-35	2.48164e-34	1.31147	TRUE	0.607271	8.59654	4.10763e-18	1.3755e-16	0.1109	1.5712	0.0580683	0.50035	14	171	169	43	52	6	28	0	14	14	14
SMIM3	0.877042	12.3974	1.34916e-35	3.10734e-34	1.65698	TRUE	0.544213	7.155	4.18379e-13	1.18983e-11	0.296189	3.88705	5.07354e-05	0.00128795	2	120	250	99	21	13	8	18	18	2	2
PLXNC1	0.689232	12.3909	1.46432e-35	3.36468e-34	1.56884	TRUE	0.489929	8.2219	1.0015e-16	3.20596e-15	0.142358	2.38921	0.00844229	0.137938	13	192	81	25	9	2	27	27	6	13	13
MAML3	0.604266	12.3605	2.13759e-35	4.90023e-34	2.23207	TRUE	0.347944	6.57654	2.40758e-11	6.33297e-10	0.162963	3.08744	0.00100946	0.0209614	1	65	261	11	13	18	18	3	3	16	1
SULF2	0.83909	12.3419	2.69259e-35	6.1653e-34	2.00525	TRUE	0.722021	9.88062	2.52592e-23	9.64323e-22	0.0841346	1.15177	0.124708	0.50035	4	307	86	57	57	7	0	4	19	1	4
ACKR3	0.843365	12.3032	4.35424e-35	9.95843e-34	1.38752	TRUE	0.533074	7.41998	5.85687e-14	1.72826e-12	0.26532	3.68001	0.000116613	0.0028181	0	52	264	10	5	1	17	17	17	0	0
RGMA	0.779087	12.28	5.80172e-35	1.32535e-33	2.49912	TRUE	0.498141	7.36957	8.55901e-14	2.50303e-12	0.192036	2.84053	0.00225195	0.0440139	0	181	45	82	10	43	7	15	15	15	0
NOTCH2	0.656025	12.2	1.55373e-34	3.53289e-33	2.17088	TRUE	0.0515302	0.886742	0.187609	0.497983	0.493629	8.51106	8.61767e-18	4.47366e-16	1	295	63	62	11	30	30	1	10	10	1
NDUFA4L2	0.841129	12.1916	1.72335e-34	3.91405e-33	1.70645	TRUE	0.234463	3.19039	0.000710411	0.0100798	0.559356	7.63537	1.1259e-14	5.22305e-13	4	77	96	58	26	7	0	4	19	1	4
FAM124A	0.859117	12.188	1.7997e-34	4.08271e-33	1.09477	TRUE	0.71742	9.45323	1.6427e-21	6.00273e-20	0.0380374	0.501318	0.308074	0.50035	14	185	288	118	52	6	28	0	14	14	14
PLEKHM3	0.777526	12.1757	2.09507e-34	4.7473e-33	1.30982	TRUE	0.546933	7.97374	7.69703e-16	2.38986e-14	0.0645581	0.94284	0.172881	0.50035	14	191	169	43	52	6	28	0	14	14	14
LACTB	0.874899	12.1605	2.52314e-34	5.71068e-33	1.86857	TRUE	0.569203	7.30478	1.38865e-13	4.01908e-12	0.270563	3.47373	0.000256634	0.00587623	2	221	295	49	22	45	10	21	1	2	2
ANXA6	0.860624	12.1564	2.65188e-34	5.99515e-33	1.09305	TRUE	0.0433656	0.550306	0.291055	0.497983	0.780482	9.96555	1.0784e-23	7.0304e-22	1	376	1	112	45	24	24	1	10	10	1
PIEZO2	0.798472	12.1551	2.69505e-34	6.08573e-33	1.30345	TRUE	0.470155	6.68926	1.12153e-11	2.99018e-10	0.288944	4.12845	1.82606e-05	0.00048686	4	84	38	58	26	7	0	4	19	1	4
QPRT	0.895674	12.0808	6.67086e-34	1.50423e-32	1.62177	TRUE	0.839455	10.5553	2.40091e-26	9.83573e-25	0.0250536	0.314754	0.376474	0.50035	14	377	173	35	25	12	12	0	14	14	14	0
LRP2	0.642538	12.0807	6.67676e-34	1.50423e-32	2.22583	TRUE	0.338375	5.96958	1.18935e-09	2.8813e-08	0.239763	4.22432	1.19831e-05	0.000324785	0	167	45	82	10	43	7	15	15	15	0
SH3BP4	0.84411	12.0502	9.67114e-34	2.17385e-32	1.57019	TRUE	0.490566	6.57067	2.5045e-11	6.57909e-10	0.335343	4.49539	3.47211e-06	0.000100344	0	393	67	10	5	1	17	17	17	0	0
AR	0.818769	12.0436	1.04782e-33	2.35256e-32	1.46191	TRUE	0.504123	6.78638	5.74928e-12	1.56474e-10	0.0585212	0.789714	0.214847	0.50035	2	112	41	49	22	45	10	21	1	2	2
KCNQ3	0.761701	12.0342	1.1751e-33	2.6353e-32	1.11305	TRUE	0.47256	6.81768	4.62616e-12	1.26433e-10	0.412683	5.95167	1.32709e-09	4.96028e-08	5	141	138	54	54	3	13	13	2	5	5
WIPI1	0.857277	12.0118	1.53959e-33	3.44879e-32	1.46118	TRUE	0.0447356	0.567138	0.28531	0.497983	0.772952	9.84813	3.49148e-23	2.22446e-21	1	172	1	112	45	24	24	1	10	10	1
NEK7	0.847945	12.0086	1.60195e-33	3.58439e-32	1.39023	TRUE	0.360247	4.71559	1.20506e-06	2.34127e-05	0.451923	5.91611	1.64818e-09	6.13703e-08	0	370	119	10	5	1	17	17	17	0	0
FAM64A	0.610689	12.0006	1.76367e-33	3.94175e-32	2.63076	TRUE	0.266546	4.85015	6.16856e-07	1.22516e-05	0.222222	4.05275	2.53092e-05	0.000661308	2	521	21	99	21	13	8	18	18	2	2
TMSB4X	0.613937	11.9794	2.27897e-33	5.08183e-32	2.71925	TRUE	0.491991	9.14188	3.06885e-20	1.08897e-18	0.153755	2.85712	0.00213754	0.0420712	13	126	253	42	9	2	27	27	6	13	13
GM3453	0.86533	11.9303	4.11307e-33	9.15088e-32	1.21648	TRUE	0.769178	9.86363	2.99237e-23	1.14018e-21	0.0334048	0.428315	0.334211	0.50035	14	157	151	35	25	12	12	0	14	14	14
SPATS2L	0.847744	11.8355	1.27931e-32	2.83659e-31	1.58036	TRUE	0.57155	7.37491	8.2228e-14	2.4119e-12	0.422766	5.45893	2.39511e-08	8.20231e-07	2	260	14	99	21	13	8	18	18	2	2
DRAXIN	0.759737	11.8311	1.34867e-32	2.98701e-31	1.18945	TRUE	0.224092	3.4678	0.000262369	0.00393313	0.520066	8.07305	3.42814e-16	1.67339e-14	8	203	12	106	51	0	3	8	8	8	8
PNP	0.76198	11.8165	1.60445e-32	3.54951e-31	2.62277	TRUE	0.649761	9.40803	2.52749e-21	9.16765e-20	0.0320402	0.464011	0.32132	0.50035	11	90	200	27	56	17	2	11	11	11	11
RASL11B	0.85929	11.8089	1.75536e-32	3.87899e-31	1.40325	TRUE	0.477195	6.07297	6.27839e-10	1.55165e-08	0.361665	4.59903	2.1223e-06	6.31957e-05	0	116	119	10	5	1	17	17	17	0	0
PDLIM4	0.759686	11.8073	1.78927e-32	3.94947e-31	1.69683	TRUE	0.633545	9.32603	5.49529e-21	1.98224e-19	0.0248911	0.367114	0.356767	0.50035	2	154	135	18	22	45	10	21	1	2	2
MBP	0.835872	11.7959	2.04837e-32	4.51631e-31	1.55226	TRUE	0.594465	7.95553	8.9185e-16	2.75603e-14	0.139957	1.87113	0.0306637	0.398222	13	198	83	56	6	28	6	6	6	13	13
TLE1	0.850689	11.7903	2.19033e-32	4.82388e-31	2.05473	TRUE	0.667924	8.70811	1.54487e-18	5.21773e-17	0.14973	1.95262	0.0254323	0.344177	14	83	89	74	23	12	12	0	14	14	14
SHF	0.756512	11.7775	2.5498e-32	5.60927e-31	1.68556	TRUE	0.615664	8.99585	1.17202e-19	4.09228e-18	0.0684724	1.00005	0.158644	0.50035	2	138	195	119	30	9	10	21	1	2	2
1810041L15RIK	0.825296	11.7745	2.64241e-32	5.8065e-31	1.15145	TRUE	0.362344	4.97258	3.3034e-07	6.79483e-06	0.35735	4.91767	4.37909e-07	1.35967e-05	4	147	96	58	26	7	0	4	19	1	4
AQP11	0.837245	11.7675	2.86924e-32	6.29789e-31	1.77978	TRUE	0.585856	7.69163	7.26381e-15	2.18952e-13	0.441909	5.81065	3.11158e-09	1.12654e-07	13	187	15	19	41	41	6	6	6	13	13
C1QL1	0.802555	11.7628	3.03466e-32	6.65353e-31	1.85665	TRUE	0.421987	5.85606	2.36994e-09	5.65759e-08	0.269525	3.74385	9.06109e-05	0.00222814	14	60	110	48	23	12	12	0	14	14	14
GNAZ	0.794692	11.7586	3.18762e-32	6.98111e-31	1.45798	TRUE	0.603138	8.2526	7.74894e-17	2.4846e-15	0.12174	1.66833	0.047625	0.50035	2	92	41	49	22	45	10	21	1	2	2
GSE1	0.784447	11.7409	3.93448e-32	8.60717e-31	1.41557	TRUE	0.311177	4.51182	3.21373e-06	5.96623e-05	0.364651	5.32378	5.08158e-08	1.70164e-06	4	237	96	58	26	7	0	4	19	1	4
BTG1	0.736851	11.7289	4.53226e-32	9.89283e-31	2.2875	TRUE	0.0851042	1.24276	0.106977	0.497983	0.588626	8.62243	3.27733e-18	1.73813e-16	1	104	63	62	11	30	30	1	10	10	1
HEG1	0.781376	11.7142	5.39332e-32	1.17592e-30	1.41036	TRUE	0.597232	8.37801	2.69146e-17	8.81713e-16	0.194306	2.72833	0.00318279	0.0593688	4	145	86	57	57	7	0	4	19	1	4
FLNB	0.808202	11.7103	5.64686e-32	1.22847e-30	1.56107	TRUE	0.222361	2.97717	0.00145461	0.0197125	0.409006	5.49294	1.97649e-08	6.81628e-07	1	130	48	3	32	30	30	1	10	10	1
GPM6B	0.821227	11.7061	5.9319e-32	1.28906e-30	1.29582	TRUE	0.677225	9.05772	6.66002e-20	2.34211e-18	0.0375862	0.504449	0.306973	0.50035	2	98	135	18	22	45	10	21	1	2	2
TMEM218	0.774709	11.6869	7.43532e-32	1.61219e-30	1.77985	TRUE	0.630496	8.8171	5.87296e-19	2.01477e-17	0.118318	1.65612	0.0488488	0.50035	2	478	195	119	30	9	10	21	1	2	2
ARL4C	0.74807	11.6504	1.14175e-31	2.47018e-30	2.46287	TRUE	0.318148	4.60984	2.01485e-06	3.86107e-05	0.228322	3.31282	0.0004618	0.0100353	14	196	4	41	8	6	28	0	14	14	14
EDNRA	0.820466	11.5844	2.47327e-31	5.32744e-30	1.12243	TRUE	0.149496	1.90715	0.0282503	0.275388	0.650373	8.33066	4.01961e-17	2.03291e-15	1	153	63	62	11	30	30	1	10	10	1
NRXN3	0.801643	11.5479	3.78096e-31	8.13527e-30	1.32898	TRUE	0.735103	9.93352	1.48775e-23	5.73557e-22	0.0348388	0.470981	0.318827	0.50035	4	184	140	57	57	7	0	4	19	1	4
RBM11	0.791747	11.5367	4.30831e-31	9.2598e-30	1.07417	TRUE	0.371185	5.24241	7.92468e-08	1.70886e-06	0.525612	7.43843	5.09457e-14	2.33577e-12	12	66	73	80	14	5	5	5	5	12	12
INSL6	0.863736	11.5324	4.53083e-31	9.72741e-30	1.29427	TRUE	0.638596	7.94669	9.5779e-16	2.94588e-14	0.189118	2.34416	0.00953506	0.153997	0	110	84	24	49	1	17	17	17	0	0
PALM3	0.823033	11.5294	4.68987e-31	1.00579e-29	1.39101	TRUE	0.381715	4.92925	4.12733e-07	8.3668e-06	0.055069	0.711012	0.238538	0.50035	4	190	71	37	4	21	21	12	12	1	4
CDH20	0.760603	11.5187	5.3079e-31	1.13708e-29	1.3578	TRUE	0.564794	8.00511	5.96815e-16	1.86783e-14	0.13649	1.93631	0.0264151	0.355262	14	85	4	41	8	6	28	0	14	14	14
D8ERTD82E	0.706474	11.4534	1.13087e-30	2.41206e-29	1.93373	TRUE	0.415371	6.29051	1.58217e-10	4.03731e-09	0.363652	5.50714	1.82359e-08	6.30007e-07	0	124	54	82	10	43	7	15	15	15	0
CCDC112	0.859987	11.452	1.14872e-30	2.44748e-29	1.92285	TRUE	0.645431	7.97635	7.53651e-16	2.34372e-14	0.0595811	0.736281	0.23078	0.50035	14	72	171	43	52	6	28	0	14	14	14
PDLIM2	0.872629	11.4152	1.75468e-30	3.73046e-29	1.1699	TRUE	0.219807	2.60819	0.00455111	0.0559214	0.61905	7.38685	7.51764e-14	3.41478e-12	4	70	112	58	26	7	0	4	19	1	4
FGFRL1	0.805721	11.4052	1.97046e-30	4.18468e-29	1.58402	TRUE	0.501122	6.71094	9.66873e-12	2.60617e-10	0.247336	3.31545	0.000457471	0.00996331	4	55	86	57	57	7	0	4	19	1	4
OTX2OS1	0.830063	11.3689	2.98693e-30	6.316e-29	1.06332	TRUE	0.727575	9.30114	6.9472e-21	2.49223e-19	0.204062	2.60961	0.0045323	0.0817171	12	68	117	80	14	5	5	5	5	12	12
NID2	0.773204	11.3531	3.57856e-30	7.5589e-29	1.37118	TRUE	0.426666	6.10291	5.20772e-10	1.29192e-08	0.154549	2.21195	0.0134851	0.207382	14	179	136	74	23	12	12	0	14	14	14
RTN1	0.871093	11.3508	3.67292e-30	7.74985e-29	2.09076	TRUE	0.684854	8.3775	2.70317e-17	8.84071e-16	0.115722	1.41449	0.0786092	0.50035	13	78	83	56	6	28	6	6	6	13	13
JPH4	0.844172	11.3489	3.75584e-30	7.91632e-29	1.41088	TRUE	0.73457	9.23315	1.31397e-20	4.69653e-19	0.0717105	0.9017	0.183608	0.50035	4	54	140	57	57	7	0	4	19	1	4
ADGRL2	0.7532	11.313	5.65876e-30	1.19016e-28	3.00669	TRUE	0.52636	7.37277	8.35564e-14	2.4472e-12	0.313548	4.38323	5.84673e-06	0.000164606	0	74	87	110	10	43	7	15	15	15	0
D1ERTD622E	0.867298	11.2992	6.62034e-30	1.39091e-28	1.63844	TRUE	0.751192	9.12181	3.694e-20	1.30608e-18	0.0931516	1.13096	0.129035	0.50035	0	69	27	10	5	1	17	17	17	0	0
PRKG2	0.841808	11.2963	6.8407e-30	1.43413e-28	1.23167	TRUE	0.403243	4.99415	2.95471e-07	6.11607e-06	0.096535	1.1964	0.11577	0.50035	10	56	17	14	3	11	11	24	4	4	10
CNN2	0.835449	11.2823	8.02246e-30	1.68009e-28	1.49366	TRUE	0.0502986	0.621943	0.26699	0.497983	0.653942	8.11712	2.38683e-16	1.17386e-14	1	41	1	112	45	24	24	1	10	10	1
RSPO2	0.801107	11.2729	8.93357e-30	1.86891e-28	1.04262	TRUE	0.596193	7.71739	5.93701e-15	1.7951e-13	0.402825	5.21883	9.00271e-08	2.94434e-06	5	159	298	32	65	3	13	13	2	5	5
COL23A1	0.867386	11.2698	9.24824e-30	1.93268e-28	1.27879	TRUE	0.809941	9.89337	2.2239e-23	8.52335e-22	0.110432	1.34639	0.0890879	0.50035	13	95	83	56	6	28	6	6	6	13	13
KIF5C	0.87314	11.2677	9.47603e-30	1.97817e-28	2.15432	TRUE	0.728809	8.74264	1.13861e-18	3.87898e-17	0.0740384	0.88732	0.187453	0.50035	4	180	140	57	57	7	0	4	19	1	4
SLITRK2	0.739758	11.218	1.66297e-29	3.46784e-28	1.20575	TRUE	0.257364	3.79406	7.41016e-05	0.00120572	0.426616	6.29541	1.53295e-10	5.99224e-09	8	51	12	106	51	0	3	8	8	8	8
SPSB4	0.760864	11.1128	5.43687e-29	1.13017e-27	1.98749	TRUE	0.443691	6.10493	5.14234e-10	1.27894e-08	0.0908628	1.25363	0.104988	0.50035	2	231	135	18	22	45	10	21	1	2	2
IGFBPL1	0.760891	11.091	6.94001e-29	1.43957e-27	2.17595	TRUE	0.261559	3.5896	0.000165592	0.00255256	0.204912	2.82071	0.00239587	0.046365	12	76	10	63	63	31	31	5	5	12	12
PROX1	0.801059	11.0625	9.53518e-29	1.97581e-27	1.38916	TRUE	0.161373	2.06106	0.0196488	0.203466	0.604204	7.75011	4.59071e-15	2.15511e-13	1	183	26	78	13	18	18	3	3	16	1
MBNL2	0.823494	11.0232	1.47603e-28	3.05207e-27	1.563	TRUE	0.0774852	0.945897	0.1721	0.497983	0.733881	8.99754	1.15417e-19	6.66127e-18	1	91	1	112	45	24	24	1	10	10	1
EDNRB	0.840686	11.0172	1.57821e-28	3.25992e-27	1.13766	TRUE	0.701088	8.73395	1.22962e-18	4.18176e-17	0.0356621	0.444055	0.328501	0.50035	13	38	148	56	6	28	6	6	6	13	13
PCBD1	0.769307	10.993	2.06565e-28	4.26227e-27	2.03058	TRUE	0.164085	2.15771	0.0154753	0.164414	0.0978107	1.28616	0.0991934	0.50035	4	80	71	37	4	21	21	12	12	1	4
DLX5	0.714211	10.9927	2.07119e-28	4.26922e-27	1.02885	TRUE	0.119712	1.91318	0.0278627	0.272422	0.0931877	1.49343	0.0676629	0.50035	8	96	149	23	47	0	3	8	8	8	8
GM28050	0.833129	10.9794	2.40127e-28	4.9444e-27	1.19507	TRUE	0.309296	3.802	7.17659e-05	0.00116868	0.26269	3.22679	0.000625933	0.0133218	12	45	180	31	64	5	5	5	5	12	12
GUCY1A3	0.852635	10.9471	3.43179e-28	7.05891e-27	1.09882	TRUE	0.534134	6.41074	7.24096e-11	1.87701e-09	0.20025	2.40477	0.00809138	0.133651	14	79	23	48	23	12	12	0	14	14	14
DST	0.577865	10.9436	3.56676e-28	7.32886e-27	2.34071	TRUE	0.103382	1.81966	0.0344055	0.323963	0.399184	7.05387	8.70027e-13	3.77711e-11	1	73	276	3	32	30	30	1	10	10	1
ANK3	0.724519	10.9412	3.66265e-28	7.518e-27	1.93992	TRUE	0.520625	7.36577	8.80654e-14	2.57159e-12	0.159808	2.26339	0.0118058	0.184447	2	238	35	107	30	9	10	21	1	2	2
FRAT2	0.851699	10.9267	4.29362e-28	8.80394e-27	2.21476	TRUE	0.429961	5.14622	1.32897e-07	2.82846e-06	0.483153	5.77474	3.85354e-09	1.38749e-07	0	119	54	82	10	43	7	15	15	15	0
COPZ2	0.829114	10.9154	4.86452e-28	9.96415e-27	1.58971	TRUE	0.621865	7.6063	1.4103e-14	4.2251e-13	0.228566	2.80076	0.00254914	0.0488494	1	53	92	78	13	18	18	3	3	16	1
MYO6	0.822281	10.9114	5.08297e-28	1.04008e-26	1.30389	TRUE	0.24189	2.92038	0.00174804	0.0232713	0.676361	8.18432	1.36923e-16	6.76784e-15	1	39	131	12	45	24	24	1	10	10	1
FAM57B	0.852086	10.8754	7.551e-28	1.54187e-26	1.4915	TRUE	0.695227	8.26113	7.21474e-17	2.3171e-15	0.0943323	1.12127	0.131087	0.50035	14	61	288	118	52	6	28	0	14	14	14
TFAP2B	0.677509	10.8561	9.33197e-28	1.90355e-26	1.21486	TRUE	0.110581	1.92131	0.027346	0.268843	0.231633	4.07828	2.26846e-05	0.000599919	8	59	106	23	47	0	3	8	8	8	8
CDH6	0.797142	10.8532	9.6331e-28	1.96293e-26	1.29807	TRUE	0.658737	8.40798	2.0857e-17	6.8441e-16	0.0959324	1.22666	0.109975	0.50035	14	75	169	43	52	6	28	0	14	14	14
IRS1	0.802919	10.8438	1.06681e-27	2.17158e-26	1.24119	TRUE	0.0609012	0.753087	0.225699	0.497983	0.745891	9.28119	8.38007e-21	5.01348e-19	1	188	6	112	45	24	24	1	10	10	1
PRSS8	0.871062	10.7554	2.79372e-27	5.66919e-26	1.0366	TRUE	0.315976	3.58881	0.000166095	0.00255831	0.16651	1.89238	0.0292199	0.384562	10	35	17	14	3	11	11	24	4	4	10
RIPK4	0.858854	10.7291	3.71552e-27	7.53199e-26	1.03941	TRUE	0.830712	9.70894	1.381e-22	5.17163e-21	0.0381406	0.446148	0.327745	0.50035	14	101	173	35	25	12	12	0	14	14	14
EMILIN2	0.772909	10.7239	3.93051e-27	7.95137e-26	1.51361	TRUE	0.559889	7.30637	1.37228e-13	3.9776e-12	0.182906	2.38685	0.00849679	0.138713	0	178	27	10	5	1	17	17	17	0	0
TRP53INP1	0.787096	10.7194	4.12868e-27	8.34367e-26	1.42663	TRUE	0.397094	5.01199	2.69344e-07	5.58704e-06	0.288964	3.65505	0.000128564	0.00308789	4	36	112	58	26	7	0	4	19	1	4
CXCR4	0.709996	10.717	4.23467e-27	8.54907e-26	1.70786	TRUE	0.419357	5.88335	2.01027e-09	4.81069e-08	0.196401	2.76025	0.00288786	0.0544367	1	47	94	11	13	18	18	3	3	16	1
GRK3	0.797829	10.7124	4.45319e-27	8.98097e-26	1.36211	TRUE	0.116672	1.42246	0.0774464	0.497983	0.70552	8.63948	2.82355e-18	1.50971e-16	1	97	6	112	45	24	24	1	10	10	1
ASXL3	0.806736	10.7081	4.66042e-27	9.38926e-26	1.22636	TRUE	0.712152	8.7848	7.83244e-19	2.67297e-17	0.0487417	0.602293	0.273489	0.50035	14	42	151	35	25	12	12	0	14	14	14
EPHB2	0.652397	10.7004	5.06664e-27	1.01972e-25	1.99101	TRUE	0.124056	1.90756	0.0282238	0.275266	0.411696	6.33458	1.18998e-10	4.67955e-09	1	118	63	62	11	30	30	1	10	10	1
EPCAM	0.804885	10.6857	5.93678e-27	1.19362e-25	1.37491	TRUE	0.592313	7.56034	2.01013e-14	5.98555e-13	0.0392515	0.502353	0.307709	0.50035	14	26	288	118	52	6	28	0	14	14	14
RGMB	0.815117	10.6829	6.12266e-27	1.22973e-25	1.85082	TRUE	0.5574	6.93522	2.02788e-12	5.6364e-11	0.166843	2.07445	0.0190189	0.2729	12	37	5	31	64	5	5	5	5	12	12
DLL3	0.692007	10.6532	8.42097e-27	1.68617e-25	1.22613	TRUE	0.229636	3.89863	4.83701e-05	0.000809868	0.107924	1.86675	0.0309684	0.401382	12	25	95	63	63	31	31	5	5	12	12
PRRX2	0.843275	10.616	1.25531e-26	2.51101e-25	1.93079	TRUE	0.603691	7.19221	3.18763e-13	9.11821e-12	0.0863324	1.02753	0.152086	0.50035	10	189	154	2	28	11	11	24	4	4	10
NES	0.700843	10.6066	1.38828e-26	2.77134e-25	2.64614	TRUE	0.503408	7.19921	3.02811e-13	8.67455e-12	0.0951842	1.36	0.0869154	0.50035	0	58	7	36	5	1	17	17	17	0	0
PHLDB2	0.630289	10.6059	1.39844e-26	2.78878e-25	1.98125	TRUE	0.359183	5.55203	1.41184e-08	3.19913e-07	0.315178	4.87765	5.36794e-07	1.65361e-05	1	89	94	11	13	18	18	3	3	16	1
MPPED2	0.871937	10.6053	1.40775e-26	2.8045e-25	1.68749	TRUE	0.75897	8.63148	3.02821e-18	1.01926e-16	0.0874504	0.993793	0.160162	0.50035	14	129	89	74	23	12	12	0	14	14	14
PMAIP1	0.74973	10.6005	1.48163e-26	2.94869e-25	1.41149	TRUE	0.395298	5.38049	3.71409e-08	8.15231e-07	0.181335	2.47046	0.006747	0.11453	2	33	98	49	22	45	10	21	1	2	2
SMIM14	0.866001	10.5929	1.60707e-26	3.19186e-25	2.00507	TRUE	0.607577	6.93755	1.99477e-12	5.55226e-11	0.17358	1.98452	0.0235991	0.323836	4	62	38	58	26	7	0	4	19	1	4
NPL	0.858507	10.5865	1.72056e-26	3.41381e-25	1.47722	TRUE	0.613692	6.98339	1.44067e-12	4.03861e-11	0.0816368	0.930569	0.176038	0.50035	2	30	195	119	30	9	10	21	1	2	2
RHOB	0.867043	10.5609	2.26128e-26	4.47761e-25	1.84143	TRUE	0.621006	7.02104	1.10115e-12	3.10459e-11	0.233871	2.64388	0.00409813	0.0747375	5	34	70	32	65	3	13	13	2	5	5
TENM2	0.785539	10.5594	2.29694e-26	4.54363e-25	1.07649	TRUE	0.657355	8.28662	5.82566e-17	1.87405e-15	0.107808	1.35698	0.0873938	0.50035	0	18	27	10	5	1	17	17	17	0	0
ARID5B	0.837821	10.5576	2.34152e-26	4.62715e-25	1.42436	TRUE	0.14776	1.73881	0.0410344	0.375719	0.448334	5.28716	6.21147e-08	2.05891e-06	1	12	28	117	11	30	30	1	10	10	1
LY6H	0.798484	10.5507	2.51998e-26	4.97481e-25	1.61734	TRUE	0.491258	5.94386	1.39198e-09	3.3515e-08	0.296726	3.59977	0.00015925	0.00376957	1	115	100	68	68	18	18	3	3	16	1
PARM1	0.845366	10.5366	2.93024e-26	5.77891e-25	1.1151	TRUE	0.417727	4.77066	9.18113e-07	1.80161e-05	0.305271	3.47483	0.000255592	0.0058592	0	93	84	24	49	1	17	17	17	0	0
PDZRN4	0.815007	10.5146	3.69874e-26	7.27257e-25	1.41119	TRUE	0.172237	2.06357	0.0195293	0.202442	0.509788	6.10653	5.09106e-10	1.93608e-08	1	94	111	83	11	30	30	1	10	10	1
SLC25A4	0.47916	10.4912	4.74243e-26	9.31538e-25	2.97052	TRUE	0.410293	8.50096	9.40141e-18	3.11103e-16	0.0603822	1.24848	0.105928	0.50035	3	29	244	33	16	16	4	10	21	3	3
RBMS1	0.814213	10.4847	5.07872e-26	9.96597e-25	2.55609	TRUE	0.319215	3.85039	5.89647e-05	0.000980562	0.376084	4.53563	2.87153e-06	8.41016e-05	1	44	104	62	11	30	30	1	10	10	1
FAM195A	0.653601	10.484	5.11551e-26	1.00281e-24	1.73191	TRUE	0.231651	3.44717	0.00028325	0.00423322	0.286589	4.25924	1.02563e-05	0.000281483	12	48	175	80	14	5	5	5	5	12	12
MDFI	0.780467	10.4774	5.48392e-26	1.07289e-24	1.44634	TRUE	0.453537	5.80033	3.30925e-09	7.79561e-08	0.283769	3.62671	0.000143527	0.00341385	2	64	250	99	21	13	8	18	18	2	2
TSPO	0.768265	10.4744	5.66145e-26	1.10652e-24	1.89712	TRUE	0.299732	3.78905	7.56115e-05	0.00122723	0.368089	4.66121	1.5718e-06	4.71612e-05	4	50	72	37	4	21	21	12	12	1	4
LFNG	0.78661	10.4673	6.10447e-26	1.19192e-24	1.83844	TRUE	0.377188	4.66486	1.54411e-06	2.97935e-05	0.253953	3.13991	0.000844996	0.0176962	12	23	5	31	64	5	5	5	5	12	12
DENND1A	0.778139	10.4584	6.70858e-26	1.30727e-24	1.70781	TRUE	0.636551	8.01205	5.64064e-16	1.76815e-14	0.0673785	0.848405	0.198106	0.50035	14	20	169	43	52	6	28	0	14	14	14
FSTL1	0.729324	10.4537	7.04665e-26	1.37179e-24	2.21666	TRUE	0.161988	2.13267	0.0164759	0.173914	0.485236	6.4122	7.17157e-11	2.87787e-09	1	46	104	62	11	30	30	1	10	10	1
TES	0.780466	10.3996	1.24488e-25	2.42104e-24	1.46208	TRUE	0.458809	5.97242	1.16881e-09	2.83506e-08	0.306963	4.00195	3.14107e-05	0.00080995	14	17	136	74	23	12	12	0	14	14	14
DUSP4	0.74803	10.3901	1.37534e-25	2.67211e-24	1.79506	TRUE	0.210149	2.78757	0.00265522	0.0341885	0.0914842	1.21507	0.112169	0.50035	2	24	170	81	40	40	8	18	18	2	2
CNIH2	0.807671	10.3776	1.56723e-25	3.04192e-24	1.88024	TRUE	0.274796	3.23732	0.000603288	0.00867911	0.333907	3.94796	3.94105e-05	0.0010096	1	57	28	117	11	30	30	1	10	10	1
PMP22	0.856258	10.3425	2.26349e-25	4.38897e-24	1.34357	TRUE	0.497805	5.55897	1.35687e-08	3.08171e-07	0.0620248	0.692254	0.244389	0.50035	10	11	17	14	3	11	11	24	4	4	10
ETL4	0.668134	10.2827	4.21439e-25	8.14768e-24	1.64726	TRUE	0.126404	1.80997	0.0351504	0.32994	0.475486	6.83357	4.14129e-12	1.74762e-10	1	28	276	3	32	30	30	1	10	10	1
PALLD	0.8203	10.28	4.33825e-25	8.37888e-24	2.68286	TRUE	0.608473	7.22462	2.51261e-13	7.21887e-12	0.131151	1.55733	0.0596957	0.50035	4	31	187	57	57	7	0	4	19	1	4
STOX2	0.569775	10.2624	5.20374e-25	1.00406e-23	2.73561	TRUE	0.481334	8.16337	1.62897e-16	5.16402e-15	0.0437092	0.741907	0.229072	0.50035	4	32	263	57	57	7	0	4	19	1	4
PPP1R14A	0.845292	10.1914	1.08265e-24	2.08283e-23	1.13093	TRUE	0.726092	8.41358	1.98835e-17	6.53559e-16	0.129078	1.49756	0.0671237	0.50035	4	27	236	108	26	7	0	4	19	1	4
ZCCHC18	0.826929	10.1906	1.09249e-24	2.0997e-23	1.77855	TRUE	0.577764	6.70704	9.93027e-12	2.66934e-10	0.0660707	0.767628	0.221354	0.50035	2	88	98	49	22	45	10	21	1	2	2
SRRM4	0.704155	10.1851	1.15516e-24	2.21798e-23	1.35044	TRUE	0.173746	2.68343	0.00364354	0.0456268	0.137583	2.1608	0.0153554	0.230015	12	19	10	63	63	31	31	5	5	12	12
IFT57	0.885258	10.1713	1.33154e-24	2.55165e-23	1.97887	TRUE	0.790906	8.449	1.46905e-17	4.84492e-16	0.114829	1.22668	0.109972	0.50035	4	8	86	57	57	7	0	4	19	1	4
GLI1	0.678269	10.1684	1.37158e-24	2.6258e-23	1.26915	TRUE	0.0735841	1.08907	0.138063	0.497983	0.480089	7.10745	5.91019e-13	2.61206e-11	1	16	145	83	11	30	30	1	10	10	1
SRGAP1	0.805077	10.1335	1.96191e-24	3.75231e-23	1.56898	TRUE	0.59102	6.90429	2.52267e-12	6.97217e-11	0.276623	3.23456	0.000609142	0.0129926	2	22	256	119	30	9	10	21	1	2	2
LRRC8B	0.667607	10.1201	2.25079e-24	4.3006e-23	1.61592	TRUE	0.478186	6.67458	1.23969e-11	3.30075e-10	0.164261	2.29187	0.0109565	0.172829	2	15	14	99	21	13	8	18	18	2	2
SMAD3	0.792348	10.1036	2.6612e-24	5.07984e-23	1.58365	TRUE	0.0889308	1.04037	0.149085	0.497983	0.70299	8.26648	6.89862e-17	3.44716e-15	1	5	6	112	45	24	24	1	10	10	1
PDZD2	0.680316	10.0958	2.88431e-24	5.50038e-23	1.71031	TRUE	0.122464	1.70572	0.0440305	0.397387	0.420568	5.87816	2.07425e-09	7.65095e-08	1	13	111	83	11	30	30	1	10	10	1
RND1	0.787632	10.0923	2.98856e-24	5.69363e-23	1.2698	TRUE	0.56802	6.78484	5.81068e-12	1.57927e-10	0.354289	4.22605	1.18913e-05	0.000322742	5	14	298	32	65	3	13	13	2	5	5
5730508B09RIK	0.854761	10.0765	3.50749e-24	6.6758e-23	1.14703	TRUE	0.622656	6.76256	6.77891e-12	1.83733e-10	0.0520163	0.563984	0.286382	0.50035	10	43	133	2	28	11	11	24	4	4	10
TNFAIP8	0.79394	10.0615	4.08676e-24	7.76326e-23	2.22339	TRUE	0.661891	7.86211	1.88852e-15	5.78134e-14	0.0827447	0.984131	0.162526	0.50035	14	21	151	35	25	12	12	0	14	14	14
KCNK2	0.867703	10.0539	4.41671e-24	8.38192e-23	1.16651	TRUE	0.709923	7.65241	9.86268e-15	2.96379e-13	0.094859	1.0216	0.153486	0.50035	14	9	288	118	52	6	28	0	14	14	14
ZIC4	0.75825	10.0288	5.69602e-24	1.07993e-22	1.06737	TRUE	0.152476	2.05117	0.0201254	0.207853	0.523533	7.07787	7.3196e-13	3.19894e-11	8	10	12	106	51	0	3	8	8	8	8
ISYNA1	0.539386	10.0239	5.98344e-24	1.13333e-22	2.25982	TRUE	0.435432	7.55279	2.13014e-14	6.3333e-13	0.0628603	1.08773	0.138358	0.50035	12	4	175	80	14	5	5	5	5	12	12
WDR86	0.864311	10.0047	7.26382e-24	1.3732e-22	1.71129	TRUE	0.640118	6.88935	2.80242e-12	7.71274e-11	0.165239	1.78127	0.0374344	0.465446	14	6	169	43	52	6	28	0	14	14	14
DCN	0.867423	191.736	0	0	0.919219	FALSE	0.056578	11.1746	2.71339e-29	1.19921e-27	0.717756	143.219	0	0
VTN	0.887598	140.473	0	0	0.969484	FALSE	0.0656065	9.2713	9.19429e-21	3.29233e-19	0.802471	114.166	0	0
HOXA3	0.912428	124.588	0	0	0.98867	FALSE	0.272003	33.2035	4.79272e-242	6.57675e-240	0.0196758	2.40378	0.00811324	0.13384
FERD3L	0.906883	117.974	0	0	0.844626	FALSE	0.0686164	7.97078	7.88392e-16	2.44401e-14	0.850477	99.2848	0	0
HALR1	0.888161	100.838	0	0	0.803568	FALSE	0.0571626	5.81531	3.02608e-09	7.17159e-08	0.788071	80.6783	0	0
5730596B20RIK	0.908434	84.9557	0	0	0.555721	FALSE	0.217247	18.0344	5.22843e-73	3.74443e-71	0.0197681	1.64531	0.0499531	0.50035
1700011H14RIK	0.915755	84.8804	0	0	0.812655	FALSE	0.246132	20.981	4.8933e-98	4.21145e-96	0.0143564	1.22075	0.111091	0.50035
BMP3	0.900468	66.6315	0	0	0	FALSE	0.0574118	3.78501	7.68505e-05	0.00124528	0.797803	53.1876	0	0
HOXD3	0.920964	66.3751	0	0	0.544691	FALSE	0.241545	15.7933	1.73118e-56	1.09232e-54	0.0175618	1.14687	0.125717	0.50035
KLHL4	0.911256	65.88	0	0	0.875513	FALSE	0.343479	22.1726	3.1605e-109	2.84489e-107	0.0242286	1.56583	0.058694	0.50035
TTC6	0.888884	62.22	0	0	0.812826	FALSE	0.0724522	4.60604	2.05201e-06	3.92461e-05	0.861974	54.9948	0	0
WNT9B	0.871522	51.0732	0	0	0	FALSE	0.205891	10.7635	2.56035e-27	1.07125e-25	0.0189224	0.990321	0.161009	0.50035
GPR37	0.892754	50.7799	0	0	0	FALSE	0.062719	3.19481	0.000699618	0.00994187	0.857705	43.9233	0	0
COL8A2	0.882184	45.6801	0	0	0	FALSE	0.0530868	2.41955	0.00776978	0.0902168	0.777457	35.8277	2.04376e-281	7.86367e-279
EPAS1	0.848702	43.081	0	0	0	FALSE	0.0596181	2.69219	0.0035492	0.0445877	0.779541	35.6427	1.53015e-278	5.77426e-276
CRYBA2	0.87232	42.092	0	0	0	FALSE	0.21684	9.91633	1.76766e-23	6.78804e-22	0.0142153	0.647482	0.25866	0.50035
BARX2	0.897444	41.4692	0	0	0.690263	FALSE	0.0684404	2.82996	0.00232772	0.03035	0.788065	32.8332	9.88605e-237	3.23323e-234
PAPPA2	0.854414	40.2181	0	0	0.604584	FALSE	0.418553	18.3742	1.05704e-75	7.76868e-74	0.0329057	1.43964	0.074984	0.50035
PKD1L1	0.906599	39.08	0	0	0	FALSE	0.0638226	2.47382	0.00668387	0.0784436	0.874215	34.0491	2.09462e-254	7.33976e-252
HNF1B	0.875712	38.7437	0	0	0	FALSE	0.209141	8.43373	1.67405e-17	5.51172e-16	0.014776	0.594976	0.27593	0.50035
ADAMTS16	0.869043	38.2982	0	0	0	FALSE	0.0625419	2.48209	0.00653066	0.0767832	0.826897	32.9393	3.00967e-238	1.001e-235
ONECUT3	0.858023	36.0328	1.28145e-284	8.94873e-283	0.774386	FALSE	0.392716	15.2387	9.78877e-53	5.98396e-51	0.0371714	1.44288	0.0745272	0.50035
CRYBB1	0.904478	35.9061	1.22493e-282	8.52367e-281	0	FALSE	0.208943	7.40473	6.57078e-14	1.93601e-12	0.0175241	0.62105	0.267283	0.50035
MYH7	0.877492	35.626	2.77205e-278	1.90863e-276	0.899804	FALSE	0.0686864	2.55076	0.00537443	0.0645821	0.81825	30.6075	4.86612e-206	1.36411e-203
RASSF10	0.887756	34.1509	6.49224e-256	4.23247e-254	0.763791	FALSE	0.240563	8.37576	2.74336e-17	8.95722e-16	0.0554147	1.92911	0.0268584	0.359756
CRYGE	0.912472	32.9387	3.0741e-238	1.93343e-236	0.569001	FALSE	0.321437	10.373	1.64581e-25	6.65891e-24	0.0294592	0.951536	0.170666	0.50035
BHLHE40	0.878279	32.6312	7.41314e-234	4.64754e-232	0.746957	FALSE	0.546127	18.807	3.30726e-79	2.47703e-77	0.0370545	1.27311	0.10149	0.50035
AW112010	0.871686	32.452	2.53584e-231	1.57471e-229	0	FALSE	0.0632224	2.10727	0.0175471	0.183739	0.792338	26.5907	4.34875e-156	1.00395e-153
SERTM1	0.843252	32.2373	2.64651e-228	1.63825e-226	0.686858	FALSE	0.0609317	2.07421	0.0190297	0.197996	0.78516	26.7784	2.8876e-158	6.74565e-156
CYP24A1	0.800186	29.824	9.544e-196	5.57386e-194	0	FALSE	0.178427	6.04335	7.54744e-10	1.84668e-08	0.0145192	0.491937	0.311382	0.50035
SLIT1	0.887295	29.4325	1.05528e-190	6.03728e-189	0.875416	FALSE	0.190517	5.7441	4.62052e-09	1.0781e-07	0.682763	20.6989	1.77365e-95	2.8764e-93
ISLR	0.895616	27.8041	1.93311e-170	1.03927e-168	0.652881	FALSE	0.089154	2.48222	0.00652827	0.0767832	0.837662	23.4567	5.65085e-122	1.14316e-119
THBD	0.846147	26.3342	3.89753e-153	2.00213e-151	0	FALSE	0.0616651	1.68978	0.0455346	0.409123	0.761594	21.0994	4.02584e-99	6.86948e-97
CPN1	0.901267	26.1206	1.06359e-150	5.40694e-149	0.948427	FALSE	0.141692	3.72761	9.66518e-05	0.00154195	0.159526	4.1961	1.35773e-05	0.000366981
GM17455	0.85405	25.4362	5.01174e-143	2.46479e-141	0.819449	FALSE	0.081348	2.16549	0.0151751	0.161661	0.731019	19.5787	1.17555e-85	1.76091e-83
TFAP2E	0.669383	24.9374	1.46317e-137	7.07189e-136	0	FALSE	0.113725	4.80042	7.91685e-07	1.55664e-05	0.0608958	2.63373	0.00422266	0.0768573
CYGB	0.839629	24.8621	9.55849e-137	4.59721e-135	0.847247	FALSE	0.462234	12.7094	2.62097e-37	1.33588e-35	0.302248	8.26639	6.90381e-17	3.44716e-15
CCK	0.658822	24.8056	3.89821e-136	1.86118e-134	0	FALSE	0.117226	4.98319	3.12716e-07	6.44583e-06	0.054711	2.38457	0.00854948	0.139341
GNA14	0.895465	23.9855	1.9705e-127	9.09815e-126	0.806819	FALSE	0.177349	4.31023	8.15431e-06	0.000146666	0.746034	18.2055	2.33319e-74	3.11457e-72
ANKRD33B	0.851069	23.7498	5.51929e-125	2.53049e-123	0.485598	FALSE	0.153341	3.8178	6.73222e-05	0.00110921	0.188703	4.70616	1.26213e-06	3.81027e-05
LPAR3	0.888839	23.1932	2.66881e-119	1.20669e-117	0.743029	FALSE	0.0669845	1.55907	0.05949	0.497983	0.771199	18.1048	1.46131e-73	1.93752e-71
DNM3	0.885255	22.8709	4.52789e-116	2.0102e-114	0.635834	FALSE	0.210584	4.86568	5.70325e-07	1.13619e-05	0.0749885	1.73551	0.0413256	0.50035
SDPR	0.855131	22.3313	9.17381e-111	3.95643e-109	0	FALSE	0.0491372	1.13995	0.127155	0.497983	0.732383	17.1858	1.69574e-66	2.10605e-64
HOXA1	0.912039	22.1206	1.00143e-108	4.25346e-107	0.695685	FALSE	0.562828	12.5346	2.4137e-36	1.20519e-34	0.0478178	1.06396	0.143673	0.50035
NHLH2	0.635302	21.922	8.0215e-107	3.3562e-105	0	FALSE	0.103568	4.1586	1.60101e-05	0.000280505	0.0311892	1.27452	0.101239	0.50035
GFRA2	0.868204	21.5577	2.24326e-103	9.24778e-102	0.854328	FALSE	0.0638686	1.40981	0.0792973	0.497983	0.563348	12.5608	1.73414e-36	1.45423e-34
NEUROD4	0.616125	21.008	2.77264e-98	1.10585e-96	0	FALSE	0.10182	4.08978	2.15894e-05	0.000372618	0.0453497	1.84406	0.0325872	0.418938
3930402G23RIK	0.863511	20.9779	5.2207e-98	2.0738e-96	0.745946	FALSE	0.134638	2.91341	0.00178751	0.0237323	0.788633	17.1459	3.37143e-66	4.16085e-64
CARTPT	0.698567	20.7337	8.59314e-96	3.37922e-94	0	FALSE	0.164371	5.44524	2.58671e-08	5.70967e-07	0.103964	3.53543	0.000203556	0.00473828
AHNAK	0.860155	20.6762	2.83911e-95	1.11201e-93	0.848246	FALSE	0.326245	7.16133	3.99477e-13	1.13773e-11	0.0931666	2.04324	0.0205144	0.290863
KCNH3	0.866504	20.3229	4.03308e-92	1.54875e-90	0	FALSE	0.200303	4.13598	1.76725e-05	0.000308529	0.0212478	0.440136	0.329919	0.50035
ALDH1A1	0.856843	20.1427	1.55872e-90	5.88206e-89	0.508589	FALSE	0.0922859	2.00261	0.0226095	0.22893	0.810499	17.5383	3.65308e-69	4.65483e-67
DACT2	0.911397	19.9777	4.30422e-89	1.60879e-87	0.975742	FALSE	0.760275	15.4251	5.54841e-54	3.42378e-52	0.0698573	1.41692	0.0782527	0.50035
CACNA1H	0.891547	19.8799	3.03756e-88	1.1289e-86	0.765821	FALSE	0.0836922	1.678	0.0466733	0.416305	0.803618	16.2386	1.34389e-59	1.56972e-57
RASSF4	0.823565	19.8652	4.06861e-88	1.50923e-86	0.875393	FALSE	0.15599	3.641	0.00013579	0.0021215	0.440175	10.3749	1.61305e-25	1.09148e-23
DLL4	0.668205	19.3963	4.14868e-84	1.51883e-82	0	FALSE	0.116065	3.83008	6.40507e-05	0.00105708	0.0505303	1.71653	0.0430326	0.50035
MYOF	0.870559	19.3737	6.43183e-84	2.34159e-82	0.520595	FALSE	0.267571	5.30436	5.65341e-08	1.22854e-06	0.0473025	0.939867	0.173643	0.50035
PCDH15	0.816222	19.3708	6.80454e-84	2.4727e-82	0.845859	FALSE	0.52852	11.5414	4.07975e-31	1.86613e-29	0.0586007	1.28114	0.100073	0.50035
DDN	0.86746	19.3184	1.88094e-83	6.78486e-82	0.963172	FALSE	0.657358	13.5395	4.56807e-42	2.5109e-40	0.308164	6.34366	1.12186e-10	4.4339e-09
ARID3C	0.888245	19.2225	1.19856e-82	4.28404e-81	0.995041	FALSE	0.437543	8.57683	4.87623e-18	1.62732e-16	0.0947047	1.8565	0.0316909	0.409125
CTXN3	0.877659	19.1352	6.43182e-82	2.28231e-80	0.907882	FALSE	0.645324	12.8718	3.24444e-38	1.68428e-36	0.0586575	1.17294	0.120409	0.50035
ADAMTS17	0.856083	18.7307	1.39243e-78	4.87053e-77	0.691927	FALSE	0.0943198	1.86629	0.0310007	0.29718	0.803568	15.918	2.37806e-57	2.63642e-55
CTXN2	0.883124	18.5161	7.65056e-77	2.63843e-75	0	FALSE	0.0570646	1.05999	0.144574	0.497983	0.763763	14.3893	3.01829e-47	2.91763e-45
APCDD1	0.821362	18.3096	3.47036e-75	1.18433e-73	0.949324	FALSE	0.65915	13.4479	1.58388e-41	8.58578e-40	0.341633	6.97288	1.55254e-12	6.63734e-11
WNT10A	0.639548	18.0905	1.89286e-73	6.38205e-72	0	FALSE	0.118383	3.8246	6.54935e-05	0.00107998	0.0490529	1.62069	0.0525416	0.50035
FIBCD1	0.871951	18.0032	9.18879e-73	3.09282e-71	0.488459	FALSE	0.37794	7.4951	3.3125e-14	9.81892e-13	0.0337263	0.662639	0.253781	0.50035
GM26894	0.853091	17.868	1.04746e-71	3.51355e-70	0	FALSE	0.0652506	1.23777	0.1079	0.497983	0.797264	15.1652	3.00784e-52	3.19043e-50
VSIR	0.81216	17.7738	5.63705e-71	1.87803e-69	0	FALSE	0.0570888	1.11866	0.131643	0.497983	0.727888	14.4054	2.39298e-47	2.33619e-45
TEKT4	0.888862	17.6796	3.01173e-70	9.99985e-69	0	FALSE	0.0668455	1.19847	0.115367	0.497983	0.800365	14.4624	1.04743e-47	1.05404e-45
ROBO3	0.847093	17.5586	2.55739e-69	8.44843e-68	0.815311	FALSE	0.534775	10.345	2.20564e-25	8.86911e-24	0.053824	1.04314	0.148441	0.50035
B130046B21RIK	0.832887	17.4421	1.97723e-68	6.49903e-67	0.911012	FALSE	0.630504	11.9954	1.87737e-33	8.83444e-32	0.300136	5.70569	5.79362e-09	2.06331e-07
MIR124A-1HG	0.688234	17.2667	4.18662e-67	1.35792e-65	0	FALSE	0.136222	3.80678	7.03949e-05	0.00115113	0.130464	3.6979	0.000108697	0.00263979
GRIFIN	0.874936	17.1081	6.46212e-66	2.08906e-64	0	FALSE	0.222431	4.04753	2.588e-05	0.000441602	0.0138644	0.250752	0.401003	0.50035
CLVS1	0.625459	17.1025	7.11158e-66	2.29524e-64	0	FALSE	0.107713	3.40894	0.000326081	0.00484016	0.0342011	1.10079	0.135495	0.50035
SLCO1C1	0.863107	17.0687	1.26869e-65	4.08793e-64	0	FALSE	0.0960502	1.71601	0.0430801	0.390828	0.79436	14.2372	2.69212e-46	2.53978e-44
CALCRL	0.866325	16.8418	6.02556e-64	1.92573e-62	0.749686	FALSE	0.0474202	0.837871	0.201052	0.497983	0.780766	13.8968	3.31365e-44	3.06716e-42
ESRP1	0.804545	16.6402	1.78333e-62	5.66249e-61	0.77224	FALSE	0.358411	7.22362	2.53117e-13	7.26157e-12	0.039494	0.800637	0.211671	0.50035
TFF3	0.641219	16.4978	1.90117e-61	5.97865e-60	0	FALSE	0.1353	4.00926	3.04546e-05	0.000515626	0.0386274	1.16726	0.121552	0.50035
CRYAB	0.851447	16.3033	4.67837e-60	1.4572e-58	0.294731	FALSE	0.0617937	1.04131	0.148866	0.497983	0.751313	12.7542	1.47693e-37	1.26558e-35
CXCL5	0.882921	16.2031	2.39805e-59	7.42223e-58	0.780186	FALSE	0.29554	4.83507	6.65494e-07	1.31643e-05	0.0305704	0.500293	0.308435	0.50035
GRHL3	0.730447	15.9747	9.58665e-58	2.9211e-56	0.67214	FALSE	0.267958	6.10873	5.02131e-10	1.25201e-08	0.0210604	0.484355	0.314067	0.50035
NHLH1	0.630752	15.7778	2.21324e-56	6.69189e-55	0	FALSE	0.107414	3.14606	0.00082743	0.0115976	0.0334036	0.992194	0.160551	0.50035
TNFAIP8L3	0.84153	15.6396	1.95664e-55	5.86186e-54	0.437344	FALSE	0.0534731	0.885321	0.187992	0.497983	0.800006	13.3095	1.01901e-40	9.13063e-39
1810010H24RIK	0.879646	15.5911	4.18188e-55	1.24523e-53	0.690644	FALSE	0.0687283	1.09188	0.137442	0.497983	0.753718	12.0669	7.89805e-34	6.35178e-32
VGF	0.860172	15.1842	2.24876e-52	6.5374e-51	0	FALSE	0.165811	2.59301	0.00475704	0.058088	0.0197783	0.309869	0.37833	0.50035
1700019B21RIK	0.868352	15.0454	1.84984e-51	5.31471e-50	0	FALSE	0.0582353	0.892256	0.186128	0.497983	0.758441	11.7153	5.32192e-32	4.11149e-30
WFDC1	0.732503	15.0272	2.43715e-51	6.99183e-50	0.890172	FALSE	0.363622	6.91875	2.27816e-12	6.30527e-11	0.448096	8.58874	4.39647e-18	2.32539e-16
SV2C	0.814754	14.9912	4.19239e-51	1.19923e-49	0.792999	FALSE	0.57533	9.82165	4.5421e-23	1.71403e-21	0.0358501	0.610063	0.27091	0.50035
SLC38A11	0.809214	14.7971	7.64543e-50	2.1463e-48	0.910028	FALSE	0.46509	7.99098	6.69362e-16	2.0849e-14	0.511343	8.80899	6.31408e-19	3.47062e-17
NPPC	0.875788	14.7846	9.2014e-50	2.57574e-48	0.837473	FALSE	0.592258	9.3412	4.76249e-21	1.72108e-19	0.125834	1.9749	0.0241395	0.330558
TCTEX1D1	0.872969	14.781	9.71873e-50	2.71668e-48	0.907862	FALSE	0.473527	7.31134	1.32244e-13	3.8388e-12	0.037724	0.583289	0.279849	0.50035
PPP2R2B	0.853617	14.6364	8.22467e-49	2.27314e-47	0.916844	FALSE	0.118637	1.82102	0.0343016	0.323295	0.580721	8.98581	1.28419e-19	7.36834e-18
PRDM1	0.758627	14.5322	3.78478e-48	1.0431e-46	0.9204	FALSE	0.201719	3.69033	0.000111981	0.00177783	0.119679	2.1938	0.014125	0.214896
WNT16	0.865221	14.2567	2.03669e-46	5.50495e-45	0.786218	FALSE	0.289792	4.35462	6.66497e-06	0.000120875	0.331653	5.00917	2.73331e-07	8.67893e-06
RAB37	0.850794	14.2022	4.43788e-46	1.19457e-44	0	FALSE	0.0564891	0.85728	0.195645	0.497983	0.769196	11.7503	3.51904e-32	2.75116e-30
HECW2	0.855505	13.9208	2.36697e-44	6.21781e-43	0.653056	FALSE	0.0972293	1.41908	0.0779382	0.497983	0.802435	11.7423	3.86917e-32	3.01288e-30
EPHX2	0.871082	13.9024	3.06297e-44	8.02466e-43	0.906299	FALSE	0.100185	1.46289	0.0717493	0.497983	0.739455	10.9081	5.26991e-28	3.74679e-26
CRYGB	0.83912	13.8156	1.02684e-43	2.66883e-42	0.723457	FALSE	0.322152	5.01301	2.67926e-07	5.5694e-06	0.279359	4.37904	5.96016e-06	0.000167559
RP23-291B1.2	0.86666	13.7939	1.38718e-43	3.60062e-42	0.536577	FALSE	0.0817513	1.18047	0.118907	0.497983	0.807907	11.7248	4.7567e-32	3.68936e-30
IL1RAPL1	0.826811	13.761	2.1865e-43	5.64548e-42	0.81834	FALSE	0.0395717	0.594851	0.275971	0.497983	0.672867	10.2235	7.78039e-25	5.15792e-23
GM973	0.869325	13.4499	1.54175e-41	3.89366e-40	0.436102	FALSE	0.093398	1.30376	0.0961577	0.497983	0.794724	11.1524	3.48462e-29	2.57063e-27
EGFR	0.805179	13.42	2.30812e-41	5.80669e-40	0.919177	FALSE	0.612147	9.51524	9.06513e-22	3.33743e-20	0.242186	3.7601	8.49236e-05	0.00209617
MCTP1	0.841641	13.2289	2.98701e-40	7.36357e-39	0.616286	FALSE	0.492737	7.23192	2.38114e-13	6.85119e-12	0.335747	4.89943	4.80577e-07	1.48744e-05
CLDN11	0.877671	13.1616	7.30212e-40	1.79112e-38	0.585592	FALSE	0.0992564	1.35471	0.087755	0.497983	0.669817	9.21039	1.62473e-20	9.66124e-19
FFAR4	0.881055	13.0457	3.36191e-39	8.1748e-38	0.53313	FALSE	0.222032	2.958	0.00154819	0.0208799	0.763697	10.2393	6.60847e-25	4.39587e-23
SCN5A	0.888298	12.985	7.44138e-39	1.80274e-37	0.829452	FALSE	0.854698	11.7128	5.47775e-32	2.54715e-30	0.0357376	0.490008	0.312064	0.50035
KYNU	0.84328	12.9722	8.79005e-39	2.12685e-37	0.853193	FALSE	0.481467	6.83021	4.2395e-12	1.16028e-10	0.362284	5.1192	1.53418e-07	4.96785e-06
RPRML	0.867475	12.8876	2.64445e-38	6.37494e-37	0.548834	FALSE	0.342173	4.60357	2.0765e-06	3.96374e-05	0.0262784	0.353484	0.361863	0.50035
NPY5R	0.876249	12.8785	2.97252e-38	7.14825e-37	0.842334	FALSE	0.4634	6.28516	1.63762e-10	4.17337e-09	0.0529115	0.715547	0.237135	0.50035
ARC	0.860021	12.7387	1.80171e-37	4.29066e-36	0.811508	FALSE	0.144303	1.92275	0.0272559	0.268136	0.473874	6.3435	1.12299e-10	4.4339e-09
FGF14	0.850535	12.7321	1.96145e-37	4.6654e-36	0.982479	FALSE	0.261197	3.52561	0.000211257	0.00320116	0.649163	8.81469	6.00085e-19	3.30771e-17
FGFR4	0.886516	12.7102	2.59473e-37	6.14932e-36	0	FALSE	0.194243	2.50182	0.00617785	0.0732938	0.0146071	0.188577	0.425212	0.50035
RP1	0.845211	12.6907	3.33114e-37	7.88503e-36	0	FALSE	0.0514966	0.679427	0.248434	0.497983	0.746556	9.94943	1.26815e-23	8.24001e-22
LGALS7	0.873691	12.654	5.3149e-37	1.25354e-35	0.534268	FALSE	0.456182	6.24009	2.18658e-10	5.55075e-09	0.0269819	0.367384	0.356666	0.50035
GM29811	0.863724	12.5528	1.91825e-36	4.47583e-35	0	FALSE	0.342275	4.46546	3.99484e-06	7.37029e-05	0.0321108	0.420123	0.337198	0.50035
PDGFC	0.839561	12.537	2.34101e-36	5.45578e-35	0.806377	FALSE	0.0902556	1.21116	0.112918	0.497983	0.779285	10.4811	5.27299e-26	3.59277e-24
FOXF1	0.837808	12.5235	2.77688e-36	6.46391e-35	0	FALSE	0.498515	6.9595	1.70741e-12	4.77272e-11	0.0290947	0.404414	0.342954	0.50035
CHGB	0.847289	12.4619	6.02398e-36	1.39397e-34	0.48553	FALSE	0.0656205	0.85739	0.195615	0.497983	0.731962	9.60398	3.84569e-22	2.3881e-20
A4GALT	0.872557	12.3927	1.43034e-35	3.29044e-34	0.561841	FALSE	0.0349666	0.447619	0.327214	0.497983	0.770325	9.87591	2.6475e-23	1.70334e-21
TMEFF2	0.844655	12.3657	2.00443e-35	4.60034e-34	0.428804	FALSE	0.0408349	0.536801	0.295703	0.497983	0.744481	9.81821	4.69971e-23	2.98454e-21
IRX4	0.798959	12.256	7.80249e-35	1.78033e-33	0.94048	FALSE	0.450083	6.89458	2.70113e-12	7.45489e-11	0.0717183	1.09986	0.135696	0.50035
FGF5	0.744991	12.2496	8.44409e-35	1.92449e-33	0.607878	FALSE	0.332173	5.50337	1.86295e-08	4.16364e-07	0.0235104	0.392246	0.347438	0.50035
LAMP5	0.845153	12.2015	1.52495e-34	3.47147e-33	0.599889	FALSE	0.440653	5.8259	2.84025e-09	6.76386e-08	0.345205	4.53594	2.86732e-06	8.41016e-05
ANO3	0.834462	12.0587	8.72727e-34	1.96394e-32	0.776033	FALSE	0.0941966	1.233	0.108789	0.497983	0.783055	10.2879	3.99693e-25	2.66774e-23
SLC27A2	0.820825	11.9917	1.96388e-33	4.38421e-32	0.84614	FALSE	0.323165	4.48225	3.69305e-06	6.83024e-05	0.155319	2.16307	0.015268	0.228965
ENPEP	0.778932	11.9351	3.88557e-33	8.65454e-32	0	FALSE	0.171556	2.33287	0.00982747	0.110766	0.014085	0.191286	0.424151	0.50035
WNT6	0.705554	11.9103	5.23061e-33	1.1624e-31	0.519082	FALSE	0.126708	2.31307	0.0103595	0.115838	0.0775072	1.42774	0.0766826	0.50035
TLE2	0.859015	11.8365	1.26329e-32	2.80425e-31	0.979168	FALSE	0.520493	6.63213	1.65436e-11	4.3929e-10	0.371459	4.74741	1.03019e-06	3.11967e-05
MARCH1	0.792671	11.7316	4.38894e-32	9.59066e-31	0.888713	FALSE	0.226585	3.40598	0.000329632	0.00488548	0.0865331	1.28928	0.0986497	0.50035
MOBP	0.888899	11.7133	5.44455e-32	1.18578e-30	0.659169	FALSE	0.600573	7.38307	7.73382e-14	2.27187e-12	0.109612	1.34867	0.088722	0.50035
MATN2	0.878951	11.6966	6.6353e-32	1.44032e-30	0.969332	FALSE	0.654889	8.03591	4.64421e-16	1.46517e-14	0.355921	4.3575	6.57787e-06	0.000184133
GM20554	0.852458	11.679	8.15904e-32	1.76716e-30	0.901648	FALSE	0.651081	8.36168	3.09145e-17	1.00603e-15	0.0546003	0.698924	0.2423	0.50035
AFAP1L2	0.883529	11.6195	1.63987e-31	3.54396e-30	0.478924	FALSE	0.0864655	1.02858	0.151839	0.497983	0.765076	9.14749	2.91345e-20	1.7117e-18
EBF3	0.677532	11.6003	2.05293e-31	4.43175e-30	0.839926	FALSE	0.166634	3.2183	0.000644767	0.00921505	0.0742022	1.46182	0.0718951	0.50035
SMPDL3A	0.863272	11.5869	2.39974e-31	5.17473e-30	0.706567	FALSE	0.190661	2.3251	0.0100334	0.112634	0.679243	8.33687	3.81409e-17	1.93896e-15
MEGF10	0.833911	11.5153	5.52459e-31	1.18221e-29	0.644219	FALSE	0.0229846	0.285019	0.387815	0.497983	0.693432	8.70302	1.61576e-18	8.83179e-17
AKR1C18	0.861003	11.4885	7.53414e-31	1.61048e-29	0	FALSE	0.190278	2.22736	0.0129615	0.140833	0.017931	0.211148	0.416386	0.50035
OSBPL5	0.866411	11.4686	9.49035e-31	2.02643e-29	0.88073	FALSE	0.0556945	0.665034	0.253014	0.497983	0.749195	8.98771	1.26217e-19	7.26324e-18
NEUROD1	0.670703	11.4239	1.58765e-30	3.37902e-29	0	FALSE	0.162369	3.04076	0.0011799	0.0162593	0.035462	0.675399	0.249711	0.50035
TGFB3	0.824371	11.4048	1.97926e-30	4.19881e-29	0.584082	FALSE	0.0797902	1.00608	0.157189	0.497983	0.782038	9.8483	3.48576e-23	2.22446e-21
GM1000	0.827655	11.3963	2.1825e-30	4.62496e-29	0	FALSE	0.0842172	1.08156	0.139724	0.497983	0.646533	8.37677	2.72009e-17	1.39001e-15
A230065H16RIK	0.889259	11.3753	2.77595e-30	5.8762e-29	0.738041	FALSE	0.466289	5.54622	1.45958e-08	3.30349e-07	0.0259358	0.307883	0.379086	0.50035
TM4SF1	0.816215	11.3463	3.86914e-30	8.14637e-29	0	FALSE	0.0663621	0.808985	0.209262	0.497983	0.739254	9.05756	6.66977e-20	3.8837e-18
GALR1	0.837466	11.2986	6.66483e-30	1.39876e-28	0	FALSE	0.047948	0.586511	0.278766	0.497983	0.666518	8.24458	8.28729e-17	4.117e-15
STK32A	0.839681	11.1715	2.80958e-29	5.8527e-28	0.597381	FALSE	0.0597717	0.711671	0.238334	0.497983	0.727616	8.70198	1.63071e-18	8.88874e-17
SYN2	0.834604	11.1598	3.20535e-29	6.67004e-28	0.557714	FALSE	0.0848103	1.00194	0.158187	0.497983	0.726516	8.6973	1.69936e-18	9.21174e-17
ITGA2B	0.871756	11.1017	6.15456e-29	1.278e-27	0.577031	FALSE	0.479457	5.57946	1.20634e-08	2.74936e-07	0.0331894	0.385779	0.34983	0.50035
WNT9A	0.776443	11.0424	1.19319e-28	2.46982e-27	0.754164	FALSE	0.319677	4.53353	2.90034e-06	5.43067e-05	0.432091	6.12436	4.55248e-10	1.73463e-08
MEOX1	0.798086	10.8829	6.94993e-28	1.42061e-26	0.329721	FALSE	0.293941	4.11302	1.95262e-05	0.000338782	0.0707295	0.981965	0.163059	0.50035
NPAS1	0.864426	10.8042	1.6438e-27	3.34263e-26	0.773254	FALSE	0.499935	5.80538	3.21099e-09	7.59147e-08	0.0615984	0.716514	0.236837	0.50035
EPHA2	0.820682	10.7792	2.15884e-27	4.38539e-26	0.867701	FALSE	0.40884	5.09746	1.72124e-07	3.63965e-06	0.0268319	0.333856	0.369244	0.50035
PLK3	0.672262	10.7255	3.86252e-27	7.8219e-26	0.878023	FALSE	0.181348	3.19479	0.000699675	0.00994187	0.094154	1.6925	0.0452754	0.50035
PDE1A	0.836863	10.6769	6.52926e-27	1.31006e-25	0.878277	FALSE	0.554841	6.56678	2.57082e-11	6.74427e-10	0.128785	1.52666	0.0634225	0.50035
AKR1C13	0.880881	10.6605	7.78821e-27	1.56106e-25	0	FALSE	0.286149	3.22257	0.00063524	0.00909877	0.0100291	0.112777	0.455104	0.50035
FLT1	0.791218	10.6128	1.29923e-26	2.59621e-25	0.783296	FALSE	0.219312	2.96398	0.00151843	0.0205207	0.0292309	0.39189	0.34757	0.50035
CRYBA1	0.881122	10.5951	1.56942e-26	3.12024e-25	0.984241	FALSE	0.797154	9.00918	1.038e-19	3.63077e-18	0.112026	1.26806	0.102388	0.50035
KCNA2	0.760915	10.5663	2.13503e-26	4.23188e-25	0.871437	FALSE	0.555368	7.26271	1.897e-13	5.48232e-12	0.216278	2.81787	0.00241713	0.0467304
GM9930	0.774092	10.5348	2.98611e-26	5.88317e-25	0.810044	FALSE	0.563216	7.17446	3.62958e-13	1.03522e-11	0.35371	4.50895	3.25753e-06	9.45598e-05
ENO4	0.851904	10.5329	3.04665e-26	5.99643e-25	0.870143	FALSE	0.568957	6.71015	9.72147e-12	2.6168e-10	0.0394401	0.466676	0.320366	0.50035
COL22A1	0.821405	10.4819	5.23107e-26	1.02444e-24	0.997586	FALSE	0.0757695	0.867114	0.19294	0.497983	0.749219	8.64331	2.73047e-18	1.46393e-16
EMX1	0.867725	10.4661	6.18397e-26	1.20624e-24	0.789825	FALSE	0.625439	7.06034	8.30481e-13	2.35159e-11	0.127473	1.43839	0.0751617	0.50035
HOXD4	0.459384	10.3402	2.31832e-25	4.49086e-24	0	FALSE	0.0946166	2.23449	0.0127253	0.138727	0.00469242	0.108301	0.456878	0.50035
LRRC55	0.853453	10.299	3.55998e-25	6.8893e-24	0.538827	FALSE	0.0803675	0.865616	0.19335	0.497983	0.749948	8.12599	2.21855e-16	1.09383e-14
SEZ6L	0.806023	10.261	5.27905e-25	1.01759e-23	0.796687	FALSE	0.674302	7.99933	6.2548e-16	1.95443e-14	0.0932852	1.10973	0.133558	0.50035
FIBIN	0.711295	10.2341	6.97534e-25	1.34325e-23	0.677255	FALSE	0.398618	5.48025	2.12359e-08	4.72463e-07	0.208486	2.85539	0.00214918	0.0422578
FGD3	0.82548	10.1793	1.22618e-24	2.35203e-23	0.686291	FALSE	0.0609274	0.678655	0.248678	0.497983	0.738897	8.28799	5.75906e-17	2.89769e-15
SST	0.791342	10.0753	3.55152e-24	6.75305e-23	0	FALSE	0.437812	5.21272	9.30446e-08	1.9998e-06	0.0258294	0.305415	0.380025	0.50035
TMEM255A	0.830933	10.015	6.54519e-24	1.23854e-22	0.922918	FALSE	0.65871	7.38679	7.52078e-14	2.2126e-12	0.144031	1.61473	0.0531845	0.50035
LRP1	0.7234	9.99704	7.85102e-24	1.48278e-22	2.07312	FALSE	0.100169	1.27531	0.101101	0.497983	0.468294	5.98722	1.06731e-09	4.01221e-08
KIF26B	0.81893	9.97897	9.42056e-24	1.7775e-22	0.82052	FALSE	0.0435568	0.480319	0.3155	0.497983	0.636834	7.09464	6.48462e-13	2.8595e-11
CASQ2	0.873608	9.94561	1.31777e-23	2.48402e-22	0	FALSE	0.0511451	0.517906	0.302262	0.497983	0.800821	8.20935	1.11194e-16	5.50999e-15
APP	0.776167	9.94107	1.37928e-23	2.59746e-22	2.15974	FALSE	0.318262	3.76192	8.43084e-05	0.00136275	0.342926	4.06558	2.39563e-05	0.00062763
PLPP3	0.810585	9.93902	1.40797e-23	2.64896e-22	1.9511	FALSE	0.590114	6.71216	9.58817e-12	2.58802e-10	0.0896134	1.01879	0.154152	0.50035
KCNE1	0.804992	9.93743	1.43058e-23	2.68892e-22	0.884413	FALSE	0.538138	6.45621	5.368e-11	1.39703e-09	0.040776	0.487798	0.312846	0.50035
SLMO1	0.851032	9.91547	1.78279e-23	3.34772e-22	1.70233	FALSE	0.556828	6.04905	7.28499e-10	1.78915e-08	0.277414	3.01721	0.00127557	0.0260734
GM26700	0.759949	9.9122	1.84223e-23	3.45603e-22	1.37962	FALSE	0.491586	6.00831	9.37351e-10	2.28777e-08	0.236782	2.89594	0.00189015	0.0376171
GM3764	0.799832	9.90194	2.04131e-23	3.82584e-22	0.787609	FALSE	0.500888	5.81938	2.95339e-09	7.00778e-08	0.0520258	0.60548	0.27243	0.50035
ADAMTS9	0.634786	9.90086	2.06345e-23	3.86366e-22	1.71877	FALSE	0.329692	4.83364	6.70298e-07	1.3246e-05	0.105417	1.54646	0.0609971	0.50035
USP29	0.786652	9.88568	2.40158e-23	4.49249e-22	1.3821	FALSE	0.113816	1.3075	0.0955214	0.497983	0.623598	7.2166	2.66516e-13	1.19131e-11
RCAN2	0.874253	9.8791	2.56461e-23	4.79289e-22	0.94227	FALSE	0.439273	4.53118	2.93274e-06	5.48609e-05	0.0365476	0.375687	0.353575	0.50035
FGF10	0.775882	9.86801	2.8646e-23	5.34843e-22	1.2417	FALSE	0.481866	5.64631	8.19628e-09	1.88996e-07	0.238121	2.78777	0.00265358	0.0504077
JAKMIP1	0.840246	9.86434	2.97127e-23	5.54233e-22	0.555487	FALSE	0.147265	1.5425	0.0614761	0.497983	0.732852	7.7173	5.94079e-15	2.77562e-13
PIP5K1B	0.826598	9.82968	4.19404e-23	7.81574e-22	1.20035	FALSE	0.598536	6.70203	1.02771e-11	2.75503e-10	0.0702098	0.787158	0.215595	0.50035
CTGF	0.765245	9.81128	5.03434e-23	9.37276e-22	1.68445	FALSE	0.422923	5.03093	2.4405e-07	5.08927e-06	0.42374	5.04956	2.21417e-07	7.09945e-06
CH25H	0.818635	9.81054	5.0712e-23	9.43244e-22	0	FALSE	0.181876	2.03417	0.0209674	0.215078	0.0201746	0.224699	0.411107	0.50035
RGS10	0.855632	9.79734	5.77963e-23	1.07399e-21	1.43493	FALSE	0.808489	8.64421	2.70887e-18	9.13335e-17	0.0761459	0.814452	0.207693	0.50035
COL9A1	0.862417	9.75422	8.84782e-23	1.64258e-21	1.07699	FALSE	0.353456	3.65559	0.000128295	0.00201564	0.348927	3.62023	0.000147173	0.00349634
GPR153	0.714487	9.73925	1.02528e-22	1.90161e-21	1.35728	FALSE	0.465502	5.86066	2.30522e-09	5.50979e-08	0.156567	1.97161	0.0243273	0.332665
MEST	0.770854	9.72712	1.15518e-22	2.14052e-21	3.66077	FALSE	0.395835	4.72706	1.13898e-06	2.21508e-05	0.149111	1.78204	0.0373712	0.46502
STX3	0.802497	9.71766	1.26768e-22	2.34675e-21	1.54323	FALSE	0.441743	4.95986	3.52721e-07	7.20984e-06	0.305262	3.42344	0.000309173	0.00698952
FAM189A2	0.786276	9.70867	1.38463e-22	2.56085e-21	1.26382	FALSE	0.497558	5.73537	4.86495e-09	1.13244e-07	0.20151	2.32185	0.0101206	0.162517
MT1	0.796279	9.69058	1.65327e-22	3.05481e-21	2.43499	FALSE	0.416976	4.75533	9.90621e-07	1.94002e-05	0.441805	5.03941	2.33479e-07	7.4376e-06
RRAGB	0.629891	9.6892	1.67577e-22	3.09347e-21	2.27944	FALSE	0.318125	4.58236	2.29879e-06	4.35658e-05	0.174731	2.51603	0.00593426	0.102689
PPARGC1A	0.839323	9.68566	1.73488e-22	3.19959e-21	0.908884	FALSE	0.0331375	0.348165	0.363858	0.497983	0.761126	8.04302	4.38262e-16	2.134e-14
MYC	0.798335	9.68404	1.76248e-22	3.24742e-21	2.0432	FALSE	0.064285	0.726097	0.23389	0.497983	0.483868	5.47704	2.16253e-08	7.41876e-07
AQP4	0.809225	9.68068	1.82143e-22	3.3529e-21	0.93893	FALSE	0.496279	5.598	1.08419e-08	2.47672e-07	0.223219	2.52566	0.0057741	0.100626
SLC27A4	0.826985	9.668	2.06177e-22	3.79176e-21	1.25892	FALSE	0.733046	8.02121	5.23529e-16	1.64635e-14	0.0891127	0.97575	0.164594	0.50035
AKAP6	0.730998	9.64676	2.53664e-22	4.66073e-21	1.08022	FALSE	0.117813	1.43826	0.0751801	0.497983	0.573747	7.02022	1.10762e-12	4.756e-11
CAMSAP3	0.68187	9.63801	2.76245e-22	5.07087e-21	1.39817	FALSE	0.62577	8.31491	4.59103e-17	1.48174e-15	0.0384039	0.510542	0.304836	0.50035
CTNNA2	0.779833	9.63571	2.82512e-22	5.18107e-21	1.44431	FALSE	0.199995	2.2987	0.0107611	0.119776	0.417072	4.79403	8.17329e-07	2.49044e-05
URM1	0.809484	9.55054	6.45107e-22	1.18197e-20	1.83378	FALSE	0.738479	8.19256	1.27867e-16	4.07327e-15	0.0376252	0.416952	0.338357	0.50035
ZDHHC2	0.796873	9.53669	7.37288e-22	1.34961e-20	1.57702	FALSE	0.708207	7.96963	7.95745e-16	2.46292e-14	0.0813231	0.916469	0.17971	0.50035
PTCH2	0.810716	9.53031	7.84096e-22	1.43395e-20	1.11321	FALSE	0.0603801	0.683085	0.247276	0.497983	0.697272	7.91401	1.24618e-15	5.97892e-14
SKIDA1	0.73278	9.52808	8.01058e-22	1.46361e-20	2.14447	FALSE	0.440389	5.3434	4.56096e-08	9.94441e-07	0.207485	2.51603	0.00593432	0.102689
VANGL2	0.797493	9.52142	8.54151e-22	1.55916e-20	2.47344	FALSE	0.677867	7.52925	2.55169e-14	7.57517e-13	0.0888916	0.986676	0.161901	0.50035
CFC1	0.76172	9.51867	8.77031e-22	1.59944e-20	0	FALSE	0.0394925	0.447052	0.327419	0.497983	0.644947	7.37556	8.18301e-14	3.70844e-12
CAMK2A	0.748967	9.51819	8.81122e-22	1.60541e-20	1.0954	FALSE	0.542087	6.3284	1.23861e-10	3.18131e-09	0.34998	4.0864	2.19061e-05	0.000580111
PLIN3	0.79454	9.49164	1.13716e-21	2.06999e-20	2.10027	FALSE	0.595976	6.63063	1.67129e-11	4.43186e-10	0.365231	4.06717	2.37934e-05	0.000624842
CSRNP3	0.787525	9.488	1.17752e-21	2.14147e-20	1.30015	FALSE	0.436685	4.91497	4.43987e-07	8.95411e-06	0.33069	3.7249	9.76969e-05	0.00239938
CYSTM1	0.793708	9.46629	1.44979e-21	2.63418e-20	1.60485	FALSE	0.45042	5.05713	2.12803e-07	4.47092e-06	0.224241	2.51423	0.00596457	0.103074
F11R	0.820747	9.45803	1.56905e-21	2.84823e-20	1.44671	FALSE	0.518352	5.66096	7.52632e-09	1.74161e-07	0.233295	2.55773	0.00526791	0.0929606
LYPD6	0.877552	9.45762	1.57514e-21	2.85665e-20	0.660989	FALSE	0.0366736	0.355895	0.36096	0.497983	0.802081	7.82794	2.47959e-15	1.17529e-13
SPAG9	0.786563	9.45291	1.64764e-21	2.98538e-20	2.47686	FALSE	0.654806	7.32967	1.15363e-13	3.35871e-12	0.0544735	0.608765	0.27134	0.50035
ENC1	0.595623	9.44572	1.7649e-21	3.19489e-20	2.01279	FALSE	0.117075	1.78995	0.0367313	0.342413	0.326111	4.99643	2.92011e-07	9.22728e-06
MAP7	0.764269	9.4349	1.95676e-21	3.53893e-20	1.36214	FALSE	0.543015	6.22871	2.35144e-10	5.95384e-09	0.127887	1.47038	0.0707292	0.50035
PCDH18	0.606725	9.43105	2.03008e-21	3.66816e-20	2.04315	FALSE	0.208203	3.07639	0.00104762	0.0145283	0.300336	4.4458	4.37824e-06	0.000125422
KIF5A	0.763324	9.42486	2.15339e-21	3.88739e-20	1.47615	FALSE	0.337558	3.83833	6.19371e-05	0.00102478	0.254767	2.90089	0.00186053	0.0371028
PDGFA	0.776147	9.41211	2.43143e-21	4.38529e-20	2.34831	FALSE	0.349025	3.96475	3.67358e-05	0.000619833	0.127347	1.44752	0.0738762	0.50035
NTRK3	0.653088	9.4054	2.59163e-21	4.66994e-20	1.40592	FALSE	0.246071	3.32158	0.00044755	0.00653929	0.372825	5.04025	2.32457e-07	7.41709e-06
VGLL4	0.838032	9.39341	2.90446e-21	5.22882e-20	1.97384	FALSE	0.421807	4.3612	6.4677e-06	0.000117514	0.368502	3.82328	6.58433e-05	0.00164382
LXN	0.750063	9.37895	3.33178e-21	5.99262e-20	1.30254	FALSE	0.209858	2.39773	0.00824852	0.0950445	0.384603	4.40532	5.28138e-06	0.000149548
RHOU	0.825569	9.37366	3.50293e-21	6.2947e-20	1.815	FALSE	0.61981	6.5953	2.12192e-11	5.59656e-10	0.142932	1.52088	0.0641448	0.50035
ALDOC	0.804593	9.37316	3.51974e-21	6.31911e-20	1.28143	FALSE	0.0423435	0.448811	0.326784	0.497983	0.620178	6.6361	1.61046e-11	6.61129e-10
SPRY4	0.764456	9.37261	3.53801e-21	6.34611e-20	1.14885	FALSE	0.233408	2.75098	0.00297086	0.0378062	0.0625536	0.740025	0.229642	0.50035
2810433D01RIK	0.852768	9.37225	3.55004e-21	6.36187e-20	0	FALSE	0.0725299	0.730548	0.232528	0.497983	0.818693	8.2864	5.83651e-17	2.92915e-15
GFRA3	0.697681	9.37165	3.57052e-21	6.39273e-20	0.425578	FALSE	0.205074	3.00983	0.00130698	0.0178351	0.127946	1.91341	0.0278477	0.371233
CTH	0.807365	9.36833	3.68461e-21	6.59098e-20	1.65116	FALSE	0.529642	5.72588	5.14505e-09	1.19622e-07	0.253178	2.7327	0.00314086	0.0587541
ITM2C	0.812903	9.35848	4.04442e-21	7.22803e-20	2.15253	FALSE	0.149681	1.57122	0.0580663	0.496651	0.65303	6.8897	2.79557e-12	1.18483e-10
GRM4	0.829322	9.34753	4.48603e-21	8.00995e-20	0.874889	FALSE	0.382218	3.88468	5.12314e-05	0.000854132	0.0294817	0.300391	0.38194	0.50035
DSP	0.773368	9.32628	5.48252e-21	9.78031e-20	1.21113	FALSE	0.263689	3.02814	0.00123032	0.0168947	0.243957	2.80942	0.00248153	0.0477403
PNMA2	0.755489	9.32247	5.6829e-21	1.01286e-19	1.52963	FALSE	0.582624	6.70603	9.99941e-12	2.68425e-10	0.0698309	0.806155	0.210077	0.50035
NR2F6	0.818948	9.31896	5.87439e-21	1.04604e-19	2.80988	FALSE	0.50563	5.34741	4.46109e-08	9.73749e-07	0.211386	2.23727	0.0126344	0.195216
PLPPR1	0.858159	9.29067	7.66597e-21	1.36382e-19	1.22908	FALSE	0.55501	5.56834	1.2859e-08	2.92389e-07	0.288872	2.88989	0.00192686	0.0382314
ROR2	0.704765	9.28234	8.29018e-21	1.47353e-19	1.86195	FALSE	0.374891	4.67799	1.44849e-06	2.79761e-05	0.25654	3.20009	0.000686919	0.0145096
ATP1B1	0.828586	9.26823	9.46262e-21	1.68041e-19	1.65692	FALSE	0.579018	6.04983	7.25002e-10	1.7828e-08	0.166055	1.73095	0.0417304	0.50035
RFTN2	0.850698	9.26514	9.7413e-21	1.72833e-19	0.645965	FALSE	0.0609042	0.602329	0.273478	0.497983	0.7459	7.41642	6.01626e-14	2.74551e-12
IL17D	0.860766	9.26348	9.89364e-21	1.75378e-19	1.07098	FALSE	0.636601	6.54173	3.04052e-11	7.96583e-10	0.14316	1.47127	0.0706091	0.50035
TDRD7	0.756092	9.25606	1.06055e-20	1.87827e-19	1.31188	FALSE	0.615035	7.12542	5.18817e-13	1.47333e-11	0.102572	1.18937	0.117147	0.50035
ONECUT2	0.698093	9.2464	1.16088e-20	2.0541e-19	1.38941	FALSE	0.28464	3.87737	5.27954e-05	0.000879461	0.0593082	0.816476	0.207114	0.50035
PLPPR3	0.809492	9.21845	1.50718e-20	2.66445e-19	1.32752	FALSE	0.601875	6.42109	6.76509e-11	1.75829e-09	0.18907	2.02098	0.0216411	0.304418
CCND1	0.812455	9.19865	1.81237e-20	3.20108e-19	3.37097	FALSE	0.436662	4.72938	1.12601e-06	2.1942e-05	0.143914	1.55931	0.0594612	0.50035
SKAP1	0.77233	9.18589	2.0407e-20	3.60113e-19	0.816681	FALSE	0.442373	4.99005	3.01819e-07	6.23431e-06	0.509718	5.75985	4.20939e-09	1.51007e-07
COL26A1	0.816375	9.1845	2.06713e-20	3.64451e-19	1.11553	FALSE	0.425662	4.49973	3.40191e-06	6.30366e-05	0.0969474	1.0212	0.153581	0.50035
SLC16A10	0.837681	9.14865	2.8825e-20	5.07749e-19	0.829911	FALSE	0.254416	2.50495	0.00612341	0.072737	0.0227752	0.224295	0.411264	0.50035
EYA1	0.75547	9.14209	3.06287e-20	5.39037e-19	1.389	FALSE	0.209016	2.31359	0.0103451	0.115803	0.370356	4.1245	1.85769e-05	0.00049395
FZD9	0.761502	9.13377	3.30787e-20	5.81634e-19	1.39635	FALSE	0.471049	5.39801	3.36919e-08	7.40355e-07	0.064508	0.738511	0.230102	0.50035
RAPSN	0.827756	9.12472	3.59611e-20	6.3175e-19	1.02063	FALSE	0.37387	3.78612	7.65095e-05	0.00124078	0.128514	1.29986	0.0968237	0.50035
3110039M20RIK	0.787162	9.10807	4.19312e-20	7.35971e-19	0.587514	FALSE	0.50756	5.63205	8.90376e-09	2.04828e-07	0.0364665	0.402725	0.343575	0.50035
SEMA3B	0.846493	9.10562	4.28881e-20	7.52094e-19	0.812601	FALSE	0.0860905	0.825708	0.204485	0.497983	0.738048	7.15457	4.19682e-13	1.86322e-11
GNB4	0.837368	9.10498	4.31403e-20	7.55841e-19	1.85753	FALSE	0.246249	2.46872	0.0067799	0.079523	0.440641	4.42912	4.7309e-06	0.000134738
2610028E06RIK	0.882563	9.10333	4.37999e-20	7.66714e-19	0.907031	FALSE	0.677975	6.46143	5.18576e-11	1.3514e-09	0.0809341	0.772784	0.219825	0.50035
RARG	0.813711	9.1019	4.43816e-20	7.76203e-19	1.37511	FALSE	0.539319	5.61154	1.00266e-08	2.29583e-07	0.208896	2.18109	0.0145882	0.220713
CADPS	0.79566	9.08892	5.00137e-20	8.73926e-19	1.1352	FALSE	0.421421	4.42495	4.82326e-06	8.85376e-05	0.294077	3.0983	0.000973186	0.0202511
PBX3	0.832716	9.08563	5.15498e-20	8.99966e-19	2.47745	FALSE	0.635022	6.53291	3.22527e-11	8.42735e-10	0.164783	1.69446	0.045089	0.50035
FKBP11	0.67088	9.08038	5.41006e-20	9.43658e-19	2.19223	FALSE	0.545182	6.88363	2.91737e-12	8.01786e-11	0.136033	1.7159	0.0430898	0.50035
EMB	0.828745	9.0676	6.08344e-20	1.06017e-18	3.11292	FALSE	0.508982	5.28499	6.28565e-08	1.3614e-06	0.163277	1.69934	0.0446276	0.50035
CDX1	0.761056	9.05593	6.77017e-20	1.1788e-18	0.609824	FALSE	0.368005	4.28155	9.27981e-06	0.000166299	0.112692	1.30503	0.0959408	0.50035
KRT19	0.698022	9.0427	7.64221e-20	1.32946e-18	0.692649	FALSE	0.0342503	0.41865	0.337736	0.497983	0.560037	6.86391	3.34994e-12	1.41672e-10
B4GALT1	0.767945	9.02157	9.2708e-20	1.61135e-18	1.53839	FALSE	0.536117	5.82425	2.86847e-09	6.82278e-08	0.224366	2.43808	0.00738277	0.123822
SEL1L3	0.837078	9.01736	9.63348e-20	1.6729e-18	1.04921	FALSE	0.305064	3.00646	0.00132155	0.0180214	0.465785	4.61737	1.94319e-06	5.79501e-05
TYRO3	0.709225	9.01219	1.00988e-19	1.75215e-18	1.9035	FALSE	0.275449	3.26512	0.000547097	0.00791718	0.35786	4.24681	1.0842e-05	0.000296312
BMP4	0.745778	8.99831	1.14605e-19	1.98665e-18	1.21731	FALSE	0.363106	4.31311	8.04854e-06	0.000145029	0.167404	2.00197	0.0226439	0.314912
PLEKHA2	0.79623	8.99669	1.1631e-19	2.01444e-18	1.07099	FALSE	0.467995	4.90426	4.68892e-07	9.41768e-06	0.3048	3.20517	0.000674924	0.0142716
CTDSPL	0.702902	8.98307	1.31662e-19	2.27832e-18	1.77517	FALSE	0.361544	4.27754	9.44847e-06	0.000169013	0.103551	1.22557	0.11018	0.50035
HBP1	0.819042	8.98291	1.31845e-19	2.27947e-18	1.84019	FALSE	0.142264	1.43794	0.0752261	0.497983	0.597972	6.06291	6.68402e-10	2.53206e-08
HMOX1	0.816386	8.97966	1.35804e-19	2.34585e-18	1.65686	FALSE	0.372469	3.84005	6.1505e-05	0.00101849	0.0690501	0.710423	0.238721	0.50035
CDH4	0.659027	8.95244	1.73854e-19	3.00047e-18	1.58287	FALSE	0.459394	5.80506	3.21717e-09	7.59694e-08	0.102266	1.29346	0.0979263	0.50035
LEF1	0.697505	8.94267	1.89948e-19	3.27535e-18	2.26411	FALSE	0.394376	4.74266	1.05463e-06	2.0592e-05	0.336898	4.05464	2.51058e-05	0.000656869
FAM132A	0.849622	8.93514	2.03336e-19	3.50313e-18	1.43408	FALSE	0.596185	5.81256	3.07622e-09	7.28163e-08	0.0549858	0.536227	0.295901	0.50035
SDC3	0.813619	8.93387	2.05674e-19	3.54029e-18	1.2653	FALSE	0.684734	6.99707	1.30687e-12	3.67402e-11	0.0876621	0.896489	0.184996	0.50035
MAST4	0.541522	8.93346	2.06437e-19	3.55031e-18	2.48381	FALSE	0.358132	5.5741	1.24408e-08	2.83208e-07	0.168272	2.61483	0.00446359	0.0806529
FAT3	0.719312	8.92813	2.16632e-19	3.72239e-18	1.18693	FALSE	0.353166	4.11963	1.89738e-05	0.000329489	0.200447	2.33505	0.00977037	0.15728
SLC25A48	0.86655	8.92756	2.1776e-19	3.73849e-18	0.515683	FALSE	0.620879	5.9775	1.13296e-09	2.7549e-08	0.0394517	0.379268	0.352244	0.50035
PPM1N	0.886491	8.92736	2.18146e-19	3.74186e-18	1.28822	FALSE	0.823446	7.72972	5.38914e-15	1.63448e-13	0.0707569	0.663145	0.253619	0.50035
SMS	0.707094	8.9197	2.33775e-19	4.00643e-18	3.57604	FALSE	0.583179	6.94121	1.94376e-12	5.41796e-11	0.0665559	0.791111	0.21444	0.50035
HMGN3	0.73772	8.91657	2.40469e-19	4.11755e-18	2.58227	FALSE	0.537727	6.05748	6.91347e-10	1.70431e-08	0.127236	1.43194	0.0760804	0.50035
SH3D19	0.741013	8.91374	2.46692e-19	4.22044e-18	1.51756	FALSE	0.515932	5.78063	3.72113e-09	8.74489e-08	0.047048	0.527811	0.298815	0.50035
TUBA1A	0.571738	8.90004	2.7912e-19	4.77106e-18	3.22171	FALSE	0.2977	4.414	5.07384e-06	9.29635e-05	0.234614	3.47896	0.00025168	0.00577628
1700012P22RIK	0.709123	8.8896	3.06653e-19	5.23712e-18	0	FALSE	0.0458655	0.505521	0.306596	0.497983	0.673151	7.51523	2.84049e-14	1.30536e-12
ELAVL3	0.656331	8.88798	3.11137e-19	5.30908e-18	1.44848	FALSE	0.203447	2.93291	0.00167902	0.022398	0.0934414	1.36777	0.0856915	0.50035
N4BP3	0.829886	8.87563	3.47699e-19	5.92779e-18	1.39892	FALSE	0.50808	5.05009	2.20797e-07	4.63391e-06	0.249092	2.48051	0.00655968	0.11164
PRDM12	0.76052	8.86967	3.6682e-19	6.24835e-18	0.855345	FALSE	0.386268	4.28221	9.2522e-06	0.000165956	0.333716	3.70591	0.000105315	0.00257039
YPEL3	0.705648	8.86851	3.70672e-19	6.30849e-18	1.67853	FALSE	0.0911132	1.04718	0.147509	0.497983	0.536909	6.19548	2.90542e-10	1.1201e-08
SERINC5	0.843625	8.86123	3.95679e-19	6.72826e-18	0.927071	FALSE	0.158525	1.53876	0.0619318	0.497983	0.722776	7.05716	8.49712e-13	3.6971e-11
DLG1	0.522019	8.85486	4.18942e-19	7.11765e-18	2.34354	FALSE	0.225344	3.57837	0.000172875	0.00265648	0.208049	3.30749	0.00047068	0.010217
RIC8B	0.708222	8.85056	4.35405e-19	7.39097e-18	1.78797	FALSE	0.42545	4.92937	4.12485e-07	8.3668e-06	0.372711	4.32338	7.68271e-06	0.000213538
TEX16	0.715345	8.83227	5.12883e-19	8.69862e-18	1.0021	FALSE	0.435065	4.95881	3.5463e-07	7.24131e-06	0.268282	3.06164	0.00110064	0.022663
COL8A1	0.799676	8.82626	5.41186e-19	9.17073e-18	0	FALSE	0.0240923	0.237336	0.406198	0.497983	0.703992	7.02621	1.06106e-12	4.56606e-11
4930447C04RIK	0.828968	8.8196	5.74338e-19	9.7241e-18	1.19716	FALSE	0.621522	6.17825	3.24087e-10	8.14284e-09	0.0587712	0.585999	0.278938	0.50035
TSPAN4	0.626936	8.81264	6.11163e-19	1.03387e-17	1.91044	FALSE	0.40748	5.35608	4.25234e-08	9.30252e-07	0.0448928	0.589449	0.27778	0.50035
FRAS1	0.693885	8.80621	6.47227e-19	1.09393e-17	1.58904	FALSE	0.421068	4.94535	3.80034e-07	7.74393e-06	0.0912078	1.0725	0.141748	0.50035
HSD17B11	0.864769	8.76133	9.64759e-19	1.62921e-17	1.02095	FALSE	0.549147	5.16925	1.1752e-07	2.5039e-06	0.116169	1.09445	0.136878	0.50035
MTUS1	0.862749	8.7437	1.12801e-18	1.90327e-17	0.973331	FALSE	0.13514	1.26882	0.102253	0.497983	0.745302	7.01861	1.12043e-12	4.80048e-11
RBMS3	0.67573	8.73089	1.26339e-18	2.12986e-17	1.39699	FALSE	0.471487	5.70322	5.87831e-09	1.36187e-07	0.120982	1.46532	0.0714171	0.50035
GM266	0.882538	8.72392	1.34366e-18	2.26324e-17	1.48081	FALSE	0.73241	6.6916	1.10371e-11	2.95071e-10	0.113094	1.03309	0.150782	0.50035
RAB20	0.871088	8.71442	1.46122e-18	2.45913e-17	0.764491	FALSE	0.0880284	0.803005	0.210986	0.497983	0.752317	6.90052	2.59062e-12	1.10034e-10
TCHP	0.794266	8.70693	1.56104e-18	2.62487e-17	1.98801	FALSE	0.42155	4.24724	1.08208e-05	0.000192684	0.067653	0.680433	0.248115	0.50035
IDH1	0.791869	8.67686	2.03427e-18	3.41767e-17	1.72492	FALSE	0.538962	5.48295	2.09149e-08	4.65849e-07	0.164657	1.67698	0.0467736	0.50035
PLPP1	0.78891	8.67226	2.1182e-18	3.55563e-17	1.47756	FALSE	0.0397979	0.403653	0.343234	0.497983	0.695517	7.07893	7.26345e-13	3.18149e-11
NR4A3	0.74778	8.66975	2.16536e-18	3.63169e-17	1.02971	FALSE	0.476371	5.20969	9.45786e-08	2.02832e-06	0.182135	1.9861	0.0235109	0.322851
MFSD2A	0.805284	8.65916	2.37632e-18	3.98212e-17	1.14352	FALSE	0.650593	6.61382	1.87258e-11	4.95224e-10	0.15542	1.58019	0.0570319	0.50035
ST3GAL6	0.807174	8.64541	2.68067e-18	4.48829e-17	1.33847	FALSE	0.485847	4.96156	3.4964e-07	7.15431e-06	0.446615	4.56679	2.47627e-06	7.30703e-05
MOGAT2	0.699907	8.63028	3.06014e-18	5.11928e-17	1.7797	FALSE	0.519285	5.96712	1.20742e-09	2.92147e-08	0.25343	2.90895	0.00181323	0.0362332
CPNE4	0.803294	8.62412	3.22924e-18	5.39756e-17	0.830844	FALSE	0.628136	6.3212	1.2977e-10	3.32439e-09	0.0653939	0.65914	0.254903	0.50035
LPGAT1	0.811242	8.61188	3.59374e-18	6.0017e-17	1.31151	FALSE	0.774342	7.73107	5.33234e-15	1.61976e-13	0.0542777	0.542513	0.293733	0.50035
SLC5A3	0.617442	8.60957	3.66677e-18	6.11845e-17	1.76624	FALSE	0.379124	4.90769	4.60782e-07	9.26777e-06	0.0727323	0.942459	0.172979	0.50035
PLCB4	0.681957	8.60727	3.74116e-18	6.23729e-17	2.08481	FALSE	0.607842	7.24197	2.21114e-13	6.37139e-12	0.0223386	0.266631	0.394877	0.50035
MFNG	0.725724	8.60259	3.89688e-18	6.49139e-17	1.41855	FALSE	0.25409	3.03631	0.00119748	0.0164783	0.165483	1.99757	0.0228818	0.317321
PON2	0.84986	8.59895	4.0223e-18	6.69462e-17	1.32907	FALSE	0.101531	0.927997	0.176705	0.497983	0.694666	6.39003	8.2924e-11	3.30065e-09
D430019H16RIK	0.845179	8.58308	4.61845e-18	7.68032e-17	1.23532	FALSE	0.169693	1.56774	0.0584712	0.497983	0.709036	6.58157	2.32749e-11	9.45597e-10
S100A6	0.824614	8.57304	5.03943e-18	8.37331e-17	1.67166	FALSE	0.209555	1.98425	0.0236143	0.237392	0.657245	6.25582	1.97717e-10	7.698e-09
PPP1R1A	0.72436	8.56821	5.25537e-18	8.72471e-17	2.21284	FALSE	0.411711	4.53943	2.82038e-06	5.28599e-05	0.349211	3.84892	5.93198e-05	0.00149044
PROM1	0.771626	8.56387	5.45698e-18	9.05176e-17	2.14625	FALSE	0.331069	3.38913	0.00035057	0.00518015	0.389332	3.99244	3.2698e-05	0.000842039
ZMYND11	0.741301	8.56111	5.58907e-18	9.26303e-17	2.55966	FALSE	0.620032	6.69087	1.10922e-11	2.9614e-10	0.214161	2.30325	0.0106323	0.169365
FMN2	0.661796	8.55208	6.04433e-18	1.00091e-16	1.55774	FALSE	0.448285	5.45866	2.39866e-08	5.31252e-07	0.248642	3.0206	0.00126139	0.0258104
PDP1	0.861387	8.53754	6.85559e-18	1.13429e-16	1.09773	FALSE	0.380864	3.42997	0.000301824	0.00450052	0.558669	5.04222	2.30083e-07	7.35328e-06
NR1H5	0.387642	8.53358	7.09407e-18	1.17276e-16	2.60405	FALSE	0.221855	4.6093	2.02011e-06	3.86737e-05	0.149868	3.11806	0.000910236	0.0190017
PLEKHH2	0.709975	8.53219	7.18031e-18	1.18602e-16	1.38568	FALSE	0.173805	1.89694	0.028918	0.280226	0.601333	6.60259	2.02021e-11	8.25887e-10
MTSS1	0.593377	8.52953	7.34745e-18	1.21261e-16	2.1151	FALSE	0.208066	2.79703	0.00257872	0.0333129	0.258124	3.4727	0.000257623	0.005892
PLCE1	0.670039	8.51603	8.25567e-18	1.36135e-16	1.63775	FALSE	0.377305	4.49162	3.53413e-06	6.54248e-05	0.275054	3.27036	0.000537061	0.0115304
CD44	0.746424	8.51271	8.49556e-18	1.39973e-16	1.23388	FALSE	0.45505	4.84386	6.36691e-07	1.262e-05	0.270421	2.88684	0.00194566	0.0384876
LRRC4	0.678569	8.48933	1.03916e-17	1.71069e-16	1.39315	FALSE	0.127992	1.45332	0.0730681	0.497983	0.076347	0.868739	0.192495	0.50035
COCH	0.819895	8.48896	1.04243e-17	1.71463e-16	1.16429	FALSE	0.503094	5.03623	2.37401e-07	4.95587e-06	0.131047	1.3118	0.0947932	0.50035
RBFOX1	0.79907	8.48763	1.05451e-17	1.73305e-16	1.01382	FALSE	0.481482	4.92983	4.11515e-07	8.35937e-06	0.0885085	0.901172	0.183748	0.50035
APBA2	0.824476	8.4672	1.25685e-17	2.06387e-16	1.85738	FALSE	0.687752	6.65661	1.40108e-11	3.72539e-10	0.079981	0.773527	0.219605	0.50035
CDH22	0.809706	8.45919	1.34625e-17	2.20881e-16	0.932711	FALSE	0.596721	5.72289	5.23642e-09	1.21603e-07	0.0822107	0.790686	0.214564	0.50035
SV2B	0.801222	8.45751	1.36575e-17	2.23708e-16	0.743411	FALSE	0.408548	4.04842	2.57826e-05	0.000440323	0.151198	1.50022	0.0667788	0.50035
HPCAL1	0.783988	8.45751	1.36575e-17	2.23708e-16	1.83328	FALSE	0.192817	1.94805	0.0257042	0.255519	0.579922	5.86766	2.21e-09	8.12114e-08
SKAP2	0.890243	8.45481	1.39768e-17	2.28747e-16	1.53252	FALSE	0.675832	5.96629	1.21352e-09	2.93261e-08	0.0759351	0.668831	0.251802	0.50035
IGF2	0.635044	8.44923	1.4662e-17	2.39761e-16	1.46565	FALSE	0.279892	3.48122	0.000249572	0.00375563	0.282803	3.52629	0.000210716	0.00489334
PIPOX	0.848943	8.43923	1.59717e-17	2.6096e-16	1.48048	FALSE	0.287776	2.66127	0.00389236	0.0484028	0.425399	3.94147	4.04923e-05	0.00103596
JAM3	0.851938	8.43114	1.7115e-17	2.79407e-16	2.50943	FALSE	0.558873	5.14076	1.36811e-07	2.90861e-06	0.242825	2.23827	0.0126017	0.194865
METRN	0.685602	8.42649	1.78091e-17	2.90497e-16	2.19276	FALSE	0.348949	4.0248	2.8512e-05	0.000483988	0.203672	2.34774	0.00944388	0.152776
FOXP4	0.716994	8.41106	2.03169e-17	3.31128e-16	1.76182	FALSE	0.499141	5.46013	2.37898e-08	5.27488e-07	0.203354	2.22519	0.0130343	0.201078
ENO2	0.751646	8.40966	2.05594e-17	3.34802e-16	1.16029	FALSE	0.574574	5.889	1.94274e-09	4.65474e-08	0.273572	2.80603	0.00250781	0.0481514
GM38393	0.43598	8.39113	2.40736e-17	3.91705e-16	1.77474	FALSE	0.255794	4.5989	2.1236e-06	4.04577e-05	0.0887715	1.59764	0.0550615	0.50035
DUSP18	0.794552	8.38809	2.47055e-17	4.01654e-16	1.66155	FALSE	0.371013	3.59789	0.000160402	0.00248035	0.129368	1.25421	0.104883	0.50035
BRINP2	0.677452	8.38189	2.60433e-17	4.23053e-16	1.04169	FALSE	0.264755	3.10606	0.000947984	0.0131838	0.289233	3.40225	0.00033417	0.00751997
CPEB1	0.833273	8.36424	3.02517e-17	4.91008e-16	0.524729	FALSE	0.0393414	0.35246	0.362247	0.497983	0.743361	6.69192	1.10128e-11	4.58821e-10
CRHR2	0.821286	8.35674	3.22365e-17	5.22791e-16	0.490129	FALSE	0.253029	2.39626	0.0082816	0.0953362	0.418945	4.00683	3.07691e-05	0.000794449
PDHA1	0.887569	8.35607	3.24212e-17	5.25351e-16	3.07413	FALSE	0.588889	5.12071	1.5219e-07	3.22509e-06	0.27549	2.39458	0.00831959	0.136501
B830012L14RIK	0.726817	8.33362	3.92032e-17	6.34724e-16	1.33272	FALSE	0.669826	7.25191	2.05466e-13	5.92922e-12	0.0415304	0.450575	0.326148	0.50035
SHROOM2	0.804986	8.31182	4.7124e-17	7.62337e-16	1.26835	FALSE	0.655304	6.25675	1.96547e-10	5.00239e-09	0.0969682	0.924092	0.177719	0.50035
SLC36A2	0.824472	8.30996	4.78682e-17	7.73738e-16	0.541463	FALSE	0.0667414	0.602163	0.273533	0.497983	0.744626	6.74024	7.90618e-12	3.30091e-10
GM26652	0.859288	8.30362	5.04943e-17	8.15513e-16	0.946553	FALSE	0.775188	7.03967	9.63489e-13	2.72037e-11	0.0755216	0.686323	0.246255	0.50035
NEFL	0.825554	8.29573	5.39592e-17	8.70758e-16	1.71221	FALSE	0.393565	3.60454	0.000156354	0.00242348	0.070743	0.647232	0.258741	0.50035
GM12688	0.726321	8.29163	5.58543e-17	9.00599e-16	0.578664	FALSE	0.131877	1.51471	0.0649228	0.497983	0.0298131	0.340733	0.366652	0.50035
CD59A	0.801819	8.29051	5.63819e-17	9.08359e-16	1.76566	FALSE	0.429217	4.07815	2.26975e-05	0.000391039	0.518639	4.9505	3.70114e-07	1.16018e-05
FOXJ1	0.837597	8.27479	6.4342e-17	1.03575e-15	0.708843	FALSE	0.382216	3.40095	0.000335759	0.00496877	0.53953	4.82538	6.98686e-07	2.14224e-05
MYL3	0.84673	8.27343	6.50809e-17	1.04679e-15	0.745728	FALSE	0.290289	2.67845	0.00369823	0.0462821	0.365264	3.38604	0.000354548	0.00790601
SLC29A1	0.741261	8.26358	7.06848e-17	1.13599e-15	1.77774	FALSE	0.297636	3.07438	0.00105471	0.0146163	0.241821	2.49813	0.00624251	0.107171
RFTN1	0.781032	8.25793	7.4113e-17	1.19011e-15	1.29886	FALSE	0.483491	4.69374	1.34125e-06	2.59559e-05	0.228322	2.21598	0.0133465	0.205411
SNRPN	0.801513	8.25529	7.57653e-17	1.21565e-15	2.94924	FALSE	0.411986	3.95208	3.8737e-05	0.000651359	0.260368	2.50046	0.00620166	0.10675
ANKRD6	0.698993	8.24388	8.33585e-17	1.33639e-15	1.40623	FALSE	0.294206	3.16058	0.000787283	0.0110903	0.0486378	0.523045	0.300471	0.50035
KLF7	0.705943	8.23533	8.95315e-17	1.43418e-15	1.7853	FALSE	0.14504	1.58514	0.0564674	0.486204	0.410372	4.50495	3.31945e-06	9.6215e-05
FKBP9	0.835587	8.2196	1.02089e-16	1.63401e-15	2.10919	FALSE	0.0568003	0.511143	0.304626	0.497983	0.750602	6.78579	5.7725e-12	2.42556e-10
PEG12	0.555247	8.21903	1.02576e-16	1.64047e-15	2.22869	FALSE	0.438743	6.08905	5.67923e-10	1.40534e-08	0.208043	2.88716	0.00194368	0.0384872
COX6B2	0.872376	8.21646	1.04803e-16	1.67472e-15	1.76955	FALSE	0.570034	4.96714	3.39733e-07	6.97341e-06	0.389817	3.39982	0.000337153	0.00756974
GLIS3	0.743053	8.20414	1.16128e-16	1.85417e-15	1.20014	FALSE	0.110894	1.13486	0.128216	0.497983	0.0276887	0.284067	0.38818	0.50035
NINJ1	0.712335	8.18263	1.38863e-16	2.21537e-15	1.40422	FALSE	0.112021	1.16999	0.121003	0.497983	0.581733	6.09456	5.48708e-10	2.08265e-08
VAMP8	0.729567	8.17025	1.53879e-16	2.45293e-15	1.48716	FALSE	0.222187	2.34354	0.00955097	0.10796	0.250716	2.65251	0.00399475	0.0729199
CTSO	0.858735	8.16754	1.57369e-16	2.50654e-15	0.699906	FALSE	0.0570779	0.486786	0.313205	0.497983	0.775939	6.68275	1.17253e-11	4.87469e-10
HIST1H1B	0.285756	8.16481	1.60975e-16	2.56189e-15	4.10367	FALSE	0.0862783	2.28548	0.0111422	0.123527	0.102462	2.71403	0.00332352	0.0615839
GUCY1B3	0.846979	8.15211	1.78814e-16	2.84349e-15	0.919554	FALSE	0.559117	5.02997	2.45275e-07	5.10937e-06	0.174788	1.57576	0.0575407	0.50035
IGF1	0.812437	8.14213	1.94192e-16	3.08553e-15	0	FALSE	0.0555464	0.497386	0.309458	0.497983	0.689594	6.24378	2.13556e-10	8.26549e-09
LRRN1	0.774735	8.13377	2.0807e-16	3.30337e-15	1.53383	FALSE	0.572557	5.65057	7.99588e-09	1.84809e-07	0.0170893	0.168985	0.432904	0.50035
TMEM263	0.747707	8.13016	2.14356e-16	3.40041e-15	1.95718	FALSE	0.386235	3.84113	6.12349e-05	0.00101487	0.513698	5.11679	1.55391e-07	5.02345e-06
ARHGDIG	0.734807	8.12787	2.18441e-16	3.46242e-15	1.64941	FALSE	0.499576	5.16955	1.1733e-07	2.50256e-06	0.133722	1.38125	0.0836014	0.50035
LHFP	0.845772	8.11176	2.49451e-16	3.95074e-15	1.19256	FALSE	0.619824	5.52547	1.64302e-08	3.7016e-07	0.0658132	0.587141	0.278554	0.50035
FAM19A2	0.677907	8.09965	2.75583e-16	4.3611e-15	0.680866	FALSE	0.398846	4.58669	2.25161e-06	4.27719e-05	0.0338641	0.389711	0.348375	0.50035
AKR1B3	0.658615	8.09923	2.76545e-16	4.3728e-15	3.01381	FALSE	0.363087	4.15638	1.61664e-05	0.000282991	0.180372	2.06796	0.019322	0.276554
MYRF	0.791819	8.08778	3.03801e-16	4.7999e-15	1.12741	FALSE	0.17075	1.62291	0.0523046	0.458202	0.557491	5.31509	5.33022e-08	1.78186e-06
RREB1	0.637312	8.08138	3.20201e-16	5.05496e-15	1.61147	FALSE	0.502656	5.94646	1.37005e-09	3.30276e-08	0.109211	1.292	0.0981788	0.50035
DLX6	0.737277	8.07718	3.31398e-16	5.22752e-15	0.708129	FALSE	0.163935	1.84417	0.0325793	0.310191	0.0654876	0.737973	0.230265	0.50035
COTL1	0.704982	8.07412	3.39819e-16	5.35605e-15	2.23481	FALSE	0.232431	2.48932	0.0063993	0.0754648	0.491122	5.27585	6.60704e-08	2.18266e-06
MT3	0.819866	8.07288	3.43285e-16	5.40632e-15	1.42775	FALSE	0.410944	3.77327	8.05601e-05	0.00130324	0.363122	3.32872	0.000436237	0.00956455
5530401A14RIK	0.82348	8.0651	3.65889e-16	5.7577e-15	0	FALSE	0.0552983	0.490318	0.311954	0.497983	0.716823	6.40161	7.68718e-11	3.06596e-09
KLK8	0.703178	8.06493	3.66378e-16	5.76077e-15	2.26418	FALSE	0.538933	5.77541	3.8383e-09	9.00944e-08	0.115614	1.23798	0.107862	0.50035
PLCL1	0.784313	8.06334	3.71177e-16	5.83155e-15	0.659927	FALSE	0.213784	2.01236	0.0220909	0.224722	0.451739	4.26835	9.84637e-06	0.00027137
PTPN13	0.634501	8.05303	4.03837e-16	6.33959e-15	2.74165	FALSE	0.427627	5.1131	1.58454e-07	3.3542e-06	0.200571	2.39113	0.00839826	0.137448
KIF1A	0.800264	8.04398	4.34844e-16	6.8209e-15	1.64111	FALSE	0.488119	4.54056	2.8053e-06	5.26275e-05	0.0391529	0.364103	0.35789	0.50035
DLL1	0.62705	8.02953	4.89236e-16	7.66795e-15	1.98053	FALSE	0.055393	0.70405	0.240701	0.497983	0.30433	3.89816	4.84629e-05	0.00123185
DPYSL3	0.798387	8.01994	5.28974e-16	8.28416e-15	1.84542	FALSE	0.664175	6.29188	1.56826e-10	4.00703e-09	0.226701	2.14828	0.0158459	0.235921
FAM117A	0.755982	7.98624	6.95566e-16	1.08844e-14	1.44833	FALSE	0.609845	5.97726	1.13459e-09	2.75545e-08	0.0200673	0.196692	0.422034	0.50035
SOX2	0.834548	7.98367	7.10211e-16	1.11048e-14	3.53026	FALSE	0.291328	2.65747	0.00393643	0.04892	0.288748	2.63345	0.00422611	0.0768573
SOCS2	0.771902	7.98027	7.30052e-16	1.14059e-14	2.36837	FALSE	0.557795	5.50904	1.80394e-08	4.04096e-07	0.159365	1.57481	0.0576505	0.50035
SALL2	0.651807	7.97782	7.44673e-16	1.16251e-14	2.74203	FALSE	0.523612	6.09104	5.60913e-10	1.38975e-08	0.0370507	0.431048	0.333217	0.50035
SH3RF1	0.610488	7.94102	1.00259e-15	1.5639e-14	1.89046	FALSE	0.0596466	0.720275	0.235678	0.497983	0.526408	6.37552	9.11718e-11	3.61427e-09
SERPINH1	0.729672	7.90514	1.33811e-15	2.08561e-14	3.38622	FALSE	0.390627	3.92556	4.32649e-05	0.00072625	0.288213	2.90287	0.0018488	0.0369063
FOXP1	0.740669	7.90265	1.36519e-15	2.12612e-14	2.36433	FALSE	0.0359803	0.350907	0.362829	0.497983	0.602	5.89991	1.81853e-09	6.75852e-08
RP23-145I16.5	0.693204	7.89782	1.41907e-15	2.20829e-14	0.8784	FALSE	0.398686	4.51505	3.16504e-06	5.8814e-05	0.256806	2.92412	0.00172715	0.0346543
GRID2	0.803469	7.89718	1.4264e-15	2.21793e-14	0.740739	FALSE	0.595143	5.5807	1.19773e-08	2.73292e-07	0.129337	1.2086	0.113409	0.50035
SERPINA3G	0.739902	7.89138	1.49431e-15	2.32169e-14	0	FALSE	0.0619621	0.626973	0.265339	0.497983	0.659425	6.65768	1.39093e-11	5.73407e-10
PHACTR2	0.775098	7.87592	1.69116e-15	2.62544e-14	1.63553	FALSE	0.456527	4.32657	7.57258e-06	0.000136704	0.149866	1.42337	0.0773146	0.50035
YDJC	0.797874	7.87559	1.69569e-15	2.6304e-14	1.4892	FALSE	0.649492	5.9944	1.02122e-09	2.48627e-08	0.0770213	0.710365	0.238739	0.50035
CDC42EP4	0.77482	7.87463	1.70877e-15	2.6486e-14	1.39331	FALSE	0.653402	6.18151	3.17461e-10	7.9866e-09	0.0786528	0.743959	0.228451	0.50035
ARHGAP10	0.785061	7.87407	1.71639e-15	2.65831e-14	1.56011	FALSE	0.342902	3.23586	0.000606384	0.00871088	0.156107	1.47088	0.0706619	0.50035
S100A11	0.842264	7.86924	1.78404e-15	2.7609e-14	1.19838	FALSE	0.118186	1.00545	0.15734	0.497983	0.683169	5.83768	2.64667e-09	9.63557e-08
TIAM1	0.565892	7.85683	1.96986e-15	3.04606e-14	1.87493	FALSE	0.280767	3.64885	0.000131707	0.00206332	0.179222	2.33144	0.00986504	0.158674
GRIA3	0.654601	7.84432	2.1766e-15	3.36311e-14	1.38084	FALSE	0.447328	4.96189	3.49044e-07	7.14958e-06	0.100566	1.11528	0.132366	0.50035
1700025G04RIK	0.757262	7.84027	2.24782e-15	3.47041e-14	2.19878	FALSE	0.509302	4.98912	3.03275e-07	6.25779e-06	0.0571423	0.559344	0.287963	0.50035
SLC8A3	0.740004	7.83541	2.33661e-15	3.60466e-14	1.1072	FALSE	0.290028	2.79341	0.00260781	0.0336443	0.459665	4.45042	4.28512e-06	0.000122934
DHX32	0.837089	7.83404	2.36217e-15	3.64124e-14	1.79342	FALSE	0.661764	5.75929	4.22331e-09	9.8895e-08	0.276187	2.4006	0.00818414	0.134504
GAL	0.803056	7.82719	2.49445e-15	3.84212e-14	0.635566	FALSE	0.0569619	0.516982	0.302584	0.497983	0.679187	6.2118	2.61902e-10	1.01167e-08
ID3	0.443236	7.82671	2.50398e-15	3.85377e-14	4.82609	FALSE	0.270829	4.51544	3.1592e-06	5.8814e-05	0.201218	3.35264	0.000400227	0.00886417
DDIT4L	0.860241	7.81994	2.64238e-15	4.06359e-14	1.43354	FALSE	0.361984	3.01342	0.00129159	0.0176373	0.366876	3.06186	0.00109984	0.022663
EML5	0.599016	7.81518	2.74429e-15	4.217e-14	1.6049	FALSE	0.414768	5.01202	2.69307e-07	5.58704e-06	0.0823456	0.99761	0.159234	0.50035
ZCCHC7	0.647769	7.80761	2.91409e-15	4.47443e-14	2.53262	FALSE	0.381046	4.27568	9.52786e-06	0.000170278	0.137874	1.54898	0.0606931	0.50035
PROK2	0.867481	7.79884	3.12382e-15	4.79271e-14	0.920097	FALSE	0.740915	6.19268	2.95751e-10	7.44996e-09	0.0718625	0.599708	0.27435	0.50035
ACOT7	0.746673	7.7591	4.27658e-15	6.5562e-14	1.8584	FALSE	0.297817	2.88275	0.00197113	0.0259942	0.325526	3.14796	0.000822075	0.01729
PRR36	0.793971	7.75865	4.29187e-15	6.5745e-14	1.29104	FALSE	0.739574	6.81042	4.86584e-12	1.32799e-10	0.0677927	0.624692	0.266086	0.50035
MMP11	0.839603	7.74559	4.75705e-15	7.2814e-14	1.02043	FALSE	0.225447	1.90626	0.0283085	0.275681	0.602609	5.10704	1.63621e-07	5.28083e-06
A930011G23RIK	0.807017	7.74128	4.92105e-15	7.52656e-14	0.983762	FALSE	0.0757929	0.662801	0.253729	0.497983	0.666764	5.868	2.20548e-09	8.11973e-08
SYT6	0.771551	7.73791	5.05318e-15	7.72263e-14	1.1764	FALSE	0.457191	4.22983	1.16933e-05	0.000207466	0.141667	1.31338	0.0945277	0.50035
SH3PXD2A	0.663915	7.73676	5.09918e-15	7.78687e-14	1.35331	FALSE	0.483993	5.22711	8.60922e-08	1.85443e-06	0.0128133	0.138846	0.444786	0.50035
ERO1LB	0.797085	7.73062	5.35122e-15	8.1654e-14	1.12567	FALSE	0.421976	3.84651	5.99066e-05	0.00099454	0.488608	4.4651	4.00166e-06	0.000115139
FOXD2	0.837876	7.72965	5.39205e-15	8.22131e-14	0	FALSE	0.0553666	0.460358	0.32263	0.497983	0.642407	5.3889	3.54455e-08	1.19715e-06
1700019D03RIK	0.843936	7.72719	5.49743e-15	8.37546e-14	1.06389	FALSE	0.587815	4.96498	3.43544e-07	7.04426e-06	0.226716	1.91349	0.0278428	0.371233
IQGAP2	0.800143	7.72168	5.74015e-15	8.73848e-14	1.83849	FALSE	0.575549	5.22476	8.71889e-08	1.876e-06	0.144865	1.31452	0.0943361	0.50035
1110008P14RIK	0.689692	7.71083	6.25e-15	9.50727e-14	2.02181	FALSE	0.605363	6.34301	1.12658e-10	2.8994e-09	0.0507565	0.53156	0.297516	0.50035
FOXP2	0.800398	7.70944	6.31854e-15	9.60408e-14	0.758099	FALSE	0.0931395	0.812292	0.208312	0.497983	0.672357	5.86368	2.26358e-09	8.30248e-08
COL5A2	0.807668	7.70875	6.35268e-15	9.6485e-14	1.22971	FALSE	0.317031	2.80485	0.00251699	0.0325583	0.465199	4.12592	1.8463e-05	0.000491588
TRPC4	0.770143	7.70383	6.60237e-15	1.002e-13	0.75375	FALSE	0.657667	6.20154	2.79568e-10	7.06043e-09	0.0599166	0.566105	0.285661	0.50035
JUND	0.630518	7.69706	6.96187e-15	1.05574e-13	3.15407	FALSE	0.357393	4.0692	2.35871e-05	0.000405297	0.292206	3.32539	0.00044148	0.00966871
FAM159A	0.824262	7.68766	7.49242e-15	1.13532e-13	0	FALSE	0.0923106	0.791199	0.214414	0.497983	0.760593	6.55888	2.71076e-11	1.09903e-09
JAKMIP2	0.700892	7.65443	9.70859e-15	1.47e-13	1.73635	FALSE	0.551706	5.62512	9.26882e-09	2.12977e-07	0.249828	2.54756	0.00542394	0.0953709
GNG12	0.864164	7.64625	1.0346e-14	1.5653e-13	1.48992	FALSE	0.375085	3.15934	0.000790639	0.0111296	0.0316907	0.266572	0.3949	0.50035
PTPRM	0.634025	7.63244	1.15178e-14	1.74125e-13	0.995155	FALSE	0.303723	3.56907	0.000179122	0.00274818	0.24178	2.84814	0.00219875	0.0430171
IGSF9	0.683694	7.63067	1.16765e-14	1.76389e-13	1.87972	FALSE	0.595267	6.24232	2.1556e-10	5.47919e-09	0.163142	1.70975	0.0436557	0.50035
COL12A1	0.84926	7.62635	1.20751e-14	1.82269e-13	0	FALSE	0.499537	4.10206	2.04747e-05	0.0003543	0.026821	0.220389	0.412784	0.50035
ID4	0.777752	7.62597	1.21102e-14	1.82658e-13	1.4169	FALSE	0.147303	1.3594	0.0870102	0.497983	0.227961	2.11678	0.0171394	0.250991
CD9	0.670122	7.62531	1.21728e-14	1.83462e-13	2.2483	FALSE	0.522707	5.61608	9.76688e-09	2.23897e-07	0.1606	1.72913	0.0418927	0.50035
IER5L	0.571379	7.61954	1.27291e-14	1.91699e-13	2.40641	FALSE	0.205261	2.58479	0.00487188	0.059269	0.26324	3.31977	0.000450461	0.00982155
PON3	0.841491	7.60368	1.43916e-14	2.16569e-13	0.305849	FALSE	0.0694253	0.563662	0.286492	0.497983	0.782534	6.4039	7.57305e-11	3.0266e-09
MME	0.80223	7.59238	1.57041e-14	2.3614e-13	0.892187	FALSE	0.0853651	0.739191	0.229896	0.497983	0.560857	4.8807	5.28547e-07	1.63077e-05
PLD5	0.836424	7.58221	1.69856e-14	2.55213e-13	0.800569	FALSE	0.752582	6.3429	1.12737e-10	2.8994e-09	0.0322275	0.271705	0.392924	0.50035
ZYX	0.812329	7.57442	1.80364e-14	2.70794e-13	1.87934	FALSE	0.561824	4.92386	4.24278e-07	8.58309e-06	0.293106	2.56662	0.00513469	0.0909369
TLE6	0.866097	7.56512	1.93759e-14	2.90682e-13	0.829794	FALSE	0.638765	5.18198	1.09771e-07	2.3439e-06	0.255463	2.07474	0.0190055	0.2729
ETS1	0.757433	7.55618	2.0754e-14	3.11119e-13	0.990557	FALSE	0.105546	0.993165	0.160315	0.497983	0.328038	3.08642	0.00101291	0.021011
SLITRK1	0.74065	7.54359	2.28602e-14	3.42432e-13	0.792402	FALSE	0.488806	4.55941	2.56488e-06	4.8302e-05	0.12427	1.16279	0.122457	0.50035
IGSF11	0.823433	7.53804	2.38552e-14	3.57064e-13	0.966516	FALSE	0.307057	2.55853	0.00525581	0.0634199	0.0738706	0.615371	0.269155	0.50035
1700007G11RIK	0.812706	7.5288	2.56044e-14	3.82954e-13	0.564982	FALSE	0.0528028	0.443242	0.328795	0.497983	0.704061	5.92808	1.53252e-09	5.71722e-08
KDELR3	0.793098	7.51491	2.8475e-14	4.25564e-13	0.969152	FALSE	0.0572509	0.493312	0.310896	0.497983	0.537177	4.65494	1.62035e-06	4.84696e-05
ANXA2	0.798046	7.50883	2.98285e-14	4.45453e-13	1.20673	FALSE	0.122482	1.08017	0.140034	0.497983	0.369106	3.27083	0.000536164	0.0115237
SMARCA1	0.751023	7.50603	3.04738e-14	4.54743e-13	1.96291	FALSE	0.395515	3.67006	0.000121249	0.00191259	0.303515	2.82523	0.00236236	0.0459806
DKK3	0.837122	7.50358	3.10493e-14	4.62979e-13	0.662482	FALSE	0.0395046	0.323495	0.37316	0.497983	0.769562	6.30685	1.42387e-10	5.57697e-09
GFRA1	0.74754	7.49964	3.1996e-14	4.76733e-13	0.751186	FALSE	0.356479	3.29698	0.000488659	0.00711875	0.571766	5.29784	5.85904e-08	1.94538e-06
MRPS6	0.736918	7.4995	3.20316e-14	4.76902e-13	2.53538	FALSE	0.381072	3.5952	0.00016207	0.00250417	0.269956	2.55255	0.00534687	0.0941846
MT2	0.824292	7.48085	3.69226e-14	5.49304e-13	1.5407	FALSE	0.596831	5.01436	2.66054e-07	5.53636e-06	0.0816382	0.68599	0.24636	0.50035
KIZ	0.869832	7.47972	3.72409e-14	5.5362e-13	1.58089	FALSE	0.538709	4.37131	6.17503e-06	0.000112614	0.251875	2.04628	0.0203644	0.289154
PTGIS	0.576011	7.47914	3.74064e-14	5.55659e-13	1.99031	FALSE	0.298956	3.61055	0.000152772	0.00237172	0.177289	2.14082	0.0161441	0.239452
UBE2QL1	0.7644	7.47775	3.7803e-14	5.61126e-13	1.35904	FALSE	0.434935	4.15868	1.60044e-05	0.000280505	0.173473	1.65692	0.0487675	0.50035
PPP3CA	0.747687	7.47499	3.86062e-14	5.72615e-13	2.05413	FALSE	0.593721	5.54008	1.51169e-08	3.41357e-07	0.0982831	0.914269	0.180288	0.50035
TPD52	0.846008	7.46271	4.23815e-14	6.28136e-13	1.89648	FALSE	0.530138	4.38705	5.74505e-06	0.000104967	0.194345	1.60918	0.0537884	0.50035
SRM	0.553322	7.44592	4.81343e-14	7.1286e-13	3.40345	FALSE	0.0383346	0.477024	0.316672	0.497983	0.389457	4.85277	6.0874e-07	1.86937e-05
BCAM	0.750144	7.44347	4.90375e-14	7.25688e-13	1.41531	FALSE	0.44651	4.27831	9.41605e-06	0.000168587	0.237562	2.27313	0.0115092	0.180722
PDE1C	0.730633	7.44308	4.9183e-14	7.27293e-13	1.20405	FALSE	0.0903336	0.831084	0.202963	0.497983	0.585562	5.42113	2.96121e-08	1.00882e-06
PTH2R	0.765245	7.44114	4.9911e-14	7.37503e-13	0.642091	FALSE	0.526141	4.84426	6.35428e-07	1.26077e-05	0.174595	1.60125	0.054661	0.50035
RCN1	0.777118	7.43968	5.04646e-14	7.45122e-13	2.61374	FALSE	0.389508	3.41122	0.000323359	0.00480339	0.0509018	0.446185	0.327732	0.50035
PHYHIPL	0.824579	7.43413	5.26293e-14	7.76499e-13	1.55912	FALSE	0.625529	5.24282	7.90706e-08	1.70693e-06	0.0967726	0.811731	0.208473	0.50035
CTTNBP2	0.802051	7.42805	5.51065e-14	8.12438e-13	1.33409	FALSE	0.279647	2.37644	0.00874025	0.100123	0.0250807	0.213254	0.415564	0.50035
PNRC1	0.729068	7.41952	5.87731e-14	8.65844e-13	2.86308	FALSE	0.0583852	0.552917	0.29016	0.497983	0.520052	4.93409	4.02629e-07	1.25809e-05
5730409E04RIK	0.792686	7.41459	6.1002e-14	8.98006e-13	1.04452	FALSE	0.236919	2.0445	0.0204521	0.211005	0.433109	3.74774	8.92192e-05	0.00219667
NUDT4	0.878751	7.41156	6.2412e-14	9.18074e-13	2.05315	FALSE	0.709815	5.64669	8.17815e-09	1.888e-07	0.1156	0.919952	0.178799	0.50035
ADRA1A	0.771415	7.4051	6.55273e-14	9.63177e-13	0.569289	FALSE	0.360154	3.52035	0.00021549	0.00325775	0.0307633	0.299022	0.382462	0.50035
TCF7	0.710318	7.40173	6.72111e-14	9.87188e-13	1.61024	FALSE	0.283993	2.77297	0.00277738	0.0355979	0.453946	4.43288	4.64921e-06	0.00013273
SOX3	0.793471	7.38786	7.46054e-14	1.09497e-12	2.71556	FALSE	0.224272	1.92709	0.0269843	0.26622	0.412444	3.54733	0.000194581	0.00453476
SSBP2	0.806175	7.37307	8.33717e-14	1.22272e-12	2.22204	FALSE	0.369662	3.13333	0.000864175	0.012061	0.329562	2.79515	0.00259382	0.0495122
TRIM8	0.651911	7.36237	9.03395e-14	1.32392e-12	2.05929	FALSE	0.441051	4.6517	1.64608e-06	3.16988e-05	0.115045	1.21327	0.112514	0.50035
EBF2	0.621934	7.34555	1.02459e-13	1.50041e-12	0.67381	FALSE	0.140127	1.83311	0.033393	0.315991	0.052632	0.695693	0.243311	0.50035
SIM1	0.742221	7.34399	1.03662e-13	1.5169e-12	0	FALSE	0.178426	1.77602	0.0378648	0.350647	0.435471	4.3628	6.42035e-06	0.000179981
USP51	0.811824	7.33312	1.12427e-13	1.64393e-12	2.08162	FALSE	0.295989	2.47633	0.006637	0.07794	0.443986	3.71429	0.000101886	0.00249601
ELFN1	0.770873	7.32332	1.20957e-13	1.76734e-12	1.04035	FALSE	0.530091	4.89905	4.81513e-07	9.66128e-06	0.0758018	0.701028	0.241643	0.50035
AGPAT4	0.809844	7.31833	1.25536e-13	1.83288e-12	2.09681	FALSE	0.147877	1.23037	0.109278	0.497983	0.527071	4.40105	5.38637e-06	0.000152301
CD36	0.757398	7.31777	1.26059e-13	1.83914e-12	0	FALSE	0.0616524	0.527375	0.298967	0.497983	0.626549	5.37373	3.85613e-08	1.30015e-06
PPP2R5A	0.668905	7.31047	1.33106e-13	1.94052e-12	2.13825	FALSE	0.419374	4.26696	9.90759e-06	0.000176742	0.0408702	0.414564	0.33923	0.50035
PIK3IP1	0.665651	7.30431	1.39344e-13	2.02995e-12	1.33037	FALSE	0.118456	1.1897	0.117083	0.497983	0.258467	2.60587	0.00458207	0.0822437
FAM134B	0.866674	7.30048	1.43377e-13	2.08715e-12	1.01747	FALSE	0.718411	5.70926	5.67354e-09	1.31598e-07	0.173384	1.38011	0.083776	0.50035
LRRC23	0.794776	7.29743	1.46663e-13	2.1334e-12	0.947738	FALSE	0.564015	4.79679	8.06131e-07	1.58346e-05	0.304453	2.58746	0.00483437	0.0860063
NHS	0.674341	7.29647	1.47703e-13	2.14694e-12	1.71714	FALSE	0.442789	4.54433	2.75554e-06	5.17435e-05	0.178816	1.83738	0.033077	0.424229
AGMO	0.829315	7.29585	1.48385e-13	2.15526e-12	0	FALSE	0.0576713	0.453583	0.325065	0.497983	0.716178	5.71063	5.62786e-09	2.00792e-07
CAMK1G	0.796251	7.28745	1.57939e-13	2.29233e-12	1.10787	FALSE	0.135922	1.14774	0.125539	0.497983	0.711138	6.02128	8.65198e-10	3.26496e-08
PLEKHF1	0.799386	7.27744	1.70112e-13	2.4672e-12	1.2551	FALSE	0.529073	4.47703	3.78435e-06	6.99249e-05	0.034469	0.291117	0.385481	0.50035
SLC22A3	0.842366	7.26914	1.8089e-13	2.62157e-12	0	FALSE	0.0374832	0.295879	0.383661	0.497983	0.69902	5.57221	1.25767e-08	4.35259e-07
MXRA8	0.798513	7.26856	1.81673e-13	2.63098e-12	1.29793	FALSE	0.214465	1.7963	0.0362234	0.338321	0.307306	2.58173	0.00491537	0.08721
SNX18	0.730325	7.2573	1.97442e-13	2.85724e-12	1.92339	FALSE	0.642779	5.96375	1.23259e-09	2.97505e-08	0.162781	1.50609	0.0660226	0.50035
LOR	0.730799	7.25051	2.07602e-13	3.00205e-12	1.08783	FALSE	0.249582	2.51594	0.00593572	0.0707634	0.192921	1.94439	0.0259242	0.34987
PHLDA3	0.682354	7.24656	2.13742e-13	3.08855e-12	1.46998	FALSE	0.545449	5.43904	2.67848e-08	5.90559e-07	0.0859366	0.855575	0.196117	0.50035
NUDT9	0.737786	7.23446	2.33697e-13	3.37442e-12	2.02638	FALSE	0.460255	4.20364	1.31331e-05	0.000232172	0.257166	2.34969	0.00939456	0.152103
TMEM200A	0.7659	7.23308	2.36077e-13	3.40627e-12	0.838138	FALSE	0.134628	1.1663	0.121746	0.497983	0.48045	4.16885	1.53068e-05	0.00041071
ZEB1	0.484002	7.22926	2.42825e-13	3.50107e-12	2.16681	FALSE	0.360832	5.05959	2.10079e-07	4.41841e-06	0.0173888	0.243753	0.403711	0.50035
RND2	0.827509	7.22821	2.44694e-13	3.52542e-12	1.71182	FALSE	0.358805	2.88142	0.00197943	0.0260861	0.0468849	0.376507	0.35327	0.50035
MACROD2	0.868203	7.21185	2.75978e-13	3.97323e-12	1.91187	FALSE	0.429736	3.30773	0.000470281	0.00686631	0.436556	3.36009	0.00038959	0.00863832
EXOC5	0.670883	7.2028	2.94942e-13	4.24314e-12	2.20581	FALSE	0.530264	5.3751	3.82692e-08	8.39058e-07	0.213722	2.1688	0.0150489	0.226113
STRA6	0.80484	7.19779	3.05988e-13	4.39883e-12	1.32081	FALSE	0.318488	2.61535	0.00445675	0.0548306	0.232103	1.90821	0.0281818	0.373404
RALYL	0.792392	7.19302	3.1687e-13	4.55193e-12	1.02627	FALSE	0.590342	4.89388	4.94347e-07	9.88845e-06	0.291894	2.41927	0.00777592	0.129311
TLX3	0.759434	7.192	3.19252e-13	4.58279e-12	0.51972	FALSE	0.535668	4.80771	7.63358e-07	1.50395e-05	0.197761	1.77865	0.0376487	0.466845
CUEDC1	0.728106	7.18773	3.29379e-13	4.7247e-12	2.17371	FALSE	0.535903	4.9815	3.15474e-07	6.49585e-06	0.0666353	0.619253	0.267875	0.50035
GRASP	0.737398	7.17733	3.55432e-13	5.0947e-12	1.38826	FALSE	0.543995	5.20787	9.55082e-08	2.04602e-06	0.124828	1.19994	0.115082	0.50035
BACH2	0.66896	7.16461	3.90045e-13	5.58675e-12	1.48024	FALSE	0.115814	1.1502	0.125031	0.497983	0.442684	4.40963	5.17745e-06	0.000147029
NR3C1	0.822266	7.15924	4.05641e-13	5.8059e-12	0.847888	FALSE	0.516313	4.21254	1.26256e-05	0.000223603	0.0700294	0.57336	0.2832	0.50035
LPP	0.563609	7.15493	4.18572e-13	5.98662e-12	1.5364	FALSE	0.230028	2.71832	0.00328069	0.0414533	0.211733	2.50633	0.00609959	0.105085
KLC3	0.830658	7.15408	4.21186e-13	6.01962e-12	1.09071	FALSE	0.462437	3.6786	0.000117258	0.00185262	0.252004	2.01172	0.0221247	0.310331
CLSTN2	0.792579	7.13673	4.77882e-13	6.82495e-12	0.745898	FALSE	0.541787	4.58815	2.23598e-06	4.25161e-05	0.290185	2.43912	0.00736156	0.123678
CARMIL1	0.73166	7.13606	4.80231e-13	6.8535e-12	1.31512	FALSE	0.159146	1.41025	0.0792336	0.497983	0.535377	4.78398	8.59296e-07	2.61021e-05
SP6	0.717853	7.12207	5.31578e-13	7.58079e-12	0.888876	FALSE	0.168039	1.68268	0.0462181	0.414127	0.225391	2.2486	0.0122688	0.190468
FILIP1L	0.814157	7.12172	5.32948e-13	7.5948e-12	0.764973	FALSE	0.0477078	0.383937	0.350512	0.497983	0.712995	5.77977	3.74013e-09	1.34913e-07
PHF21A	0.618775	7.11734	5.50155e-13	7.83432e-12	2.03332	FALSE	0.0486374	0.517565	0.302381	0.497983	0.496487	5.30551	5.61798e-08	1.8685e-06
SPAG8	0.864174	7.11062	5.77617e-13	8.21943e-12	0.719149	FALSE	0.201837	1.50251	0.0664823	0.497983	0.723124	5.4096	3.1582e-08	1.07406e-06
ZFP811	0.652438	7.10919	5.83627e-13	8.29611e-12	1.81635	FALSE	0.32271	3.25436	0.000568237	0.00819289	0.228579	2.307	0.0105273	0.168222
SH2D4A	0.833728	7.10914	5.83852e-13	8.29611e-12	0	FALSE	0.0828607	0.634735	0.262801	0.497983	0.729762	5.61809	9.65413e-09	3.36488e-07
GNG3	0.85281	7.09353	6.53652e-13	9.28119e-12	1.74229	FALSE	0.608603	4.75482	9.93127e-07	1.94298e-05	0.0396705	0.309965	0.378294	0.50035
KIT	0.60596	7.09271	6.57547e-13	9.32975e-12	1.82483	FALSE	0.422179	4.5909	2.20667e-06	4.19995e-05	0.1222	1.3293	0.091874	0.50035
SOX14	0.857839	7.08916	6.7462e-13	9.56508e-12	0.607893	FALSE	0.640117	4.83623	6.61633e-07	1.31011e-05	0.0716275	0.540997	0.294255	0.50035
ADAMTS3	0.772699	7.08334	7.03588e-13	9.9686e-12	1.1394	FALSE	0.604341	5.19287	1.03539e-07	2.21324e-06	0.138122	1.18747	0.117521	0.50035
CALCOCO1	0.78088	7.07507	7.46878e-13	1.05743e-11	1.53639	FALSE	0.0781044	0.645921	0.259165	0.497983	0.68494	5.69459	6.18333e-09	2.19017e-07
SGCE	0.8417	7.06948	7.77577e-13	1.1001e-11	1.80387	FALSE	0.0860081	0.662736	0.25375	0.497983	0.726643	5.62273	9.398e-09	3.28144e-07
NRXN1	0.710237	7.05209	8.81282e-13	1.24592e-11	1.29857	FALSE	0.188059	1.72482	0.0422804	0.385064	0.491895	4.51943	3.10032e-06	9.0532e-05
TCF4	0.649926	7.04573	9.22479e-13	1.30323e-11	2.82973	FALSE	0.182039	1.82454	0.034035	0.321246	0.344671	3.45756	0.000272546	0.00619718
C1QTNF4	0.788872	7.03789	9.75896e-13	1.3777e-11	1.31812	FALSE	0.510149	4.23232	1.15647e-05	0.00020537	0.195252	1.61996	0.0526205	0.50035
TSPYL4	0.790234	7.03294	1.01113e-12	1.42642e-11	1.75708	FALSE	0.45995	3.80391	7.12148e-05	0.0011626	0.252984	2.09201	0.018219	0.264236
CROCC	0.558195	7.03053	1.02877e-12	1.45025e-11	1.71636	FALSE	0.398784	4.6983	1.31167e-06	2.54085e-05	0.15009	1.76925	0.0384263	0.473049
CCDC8	0.754078	7.02679	1.05668e-12	1.48852e-11	1.45909	FALSE	0.481545	4.19725	1.35087e-05	0.000238168	0.326617	2.85049	0.00218257	0.0428285
ZSWIM5	0.636716	7.02068	1.10394e-12	1.55398e-11	1.48292	FALSE	0.527583	5.46752	2.28185e-08	5.06524e-07	0.0661322	0.685766	0.24643	0.50035
SERINC2	0.808137	7.02014	1.10823e-12	1.55891e-11	1.60985	FALSE	0.471548	3.85738	5.73037e-05	0.00095375	0.0775842	0.634818	0.262774	0.50035
FGFBP3	0.768925	7.01672	1.13571e-12	1.59643e-11	1.65069	FALSE	0.4433	3.80254	7.16108e-05	0.00116712	0.286791	2.466	0.00683153	0.115665
SESN3	0.674889	7.01534	1.14696e-12	1.61109e-11	2.19365	FALSE	0.142688	1.37239	0.0849716	0.497983	0.345652	3.33416	0.000427782	0.00938967
KRTCAP3	0.882301	7.01304	1.166e-12	1.63666e-11	0.945926	FALSE	0.817512	6.06312	6.67521e-10	1.64764e-08	0.0496558	0.368417	0.356281	0.50035
PRNP	0.755813	7.01054	1.18699e-12	1.66492e-11	1.3337	FALSE	0.235562	1.98106	0.0237921	0.238932	0.344093	2.91604	0.00177255	0.0354926
IVL	0.839833	7.0088	1.20186e-12	1.68457e-11	0	FALSE	0.204824	1.51488	0.064901	0.497983	0.0220171	0.162929	0.435287	0.50035
FIGN	0.552619	7.00121	1.26878e-12	1.7771e-11	2.47792	FALSE	0.424967	5.03931	2.33612e-07	4.88196e-06	0.120565	1.42555	0.0769991	0.50035
NBEA	0.473185	6.98727	1.40146e-12	1.96155e-11	1.90642	FALSE	0.331247	4.58224	2.30007e-06	4.35658e-05	0.136327	1.88082	0.0299985	0.391918
PALMD	0.783391	6.98683	1.40579e-12	1.96621e-11	0.619689	FALSE	0.396198	3.53789	0.000201668	0.0030677	0.0238203	0.211304	0.416325	0.50035
LZTS1	0.620047	6.9811	1.46439e-12	2.04671e-11	0.662889	FALSE	0.118518	1.49922	0.0669087	0.497983	0.0616245	0.799565	0.211982	0.50035
CNTN2	0.767208	6.97772	1.5001e-12	2.09512e-11	0.616236	FALSE	0.509802	4.27088	9.73517e-06	0.000173825	0.0478555	0.401034	0.344198	0.50035
TOP1MT	0.854348	6.97153	1.56753e-12	2.18775e-11	1.43251	FALSE	0.713005	5.43655	2.71607e-08	5.98175e-07	0.181172	1.38007	0.0837832	0.50035
ATP8A1	0.636359	6.96902	1.5958e-12	2.22562e-11	1.48029	FALSE	0.485981	4.97039	3.34088e-07	6.86473e-06	0.110976	1.13556	0.128071	0.50035
IER5	0.707782	6.96549	1.63626e-12	2.28042e-11	1.98686	FALSE	0.373186	3.47732	0.000253229	0.00380774	0.0436659	0.406271	0.342272	0.50035
ARMCX4	0.53744	6.96328	1.66222e-12	2.31496e-11	2.00316	FALSE	0.160071	1.94577	0.0258414	0.256622	0.275004	3.34745	0.000407793	0.00901139
PRLR	0.82538	6.96094	1.69003e-12	2.35201e-11	0	FALSE	0.0650413	0.498242	0.309157	0.497983	0.779351	5.99119	1.04153e-09	3.92284e-08
RTN4RL1	0.807125	6.94775	1.85573e-12	2.5808e-11	0.927933	FALSE	0.575253	4.64493	1.70096e-06	3.27235e-05	0.351591	2.83945	0.00225957	0.044119
MAPK8IP1	0.76694	6.93602	2.01652e-12	2.80241e-11	1.82118	FALSE	0.581285	4.89577	4.89616e-07	9.80382e-06	0.196983	1.65692	0.0487673	0.50035
LRRTM1	0.770125	6.93425	2.04186e-12	2.83563e-11	0.835105	FALSE	0.500221	4.14731	1.68202e-05	0.000293912	0.135182	1.12473	0.130353	0.50035
TAGLN3	0.76349	6.93181	2.07739e-12	2.88293e-11	1.41413	FALSE	0.477759	4.09613	2.10054e-05	0.000363162	0.374408	3.22389	0.000632308	0.0134429
CYTL1	0.834641	6.93071	2.09361e-12	2.90339e-11	1.02052	FALSE	0.51335	4.12003	1.89412e-05	0.000329215	0.224224	1.79871	0.0360322	0.452663
LEMD1	0.77358	6.93018	2.10152e-12	2.91229e-11	1.28318	FALSE	0.46734	3.89561	4.89763e-05	0.000817924	0.105053	0.876124	0.190481	0.50035
RXRA	0.782138	6.92936	2.11375e-12	2.92718e-11	1.32454	FALSE	0.734692	6.11036	4.97018e-10	1.24084e-08	0.0832055	0.691634	0.244583	0.50035
SCN7A	0.850406	6.9277	2.13876e-12	2.95972e-11	0	FALSE	0.048581	0.356882	0.36059	0.497983	0.773747	5.74729	4.53432e-09	1.62071e-07
CEP170B	0.77688	6.92583	2.16717e-12	2.99692e-11	1.10613	FALSE	0.575604	4.82468	7.01148e-07	1.38417e-05	0.0315357	0.264528	0.395687	0.50035
DCHS2	0.826279	6.89886	2.62112e-12	3.62212e-11	0.492204	FALSE	0.216225	1.6595	0.0485074	0.42954	0.522891	4.03991	2.67357e-05	0.000697652
MYO5C	0.828075	6.88635	2.86206e-12	3.9523e-11	0.747159	FALSE	0.122249	0.922792	0.178058	0.497983	0.775143	5.87859	2.06893e-09	7.64568e-08
PDCD4	0.623985	6.88155	2.96021e-12	4.08497e-11	2.55077	FALSE	0.0485902	0.502203	0.307762	0.497983	0.491481	5.08628	1.82578e-07	5.87333e-06
DUSP9	0.84256	6.86651	3.28951e-12	4.5362e-11	1.10583	FALSE	0.682164	5.29554	5.93313e-08	1.28647e-06	0.0509677	0.39608	0.346023	0.50035
FYN	0.776598	6.86552	3.31239e-12	4.56453e-11	2.11282	FALSE	0.667355	5.52752	1.62398e-08	3.66292e-07	0.175651	1.45123	0.0733574	0.50035
TGIF1	0.825114	6.85399	3.59083e-12	4.94477e-11	2.43585	FALSE	0.557939	4.33239	7.37511e-06	0.000133384	0.202319	1.57298	0.0578622	0.50035
FBXO32	0.720832	6.84219	3.89963e-12	5.36623e-11	1.34205	FALSE	0.421656	3.77553	7.98348e-05	0.00129257	0.131678	1.17933	0.119134	0.50035
4933415A04RIK	0.700904	6.83705	4.04194e-12	5.55816e-11	1.40362	FALSE	0.501523	4.5464	2.72856e-06	5.1286e-05	0.218253	1.97827	0.0239492	0.328411
RHOBTB2	0.68489	6.8159	4.68373e-12	6.4362e-11	1.41858	FALSE	0.466568	4.318	7.87258e-06	0.000141989	0.202199	1.87063	0.0306984	0.39841
IFITM2	0.530244	6.8132	4.77255e-12	6.55365e-11	3.95806	FALSE	0.300319	3.66016	0.000126031	0.00198484	0.141658	1.72383	0.0423696	0.50035
CHRNA3	0.739164	6.81171	4.82224e-12	6.61726e-11	0.728228	FALSE	0.248921	2.40479	0.00809094	0.0935032	0.259315	2.52492	0.00578619	0.100667
NPTX2	0.730562	6.80621	5.01005e-12	6.87018e-11	1.67286	FALSE	0.299249	2.66577	0.00384061	0.0478807	0.15095	1.34398	0.0894777	0.50035
FRA10AC1	0.727499	6.80295	5.1248e-12	7.02262e-11	1.90057	FALSE	0.47578	4.12547	1.84988e-05	0.000321811	0.257689	2.23893	0.0125802	0.194685
GTF2IRD1	0.729046	6.79286	5.49676e-12	7.52707e-11	2.10721	FALSE	0.629095	5.50384	1.85804e-08	4.15739e-07	0.193948	1.69814	0.044741	0.50035
RNF122	0.775402	6.79182	5.53642e-12	7.57609e-11	1.62756	FALSE	0.543871	4.44246	4.44686e-06	8.17048e-05	0.0903788	0.738839	0.230002	0.50035
LRP8	0.690146	6.79085	5.5736e-12	7.62165e-11	1.43202	FALSE	0.346546	3.16113	0.000785791	0.0110773	0.269098	2.45821	0.00698163	0.117901
GAREM2	0.776711	6.79068	5.58024e-12	7.62543e-11	1.19441	FALSE	0.582782	4.71402	1.21441e-06	2.3571e-05	0.273355	2.21001	0.0135523	0.208252
ABCA1	0.617458	6.77974	6.01952e-12	8.21998e-11	1.2983	FALSE	0.117712	1.19374	0.11629	0.497983	0.361502	3.68778	0.000113111	0.00274361
P3H2	0.770039	6.77314	6.30071e-12	8.59797e-11	1.33037	FALSE	0.332651	2.74827	0.0029955	0.0380704	0.0297551	0.246056	0.402819	0.50035
GM5796	0.740583	6.76536	6.64908e-12	9.06706e-11	1.0015	FALSE	0.674776	5.74284	4.65521e-09	1.08491e-07	0.0374563	0.318768	0.374951	0.50035
HPRT	0.801454	6.74972	7.40629e-12	1.00926e-10	2.10226	FALSE	0.45253	3.55206	0.000191117	0.00292079	0.243182	1.91191	0.0279436	0.372259
MYT1L	0.766567	6.73695	8.08717e-12	1.10128e-10	0.884092	FALSE	0.564359	4.57028	2.43532e-06	4.59946e-05	0.15713	1.2735	0.101421	0.50035
DDO	0.806262	6.73353	8.27951e-12	1.12669e-10	0	FALSE	0.047045	0.350917	0.362825	0.497983	0.698242	5.27052	6.80176e-08	2.24321e-06
ARPC1B	0.782226	6.7268	8.67167e-12	1.17924e-10	1.78681	FALSE	0.663294	5.30603	5.60194e-08	1.2187e-06	0.0644183	0.514786	0.303351	0.50035
CAPSL	0.817314	6.7233	8.88281e-12	1.20711e-10	0.815188	FALSE	0.448886	3.3618	0.000387186	0.0056912	0.408148	3.07032	0.00106914	0.0221071
MID1IP1	0.810542	6.71694	9.27932e-12	1.26013e-10	1.73495	FALSE	0.626847	4.88885	5.07133e-07	1.01339e-05	0.0565231	0.441307	0.329495	0.50035
CD200	0.795563	6.71638	9.31474e-12	1.26406e-10	1.05225	FALSE	0.559724	4.35432	6.67408e-06	0.000120928	0.47458	3.7042	0.000106028	0.00258137
AP3M2	0.833806	6.71243	9.57017e-12	1.29783e-10	1.22672	FALSE	0.677023	5.07053	1.98353e-07	4.17627e-06	0.0838041	0.62754	0.265153	0.50035
SLC2A3	0.511339	6.70546	1.00389e-11	1.36046e-10	3.37409	FALSE	0.187142	2.31463	0.0103166	0.11555	0.196269	2.42877	0.00757498	0.126516
PPARGC1B	0.79847	6.70527	1.00515e-11	1.36122e-10	0.986151	FALSE	0.257012	1.93874	0.0262666	0.260187	0.0786271	0.593689	0.27636	0.50035
HCK	0.723204	6.70324	1.01922e-11	1.37933e-10	0.959385	FALSE	0.0951506	0.880995	0.18916	0.497983	0.43439	4.0304	2.78409e-05	0.000721694
PLEKHG3	0.773256	6.69431	1.08346e-11	1.46525e-10	1.13012	FALSE	0.112624	0.896618	0.184961	0.497983	0.656479	5.24279	7.90819e-08	2.59502e-06
ASTN1	0.643894	6.69341	1.09012e-11	1.47324e-10	1.38934	FALSE	0.3631	3.55435	0.00018946	0.00289771	0.231653	2.27222	0.0115366	0.180961
OSBPL6	0.825916	6.67096	1.27072e-11	1.71613e-10	1.39406	FALSE	0.38555	2.83827	0.00226791	0.0296688	0.311325	2.30345	0.0106267	0.169365
TUBA1C	0.455767	6.65532	1.41343e-11	1.90755e-10	2.42884	FALSE	0.323985	4.44266	4.44273e-06	8.17048e-05	0.0604509	0.830671	0.20308	0.50035
EEA1	0.739325	6.64487	1.51741e-11	2.04647e-10	1.73787	FALSE	0.647017	5.48665	2.04815e-08	4.56713e-07	0.0769934	0.651482	0.257368	0.50035
WIPF3	0.813708	6.63951	1.5736e-11	2.12079e-10	1.21094	FALSE	0.620189	4.85565	5.99973e-07	1.19404e-05	0.0694412	0.544352	0.2931	0.50035
WSCD2	0.684345	6.62371	1.75148e-11	2.35891e-10	0.777284	FALSE	0.238632	2.4984	0.0062378	0.0738711	0.104637	1.11613	0.132184	0.50035
ITGA3	0.790076	6.62323	1.75716e-11	2.36494e-10	0.977675	FALSE	0.0868314	0.655193	0.256172	0.497983	0.620644	4.71572	1.20431e-06	3.64131e-05
CHD3OS	0.80119	6.62291	1.761e-11	2.36848e-10	2.01797	FALSE	0.584441	4.52768	2.98179e-06	5.56194e-05	0.161078	1.24814	0.105989	0.50035
CCNE1	0.471002	6.6207	1.78747e-11	2.40243e-10	2.79413	FALSE	0.177877	2.3298	0.00990825	0.111485	0.193595	2.53399	0.00563867	0.0986165
GM45340	0.726389	6.61698	1.83304e-11	2.462e-10	0.884752	FALSE	0.324142	2.78202	0.00270108	0.0346653	0.388021	3.34568	0.000410401	0.00904865
AEBP1	0.847438	6.61024	1.91849e-11	2.575e-10	0.982671	FALSE	0.484279	3.5199	0.000215854	0.00326075	0.0460952	0.334097	0.369153	0.50035
3110082J24RIK	0.794812	6.60743	1.95523e-11	2.62252e-10	1.16164	FALSE	0.674485	5.21045	9.41939e-08	2.02228e-06	0.115516	0.891883	0.186228	0.50035
FBRSL1	0.7635	6.60111	2.04041e-11	2.7349e-10	1.85642	FALSE	0.675222	5.49336	1.97179e-08	4.40187e-07	0.052481	0.427567	0.334483	0.50035
IFI30	0.616576	6.59594	2.11289e-11	2.83011e-10	1.68735	FALSE	0.454369	4.51513	3.16387e-06	5.8814e-05	0.0364911	0.361576	0.358834	0.50035
SLC18A3	0.789135	6.59121	2.18122e-11	2.91965e-10	0.458452	FALSE	0.362949	2.94047	0.00163855	0.0219627	0.047394	0.385098	0.350082	0.50035
CAR14	0.781866	6.5841	2.28819e-11	3.06075e-10	2.36697	FALSE	0.586276	4.62701	1.8549e-06	3.55803e-05	0.0385993	0.304927	0.380211	0.50035
ATP6V1B2	0.865383	6.56474	2.60622e-11	3.48378e-10	2.25661	FALSE	0.499734	3.54365	0.000197317	0.00301319	0.30434	2.16521	0.015186	0.227999
IDI1	0.680201	6.56264	2.64323e-11	3.53084e-10	2.78369	FALSE	0.303281	2.73947	0.00307692	0.0390545	0.251265	2.27037	0.0115926	0.181695
RASSF9	0.859995	6.53523	3.17567e-11	4.2392e-10	0	FALSE	0.0764534	0.526101	0.299409	0.497983	0.819587	5.68648	6.48408e-09	2.28176e-07
TESC	0.815475	6.5339	3.20388e-11	4.27394e-10	0.850299	FALSE	0.466411	3.41129	0.000323282	0.00480339	0.0646772	0.473027	0.318097	0.50035
ETV1	0.736408	6.53252	3.23363e-11	4.31071e-10	1.2944	FALSE	0.324715	2.66769	0.00381868	0.0476404	0.132115	1.08925	0.138021	0.50035
FIGNL2	0.574456	6.53101	3.2664e-11	4.35142e-10	2.07596	FALSE	0.488652	5.19314	1.03389e-07	2.21244e-06	0.0375726	0.398983	0.344953	0.50035
GM27032	0.738029	6.52878	3.31548e-11	4.41382e-10	1.72671	FALSE	0.362722	2.98748	0.00140645	0.0191526	0.290013	2.38564	0.00852461	0.139051
CP	0.686907	6.52781	3.33691e-11	4.43933e-10	0.720916	FALSE	0.183188	1.8913	0.029292	0.283151	0.0965412	0.997532	0.159253	0.50035
TEX264	0.752716	6.5258	3.38204e-11	4.49633e-10	1.31584	FALSE	0.417375	3.32282	0.000445564	0.00651513	0.415809	3.32378	0.00044403	0.00971371
EVA1B	0.706179	6.52303	3.44514e-11	4.57712e-10	1.50321	FALSE	0.0839107	0.729567	0.232827	0.497983	0.15749	1.37034	0.0852901	0.50035
ZDHHC1	0.849838	6.52062	3.5009e-11	4.64805e-10	0.895417	FALSE	0.0874356	0.605189	0.272527	0.497983	0.77639	5.40099	3.31365e-08	1.1211e-06
BAZ1A	0.733764	6.5175	3.57449e-11	4.74255e-10	2.2784	FALSE	0.312592	2.58831	0.00482235	0.0588123	0.331987	2.74988	0.00298084	0.0560814
MFAP2	0.754476	6.5146	3.64417e-11	4.83172e-10	2.19883	FALSE	0.0738793	0.583198	0.27988	0.497983	0.637087	5.04271	2.29492e-07	7.34635e-06
RAVER2	0.761013	6.51261	3.69283e-11	4.89294e-10	1.70161	FALSE	0.395646	3.17322	0.000753784	0.010649	0.335833	2.69543	0.00351491	0.0649464
SHD	0.820903	6.5023	3.95501e-11	5.23679e-10	1.32153	FALSE	0.052931	0.388453	0.34884	0.497983	0.699493	5.15722	1.2532e-07	4.0782e-06
MAGED1	0.739086	6.49485	4.15591e-11	5.49909e-10	2.7445	FALSE	0.164672	1.33893	0.090296	0.497983	0.481928	3.92448	4.3459e-05	0.00110753
KCNJ3	0.825165	6.49408	4.17718e-11	5.52351e-10	0.998244	FALSE	0.690379	5.08937	1.79624e-07	3.79414e-06	0.0696662	0.513715	0.303726	0.50035
ADAMTS5	0.71844	6.49316	4.20263e-11	5.54971e-10	0.882412	FALSE	0.110513	0.911066	0.18113	0.497983	0.597118	4.92475	4.22342e-07	1.3155e-05
TOX	0.784333	6.49316	4.20265e-11	5.54971e-10	1.12435	FALSE	0.258286	1.98308	0.023679	0.237918	0.513862	3.95079	3.8946e-05	0.00100162
PITPNM1	0.833202	6.48917	4.31541e-11	5.69477e-10	1.0232	FALSE	0.77268	5.61933	9.58483e-09	2.1998e-07	0.0323124	0.234832	0.407169	0.50035
ZDBF2	0.375894	6.47671	4.68716e-11	6.18119e-10	2.28319	FALSE	0.274061	4.44533	4.38779e-06	8.07707e-05	0.0746578	1.20987	0.113163	0.50035
ANKS1B	0.780808	6.45647	5.35863e-11	7.06195e-10	0.686583	FALSE	0.378527	2.90344	0.00184543	0.0244728	0.0634947	0.486876	0.313173	0.50035
CDC25B	0.566287	6.45187	5.5238e-11	7.27473e-10	1.76374	FALSE	0.29466	3.33723	0.000423085	0.00619566	0.108912	1.2434	0.106861	0.50035
CLCN5	0.582211	6.44938	5.61559e-11	7.39066e-10	2.09779	FALSE	0.424338	4.40003	5.41167e-06	9.90608e-05	0.0534372	0.553879	0.289831	0.50035
KRT15	0.793391	6.44659	5.71969e-11	7.51913e-10	0	FALSE	0.22731	1.74283	0.0406814	0.372808	0.232374	1.77888	0.0376294	0.466845
HIST3H2BA	0.804683	6.44656	5.72087e-11	7.51913e-10	1.92784	FALSE	0.0899146	0.665083	0.252999	0.497983	0.457828	3.39536	0.000342696	0.00768539
KRT36	0.819803	6.44217	5.88899e-11	7.73491e-10	0	FALSE	0.119546	0.880092	0.189405	0.497983	0.648097	4.79447	8.15528e-07	2.48882e-05
F2R	0.690966	6.44083	5.94119e-11	7.79826e-10	2.14308	FALSE	0.533089	4.686	1.39296e-06	2.693e-05	0.142878	1.25713	0.104353	0.50035
MET	0.7863	6.43141	6.32108e-11	8.29135e-10	0.973121	FALSE	0.244635	1.8443	0.0325694	0.310191	0.457222	3.45506	0.000275089	0.00624777
TMEM158	0.56	6.42206	6.72194e-11	8.81126e-10	1.80298	FALSE	0.208112	2.2238	0.0130809	0.141894	0.0551452	0.590273	0.277504	0.50035
TCEAL3	0.847295	6.42163	6.74133e-11	8.83078e-10	1.40767	FALSE	0.697715	4.89588	4.89324e-07	9.80382e-06	0.0636593	0.447269	0.32734	0.50035
ATXN1	0.722454	6.41754	6.92457e-11	9.06476e-10	0.878466	FALSE	0.34405	2.83629	0.00228201	0.0298136	0.336688	2.77186	0.00278685	0.0527352
UNG	0.202259	6.41271	7.14761e-11	9.3505e-10	2.7769	FALSE	0.037266	1.10542	0.134488	0.497983	0.0842539	2.49931	0.00622181	0.106971
ETV4	0.760558	6.40421	7.5577e-11	9.8804e-10	0.935452	FALSE	0.414823	3.30003	0.000483377	0.00704703	0.222418	1.76735	0.0385849	0.474175
H2-KE6	0.713585	6.3885	8.37579e-11	1.09426e-09	2.15851	FALSE	0.490723	4.18121	1.44979e-05	0.000254922	0.148566	1.26471	0.102988	0.50035
ITGAV	0.686903	6.36527	9.74758e-11	1.27263e-09	1.27838	FALSE	0.203841	1.80077	0.0358694	0.335974	0.387904	3.447	0.000283428	0.00642973
LSAMP	0.697085	6.36005	1.00844e-10	1.31573e-09	1.50434	FALSE	0.345159	2.96333	0.00152167	0.0205504	0.185402	1.59313	0.0555652	0.50035
APBB2	0.631639	6.3573	1.02664e-10	1.33859e-09	1.61835	FALSE	0.209026	1.94025	0.0261747	0.259407	0.432696	4.03261	2.75802e-05	0.000716829
PTPN3	0.74818	6.35416	1.04785e-10	1.36534e-09	0.973448	FALSE	0.519216	4.05967	2.45713e-05	0.000420003	0.0330617	0.258529	0.398	0.50035
BC028528	0.819374	6.35265	1.05819e-10	1.3779e-09	1.18114	FALSE	0.316532	2.24332	0.0124383	0.136127	0.437642	3.11322	0.000925291	0.0192954
SLC35F2	0.719813	6.33376	1.19631e-10	1.5567e-09	1.35245	FALSE	0.518918	4.26145	1.01552e-05	0.000180994	0.160699	1.32147	0.0931716	0.50035
DPYSL4	0.748393	6.33085	1.21904e-10	1.58524e-09	1.57811	FALSE	0.451146	3.63501	0.000138986	0.00216626	0.250884	2.02182	0.0215973	0.30402
SKOR1	0.806491	6.32499	1.26624e-10	1.64552e-09	0	FALSE	0.0490349	0.349844	0.363228	0.497983	0.742289	5.34136	4.61252e-08	1.54985e-06
CCDC3	0.77366	6.32383	1.27582e-10	1.65688e-09	0	FALSE	0.229588	1.68062	0.0464182	0.415007	0.592293	4.3417	7.06938e-06	0.000196769
SSBP4	0.736945	6.32306	1.28221e-10	1.66407e-09	1.53305	FALSE	0.464729	3.68517	0.000114274	0.00181131	0.246567	1.95397	0.0253525	0.343572
VSX1	0.747304	6.31551	1.34634e-10	1.74614e-09	0.486782	FALSE	0.268533	2.33222	0.00984462	0.110832	0.29817	2.62897	0.00428214	0.0775886
LAMB1	0.638829	6.31152	1.38151e-10	1.79058e-09	1.72134	FALSE	0.312012	2.9314	0.00168717	0.0224915	0.149719	1.40835	0.0795137	0.50035
PDK1	0.754313	6.3085	1.40879e-10	1.82473e-09	2.13227	FALSE	0.628656	4.92285	4.26466e-07	8.61848e-06	0.0591052	0.463155	0.321627	0.50035
DNMT3B	0.641206	6.30771	1.41593e-10	1.83277e-09	2.67818	FALSE	0.279497	2.59733	0.00469756	0.0574331	0.202284	1.88437	0.0297577	0.389811
PCDH1	0.715013	6.30542	1.43709e-10	1.85893e-09	1.16096	FALSE	0.337367	2.88294	0.00196988	0.0259942	0.0428048	0.367715	0.356543	0.50035
A930004D18RIK	0.804698	6.29142	1.57285e-10	2.0332e-09	1.54505	FALSE	0.642091	4.66044	1.57769e-06	3.04116e-05	0.166724	1.20817	0.113491	0.50035
SERPINB6A	0.788542	6.28596	1.62914e-10	2.10458e-09	1.69008	FALSE	0.606455	4.52447	3.02739e-06	5.64164e-05	0.0507897	0.378873	0.352391	0.50035
BCAR3	0.796336	6.27628	1.73387e-10	2.2384e-09	1.37603	FALSE	0.413546	3.04386	0.00116783	0.0161042	0.470617	3.46596	0.000264175	0.0060278
SPINK2	0.840846	6.27333	1.76702e-10	2.2797e-09	1.00254	FALSE	0.726473	5.04029	2.32414e-07	4.86212e-06	0.0705786	0.488978	0.312429	0.50035
1810011O10RIK	0.787931	6.26982	1.80737e-10	2.33022e-09	1.15208	FALSE	0.526546	3.89613	4.88719e-05	0.000816878	0.148099	1.09885	0.135916	0.50035
EFHD1	0.804703	6.26534	1.86008e-10	2.39661e-09	0.855152	FALSE	0.599187	4.37623	6.03749e-06	0.000110208	0.11007	0.804839	0.210456	0.50035
B4GALT6	0.7296	6.25529	1.98393e-10	2.55451e-09	1.66178	FALSE	0.211781	1.70351	0.0442364	0.398737	0.541056	4.35707	6.59085e-06	0.000184234
ZFP593	0.635243	6.24778	2.08166e-10	2.67859e-09	2.41155	FALSE	0.136819	1.2443	0.106694	0.497983	0.402875	3.66861	0.000121938	0.00293955
SGK3	0.817619	6.23869	2.20623e-10	2.83701e-09	0.753336	FALSE	0.244193	1.7315	0.0416816	0.381044	0.339477	2.41795	0.00780405	0.12945
TMEM55A	0.877413	6.22934	2.34199e-10	3.00962e-09	1.88709	FALSE	0.792108	5.27	6.8213e-08	1.47579e-06	0.0561299	0.373668	0.354326	0.50035
TTYH1	0.753758	6.22887	2.34909e-10	3.01676e-09	1.12131	FALSE	0.393022	3.0173	0.00127519	0.0174377	0.0300582	0.230421	0.408882	0.50035
LDLR	0.56308	6.22791	2.36351e-10	3.03329e-09	1.74023	FALSE	0.18538	1.92505	0.0271114	0.266938	0.187894	1.95416	0.025341	0.343572
PLCH1	0.52572	6.2221	2.4527e-10	3.14571e-09	2.06377	FALSE	0.256729	2.8554	0.00214913	0.0281901	0.118782	1.32175	0.0931254	0.50035
ALX1	0.868516	6.21555	2.55732e-10	3.27774e-09	0.793119	FALSE	0.740236	4.90761	4.60956e-07	9.26777e-06	0.062481	0.414256	0.339343	0.50035
SHISA8	0.69246	6.21339	2.59273e-10	3.32096e-09	1.26311	FALSE	0.333678	2.76243	0.00286867	0.0366484	0.158025	1.30936	0.0952065	0.50035
LAMA1	0.696532	6.20838	2.67664e-10	3.4262e-09	1.45858	FALSE	0.413847	3.53796	0.000201613	0.0030677	0.133593	1.1415	0.126831	0.50035
NEGR1	0.687658	6.20258	2.77724e-10	3.55266e-09	1.48462	FALSE	0.190614	1.57105	0.0580856	0.496651	0.252805	2.08731	0.01843	0.266508
GNG8	0.835986	6.19441	2.92524e-10	3.73954e-09	0.550901	FALSE	0.522411	3.6861	0.000113859	0.00180619	0.0501434	0.354835	0.361357	0.50035
ACAA2	0.658133	6.1912	2.9853e-10	3.81384e-09	1.6974	FALSE	0.2007	1.76155	0.0390727	0.36033	0.13482	1.18098	0.118805	0.50035
BHLHE22	0.619672	6.19016	3.00523e-10	3.8368e-09	0.290876	FALSE	0.125345	1.42767	0.0766936	0.497983	0.0656841	0.75752	0.224369	0.50035
PLCD1	0.84715	6.18863	3.03452e-10	3.87167e-09	1.00853	FALSE	0.501295	3.40061	0.000336173	0.00497116	0.144586	0.984028	0.162551	0.50035
TLE3	0.493699	6.18153	3.17426e-10	4.04734e-09	2.0651	FALSE	0.350451	4.07767	2.27442e-05	0.0003915	0.141033	1.64048	0.0504524	0.50035
STXBP5L	0.828094	6.17728	3.26084e-10	4.15503e-09	0.602621	FALSE	0.277007	1.87412	0.030457	0.292826	0.0589609	0.39829	0.345208	0.50035
PHGDH	0.487719	6.1692	3.43186e-10	4.3701e-09	2.66496	FALSE	0.249037	2.9422	0.00162943	0.0218703	0.186188	2.19461	0.0140959	0.214754
ADGB	0.803713	6.16849	3.44718e-10	4.38677e-09	0	FALSE	0.0749968	0.505818	0.306492	0.497983	0.702227	4.78687	8.47022e-07	2.57692e-05
ZSCAN10	0.760612	6.16752	3.46839e-10	4.4109e-09	1.25116	FALSE	0.592205	4.52929	2.9591e-06	5.52959e-05	0.0476087	0.36484	0.357616	0.50035
DMTN	0.814219	6.15626	3.7242e-10	4.73315e-09	0.770222	FALSE	0.53434	3.75662	8.61128e-05	0.00138621	0.116271	0.817614	0.206789	0.50035
SMIM22	0.855606	6.14823	3.9176e-10	4.97573e-09	0.976584	FALSE	0.659066	4.41421	5.06897e-06	9.29612e-05	0.0698931	0.46866	0.319656	0.50035
LY6E	0.83604	6.14623	3.96727e-10	5.03556e-09	2.10731	FALSE	0.736453	5.08611	1.82745e-07	3.85592e-06	0.0949478	0.655916	0.255939	0.50035
GM43270	0.799546	6.11825	4.73044e-10	6.00035e-09	0	FALSE	0.0630894	0.438955	0.330347	0.497983	0.728061	5.08993	1.79097e-07	5.77079e-06
KDM2B	0.625156	6.11752	4.75225e-10	6.02413e-09	2.49489	FALSE	0.503037	4.57885	2.33774e-06	4.42367e-05	0.117285	1.06684	0.143021	0.50035
DOCK8	0.74785	6.11457	4.84094e-10	6.13259e-09	0	FALSE	0.062422	0.465453	0.320804	0.497983	0.668351	4.98762	3.05644e-07	9.62704e-06
DSG2	0.800639	6.11307	4.88663e-10	6.18648e-09	0.72949	FALSE	0.501921	3.59136	0.000164482	0.00253744	0.13749	0.988274	0.161509	0.50035
ROR1	0.577492	6.11085	4.95509e-10	6.26909e-09	1.23229	FALSE	0.206766	2.14098	0.0161379	0.170622	0.222262	2.30189	0.0106707	0.169685
EPHB1	0.504009	6.10461	5.15251e-10	6.51467e-09	2.12768	FALSE	0.247846	2.81902	0.00240851	0.0312068	0.112466	1.27579	0.101015	0.50035
OSBP2	0.794178	6.09044	5.62996e-10	7.11376e-09	0	FALSE	0.13048	0.91485	0.180135	0.497983	0.710138	5.00695	2.76498e-07	8.75115e-06
BOK	0.567888	6.08773	5.72629e-10	7.23082e-09	2.19302	FALSE	0.252841	2.56262	0.00519429	0.0627633	0.0797041	0.806785	0.209895	0.50035
1190002N15RIK	0.663897	6.0792	6.03909e-10	7.62091e-09	1.61986	FALSE	0.116311	0.973459	0.165163	0.497983	0.558264	4.69022	1.36455e-06	4.11316e-05
ADGRG2	0.81383	6.07795	6.08628e-10	7.67552e-09	0.802483	FALSE	0.544237	3.74179	9.13581e-05	0.00146666	0.321326	2.20327	0.013788	0.210718
MAML2	0.67069	6.07656	6.13943e-10	7.73758e-09	1.28026	FALSE	0.110344	0.911843	0.180926	0.497983	0.440269	3.65875	0.000126724	0.00304742
FZD1	0.689333	6.07463	6.21379e-10	7.82627e-09	1.32253	FALSE	0.597399	4.93086	4.09342e-07	8.32385e-06	0.0338589	0.279605	0.38989	0.50035
OXR1	0.660064	6.07349	6.25781e-10	7.87665e-09	1.6497	FALSE	0.484106	4.1276	1.83288e-05	0.000319136	0.0911493	0.776812	0.218635	0.50035
EFCAB1	0.758577	6.07076	6.36523e-10	8.00673e-09	1.35088	FALSE	0.487206	3.60681	0.00015499	0.00240424	0.345527	2.56089	0.00522026	0.0923074
CPNE5	0.80561	6.05983	6.81347e-10	8.56507e-09	1.59201	FALSE	0.475743	3.34545	0.00041074	0.00602388	0.333449	2.34589	0.00949092	0.15341
CELSR2	0.630023	6.0562	6.9687e-10	8.75459e-09	2.10512	FALSE	0.283169	2.5418	0.00551414	0.066099	0.190779	1.71449	0.0432192	0.50035
TLE4	0.554514	6.04835	7.31694e-10	9.18621e-09	3.10127	FALSE	0.336839	3.45838	0.000271715	0.00406701	0.082717	0.848978	0.197947	0.50035
GM26885	0.803416	6.04744	7.35832e-10	9.23224e-09	0.896581	FALSE	0.277624	1.96321	0.0248112	0.24815	0.597498	4.23755	1.12984e-05	0.000307929
4930429H19RIK	0.839861	6.04356	7.53761e-10	9.45115e-09	0.641121	FALSE	0.136946	0.902258	0.18346	0.497983	0.692142	4.58316	2.29004e-06	6.76769e-05
AK1	0.822094	6.04156	7.63153e-10	9.56281e-09	1.20845	FALSE	0.237309	1.5975	0.0550771	0.477165	0.58449	3.94958	3.91447e-05	0.00100541
TMPRSS5	0.850762	6.04137	7.64033e-10	9.56772e-09	0.486611	FALSE	0.598215	3.94951	3.91558e-05	0.000657837	0.332486	2.18361	0.0144954	0.219589
PPM1H	0.704601	6.03986	7.71247e-10	9.6519e-09	0.969569	FALSE	0.558736	4.55787	2.58371e-06	4.86098e-05	0.0873498	0.713702	0.237706	0.50035
2900011O08RIK	0.816182	6.03905	7.75098e-10	9.69391e-09	0.989357	FALSE	0.774411	5.35157	4.35982e-08	9.52704e-07	0.020618	0.142449	0.443363	0.50035
TUNAR	0.761124	6.03138	8.12812e-10	1.01591e-08	1.37781	FALSE	0.517957	3.7903	7.52322e-05	0.00122209	0.0569705	0.417321	0.338222	0.50035
EMID1	0.71211	6.01934	8.75653e-10	1.09376e-08	1.48541	FALSE	0.286222	2.25974	0.0119188	0.13088	0.204063	1.61081	0.0536107	0.50035
NRARP	0.703627	6.00998	9.27705e-10	1.15804e-08	1.66562	FALSE	0.462298	3.81649	6.76811e-05	0.00111418	0.12456	1.02841	0.151878	0.50035
EFNA5	0.51186	6.00986	9.28405e-10	1.15817e-08	2.55385	FALSE	0.181854	2.01353	0.0220293	0.224329	0.191303	2.11712	0.0171248	0.250964
PDIA5	0.827424	6.00548	9.53824e-10	1.18913e-08	1.5227	FALSE	0.675163	4.6009	2.1033e-06	4.01098e-05	0.179843	1.22599	0.110101	0.50035
ENHO	0.614153	5.99971	9.88346e-10	1.23139e-08	1.72588	FALSE	0.146857	1.33488	0.0909571	0.497983	0.367403	3.3422	0.000415586	0.00915269
PRPS2	0.755433	5.99862	9.95023e-10	1.23892e-08	1.89496	FALSE	0.459551	3.42087	0.000312103	0.00464321	0.26745	1.98867	0.023369	0.321577
0610040J01RIK	0.807962	5.9957	1.01306e-09	1.26057e-08	0.98742	FALSE	0.547623	3.83212	6.35224e-05	0.00105013	0.110239	0.771157	0.220307	0.50035
CDH13	0.675003	5.98146	1.10574e-09	1.37503e-08	1.44327	FALSE	0.386066	3.16972	0.00076292	0.0107703	0.150423	1.23564	0.108297	0.50035
HAND1	0.661311	5.96922	1.19194e-09	1.48128e-08	0	FALSE	0.180734	1.75865	0.0393182	0.362119	0.206497	2.06798	0.0193209	0.276554
TRIM9	0.785977	5.96817	1.19965e-09	1.48992e-08	0.725611	FALSE	0.42469	3.15685	0.00079743	0.0112045	0.309182	2.31388	0.0103372	0.16559
GLRA1	0.838288	5.96674	1.21022e-09	1.5021e-08	0.579155	FALSE	0.681149	4.56167	2.53739e-06	4.78761e-05	0.109991	0.736902	0.230591	0.50035
BAIAP2L1	0.687757	5.9629	1.239e-09	1.53601e-08	1.65179	FALSE	0.152752	1.21454	0.112271	0.497983	0.405038	3.24252	0.000592381	0.0126626
ZFP608	0.407192	5.96289	1.23911e-09	1.53601e-08	2.45623	FALSE	0.273493	3.75704	8.59663e-05	0.00138499	0.0540275	0.743265	0.228661	0.50035
GSN	0.788584	5.95524	1.29847e-09	1.60858e-08	1.02835	FALSE	0.0584536	0.400066	0.344554	0.497983	0.624351	4.30091	8.50483e-06	0.000234726
GABRG1	0.805221	5.95474	1.30243e-09	1.61247e-08	0.82777	FALSE	0.530147	3.61189	0.000151985	0.00236136	0.126768	0.868071	0.192678	0.50035
TMCC3	0.664773	5.95282	1.31781e-09	1.63048e-08	1.20845	FALSE	0.400391	3.40357	0.000332552	0.00492503	0.135274	1.14749	0.125589	0.50035
CENPV	0.653505	5.95234	1.32167e-09	1.63422e-08	1.98674	FALSE	0.423678	3.64034	0.000136141	0.0021253	0.0816146	0.700033	0.241953	0.50035
CD63	0.700352	5.95021	1.33902e-09	1.65463e-08	2.39775	FALSE	0.625792	4.9939	2.95866e-07	6.11779e-06	0.137347	1.09548	0.136654	0.50035
PEA15A	0.761189	5.95004	1.3404e-09	1.65529e-08	2.05047	FALSE	0.496382	3.5992	0.000159598	0.00246986	0.203736	1.47669	0.0698795	0.50035
ARSI	0.728918	5.9423	1.40525e-09	1.73429e-08	0.961737	FALSE	0.468139	3.5873	0.00016706	0.00257115	0.265148	2.03681	0.0208345	0.29455
TLL1	0.81064	5.94082	1.41802e-09	1.74895e-08	0	FALSE	0.304249	2.08651	0.0184662	0.192541	0.193382	1.3339	0.0911185	0.50035
MAGED2	0.665402	5.93459	1.47293e-09	1.81554e-08	1.93211	FALSE	0.416521	3.49963	0.00023295	0.00351359	0.121569	1.02056	0.153732	0.50035
PAX9	0.714533	5.93279	1.48913e-09	1.83435e-08	0.600981	FALSE	0.179583	1.36578	0.0860033	0.497983	0.448735	3.42629	0.000305946	0.00692454
PDE1B	0.773107	5.93008	1.51394e-09	1.86374e-08	1.06387	FALSE	0.335058	2.37608	0.00874873	0.100161	0.36642	2.60012	0.00465949	0.0833099
NUDT19	0.662629	5.92908	1.52318e-09	1.87395e-08	2.13287	FALSE	0.336213	2.79467	0.00259765	0.0335353	0.212872	1.77147	0.0382411	0.47136
TFDP2	0.680759	5.92424	1.56871e-09	1.92875e-08	2.45565	FALSE	0.386082	3.13536	0.000858213	0.0119948	0.260474	2.11179	0.0173521	0.253537
SLC38A8	0.761403	5.92187	1.59148e-09	1.95551e-08	0.557763	FALSE	0.500123	3.58147	0.000170836	0.00262721	0.149782	1.073	0.141637	0.50035
RNF220	0.788306	5.92174	1.59275e-09	1.95585e-08	2.29254	FALSE	0.620148	4.36323	6.40772e-06	0.000116533	0.0752071	0.529575	0.298203	0.50035
GNAO1	0.703152	5.9131	1.67865e-09	2.06005e-08	1.53826	FALSE	0.230465	1.78644	0.0370138	0.344228	0.430417	3.34595	0.000410001	0.00904865
IRF2BP2	0.726609	5.90965	1.71419e-09	2.10234e-08	2.04819	FALSE	0.423696	3.20213	0.000682069	0.00972692	0.226038	1.71311	0.043346	0.50035
C030018K13RIK	0.674254	5.90046	1.8124e-09	2.22141e-08	1.07648	FALSE	0.273266	2.23535	0.0126972	0.138575	0.154696	1.2673	0.102524	0.50035
SERTAD4	0.757501	5.8963	1.85867e-09	2.2767e-08	0.955806	FALSE	0.407423	2.94196	0.00163072	0.0218727	0.121904	0.882006	0.188887	0.50035
AIG1	0.767957	5.89355	1.88987e-09	2.31347e-08	2.1063	FALSE	0.490667	3.52429	0.000212312	0.00321466	0.309526	2.22237	0.013129	0.20238
ZFP462	0.482114	5.88753	1.96008e-09	2.39792e-08	2.65657	FALSE	0.329937	3.81296	6.86564e-05	0.00112646	0.0890267	1.03056	0.151375	0.50035
UNC5A	0.805897	5.88728	1.96303e-09	2.40003e-08	0.665388	FALSE	0.705282	4.8051	7.73355e-07	1.52212e-05	0.0543624	0.37071	0.355427	0.50035
DPYSL5	0.692893	5.88012	2.04978e-09	2.50454e-08	2.12105	FALSE	0.406832	3.26087	0.00055536	0.00802491	0.196843	1.57581	0.0575353	0.50035
PRC1	0.174753	5.87339	2.13492e-09	2.60694e-08	3.17984	FALSE	0.0344836	1.08413	0.139153	0.497983	0.0469421	1.47602	0.0699697	0.50035
TCEAL6	0.85895	5.87222	2.15002e-09	2.62375e-08	1.17952	FALSE	0.790336	5.04456	2.27285e-07	4.76497e-06	0.0430498	0.274669	0.391785	0.50035
POU5F1	0.795281	5.86971	2.18281e-09	2.66211e-08	1.22324	FALSE	0.713539	4.95185	3.67554e-07	7.49741e-06	0.107506	0.744503	0.228286	0.50035
KDM7A	0.501828	5.86504	2.24508e-09	2.73635e-08	2.16667	FALSE	0.381599	4.1691	1.52903e-05	0.000268374	0.0621243	0.677745	0.248967	0.50035
INSIG1	0.550939	5.86039	2.30895e-09	2.81245e-08	1.74769	FALSE	0.242056	2.40509	0.0080843	0.0934815	0.178988	1.7785	0.0376607	0.466845
AU020206	0.458692	5.86006	2.31354e-09	2.81629e-08	1.94739	FALSE	0.337015	4.0674	2.37701e-05	0.000407372	0.112566	1.36042	0.0868492	0.50035
SFRP5	0.771507	5.85992	2.31543e-09	2.81684e-08	0.770733	FALSE	0.376707	2.84336	0.00223207	0.0292194	0.0480862	0.359306	0.359683	0.50035
LRRC36	0.837491	5.83266	2.7276e-09	3.31621e-08	0.692296	FALSE	0.389912	2.50495	0.0061235	0.072737	0.335949	2.15689	0.0155072	0.231757
DAB2	0.680932	5.82962	2.77763e-09	3.37495e-08	1.73296	FALSE	0.0373145	0.295221	0.383912	0.497983	0.356986	2.83855	0.00226598	0.0441562
CMTM7	0.678494	5.82756	2.81212e-09	3.41474e-08	2.06206	FALSE	0.397561	3.1776	0.00074251	0.0104973	0.231941	1.85049	0.0321218	0.414416
FGB	0.763548	5.82401	2.87258e-09	3.486e-08	0	FALSE	0.1408	0.981412	0.163195	0.497983	0.102693	0.720912	0.235482	0.50035
TMEM88	0.809299	5.8197	2.9477e-09	3.57495e-08	1.52389	FALSE	0.684849	4.64421	1.70691e-06	3.28058e-05	0.116809	0.79404	0.213586	0.50035
MEGF11	0.787729	5.81261	3.0753e-09	3.7274e-08	0.606014	FALSE	0.240517	1.61238	0.0534401	0.465655	0.0534739	0.358809	0.359869	0.50035
CBFA2T3	0.785995	5.80592	3.20071e-09	3.87563e-08	0.881038	FALSE	0.453043	3.21704	0.000647597	0.00924875	0.103865	0.741194	0.229288	0.50035
DAB1	0.64039	5.80587	3.20155e-09	3.87563e-08	1.96596	FALSE	0.251177	2.11408	0.0172542	0.181156	0.113487	0.956618	0.16938	0.50035
TMEM159	0.750653	5.80259	3.26494e-09	3.94993e-08	1.4596	FALSE	0.331666	2.60181	0.00463671	0.0567599	0.260389	2.06224	0.0195922	0.2792
HOXB4	0.659263	5.79948	3.3261e-09	4.02144e-08	0	FALSE	0.244464	2.15721	0.0154945	0.164447	0.0106288	0.0922906	0.463234	0.50035
SLC1A5	0.699417	5.79533	3.40933e-09	4.11954e-08	1.78097	FALSE	0.297189	2.30674	0.0105345	0.117521	0.310515	2.40714	0.00803896	0.133009
CLIC1	0.466608	5.79353	3.44601e-09	4.16129e-08	2.86333	FALSE	0.295408	3.46884	0.000261354	0.00392344	0.0953123	1.11725	0.131943	0.50035
RAPH1	0.582795	5.78327	3.6632e-09	4.42085e-08	2.28141	FALSE	0.515871	4.82298	7.07146e-07	1.39461e-05	0.0572904	0.536265	0.295888	0.50035
MCC	0.716399	5.77264	3.90205e-09	4.7062e-08	1.20077	FALSE	0.338346	2.58765	0.00483169	0.0588896	0.129988	0.997393	0.159287	0.50035
TCEAL8	0.736955	5.77187	3.91977e-09	4.72467e-08	3.41945	FALSE	0.622379	4.56029	2.55414e-06	4.8146e-05	0.041957	0.307637	0.379179	0.50035
IFNGR1	0.811598	5.76833	4.00316e-09	4.82222e-08	1.01673	FALSE	0.340135	2.20735	0.0136447	0.147439	0.548144	3.55971	0.000185632	0.00435204
IGSF3	0.6533	5.76541	4.07291e-09	4.90324e-08	1.53782	FALSE	0.478993	3.96558	3.66089e-05	0.000618223	0.0792587	0.657217	0.255521	0.50035
PGM2	0.801272	5.76399	4.10735e-09	4.94167e-08	1.72345	FALSE	0.621562	4.18421	1.43079e-05	0.000251807	0.137781	0.929652	0.176276	0.50035
SEMA5B	0.733274	5.75771	4.26303e-09	5.12583e-08	1.39286	FALSE	0.549448	4.02583	2.83872e-05	0.000482287	0.0258725	0.189287	0.424934	0.50035
PJA1	0.84834	5.75045	4.45023e-09	5.34763e-08	2.36496	FALSE	0.68366	4.35497	6.65425e-06	0.000120792	0.0461181	0.2938	0.384456	0.50035
GPSM3	0.833055	5.74933	4.47993e-09	5.38003e-08	0.957234	FALSE	0.229983	1.44069	0.0748359	0.497983	0.645604	4.06693	2.38181e-05	0.000624842
MLLT10	0.70563	5.74785	4.51934e-09	5.42403e-08	2.55099	FALSE	0.621511	4.74703	1.03211e-06	2.01724e-05	0.0273524	0.209055	0.417203	0.50035
CARD19	0.692551	5.74354	4.63579e-09	5.56039e-08	1.26817	FALSE	0.102223	0.773323	0.219666	0.497983	0.560581	4.25441	1.04801e-05	0.000287223
SOX4	0.798475	5.73467	4.88506e-09	5.8558e-08	3.11582	FALSE	0.220604	1.48258	0.0690931	0.497983	0.583163	3.92122	4.40516e-05	0.00112117
MYH9	0.345404	5.73305	4.93202e-09	5.90849e-08	2.35637	FALSE	0.148086	2.31304	0.0103601	0.115838	0.0961527	1.50496	0.0661666	0.50035
ATP8A2	0.73856	5.72192	5.26628e-09	6.30508e-08	0.851405	FALSE	0.63629	4.60427	2.06958e-06	3.95436e-05	0.0663673	0.480793	0.315332	0.50035
CCKAR	0.876262	5.72096	5.29632e-09	6.33718e-08	0	FALSE	0.128167	0.747598	0.227351	0.497983	0.715022	4.21365	1.25636e-05	0.000340048
RGS17	0.819002	5.71211	5.57915e-09	6.67152e-08	1.43225	FALSE	0.67514	4.44946	4.30433e-06	7.93088e-05	0.0551849	0.363497	0.358117	0.50035
TNS3	0.686457	5.71135	5.60418e-09	6.69737e-08	1.58592	FALSE	0.0295007	0.227505	0.410016	0.497983	0.525568	4.07498	2.30088e-05	0.000606916
GDPD2	0.82511	5.711	5.61568e-09	6.70703e-08	1.11893	FALSE	0.65524	4.19377	1.37179e-05	0.000241639	0.125459	0.804654	0.21051	0.50035
TRP63	0.805071	5.70982	5.65489e-09	6.74976e-08	0	FALSE	0.0883827	0.565316	0.285929	0.497983	0.714706	4.59213	2.19371e-06	6.50259e-05
LMO4	0.832727	5.70847	5.69985e-09	6.79928e-08	3.01887	FALSE	0.468543	2.98462	0.00141965	0.0193055	0.339565	2.15865	0.0154388	0.230911
RFX3	0.44688	5.70779	5.72254e-09	6.82219e-08	2.03595	FALSE	0.0260919	0.30862	0.378805	0.497983	0.310939	3.68577	0.000114006	0.00276189
LRIG1	0.573548	5.70498	5.81799e-09	6.93178e-08	1.49992	FALSE	0.408733	3.81532	6.80033e-05	0.00111761	0.0597505	0.557803	0.288489	0.50035
ST8SIA3	0.564765	5.70235	5.9082e-09	7.03499e-08	1.70707	FALSE	0.411646	3.89822	4.8452e-05	0.000810549	0.0743171	0.703184	0.240971	0.50035
CNTFR	0.741379	5.70018	5.98418e-09	7.12114e-08	2.15891	FALSE	0.349397	2.53047	0.00569541	0.068064	0.256209	1.85906	0.0315096	0.40732
GPX7	0.702552	5.69868	6.0369e-09	7.17952e-08	1.61226	FALSE	0.333813	2.49321	0.00632971	0.074734	0.374084	2.79793	0.0025716	0.0491357
GUCA1A	0.729519	5.69843	6.04587e-09	7.18583e-08	1.16037	FALSE	0.496083	3.65965	0.000126282	0.0019872	0.298158	2.20406	0.01376	0.210454
TNFAIP3	0.77361	5.68782	6.43359e-09	7.64203e-08	0.714389	FALSE	0.636199	4.28514	9.13135e-06	0.000163938	0.169688	1.14295	0.12653	0.50035
PKP2	0.785637	5.68754	6.44428e-09	7.65009e-08	1.42032	FALSE	0.134595	0.898897	0.184354	0.497983	0.573384	3.84532	6.0198e-05	0.00151045
PRTN3	0.806268	5.67878	6.78303e-09	8.04736e-08	0.732463	FALSE	0.0913933	0.587282	0.278507	0.497983	0.564235	3.64264	0.000134927	0.00322495
DDAH2	0.477745	5.67108	7.09509e-09	8.4125e-08	2.88406	FALSE	0.226924	2.55726	0.00527505	0.0635435	0.240878	2.71165	0.00334742	0.0619098
5730559C18RIK	0.790339	5.66396	7.39573e-09	8.76368e-08	1.55665	FALSE	0.681729	4.58251	2.29718e-06	4.35658e-05	0.0382695	0.257628	0.398347	0.50035
CORIN	0.769061	5.65765	7.67317e-09	9.08694e-08	0	FALSE	0.0463226	0.305084	0.380151	0.497983	0.65467	4.39326	5.58319e-06	0.000157639
NUP62CL	0.740145	5.65416	7.83062e-09	9.26781e-08	1.44245	FALSE	0.378249	2.78681	0.00266149	0.0342469	0.202308	1.49358	0.0676429	0.50035
CAMK1D	0.762587	5.65143	7.95578e-09	9.41026e-08	0.848862	FALSE	0.365943	2.51187	0.00600472	0.0715426	0.301463	2.07776	0.0188656	0.271511
CRYBG3	0.62307	5.63313	8.84826e-09	1.04596e-07	1.15065	FALSE	0.513984	4.36459	6.36802e-06	0.000115918	0.0682496	0.579545	0.281111	0.50035
FAM162B	0.87576	5.62217	9.42885e-09	1.11392e-07	0.76763	FALSE	0.826845	4.93104	4.08956e-07	8.32385e-06	0.0381095	0.227061	0.410188	0.50035
APPL1	0.749582	5.61738	9.69397e-09	1.14455e-07	2.26413	FALSE	0.589514	4.13024	1.81193e-05	0.000316049	0.0696172	0.488131	0.312729	0.50035
SLC32A1	0.851716	5.61239	9.97783e-09	1.17711e-07	0.631097	FALSE	0.654287	3.99856	3.18642e-05	0.000539026	0.0983141	0.599813	0.274316	0.50035
DCC	0.667154	5.61232	9.98171e-09	1.17711e-07	1.03548	FALSE	0.229909	1.85351	0.0319044	0.304652	0.334801	2.71218	0.00334209	0.0618697
MALL	0.810069	5.61003	1.01146e-08	1.19207e-07	0.44016	FALSE	0.226823	1.39742	0.0811435	0.497983	0.0413289	0.255747	0.399073	0.50035
AGPAT2	0.802068	5.60242	1.05688e-08	1.24484e-07	1.2698	FALSE	0.624762	4.06209	2.43172e-05	0.000416021	0.12466	0.812529	0.208244	0.50035
SMPD3	0.743061	5.59784	1.08519e-08	1.27743e-07	1.20048	FALSE	0.584443	4.06584	2.39296e-05	0.000409747	0.049739	0.346468	0.364496	0.50035
VAT1	0.809272	5.59674	1.09212e-08	1.28481e-07	1.42602	FALSE	0.269204	1.69169	0.0453528	0.407676	0.148702	0.936029	0.174629	0.50035
RORA	0.711	5.59437	1.10715e-08	1.30172e-07	1.422	FALSE	0.182835	1.3084	0.0953696	0.497983	0.487679	3.49967	0.00023292	0.00535824
CACNA2D3	0.765291	5.59259	1.11854e-08	1.31431e-07	0.644996	FALSE	0.450442	3.06524	0.00108747	0.015049	0.34774	2.37002	0.00889349	0.144587
PLK2	0.761538	5.59167	1.12446e-08	1.32048e-07	0.894901	FALSE	0.370534	2.49499	0.00629812	0.0744955	0.324759	2.18839	0.0143207	0.217336
PHACTR1	0.781	5.59066	1.13102e-08	1.3274e-07	1.41625	FALSE	0.0638134	0.413164	0.339743	0.497983	0.655147	4.26077	1.01862e-05	0.00027995
DECR1	0.719654	5.5869	1.15578e-08	1.35563e-07	2.01511	FALSE	0.0360505	0.257262	0.398488	0.497983	0.633202	4.53798	2.83979e-06	8.3546e-05
ZFP385A	0.671001	5.58235	1.18642e-08	1.39075e-07	1.56879	FALSE	0.502877	3.89932	4.82323e-05	0.000808251	0.281678	2.1792	0.0146586	0.221606
MICAL1	0.788002	5.58015	1.20158e-08	1.40768e-07	1.40453	FALSE	0.344177	2.25248	0.0121459	0.133151	0.200302	1.31445	0.0943471	0.50035
GPC6	0.477823	5.56849	1.2848e-08	1.50428e-07	2.39181	FALSE	0.355096	3.88572	5.10135e-05	0.000851222	0.0674416	0.737125	0.230523	0.50035
SLC9B2	0.836753	5.56413	1.31733e-08	1.54144e-07	1.05028	FALSE	0.677856	4.20185	1.32371e-05	0.000233799	0.0720913	0.446608	0.327579	0.50035
EPHB3	0.771039	5.55729	1.37001e-08	1.60213e-07	1.32825	FALSE	0.195383	1.31199	0.0947618	0.497983	0.502395	3.38152	0.000360435	0.00800998
SOGA3	0.698753	5.55624	1.37826e-08	1.61082e-07	1.95695	FALSE	0.199371	1.44406	0.0743605	0.497983	0.0398557	0.288826	0.386357	0.50035
NECTIN1	0.54551	5.54304	1.48636e-08	1.73612e-07	1.90959	FALSE	0.38065	3.64368	0.000134382	0.00210117	0.123313	1.18181	0.118641	0.50035
FXYD6	0.607811	5.53295	1.57445e-08	1.83792e-07	2.56909	FALSE	0.0938414	0.802031	0.211268	0.497983	0.445652	3.81324	6.8579e-05	0.00170777
FBLIM1	0.768953	5.53234	1.57991e-08	1.8432e-07	0.984154	FALSE	0.238265	1.59533	0.0553196	0.478632	0.43943	2.95709	0.00155278	0.0314126
HEY1	0.745253	5.52195	1.67633e-08	1.95452e-07	1.41427	FALSE	0.118418	0.827061	0.204101	0.497983	0.502157	3.51903	0.000216567	0.00502329
SEMA6D	0.626544	5.50761	1.8187e-08	2.11926e-07	1.27902	FALSE	0.434288	3.52897	0.000208586	0.00316803	0.318444	2.59279	0.00476005	0.0849149
CEND1	0.776841	5.50605	1.83492e-08	2.13689e-07	1.03507	FALSE	0.688328	4.57438	2.38815e-06	4.51471e-05	0.0979262	0.65131	0.257423	0.50035
C1S1	0.824413	5.4989	1.91081e-08	2.22395e-07	0	FALSE	0.0525086	0.313272	0.377037	0.497983	0.768914	4.59528	2.16085e-06	6.42459e-05
ASB4	0.751219	5.4984	1.91623e-08	2.22894e-07	1.31655	FALSE	0.28579	2.00575	0.0224412	0.227578	0.370656	2.60783	0.00455587	0.081868
RB1	0.598154	5.4939	1.96576e-08	2.2852e-07	1.5662	FALSE	0.415358	3.54098	0.000199323	0.00304145	0.036379	0.309914	0.378313	0.50035
HES6	0.681112	5.4908	2.00053e-08	2.32424e-07	1.77149	FALSE	0.389542	3.15735	0.000796045	0.0111977	0.234507	1.91421	0.0277963	0.371053
TCF15	0.720497	5.49028	2.00646e-08	2.32975e-07	1.11028	FALSE	0.291408	2.16382	0.0152391	0.162255	0.0445115	0.328702	0.37119	0.50035
HMGCLL1	0.772669	5.49004	2.00916e-08	2.3315e-07	1.09472	FALSE	0.666753	4.46538	3.99632e-06	7.37029e-05	0.141969	0.953324	0.170213	0.50035
CRIP1	0.805619	5.48453	2.07288e-08	2.40403e-07	1.45546	FALSE	0.500874	3.15676	0.000797673	0.0112045	0.390877	2.46837	0.00678655	0.115002
CORO2B	0.793114	5.47892	2.13967e-08	2.48002e-07	1.26239	FALSE	0.527333	3.35269	0.000400146	0.00587289	0.294779	1.87673	0.0302779	0.394779
A330008L17RIK	0.726051	5.46392	2.3286e-08	2.69741e-07	0.686268	FALSE	0.40282	2.86247	0.00210175	0.0276056	0.22677	1.60974	0.053727	0.50035
KCNQ4	0.821505	5.46346	2.33472e-08	2.7029e-07	0.628942	FALSE	0.495444	3.021	0.00125971	0.01725	0.062614	0.381974	0.35124	0.50035
UNC119	0.548368	5.45533	2.44415e-08	2.82792e-07	2.36933	FALSE	0.445557	4.12841	1.82644e-05	0.000318296	0.111347	1.03025	0.151446	0.50035
PDPN	0.804754	5.44711	2.55979e-08	2.95997e-07	1.33098	FALSE	0.568061	3.61809	0.000148391	0.00230736	0.14251	0.906927	0.182223	0.50035
CYBA	0.484595	5.43824	2.69052e-08	3.10931e-07	2.27772	FALSE	0.263703	2.76351	0.00285914	0.0365743	0.0733601	0.768036	0.221233	0.50035
ELOVL4	0.783748	5.43429	2.7507e-08	3.17699e-07	1.60507	FALSE	0.696808	4.52911	2.96163e-06	5.52959e-05	0.0296777	0.193048	0.423461	0.50035
POU2F2	0.694252	5.43279	2.77401e-08	3.20203e-07	1.33341	FALSE	0.552747	4.06766	2.37437e-05	0.000407275	0.0918374	0.675561	0.24966	0.50035
PLEC	0.568099	5.43206	2.78532e-08	3.21319e-07	1.6153	FALSE	0.294643	2.65239	0.00399622	0.0495688	0.220874	1.98979	0.023307	0.321401
NFATC2	0.851132	5.41233	3.11054e-08	3.58626e-07	0.521553	FALSE	0.0982425	0.566861	0.285404	0.497983	0.782316	4.5297	2.95332e-06	8.6368e-05
PRRX1	0.678833	5.4038	3.26213e-08	3.75882e-07	1.24674	FALSE	0.213112	1.58864	0.0560708	0.483426	0.0891831	0.667053	0.252369	0.50035
FAM171A1	0.757538	5.40284	3.2797e-08	3.77685e-07	1.41334	FALSE	0.140818	0.931558	0.175782	0.497983	0.585266	3.88011	5.2204e-05	0.00132181
RAB38	0.814957	5.40205	3.29415e-08	3.79126e-07	1.27209	FALSE	0.550326	3.44675	0.000283687	0.00423652	0.270553	1.6943	0.0451044	0.50035
NUMA1	0.460359	5.38214	3.68026e-08	4.23317e-07	2.25319	FALSE	0.0624574	0.684099	0.246956	0.497983	0.346577	3.79943	7.25136e-05	0.00180118
CLIP3	0.781165	5.38195	3.68409e-08	4.23508e-07	2.02984	FALSE	0.132275	0.837485	0.20116	0.497983	0.583646	3.70861	0.000104202	0.00254639
AMPH	0.743849	5.37627	3.80226e-08	4.36837e-07	1.21333	FALSE	0.154363	1.0311	0.151246	0.497983	0.579307	3.88067	5.20844e-05	0.00132048
PLPP2	0.707845	5.37186	3.89646e-08	4.47397e-07	1.23859	FALSE	0.543029	3.80904	6.97531e-05	0.00114159	0.0850104	0.596556	0.275402	0.50035
PODXL	0.473829	5.35851	4.19548e-08	4.8145e-07	2.02233	FALSE	0.223117	2.3833	0.00857906	0.0984485	0.176277	1.88398	0.0297841	0.389893
IER2	0.655004	5.3581	4.20512e-08	4.82274e-07	2.67812	FALSE	0.485332	3.7127	0.000102529	0.00163173	0.109946	0.839966	0.200464	0.50035
TPD52L1	0.762827	5.35642	4.24432e-08	4.86486e-07	1.47546	FALSE	0.160582	1.09498	0.136763	0.497983	0.489117	3.33892	0.000420521	0.00925099
ELAVL2	0.560449	5.35015	4.39395e-08	5.03342e-07	2.27706	FALSE	0.158852	1.43877	0.0751079	0.497983	0.0518482	0.47031	0.319067	0.50035
RSPO3	0.698975	5.34732	4.46327e-08	5.10984e-07	1.00848	FALSE	0.401292	2.95657	0.00155539	0.0209625	0.247348	1.82266	0.0341773	0.435293
RXRG	0.808299	5.34682	4.47554e-08	5.1209e-07	0.969627	FALSE	0.515338	3.27261	0.000532796	0.00772732	0.132262	0.839037	0.200724	0.50035
TMEM51	0.824077	5.34349	4.55866e-08	5.21297e-07	0.803471	FALSE	0.619646	3.74145	9.14823e-05	0.00146666	0.161891	0.978878	0.16382	0.50035
ART5	0.777858	5.34034	4.63854e-08	5.30123e-07	0.867073	FALSE	0.139322	0.880014	0.189426	0.497983	0.584169	3.70557	0.000105457	0.00257066
CCDC190	0.82364	5.33549	4.76424e-08	5.44172e-07	0.923997	FALSE	0.59182	3.56727	0.000180358	0.00276497	0.345622	2.07926	0.0187966	0.271099
MKNK1	0.80678	5.33534	4.76839e-08	5.44328e-07	1.29585	FALSE	0.621381	3.81449	6.82317e-05	0.00112043	0.125584	0.770295	0.220563	0.50035
LURAP1L	0.785566	5.32857	4.94959e-08	5.64684e-07	0.84518	FALSE	0.297195	1.82883	0.0337123	0.318812	0.575682	3.55726	0.000187369	0.00438752
SLC25A33	0.632461	5.32483	5.05227e-08	5.76065e-07	1.84469	FALSE	0.0732697	0.573811	0.283048	0.497983	0.352027	2.76079	0.00288306	0.0543983
ETV2	0.754312	5.32014	5.18426e-08	5.90771e-07	1.1807	FALSE	0.56461	3.69712	0.00010903	0.00173239	0.129596	0.848149	0.198178	0.50035
RAB3C	0.829845	5.31711	5.27138e-08	6.00349e-07	0.845275	FALSE	0.689885	4.08977	2.15903e-05	0.000372618	0.0398246	0.235766	0.406807	0.50035
HACD4	0.7625	5.31367	5.37187e-08	6.11439e-07	1.05524	FALSE	0.568491	3.7914	7.49004e-05	0.00121771	0.108983	0.728131	0.233267	0.50035
DAPK1	0.546382	5.31264	5.40245e-08	6.14292e-07	1.79484	FALSE	0.356936	3.24516	0.000586921	0.00845606	0.0558032	0.506541	0.306238	0.50035
DCAF12L1	0.758531	5.31255	5.40497e-08	6.14292e-07	1.48867	FALSE	0.60595	3.96844	3.61716e-05	0.000611365	0.229515	1.49972	0.0668439	0.50035
KCNJ2	0.763364	5.31251	5.40632e-08	6.14292e-07	0.746018	FALSE	0.468458	3.02567	0.00124041	0.0170095	0.339097	2.18851	0.0143162	0.217336
ARVCF	0.662056	5.3072	5.56596e-08	6.32065e-07	1.85214	FALSE	0.180203	1.32647	0.0923416	0.497983	0.498331	3.68241	0.00011552	0.00279513
MFAP4	0.79546	5.30491	5.63656e-08	6.39712e-07	1.24676	FALSE	0.210802	1.29143	0.0982779	0.497983	0.409098	2.51635	0.00592893	0.102689
DLEU7	0.819094	5.30339	5.68346e-08	6.44662e-07	1.03845	FALSE	0.535261	3.28497	0.000509961	0.00741256	0.281386	1.73002	0.0418134	0.50035
GRINA	0.73268	5.30267	5.70594e-08	6.46839e-07	1.57697	FALSE	0.232927	1.56551	0.0587319	0.497983	0.313281	2.11296	0.0173022	0.252996
ADCY5	0.768151	5.3025	5.71148e-08	6.47092e-07	0.640715	FALSE	0.173104	1.09033	0.137783	0.497983	0.266143	1.68022	0.0464568	0.50035
ZFP663	0.769958	5.29776	5.86174e-08	6.63732e-07	0.728607	FALSE	0.085288	0.528647	0.298525	0.497983	0.687267	4.30177	8.47179e-06	0.000234144
BMP2	0.693321	5.29354	5.99851e-08	6.78828e-07	0.5693	FALSE	0.119815	0.980494	0.163421	0.497983	0.0304928	0.249502	0.401486	0.50035
SPOCK1	0.789104	5.29098	6.08309e-08	6.88003e-07	0.499668	FALSE	0.13502	0.816932	0.206984	0.497983	0.595241	3.60729	0.000154705	0.0036664
FGFR1	0.688021	5.28876	6.15732e-08	6.95997e-07	2.74233	FALSE	0.25985	1.86864	0.0308367	0.296042	0.296043	2.12988	0.0165908	0.244415
GABRA4	0.797773	5.28681	6.22337e-08	7.03058e-07	1.27137	FALSE	0.54555	3.36795	0.00037865	0.00556991	0.184494	1.13908	0.127335	0.50035
ANK2	0.423065	5.28539	6.27174e-08	7.08115e-07	2.30002	FALSE	0.198842	2.33227	0.00984324	0.110832	0.130235	1.52989	0.0630215	0.50035
ZPLD1	0.776312	5.2823	6.37846e-08	7.1975e-07	0	FALSE	0.0474261	0.289571	0.386072	0.497983	0.717235	4.4086	5.20216e-06	0.000147517
EGFL7	0.607354	5.28115	6.41871e-08	7.23876e-07	1.96631	FALSE	0.352714	2.85886	0.00212585	0.0279033	0.0693068	0.561655	0.287176	0.50035
KLHL21	0.670203	5.27699	6.56626e-08	7.4009e-07	1.57372	FALSE	0.624203	4.64004	1.7417e-06	3.34416e-05	0.0397808	0.296066	0.38359	0.50035
MAP1B	0.866339	5.27493	6.64039e-08	7.48016e-07	3.55303	FALSE	0.432808	2.44802	0.00718219	0.0838906	0.438304	2.48093	0.00655195	0.111605
CACNB2	0.729853	5.27449	6.65641e-08	7.4939e-07	1.25605	FALSE	0.411537	2.72923	0.00317416	0.0401848	0.281578	1.8714	0.0306451	0.398222
BNC2	0.803755	5.25951	7.22181e-08	8.12577e-07	0.419089	FALSE	0.302266	1.84123	0.0327936	0.31194	0.0199668	0.121744	0.451551	0.50035
CSN3	0.724335	5.25789	7.28596e-08	8.19326e-07	0.431081	FALSE	0.395749	2.68652	0.00361005	0.0452732	0.0710442	0.481897	0.31494	0.50035
JARID2	0.355348	5.25482	7.40836e-08	8.32614e-07	2.89578	FALSE	0.178782	2.48492	0.00647904	0.0763135	0.0541715	0.753039	0.225713	0.50035
NRBP2	0.818371	5.2529	7.4862e-08	8.40879e-07	0.974812	FALSE	0.0956394	0.557099	0.28873	0.497983	0.68366	4.00749	3.06831e-05	0.000793273
PLEKHA7	0.558181	5.24146	7.96553e-08	8.94208e-07	1.82068	FALSE	0.298238	2.62172	0.00437431	0.0538501	0.0465662	0.408884	0.341312	0.50035
RGS6	0.738222	5.23675	8.17136e-08	9.16791e-07	0.527062	FALSE	0.483479	3.19756	0.00069298	0.00986101	0.25742	1.69431	0.0451035	0.50035
TMEM185A	0.790242	5.23619	8.19616e-08	9.19047e-07	1.54969	FALSE	0.547489	3.47203	0.000258267	0.00388052	0.0954198	0.604793	0.272658	0.50035
CDCA7L	0.727736	5.22382	8.76362e-08	9.82116e-07	2.05942	FALSE	0.419073	2.82825	0.00234019	0.030452	0.196374	1.32574	0.0924624	0.50035
TTC32	0.77784	5.22346	8.78061e-08	9.83459e-07	1.92854	FALSE	0.655104	4.08547	2.19935e-05	0.000379244	0.101845	0.634958	0.262728	0.50035
PPP1R14C	0.79599	5.22236	8.83266e-08	9.88723e-07	0.88737	FALSE	0.0733238	0.436718	0.331158	0.497983	0.67967	4.06951	2.35559e-05	0.000620115
PMVK	0.649718	5.21614	9.13471e-08	1.02195e-06	2.15996	FALSE	0.45233	3.3823	0.000359412	0.0053068	0.121252	0.907216	0.182146	0.50035
ADGRD1	0.843035	5.21001	9.44178e-08	1.0557e-06	0	FALSE	0.0532545	0.305694	0.379919	0.497983	0.801596	4.64051	1.73777e-06	5.19031e-05
GM11627	0.768517	5.20889	9.49846e-08	1.06144e-06	1.36531	FALSE	0.182951	1.16962	0.121077	0.497983	0.548092	3.51066	0.000223494	0.00516564
COL16A1	0.628752	5.20798	9.54527e-08	1.06606e-06	0.596516	FALSE	0.116234	1.0666	0.143075	0.497983	0.0618779	0.582688	0.280052	0.50035
C77370	0.724679	5.20126	9.89694e-08	1.10471e-06	0.880068	FALSE	0.529492	3.48892	0.000242488	0.00365183	0.0486598	0.321046	0.374088	0.50035
SPRED2	0.522241	5.19966	9.98291e-08	1.11367e-06	1.79233	FALSE	0.315992	2.93613	0.00166166	0.0222268	0.0921569	0.857302	0.195639	0.50035
GPATCH4	0.723785	5.19539	1.02146e-07	1.13887e-06	2.6633	FALSE	0.124009	0.819465	0.206261	0.497983	0.523474	3.46321	0.000266886	0.00608258
GLI2	0.633531	5.19311	1.03407e-07	1.15227e-06	1.59501	FALSE	0.0445783	0.341755	0.366268	0.497983	0.442967	3.40605	0.000329556	0.00742466
GXYLT2	0.803055	5.18933	1.05524e-07	1.1752e-06	0.81475	FALSE	0.570755	3.4384	0.000292583	0.00436604	0.183814	1.10876	0.133767	0.50035
CRB2	0.6171	5.18719	1.06748e-07	1.18815e-06	1.74118	FALSE	0.179885	1.42102	0.0776551	0.497983	0.355447	2.81517	0.00243754	0.0470528
MAPRE3	0.753404	5.18165	1.09964e-07	1.22326e-06	1.06956	FALSE	0.0791949	0.494242	0.310568	0.497983	0.642491	4.02374	2.86405e-05	0.000741441
B4GALNT1	0.837858	5.18127	1.10193e-07	1.22511e-06	1.23583	FALSE	0.755371	4.35	6.80694e-06	0.000123222	0.023876	0.13741	0.445353	0.50035
GRIK2	0.750747	5.17108	1.16373e-07	1.29308e-06	0.703762	FALSE	0.547172	3.49462	0.000237373	0.00357755	0.13865	0.888578	0.187115	0.50035
SNAI1	0.711023	5.15693	1.25515e-07	1.39388e-06	0.99149	FALSE	0.131796	0.995881	0.159654	0.497983	0.100385	0.761257	0.223252	0.50035
TGFBI	0.799366	5.15312	1.28091e-07	1.42127e-06	0.776855	FALSE	0.377624	2.27661	0.0114046	0.125845	0.395063	2.39113	0.00839835	0.137448
RHOD	0.69842	5.15307	1.28127e-07	1.42127e-06	1.20227	FALSE	0.312509	2.1205	0.016982	0.178488	0.366161	2.48701	0.00644106	0.110098
UNCX	0.682028	5.14998	1.30257e-07	1.44409e-06	0.531151	FALSE	0.270392	2.17089	0.0149698	0.159996	0.134622	1.09344	0.137101	0.50035
RTN2	0.774744	5.14963	1.305e-07	1.44596e-06	1.47128	FALSE	0.0977206	0.590413	0.277457	0.497983	0.669347	4.06933	2.35747e-05	0.000620115
4932438H23RIK	0.802723	5.14617	1.32926e-07	1.47202e-06	0	FALSE	0.0864959	0.491494	0.311538	0.497983	0.658275	3.7794	7.86043e-05	0.00195
RARA	0.769938	5.14299	1.35199e-07	1.49634e-06	1.51409	FALSE	0.39821	2.46035	0.00694	0.0813036	0.112112	0.691496	0.244627	0.50035
CAPN2	0.747667	5.14276	1.35366e-07	1.49735e-06	1.57654	FALSE	0.513737	3.27151	0.000534879	0.00774608	0.291308	1.85775	0.0316024	0.408252
FARP1	0.611521	5.13996	1.37398e-07	1.51897e-06	1.71222	FALSE	0.369133	2.89101	0.00192001	0.0254056	0.195983	1.53666	0.0621882	0.50035
TWSG1	0.592024	5.12668	1.47449e-07	1.62916e-06	2.03018	FALSE	0.0146208	0.115965	0.45384	0.497983	0.522546	4.16125	1.58256e-05	0.000423087
PALD1	0.708025	5.12325	1.50161e-07	1.65819e-06	1.34991	FALSE	0.550808	3.72799	9.65049e-05	0.00154086	0.0458809	0.310211	0.3782	0.50035
GRM3	0.769598	5.12247	1.50776e-07	1.66405e-06	0.78818	FALSE	0.622701	3.80295	7.1493e-05	0.00116617	0.108902	0.664648	0.253138	0.50035
NCOA3	0.451736	5.11916	1.53451e-07	1.69261e-06	1.80751	FALSE	0.332973	3.55921	0.000185985	0.0028468	0.132444	1.41396	0.0786865	0.50035
ELL2	0.782502	5.11801	1.54387e-07	1.70198e-06	1.03356	FALSE	0.474516	2.88808	0.00193801	0.0256091	0.264715	1.60525	0.0542195	0.50035
NXN	0.572779	5.11224	1.59184e-07	1.75388e-06	2.05352	FALSE	0.301852	2.55354	0.00533168	0.0641468	0.298441	2.52148	0.00584312	0.101379
RANGRF	0.581999	5.1101	1.60996e-07	1.77285e-06	2.46368	FALSE	0.109963	0.890677	0.186551	0.497983	0.307061	2.49098	0.00636952	0.10897
PLD4	0.808336	5.10851	1.62358e-07	1.78685e-06	0.814732	FALSE	0.247847	1.42316	0.0773447	0.497983	0.530283	3.05875	0.00111132	0.022859
CTXN1	0.595581	5.10749	1.63234e-07	1.79548e-06	2.31607	FALSE	0.248353	1.99695	0.0229155	0.231431	0.309108	2.48299	0.00651425	0.111059
ARNTL	0.699041	5.10681	1.63822e-07	1.80094e-06	1.16933	FALSE	0.379631	2.56216	0.00520114	0.0628074	0.0352479	0.23815	0.405882	0.50035
HIST1H2AP	0.112026	5.10534	1.65101e-07	1.81298e-06	5.20103	FALSE	0.0262105	1.12342	0.13063	0.497983	0.0474243	2.02849	0.0212551	0.300063
CDK6	0.610216	5.10534	1.65102e-07	1.81298e-06	1.50984	FALSE	0.24645	2.00817	0.0223127	0.226626	0.190169	1.54757	0.0608632	0.50035
PDLIM7	0.678281	5.10037	1.69494e-07	1.86016e-06	2.2175	FALSE	0.290485	2.03371	0.0209904	0.215201	0.0656975	0.459957	0.322773	0.50035
SNX10	0.650455	5.09773	1.71878e-07	1.88528e-06	2.16706	FALSE	0.427906	3.12949	0.000875544	0.0122109	0.113995	0.834947	0.201874	0.50035
WT1	0.647644	5.09203	1.77123e-07	1.94173e-06	0	FALSE	0.051426	0.368184	0.356368	0.497983	0.509768	3.71049	0.00010343	0.00253068
TMEM106C	0.856359	5.08888	1.80091e-07	1.97316e-06	1.59877	FALSE	0.688915	3.84461	6.03713e-05	0.00100141	0.262145	1.46039	0.0720911	0.50035
TUB	0.712313	5.08413	1.84658e-07	2.02207e-06	1.28283	FALSE	0.564784	3.8111	6.91748e-05	0.00113402	0.130422	0.881202	0.189104	0.50035
SEPT11	0.619975	5.07984	1.88879e-07	2.06713e-06	3.13338	FALSE	0.529958	4.03431	2.73811e-05	0.000465743	0.0254509	0.193434	0.42331	0.50035
MGARP	0.752466	5.07752	1.91201e-07	2.09138e-06	1.84687	FALSE	0.397624	2.51001	0.00603644	0.0718768	0.281788	1.77809	0.0376946	0.46697
EML1	0.560419	5.07693	1.91795e-07	2.09592e-06	1.87051	FALSE	0.352446	2.97581	0.00146107	0.0197865	0.17371	1.46697	0.0711918	0.50035
TSC22D1	0.816407	5.07689	1.9183e-07	2.09592e-06	3.41231	FALSE	0.350246	1.99312	0.0231244	0.233301	0.105923	0.603483	0.273094	0.50035
EPHA5	0.748459	5.06901	1.99943e-07	2.18335e-06	1.04487	FALSE	0.165473	1.04164	0.14879	0.497983	0.39238	2.47988	0.00657126	0.11174
SNCA	0.827739	5.0668	2.02277e-07	2.20761e-06	0.801384	FALSE	0.660191	3.75808	8.56115e-05	0.00138154	0.109836	0.625118	0.265947	0.50035
1700010H22RIK	0.827666	5.0652	2.03984e-07	2.225e-06	0	FALSE	0.0446811	0.246891	0.402496	0.497983	0.764887	4.26091	1.01799e-05	0.00027995
NPNT	0.775439	5.06404	2.05236e-07	2.23741e-06	1.15368	FALSE	0.498259	3.04422	0.0011664	0.0160959	0.429216	2.61989	0.00439797	0.0796138
BAG3	0.762856	5.06373	2.05562e-07	2.23972e-06	1.1716	FALSE	0.480048	2.98044	0.00143918	0.019544	0.530397	3.29956	0.000484191	0.0104524
TEAD1	0.501263	5.0598	2.09846e-07	2.28513e-06	2.54719	FALSE	0.250348	2.35064	0.0093706	0.106227	0.200043	1.87629	0.030308	0.394909
DCDC2A	0.792612	5.05831	2.11491e-07	2.30177e-06	1.10737	FALSE	0.493777	2.97971	0.00144263	0.0195772	0.16464	0.996215	0.159573	0.50035
TMEFF1	0.771882	5.05732	2.12593e-07	2.31248e-06	2.46492	FALSE	0.62044	3.81064	6.93048e-05	0.0011352	0.0461481	0.283491	0.3884	0.50035
SLC22A23	0.600108	5.05431	2.15973e-07	2.34795e-06	1.41953	FALSE	0.40716	3.21362	0.000655365	0.00935289	0.0789488	0.624743	0.26607	0.50035
KDM3A	0.395892	5.05329	2.17127e-07	2.35919e-06	2.10067	FALSE	0.14565	1.73862	0.0410509	0.375719	0.178899	2.13599	0.01634	0.242175
CPNE8	0.740406	5.04785	2.23407e-07	2.42608e-06	0.959297	FALSE	0.190911	1.17955	0.119089	0.497983	0.53135	3.30391	0.00047673	0.0103027
LRP11	0.736515	5.04682	2.24609e-07	2.43778e-06	1.52914	FALSE	0.398362	2.53713	0.00558824	0.0669054	0.26521	1.69359	0.0451714	0.50035
RGS20	0.782646	5.04112	2.31409e-07	2.5102e-06	0.932631	FALSE	0.617219	3.73688	9.31579e-05	0.00149106	0.0376913	0.228467	0.409642	0.50035
CELF2	0.637074	5.04029	2.32411e-07	2.51967e-06	2.43555	FALSE	0.232104	1.75101	0.0399719	0.36687	0.238569	1.79901	0.0360084	0.452655
SLAMF8	0.793719	5.03643	2.37145e-07	2.56957e-06	0	FALSE	0.160054	0.893652	0.185754	0.497983	0.0192936	0.107833	0.457064	0.50035
CHCHD4	0.590809	5.03293	2.41524e-07	2.61558e-06	2.55385	FALSE	0.0511486	0.403793	0.343182	0.497983	0.386094	3.05668	0.00111903	0.0229934
KCTD6	0.829723	5.03199	2.42707e-07	2.62689e-06	1.45563	FALSE	0.495159	2.81891	0.00240933	0.0312068	0.166721	0.948737	0.171377	0.50035
SYTL2	0.796761	5.03189	2.42837e-07	2.62689e-06	0.811617	FALSE	0.62141	3.62862	0.000142468	0.00221701	0.0819816	0.479117	0.315928	0.50035
DDX21	0.768475	5.02942	2.4598e-07	2.65943e-06	3.26973	FALSE	0.036132	0.217673	0.413842	0.497983	0.635916	3.84502	6.02703e-05	0.00151045
UPK3BL	0.756987	5.01779	2.61352e-07	2.82407e-06	1.05847	FALSE	0.702705	4.36533	6.34657e-06	0.000115635	0.0555154	0.34444	0.365258	0.50035
SARDH	0.834884	5.0173	2.6201e-07	2.82962e-06	0	FALSE	0.413226	2.28234	0.0112348	0.124413	0.0328773	0.181375	0.428037	0.50035
ITSN1	0.470493	5.01572	2.6418e-07	2.85148e-06	2.0773	FALSE	0.0322089	0.318206	0.375164	0.497983	0.37297	3.69877	0.000108321	0.00263394
LRRN4	0.708668	5.01018	2.71896e-07	2.93316e-06	1.11243	FALSE	0.341121	2.26764	0.0116756	0.128569	0.351924	2.34185	0.00959419	0.154697
CGNL1	0.639316	5.008	2.74995e-07	2.96496e-06	1.03106	FALSE	0.436828	3.21895	0.000643296	0.00920072	0.246942	1.82258	0.0341837	0.435293
NPW	0.802168	5.00358	2.81378e-07	3.03211e-06	1.03018	FALSE	0.633191	3.65155	0.00013033	0.00204553	0.0808365	0.466158	0.320551	0.50035
CHST7	0.769896	5.00157	2.84325e-07	3.06219e-06	0.904995	FALSE	0.607254	3.72653	9.70665e-05	0.00154731	0.116257	0.714223	0.237545	0.50035
HPGDS	0.721102	4.99986	2.86856e-07	3.08775e-06	1.09487	FALSE	0.441286	2.82043	0.00239796	0.0311211	0.220678	1.41613	0.0783692	0.50035
RASL11A	0.519191	4.99822	2.89311e-07	3.11247e-06	2.25119	FALSE	0.0876771	0.782838	0.216861	0.497983	0.259398	2.31833	0.0102156	0.16391
BLCAP	0.793473	4.99627	2.92255e-07	3.14242e-06	1.61356	FALSE	0.520649	3.03415	0.00120608	0.0165851	0.0298067	0.173582	0.431097	0.50035
NECTIN2	0.71931	4.99383	2.95974e-07	3.18066e-06	1.99072	FALSE	0.248605	1.62366	0.0522241	0.457701	0.356655	2.34056	0.00962739	0.155105
COL9A3	0.806724	4.99262	2.97821e-07	3.19877e-06	1.03553	FALSE	0.610724	3.54073	0.000199513	0.00304169	0.0568528	0.330232	0.370612	0.50035
ZFP711	0.722296	4.99051	3.01094e-07	3.23215e-06	1.12121	FALSE	0.129563	0.81048	0.208832	0.497983	0.581431	3.65261	0.000129795	0.00310984
SUSD4	0.718222	4.9858	3.08535e-07	3.31022e-06	1.34181	FALSE	0.403724	2.66136	0.00389129	0.0484028	0.160528	1.05779	0.145076	0.50035
ASNS	0.550413	4.98455	3.10538e-07	3.3288e-06	2.03121	FALSE	0.129534	1.09253	0.1373	0.497983	0.309496	2.60873	0.00454396	0.0817288
PIFO	0.857112	4.9845	3.10606e-07	3.3288e-06	0.745699	FALSE	0.770818	4.15501	1.62638e-05	0.000284442	0.0763237	0.410739	0.340632	0.50035
SNHG11	0.430319	4.98317	3.1276e-07	3.35005e-06	2.45488	FALSE	0.217451	2.34791	0.00943959	0.106824	0.166007	1.79556	0.0362823	0.455222
MNX1	0.756805	4.9805	3.171e-07	3.39468e-06	0.682626	FALSE	0.456252	2.84408	0.00222698	0.0291723	0.0898155	0.561058	0.287379	0.50035
TTBK1	0.753375	4.97856	3.20292e-07	3.42698e-06	0.865707	FALSE	0.710384	4.39404	5.56304e-06	0.000101737	0.0279823	0.173245	0.431229	0.50035
KCNB1	0.545602	4.96967	3.35339e-07	3.58603e-06	1.25526	FALSE	0.338579	2.85105	0.00217879	0.02856	0.105427	0.889658	0.186825	0.50035
XPR1	0.558665	4.96927	3.36031e-07	3.59147e-06	1.69213	FALSE	0.118364	0.987584	0.161678	0.497983	0.290954	2.43661	0.00741274	0.124219
COL4A2	0.664378	4.96128	3.50144e-07	3.74026e-06	1.54414	FALSE	0.381119	2.64263	0.00411326	0.0508919	0.211252	1.46704	0.0711828	0.50035
CCDC177	0.525687	4.9592	3.53919e-07	3.77854e-06	1.80491	FALSE	0.302522	2.68918	0.0035814	0.0449634	0.20308	1.80516	0.0355246	0.448873
SEZ6L2	0.792505	4.95748	3.57068e-07	3.81009e-06	0.890492	FALSE	0.197407	1.12505	0.130284	0.497983	0.516685	2.96531	0.0015119	0.0306804
LITAF	0.719418	4.957	3.57957e-07	3.8175e-06	1.87535	FALSE	0.445052	2.91681	0.00176816	0.0235231	0.277214	1.81678	0.0346257	0.439972
HCLS1	0.784487	4.95259	3.66169e-07	3.90243e-06	0.592202	FALSE	0.48111	2.8013	0.00254486	0.0328971	0.422362	2.4613	0.00692163	0.117089
KLF6	0.518022	4.95251	3.66319e-07	3.90243e-06	1.81275	FALSE	0.280536	2.53003	0.00570271	0.0681097	0.108327	0.976471	0.164416	0.50035
ST5	0.715905	4.94541	3.79918e-07	4.04511e-06	1.25998	FALSE	0.269653	1.71399	0.0432652	0.391945	0.530418	3.38463	0.000356368	0.00793757
SIK1	0.554644	4.9431	3.84445e-07	4.09109e-06	1.29581	FALSE	0.47151	3.96026	3.74346e-05	0.000631083	0.0978768	0.821448	0.205695	0.50035
ARG2	0.831393	4.9377	3.95255e-07	4.20385e-06	0.869268	FALSE	0.614789	3.42851	0.000303455	0.00452141	0.0557711	0.311212	0.37782	0.50035
CLIC6	0.804777	4.93739	3.9587e-07	4.20811e-06	0.887311	FALSE	0.751018	4.32695	7.55947e-06	0.000136593	0.0348711	0.201121	0.420302	0.50035
COL4A6	0.704833	4.9372	3.96266e-07	4.21004e-06	1.31123	FALSE	0.540495	3.64538	0.000133501	0.00208907	0.213817	1.44325	0.0744746	0.50035
DCBLD1	0.792707	4.93506	4.00626e-07	4.25405e-06	1.51454	FALSE	0.671304	3.90191	4.77186e-05	0.000800326	0.0556732	0.324345	0.372839	0.50035
JUN	0.509717	4.92937	4.12468e-07	4.37743e-06	2.30871	FALSE	0.104815	0.935788	0.174691	0.497983	0.07004	0.62618	0.265599	0.50035
MYRFL	0.813792	4.92903	4.13197e-07	4.38279e-06	0.779491	FALSE	0.581285	3.25891	0.000559206	0.00807454	0.120123	0.674034	0.250145	0.50035
9330159F19RIK	0.64607	4.92342	4.25234e-07	4.50803e-06	1.30689	FALSE	0.194762	1.34513	0.0892915	0.497983	0.0326839	0.226119	0.410555	0.50035
GM26735	0.450067	4.92141	4.29614e-07	4.55201e-06	1.92079	FALSE	0.113893	1.1667	0.121666	0.497983	0.269604	2.76176	0.00287458	0.0543428
COL18A1	0.614945	4.92115	4.30189e-07	4.55564e-06	2.61094	FALSE	0.0653869	0.48874	0.312513	0.497983	0.388607	2.91445	0.00178159	0.0356372
MUP6	0.813527	4.90916	4.57342e-07	4.84057e-06	0.512798	FALSE	0.345389	1.88547	0.0296832	0.286228	0.147821	0.807544	0.209677	0.50035
TNS1	0.730332	4.90865	4.58522e-07	4.85045e-06	0.888278	FALSE	0.58662	3.70154	0.000107149	0.00170388	0.0940755	0.59332	0.276484	0.50035
HHIP	0.798027	4.90693	4.62566e-07	4.89059e-06	0.718389	FALSE	0.212746	1.24222	0.107078	0.497983	0.416245	2.43928	0.00735828	0.123678
KIF23	0.210009	4.89738	4.85617e-07	5.13154e-06	2.56431	FALSE	0.103845	2.27803	0.0113625	0.125686	0.0382964	0.839895	0.200484	0.50035
ADAMTSL2	0.644675	4.89561	4.90007e-07	5.17514e-06	0	FALSE	0.115329	0.993147	0.160319	0.497983	0.0592919	0.523985	0.300145	0.50035
LINGO1	0.771564	4.89155	5.00216e-07	5.28012e-06	1.11461	FALSE	0.681978	4.04504	2.61571e-05	0.000445943	0.0765171	0.453182	0.325209	0.50035
CKAP4	0.808137	4.88241	5.23987e-07	5.52806e-06	2.59333	FALSE	0.444723	2.48244	0.00652438	0.0767832	0.341512	1.90961	0.0280919	0.372968
GGCT	0.647202	4.87324	5.48912e-07	5.78791e-06	1.83522	FALSE	0.516512	3.65711	0.00012754	0.00200538	0.0192132	0.136105	0.445869	0.50035
TRAK1	0.594542	4.8607	5.84866e-07	6.16371e-06	1.57056	FALSE	0.30295	2.30684	0.010532	0.117521	0.150085	1.14541	0.12602	0.50035
HMGCS2	0.81126	4.85335	6.06965e-07	6.39317e-06	0	FALSE	0.0702762	0.377962	0.352729	0.497983	0.662431	3.59282	0.000163557	0.0038622
GDF11	0.617367	4.85304	6.07916e-07	6.39975e-06	1.60373	FALSE	0.488778	3.63064	0.000141361	0.00220153	0.151974	1.12856	0.129541	0.50035
TRIM16	0.800161	4.85176	6.11852e-07	6.43774e-06	0.499878	FALSE	0.0609644	0.331663	0.370072	0.497983	0.679259	3.72333	9.83078e-05	0.00241137
ATOH1	0.728544	4.8358	6.63071e-07	6.97291e-06	0	FALSE	0.168416	1.13916	0.127318	0.497983	0.0817992	0.547602	0.291983	0.50035
OLFM2	0.752819	4.82595	6.96677e-07	7.32238e-06	1.23893	FALSE	0.530833	3.19148	0.000707725	0.010049	0.246081	1.47903	0.0695656	0.50035
GM26917	0.355133	4.81879	7.22142e-07	7.58597e-06	3.7816	FALSE	0.11259	1.43575	0.0755363	0.497983	0.147304	1.87915	0.0301119	0.393137
PARK7	0.38006	4.81732	7.27512e-07	7.63829e-06	2.6353	FALSE	0.204423	2.45749	0.0069955	0.0819049	0.03675	0.440579	0.329759	0.50035
DBX2	0.748448	4.81477	7.36861e-07	7.73231e-06	0.79173	FALSE	0.36241	2.2102	0.0135455	0.146529	0.45848	2.78836	0.00264876	0.0503649
VWA2	0.809805	4.8103	7.53538e-07	7.90309e-06	0.837509	FALSE	0.752271	4.21987	1.22224e-05	0.000216657	0.0367466	0.205842	0.418457	0.50035
KCNH5	0.64664	4.80947	7.56647e-07	7.93145e-06	0.803526	FALSE	0.397796	2.72313	0.00323332	0.0409074	0.122669	0.842321	0.199804	0.50035
THRB	0.775406	4.8076	7.63777e-07	8.00192e-06	0	FALSE	0.353347	2.0362	0.020865	0.214139	0.0556136	0.31976	0.374575	0.50035
TCERG1L	0.760782	4.80539	7.72248e-07	8.08636e-06	0.980958	FALSE	0.422927	2.45602	0.00702434	0.0821936	0.306278	1.78104	0.037453	0.465446
CCDC136	0.732012	4.79935	7.95904e-07	8.32961e-06	1.92381	FALSE	0.580998	3.56687	0.000180638	0.0027671	0.197882	1.21807	0.111598	0.50035
CPXM1	0.760492	4.79788	8.01776e-07	8.38659e-06	1.59228	FALSE	0.104038	0.603869	0.272965	0.497983	0.375995	2.1935	0.0141358	0.214896
ME1	0.79139	4.79094	8.29995e-07	8.67714e-06	1.12124	FALSE	0.657605	3.73828	9.26425e-05	0.00148402	0.217812	1.23903	0.107668	0.50035
USH1C	0.756133	4.78659	8.48175e-07	8.86248e-06	1.47447	FALSE	0.692202	4.06768	2.37414e-05	0.000407275	0.139334	0.816732	0.207041	0.50035
GM13479	0.74801	4.78226	8.66667e-07	9.05088e-06	0	FALSE	0.115536	0.67716	0.249152	0.497983	0.601288	3.55018	0.000192485	0.00449124
UPK1B	0.804188	4.77882	8.81614e-07	9.20208e-06	0	FALSE	0.0413426	0.221338	0.412415	0.497983	0.674579	3.63104	0.000141141	0.00336527
PCSK9	0.735852	4.77224	9.10926e-07	9.50298e-06	1.03519	FALSE	0.236148	1.41781	0.078123	0.497983	0.0675384	0.405205	0.342663	0.50035
HS3ST5	0.775678	4.75973	9.69242e-07	1.0106e-05	0	FALSE	0.478318	2.69951	0.00347206	0.0436465	0.317221	1.79248	0.0365282	0.457138
NOTCH1	0.620147	4.75058	1.01417e-06	1.05688e-05	1.82542	FALSE	0.29485	2.17521	0.0148071	0.158516	0.199767	1.4788	0.0695968	0.50035
KANK1	0.524892	4.75046	1.01478e-06	1.05696e-05	1.80351	FALSE	0.0838199	0.705903	0.240124	0.497983	0.325408	2.74532	0.00302259	0.0567582
GM3696	0.706128	4.74463	1.04442e-06	1.08725e-05	0.857364	FALSE	0.600117	3.73449	9.4047e-05	0.00150406	0.0122059	0.0759143	0.469744	0.50035
STK32C	0.789667	4.74307	1.05254e-06	1.09512e-05	0.92203	FALSE	0.412966	2.27647	0.0114089	0.125845	0.0644538	0.356189	0.36085	0.50035
PLXNA1	0.456384	4.7428	1.0539e-06	1.09595e-05	1.5743	FALSE	0.324033	3.14006	0.000844562	0.0118209	0.0557362	0.540946	0.294272	0.50035
DTX4	0.573483	4.7425	1.05549e-06	1.09703e-05	1.73134	FALSE	0.381965	2.95375	0.00156971	0.0211409	0.0694511	0.537619	0.29542	0.50035
LRP4	0.58209	4.73976	1.06984e-06	1.11135e-05	1.62076	FALSE	0.397864	3.09614	0.000980273	0.0136232	0.0933968	0.725393	0.234105	0.50035
MKI67	0.214108	4.73891	1.07437e-06	1.11547e-05	3.44042	FALSE	0.0629393	1.31503	0.0942496	0.497983	0.0786488	1.64275	0.0502178	0.50035
LSR	0.637266	4.73785	1.08e-06	1.12073e-05	2.09923	FALSE	0.470177	3.25647	0.000564035	0.00813828	0.111458	0.770695	0.220444	0.50035
NPM3	0.695624	4.73102	1.11696e-06	1.15846e-05	3.01129	FALSE	0.359038	2.27709	0.0113905	0.125783	0.18914	1.19995	0.11508	0.50035
SOX18	0.79245	4.72816	1.13281e-06	1.17429e-05	0.673901	FALSE	0.435884	2.49474	0.00630253	0.0745027	0.349754	2.00448	0.0225091	0.313705
TNKS2	0.597338	4.72499	1.15065e-06	1.19215e-05	2.76693	FALSE	0.377096	2.76775	0.00282221	0.0361255	0.168682	1.23701	0.108041	0.50035
LHFPL2	0.685616	4.7201	1.17863e-06	1.22049e-05	1.19145	FALSE	0.321334	2.06651	0.01939	0.201211	0.204053	1.30985	0.0951229	0.50035
SCIN	0.791949	4.71901	1.18497e-06	1.22641e-05	0	FALSE	0.0643188	0.349566	0.363332	0.497983	0.764923	4.18134	1.449e-05	0.00039111
GSTA4	0.392695	4.71761	1.19314e-06	1.23421e-05	3.18595	FALSE	0.124	1.42106	0.0776497	0.497983	0.263248	3.01228	0.00129647	0.0264457
TRPM6	0.83433	4.71109	1.23197e-06	1.27371e-05	0.618812	FALSE	0.672467	3.52174	0.000214363	0.00324321	0.133939	0.702327	0.241237	0.50035
PRKCE	0.743397	4.70517	1.26829e-06	1.31057e-05	1.24364	FALSE	0.0759976	0.437103	0.331018	0.497983	0.600578	3.4716	0.000258685	0.0059094
DOC2A	0.732178	4.70444	1.27281e-06	1.31454e-05	1.08045	FALSE	0.596345	3.60226	0.000157728	0.00244286	0.0622839	0.376012	0.353454	0.50035
TPM2	0.693885	4.70236	1.28588e-06	1.32734e-05	2.01485	FALSE	0.506419	3.19985	0.000687489	0.00978998	0.212299	1.34076	0.0899992	0.50035
LGR5	0.69419	4.70043	1.29804e-06	1.33919e-05	1.16866	FALSE	0.191667	1.22638	0.110028	0.497983	0.37823	2.42492	0.00765583	0.127638
SYNM	0.658086	4.70023	1.29937e-06	1.33986e-05	1.27491	FALSE	0.405938	2.7175	0.00328891	0.0415304	0.225923	1.50927	0.0656154	0.50035
MARCH9	0.623642	4.69965	1.30305e-06	1.34295e-05	1.91001	FALSE	0.518429	3.67452	0.00011915	0.001881	0.0995201	0.705197	0.240344	0.50035
RASL10B	0.800208	4.6936	1.34218e-06	1.38255e-05	1.25552	FALSE	0.568742	3.10873	0.000939457	0.0130744	0.0684897	0.373192	0.354503	0.50035
HSPBAP1	0.695215	4.69192	1.35326e-06	1.39324e-05	1.69519	FALSE	0.535735	3.37597	0.00036778	0.00541813	0.092138	0.579734	0.281047	0.50035
XIST	0.246822	4.6904	1.36337e-06	1.40291e-05	3.13449	FALSE	0.0814194	1.45768	0.0724646	0.497983	0.0685136	1.22675	0.109959	0.50035
TACR1	0.701725	4.69006	1.36562e-06	1.40449e-05	0	FALSE	0.0460618	0.280531	0.389535	0.497983	0.534338	3.28285	0.000513818	0.0110677
SLC16A2	0.778389	4.6886	1.3754e-06	1.4138e-05	1.21216	FALSE	0.492157	2.83527	0.00228932	0.0298891	0.294367	1.6959	0.0449523	0.50035
EBP	0.695399	4.68838	1.37691e-06	1.41462e-05	1.80732	FALSE	0.555176	3.57068	0.000178027	0.00273351	0.0652102	0.419584	0.337395	0.50035
MTHFD2	0.748357	4.68022	1.43283e-06	1.4713e-05	2.31225	FALSE	0.283908	1.65977	0.04848	0.429491	0.301883	1.76378	0.0388848	0.477195
ABR	0.580593	4.67995	1.43473e-06	1.47247e-05	1.48148	FALSE	0.100324	0.775653	0.218977	0.497983	0.328288	2.54176	0.00551478	0.0968815
SBK1	0.633516	4.67829	1.44638e-06	1.48366e-05	1.80626	FALSE	0.29542	2.02906	0.0212261	0.216937	0.334849	2.30255	0.0106521	0.169527
EIF4EBP1	0.533655	4.67765	1.4509e-06	1.48751e-05	3.00992	FALSE	0.306113	2.4981	0.00624306	0.0738888	0.138031	1.1255	0.130188	0.50035
CDKN1A	0.638636	4.67745	1.45232e-06	1.48819e-05	1.48195	FALSE	0.246888	1.83765	0.0330568	0.313369	0.0799469	0.599942	0.274273	0.50035
RSPH9	0.703291	4.67443	1.47387e-06	1.50948e-05	1.00567	FALSE	0.0568523	0.347748	0.364015	0.497983	0.582524	3.57694	0.000173821	0.00409471
ZBTB16	0.438685	4.66867	1.5158e-06	1.55162e-05	2.21114	FALSE	0.0963133	0.967349	0.166685	0.497983	0.173627	1.7454	0.0404578	0.493721
KIF1B	0.525574	4.66793	1.52127e-06	1.55641e-05	2.70051	FALSE	0.432865	3.59238	0.000163836	0.00252946	0.0392192	0.324672	0.372715	0.50035
TAX1BP3	0.757506	4.66665	1.53072e-06	1.56526e-05	1.59656	FALSE	0.221409	1.30384	0.0961439	0.497983	0.388494	2.29204	0.0109516	0.172829
BMI1	0.677984	4.66362	1.55351e-06	1.58773e-05	1.80984	FALSE	0.573638	3.71515	0.000101541	0.00161732	0.0337648	0.218305	0.413596	0.50035
UACA	0.347786	4.64858	1.67112e-06	1.70705e-05	1.94494	FALSE	0.0817517	1.02871	0.151808	0.497983	0.211951	2.66529	0.00384607	0.0704682
SMYD2	0.679617	4.64463	1.70346e-06	1.73918e-05	1.80355	FALSE	0.42511	2.73108	0.00315635	0.0399852	0.120498	0.77136	0.220247	0.50035
RPH3A	0.624347	4.6407	1.73616e-06	1.77165e-05	0	FALSE	0.288273	1.98424	0.0236146	0.237392	0.27055	1.8477	0.0323226	0.416732
CDKN1B	0.561307	4.63703	1.76724e-06	1.80242e-05	1.82681	FALSE	0.190987	1.47698	0.0698401	0.497983	0.283633	2.19343	0.014138	0.214896
RAB11FIP1	0.447552	4.62845	1.84203e-06	1.87772e-05	1.83391	FALSE	0.219671	2.1258	0.0167599	0.176532	0.0432595	0.419528	0.337415	0.50035
LGALSL	0.739054	4.62828	1.8436e-06	1.87835e-05	1.36775	FALSE	0.449011	2.63967	0.00414937	0.0513063	0.110415	0.648143	0.258446	0.50035
CARHSP1	0.680355	4.62627	1.86155e-06	1.89565e-05	2.29303	FALSE	0.585728	3.73277	9.46942e-05	0.00151318	0.153221	0.975233	0.164722	0.50035
PSD3	0.668082	4.62383	1.88358e-06	1.91709e-05	1.04937	FALSE	0.0826503	0.521153	0.30113	0.497983	0.219936	1.39066	0.0821648	0.50035
DDX58	0.760452	4.62338	1.88766e-06	1.92024e-05	0.75039	FALSE	0.0696216	0.390896	0.347937	0.497983	0.669984	3.76759	8.24152e-05	0.00203682
NTM	0.747891	4.61767	1.94033e-06	1.9728e-05	1.19864	FALSE	0.391999	2.35123	0.00935585	0.106183	0.221595	1.33074	0.0916367	0.50035
PRKCA	0.820889	4.61732	1.94359e-06	1.9751e-05	1.04965	FALSE	0.462422	2.44698	0.00720293	0.0840828	0.0349445	0.185296	0.426498	0.50035
IQCJ	0.713751	4.61612	1.95488e-06	1.98554e-05	0	FALSE	0.0712095	0.415166	0.33901	0.497983	0.673611	3.9405	4.06564e-05	0.0010388
GNB2	0.413137	4.6096	2.01723e-06	2.04781e-05	3.19356	FALSE	0.244889	2.58574	0.00485852	0.0591431	0.0887022	0.936708	0.174454	0.50035
GRN	0.754489	4.60577	2.05469e-06	2.08476e-05	1.47217	FALSE	0.0456946	0.254429	0.399582	0.497983	0.618734	3.46104	0.000269045	0.00612468
ALCAM	0.666267	4.60501	2.06221e-06	2.0913e-05	1.27277	FALSE	0.328766	2.21489	0.0133837	0.145019	0.135412	0.912022	0.180879	0.50035
ZNRF3	0.59975	4.60473	2.06498e-06	2.09304e-05	1.50611	FALSE	0.394917	2.83654	0.00228028	0.0298107	0.0848915	0.610115	0.270893	0.50035
LRPAP1	0.62885	4.60219	2.09036e-06	2.11766e-05	2.0124	FALSE	0.274977	1.87541	0.0303683	0.292116	0.355576	2.42954	0.00755893	0.126453
KIF11	0.18855	4.59308	2.18372e-06	2.2111e-05	2.66458	FALSE	0.044343	1.01501	0.155049	0.497983	0.0592714	1.35691	0.0874054	0.50035
EGFLAM	0.754773	4.59296	2.18505e-06	2.21131e-05	0.723685	FALSE	0.277078	1.56467	0.0588307	0.497983	0.569926	3.23209	0.000614445	0.0130915
MBOAT1	0.749859	4.58793	2.23832e-06	2.26405e-05	0.890706	FALSE	0.239227	1.31989	0.0934354	0.497983	0.0246704	0.136378	0.445761	0.50035
NKX2-3	0.705341	4.58447	2.27564e-06	2.30062e-05	0.880925	FALSE	0.420249	2.59068	0.00478926	0.058445	0.423109	2.61067	0.00451827	0.0815657
SAPCD2	0.30435	4.58239	2.29851e-06	2.32254e-05	1.8102	FALSE	0.0812542	1.13701	0.127767	0.497983	0.170012	2.38084	0.00863661	0.140644
PDZD4	0.53158	4.57971	2.32808e-06	2.35055e-05	1.72119	FALSE	0.371212	3.05233	0.00113536	0.0156896	0.066453	0.546877	0.292232	0.50035
BCL2L11	0.483879	4.57966	2.32863e-06	2.35055e-05	2.25669	FALSE	0.181487	1.60716	0.0540097	0.469576	0.139983	1.23942	0.107595	0.50035
HS6ST1	0.588085	4.57904	2.33554e-06	2.35632e-05	1.7957	FALSE	0.398291	2.94817	0.00159829	0.0214817	0.0808099	0.598842	0.274639	0.50035
ISG15	0.829579	4.57664	2.36256e-06	2.38235e-05	0	FALSE	0.405175	2.09533	0.0180707	0.188919	0.0297986	0.15316	0.439136	0.50035
NLGN2	0.603273	4.57415	2.39084e-06	2.40963e-05	1.52983	FALSE	0.46295	3.2801	0.000518849	0.00753618	0.100623	0.71393	0.237635	0.50035
CDH2	0.721799	4.57185	2.41721e-06	2.43495e-05	3.01605	FALSE	0.379806	2.23208	0.012805	0.139428	0.190005	1.11627	0.132153	0.50035
DNAJC3	0.66325	4.56605	2.48499e-06	2.50195e-05	2.43307	FALSE	0.547504	3.51778	0.000217587	0.00328439	0.067143	0.43134	0.33311	0.50035
MEGF9	0.682052	4.56025	2.55469e-06	2.5708e-05	1.30943	FALSE	0.481283	2.96916	0.00149308	0.020206	0.166211	1.02752	0.152088	0.50035
MS4A4D	0.835846	4.55727	2.5911e-06	2.60611e-05	0.835405	FALSE	0.255394	1.28215	0.0998952	0.497983	0.573753	2.894	0.00190185	0.0378117
GATA2	0.645551	4.55019	2.67985e-06	2.69399e-05	0	FALSE	0.141319	1.11112	0.133258	0.497983	0.133539	1.06006	0.144558	0.50035
COX4I2	0.735702	4.54931	2.69109e-06	2.70391e-05	1.48844	FALSE	0.355884	2.04088	0.0206315	0.212298	0.119184	0.683568	0.247124	0.50035
AEN	0.603106	4.54917	2.69293e-06	2.70436e-05	2.40444	FALSE	0.0985214	0.687702	0.24582	0.497983	0.365669	2.55346	0.00533294	0.0940237
TUBGCP2	0.789817	4.54665	2.72532e-06	2.7355e-05	1.9776	FALSE	0.701843	3.81549	6.79577e-05	0.00111761	0.0778343	0.423027	0.336138	0.50035
COL27A1	0.685579	4.54617	2.73149e-06	2.74029e-05	1.50395	FALSE	0.580605	3.6514	0.000130406	0.00204553	0.0811545	0.510791	0.304749	0.50035
GM7325	0.591679	4.54555	2.73954e-06	2.74696e-05	0	FALSE	0.119048	1.02583	0.152486	0.497983	0.0468794	0.422221	0.336432	0.50035
6720489N17RIK	0.694135	4.54528	2.74315e-06	2.74918e-05	1.59171	FALSE	0.652854	4.0171	2.9459e-05	0.000499632	0.096845	0.596069	0.275565	0.50035
SLC4A4	0.602537	4.54388	2.76138e-06	2.76604e-05	1.44899	FALSE	0.368755	2.6122	0.00449805	0.0553041	0.219872	1.55338	0.0601659	0.50035
MUM1	0.798753	4.54148	2.79302e-06	2.79629e-05	2.34809	FALSE	0.458149	2.40368	0.00811557	0.0937327	0.420938	2.20679	0.0136645	0.20932
HS6ST2	0.625276	4.53704	2.85252e-06	2.85441e-05	1.62358	FALSE	0.42247	2.87693	0.00200781	0.0264247	0.0471792	0.321884	0.37377	0.50035
SGPP2	0.707622	4.53619	2.864e-06	2.86444e-05	0.719122	FALSE	0.260704	1.70704	0.0439074	0.3965	0.301387	1.98919	0.0233399	0.321431
RIMS1	0.772215	4.53499	2.88033e-06	2.8793e-05	0.908883	FALSE	0.680662	3.75232	8.76019e-05	0.00140903	0.0248745	0.137274	0.445407	0.50035
SLC7A7	0.77039	4.53366	2.89853e-06	2.89602e-05	0.663458	FALSE	0.201833	1.11181	0.13311	0.497983	0.0541462	0.298141	0.382798	0.50035
MARVELD2	0.788552	4.5317	2.92554e-06	2.92152e-05	0.740276	FALSE	0.691129	3.74237	9.11481e-05	0.00146486	0.0324437	0.176053	0.430126	0.50035
SERTAD1	0.7183	4.53025	2.9457e-06	2.94015e-05	1.29181	FALSE	0.192646	1.14049	0.12704	0.497983	0.386347	2.2946	0.0108779	0.172143
SLC12A5	0.774768	4.52722	2.98827e-06	2.98113e-05	0.777216	FALSE	0.541463	2.94576	0.00161079	0.0216349	0.0177434	0.0961995	0.461681	0.50035
C430049E01RIK	0.748982	4.52485	3.02194e-06	3.01271e-05	0.8838	FALSE	0.120118	0.673078	0.250449	0.497983	0.369034	2.07432	0.019025	0.2729
GPR162	0.770967	4.52477	3.023e-06	3.01271e-05	1.20588	FALSE	0.723061	3.95467	3.83203e-05	0.000645458	0.0295558	0.161626	0.4358	0.50035
CRMP1	0.799236	4.51983	3.0945e-06	3.0824e-05	2.05425	FALSE	0.636028	3.35832	0.000392091	0.00575899	0.136825	0.723184	0.234783	0.50035
DAP	0.695901	4.51769	3.12589e-06	3.11209e-05	1.93499	FALSE	0.425155	2.57831	0.00496427	0.0602436	0.130975	0.796066	0.212997	0.50035
RAB7B	0.801133	4.51693	3.1372e-06	3.12176e-05	0	FALSE	0.452915	2.36339	0.00905432	0.103178	0.0359438	0.186738	0.425933	0.50035
AMOTL2	0.473578	4.51647	3.14397e-06	3.12692e-05	2.08872	FALSE	0.0727373	0.660234	0.254552	0.497983	0.232996	2.11966	0.0170176	0.249578
APPL2	0.694313	4.51429	3.17639e-06	3.15757e-05	1.37114	FALSE	0.135638	0.812563	0.208234	0.497983	0.442234	2.65339	0.00398439	0.0727986
P4HA1	0.706466	4.51329	3.19154e-06	3.17102e-05	2.53801	FALSE	0.354443	2.08603	0.0184881	0.192667	0.120389	0.70882	0.239218	0.50035
TRAM2	0.624815	4.51256	3.20256e-06	3.18036e-05	1.32137	FALSE	0.375872	2.49927	0.00622249	0.0737342	0.314131	2.09434	0.0181148	0.263504
G630016G05RIK	0.728486	4.51191	3.21227e-06	3.18839e-05	0.903686	FALSE	0.533105	3.07066	0.00106793	0.014789	0.076474	0.44024	0.329882	0.50035
CDH8	0.716546	4.50595	3.30388e-06	3.27765e-05	0.697157	FALSE	0.431561	2.55836	0.00525833	0.0634199	0.251487	1.49148	0.0679183	0.50035
RCAN1	0.705891	4.49643	3.4552e-06	3.42604e-05	1.83335	FALSE	0.393317	2.32894	0.00993121	0.111666	0.030793	0.182048	0.427773	0.50035
ANXA4	0.802764	4.49433	3.48949e-06	3.4583e-05	0.753447	FALSE	0.161632	0.835331	0.201766	0.497983	0.576404	2.99128	0.00138907	0.0282756
SELENOM	0.474369	4.4939	3.49652e-06	3.46352e-05	2.16527	FALSE	0.0210289	0.185936	0.426248	0.497983	0.367043	3.25274	0.000571498	0.0122429
AKR1C19	0.803694	4.48875	3.58217e-06	3.54657e-05	0	FALSE	0.227723	1.18237	0.118529	0.497983	0.0106444	0.0550679	0.478042	0.50035
ASPM	0.156576	4.48801	3.59465e-06	3.55713e-05	2.52337	FALSE	0.0429076	1.15727	0.123582	0.497983	0.0477983	1.28935	0.0986376	0.50035
CASP6	0.773287	4.48352	3.67112e-06	3.63097e-05	1.50561	FALSE	0.445068	2.41758	0.00781201	0.0905245	0.357624	1.9432	0.0259961	0.3506
FRAT1	0.600515	4.47962	3.73889e-06	3.69613e-05	1.45921	FALSE	0.446795	3.14332	0.000835215	0.0116984	0.199844	1.40339	0.0802503	0.50035
TM6SF1	0.789836	4.47948	3.74133e-06	3.69669e-05	1.13438	FALSE	0.689226	3.68336	0.000115092	0.0018228	0.0545019	0.291318	0.385404	0.50035
ADD3	0.631587	4.47936	3.74333e-06	3.6968e-05	2.12967	FALSE	0.513013	3.42356	0.000309034	0.00460105	0.0888405	0.592618	0.276719	0.50035
FAM183B	0.802481	4.47623	3.79871e-06	3.74912e-05	0.815217	FALSE	0.142533	0.722826	0.234893	0.497983	0.666484	3.39159	0.000347446	0.00778304
CCDC88A	0.597205	4.47615	3.80013e-06	3.74912e-05	2.40878	FALSE	0.124261	0.871482	0.191745	0.497983	0.381299	2.67392	0.00374854	0.0688742
UBE2H	0.526918	4.47545	3.8125e-06	3.75943e-05	1.94021	FALSE	0.261388	2.07171	0.0191461	0.198891	0.20125	1.59901	0.0549088	0.50035
NDST3	0.72809	4.47401	3.8384e-06	3.78261e-05	0	FALSE	0.467641	2.63722	0.00417943	0.0516455	0.0581152	0.328128	0.371407	0.50035
CCDC184	0.807528	4.47392	3.83987e-06	3.78261e-05	0.894077	FALSE	0.287851	1.45241	0.0731942	0.497983	0.519791	2.6319	0.00424541	0.0771014
MYT1	0.73008	4.47237	3.86787e-06	3.80829e-05	0.454938	FALSE	0.339866	2.02262	0.0215561	0.219966	0.0222296	0.132815	0.44717	0.50035
APBB1	0.756102	4.46918	3.92594e-06	3.86353e-05	1.75914	FALSE	0.55087	2.99685	0.00136394	0.0185865	0.314724	1.71376	0.0432861	0.50035
CHL1	0.803395	4.46398	4.02256e-06	3.95663e-05	0	FALSE	0.215349	1.09293	0.137212	0.497983	0.123359	0.626925	0.265354	0.50035
PKNOX1	0.656797	4.45989	4.10011e-06	4.03088e-05	1.41668	FALSE	0.558999	3.54055	0.000199648	0.00304169	0.0257996	0.163465	0.435076	0.50035
DBNDD1	0.779989	4.45667	4.16222e-06	4.0899e-05	1.2682	FALSE	0.344942	1.82533	0.0339759	0.320841	0.421904	2.24005	0.0125438	0.194276
TMEM53	0.786154	4.45082	4.2771e-06	4.20068e-05	0.801501	FALSE	0.345475	1.80025	0.0359108	0.336041	0.257227	1.34143	0.0898897	0.50035
ERICH3	0.751079	4.44863	4.32092e-06	4.24159e-05	0	FALSE	0.0508016	0.266783	0.394818	0.497983	0.630234	3.34929	0.000405093	0.00896183
[truncated: 17,624 more rows]
