# Supplementary material for: A single-cell atlas of spatial and temporal gene expression in the mouse cranial neural plate
Source: bioRxiv preprint, doi:10.1101/2024.08.25.609458, version 3 (2025-03-06)
Supplement: Table S7 [file 609458_file03.xlsx]

## Sheet: Sheet1
Gene	C, MSD	Z, MSD	Pval, MSD	FDR, MSD	Range	Patterned	C, A-P	Z, A-P	Pval, A-P	FDR, A-P	C, M-L	Z, M-L	Pval, M-L	FDR, M-L	2D Cluster	2D Cluster, D=1	2D Cluster, D=2	2D Cluster, D=3	2D Cluster, D=4	2D Cluster, D=5	2D Cluster, D=6	2D Cluster, D=7	2D Cluster, D=8	2D Cluster, D=9	2D Cluster, D=10	A-P Axis Cluster	M-L Axis Cluster	Predicted AP domain	Known AP domain	AP Prediction/Data agree?	Predicted ML Domain	Known ML domain	ML Prediction/Data agree?	Symbol	Name	Feature Type	links
IRS4	0.928925	189.184	0	0	2.99726	TRUE	0.894513	170.776	0	0	0.0475634	9.08564	5.15436e-20	3.01024e-18	6	806	22	93	46	46	16	16	16	6	6	0		Forebrain (Anterior and Posterior)	No images	NA	NA	No images	NA	Irs4	insulin receptor substrate 4	protein coding gene	http://www.informatics.jax.org/gxd/marker/MGI:1338009?tab=imagestab#gxd=markerMgiId%3DMGI%3A102764%26theilerStage%3D%26assayType%3D%26results%3D25%26startIndex%3D0%26sort%3D%26dir%3Dasc%26tab%3Dimagestab%26theilerStageFilter%3D12%26theilerStageFilter%3D13%26theilerStageFilter%3D14%26wildtypeFilter%3Dwild%20type
ERAS	0.958244	175.696	0	0	2.4817	TRUE	0.885484	151.158	0	0	0.0518501	8.84565	4.54993e-19	2.52927e-17	6	836	22	93	46	46	16	16	16	6	6	0		Forebrain (Anterior and Posterior)	No images	NA	NA	No images	NA	Eras	ES cell-expressed Ras	protein coding gene	http://www.informatics.jax.org/gxd/marker/MGI:2665023?tab=imagestab#gxd=markerMgiId%3DMGI%3A102764%26theilerStage%3D%26assayType%3D%26results%3D25%26startIndex%3D0%26sort%3D%26dir%3Dasc%26tab%3Dimagestab%26theilerStageFilter%3D12%26theilerStageFilter%3D13%26theilerStageFilter%3D14%26wildtypeFilter%3Dwild%20type
PCSK1N	0.937836	143.687	0	0	3.08794	TRUE	0.893341	127.76	0	0	0.0562544	8.0366	4.61812e-16	2.2431e-14	6	539	22	93	46	46	16	16	16	6	6	0		Forebrain (Anterior and Posterior)	FB	Yes	NA	Midline excluded	NA	Pcsk1n	proprotein convertase subtilisin/kexin type 1 inhibitor	protein coding gene	http://www.informatics.jax.org/gxd/marker/MGI:1353431?tab=imagestab#gxd=markerMgiId%3DMGI%3A102764%26theilerStage%3D%26assayType%3D%26results%3D25%26startIndex%3D0%26sort%3D%26dir%3Dasc%26tab%3Dimagestab%26theilerStageFilter%3D12%26theilerStageFilter%3D13%26theilerStageFilter%3D14%26wildtypeFilter%3Dwild%20type
FOXD1	0.905107	185.525	0	0	3.16292	TRUE	0.640623	124.113	0	0	0.189124	36.6878	5.70697e-295	2.33308e-292	3	548	153	92	17	35	1	7	7	3	3	0	3	Forebrain (Anterior and Posterior)	FB, weak MB/R1, weak HB	Yes	NA	High midline	NA	Foxd1	forkhead box D1	protein coding gene	http://www.informatics.jax.org/gxd/marker/MGI:1347463?tab=imagestab#gxd=markerMgiId%3DMGI%3A102764%26theilerStage%3D%26assayType%3D%26results%3D25%26startIndex%3D0%26sort%3D%26dir%3Dasc%26tab%3Dimagestab%26theilerStageFilter%3D12%26theilerStageFilter%3D13%26theilerStageFilter%3D14%26wildtypeFilter%3Dwild%20type
EMX2	0.909465	147.122	0	0	2.42424	TRUE	0.646954	98.6318	0	0	0.107606	16.427	6.12719e-61	7.24301e-59	3	582	56	114	2	27	1	7	7	3	3	0	2	Forebrain (Anterior and Posterior)	FB	Yes	Midline excluded	High lateral	Yes	Emx2	empty spiracles homeobox 2	protein coding gene	http://www.informatics.jax.org/gxd/marker/MGI:95388?tab=imagestab#gxd=markerMgiId%3DMGI%3A102764%26theilerStage%3D%26assayType%3D%26results%3D25%26startIndex%3D0%26sort%3D%26dir%3Dasc%26tab%3Dimagestab%26theilerStageFilter%3D12%26theilerStageFilter%3D13%26theilerStageFilter%3D14%26wildtypeFilter%3Dwild%20type
LHX5	0.917881	114.349	0	0	2.62691	TRUE	0.831056	98.1441	0	0	0.0839091	9.92009	1.70227e-23	1.0988e-21	3	693	33	65	17	35	1	7	7	3	3	0		Forebrain (Anterior and Posterior)	FB	Yes	NA	Midline excluded	NA	Lhx5	LIM homeobox protein 5	protein coding gene	http://www.informatics.jax.org/gxd/marker/MGI:107792?tab=imagestab#gxd=markerMgiId%3DMGI%3A102764%26theilerStage%3D%26assayType%3D%26results%3D25%26startIndex%3D0%26sort%3D%26dir%3Dasc%26tab%3Dimagestab%26theilerStageFilter%3D12%26theilerStageFilter%3D13%26theilerStageFilter%3D14%26wildtypeFilter%3Dwild%20type
IGFBP2	0.941205	101.702	0	0	3.82024	TRUE	0.891473	90.0292	0	0	0.0631702	6.37619	9.07715e-11	3.60569e-09	6	578	22	93	46	46	16	16	16	6	6	0		Forebrain (Anterior and Posterior)	No images	NA	NA	No images	NA	Igfbp2	insulin-like growth factor binding protein 2	protein coding gene	http://www.informatics.jax.org/gxd/marker/MGI:96437?tab=imagestab#gxd=markerMgiId%3DMGI%3A102764%26theilerStage%3D%26assayType%3D%26results%3D25%26startIndex%3D0%26sort%3D%26dir%3Dasc%26tab%3Dimagestab%26theilerStageFilter%3D12%26theilerStageFilter%3D13%26theilerStageFilter%3D14%26wildtypeFilter%3Dwild%20type
DKK1	0.897954	95.8273	0	0	3.31612	TRUE	0.71366	71.1007	0	0	0.100997	10.0745	3.58225e-24	2.34315e-22	3	787	58	59	16	16	4	10	21	3	3	0	3	Forebrain (Anterior and Posterior)	FB	Yes	NA	Global	NA	Dkk1	dickkopf WNT signaling pathway inhibitor 1	protein coding gene	http://www.informatics.jax.org/gxd/marker/MGI:1329040?tab=imagestab#gxd=markerMgiId%3DMGI%3A102764%26theilerStage%3D%26assayType%3D%26results%3D25%26startIndex%3D0%26sort%3D%26dir%3Dasc%26tab%3Dimagestab%26theilerStageFilter%3D12%26theilerStageFilter%3D13%26theilerStageFilter%3D14%26wildtypeFilter%3Dwild%20type
FEZF2	0.909439	91.2444	0	0	2.17806	TRUE	0.751245	70.7335	0	0	0.157163	14.8346	4.37936e-50	4.49928e-48	3	683	153	92	17	35	1	7	7	3	3	0	3	Forebrain (Anterior and Posterior)	FB	Yes	NA	Could not determine	NA	Fezf2	Fez family zinc finger 2	protein coding gene	http://www.informatics.jax.org/gxd/marker/MGI:1859823?tab=imagestab#gxd=markerMgiId%3DMGI%3A102764%26theilerStage%3D%26assayType%3D%26results%3D25%26startIndex%3D0%26sort%3D%26dir%3Dasc%26tab%3Dimagestab%26theilerStageFilter%3D12%26theilerStageFilter%3D13%26theilerStageFilter%3D14%26wildtypeFilter%3Dwild%20type
FOXD4	0.915067	112.177	0	0	2.19705	TRUE	0.55316	63.1033	0	0	0.330807	37.8063	0	0	3	573	286	92	17	35	1	7	7	3	3	0	4	Forebrain (Anterior and Posterior)	FB	Yes	High midline	Could not determine	NA	Foxd4	forkhead box D4	protein coding gene	http://www.informatics.jax.org/gxd/marker/MGI:1347467?tab=imagestab#gxd=markerMgiId%3DMGI%3A102764%26theilerStage%3D%26assayType%3D%26results%3D25%26startIndex%3D0%26sort%3D%26dir%3Dasc%26tab%3Dimagestab%26theilerStageFilter%3D12%26theilerStageFilter%3D13%26theilerStageFilter%3D14%26wildtypeFilter%3Dwild%20type
HDAC6	0.910287	68.0554	0	0	2.42229	TRUE	0.879154	61.665	0	0	0.0350065	2.45633	0.00701823	0.118417	6	749	22	93	46	46	16	16	16	6	6	0		Forebrain (Anterior and Posterior)	No images	NA	NA	No images	NA	Hdac6	histone deacetylase 6	protein coding gene	http://www.informatics.jax.org/gxd/marker/MGI:1333752?tab=imagestab#gxd=markerMgiId%3DMGI%3A102764%26theilerStage%3D%26assayType%3D%26results%3D25%26startIndex%3D0%26sort%3D%26dir%3Dasc%26tab%3Dimagestab%26theilerStageFilter%3D12%26theilerStageFilter%3D13%26theilerStageFilter%3D14%26wildtypeFilter%3Dwild%20type
ARX	0.893712	89.5854	0	0	2.12989	TRUE	0.556107	51.8384	0	0	0.0961916	8.98352	1.31116e-19	7.50116e-18	3	610	281	64	2	27	1	7	7	3	3	0		Forebrain (Anterior and Posterior)	No images	NA	NA	No images	NA	Arx	aristaless related homeobox	protein coding gene	http://www.informatics.jax.org/gxd/marker/MGI:1097716?tab=imagestab#gxd=markerMgiId%3DMGI%3A102764%26theilerStage%3D%26assayType%3D%26results%3D25%26startIndex%3D0%26sort%3D%26dir%3Dasc%26tab%3Dimagestab%26theilerStageFilter%3D12%26theilerStageFilter%3D13%26theilerStageFilter%3D14%26wildtypeFilter%3Dwild%20type
TUBB3	0.908888	56.33	0	0	2.43643	TRUE	0.764416	44.5077	0	0	0.14669	8.55241	6.02725e-18	3.15394e-16	3	695	33	65	17	35	1	7	7	3	3	0		Forebrain (Anterior and Posterior)	Could not determine	NA	NA	Could not determine	NA	Tubb3	tubulin, beta 3 class III	protein coding gene	http://www.informatics.jax.org/gxd/marker/MGI:107813?tab=imagestab#gxd=markerMgiId%3DMGI%3A102764%26theilerStage%3D%26assayType%3D%26results%3D25%26startIndex%3D0%26sort%3D%26dir%3Dasc%26tab%3Dimagestab%26theilerStageFilter%3D12%26theilerStageFilter%3D13%26theilerStageFilter%3D14%26wildtypeFilter%3Dwild%20type
MECOM	0.884966	53.6547	0	0	1.75723	TRUE	0.733508	41.9606	0	0	0.0655694	3.75472	8.67671e-05	0.00213898	3	487	56	114	2	27	1	7	7	3	3	0		Forebrain (Anterior and Posterior)	FB	Yes	NA	Midline excluded	NA	Mecom	MDS1 and EVI1 complex locus	protein coding gene	http://www.informatics.jax.org/gxd/marker/MGI:95457?tab=imagestab#gxd=markerMgiId%3DMGI%3A102764%26theilerStage%3D%26assayType%3D%26results%3D25%26startIndex%3D0%26sort%3D%26dir%3Dasc%26tab%3Dimagestab%26theilerStageFilter%3D12%26theilerStageFilter%3D13%26theilerStageFilter%3D14%26wildtypeFilter%3Dwild%20type
DMRTA2	0.892683	58.9175	0	0	2.02067	TRUE	0.649102	40.7847	0	0	0.142486	8.95936	1.63281e-19	9.28715e-18	3	846	56	114	2	27	1	7	7	3	3	0		Forebrain (Anterior and Posterior)	Could not determine	NA	NA	Could not determine	NA	Dmrta2	doublesex and mab-3 related transcription factor like family A2	protein coding gene	http://www.informatics.jax.org/gxd/marker/MGI:2653629?tab=imagestab#gxd=markerMgiId%3DMGI%3A102764%26theilerStage%3D%26assayType%3D%26results%3D25%26startIndex%3D0%26sort%3D%26dir%3Dasc%26tab%3Dimagestab%26theilerStageFilter%3D12%26theilerStageFilter%3D13%26theilerStageFilter%3D14%26wildtypeFilter%3Dwild%20type
PAK3	0.895282	45.581	0	0	2.09709	TRUE	0.851492	40.6457	0	0	0.0513415	2.45229	0.0070976	0.11955	3	651	85	65	17	35	1	7	7	3	3	0		Forebrain (Anterior and Posterior)	No images	NA	NA	No images	NA	Pak3	p21 (RAC1) activated kinase 3	protein coding gene	http://www.informatics.jax.org/gxd/marker/MGI:1339656?tab=imagestab#gxd=markerMgiId%3DMGI%3A102764%26theilerStage%3D%26assayType%3D%26results%3D25%26startIndex%3D0%26sort%3D%26dir%3Dasc%26tab%3Dimagestab%26theilerStageFilter%3D12%26theilerStageFilter%3D13%26theilerStageFilter%3D14%26wildtypeFilter%3Dwild%20type
FZD4	0.86859	49.9334	0	0	1.64241	TRUE	0.719727	38.7715	0	0	0.0333743	1.80066	0.0358779	0.451592	3	518	281	64	2	27	1	7	7	3	3	0		Forebrain (Anterior and Posterior)	Could not determine	NA	NA	Could not determine	NA	Fzd4	frizzled class receptor 4	protein coding gene	http://www.informatics.jax.org/gxd/marker/MGI:108520?tab=imagestab#gxd=markerMgiId%3DMGI%3A102764%26theilerStage%3D%26assayType%3D%26results%3D25%26startIndex%3D0%26sort%3D%26dir%3Dasc%26tab%3Dimagestab%26theilerStageFilter%3D12%26theilerStageFilter%3D13%26theilerStageFilter%3D14%26wildtypeFilter%3Dwild%20type
DLK1	0.871893	43.0462	0	0	2.37152	TRUE	0.80395	37.4663	1.62826e-307	2.66261e-305	0.0635655	2.96019	0.00153722	0.03113	14	291	259	116	25	12	12	0	14	14	14	0		Forebrain (Anterior and Posterior)	No images	NA	NA	No images	NA	Dlk1	delta like non-canonical Notch ligand 1	protein coding gene	http://www.informatics.jax.org/gxd/marker/MGI:94900?tab=imagestab#gxd=markerMgiId%3DMGI%3A102764%26theilerStage%3D%26assayType%3D%26results%3D25%26startIndex%3D0%26sort%3D%26dir%3Dasc%26tab%3Dimagestab%26theilerStageFilter%3D12%26theilerStageFilter%3D13%26theilerStageFilter%3D14%26wildtypeFilter%3Dwild%20type
NR2E1	0.86741	50.6557	0	0	1.50938	TRUE	0.639362	34.9559	5.26547e-268	7.59737e-266	0.0413609	2.26205	0.0118473	0.184948	3	825	281	64	2	27	1	7	7	3	3	0		Forebrain (Anterior and Posterior)	No images	NA	NA	No images	NA	Nr2e1	nuclear receptor subfamily 2, group E, meMB/R1er 1	protein coding gene	http://www.informatics.jax.org/gxd/marker/MGI:1100526?tab=imagestab#gxd=markerMgiId%3DMGI%3A102764%26theilerStage%3D%26assayType%3D%26results%3D25%26startIndex%3D0%26sort%3D%26dir%3Dasc%26tab%3Dimagestab%26theilerStageFilter%3D12%26theilerStageFilter%3D13%26theilerStageFilter%3D14%26wildtypeFilter%3Dwild%20type
DMRT3	0.884083	48.3629	0	0	1.5011	TRUE	0.594671	30.6672	7.80131e-207	9.75064e-205	0.183915	9.49659	1.08438e-21	6.60832e-20	3	554	56	114	2	27	1	7	7	3	3	0		Forebrain (Anterior and Posterior)	FB	Yes	NA	Could not determine	NA	Dmrt3	doublesex and mab-3 related transcription factor 3	protein coding gene	http://www.informatics.jax.org/gxd/marker/MGI:2449470?tab=imagestab#gxd=markerMgiId%3DMGI%3A102764%26theilerStage%3D%26assayType%3D%26results%3D25%26startIndex%3D0%26sort%3D%26dir%3Dasc%26tab%3Dimagestab%26theilerStageFilter%3D12%26theilerStageFilter%3D13%26theilerStageFilter%3D14%26wildtypeFilter%3Dwild%20type
WNT5B	0.914901	33.7004	2.85371e-249	1.83001e-247	1.62662	TRUE	0.869085	29.9457	2.50546e-197	3.01624e-195	0.0810533	2.79167	0.00262183	0.0499498	3	486	184	59	16	16	4	10	21	3	3	0		Forebrain (Anterior and Posterior)	Could not determine	NA	NA	Could not determine	NA	Wnt5b	wingless-type MMTV integration site family, meMB/R1er 5B	protein coding gene	http://www.informatics.jax.org/gxd/marker/MGI:98959?tab=imagestab#gxd=markerMgiId%3DMGI%3A102764%26theilerStage%3D%26assayType%3D%26results%3D25%26startIndex%3D0%26sort%3D%26dir%3Dasc%26tab%3Dimagestab%26theilerStageFilter%3D12%26theilerStageFilter%3D13%26theilerStageFilter%3D14%26wildtypeFilter%3Dwild%20type
SRCIN1	0.869291	35.4456	1.6953e-275	1.15912e-273	1.74321	TRUE	0.763527	29.1113	1.29047e-186	1.4984e-184	0.0678848	2.58763	0.00483193	0.0860063	3	611	184	59	16	16	4	10	21	3	3	0		Forebrain (Anterior and Posterior)	No images	NA	NA	No images	NA	Srcin1	SRC kinase signaling inhibitor 1	protein coding gene	http://www.informatics.jax.org/gxd/marker/MGI:1933179?tab=imagestab#gxd=markerMgiId%3DMGI%3A102764%26theilerStage%3D%26assayType%3D%26results%3D25%26startIndex%3D0%26sort%3D%26dir%3Dasc%26tab%3Dimagestab%26theilerStageFilter%3D12%26theilerStageFilter%3D13%26theilerStageFilter%3D14%26wildtypeFilter%3Dwild%20type
CERS4	0.885418	37.6539	0	0	1.93718	TRUE	0.653646	25.9407	1.15704e-148	1.19498e-146	0.288296	11.4757	8.73829e-31	6.67204e-29	4	482	55	84	35	8	0	4	19	1	4	0	5	Forebrain (Anterior and Posterior)	No images	NA	High midline	No images	NA	Cers4	ceramide synthase 4	protein coding gene	http://www.informatics.jax.org/gxd/marker/MGI:1914510?tab=imagestab#gxd=markerMgiId%3DMGI%3A102764%26theilerStage%3D%26assayType%3D%26results%3D25%26startIndex%3D0%26sort%3D%26dir%3Dasc%26tab%3Dimagestab%26theilerStageFilter%3D12%26theilerStageFilter%3D13%26theilerStageFilter%3D14%26wildtypeFilter%3Dwild%20type
DMRTA1	0.87714	40.4325	0	0	1.42073	TRUE	0.592636	25.8191	2.7087e-147	2.75404e-145	0.103741	4.51683	3.13868e-06	9.15161e-05	14	808	139	74	23	12	12	0	14	14	14	0		Forebrain (Anterior and Posterior)	No images	NA	NA	No images	NA	Dmrta1	doublesex and mab-3 related transcription factor like family A1	protein coding gene	http://www.informatics.jax.org/gxd/marker/MGI:2653627?tab=imagestab#gxd=markerMgiId%3DMGI%3A102764%26theilerStage%3D%26assayType%3D%26results%3D25%26startIndex%3D0%26sort%3D%26dir%3Dasc%26tab%3Dimagestab%26theilerStageFilter%3D12%26theilerStageFilter%3D13%26theilerStageFilter%3D14%26wildtypeFilter%3Dwild%20type
MIP	0.936831	29.005	2.84725e-185	1.60091e-183	1.20209	TRUE	0.871892	25.2791	2.7136e-141	2.73071e-139	0.057387	1.66497	0.0479597	0.50035	14	675	51	104	25	12	12	0	14	14	14	0		Forebrain (Anterior and Posterior)	No images	NA	NA	No images	NA	Mip	major intrinsic protein of lens fiber	protein coding gene	http://www.informatics.jax.org/gxd/marker/MGI:96990?tab=imagestab#gxd=markerMgiId%3DMGI%3A102764%26theilerStage%3D%26assayType%3D%26results%3D25%26startIndex%3D0%26sort%3D%26dir%3Dasc%26tab%3Dimagestab%26theilerStageFilter%3D12%26theilerStageFilter%3D13%26theilerStageFilter%3D14%26wildtypeFilter%3Dwild%20type
SHH	0.91671	383.457	0	0	3.16043	TRUE	0.0613141	23.3633	5.0496e-121	4.76387e-119	0.884705	338.587	0	0	9	1	113	113	27	25	25	25	9	9	9	0	6	Forebrain (Anterior and Posterior)	Global (maybe FB biased)	No	High midline	Midline	Yes	Shh	sonic hedgehog	protein coding gene	http://www.informatics.jax.org/gxd/marker/MGI:98297?tab=imagestab#gxd=markerMgiId%3DMGI%3A102764%26theilerStage%3D%26assayType%3D%26results%3D25%26startIndex%3D0%26sort%3D%26dir%3Dasc%26tab%3Dimagestab%26theilerStageFilter%3D12%26theilerStageFilter%3D13%26theilerStageFilter%3D14%26wildtypeFilter%3Dwild%20type
SCUBE2	0.813145	35.2041	8.65872e-272	5.87924e-270	1.95618	TRUE	0.558167	22.5979	2.27217e-113	2.0738e-111	0.118592	4.81144	7.49241e-07	2.29009e-05	3	758	243	64	2	27	1	7	7	3	3	0		Forebrain (Anterior and Posterior)	FB	Yes	NA	Midline excluded	NA	Scube2	signal peptide, CUB domain, EGF-like 2	protein coding gene	http://www.informatics.jax.org/gxd/marker/MGI:1928765?tab=imagestab#gxd=markerMgiId%3DMGI%3A102764%26theilerStage%3D%26assayType%3D%26results%3D25%26startIndex%3D0%26sort%3D%26dir%3Dasc%26tab%3Dimagestab%26theilerStageFilter%3D12%26theilerStageFilter%3D13%26theilerStageFilter%3D14%26wildtypeFilter%3Dwild%20type
GAP43	0.901139	27.1133	3.43229e-162	1.79127e-160	1.9142	TRUE	0.769291	21.8144	8.46016e-106	7.54608e-104	0.0918251	2.60533	0.00458935	0.0822437	14	634	51	104	25	12	12	0	14	14	14	0		Forebrain (Anterior and Posterior)	No images	NA	NA	No images	NA	Gap43	growth associated protein 43	protein coding gene	http://www.informatics.jax.org/gxd/marker/MGI:95639?tab=imagestab#gxd=markerMgiId%3DMGI%3A102764%26theilerStage%3D%26assayType%3D%26results%3D25%26startIndex%3D0%26sort%3D%26dir%3Dasc%26tab%3Dimagestab%26theilerStageFilter%3D12%26theilerStageFilter%3D13%26theilerStageFilter%3D14%26wildtypeFilter%3Dwild%20type
SOX9	0.849033	30.0424	1.37246e-198	8.06344e-197	2.64099	TRUE	0.64015	21.2564	1.43847e-100	1.26014e-98	0.12554	4.17286	1.50402e-05	0.000404849	14	593	128	48	23	12	12	0	14	14	14	0		Forebrain (Anterior and Posterior)	Could not determine	NA	NA	Could not determine	NA	Sox9	SRY (sex determining region Y)-box 9	protein coding gene	http://www.informatics.jax.org/gxd/marker/MGI:98371?tab=imagestab#gxd=markerMgiId%3DMGI%3A102764%26theilerStage%3D%26assayType%3D%26results%3D25%26startIndex%3D0%26sort%3D%26dir%3Dasc%26tab%3Dimagestab%26theilerStageFilter%3D12%26theilerStageFilter%3D13%26theilerStageFilter%3D14%26wildtypeFilter%3Dwild%20type
KRT18	0.832499	51.8949	0	0	2.69065	TRUE	0.352369	20.26	1.44886e-91	1.19954e-89	0.430465	24.8068	3.78963e-136	8.08304e-134	4	639	116	50	35	8	0	4	19	1	4	0	6	Forebrain (Anterior and Posterior)	Could not determine	NA	High midline	Could not determine	NA	Krt18	keratin 18	protein coding gene	http://www.informatics.jax.org/gxd/marker/MGI:96692?tab=imagestab#gxd=markerMgiId%3DMGI%3A102764%26theilerStage%3D%26assayType%3D%26results%3D25%26startIndex%3D0%26sort%3D%26dir%3Dasc%26tab%3Dimagestab%26theilerStageFilter%3D12%26theilerStageFilter%3D13%26theilerStageFilter%3D14%26wildtypeFilter%3Dwild%20type
BMP7	0.905702	37.2716	2.36835e-304	1.68997e-302	1.53797	TRUE	0.490804	18.6377	7.93947e-78	5.90137e-76	0.422707	16.0992	1.29181e-58	1.46527e-56	4	627	55	84	35	8	0	4	19	1	4	0	0	Forebrain (Anterior and Posterior)	FB	Yes	High midline	High midline in FB, lateral elsewhere	No	Bmp7	bone morphogenetic protein 7	protein coding gene	http://www.informatics.jax.org/gxd/marker/MGI:103302?tab=imagestab#gxd=markerMgiId%3DMGI%3A102764%26theilerStage%3D%26assayType%3D%26results%3D25%26startIndex%3D0%26sort%3D%26dir%3Dasc%26tab%3Dimagestab%26theilerStageFilter%3D12%26theilerStageFilter%3D13%26theilerStageFilter%3D14%26wildtypeFilter%3Dwild%20type
MIAT	0.734691	21.7029	9.63525e-105	4.00577e-103	1.92986	TRUE	0.629605	17.5269	4.46753e-69	3.14216e-67	0.0477011	1.32936	0.0918646	0.50035	4	734	187	57	57	7	0	4	19	1	4	0		Forebrain (Anterior and Posterior)	No images	NA	NA	No images	NA	Miat	myocardial infarction associated transcript (non-protein coding)	lncRNA gene	http://www.informatics.jax.org/gxd/marker/MGI:2444886?tab=imagestab#gxd=markerMgiId%3DMGI%3A102764%26theilerStage%3D%26assayType%3D%26results%3D25%26startIndex%3D0%26sort%3D%26dir%3Dasc%26tab%3Dimagestab%26theilerStageFilter%3D12%26theilerStageFilter%3D13%26theilerStageFilter%3D14%26wildtypeFilter%3Dwild%20type
NEFH	0.829388	21.258	1.39043e-100	5.62565e-99	1.69867	TRUE	0.714522	17.1382	3.85176e-66	2.66138e-64	0.0662205	1.58905	0.0560246	0.50035	14	802	173	35	25	12	12	0	14	14	14	0		Forebrain (Anterior and Posterior)	No images	NA	NA	No images	NA	Nefh	neurofilament, heavy polypeptide	protein coding gene	http://www.informatics.jax.org/gxd/marker/MGI:97309?tab=imagestab#gxd=markerMgiId%3DMGI%3A102764%26theilerStage%3D%26assayType%3D%26results%3D25%26startIndex%3D0%26sort%3D%26dir%3Dasc%26tab%3Dimagestab%26theilerStageFilter%3D12%26theilerStageFilter%3D13%26theilerStageFilter%3D14%26wildtypeFilter%3Dwild%20type
CAR2	0.857472	28.4131	6.96648e-178	3.85079e-176	2.12512	TRUE	0.539794	16.8955	2.42729e-64	1.64812e-62	0.162055	5.06643	2.02675e-07	6.50916e-06	14	556	156	39	8	6	28	0	14	14	14	0		Forebrain (Anterior and Posterior)	No images	NA	NA	No images	NA	Car2	carbonic anhydrase 2	protein coding gene	http://www.informatics.jax.org/gxd/marker/MGI:88269?tab=imagestab#gxd=markerMgiId%3DMGI%3A102764%26theilerStage%3D%26assayType%3D%26results%3D25%26startIndex%3D0%26sort%3D%26dir%3Dasc%26tab%3Dimagestab%26theilerStageFilter%3D12%26theilerStageFilter%3D13%26theilerStageFilter%3D14%26wildtypeFilter%3Dwild%20type
OAF	0.870349	19.6539	2.67686e-86	9.85515e-85	1.52785	TRUE	0.796701	16.8698	3.75206e-64	2.53885e-62	0.0592131	1.25179	0.105323	0.50035	14	335	173	35	25	12	12	0	14	14	14	0		Forebrain (Anterior and Posterior)	No images	NA	NA	No images	NA	Oaf	out at first homolog	protein coding gene	http://www.informatics.jax.org/gxd/marker/MGI:94852?tab=imagestab#gxd=markerMgiId%3DMGI%3A102764%26theilerStage%3D%26assayType%3D%26results%3D25%26startIndex%3D0%26sort%3D%26dir%3Dasc%26tab%3Dimagestab%26theilerStageFilter%3D12%26theilerStageFilter%3D13%26theilerStageFilter%3D14%26wildtypeFilter%3Dwild%20type
VEGFC	0.889819	23.0355	1.02694e-117	4.59036e-116	1.38907	TRUE	0.689578	16.6027	3.3302e-62	2.20772e-60	0.111613	2.685	0.00362651	0.0668197	14	473	139	74	23	12	12	0	14	14	14	0		Forebrain (Anterior and Posterior)	Could not determine	NA	NA	Could not determine	NA	Vegfc	vascular endothelial growth factor C	protein coding gene	http://www.informatics.jax.org/gxd/marker/MGI:109124?tab=imagestab#gxd=markerMgiId%3DMGI%3A102764%26theilerStage%3D%26assayType%3D%26results%3D25%26startIndex%3D0%26sort%3D%26dir%3Dasc%26tab%3Dimagestab%26theilerStageFilter%3D12%26theilerStageFilter%3D13%26theilerStageFilter%3D14%26wildtypeFilter%3Dwild%20type
E330013P04RIK	0.868924	25.5292	4.67169e-144	2.30333e-142	1.12508	TRUE	0.574902	16.4925	2.07586e-61	1.36693e-59	0.122019	3.50809	0.000225669	0.00520977	14	810	53	74	23	12	12	0	14	14	14	0		Forebrain (Anterior and Posterior)	No images	NA	NA	No images	NA	E330013P04Rik	RIKEN cDNA E330013P04 gene	lncRNA gene	http://www.informatics.jax.org/gxd/marker/MGI:2147732?tab=imagestab#gxd=markerMgiId%3DMGI%3A102764%26theilerStage%3D%26assayType%3D%26results%3D25%26startIndex%3D0%26sort%3D%26dir%3Dasc%26tab%3Dimagestab%26theilerStageFilter%3D12%26theilerStageFilter%3D13%26theilerStageFilter%3D14%26wildtypeFilter%3Dwild%20type
ALPL	0.868515	20.1381	1.71178e-90	6.44728e-89	1.70543	TRUE	0.734281	15.8465	7.42897e-57	4.73308e-55	0.13372	2.88332	0.00196757	0.0388817	14	626	173	35	25	12	12	0	14	14	14	0		Forebrain (Anterior and Posterior)	Could not determine	NA	NA	Could not determine	NA	Alpl	alkaline phosphatase, liver/bone/kidney	protein coding gene	http://www.informatics.jax.org/gxd/marker/MGI:87983?tab=imagestab#gxd=markerMgiId%3DMGI%3A102764%26theilerStage%3D%26assayType%3D%26results%3D25%26startIndex%3D0%26sort%3D%26dir%3Dasc%26tab%3Dimagestab%26theilerStageFilter%3D12%26theilerStageFilter%3D13%26theilerStageFilter%3D14%26wildtypeFilter%3Dwild%20type
TNNT1	0.909667	17.3489	1.0051e-67	3.27627e-66	1.47909	TRUE	0.87351	15.5692	5.8971e-55	3.67361e-53	0.0421335	0.751399	0.226206	0.50035	14	736	173	35	25	12	12	0	14	14	14	0		Forebrain (Anterior and Posterior)	No images	NA	NA	No images	NA	Tnnt1	troponin T1, skeletal, slow	protein coding gene	http://www.informatics.jax.org/gxd/marker/MGI:1333868?tab=imagestab#gxd=markerMgiId%3DMGI%3A102764%26theilerStage%3D%26assayType%3D%26results%3D25%26startIndex%3D0%26sort%3D%26dir%3Dasc%26tab%3Dimagestab%26theilerStageFilter%3D12%26theilerStageFilter%3D13%26theilerStageFilter%3D14%26wildtypeFilter%3Dwild%20type
NRIP3	0.773958	22.0357	6.55031e-108	2.7583e-106	1.32112	TRUE	0.569628	15.1459	4.02988e-52	2.44825e-50	0.0715477	1.90868	0.028152	0.373385	3	470	243	64	2	27	1	7	7	3	3	0		Forebrain (Anterior and Posterior)	No images	NA	NA	No images	NA	Nrip3	nuclear receptor interacting protein 3	protein coding gene	http://www.informatics.jax.org/gxd/marker/MGI:1925843?tab=imagestab#gxd=markerMgiId%3DMGI%3A102764%26theilerStage%3D%26assayType%3D%26results%3D25%26startIndex%3D0%26sort%3D%26dir%3Dasc%26tab%3Dimagestab%26theilerStageFilter%3D12%26theilerStageFilter%3D13%26theilerStageFilter%3D14%26wildtypeFilter%3Dwild%20type
RASGRP2	0.897059	19.2399	8.57737e-83	3.07142e-81	1.75558	TRUE	0.750542	15.0527	1.6568e-51	9.9728e-50	0.05435	1.08925	0.138022	0.50035	14	285	288	118	52	6	28	0	14	14	14	0		Forebrain (Anterior and Posterior)	No images	NA	NA	No images	NA	Rasgrp2	RAS, guanyl releasing protein 2	protein coding gene	http://www.informatics.jax.org/gxd/marker/MGI:1333849?tab=imagestab#gxd=markerMgiId%3DMGI%3A102764%26theilerStage%3D%26assayType%3D%26results%3D25%26startIndex%3D0%26sort%3D%26dir%3Dasc%26tab%3Dimagestab%26theilerStageFilter%3D12%26theilerStageFilter%3D13%26theilerStageFilter%3D14%26wildtypeFilter%3Dwild%20type
SPINT2	0.864692	19.3542	9.38964e-84	3.40578e-82	1.87858	TRUE	0.701383	14.7107	2.75159e-49	1.6362e-47	0.114369	2.40112	0.00817241	0.134423	14	797	51	104	25	12	12	0	14	14	14	0		Forebrain (Anterior and Posterior)	FB	Yes	NA	No images	NA	Spint2	serine protease inhibitor, Kunitz type 2	protein coding gene	http://www.informatics.jax.org/gxd/marker/MGI:1338031?tab=imagestab#gxd=markerMgiId%3DMGI%3A102764%26theilerStage%3D%26assayType%3D%26results%3D25%26startIndex%3D0%26sort%3D%26dir%3Dasc%26tab%3Dimagestab%26theilerStageFilter%3D12%26theilerStageFilter%3D13%26theilerStageFilter%3D14%26wildtypeFilter%3Dwild%20type
CNKSR2	0.847069	22.6907	2.76924e-114	1.21568e-112	1.47008	TRUE	0.588862	14.6782	4.4491e-49	2.6376e-47	0.273299	6.83062	4.22746e-12	1.78016e-10	4	357	55	84	35	8	0	4	19	1	4	0		Forebrain (Anterior and Posterior)	No images	NA	NA	No images	NA	Cnksr2	connector enhancer of kinase suppressor of Ras 2	protein coding gene	http://www.informatics.jax.org/gxd/marker/MGI:2661175?tab=imagestab#gxd=markerMgiId%3DMGI%3A102764%26theilerStage%3D%26assayType%3D%26results%3D25%26startIndex%3D0%26sort%3D%26dir%3Dasc%26tab%3Dimagestab%26theilerStageFilter%3D12%26theilerStageFilter%3D13%26theilerStageFilter%3D14%26wildtypeFilter%3Dwild%20type
MAOB	0.855313	20.539	4.82428e-94	1.87831e-92	1.48025	TRUE	0.65148	14.5884	1.66476e-48	9.8101e-47	0.124449	2.78986	0.00263655	0.0501813	14	788	23	48	23	12	12	0	14	14	14	0		Forebrain (Anterior and Posterior)	Could not determine	NA	NA	Could not determine	NA	Maob	monoamine oxidase B	protein coding gene	http://www.informatics.jax.org/gxd/marker/MGI:96916?tab=imagestab#gxd=markerMgiId%3DMGI%3A102764%26theilerStage%3D%26assayType%3D%26results%3D25%26startIndex%3D0%26sort%3D%26dir%3Dasc%26tab%3Dimagestab%26theilerStageFilter%3D12%26theilerStageFilter%3D13%26theilerStageFilter%3D14%26wildtypeFilter%3Dwild%20type
ADA	0.862156	21.2457	1.80476e-100	7.28698e-99	1.27375	TRUE	0.611148	14.2798	1.46233e-46	8.46471e-45	0.137693	3.21559	0.000650884	0.013793	14	354	53	74	23	12	12	0	14	14	14	0		Forebrain (Anterior and Posterior)	No images	NA	NA	No images	NA	Ada	adenosine deaminase	protein coding gene	http://www.informatics.jax.org/gxd/marker/MGI:87916?tab=imagestab#gxd=markerMgiId%3DMGI%3A102764%26theilerStage%3D%26assayType%3D%26results%3D25%26startIndex%3D0%26sort%3D%26dir%3Dasc%26tab%3Dimagestab%26theilerStageFilter%3D12%26theilerStageFilter%3D13%26theilerStageFilter%3D14%26wildtypeFilter%3Dwild%20type
CALCA	0.923999	231.621	0	0	2.98156	TRUE	0.063122	14.2787	1.48576e-46	8.57501e-45	0.872438	198.292	0	0	9	858	113	113	27	25	25	25	9	9	9	0	6	Forebrain (Anterior and Posterior)	Strong FB, MB/R1, HB	No	High midline	Midline	Yes	Calca	calcitonin/calcitonin-related polypeptide, alpha	protein coding gene	http://www.informatics.jax.org/gxd/marker/MGI:2151253?tab=imagestab#gxd=markerMgiId%3DMGI%3A102764%26theilerStage%3D%26assayType%3D%26results%3D25%26startIndex%3D0%26sort%3D%26dir%3Dasc%26tab%3Dimagestab%26theilerStageFilter%3D12%26theilerStageFilter%3D13%26theilerStageFilter%3D14%26wildtypeFilter%3Dwild%20type
STK26	0.845345	21.0093	2.69843e-98	1.07844e-96	1.55256	TRUE	0.559285	13.1045	1.55223e-39	8.23228e-38	0.137183	3.22033	0.000640212	0.0135815	14	360	128	48	23	12	12	0	14	14	14	0		Forebrain (Anterior and Posterior)	No images	NA	NA	No images	NA	Stk26	serine/threonine kinase 26	protein coding gene	http://www.informatics.jax.org/gxd/marker/MGI:1917665?tab=imagestab#gxd=markerMgiId%3DMGI%3A102764%26theilerStage%3D%26assayType%3D%26results%3D25%26startIndex%3D0%26sort%3D%26dir%3Dasc%26tab%3Dimagestab%26theilerStageFilter%3D12%26theilerStageFilter%3D13%26theilerStageFilter%3D14%26wildtypeFilter%3Dwild%20type
CHST15	0.762634	16.4848	2.35826e-61	7.39234e-60	1.26116	TRUE	0.619501	13.0788	2.17694e-39	1.15143e-37	0.103696	2.19995	0.0139054	0.212017	14	378	89	74	23	12	12	0	14	14	14	0		Forebrain (Anterior and Posterior)	No images	NA	NA	No images	NA	Chst15	carbohydrate sulfotransferase 15	protein coding gene	http://www.informatics.jax.org/gxd/marker/MGI:1924840?tab=imagestab#gxd=markerMgiId%3DMGI%3A102764%26theilerStage%3D%26assayType%3D%26results%3D25%26startIndex%3D0%26sort%3D%26dir%3Dasc%26tab%3Dimagestab%26theilerStageFilter%3D12%26theilerStageFilter%3D13%26theilerStageFilter%3D14%26wildtypeFilter%3Dwild%20type
TRIL	0.84403	22.6393	8.8878e-114	3.89298e-112	1.57142	TRUE	0.505171	12.6705	4.30959e-37	2.1852e-35	0.380706	9.57121	5.28316e-22	3.26011e-20	4	696	55	84	35	8	0	4	19	1	4	0		Forebrain (Anterior and Posterior)	No images	NA	NA	No images	NA	Tril	TLR4 interactor with leucine-rich repeats	protein coding gene	http://www.informatics.jax.org/gxd/marker/MGI:1914123?tab=imagestab#gxd=markerMgiId%3DMGI%3A102764%26theilerStage%3D%26assayType%3D%26results%3D25%26startIndex%3D0%26sort%3D%26dir%3Dasc%26tab%3Dimagestab%26theilerStageFilter%3D12%26theilerStageFilter%3D13%26theilerStageFilter%3D14%26wildtypeFilter%3Dwild%20type
DEPDC7	0.872636	22.4514	6.20255e-112	2.68681e-110	1.61837	TRUE	0.525466	12.6117	9.09653e-37	4.58872e-35	0.328435	7.89844	1.41203e-15	6.72531e-14	4	568	147	84	35	8	0	4	19	1	4	0		Forebrain (Anterior and Posterior)	No images	NA	NA	No images	NA	Depdc7	DEP domain containing 7	protein coding gene	http://www.informatics.jax.org/gxd/marker/MGI:2139258?tab=imagestab#gxd=markerMgiId%3DMGI%3A102764%26theilerStage%3D%26assayType%3D%26results%3D25%26startIndex%3D0%26sort%3D%26dir%3Dasc%26tab%3Dimagestab%26theilerStageFilter%3D12%26theilerStageFilter%3D13%26theilerStageFilter%3D14%26wildtypeFilter%3Dwild%20type
PCSK2	0.861165	15.6083	3.19739e-55	9.53532e-54	1.23648	TRUE	0.734414	12.5816	1.3335e-36	6.69238e-35	0.0736249	1.26236	0.10341	0.50035	14	750	89	74	23	12	12	0	14	14	14	0		Forebrain (Anterior and Posterior)	No images	NA	NA	No images	NA	Pcsk2	proprotein convertase subtilisin/kexin type 2	protein coding gene	http://www.informatics.jax.org/gxd/marker/MGI:97512?tab=imagestab#gxd=markerMgiId%3DMGI%3A102764%26theilerStage%3D%26assayType%3D%26results%3D25%26startIndex%3D0%26sort%3D%26dir%3Dasc%26tab%3Dimagestab%26theilerStageFilter%3D12%26theilerStageFilter%3D13%26theilerStageFilter%3D14%26wildtypeFilter%3Dwild%20type
GSC	0.882701	76.8263	0	0	1.75042	TRUE	0.152717	12.5491	2.00955e-36	1.00595e-34	0.595347	49.1823	0	0	9	640	123	61	61	14	14	14	9	9	9	0	3	Forebrain (Anterior and Posterior)	FB	Yes	NA	Midline	NA	Gsc	goosecoid homeobox	protein coding gene	http://www.informatics.jax.org/gxd/marker/MGI:95841?tab=imagestab#gxd=markerMgiId%3DMGI%3A102764%26theilerStage%3D%26assayType%3D%26results%3D25%26startIndex%3D0%26sort%3D%26dir%3Dasc%26tab%3Dimagestab%26theilerStageFilter%3D12%26theilerStageFilter%3D13%26theilerStageFilter%3D14%26wildtypeFilter%3Dwild%20type
TOX3	0.896036	16.6151	2.7083e-62	8.55796e-61	2.6965	TRUE	0.698901	12.3475	2.5114e-35	1.21382e-33	0.103706	1.83291	0.0334081	0.427778	4	315	178	57	57	7	0	4	19	1	4	0		Forebrain (Anterior and Posterior)	No images	NA	NA	No images	NA	Tox3	TOX high mobility group box family meMB/R1er 3	protein coding gene	http://www.informatics.jax.org/gxd/marker/MGI:3039593?tab=imagestab#gxd=markerMgiId%3DMGI%3A102764%26theilerStage%3D%26assayType%3D%26results%3D25%26startIndex%3D0%26sort%3D%26dir%3Dasc%26tab%3Dimagestab%26theilerStageFilter%3D12%26theilerStageFilter%3D13%26theilerStageFilter%3D14%26wildtypeFilter%3Dwild%20type
GRTP1	0.876927	13.8738	4.56835e-44	1.19367e-42	1.73083	TRUE	0.820324	12.192	1.71353e-34	8.12189e-33	0.0717072	1.06468	0.143511	0.50035	14	209	173	35	25	12	12	0	14	14	14	0		Forebrain (Anterior and Posterior)	No images	NA	NA	No images	NA	Grtp1	GH regulated TBC protein 1	protein coding gene	http://www.informatics.jax.org/gxd/marker/MGI:1914040?tab=imagestab#gxd=markerMgiId%3DMGI%3A102764%26theilerStage%3D%26assayType%3D%26results%3D25%26startIndex%3D0%26sort%3D%26dir%3Dasc%26tab%3Dimagestab%26theilerStageFilter%3D12%26theilerStageFilter%3D13%26theilerStageFilter%3D14%26wildtypeFilter%3Dwild%20type
MCF2	0.851741	14.0083	6.93769e-45	1.8472e-43	1.36219	TRUE	0.78257	12.1484	2.92453e-34	1.37952e-32	0.0605261	0.939801	0.17366	0.50035	4	170	140	57	57	7	0	4	19	1	4	0		Forebrain (Anterior and Posterior)	No images	NA	NA	No images	NA	Mcf2	mcf.2 transforming sequence	protein coding gene	http://www.informatics.jax.org/gxd/marker/MGI:96932?tab=imagestab#gxd=markerMgiId%3DMGI%3A102764%26theilerStage%3D%26assayType%3D%26results%3D25%26startIndex%3D0%26sort%3D%26dir%3Dasc%26tab%3Dimagestab%26theilerStageFilter%3D12%26theilerStageFilter%3D13%26theilerStageFilter%3D14%26wildtypeFilter%3Dwild%20type
ZFP365	0.784956	14.1145	1.54512e-45	4.13077e-44	1.33018	TRUE	0.690702	11.7231	4.85029e-32	2.26074e-30	0.0592173	1.00642	0.157107	0.50035	14	194	173	35	25	12	12	0	14	14	14	0		Forebrain (Anterior and Posterior)	No images	NA	NA	No images	NA	Zfp365	zinc finger protein 365	protein coding gene	http://www.informatics.jax.org/gxd/marker/MGI:2143676?tab=imagestab#gxd=markerMgiId%3DMGI%3A102764%26theilerStage%3D%26assayType%3D%26results%3D25%26startIndex%3D0%26sort%3D%26dir%3Dasc%26tab%3Dimagestab%26theilerStageFilter%3D12%26theilerStageFilter%3D13%26theilerStageFilter%3D14%26wildtypeFilter%3Dwild%20type
CHCHD10	0.877835	15.0473	1.79673e-51	5.1697e-50	1.29999	TRUE	0.729979	11.6694	9.13399e-32	4.23727e-30	0.0804	1.28628	0.0991731	0.50035	14	87	288	118	52	6	28	0	14	14	14	0		Forebrain (Anterior and Posterior)	No images	NA	NA	No images	NA	Chchd10	coiled-coil-helix-coiled-coil-helix domain containing 10	protein coding gene	http://www.informatics.jax.org/gxd/marker/MGI:2143558?tab=imagestab#gxd=markerMgiId%3DMGI%3A102764%26theilerStage%3D%26assayType%3D%26results%3D25%26startIndex%3D0%26sort%3D%26dir%3Dasc%26tab%3Dimagestab%26theilerStageFilter%3D12%26theilerStageFilter%3D13%26theilerStageFilter%3D14%26wildtypeFilter%3Dwild%20type
SPON1	0.841736	37.9543	0	0	2.52369	TRUE	0.266123	11.4828	8.04846e-31	3.6559e-29	0.482241	20.8636	5.73493e-97	9.53699e-95	9	557	278	96	43	14	14	14	9	9	9	0	4	Forebrain (Anterior and Posterior)	No images	NA	High midline	No images	NA	Spon1	spondin 1, (f-spondin) extracellular matrix protein	protein coding gene	http://www.informatics.jax.org/gxd/marker/MGI:2385287?tab=imagestab#gxd=markerMgiId%3DMGI%3A102764%26theilerStage%3D%26assayType%3D%26results%3D25%26startIndex%3D0%26sort%3D%26dir%3Dasc%26tab%3Dimagestab%26theilerStageFilter%3D12%26theilerStageFilter%3D13%26theilerStageFilter%3D14%26wildtypeFilter%3Dwild%20type
SPEG	0.876053	15.3989	8.31962e-54	2.45129e-52	1.57732	TRUE	0.679973	11.1229	4.85436e-29	2.13103e-27	0.233985	3.83119	6.37636e-05	0.00159393	4	374	86	57	57	7	0	4	19	1	4	0		Forebrain (Anterior and Posterior)	No images	NA	NA	No images	NA	Speg	SPEG complex locus	protein coding gene	http://www.informatics.jax.org/gxd/marker/MGI:109282?tab=imagestab#gxd=markerMgiId%3DMGI%3A102764%26theilerStage%3D%26assayType%3D%26results%3D25%26startIndex%3D0%26sort%3D%26dir%3Dasc%26tab%3Dimagestab%26theilerStageFilter%3D12%26theilerStageFilter%3D13%26theilerStageFilter%3D14%26wildtypeFilter%3Dwild%20type
NKX2-9	0.905593	196.13	0	0	3.29807	TRUE	0.0532706	10.9403	3.69765e-28	1.5947e-26	0.857526	176.87	0	0	9	498	127	15	31	25	25	25	9	9	9	0	4	Forebrain (Anterior and Posterior)	Strong FB, MB/R1	Yes	High midline	Midline	Yes	Nkx2-9	NK2 homeobox 9	protein coding gene	http://www.informatics.jax.org/gxd/marker/MGI:1270158?tab=imagestab#gxd=markerMgiId%3DMGI%3A102764%26theilerStage%3D%26assayType%3D%26results%3D25%26startIndex%3D0%26sort%3D%26dir%3Dasc%26tab%3Dimagestab%26theilerStageFilter%3D12%26theilerStageFilter%3D13%26theilerStageFilter%3D14%26wildtypeFilter%3Dwild%20type
FILIP1	0.757833	21.4077	5.66202e-102	2.30989e-100	1.46477	TRUE	0.411789	10.9172	4.7683e-28	2.05194e-26	0.13854	3.67147	0.000120578	0.00291034	14	389	23	48	23	12	12	0	14	14	14	0		Forebrain (Anterior and Posterior)	No images	NA	NA	No images	NA	Filip1	filamin A interacting protein 1	protein coding gene	http://www.informatics.jax.org/gxd/marker/MGI:1917848?tab=imagestab#gxd=markerMgiId%3DMGI%3A102764%26theilerStage%3D%26assayType%3D%26results%3D25%26startIndex%3D0%26sort%3D%26dir%3Dasc%26tab%3Dimagestab%26theilerStageFilter%3D12%26theilerStageFilter%3D13%26theilerStageFilter%3D14%26wildtypeFilter%3Dwild%20type
PARVB	0.883736	14.1401	1.07494e-45	2.87771e-44	1.14562	TRUE	0.717654	10.7075	4.69294e-27	1.95519e-25	0.165263	2.46979	0.00675963	0.114645	4	310	38	58	26	7	0	4	19	1	4	0		Forebrain (Anterior and Posterior)	No images	NA	NA	No images	NA	Parvb	parvin, beta	protein coding gene	http://www.informatics.jax.org/gxd/marker/MGI:2153063?tab=imagestab#gxd=markerMgiId%3DMGI%3A102764%26theilerStage%3D%26assayType%3D%26results%3D25%26startIndex%3D0%26sort%3D%26dir%3Dasc%26tab%3Dimagestab%26theilerStageFilter%3D12%26theilerStageFilter%3D13%26theilerStageFilter%3D14%26wildtypeFilter%3Dwild%20type
NXPH1	0.834686	14.0596	3.36291e-45	8.97827e-44	1.0262	TRUE	0.66907	10.6626	7.61708e-27	3.14673e-25	0.0904746	1.44384	0.0743917	0.50035	4	133	292	108	26	7	0	4	19	1	4	0		Forebrain (Anterior and Posterior)	No images	NA	NA	No images	NA	Nxph1	neurexophilin 1	protein coding gene	http://www.informatics.jax.org/gxd/marker/MGI:107492?tab=imagestab#gxd=markerMgiId%3DMGI%3A102764%26theilerStage%3D%26assayType%3D%26results%3D25%26startIndex%3D0%26sort%3D%26dir%3Dasc%26tab%3Dimagestab%26theilerStageFilter%3D12%26theilerStageFilter%3D13%26theilerStageFilter%3D14%26wildtypeFilter%3Dwild%20type
QPRT	0.895674	12.0808	6.67086e-34	1.50423e-32	1.62177	TRUE	0.839455	10.5553	2.40091e-26	9.83573e-25	0.0250536	0.314754	0.376474	0.50035	14	377	173	35	25	12	12	0	14	14	14	0		Forebrain (Anterior and Posterior)	No images	NA	NA	No images	NA	Qprt	quinolinate phosphoribosyltransferase	protein coding gene	http://www.informatics.jax.org/gxd/marker/MGI:1914625?tab=imagestab#gxd=markerMgiId%3DMGI%3A102764%26theilerStage%3D%26assayType%3D%26results%3D25%26startIndex%3D0%26sort%3D%26dir%3Dasc%26tab%3Dimagestab%26theilerStageFilter%3D12%26theilerStageFilter%3D13%26theilerStageFilter%3D14%26wildtypeFilter%3Dwild%20type
LRRTM3	0.82819	16.5983	3.5821e-62	1.13009e-60	1.67649	TRUE	0.554425	10.3532	2.02421e-25	8.15626e-24	0.0867169	1.62263	0.0523341	0.50035	14	105	23	48	23	12	12	0	14	14	14	0		Forebrain (Anterior and Posterior)	No images	NA	NA	No images	NA	Lrrtm3	leucine rich repeat transmeMB/R1rane neuronal 3	protein coding gene	http://www.informatics.jax.org/gxd/marker/MGI:2389177?tab=imagestab#gxd=markerMgiId%3DMGI%3A102764%26theilerStage%3D%26assayType%3D%26results%3D25%26startIndex%3D0%26sort%3D%26dir%3Dasc%26tab%3Dimagestab%26theilerStageFilter%3D12%26theilerStageFilter%3D13%26theilerStageFilter%3D14%26wildtypeFilter%3Dwild%20type
SYT11	0.729284	12.7423	1.72123e-37	4.10396e-36	2.4855	TRUE	0.620665	10.1834	1.17594e-24	4.67116e-23	0.035031	0.574394	0.282851	0.50035	4	121	187	57	57	7	0	4	19	1	4	0		Forebrain (Anterior and Posterior)	No images	NA	NA	No images	NA	Syt11	synaptotagmin XI	protein coding gene	http://www.informatics.jax.org/gxd/marker/MGI:1859547?tab=imagestab#gxd=markerMgiId%3DMGI%3A102764%26theilerStage%3D%26assayType%3D%26results%3D25%26startIndex%3D0%26sort%3D%26dir%3Dasc%26tab%3Dimagestab%26theilerStageFilter%3D12%26theilerStageFilter%3D13%26theilerStageFilter%3D14%26wildtypeFilter%3Dwild%20type
BATF3	0.747199	13.1393	9.80478e-40	2.40199e-38	1.21166	TRUE	0.625079	10.1743	1.29145e-24	5.11961e-23	0.0500001	0.815264	0.207461	0.50035	14	128	151	35	25	12	12	0	14	14	14	0		Forebrain (Anterior and Posterior)	No images	NA	NA	No images	NA	Batf3	basic leucine zipper transcription factor, ATF-like 3	protein coding gene	http://www.informatics.jax.org/gxd/marker/MGI:1925491?tab=imagestab#gxd=markerMgiId%3DMGI%3A102764%26theilerStage%3D%26assayType%3D%26results%3D25%26startIndex%3D0%26sort%3D%26dir%3Dasc%26tab%3Dimagestab%26theilerStageFilter%3D12%26theilerStageFilter%3D13%26theilerStageFilter%3D14%26wildtypeFilter%3Dwild%20type
NEXN	0.822699	12.8526	4.15585e-38	9.98167e-37	1.69886	TRUE	0.685437	10.1434	1.77291e-24	6.99462e-23	0.0459873	0.679832	0.248305	0.50035	4	364	236	108	26	7	0	4	19	1	4	0		Forebrain (Anterior and Posterior)	No images	NA	NA	No images	NA	Nexn	nexilin	protein coding gene	http://www.informatics.jax.org/gxd/marker/MGI:1916060?tab=imagestab#gxd=markerMgiId%3DMGI%3A102764%26theilerStage%3D%26assayType%3D%26results%3D25%26startIndex%3D0%26sort%3D%26dir%3Dasc%26tab%3Dimagestab%26theilerStageFilter%3D12%26theilerStageFilter%3D13%26theilerStageFilter%3D14%26wildtypeFilter%3Dwild%20type
IGFBP3	0.844498	13.9751	1.1059e-44	2.92468e-43	1.7269	TRUE	0.627845	10.022	6.10151e-24	2.3756e-22	0.175707	2.80866	0.00248741	0.0478066	14	241	89	74	23	12	12	0	14	14	14	0		Forebrain (Anterior and Posterior)	Could not determine	NA	NA	Could not determine	NA	Igfbp3	insulin-like growth factor binding protein 3	protein coding gene	http://www.informatics.jax.org/gxd/marker/MGI:96438?tab=imagestab#gxd=markerMgiId%3DMGI%3A102764%26theilerStage%3D%26assayType%3D%26results%3D25%26startIndex%3D0%26sort%3D%26dir%3Dasc%26tab%3Dimagestab%26theilerStageFilter%3D12%26theilerStageFilter%3D13%26theilerStageFilter%3D14%26wildtypeFilter%3Dwild%20type
IRX3	0.955559	174.326	0	0	2.95019	TRUE	0.891048	151.501	0	0	0.0759597	12.9139	1.87854e-38	1.64566e-36	7	3	299	13	0	22	22	22	0	7	7	1	2	Strong Hindbrain and Weaker Midbrain/R1	MB/R1, HB	Yes	Midline excluded	Midline excluded	Yes	Irx3	Iroquois related homeobox 3	protein coding gene	http://www.informatics.jax.org/gxd/marker/MGI:1197522?tab=imagestab#gxd=markerMgiId%3DMGI%3A102764%26theilerStage%3D%26assayType%3D%26results%3D25%26startIndex%3D0%26sort%3D%26dir%3Dasc%26tab%3Dimagestab%26theilerStageFilter%3D12%26theilerStageFilter%3D13%26theilerStageFilter%3D14%26wildtypeFilter%3Dwild%20type
IRX5	0.952587	146.912	0	0	2.69303	TRUE	0.874194	125.735	0	0	0.100355	14.425	1.80126e-47	1.77618e-45	7	3	299	13	0	22	22	22	0	7	7	1	2	Strong Hindbrain and Weaker Midbrain/R1	No images	NA	Midline excluded	No images	NA	Irx5	Iroquois homeobox 5	protein coding gene	http://www.informatics.jax.org/gxd/marker/MGI:1859086?tab=imagestab#gxd=markerMgiId%3DMGI%3A102764%26theilerStage%3D%26assayType%3D%26results%3D25%26startIndex%3D0%26sort%3D%26dir%3Dasc%26tab%3Dimagestab%26theilerStageFilter%3D12%26theilerStageFilter%3D13%26theilerStageFilter%3D14%26wildtypeFilter%3Dwild%20type
IRX2	0.941125	138.394	0	0	2.82127	TRUE	0.844887	116.475	0	0	0.0781518	10.7627	2.5825e-27	1.79703e-25	7	677	34	13	0	22	22	22	0	7	7	1	2	Strong Hindbrain and Weaker Midbrain/R1	MB/R1, HB	Yes	Midline excluded	Midline excluded	Yes	Irx2	Iroquois homeobox 2	protein coding gene	http://www.informatics.jax.org/gxd/marker/MGI:1197526?tab=imagestab#gxd=markerMgiId%3DMGI%3A102764%26theilerStage%3D%26assayType%3D%26results%3D25%26startIndex%3D0%26sort%3D%26dir%3Dasc%26tab%3Dimagestab%26theilerStageFilter%3D12%26theilerStageFilter%3D13%26theilerStageFilter%3D14%26wildtypeFilter%3Dwild%20type
FABP7	0.936388	103.961	0	0	2.27471	TRUE	0.868342	90.3376	0	0	0.114055	11.8679	8.69016e-33	6.90392e-31	7	747	40	71	0	22	22	22	0	7	7	1	2	Strong Hindbrain and Weaker Midbrain/R1	MB/R1, HB	Yes	Midline excluded	Could not determine	NA	Fabp7	fatty acid binding protein 7, brain	protein coding gene	http://www.informatics.jax.org/gxd/marker/MGI:101916?tab=imagestab#gxd=markerMgiId%3DMGI%3A102764%26theilerStage%3D%26assayType%3D%26results%3D25%26startIndex%3D0%26sort%3D%26dir%3Dasc%26tab%3Dimagestab%26theilerStageFilter%3D12%26theilerStageFilter%3D13%26theilerStageFilter%3D14%26wildtypeFilter%3Dwild%20type
RFX4	0.92478	97.3469	0	0	2.65902	TRUE	0.781673	76.064	0	0	0.164393	16.0079	5.62542e-58	6.30787e-56	7	435	217	77	24	19	19	19	0	7	7	1	0	Strong Hindbrain and Weaker Midbrain/R1	MB/R1, HB	Yes	High midline	Global	No	Rfx4	regulatory factor X, 4 (influences HLA class II expression)	protein coding gene	http://www.informatics.jax.org/gxd/marker/MGI:1918387?tab=imagestab#gxd=markerMgiId%3DMGI%3A102764%26theilerStage%3D%26assayType%3D%26results%3D25%26startIndex%3D0%26sort%3D%26dir%3Dasc%26tab%3Dimagestab%26theilerStageFilter%3D12%26theilerStageFilter%3D13%26theilerStageFilter%3D14%26wildtypeFilter%3Dwild%20type
GBX2	0.890478	86.7401	0	0	2.20285	TRUE	0.826503	74.8711	0	0	0.108861	9.87458	2.68273e-23	1.72037e-21	7	419	40	71	0	22	22	22	0	7	7	1		Strong Hindbrain and Weaker Midbrain/R1	MB/R1, HB	Yes	NA	Could not determine	NA	Gbx2	gastrulation brain homeobox 2	protein coding gene	http://www.informatics.jax.org/gxd/marker/MGI:95668?tab=imagestab#gxd=markerMgiId%3DMGI%3A102764%26theilerStage%3D%26assayType%3D%26results%3D25%26startIndex%3D0%26sort%3D%26dir%3Dasc%26tab%3Dimagestab%26theilerStageFilter%3D12%26theilerStageFilter%3D13%26theilerStageFilter%3D14%26wildtypeFilter%3Dwild%20type
EFNB1	0.917284	67.5064	0	0	2.56744	TRUE	0.819643	56.4317	0	0	0.0570859	3.93157	4.21958e-05	0.00107673	7	432	176	30	62	19	19	19	0	7	7	1		Strong Hindbrain and Weaker Midbrain/R1	MB/R1, HB	Yes	NA	Midline excluded	NA	Efnb1	ephrin B1	protein coding gene	http://www.informatics.jax.org/gxd/marker/MGI:102708?tab=imagestab#gxd=markerMgiId%3DMGI%3A102764%26theilerStage%3D%26assayType%3D%26results%3D25%26startIndex%3D0%26sort%3D%26dir%3Dasc%26tab%3Dimagestab%26theilerStageFilter%3D12%26theilerStageFilter%3D13%26theilerStageFilter%3D14%26wildtypeFilter%3Dwild%20type
NR2F1	0.921233	76.6113	0	0	3.56987	TRUE	0.69242	53.941	0	0	0.193076	15.0347	2.17659e-51	2.25985e-49	7	515	257	13	0	22	22	22	0	7	7	1	2	Strong Hindbrain and Weaker Midbrain/R1	Could not determine	NA	Midline excluded	Could not determine	NA	Nr2f1	nuclear receptor subfamily 2, group F, meMB/R1er 1	protein coding gene	http://www.informatics.jax.org/gxd/marker/MGI:1352451?tab=imagestab#gxd=markerMgiId%3DMGI%3A102764%26theilerStage%3D%26assayType%3D%26results%3D25%26startIndex%3D0%26sort%3D%26dir%3Dasc%26tab%3Dimagestab%26theilerStageFilter%3D12%26theilerStageFilter%3D13%26theilerStageFilter%3D14%26wildtypeFilter%3Dwild%20type
RBP1	0.917316	58.6813	0	0	2.99745	TRUE	0.859818	51.5943	0	0	0.0830935	4.98895	3.0354e-07	9.57615e-06	7	843	40	71	0	22	22	22	0	7	7	1		Strong Hindbrain and Weaker Midbrain/R1	MB/R1, HB	Yes	NA	Global	NA	Rbp1	retinol binding protein 1, cellular	protein coding gene	http://www.informatics.jax.org/gxd/marker/MGI:97876?tab=imagestab#gxd=markerMgiId%3DMGI%3A102764%26theilerStage%3D%26assayType%3D%26results%3D25%26startIndex%3D0%26sort%3D%26dir%3Dasc%26tab%3Dimagestab%26theilerStageFilter%3D12%26theilerStageFilter%3D13%26theilerStageFilter%3D14%26wildtypeFilter%3Dwild%20type
FEZ1	0.933166	58.4815	0	0	2.3111	TRUE	0.832609	48.809	0	0	0.107994	6.33091	1.21861e-10	4.78254e-09	13	681	49	5	48	2	27	27	6	13	13	1		Strong Hindbrain and Weaker Midbrain/R1	No images	NA	NA	No images	NA	Fez1	fasciculation and elongation protein zeta 1 (zygin I)	protein coding gene	http://www.informatics.jax.org/gxd/marker/MGI:2670976?tab=imagestab#gxd=markerMgiId%3DMGI%3A102764%26theilerStage%3D%26assayType%3D%26results%3D25%26startIndex%3D0%26sort%3D%26dir%3Dasc%26tab%3Dimagestab%26theilerStageFilter%3D12%26theilerStageFilter%3D13%26theilerStageFilter%3D14%26wildtypeFilter%3Dwild%20type
FZD10	0.87369	64.3345	0	0	1.91114	TRUE	0.667829	46.1915	0	0	0.148867	10.2986	3.57526e-25	2.39445e-23	7	777	90	30	62	19	19	19	0	7	7	1	2	Strong Hindbrain and Weaker Midbrain/R1	MB/R1, HB	Yes	Midline excluded	Could not determine	NA	Fzd10	frizzled class receptor 10	protein coding gene	http://www.informatics.jax.org/gxd/marker/MGI:2136761?tab=imagestab#gxd=markerMgiId%3DMGI%3A102764%26theilerStage%3D%26assayType%3D%26results%3D25%26startIndex%3D0%26sort%3D%26dir%3Dasc%26tab%3Dimagestab%26theilerStageFilter%3D12%26theilerStageFilter%3D13%26theilerStageFilter%3D14%26wildtypeFilter%3Dwild%20type
EPB41L4A	0.90384	62.8891	0	0	1.98393	TRUE	0.63942	41.5744	0	0	0.347321	22.5672	4.54795e-113	8.66451e-111	0	352	65	9	7	15	15	2	13	0	0	1	0	Strong Hindbrain and Weaker Midbrain/R1	No images	NA	High midline	No images	NA	Epb41l4a	erythrocyte meMB/R1rane protein band 4.1 like 4a	protein coding gene	http://www.informatics.jax.org/gxd/marker/MGI:103007?tab=imagestab#gxd=markerMgiId%3DMGI%3A102764%26theilerStage%3D%26assayType%3D%26results%3D25%26startIndex%3D0%26sort%3D%26dir%3Dasc%26tab%3Dimagestab%26theilerStageFilter%3D12%26theilerStageFilter%3D13%26theilerStageFilter%3D14%26wildtypeFilter%3Dwild%20type
NKX6-2	0.815569	65.6519	0	0	2.91151	TRUE	0.524007	41.4961	0	0	0.165997	13.1467	8.89221e-40	7.85999e-38	13	748	186	42	9	2	27	27	6	13	13	1	3	Strong Hindbrain and Weaker Midbrain/R1	MB/R1, HB	Yes	NA	Could not determine	NA	Nkx6-2	NK6 homeobox 2	protein coding gene	http://www.informatics.jax.org/gxd/marker/MGI:1352738?tab=imagestab#gxd=markerMgiId%3DMGI%3A102764%26theilerStage%3D%26assayType%3D%26results%3D25%26startIndex%3D0%26sort%3D%26dir%3Dasc%26tab%3Dimagestab%26theilerStageFilter%3D12%26theilerStageFilter%3D13%26theilerStageFilter%3D14%26wildtypeFilter%3Dwild%20type
BOC	0.889524	52.5835	0	0	1.78114	TRUE	0.7258	40.9746	0	0	0.117063	6.59832	2.07922e-11	8.48244e-10	7	617	3	30	62	19	19	19	0	7	7	1		Strong Hindbrain and Weaker Midbrain/R1	MB/R1, HB	Yes	NA	High lateral	NA	Boc	biregional cell adhesion molecule-related/down-regulated by oncogenes (Cdon) binding protein	protein coding gene	http://www.informatics.jax.org/gxd/marker/MGI:2151153?tab=imagestab#gxd=markerMgiId%3DMGI%3A102764%26theilerStage%3D%26assayType%3D%26results%3D25%26startIndex%3D0%26sort%3D%26dir%3Dasc%26tab%3Dimagestab%26theilerStageFilter%3D12%26theilerStageFilter%3D13%26theilerStageFilter%3D14%26wildtypeFilter%3Dwild%20type
NRP2	0.845164	74.0079	0	0	3.63375	TRUE	0.452194	37.0328	1.70158e-300	2.7369e-298	0.24162	19.75	4.01307e-87	6.05758e-85	0	629	13	0	7	15	15	2	13	0	0	1	2	Strong Hindbrain and Weaker Midbrain/R1	No images	NA	Midline excluded	No images	NA	Nrp2	neuropilin 2	protein coding gene	http://www.informatics.jax.org/gxd/marker/MGI:1100492?tab=imagestab#gxd=markerMgiId%3DMGI%3A102764%26theilerStage%3D%26assayType%3D%26results%3D25%26startIndex%3D0%26sort%3D%26dir%3Dasc%26tab%3Dimagestab%26theilerStageFilter%3D12%26theilerStageFilter%3D13%26theilerStageFilter%3D14%26wildtypeFilter%3Dwild%20type
HES5	0.872561	62.1874	0	0	3.64769	TRUE	0.537721	35.8413	1.25836e-281	1.92913e-279	0.145917	9.71878	1.25379e-22	7.88563e-21	13	589	294	5	48	2	27	27	6	13	13	1		Strong Hindbrain and Weaker Midbrain/R1	MB/R1, HB	Yes	NA	Could not determine	NA	Hes5	hes family bHLH transcription factor 5	protein coding gene	http://www.informatics.jax.org/gxd/marker/MGI:104876?tab=imagestab#gxd=markerMgiId%3DMGI%3A102764%26theilerStage%3D%26assayType%3D%26results%3D25%26startIndex%3D0%26sort%3D%26dir%3Dasc%26tab%3Dimagestab%26theilerStageFilter%3D12%26theilerStageFilter%3D13%26theilerStageFilter%3D14%26wildtypeFilter%3Dwild%20type
MYCL	0.928191	43.8835	0	0	2.30038	TRUE	0.810337	35.6323	2.21772e-278	3.34757e-276	0.0340947	1.49845	0.0670081	0.50035	13	529	11	5	48	2	27	27	6	13	13	1		Strong Hindbrain and Weaker Midbrain/R1	No images	NA	NA	No images	NA	Mycl	v-myc avian myelocytomatosis viral oncogene lung carcinoma derived	protein coding gene	http://www.informatics.jax.org/gxd/marker/MGI:96799?tab=imagestab#gxd=markerMgiId%3DMGI%3A102764%26theilerStage%3D%26assayType%3D%26results%3D25%26startIndex%3D0%26sort%3D%26dir%3Dasc%26tab%3Dimagestab%26theilerStageFilter%3D12%26theilerStageFilter%3D13%26theilerStageFilter%3D14%26wildtypeFilter%3Dwild%20type
FGF15	0.879421	49.2623	0	0	2.8959	TRUE	0.678142	35.514	1.4921e-276	2.23508e-274	0.22472	11.7734	2.67766e-32	2.11019e-30	13	571	285	73	6	28	6	6	6	13	13	1	2	Strong Hindbrain and Weaker Midbrain/R1	ANR, MB/R1, HB	Yes	Midline excluded	Midline excluded	Yes	Fgf15	fibroblast growth factor 15	protein coding gene	http://www.informatics.jax.org/gxd/marker/MGI:1096383?tab=imagestab#gxd=markerMgiId%3DMGI%3A102764%26theilerStage%3D%26assayType%3D%26results%3D25%26startIndex%3D0%26sort%3D%26dir%3Dasc%26tab%3Dimagestab%26theilerStageFilter%3D12%26theilerStageFilter%3D13%26theilerStageFilter%3D14%26wildtypeFilter%3Dwild%20type
PTN	0.891429	41.5038	0	0	3.70211	TRUE	0.777165	33.6988	3.01422e-249	4.19489e-247	0.169749	7.36336	8.96657e-14	4.05417e-12	7	835	34	13	0	22	22	22	0	7	7	1		Strong Hindbrain and Weaker Midbrain/R1	No images	NA	NA	No images	NA	Ptn	pleiotrophin	protein coding gene	http://www.informatics.jax.org/gxd/marker/MGI:97804?tab=imagestab#gxd=markerMgiId%3DMGI%3A102764%26theilerStage%3D%26assayType%3D%26results%3D25%26startIndex%3D0%26sort%3D%26dir%3Dasc%26tab%3Dimagestab%26theilerStageFilter%3D12%26theilerStageFilter%3D13%26theilerStageFilter%3D14%26wildtypeFilter%3Dwild%20type
JAG1	0.833407	47.5627	0	0	2.54037	TRUE	0.624282	33.1015	1.41161e-240	1.92361e-238	0.142678	7.5604	2.00923e-14	9.29887e-13	13	623	11	5	48	2	27	27	6	13	13	1		Strong Hindbrain and Weaker Midbrain/R1	MB/R1, HB	Yes	NA	Midline excluded	NA	Jag1	jagged 1	protein coding gene	http://www.informatics.jax.org/gxd/marker/MGI:1095416?tab=imagestab#gxd=markerMgiId%3DMGI%3A102764%26theilerStage%3D%26assayType%3D%26results%3D25%26startIndex%3D0%26sort%3D%26dir%3Dasc%26tab%3Dimagestab%26theilerStageFilter%3D12%26theilerStageFilter%3D13%26theilerStageFilter%3D14%26wildtypeFilter%3Dwild%20type
SPRY2	0.817048	52.0018	0	0	2.71402	TRUE	0.523169	31.0747	2.6457e-212	3.3712e-210	0.161579	9.60873	3.67235e-22	2.29498e-20	2	495	247	69	69	23	23	23	1	2	2	1		Strong Hindbrain and Weaker Midbrain/R1	ANR, MB/R1, HB	Yes	NA	Could not determine	NA	Spry2	sprouty RTK signaling antagonist 2	protein coding gene	http://www.informatics.jax.org/gxd/marker/MGI:1345138?tab=imagestab#gxd=markerMgiId%3DMGI%3A102764%26theilerStage%3D%26assayType%3D%26results%3D25%26startIndex%3D0%26sort%3D%26dir%3Dasc%26tab%3Dimagestab%26theilerStageFilter%3D12%26theilerStageFilter%3D13%26theilerStageFilter%3D14%26wildtypeFilter%3Dwild%20type
CELSR1	0.844615	34.6756	9.20186e-264	6.12095e-262	1.9623	TRUE	0.785391	30.1849	1.86885e-200	2.29203e-198	0.0392903	1.51047	0.0654616	0.50035	7	709	168	88	24	19	19	19	0	7	7	1		Strong Hindbrain and Weaker Midbrain/R1	MB/R1, HB	Yes	NA	Global	NA	Celsr1	cadherin, EGF LAG seven-pass G-type receptor 1	protein coding gene	http://www.informatics.jax.org/gxd/marker/MGI:1100883?tab=imagestab#gxd=markerMgiId%3DMGI%3A102764%26theilerStage%3D%26assayType%3D%26results%3D25%26startIndex%3D0%26sort%3D%26dir%3Dasc%26tab%3Dimagestab%26theilerStageFilter%3D12%26theilerStageFilter%3D13%26theilerStageFilter%3D14%26wildtypeFilter%3Dwild%20type
EZR	0.921893	34.3638	4.3872e-259	2.90845e-257	2.82146	TRUE	0.849922	29.6066	6.13797e-193	7.29971e-191	0.0573098	1.99502	0.0230203	0.318341	7	648	176	30	62	19	19	19	0	7	7	1		Strong Hindbrain and Weaker Midbrain/R1	Could not determine	NA	NA	Could not determine	NA	Ezr	ezrin	protein coding gene	http://www.informatics.jax.org/gxd/marker/MGI:98931?tab=imagestab#gxd=markerMgiId%3DMGI%3A102764%26theilerStage%3D%26assayType%3D%26results%3D25%26startIndex%3D0%26sort%3D%26dir%3Dasc%26tab%3Dimagestab%26theilerStageFilter%3D12%26theilerStageFilter%3D13%26theilerStageFilter%3D14%26wildtypeFilter%3Dwild%20type
VIM	0.825675	70.2417	0	0	3.30882	TRUE	0.354524	28.1067	4.05861e-174	4.63035e-172	0.549076	43.6293	0	0	1	711	177	68	68	18	18	3	3	16	1	1	0	Strong Hindbrain and Weaker Midbrain/R1	Could not determine	NA	High midline	Could not determine	NA	Vim	vimentin	protein coding gene	http://www.informatics.jax.org/gxd/marker/MGI:98932?tab=imagestab#gxd=markerMgiId%3DMGI%3A102764%26theilerStage%3D%26assayType%3D%26results%3D25%26startIndex%3D0%26sort%3D%26dir%3Dasc%26tab%3Dimagestab%26theilerStageFilter%3D12%26theilerStageFilter%3D13%26theilerStageFilter%3D14%26wildtypeFilter%3Dwild%20type
FAM181A	0.902276	35.4796	5.06986e-276	3.47853e-274	1.68908	TRUE	0.752816	27.7643	5.86306e-170	6.57433e-168	0.140895	5.19282	1.03569e-07	3.37596e-06	13	603	49	5	48	2	27	27	6	13	13	1		Strong Hindbrain and Weaker Midbrain/R1	No images	NA	NA	No images	NA	Fam181a	family with sequence similarity 181, meMB/R1er A	protein coding gene	http://www.informatics.jax.org/gxd/marker/MGI:3647570?tab=imagestab#gxd=markerMgiId%3DMGI%3A102764%26theilerStage%3D%26assayType%3D%26results%3D25%26startIndex%3D0%26sort%3D%26dir%3Dasc%26tab%3Dimagestab%26theilerStageFilter%3D12%26theilerStageFilter%3D13%26theilerStageFilter%3D14%26wildtypeFilter%3Dwild%20type
COL2A1	0.914408	33.7245	1.26345e-249	8.1555e-248	2.27042	TRUE	0.782101	26.8856	1.61984e-159	1.76589e-157	0.0458379	1.57462	0.0576722	0.50035	7	637	176	30	62	19	19	19	0	7	7	1		Strong Hindbrain and Weaker Midbrain/R1	Could not determine	NA	NA	Could not determine	NA	Col2a1	collagen, type II, alpha 1	protein coding gene	http://www.informatics.jax.org/gxd/marker/MGI:88452?tab=imagestab#gxd=markerMgiId%3DMGI%3A102764%26theilerStage%3D%26assayType%3D%26results%3D25%26startIndex%3D0%26sort%3D%26dir%3Dasc%26tab%3Dimagestab%26theilerStageFilter%3D12%26theilerStageFilter%3D13%26theilerStageFilter%3D14%26wildtypeFilter%3Dwild%20type
NKX6-1	0.922532	146.534	0	0	2.9413	TRUE	0.179509	26.6116	2.49356e-156	2.68853e-154	0.743754	110.663	0	0	1	731	182	94	33	33	33	3	3	16	1	1	5	Strong Hindbrain and Weaker Midbrain/R1	MB/R1, HB	Yes	High midline	Could not determine	NA	Nkx6-1	NK6 homeobox 1	protein coding gene	http://www.informatics.jax.org/gxd/marker/MGI:1206039?tab=imagestab#gxd=markerMgiId%3DMGI%3A102764%26theilerStage%3D%26assayType%3D%26results%3D25%26startIndex%3D0%26sort%3D%26dir%3Dasc%26tab%3Dimagestab%26theilerStageFilter%3D12%26theilerStageFilter%3D13%26theilerStageFilter%3D14%26wildtypeFilter%3Dwild%20type
MN1	0.764084	33.7588	3.97559e-250	2.57469e-248	2.17259	TRUE	0.635955	26.3934	8.16735e-154	8.66313e-152	0.158175	6.55628	2.7583e-11	1.116e-09	13	460	209	73	6	28	6	6	6	13	13	1		Strong Hindbrain and Weaker Midbrain/R1	Could not determine	NA	NA	Could not determine	NA	Mn1	meningioma 1	protein coding gene	http://www.informatics.jax.org/gxd/marker/MGI:1261813?tab=imagestab#gxd=markerMgiId%3DMGI%3A102764%26theilerStage%3D%26assayType%3D%26results%3D25%26startIndex%3D0%26sort%3D%26dir%3Dasc%26tab%3Dimagestab%26theilerStageFilter%3D12%26theilerStageFilter%3D13%26theilerStageFilter%3D14%26wildtypeFilter%3Dwild%20type
GRIN2A	0.858269	34.3231	1.77403e-258	1.17212e-256	1.53054	TRUE	0.696292	25.8759	6.2192e-148	6.38949e-146	0.115937	4.31776	7.88102e-06	0.000218431	13	604	36	109	6	28	6	6	6	13	13	1		Strong Hindbrain and Weaker Midbrain/R1	No images	NA	NA	No images	NA	Grin2a	glutamate receptor, ionotropic, NMDA2A (epsilon 1)	protein coding gene	http://www.informatics.jax.org/gxd/marker/MGI:95820?tab=imagestab#gxd=markerMgiId%3DMGI%3A102764%26theilerStage%3D%26assayType%3D%26results%3D25%26startIndex%3D0%26sort%3D%26dir%3Dasc%26tab%3Dimagestab%26theilerStageFilter%3D12%26theilerStageFilter%3D13%26theilerStageFilter%3D14%26wildtypeFilter%3Dwild%20type
FOXB1	0.865356	51.6767	0	0	2.87689	TRUE	0.433628	24.433	3.81552e-132	3.68828e-130	0.249755	14.0805	2.50099e-45	2.32592e-43	13	467	233	25	9	2	27	27	6	13	13	1	4	Strong Hindbrain and Weaker Midbrain/R1	MB/R1, HB	Yes	High midline	Midline	Yes	Foxb1	forkhead box B1	protein coding gene	http://www.informatics.jax.org/gxd/marker/MGI:1927549?tab=imagestab#gxd=markerMgiId%3DMGI%3A102764%26theilerStage%3D%26assayType%3D%26results%3D25%26startIndex%3D0%26sort%3D%26dir%3Dasc%26tab%3Dimagestab%26theilerStageFilter%3D12%26theilerStageFilter%3D13%26theilerStageFilter%3D14%26wildtypeFilter%3Dwild%20type
MLLT3	0.843559	30.3833	4.56327e-203	2.70529e-201	2.65268	TRUE	0.719631	24.0942	1.43672e-128	1.37526e-126	0.0411208	1.37826	0.0840617	0.50035	7	730	231	88	24	19	19	19	0	7	7	1		Strong Hindbrain and Weaker Midbrain/R1	MB/R1, HB	Yes	NA	Could not determine	NA	Mllt3	myeloid/lymphoid or mixed-lineage leukemia; translocated to, 3	protein coding gene	http://www.informatics.jax.org/gxd/marker/MGI:1917372?tab=imagestab#gxd=markerMgiId%3DMGI%3A102764%26theilerStage%3D%26assayType%3D%26results%3D25%26startIndex%3D0%26sort%3D%26dir%3Dasc%26tab%3Dimagestab%26theilerStageFilter%3D12%26theilerStageFilter%3D13%26theilerStageFilter%3D14%26wildtypeFilter%3Dwild%20type
CITED2	0.877158	27.4311	5.83508e-166	3.10303e-164	3.61932	TRUE	0.724644	21.3273	3.16719e-101	2.78699e-99	0.0731583	2.15475	0.0155906	0.232649	7	446	3	30	62	19	19	19	0	7	7	1		Strong Hindbrain and Weaker Midbrain/R1	MB/R1, HB	Yes	NA	Could not determine	NA	Cited2	Cbp/p300-interacting transactivator, with Glu/Asp-rich carboxy-terminal domain, 2	protein coding gene	http://www.informatics.jax.org/gxd/marker/MGI:1306784?tab=imagestab#gxd=markerMgiId%3DMGI%3A102764%26theilerStage%3D%26assayType%3D%26results%3D25%26startIndex%3D0%26sort%3D%26dir%3Dasc%26tab%3Dimagestab%26theilerStageFilter%3D12%26theilerStageFilter%3D13%26theilerStageFilter%3D14%26wildtypeFilter%3Dwild%20type
MYO5B	0.864333	29.7818	3.36371e-195	1.94708e-193	1.58401	TRUE	0.655849	20.9769	5.32804e-98	4.5656e-96	0.0878162	2.81259	0.00245723	0.0473656	13	530	36	109	6	28	6	6	6	13	13	1		Strong Hindbrain and Weaker Midbrain/R1	No images	NA	NA	No images	NA	Myo5b	myosin VB	protein coding gene	http://www.informatics.jax.org/gxd/marker/MGI:106598?tab=imagestab#gxd=markerMgiId%3DMGI%3A102764%26theilerStage%3D%26assayType%3D%26results%3D25%26startIndex%3D0%26sort%3D%26dir%3Dasc%26tab%3Dimagestab%26theilerStageFilter%3D12%26theilerStageFilter%3D13%26theilerStageFilter%3D14%26wildtypeFilter%3Dwild%20type
5930412G12RIK	0.911984	24.5791	1.05559e-133	4.96734e-132	1.26764	TRUE	0.804372	20.2601	1.44735e-91	1.19954e-89	0.0763314	1.92258	0.0272663	0.364473	13	264	148	56	6	28	6	6	6	13	13	1		Strong Hindbrain and Weaker Midbrain/R1	No images	NA	NA	No images	NA	Fzd10os	frizzled class receptor 10, opposite strand	lncRNA gene	http://www.informatics.jax.org/gxd/marker/MGI:2442398?tab=imagestab#gxd=markerMgiId%3DMGI%3A2442398%26theilerStage%3D%26assayType%3D%26results%3D25%26startIndex%3D0%26sort%3D%26dir%3Dasc%26tab%3Dimagestab%26theilerStageFilter%3D12%26theilerStageFilter%3D13%26theilerStageFilter%3D14%26wildtypeFilter%3Dwild%20type
AUTS2	0.890236	24.8455	1.44616e-136	6.93838e-135	2.79908	TRUE	0.755364	19.5401	2.50595e-85	1.99086e-83	0.131061	3.38841	0.000351493	0.0078647	7	462	168	88	24	19	19	19	0	7	7	1		Strong Hindbrain and Weaker Midbrain/R1	No images	NA	NA	No images	NA	Auts2	autism susceptibility candidate 2	protein coding gene	http://www.informatics.jax.org/gxd/marker/MGI:1919847?tab=imagestab#gxd=markerMgiId%3DMGI%3A102764%26theilerStage%3D%26assayType%3D%26results%3D25%26startIndex%3D0%26sort%3D%26dir%3Dasc%26tab%3Dimagestab%26theilerStageFilter%3D12%26theilerStageFilter%3D13%26theilerStageFilter%3D14%26wildtypeFilter%3Dwild%20type
SOX13	0.797626	23.8963	1.67162e-126	7.70003e-125	2.08261	TRUE	0.685419	19.2398	8.59328e-83	6.6915e-81	0.0811112	2.27729	0.0113846	0.179006	13	249	144	109	6	28	6	6	6	13	13	1		Strong Hindbrain and Weaker Midbrain/R1	No images	NA	NA	No images	NA	Sox13	SRY (sex determining region Y)-box 13	protein coding gene	http://www.informatics.jax.org/gxd/marker/MGI:98361?tab=imagestab#gxd=markerMgiId%3DMGI%3A102764%26theilerStage%3D%26assayType%3D%26results%3D25%26startIndex%3D0%26sort%3D%26dir%3Dasc%26tab%3Dimagestab%26theilerStageFilter%3D12%26theilerStageFilter%3D13%26theilerStageFilter%3D14%26wildtypeFilter%3Dwild%20type
MSX1	0.814696	55.4696	0	0	2.77009	TRUE	0.279007	18.8292	2.17551e-79	1.64193e-77	0.406447	27.4197	7.98391e-166	1.91059e-163	8	744	118	98	51	0	3	8	8	8	8	1	1	Strong Hindbrain and Weaker Midbrain/R1	MB/R1, HB	Yes	High lateral	Lateral	Yes	Msx1	msh homeobox 1	protein coding gene	http://www.informatics.jax.org/gxd/marker/MGI:97168?tab=imagestab#gxd=markerMgiId%3DMGI%3A102764%26theilerStage%3D%26assayType%3D%26results%3D25%26startIndex%3D0%26sort%3D%26dir%3Dasc%26tab%3Dimagestab%26theilerStageFilter%3D12%26theilerStageFilter%3D13%26theilerStageFilter%3D14%26wildtypeFilter%3Dwild%20type
NPAS3	0.773151	22.1197	1.02085e-108	4.32658e-107	1.45554	TRUE	0.659632	17.6209	8.5066e-70	6.04801e-68	0.106439	2.83875	0.00226456	0.0441562	0	692	260	36	5	1	17	17	17	0	0	1		Strong Hindbrain and Weaker Midbrain/R1	No images	NA	NA	No images	NA	Npas3	neuronal PAS domain protein 3	protein coding gene	http://www.informatics.jax.org/gxd/marker/MGI:1351610?tab=imagestab#gxd=markerMgiId%3DMGI%3A102764%26theilerStage%3D%26assayType%3D%26results%3D25%26startIndex%3D0%26sort%3D%26dir%3Dasc%26tab%3Dimagestab%26theilerStageFilter%3D12%26theilerStageFilter%3D13%26theilerStageFilter%3D14%26wildtypeFilter%3Dwild%20type
C130026L21RIK	0.917321	20.3563	2.04317e-92	7.86141e-91	1.61497	TRUE	0.843541	17.5434	3.34095e-69	2.35826e-67	0.034979	0.728463	0.233165	0.50035	13	642	148	56	6	28	6	6	6	13	13	1		Strong Hindbrain and Weaker Midbrain/R1	No images	NA	NA	No images	NA	C130026L21Rik	RIKEN cDNA C130026L21 gene	lncRNA gene	http://www.informatics.jax.org/gxd/marker/MGI:3041189?tab=imagestab#gxd=markerMgiId%3DMGI%3A102764%26theilerStage%3D%26assayType%3D%26results%3D25%26startIndex%3D0%26sort%3D%26dir%3Dasc%26tab%3Dimagestab%26theilerStageFilter%3D12%26theilerStageFilter%3D13%26theilerStageFilter%3D14%26wildtypeFilter%3Dwild%20type
ILDR2	0.744041	22.4592	5.1986e-112	2.2569e-110	2.8291	TRUE	0.60681	17.0669	1.30784e-65	8.97335e-64	0.0512212	1.44018	0.0749085	0.50035	7	293	231	88	24	19	19	19	0	7	7	1		Strong Hindbrain and Weaker Midbrain/R1	No images	NA	NA	No images	NA	Ildr2	immunoglobulin-like domain containing receptor 2	protein coding gene	http://www.informatics.jax.org/gxd/marker/MGI:1196370?tab=imagestab#gxd=markerMgiId%3DMGI%3A102764%26theilerStage%3D%26assayType%3D%26results%3D25%26startIndex%3D0%26sort%3D%26dir%3Dasc%26tab%3Dimagestab%26theilerStageFilter%3D12%26theilerStageFilter%3D13%26theilerStageFilter%3D14%26wildtypeFilter%3Dwild%20type
CHD3	0.878677	21.6719	1.88846e-104	7.83453e-103	2.35128	TRUE	0.732515	16.8147	9.52058e-64	6.42001e-62	0.0909886	2.08829	0.0183858	0.266065	13	356	209	73	6	28	6	6	6	13	13	1		Strong Hindbrain and Weaker Midbrain/R1	No images	NA	NA	No images	NA	Chd3	chromodomain helicase DNA binding protein 3	protein coding gene	http://www.informatics.jax.org/gxd/marker/MGI:1344395?tab=imagestab#gxd=markerMgiId%3DMGI%3A102764%26theilerStage%3D%26assayType%3D%26results%3D25%26startIndex%3D0%26sort%3D%26dir%3Dasc%26tab%3Dimagestab%26theilerStageFilter%3D12%26theilerStageFilter%3D13%26theilerStageFilter%3D14%26wildtypeFilter%3Dwild%20type
SHROOM3	0.856711	17.5841	1.63152e-69	5.39889e-68	1.92083	TRUE	0.758073	14.5475	3.02994e-48	1.78013e-46	0.145925	2.80123	0.00254538	0.0488249	13	472	76	73	6	28	6	6	6	13	13	1		Strong Hindbrain and Weaker Midbrain/R1	ANR, MB/R1, HB	Yes	NA	Could not determine	NA	Shroom3	shroom family meMB/R1er 3	protein coding gene	http://www.informatics.jax.org/gxd/marker/MGI:1351655?tab=imagestab#gxd=markerMgiId%3DMGI%3A102764%26theilerStage%3D%26assayType%3D%26results%3D25%26startIndex%3D0%26sort%3D%26dir%3Dasc%26tab%3Dimagestab%26theilerStageFilter%3D12%26theilerStageFilter%3D13%26theilerStageFilter%3D14%26wildtypeFilter%3Dwild%20type
RAI14	0.758698	19.189	2.28858e-82	8.1504e-81	2.0484	TRUE	0.575131	13.6385	1.18212e-42	6.53428e-41	0.136781	3.23879	0.000600185	0.0128155	13	340	209	73	6	28	6	6	6	13	13	1		Strong Hindbrain and Weaker Midbrain/R1	No images	NA	NA	No images	NA	Rai14	retinoic acid induced 14	protein coding gene	http://www.informatics.jax.org/gxd/marker/MGI:1922896?tab=imagestab#gxd=markerMgiId%3DMGI%3A102764%26theilerStage%3D%26assayType%3D%26results%3D25%26startIndex%3D0%26sort%3D%26dir%3Dasc%26tab%3Dimagestab%26theilerStageFilter%3D12%26theilerStageFilter%3D13%26theilerStageFilter%3D14%26wildtypeFilter%3Dwild%20type
ARHGAP29	0.771099	19.2883	3.36495e-83	1.20935e-81	2.22625	TRUE	0.585327	13.5931	2.19882e-42	1.21201e-40	0.185896	4.31548	7.96295e-06	0.000220391	13	728	209	73	6	28	6	6	6	13	13	1		Strong Hindbrain and Weaker Midbrain/R1	No images	NA	NA	No images	NA	Arhgap29	Rho GTPase activating protein 29	protein coding gene	http://www.informatics.jax.org/gxd/marker/MGI:2443818?tab=imagestab#gxd=markerMgiId%3DMGI%3A102764%26theilerStage%3D%26assayType%3D%26results%3D25%26startIndex%3D0%26sort%3D%26dir%3Dasc%26tab%3Dimagestab%26theilerStageFilter%3D12%26theilerStageFilter%3D13%26theilerStageFilter%3D14%26wildtypeFilter%3Dwild%20type
SPRED1	0.718709	20.2727	1.11953e-91	4.26575e-90	2.66308	TRUE	0.511654	13.4619	1.31098e-41	7.12613e-40	0.0504942	1.32976	0.0917986	0.50035	2	350	219	69	69	23	23	23	1	2	2	1		Strong Hindbrain and Weaker Midbrain/R1	No images	NA	NA	No images	NA	Spred1	sprouty protein with EVH-1 domain 1, related sequence	protein coding gene	http://www.informatics.jax.org/gxd/marker/MGI:2150016?tab=imagestab#gxd=markerMgiId%3DMGI%3A102764%26theilerStage%3D%26assayType%3D%26results%3D25%26startIndex%3D0%26sort%3D%26dir%3Dasc%26tab%3Dimagestab%26theilerStageFilter%3D12%26theilerStageFilter%3D13%26theilerStageFilter%3D14%26wildtypeFilter%3Dwild%20type
PAPPA	0.795851	17.4545	1.58974e-68	5.23412e-67	1.49141	TRUE	0.646253	13.3825	3.82812e-41	2.06371e-39	0.0535175	1.10845	0.133834	0.50035	13	318	239	56	6	28	6	6	6	13	13	1		Strong Hindbrain and Weaker Midbrain/R1	Could not determine	NA	NA	Could not determine	NA	Pappa	pregnancy-associated plasma protein A	protein coding gene	http://www.informatics.jax.org/gxd/marker/MGI:97479?tab=imagestab#gxd=markerMgiId%3DMGI%3A102764%26theilerStage%3D%26assayType%3D%26results%3D25%26startIndex%3D0%26sort%3D%26dir%3Dasc%26tab%3Dimagestab%26theilerStageFilter%3D12%26theilerStageFilter%3D13%26theilerStageFilter%3D14%26wildtypeFilter%3Dwild%20type
CERCAM	0.881715	16.0066	5.74499e-58	1.75872e-56	1.28255	TRUE	0.76405	12.8635	3.61234e-38	1.87032e-36	0.0660951	1.11347	0.132752	0.50035	2	331	195	119	30	9	10	21	1	2	2	1		Strong Hindbrain and Weaker Midbrain/R1	No images	NA	NA	No images	NA	Cercam	cerebral endothelial cell adhesion molecule	protein coding gene	http://www.informatics.jax.org/gxd/marker/MGI:2139134?tab=imagestab#gxd=markerMgiId%3DMGI%3A102764%26theilerStage%3D%26assayType%3D%26results%3D25%26startIndex%3D0%26sort%3D%26dir%3Dasc%26tab%3Dimagestab%26theilerStageFilter%3D12%26theilerStageFilter%3D13%26theilerStageFilter%3D14%26wildtypeFilter%3Dwild%20type
VSTM2B	0.866339	22.7744	4.11257e-115	1.82169e-113	2.47265	TRUE	0.521769	12.8165	6.62777e-38	3.40463e-36	0.196313	4.8215	7.12421e-07	2.18094e-05	13	226	143	25	9	2	27	27	6	13	13	1		Strong Hindbrain and Weaker Midbrain/R1	No images	NA	NA	No images	NA	Vstm2b	V-set and transmeMB/R1rane domain containing 2B	protein coding gene	http://www.informatics.jax.org/gxd/marker/MGI:1914525?tab=imagestab#gxd=markerMgiId%3DMGI%3A102764%26theilerStage%3D%26assayType%3D%26results%3D25%26startIndex%3D0%26sort%3D%26dir%3Dasc%26tab%3Dimagestab%26theilerStageFilter%3D12%26theilerStageFilter%3D13%26theilerStageFilter%3D14%26wildtypeFilter%3Dwild%20type
RASSF2	0.7831	15.4829	2.26195e-54	6.72518e-53	1.50828	TRUE	0.676596	12.4605	6.12774e-36	3.02883e-34	0.0521671	0.961682	0.168105	0.50035	13	448	239	56	6	28	6	6	6	13	13	1		Strong Hindbrain and Weaker Midbrain/R1	No images	NA	NA	No images	NA	Rassf2	Ras association (RalGDS/AF-6) domain family meMB/R1er 2	protein coding gene	http://www.informatics.jax.org/gxd/marker/MGI:2442060?tab=imagestab#gxd=markerMgiId%3DMGI%3A102764%26theilerStage%3D%26assayType%3D%26results%3D25%26startIndex%3D0%26sort%3D%26dir%3Dasc%26tab%3Dimagestab%26theilerStageFilter%3D12%26theilerStageFilter%3D13%26theilerStageFilter%3D14%26wildtypeFilter%3Dwild%20type
PTX3	0.830726	21.2865	7.57218e-101	3.07638e-99	1.33587	TRUE	0.516344	12.3713	1.86905e-35	9.10084e-34	0.330364	7.92226	1.16616e-15	5.62251e-14	0	206	67	10	5	1	17	17	17	0	0	1		Strong Hindbrain and Weaker Midbrain/R1	No images	NA	NA	No images	NA	Ptx3	pentraxin related gene	protein coding gene	http://www.informatics.jax.org/gxd/marker/MGI:104641?tab=imagestab#gxd=markerMgiId%3DMGI%3A102764%26theilerStage%3D%26assayType%3D%26results%3D25%26startIndex%3D0%26sort%3D%26dir%3Dasc%26tab%3Dimagestab%26theilerStageFilter%3D12%26theilerStageFilter%3D13%26theilerStageFilter%3D14%26wildtypeFilter%3Dwild%20type
PLP1	0.856837	17.3194	1.67868e-67	5.46282e-66	2.1867	TRUE	0.649551	12.3614	2.11292e-35	1.02628e-33	0.0746213	1.42141	0.077599	0.50035	13	273	36	109	6	28	6	6	6	13	13	1		Strong Hindbrain and Weaker Midbrain/R1	No images	NA	NA	No images	NA	Plp1	proteolipid protein (myelin) 1	protein coding gene	http://www.informatics.jax.org/gxd/marker/MGI:97623?tab=imagestab#gxd=markerMgiId%3DMGI%3A102764%26theilerStage%3D%26assayType%3D%26results%3D25%26startIndex%3D0%26sort%3D%26dir%3Dasc%26tab%3Dimagestab%26theilerStageFilter%3D12%26theilerStageFilter%3D13%26theilerStageFilter%3D14%26wildtypeFilter%3Dwild%20type
BEX3	0.633235	13.9284	2.1292e-44	5.60823e-43	2.34612	TRUE	0.560396	11.6272	1.4989e-31	6.92068e-30	0.110948	2.30322	0.0106333	0.169365	7	114	229	71	0	22	22	22	0	7	7	1		Strong Hindbrain and Weaker Midbrain/R1	No images	NA	NA	No images	NA	Bex3	brain expressed X-linked 3	protein coding gene	http://www.informatics.jax.org/gxd/marker/MGI:1338016?tab=imagestab#gxd=markerMgiId%3DMGI%3A102764%26theilerStage%3D%26assayType%3D%26results%3D25%26startIndex%3D0%26sort%3D%26dir%3Dasc%26tab%3Dimagestab%26theilerStageFilter%3D12%26theilerStageFilter%3D13%26theilerStageFilter%3D14%26wildtypeFilter%3Dwild%20type
SCRN1	0.905052	20.955	8.44294e-98	3.33352e-96	1.51155	TRUE	0.537627	11.5414	4.0789e-31	1.86613e-29	0.350967	7.55533	2.089e-14	9.64528e-13	1	686	92	78	13	18	18	3	3	16	1	1		Strong Hindbrain and Weaker Midbrain/R1	No images	NA	NA	No images	NA	Scrn1	secernin 1	protein coding gene	http://www.informatics.jax.org/gxd/marker/MGI:1917188?tab=imagestab#gxd=markerMgiId%3DMGI%3A102764%26theilerStage%3D%26assayType%3D%26results%3D25%26startIndex%3D0%26sort%3D%26dir%3Dasc%26tab%3Dimagestab%26theilerStageFilter%3D12%26theilerStageFilter%3D13%26theilerStageFilter%3D14%26wildtypeFilter%3Dwild%20type
NKAIN4	0.898571	14.8032	6.98283e-50	1.9631e-48	1.31301	TRUE	0.734588	11.2833	7.93727e-30	3.556e-28	0.231498	3.55446	0.000189376	0.00442397	13	328	83	56	6	28	6	6	6	13	13	1		Strong Hindbrain and Weaker Midbrain/R1	No images	NA	NA	No images	NA	Nkain4	Na+/K+ transporting ATPase interacting 4	protein coding gene	http://www.informatics.jax.org/gxd/marker/MGI:1915372?tab=imagestab#gxd=markerMgiId%3DMGI%3A102764%26theilerStage%3D%26assayType%3D%26results%3D25%26startIndex%3D0%26sort%3D%26dir%3Dasc%26tab%3Dimagestab%26theilerStageFilter%3D12%26theilerStageFilter%3D13%26theilerStageFilter%3D14%26wildtypeFilter%3Dwild%20type
SLC1A3	0.821794	13.508	7.0132e-42	1.77574e-40	1.49206	TRUE	0.716493	11.1509	3.54588e-29	1.56361e-27	0.153912	2.39783	0.00824634	0.135412	13	103	83	56	6	28	6	6	6	13	13	1		Strong Hindbrain and Weaker Midbrain/R1	No images	NA	NA	No images	NA	Slc1a3	solute carrier family 1 (glial high affinity glutamate transporter), meMB/R1er 3	protein coding gene	http://www.informatics.jax.org/gxd/marker/MGI:99917?tab=imagestab#gxd=markerMgiId%3DMGI%3A102764%26theilerStage%3D%26assayType%3D%26results%3D25%26startIndex%3D0%26sort%3D%26dir%3Dasc%26tab%3Dimagestab%26theilerStageFilter%3D12%26theilerStageFilter%3D13%26theilerStageFilter%3D14%26wildtypeFilter%3Dwild%20type
ZFP423	0.721923	17.4209	2.861e-68	9.38819e-67	2.04037	TRUE	0.489265	11.1	6.2744e-29	2.74215e-27	0.195387	4.43267	4.65362e-06	0.00013273	13	332	144	109	6	28	6	6	6	13	13	1		Strong Hindbrain and Weaker Midbrain/R1	Global	No	NA	Could not determine	NA	Zfp423	zinc finger protein 423	protein coding gene	http://www.informatics.jax.org/gxd/marker/MGI:1891217?tab=imagestab#gxd=markerMgiId%3DMGI%3A102764%26theilerStage%3D%26assayType%3D%26results%3D25%26startIndex%3D0%26sort%3D%26dir%3Dasc%26tab%3Dimagestab%26theilerStageFilter%3D12%26theilerStageFilter%3D13%26theilerStageFilter%3D14%26wildtypeFilter%3Dwild%20type
CACNA1G	0.794216	15.7326	4.519e-56	1.36215e-54	1.50178	TRUE	0.597696	10.9526	3.22777e-28	1.39512e-26	0.197944	3.62795	0.000142838	0.00340159	2	253	35	107	30	9	10	21	1	2	2	1		Strong Hindbrain and Weaker Midbrain/R1	No images	NA	NA	No images	NA	Cacna1g	calcium channel, voltage-dependent, T type, alpha 1G subunit	protein coding gene	http://www.informatics.jax.org/gxd/marker/MGI:1201678?tab=imagestab#gxd=markerMgiId%3DMGI%3A102764%26theilerStage%3D%26assayType%3D%26results%3D25%26startIndex%3D0%26sort%3D%26dir%3Dasc%26tab%3Dimagestab%26theilerStageFilter%3D12%26theilerStageFilter%3D13%26theilerStageFilter%3D14%26wildtypeFilter%3Dwild%20type
RGS2	0.770571	13.4879	9.21757e-42	2.33088e-40	1.91808	TRUE	0.653054	10.8589	9.0441e-28	3.82711e-26	0.0846936	1.40913	0.0793977	0.50035	13	140	148	56	6	28	6	6	6	13	13	1		Strong Hindbrain and Weaker Midbrain/R1	No images	NA	NA	No images	NA	Rgs2	regulator of G-protein signaling 2	protein coding gene	http://www.informatics.jax.org/gxd/marker/MGI:1098271?tab=imagestab#gxd=markerMgiId%3DMGI%3A102764%26theilerStage%3D%26assayType%3D%26results%3D25%26startIndex%3D0%26sort%3D%26dir%3Dasc%26tab%3Dimagestab%26theilerStageFilter%3D12%26theilerStageFilter%3D13%26theilerStageFilter%3D14%26wildtypeFilter%3Dwild%20type
RBPMS2	0.889031	12.6373	6.57693e-37	1.54747e-35	1.74849	TRUE	0.805334	10.6854	5.95956e-27	2.46718e-25	0.0447224	0.593018	0.276584	0.50035	13	125	239	56	6	28	6	6	6	13	13	1		Strong Hindbrain and Weaker Midbrain/R1	No images	NA	NA	No images	NA	Rbpms2	RNA binding protein with multiple splicing 2	protein coding gene	http://www.informatics.jax.org/gxd/marker/MGI:1919223?tab=imagestab#gxd=markerMgiId%3DMGI%3A102764%26theilerStage%3D%26assayType%3D%26results%3D25%26startIndex%3D0%26sort%3D%26dir%3Dasc%26tab%3Dimagestab%26theilerStageFilter%3D12%26theilerStageFilter%3D13%26theilerStageFilter%3D14%26wildtypeFilter%3Dwild%20type
CKB	0.864557	64.0894	0	0	2.51047	TRUE	0.152137	10.3424	2.26635e-25	9.07605e-24	0.698786	47.696	0	0	1	732	43	29	59	24	24	1	10	10	1	1	0	Strong Hindbrain and Weaker Midbrain/R1	Could not determine	NA	High midline	Could not determine	NA	Ckb	creatine kinase, brain	protein coding gene	http://www.informatics.jax.org/gxd/marker/MGI:88407?tab=imagestab#gxd=markerMgiId%3DMGI%3A102764%26theilerStage%3D%26assayType%3D%26results%3D25%26startIndex%3D0%26sort%3D%26dir%3Dasc%26tab%3Dimagestab%26theilerStageFilter%3D12%26theilerStageFilter%3D13%26theilerStageFilter%3D14%26wildtypeFilter%3Dwild%20type
MSX2	0.763507	36.1651	1.0761e-286	7.54154e-285	2.05605	TRUE	0.21185	10.2535	5.70414e-25	2.27505e-23	0.316824	15.3168	2.95434e-53	3.1507e-51	8	417	118	98	51	0	3	8	8	8	8	1	1	Strong Hindbrain and Weaker Midbrain/R1	MB/R1, HB	Yes	High lateral	Lateral	Yes	Msx2	msh homeobox 2	protein coding gene	http://www.informatics.jax.org/gxd/marker/MGI:97169?tab=imagestab#gxd=markerMgiId%3DMGI%3A102764%26theilerStage%3D%26assayType%3D%26results%3D25%26startIndex%3D0%26sort%3D%26dir%3Dasc%26tab%3Dimagestab%26theilerStageFilter%3D12%26theilerStageFilter%3D13%26theilerStageFilter%3D14%26wildtypeFilter%3Dwild%20type
SLC9A3R1	0.829077	14.7523	1.48598e-49	4.14786e-48	2.35552	TRUE	0.615488	10.2444	6.27255e-25	2.49668e-23	0.113448	1.89075	0.0293292	0.385225	1	220	92	78	13	18	18	3	3	16	1	1		Strong Hindbrain and Weaker Midbrain/R1	No images	NA	NA	No images	NA	Slc9a3r1	solute carrier family 9 (sodium/hydrogen exchanger), meMB/R1er 3 regulator 1	protein coding gene	http://www.informatics.jax.org/gxd/marker/MGI:1349482?tab=imagestab#gxd=markerMgiId%3DMGI%3A102764%26theilerStage%3D%26assayType%3D%26results%3D25%26startIndex%3D0%26sort%3D%26dir%3Dasc%26tab%3Dimagestab%26theilerStageFilter%3D12%26theilerStageFilter%3D13%26theilerStageFilter%3D14%26wildtypeFilter%3Dwild%20type
PAX7	0.778788	38.2875	0	0	2.00462	TRUE	0.208453	10.1604	1.48893e-24	5.8906e-23	0.418886	20.4015	8.10153e-93	1.28207e-90	8	721	248	98	51	0	3	8	8	8	8	1	1	Strong Hindbrain and Weaker Midbrain/R1	Could not determine	NA	High lateral	Could not determine	NA	Pax7	paired box 7	protein coding gene	http://www.informatics.jax.org/gxd/marker/MGI:97491?tab=imagestab#gxd=markerMgiId%3DMGI%3A102764%26theilerStage%3D%26assayType%3D%26results%3D25%26startIndex%3D0%26sort%3D%26dir%3Dasc%26tab%3Dimagestab%26theilerStageFilter%3D12%26theilerStageFilter%3D13%26theilerStageFilter%3D14%26wildtypeFilter%3Dwild%20type
MKRN1	0.821648	12.4442	7.52192e-36	1.7365e-34	2.79139	TRUE	0.714642	10.0561	4.31723e-24	1.68424e-22	0.0875164	1.23332	0.108728	0.50035	13	148	36	109	6	28	6	6	6	13	13	1		Strong Hindbrain and Weaker Midbrain/R1	No images	NA	NA	No images	NA	Mkrn1	makorin, ring finger protein, 1	protein coding gene	http://www.informatics.jax.org/gxd/marker/MGI:1859353?tab=imagestab#gxd=markerMgiId%3DMGI%3A102764%26theilerStage%3D%26assayType%3D%26results%3D25%26startIndex%3D0%26sort%3D%26dir%3Dasc%26tab%3Dimagestab%26theilerStageFilter%3D12%26theilerStageFilter%3D13%26theilerStageFilter%3D14%26wildtypeFilter%3Dwild%20type
FZD5	0.926727	207.695	0	0	2.47038	TRUE	0.707778	147.499	0	0	0.0805325	16.8033	1.15339e-63	1.38852e-61	6	607	251	7	34	34	16	16	16	6	6	2	3	Anterior Forebrain	Anterior FB	Yes	NA	High midline	NA	Fzd5	frizzled class receptor 5	protein coding gene	http://www.informatics.jax.org/gxd/marker/MGI:108571?tab=imagestab#gxd=markerMgiId%3DMGI%3A102764%26theilerStage%3D%26assayType%3D%26results%3D25%26startIndex%3D0%26sort%3D%26dir%3Dasc%26tab%3Dimagestab%26theilerStageFilter%3D12%26theilerStageFilter%3D13%26theilerStageFilter%3D14%26wildtypeFilter%3Dwild%20type
PAX6	0.93728	184.498	0	0	3.27744	TRUE	0.746718	136.111	0	0	0.0810913	14.7905	8.43924e-50	8.62517e-48	3	583	291	72	2	27	1	7	7	3	3	2	3	Anterior Forebrain	Anterior FB	Yes	NA	Midline excluded	NA	Pax6	paired box 6	protein coding gene	http://www.informatics.jax.org/gxd/marker/MGI:97490?tab=imagestab#gxd=markerMgiId%3DMGI%3A102764%26theilerStage%3D%26assayType%3D%26results%3D25%26startIndex%3D0%26sort%3D%26dir%3Dasc%26tab%3Dimagestab%26theilerStageFilter%3D12%26theilerStageFilter%3D13%26theilerStageFilter%3D14%26wildtypeFilter%3Dwild%20type
SIX6	0.890821	167.781	0	0	2.96536	TRUE	0.4998	88.7996	0	0	0.0910867	16.226	1.65132e-59	1.91739e-57	6	839	201	100	1	20	20	20	20	6	6	2	3	Anterior Forebrain	Anterior FB	Yes	NA	High midline	NA	Six6	sine oculis-related homeobox 6	protein coding gene	http://www.informatics.jax.org/gxd/marker/MGI:1341840?tab=imagestab#gxd=markerMgiId%3DMGI%3A102764%26theilerStage%3D%26assayType%3D%26results%3D25%26startIndex%3D0%26sort%3D%26dir%3Dasc%26tab%3Dimagestab%26theilerStageFilter%3D12%26theilerStageFilter%3D13%26theilerStageFilter%3D14%26wildtypeFilter%3Dwild%20type
MAF	0.906823	159.646	0	0	3.02945	TRUE	0.524298	86.6912	0	0	0.0849885	14.0959	2.01349e-45	1.88146e-43	6	458	201	100	1	20	20	20	20	6	6	2	3	Anterior Forebrain	No images	NA	NA	No images	NA	Maf	avian musculoaponeurotic fibrosarcoma oncogene homolog	protein coding gene	http://www.informatics.jax.org/gxd/marker/MGI:96909?tab=imagestab#gxd=markerMgiId%3DMGI%3A102764%26theilerStage%3D%26assayType%3D%26results%3D25%26startIndex%3D0%26sort%3D%26dir%3Dasc%26tab%3Dimagestab%26theilerStageFilter%3D12%26theilerStageFilter%3D13%26theilerStageFilter%3D14%26wildtypeFilter%3Dwild%20type
FOXG1	0.909119	119.445	0	0	2.46222	TRUE	0.66482	81.9857	0	0	0.0478553	5.8941	1.88363e-09	6.98724e-08	6	666	77	76	1	20	20	20	20	6	6	2		Anterior Forebrain	Anterior FB	Yes	NA	Global	NA	Foxg1	forkhead box G1	protein coding gene	http://www.informatics.jax.org/gxd/marker/MGI:1347464?tab=imagestab#gxd=markerMgiId%3DMGI%3A102764%26theilerStage%3D%26assayType%3D%26results%3D25%26startIndex%3D0%26sort%3D%26dir%3Dasc%26tab%3Dimagestab%26theilerStageFilter%3D12%26theilerStageFilter%3D13%26theilerStageFilter%3D14%26wildtypeFilter%3Dwild%20type
PTPRZ1	0.911771	70.6431	0	0	2.27883	TRUE	0.793983	57.1999	0	0	0.0935591	6.74513	7.64463e-12	3.19852e-10	6	248	210	76	1	20	20	20	20	6	6	2		Anterior Forebrain	No images	NA	NA	No images	NA	Ptprz1	protein tyrosine phosphatase, receptor type Z, polypeptide 1	protein coding gene	http://www.informatics.jax.org/gxd/marker/MGI:97816?tab=imagestab#gxd=markerMgiId%3DMGI%3A102764%26theilerStage%3D%26assayType%3D%26results%3D25%26startIndex%3D0%26sort%3D%26dir%3Dasc%26tab%3Dimagestab%26theilerStageFilter%3D12%26theilerStageFilter%3D13%26theilerStageFilter%3D14%26wildtypeFilter%3Dwild%20type
SHTN1	0.912622	63.924	0	0	1.50409	TRUE	0.696522	45.513	0	0	0.050652	3.31287	0.00046172	0.0100353	6	838	77	76	1	20	20	20	20	6	6	2		Anterior Forebrain	No images	NA	NA	No images	NA	Shtn1	shootin 1	protein coding gene	http://www.informatics.jax.org/gxd/marker/MGI:1918903?tab=imagestab#gxd=markerMgiId%3DMGI%3A102764%26theilerStage%3D%26assayType%3D%26results%3D25%26startIndex%3D0%26sort%3D%26dir%3Dasc%26tab%3Dimagestab%26theilerStageFilter%3D12%26theilerStageFilter%3D13%26theilerStageFilter%3D14%26wildtypeFilter%3Dwild%20type
NRG1	0.908314	64.9067	0	0	2.08354	TRUE	0.68645	45.2502	0	0	0.141013	9.2952	7.34615e-21	4.40836e-19	4	655	163	40	15	32	32	12	12	1	4	2		Anterior Forebrain	Anterior FB, HB	No	NA	Could not determine	NA	Nrg1	neuregulin 1	protein coding gene	http://www.informatics.jax.org/gxd/marker/MGI:96083?tab=imagestab#gxd=markerMgiId%3DMGI%3A102764%26theilerStage%3D%26assayType%3D%26results%3D25%26startIndex%3D0%26sort%3D%26dir%3Dasc%26tab%3Dimagestab%26theilerStageFilter%3D12%26theilerStageFilter%3D13%26theilerStageFilter%3D14%26wildtypeFilter%3Dwild%20type
TCF7L2	0.900635	65.6885	0	0	3.42552	TRUE	0.643323	43.7733	0	0	0.12979	8.83904	4.82714e-19	2.67579e-17	6	514	108	75	1	20	20	20	20	6	6	2		Anterior Forebrain	Strong FB, weak HB	Yes	NA	Could not determine	NA	Tcf7l2	transcription factor 7 like 2, T cell specific, HMG box	protein coding gene	http://www.informatics.jax.org/gxd/marker/MGI:1202879?tab=imagestab#gxd=markerMgiId%3DMGI%3A102764%26theilerStage%3D%26assayType%3D%26results%3D25%26startIndex%3D0%26sort%3D%26dir%3Dasc%26tab%3Dimagestab%26theilerStageFilter%3D12%26theilerStageFilter%3D13%26theilerStageFilter%3D14%26wildtypeFilter%3Dwild%20type
FZD8	0.92193	57.8125	0	0	1.92781	TRUE	0.713977	41.8694	0	0	0.079739	4.67986	1.43538e-06	4.31339e-05	6	829	77	76	1	20	20	20	20	6	6	2		Anterior Forebrain	Strong FB, weak MB/R1, weak HB	Yes	NA	Could not determine	NA	Fzd8	frizzled class receptor 8	protein coding gene	http://www.informatics.jax.org/gxd/marker/MGI:108460?tab=imagestab#gxd=markerMgiId%3DMGI%3A102764%26theilerStage%3D%26assayType%3D%26results%3D25%26startIndex%3D0%26sort%3D%26dir%3Dasc%26tab%3Dimagestab%26theilerStageFilter%3D12%26theilerStageFilter%3D13%26theilerStageFilter%3D14%26wildtypeFilter%3Dwild%20type
GREM1	0.855857	70.2146	0	0	2.06749	TRUE	0.50953	38.6392	0	0	0.0627479	4.7685	9.28024e-07	2.81462e-05	14	811	224	39	8	6	28	0	14	14	14	2		Anterior Forebrain	FB	Yes	NA	Could not determine	NA	Grem1	gremlin 1, DAN family BMP antagonist	protein coding gene	http://www.informatics.jax.org/gxd/marker/MGI:1344337?tab=imagestab#gxd=markerMgiId%3DMGI%3A102764%26theilerStage%3D%26assayType%3D%26results%3D25%26startIndex%3D0%26sort%3D%26dir%3Dasc%26tab%3Dimagestab%26theilerStageFilter%3D12%26theilerStageFilter%3D13%26theilerStageFilter%3D14%26wildtypeFilter%3Dwild%20type
HES1	0.928363	58.5813	0	0	3.03559	TRUE	0.608992	35.7624	2.12452e-280	3.23174e-278	0.246079	14.4605	1.07618e-47	1.07744e-45	6	599	108	75	1	20	20	20	20	6	6	2	4	Anterior Forebrain	Strong FB, weak MB/R1	Yes	High midline	Could not determine	NA	Hes1	hes family bHLH transcription factor 1	protein coding gene	http://www.informatics.jax.org/gxd/marker/MGI:104853?tab=imagestab#gxd=markerMgiId%3DMGI%3A102764%26theilerStage%3D%26assayType%3D%26results%3D25%26startIndex%3D0%26sort%3D%26dir%3Dasc%26tab%3Dimagestab%26theilerStageFilter%3D12%26theilerStageFilter%3D13%26theilerStageFilter%3D14%26wildtypeFilter%3Dwild%20type
SCUBE1	0.886257	49.4114	0	0	2.1894	TRUE	0.667161	34.6753	9.28845e-264	1.32078e-261	0.0397604	2.06576	0.0194256	0.277632	6	614	77	76	1	20	20	20	20	6	6	2		Anterior Forebrain	No images	NA	NA	No images	NA	Scube1	signal peptide, CUB domain, EGF-like 1	protein coding gene	http://www.informatics.jax.org/gxd/marker/MGI:1890616?tab=imagestab#gxd=markerMgiId%3DMGI%3A102764%26theilerStage%3D%26assayType%3D%26results%3D25%26startIndex%3D0%26sort%3D%26dir%3Dasc%26tab%3Dimagestab%26theilerStageFilter%3D12%26theilerStageFilter%3D13%26theilerStageFilter%3D14%26wildtypeFilter%3Dwild%20type
SALL3	0.886293	45.4834	0	0	2.4021	TRUE	0.67691	32.6346	6.63676e-234	8.92007e-232	0.183453	8.85816	4.06719e-19	2.26735e-17	3	649	215	92	17	35	1	7	7	3	3	2		Anterior Forebrain	Anterior FB	Yes	NA	Could not determine	NA	Sall3	spalt like transcription factor 3	protein coding gene	http://www.informatics.jax.org/gxd/marker/MGI:109295?tab=imagestab#gxd=markerMgiId%3DMGI%3A102764%26theilerStage%3D%26assayType%3D%26results%3D25%26startIndex%3D0%26sort%3D%26dir%3Dasc%26tab%3Dimagestab%26theilerStageFilter%3D12%26theilerStageFilter%3D13%26theilerStageFilter%3D14%26wildtypeFilter%3Dwild%20type
IQGAP1	0.78841	31.6124	1.24596e-219	7.66441e-218	2.28659	TRUE	0.742609	27.8938	1.58607e-171	1.78871e-169	0.0274262	1.0323	0.150965	0.50035	3	636	85	65	17	35	1	7	7	3	3	2		Anterior Forebrain	No images	NA	NA	No images	NA	Iqgap1	IQ motif containing GTPase activating protein 1	protein coding gene	http://www.informatics.jax.org/gxd/marker/MGI:1352757?tab=imagestab#gxd=markerMgiId%3DMGI%3A102764%26theilerStage%3D%26assayType%3D%26results%3D25%26startIndex%3D0%26sort%3D%26dir%3Dasc%26tab%3Dimagestab%26theilerStageFilter%3D12%26theilerStageFilter%3D13%26theilerStageFilter%3D14%26wildtypeFilter%3Dwild%20type
VAX1	0.900638	49.1124	0	0	1.10677	TRUE	0.515622	26.6487	9.25857e-157	1.00376e-154	0.0565592	2.92865	0.00170219	0.0342586	14	765	99	118	52	6	28	0	14	14	14	2		Anterior Forebrain	Anterior FB	Yes	NA	Could not determine	NA	Vax1	ventral anterior homeobox 1	protein coding gene	http://www.informatics.jax.org/gxd/marker/MGI:1277163?tab=imagestab#gxd=markerMgiId%3DMGI%3A102764%26theilerStage%3D%26assayType%3D%26results%3D25%26startIndex%3D0%26sort%3D%26dir%3Dasc%26tab%3Dimagestab%26theilerStageFilter%3D12%26theilerStageFilter%3D13%26theilerStageFilter%3D14%26wildtypeFilter%3Dwild%20type
TGFB2	0.921009	384.73	0	0	3.41423	TRUE	0.0679422	25.8299	2.04452e-147	2.08956e-145	0.887789	339.132	0	0	9	1	113	113	27	25	25	25	9	9	9	2	6	Anterior Forebrain	FB	Yes	High midline	High midline	Yes	Tgfb2	transforming growth factor, beta 2	protein coding gene	http://www.informatics.jax.org/gxd/marker/MGI:98726?tab=imagestab#gxd=markerMgiId%3DMGI%3A102764%26theilerStage%3D%26assayType%3D%26results%3D25%26startIndex%3D0%26sort%3D%26dir%3Dasc%26tab%3Dimagestab%26theilerStageFilter%3D12%26theilerStageFilter%3D13%26theilerStageFilter%3D14%26wildtypeFilter%3Dwild%20type
DACH1	0.880521	32.5787	4.10791e-233	2.55903e-231	1.61511	TRUE	0.722945	25.1675	4.54122e-140	4.54655e-138	0.0575271	2.00078	0.0227082	0.315511	14	716	42	39	8	6	28	0	14	14	14	2		Anterior Forebrain	FB	Yes	NA	Could not determine	NA	Dach1	dachshund family transcription factor 1	protein coding gene	http://www.informatics.jax.org/gxd/marker/MGI:1277991?tab=imagestab#gxd=markerMgiId%3DMGI%3A102764%26theilerStage%3D%26assayType%3D%26results%3D25%26startIndex%3D0%26sort%3D%26dir%3Dasc%26tab%3Dimagestab%26theilerStageFilter%3D12%26theilerStageFilter%3D13%26theilerStageFilter%3D14%26wildtypeFilter%3Dwild%20type
SOX5	0.863977	39.957	0	0	1.83993	TRUE	0.577275	24.8202	2.71167e-136	2.66055e-134	0.239976	10.3423	2.26846e-25	1.52969e-23	4	761	283	55	55	8	0	4	19	1	4	2	4	Anterior Forebrain	No images	NA	High midline	No images	NA	Sox5	SRY (sex determining region Y)-box 5	protein coding gene	http://www.informatics.jax.org/gxd/marker/MGI:98367?tab=imagestab#gxd=markerMgiId%3DMGI%3A102764%26theilerStage%3D%26assayType%3D%26results%3D25%26startIndex%3D0%26sort%3D%26dir%3Dasc%26tab%3Dimagestab%26theilerStageFilter%3D12%26theilerStageFilter%3D13%26theilerStageFilter%3D14%26wildtypeFilter%3Dwild%20type
SMOC1	0.868233	34.9302	1.29381e-267	8.72455e-266	1.74657	TRUE	0.606887	22.8159	1.59456e-115	1.46215e-113	0.052274	1.96519	0.0246961	0.336769	14	266	266	43	52	6	28	0	14	14	14	2		Anterior Forebrain	No images	NA	NA	No images	NA	Smoc1	SPARC related modular calcium binding 1	protein coding gene	http://www.informatics.jax.org/gxd/marker/MGI:1929878?tab=imagestab#gxd=markerMgiId%3DMGI%3A102764%26theilerStage%3D%26assayType%3D%26results%3D25%26startIndex%3D0%26sort%3D%26dir%3Dasc%26tab%3Dimagestab%26theilerStageFilter%3D12%26theilerStageFilter%3D13%26theilerStageFilter%3D14%26wildtypeFilter%3Dwild%20type
EFNB2	0.75887	34.9285	1.37508e-267	9.24081e-266	2.66174	TRUE	0.515726	22.104	1.44529e-108	1.29502e-106	0.272685	11.6665	9.4501e-32	7.27213e-30	0	769	66	110	10	43	7	15	15	15	0	2	4	Anterior Forebrain	Could not determine	NA	High midline	Could not determine	NA	Efnb2	ephrin B2	protein coding gene	http://www.informatics.jax.org/gxd/marker/MGI:105097?tab=imagestab#gxd=markerMgiId%3DMGI%3A102764%26theilerStage%3D%26assayType%3D%26results%3D25%26startIndex%3D0%26sort%3D%26dir%3Dasc%26tab%3Dimagestab%26theilerStageFilter%3D12%26theilerStageFilter%3D13%26theilerStageFilter%3D14%26wildtypeFilter%3Dwild%20type
EYA2	0.892876	28.8725	1.32411e-183	7.40258e-182	1.24882	TRUE	0.700366	21.7867	1.55055e-105	1.37677e-103	0.050134	1.55964	0.0594228	0.50035	14	641	99	118	52	6	28	0	14	14	14	2		Anterior Forebrain	No images	NA	NA	No images	NA	Eya2	EYA transcriptional coactivator and phosphatase 2	protein coding gene	http://www.informatics.jax.org/gxd/marker/MGI:109341?tab=imagestab#gxd=markerMgiId%3DMGI%3A102764%26theilerStage%3D%26assayType%3D%26results%3D25%26startIndex%3D0%26sort%3D%26dir%3Dasc%26tab%3Dimagestab%26theilerStageFilter%3D12%26theilerStageFilter%3D13%26theilerStageFilter%3D14%26wildtypeFilter%3Dwild%20type
UCP2	0.9299	24.9981	3.20273e-138	1.55178e-136	1.83363	TRUE	0.844611	21.1899	5.91846e-100	5.16168e-98	0.035674	0.89543	0.185279	0.50035	14	723	51	104	25	12	12	0	14	14	14	2		Anterior Forebrain	No images	NA	NA	No images	NA	Ucp2	uncoupling protein 2 (mitochondrial, proton carrier)	protein coding gene	http://www.informatics.jax.org/gxd/marker/MGI:109354?tab=imagestab#gxd=markerMgiId%3DMGI%3A102764%26theilerStage%3D%26assayType%3D%26results%3D25%26startIndex%3D0%26sort%3D%26dir%3Dasc%26tab%3Dimagestab%26theilerStageFilter%3D12%26theilerStageFilter%3D13%26theilerStageFilter%3D14%26wildtypeFilter%3Dwild%20type
PLS3	0.913424	24.5683	1.37835e-133	6.47064e-132	2.65799	TRUE	0.825635	20.8188	1.46341e-96	1.24314e-94	0.0421522	1.06463	0.143521	0.50035	3	256	85	65	17	35	1	7	7	3	3	2		Anterior Forebrain	Could not determine	NA	NA	Could not determine	NA	Pls3	plastin 3 (T-isoform)	protein coding gene	http://www.informatics.jax.org/gxd/marker/MGI:104807?tab=imagestab#gxd=markerMgiId%3DMGI%3A102764%26theilerStage%3D%26assayType%3D%26results%3D25%26startIndex%3D0%26sort%3D%26dir%3Dasc%26tab%3Dimagestab%26theilerStageFilter%3D12%26theilerStageFilter%3D13%26theilerStageFilter%3D14%26wildtypeFilter%3Dwild%20type
GPC4	0.903469	29.5795	1.37206e-192	7.8725e-191	1.38831	TRUE	0.640077	20.0422	1.18065e-89	9.61327e-88	0.033856	1.06213	0.144089	0.50035	14	434	99	118	52	6	28	0	14	14	14	2		Anterior Forebrain	Anterior FB	Yes	NA	Global	NA	Gpc4	glypican 4	protein coding gene	http://www.informatics.jax.org/gxd/marker/MGI:104902?tab=imagestab#gxd=markerMgiId%3DMGI%3A102764%26theilerStage%3D%26assayType%3D%26results%3D25%26startIndex%3D0%26sort%3D%26dir%3Dasc%26tab%3Dimagestab%26theilerStageFilter%3D12%26theilerStageFilter%3D13%26theilerStageFilter%3D14%26wildtypeFilter%3Dwild%20type
GPC3	0.929053	56.4013	0	0	3.35464	TRUE	0.348585	19.5573	1.78762e-85	1.42596e-83	0.506511	28.5088	4.55781e-179	1.14664e-176	4	703	103	103	15	32	32	12	12	1	4	2	4	Anterior Forebrain	No images	NA	High midline	No images	NA	Gpc3	glypican 3	protein coding gene	http://www.informatics.jax.org/gxd/marker/MGI:104903?tab=imagestab#gxd=markerMgiId%3DMGI%3A102764%26theilerStage%3D%26assayType%3D%26results%3D25%26startIndex%3D0%26sort%3D%26dir%3Dasc%26tab%3Dimagestab%26theilerStageFilter%3D12%26theilerStageFilter%3D13%26theilerStageFilter%3D14%26wildtypeFilter%3Dwild%20type
NRCAM	0.864125	33.3525	3.35059e-244	2.12092e-242	1.91664	TRUE	0.537389	19.3008	2.64559e-83	2.06831e-81	0.224879	8.08583	3.08722e-16	1.51073e-14	4	524	115	40	15	32	32	12	12	1	4	2		Anterior Forebrain	No images	NA	NA	No images	NA	Nrcam	neuronal cell adhesion molecule	protein coding gene	http://www.informatics.jax.org/gxd/marker/MGI:104750?tab=imagestab#gxd=markerMgiId%3DMGI%3A102764%26theilerStage%3D%26assayType%3D%26results%3D25%26startIndex%3D0%26sort%3D%26dir%3Dasc%26tab%3Dimagestab%26theilerStageFilter%3D12%26theilerStageFilter%3D13%26theilerStageFilter%3D14%26wildtypeFilter%3Dwild%20type
LTBP1	0.895261	35.3944	1.04291e-274	7.10591e-273	1.78519	TRUE	0.519955	19.1745	3.02031e-82	2.33337e-80	0.28932	10.6977	5.21795e-27	3.61809e-25	4	430	80	55	55	8	0	4	19	1	4	2	4	Anterior Forebrain	No images	NA	High midline	No images	NA	Ltbp1	latent transforming growth factor beta binding protein 1	protein coding gene	http://www.informatics.jax.org/gxd/marker/MGI:109151?tab=imagestab#gxd=markerMgiId%3DMGI%3A102764%26theilerStage%3D%26assayType%3D%26results%3D25%26startIndex%3D0%26sort%3D%26dir%3Dasc%26tab%3Dimagestab%26theilerStageFilter%3D12%26theilerStageFilter%3D13%26theilerStageFilter%3D14%26wildtypeFilter%3Dwild%20type
FGFR2	0.819218	27.2471	9.00258e-164	4.74886e-162	2.20418	TRUE	0.597889	18.6621	5.03909e-78	3.75977e-76	0.146636	4.587	2.24833e-06	6.65445e-05	12	509	254	1	14	5	5	5	5	12	12	2		Anterior Forebrain	Strong Anterior FB, weak HB	Yes	NA	Global	NA	Fgfr2	fibroblast growth factor receptor 2	protein coding gene	http://www.informatics.jax.org/gxd/marker/MGI:95523?tab=imagestab#gxd=markerMgiId%3DMGI%3A102764%26theilerStage%3D%26assayType%3D%26results%3D25%26startIndex%3D0%26sort%3D%26dir%3Dasc%26tab%3Dimagestab%26theilerStageFilter%3D12%26theilerStageFilter%3D13%26theilerStageFilter%3D14%26wildtypeFilter%3Dwild%20type
CACNA2D1	0.908714	24.1544	3.35496e-129	1.55637e-127	1.0161	TRUE	0.726167	18.0806	2.26463e-73	1.62779e-71	0.0465842	1.16037	0.122948	0.50035	14	804	137	118	52	6	28	0	14	14	14	2		Anterior Forebrain	No images	NA	NA	No images	NA	Cacna2d1	calcium channel, voltage-dependent, alpha2/delta subunit 1	protein coding gene	http://www.informatics.jax.org/gxd/marker/MGI:88295?tab=imagestab#gxd=markerMgiId%3DMGI%3A102764%26theilerStage%3D%26assayType%3D%26results%3D25%26startIndex%3D0%26sort%3D%26dir%3Dasc%26tab%3Dimagestab%26theilerStageFilter%3D12%26theilerStageFilter%3D13%26theilerStageFilter%3D14%26wildtypeFilter%3Dwild%20type
TMEM108	0.889842	26.2463	3.93952e-152	2.01316e-150	2.45263	TRUE	0.651105	17.8256	2.23451e-71	1.59447e-69	0.0181488	0.496394	0.309808	0.50035	14	431	189	116	25	12	12	0	14	14	14	2		Anterior Forebrain	No images	NA	NA	No images	NA	Tmem108	transmeMB/R1rane protein 108	protein coding gene	http://www.informatics.jax.org/gxd/marker/MGI:1932411?tab=imagestab#gxd=markerMgiId%3DMGI%3A102764%26theilerStage%3D%26assayType%3D%26results%3D25%26startIndex%3D0%26sort%3D%26dir%3Dasc%26tab%3Dimagestab%26theilerStageFilter%3D12%26theilerStageFilter%3D13%26theilerStageFilter%3D14%26wildtypeFilter%3Dwild%20type
PLAGL1	0.869055	41.2111	0	0	1.83703	TRUE	0.39427	17.5598	2.50047e-69	1.77136e-67	0.355497	15.8923	3.58171e-57	3.94854e-55	4	561	115	40	15	32	32	12	12	1	4	2	3	Anterior Forebrain	No images	NA	NA	No images	NA	Plagl1	pleiomorphic adenoma gene-like 1	protein coding gene	http://www.informatics.jax.org/gxd/marker/MGI:1100874?tab=imagestab#gxd=markerMgiId%3DMGI%3A102764%26theilerStage%3D%26assayType%3D%26results%3D25%26startIndex%3D0%26sort%3D%26dir%3Dasc%26tab%3Dimagestab%26theilerStageFilter%3D12%26theilerStageFilter%3D13%26theilerStageFilter%3D14%26wildtypeFilter%3Dwild%20type
AKAP12	0.681142	20.2744	1.08103e-91	4.12707e-90	2.15693	TRUE	0.582998	16.2612	9.29965e-60	6.02268e-58	0.0440116	1.22909	0.109519	0.50035	14	371	61	116	25	12	12	0	14	14	14	2		Anterior Forebrain	No images	NA	NA	No images	NA	Akap12	A kinase (PRKA) anchor protein (gravin) 12	protein coding gene	http://www.informatics.jax.org/gxd/marker/MGI:1932576?tab=imagestab#gxd=markerMgiId%3DMGI%3A102764%26theilerStage%3D%26assayType%3D%26results%3D25%26startIndex%3D0%26sort%3D%26dir%3Dasc%26tab%3Dimagestab%26theilerStageFilter%3D12%26theilerStageFilter%3D13%26theilerStageFilter%3D14%26wildtypeFilter%3Dwild%20type
FZD2	0.933874	30.2413	3.39041e-201	2.00392e-199	3.01815	TRUE	0.537455	16.0994	1.28749e-58	8.28343e-57	0.368896	11.06	9.80307e-29	7.09836e-27	4	625	103	103	15	32	32	12	12	1	4	2	4	Anterior Forebrain	Could not determine	NA	High midline	Could not determine	NA	Fzd2	frizzled class receptor 2	protein coding gene	http://www.informatics.jax.org/gxd/marker/MGI:1888513?tab=imagestab#gxd=markerMgiId%3DMGI%3A102764%26theilerStage%3D%26assayType%3D%26results%3D25%26startIndex%3D0%26sort%3D%26dir%3Dasc%26tab%3Dimagestab%26theilerStageFilter%3D12%26theilerStageFilter%3D13%26theilerStageFilter%3D14%26wildtypeFilter%3Dwild%20type
MYO10	0.873281	25.5704	1.62961e-144	8.05486e-143	2.72397	TRUE	0.57459	15.7194	5.57124e-56	3.50399e-54	0.1499	4.10931	1.98424e-05	0.000526883	4	504	80	55	55	8	0	4	19	1	4	2		Anterior Forebrain	Strong Anterior FB, weak MB/R1, weak HB	Yes	NA	Could not determine	NA	Myo10	myosin X	protein coding gene	http://www.informatics.jax.org/gxd/marker/MGI:107716?tab=imagestab#gxd=markerMgiId%3DMGI%3A102764%26theilerStage%3D%26assayType%3D%26results%3D25%26startIndex%3D0%26sort%3D%26dir%3Dasc%26tab%3Dimagestab%26theilerStageFilter%3D12%26theilerStageFilter%3D13%26theilerStageFilter%3D14%26wildtypeFilter%3Dwild%20type
NECAB2	0.826588	28.5064	4.88272e-179	2.71427e-177	1.99673	TRUE	0.482521	15.2885	4.56443e-53	2.799e-51	0.170624	5.40378	3.26253e-08	1.10762e-06	14	793	110	48	23	12	12	0	14	14	14	2		Anterior Forebrain	FB	Yes	NA	Could not determine	NA	Necab2	N-terminal EF-hand calcium binding protein 2	protein coding gene	http://www.informatics.jax.org/gxd/marker/MGI:2152211?tab=imagestab#gxd=markerMgiId%3DMGI%3A102764%26theilerStage%3D%26assayType%3D%26results%3D25%26startIndex%3D0%26sort%3D%26dir%3Dasc%26tab%3Dimagestab%26theilerStageFilter%3D12%26theilerStageFilter%3D13%26theilerStageFilter%3D14%26wildtypeFilter%3Dwild%20type
CDKN1C	0.832072	64.146	0	0	3.7488	TRUE	0.208061	14.9705	5.72494e-51	3.43549e-49	0.523987	37.786	0	0	4	595	297	50	35	8	0	4	19	1	4	2	5	Anterior Forebrain	Could not determine	NA	High midline	Could not determine	NA	Cdkn1c	cyclin-dependent kinase inhibitor 1C (P57)	protein coding gene	http://www.informatics.jax.org/gxd/marker/MGI:104564?tab=imagestab#gxd=markerMgiId%3DMGI%3A102764%26theilerStage%3D%26assayType%3D%26results%3D25%26startIndex%3D0%26sort%3D%26dir%3Dasc%26tab%3Dimagestab%26theilerStageFilter%3D12%26theilerStageFilter%3D13%26theilerStageFilter%3D14%26wildtypeFilter%3Dwild%20type
CBLN2	0.867739	26.0736	3.62958e-150	1.84039e-148	1.01569	TRUE	0.524304	14.4536	1.18974e-47	6.96904e-46	0.0598652	1.65488	0.0489745	0.50035	14	406	137	118	52	6	28	0	14	14	14	2		Anterior Forebrain	No images	NA	NA	No images	NA	Cbln2	cerebellin 2 precursor protein	protein coding gene	http://www.informatics.jax.org/gxd/marker/MGI:88282?tab=imagestab#gxd=markerMgiId%3DMGI%3A102764%26theilerStage%3D%26assayType%3D%26results%3D25%26startIndex%3D0%26sort%3D%26dir%3Dasc%26tab%3Dimagestab%26theilerStageFilter%3D12%26theilerStageFilter%3D13%26theilerStageFilter%3D14%26wildtypeFilter%3Dwild%20type
DUSP5	0.844868	23.7047	1.61256e-124	7.37605e-123	2.04148	TRUE	0.524886	13.8562	5.8381e-44	3.29198e-42	0.146547	3.86963	5.45003e-05	0.0013764	14	656	4	41	8	6	28	0	14	14	14	2		Anterior Forebrain	No images	NA	NA	No images	NA	Dusp5	dual specificity phosphatase 5	protein coding gene	http://www.informatics.jax.org/gxd/marker/MGI:2685183?tab=imagestab#gxd=markerMgiId%3DMGI%3A102764%26theilerStage%3D%26assayType%3D%26results%3D25%26startIndex%3D0%26sort%3D%26dir%3Dasc%26tab%3Dimagestab%26theilerStageFilter%3D12%26theilerStageFilter%3D13%26theilerStageFilter%3D14%26wildtypeFilter%3Dwild%20type
9430076C15RIK	0.800132	19.8814	2.94972e-88	1.09834e-86	1.31215	TRUE	0.598998	13.7174	3.99404e-43	2.22656e-41	0.0790625	1.80807	0.0352976	0.4465	14	618	284	35	25	12	12	0	14	14	14	2		Anterior Forebrain	No images	NA	NA	No images	NA	Creb5	cAMP responsive element binding protein 5	protein coding gene	http://www.informatics.jax.org/gxd/marker/MGI:2443973?tab=imagestab#gxd=markerMgiId%3DMGI%3A2443973%26theilerStage%3D%26assayType%3D%26results%3D25%26startIndex%3D0%26sort%3D%26dir%3Dasc%26tab%3Dimagestab%26theilerStageFilter%3D12%26theilerStageFilter%3D13%26theilerStageFilter%3D14%26wildtypeFilter%3Dwild%20type
GM45009	0.837504	18.2462	1.10984e-74	3.78098e-73	1.53586	TRUE	0.631988	13.0297	4.14748e-39	2.18193e-37	0.154373	3.18279	0.000729328	0.0153723	4	346	292	108	26	7	0	4	19	1	4	2		Anterior Forebrain	No images	NA	NA	No images	NA	Gm32601	predicted gene, 32061	lncRNA gene	http://www.informatics.jax.org/gxd/marker/MGI:5591220?tab=imagestab#gxd=markerMgiId%3DMGI%3A5591220%26theilerStage%3D%26assayType%3D%26results%3D25%26startIndex%3D0%26sort%3D%26dir%3Dasc%26tab%3Dimagestab%26theilerStageFilter%3D12%26theilerStageFilter%3D13%26theilerStageFilter%3D14%26wildtypeFilter%3Dwild%20type
TUBB6	0.838744	17.0144	3.20992e-65	1.03259e-63	1.66475	TRUE	0.692209	13.0233	4.51156e-39	2.36712e-37	0.0832899	1.56712	0.0585431	0.50035	14	784	173	35	25	12	12	0	14	14	14	2		Anterior Forebrain	No images	NA	NA	No images	NA	Tubb6	tubulin, beta 6 class V	protein coding gene	http://www.informatics.jax.org/gxd/marker/MGI:1915201?tab=imagestab#gxd=markerMgiId%3DMGI%3A102764%26theilerStage%3D%26assayType%3D%26results%3D25%26startIndex%3D0%26sort%3D%26dir%3Dasc%26tab%3Dimagestab%26theilerStageFilter%3D12%26theilerStageFilter%3D13%26theilerStageFilter%3D14%26wildtypeFilter%3Dwild%20type
TCFL5	0.876566	14.8871	1.9974e-50	5.66401e-49	2.17818	TRUE	0.813294	12.8544	4.06494e-38	2.09911e-36	0.0383892	0.607871	0.271637	0.50035	14	455	61	116	25	12	12	0	14	14	14	2		Anterior Forebrain	No images	NA	NA	No images	NA	Tcfl5	transcription factor-like 5 (basic helix-loop-helix)	protein coding gene	http://www.informatics.jax.org/gxd/marker/MGI:2672878?tab=imagestab#gxd=markerMgiId%3DMGI%3A102764%26theilerStage%3D%26assayType%3D%26results%3D25%26startIndex%3D0%26sort%3D%26dir%3Dasc%26tab%3Dimagestab%26theilerStageFilter%3D12%26theilerStageFilter%3D13%26theilerStageFilter%3D14%26wildtypeFilter%3Dwild%20type
COL9A2	0.895696	23.182	3.45846e-119	1.55654e-117	1.02566	TRUE	0.532576	12.8131	6.92568e-38	3.54837e-36	0.103612	2.4991	0.00622537	0.106971	14	414	137	118	52	6	28	0	14	14	14	2		Anterior Forebrain	No images	NA	NA	No images	NA	Col9a2	collagen, type IX, alpha 2	protein coding gene	http://www.informatics.jax.org/gxd/marker/MGI:88466?tab=imagestab#gxd=markerMgiId%3DMGI%3A102764%26theilerStage%3D%26assayType%3D%26results%3D25%26startIndex%3D0%26sort%3D%26dir%3Dasc%26tab%3Dimagestab%26theilerStageFilter%3D12%26theilerStageFilter%3D13%26theilerStageFilter%3D14%26wildtypeFilter%3Dwild%20type
ARID3A	0.877209	22.3744	3.49284e-111	1.50969e-109	2.16798	TRUE	0.51864	12.3743	1.79941e-35	8.78355e-34	0.294539	7.04416	9.32941e-13	4.0413e-11	4	546	75	55	55	8	0	4	19	1	4	2		Anterior Forebrain	No images	NA	NA	No images	NA	Arid3a	AT rich interactive domain 3A (BRIGHT-like)	protein coding gene	http://www.informatics.jax.org/gxd/marker/MGI:1328360?tab=imagestab#gxd=markerMgiId%3DMGI%3A102764%26theilerStage%3D%26assayType%3D%26results%3D25%26startIndex%3D0%26sort%3D%26dir%3Dasc%26tab%3Dimagestab%26theilerStageFilter%3D12%26theilerStageFilter%3D13%26theilerStageFilter%3D14%26wildtypeFilter%3Dwild%20type
TCF7L1	0.871424	26.0311	1.10046e-149	5.55124e-148	2.29681	TRUE	0.438815	12.2397	9.53344e-35	4.54065e-33	0.39973	11.1767	2.65002e-29	1.96975e-27	4	714	283	55	55	8	0	4	19	1	4	2	4	Anterior Forebrain	Could not determine	NA	High midline	Could not determine	NA	Tcf7l1	transcription factor 7 like 1 (T cell specific, HMG box)	protein coding gene	http://www.informatics.jax.org/gxd/marker/MGI:1202876?tab=imagestab#gxd=markerMgiId%3DMGI%3A102764%26theilerStage%3D%26assayType%3D%26results%3D25%26startIndex%3D0%26sort%3D%26dir%3Dasc%26tab%3Dimagestab%26theilerStageFilter%3D12%26theilerStageFilter%3D13%26theilerStageFilter%3D14%26wildtypeFilter%3Dwild%20type
KRT8	0.858969	53.1922	0	0	2.22508	TRUE	0.210401	11.9742	2.42534e-33	1.13858e-31	0.582967	33.3548	3.09887e-244	1.06683e-241	4	421	116	50	35	8	0	4	19	1	4	2	0	Anterior Forebrain	Could not determine	NA	High midline	Could not determine	NA	Krt8	keratin 8	protein coding gene	http://www.informatics.jax.org/gxd/marker/MGI:96705?tab=imagestab#gxd=markerMgiId%3DMGI%3A102764%26theilerStage%3D%26assayType%3D%26results%3D25%26startIndex%3D0%26sort%3D%26dir%3Dasc%26tab%3Dimagestab%26theilerStageFilter%3D12%26theilerStageFilter%3D13%26theilerStageFilter%3D14%26wildtypeFilter%3Dwild%20type
FAM53B	0.851317	15.3193	2.84282e-53	8.35099e-52	1.76211	TRUE	0.712511	11.9305	4.10316e-33	1.91706e-31	0.0540356	0.904304	0.182917	0.50035	14	323	169	43	52	6	28	0	14	14	14	2		Anterior Forebrain	No images	NA	NA	No images	NA	Fam53b	family with sequence similarity 53, meMB/R1er B	protein coding gene	http://www.informatics.jax.org/gxd/marker/MGI:1925188?tab=imagestab#gxd=markerMgiId%3DMGI%3A102764%26theilerStage%3D%26assayType%3D%26results%3D25%26startIndex%3D0%26sort%3D%26dir%3Dasc%26tab%3Dimagestab%26theilerStageFilter%3D12%26theilerStageFilter%3D13%26theilerStageFilter%3D14%26wildtypeFilter%3Dwild%20type
LMAN1	0.929524	15.4487	3.84912e-54	1.13924e-52	2.83917	TRUE	0.744706	11.5459	3.87131e-31	1.77908e-29	0.12495	1.93813	0.0263035	0.354015	6	289	31	75	1	20	20	20	20	6	6	2		Anterior Forebrain	No images	NA	NA	No images	NA	Lman1	lectin, mannose-binding, 1	protein coding gene	http://www.informatics.jax.org/gxd/marker/MGI:1917611?tab=imagestab#gxd=markerMgiId%3DMGI%3A102764%26theilerStage%3D%26assayType%3D%26results%3D25%26startIndex%3D0%26sort%3D%26dir%3Dasc%26tab%3Dimagestab%26theilerStageFilter%3D12%26theilerStageFilter%3D13%26theilerStageFilter%3D14%26wildtypeFilter%3Dwild%20type
MPPED1	0.886014	15.1215	5.83971e-52	1.69016e-50	1.36333	TRUE	0.695287	11.0628	9.50411e-29	4.13524e-27	0.0567836	0.904177	0.182951	0.50035	14	329	137	118	52	6	28	0	14	14	14	2		Anterior Forebrain	No images	NA	NA	No images	NA	Mpped1	metallophosphoesterase domain containing 1	protein coding gene	http://www.informatics.jax.org/gxd/marker/MGI:106316?tab=imagestab#gxd=markerMgiId%3DMGI%3A102764%26theilerStage%3D%26assayType%3D%26results%3D25%26startIndex%3D0%26sort%3D%26dir%3Dasc%26tab%3Dimagestab%26theilerStageFilter%3D12%26theilerStageFilter%3D13%26theilerStageFilter%3D14%26wildtypeFilter%3Dwild%20type
OGFRL1	0.870724	12.9034	2.15469e-38	5.20067e-37	1.70847	TRUE	0.793925	11.0485	1.11473e-28	4.83948e-27	0.0303952	0.424043	0.335767	0.50035	14	304	61	116	25	12	12	0	14	14	14	2		Anterior Forebrain	No images	NA	NA	No images	NA	Ogfrl1	opioid growth factor receptor-like 1	protein coding gene	http://www.informatics.jax.org/gxd/marker/MGI:1917405?tab=imagestab#gxd=markerMgiId%3DMGI%3A102764%26theilerStage%3D%26assayType%3D%26results%3D25%26startIndex%3D0%26sort%3D%26dir%3Dasc%26tab%3Dimagestab%26theilerStageFilter%3D12%26theilerStageFilter%3D13%26theilerStageFilter%3D14%26wildtypeFilter%3Dwild%20type
SPINK1	0.890622	80.408	0	0	1.92284	TRUE	0.122885	10.4121	1.09147e-25	4.42521e-24	0.655908	55.8749	0	0	9	794	123	61	61	14	14	14	9	9	9	2	4	Anterior Forebrain	Global	No	High midline	High midline	Yes	Spink1	serine peptidase inhibitor, Kazal type 1	protein coding gene	http://www.informatics.jax.org/gxd/marker/MGI:106202?tab=imagestab#gxd=markerMgiId%3DMGI%3A102764%26theilerStage%3D%26assayType%3D%26results%3D25%26startIndex%3D0%26sort%3D%26dir%3Dasc%26tab%3Dimagestab%26theilerStageFilter%3D12%26theilerStageFilter%3D13%26theilerStageFilter%3D14%26wildtypeFilter%3Dwild%20type
EN1	0.945886	349.868	0	0	3.89315	TRUE	0.829286	283.915	0	0	0.115182	39.4174	0	0	11	547	273	79	39	39	2	11	11	11	11	3	1	Midbrain/R1	MB/R1	Yes	High lateral	Midline excluded	Yes	En1	engrailed 1	protein coding gene	http://www.informatics.jax.org/gxd/marker/MGI:95389?tab=imagestab#gxd=markerMgiId%3DMGI%3A102764%26theilerStage%3D%26assayType%3D%26results%3D25%26startIndex%3D0%26sort%3D%26dir%3Dasc%26tab%3Dimagestab%26theilerStageFilter%3D12%26theilerStageFilter%3D13%26theilerStageFilter%3D14%26wildtypeFilter%3Dwild%20type
EN2	0.916996	171.745	0	0	2.72325	TRUE	0.688834	119.397	0	0	0.144741	25.1093	1.97031e-139	4.29594e-137	11	862	218	79	39	39	2	11	11	11	11	3	2	Midbrain/R1	MB/R1	Yes	Midline excluded	Midline excluded	Yes	En2	engrailed 2	protein coding gene	http://www.informatics.jax.org/gxd/marker/MGI:95390?tab=imagestab#gxd=markerMgiId%3DMGI%3A102764%26theilerStage%3D%26assayType%3D%26results%3D25%26startIndex%3D0%26sort%3D%26dir%3Dasc%26tab%3Dimagestab%26theilerStageFilter%3D12%26theilerStageFilter%3D13%26theilerStageFilter%3D14%26wildtypeFilter%3Dwild%20type
PAX5	0.899743	158.524	0	0	2.72433	TRUE	0.687713	111.912	0	0	0.0981736	15.9935	7.08713e-58	7.90175e-56	11	828	218	79	39	39	2	11	11	11	11	3	2	Midbrain/R1	MB/R1	Yes	Midline excluded	Could not determine	NA	Pax5	paired box 5	protein coding gene	http://www.informatics.jax.org/gxd/marker/MGI:97489?tab=imagestab#gxd=markerMgiId%3DMGI%3A102764%26theilerStage%3D%26assayType%3D%26results%3D25%26startIndex%3D0%26sort%3D%26dir%3Dasc%26tab%3Dimagestab%26theilerStageFilter%3D12%26theilerStageFilter%3D13%26theilerStageFilter%3D14%26wildtypeFilter%3Dwild%20type
WNT1	0.902956	141.42	0	0	2.85124	TRUE	0.694477	100.525	0	0	0.326623	47.2572	0	0	5	440	62	4	12	26	26	26	2	5	5	3	1	Midbrain/R1	MB/R1	Yes	High lateral	Midline excluded	Yes	Wnt1	wingless-type MMTV integration site family, meMB/R1er 1	protein coding gene	http://www.informatics.jax.org/gxd/marker/MGI:98953?tab=imagestab#gxd=markerMgiId%3DMGI%3A102764%26theilerStage%3D%26assayType%3D%26results%3D25%26startIndex%3D0%26sort%3D%26dir%3Dasc%26tab%3Dimagestab%26theilerStageFilter%3D12%26theilerStageFilter%3D13%26theilerStageFilter%3D14%26wildtypeFilter%3Dwild%20type
SP5	0.926636	134.834	0	0	2.72083	TRUE	0.734678	99.0879	0	0	0.353996	47.679	0	0	5	756	222	4	12	26	26	26	2	5	5	3	1	Midbrain/R1	MB/R1	Yes	High lateral	High lateral	Yes	Sp5	trans-acting transcription factor 5	protein coding gene	http://www.informatics.jax.org/gxd/marker/MGI:1927715?tab=imagestab#gxd=markerMgiId%3DMGI%3A102764%26theilerStage%3D%26assayType%3D%26results%3D25%26startIndex%3D0%26sort%3D%26dir%3Dasc%26tab%3Dimagestab%26theilerStageFilter%3D12%26theilerStageFilter%3D13%26theilerStageFilter%3D14%26wildtypeFilter%3Dwild%20type
IRX1	0.930322	120.408	0	0	2.71655	TRUE	0.709858	84.9714	0	0	0.268084	32.0732	5.20592e-226	1.62152e-223	5	527	222	4	12	26	26	26	2	5	5	3	1	Midbrain/R1	MB/R1	Yes	High lateral	Could not determine	NA	Irx1	Iroquois homeobox 1	protein coding gene	http://www.informatics.jax.org/gxd/marker/MGI:1197515?tab=imagestab#gxd=markerMgiId%3DMGI%3A102764%26theilerStage%3D%26assayType%3D%26results%3D25%26startIndex%3D0%26sort%3D%26dir%3Dasc%26tab%3Dimagestab%26theilerStageFilter%3D12%26theilerStageFilter%3D13%26theilerStageFilter%3D14%26wildtypeFilter%3Dwild%20type
PAX8	0.909259	117.022	0	0	2.36204	TRUE	0.662472	78.8197	0	0	0.120638	14.3766	3.62921e-47	3.49098e-45	11	646	218	79	39	39	2	11	11	11	11	3	2	Midbrain/R1	MB/R1, Otic vesicle	Yes	Midline excluded	Could not determine	NA	Pax8	paired box 8	protein coding gene	http://www.informatics.jax.org/gxd/marker/MGI:97492?tab=imagestab#gxd=markerMgiId%3DMGI%3A102764%26theilerStage%3D%26assayType%3D%26results%3D25%26startIndex%3D0%26sort%3D%26dir%3Dasc%26tab%3Dimagestab%26theilerStageFilter%3D12%26theilerStageFilter%3D13%26theilerStageFilter%3D14%26wildtypeFilter%3Dwild%20type
CLDN10	0.917313	94.925	0	0	2.30093	TRUE	0.752153	72.0603	0	0	0.0442372	4.24527	1.09164e-05	0.000297931	2	588	37	28	58	23	23	23	1	2	2	3		Midbrain/R1	No images	NA	NA	No images	NA	Cldn10	claudin 10	protein coding gene	http://www.informatics.jax.org/gxd/marker/MGI:1913101?tab=imagestab#gxd=markerMgiId%3DMGI%3A102764%26theilerStage%3D%26assayType%3D%26results%3D25%26startIndex%3D0%26sort%3D%26dir%3Dasc%26tab%3Dimagestab%26theilerStageFilter%3D12%26theilerStageFilter%3D13%26theilerStageFilter%3D14%26wildtypeFilter%3Dwild%20type
2700046A07RIK	0.911562	82.6632	0	0	2.00719	TRUE	0.793237	66.6781	0	0	0.235554	19.7654	2.95774e-87	4.4992e-85	5	798	203	4	12	26	26	26	2	5	5	3	1	Midbrain/R1	No images	NA	High lateral	No images	NA	2700046A07Rik	RIKEN cDNA 2700046A07 gene	lncRNA gene	http://www.informatics.jax.org/gxd/marker/MGI:1919803?tab=imagestab#gxd=markerMgiId%3DMGI%3A102764%26theilerStage%3D%26assayType%3D%26results%3D25%26startIndex%3D0%26sort%3D%26dir%3Dasc%26tab%3Dimagestab%26theilerStageFilter%3D12%26theilerStageFilter%3D13%26theilerStageFilter%3D14%26wildtypeFilter%3Dwild%20type
FLRT1	0.899021	95.4537	0	0	1.99837	TRUE	0.658193	64.4561	0	0	0.20358	19.9481	7.7783e-89	1.21138e-86	11	845	146	20	42	17	2	11	11	11	11	3	2	Midbrain/R1	MB/R1	Yes	Midline excluded	Could not determine	NA	Flrt1	fibronectin leucine rich transmeMB/R1rane protein 1	protein coding gene	http://www.informatics.jax.org/gxd/marker/MGI:3026647?tab=imagestab#gxd=markerMgiId%3DMGI%3A102764%26theilerStage%3D%26assayType%3D%26results%3D25%26startIndex%3D0%26sort%3D%26dir%3Dasc%26tab%3Dimagestab%26theilerStageFilter%3D12%26theilerStageFilter%3D13%26theilerStageFilter%3D14%26wildtypeFilter%3Dwild%20type
2610027F03RIK	0.915725	67.3607	0	0	1.68436	TRUE	0.774019	52.5643	0	0	0.118181	8.02657	5.01194e-16	2.42838e-14	11	746	64	8	36	36	2	11	11	11	11	3		Midbrain/R1	No images	NA	NA	No images	NA	2610027F03Rik	RIKEN cDNA 2610027F03 gene	lncRNA gene	http://www.informatics.jax.org/gxd/marker/MGI:1917154?tab=imagestab#gxd=markerMgiId%3DMGI%3A102764%26theilerStage%3D%26assayType%3D%26results%3D25%26startIndex%3D0%26sort%3D%26dir%3Dasc%26tab%3Dimagestab%26theilerStageFilter%3D12%26theilerStageFilter%3D13%26theilerStageFilter%3D14%26wildtypeFilter%3Dwild%20type
CRIP2	0.904167	62.4315	0	0	2.42381	TRUE	0.801798	51.252	0	0	0.236091	15.0747	1.18736e-51	1.25266e-49	5	724	203	4	12	26	26	26	2	5	5	3	0	Midbrain/R1	Could not determine	NA	High midline	Could not determine	NA	Crip2	cysteine rich protein 2	protein coding gene	http://www.informatics.jax.org/gxd/marker/MGI:1915587?tab=imagestab#gxd=markerMgiId%3DMGI%3A102764%26theilerStage%3D%26assayType%3D%26results%3D25%26startIndex%3D0%26sort%3D%26dir%3Dasc%26tab%3Dimagestab%26theilerStageFilter%3D12%26theilerStageFilter%3D13%26theilerStageFilter%3D14%26wildtypeFilter%3Dwild%20type
LMX1B	0.87942	64.9005	0	0	1.76304	TRUE	0.722629	49.2871	0	0	0.274757	18.7556	8.71308e-79	1.19564e-76	11	476	57	8	36	36	2	11	11	11	11	3	0	Midbrain/R1	Could not determine	NA	High midline	Could not determine	NA	Lmx1b	LIM homeobox transcription factor 1 beta	protein coding gene	http://www.informatics.jax.org/gxd/marker/MGI:1100513?tab=imagestab#gxd=markerMgiId%3DMGI%3A102764%26theilerStage%3D%26assayType%3D%26results%3D25%26startIndex%3D0%26sort%3D%26dir%3Dasc%26tab%3Dimagestab%26theilerStageFilter%3D12%26theilerStageFilter%3D13%26theilerStageFilter%3D14%26wildtypeFilter%3Dwild%20type
NAV2	0.886056	58.3214	0	0	2.44718	TRUE	0.679635	41.1831	0	0	0.110023	6.67091	1.27114e-11	5.27348e-10	11	520	146	20	42	17	2	11	11	11	11	3		Midbrain/R1	No images	NA	NA	No images	NA	Nav2	neuron navigator 2	protein coding gene	http://www.informatics.jax.org/gxd/marker/MGI:2183691?tab=imagestab#gxd=markerMgiId%3DMGI%3A102764%26theilerStage%3D%26assayType%3D%26results%3D25%26startIndex%3D0%26sort%3D%26dir%3Dasc%26tab%3Dimagestab%26theilerStageFilter%3D12%26theilerStageFilter%3D13%26theilerStageFilter%3D14%26wildtypeFilter%3Dwild%20type
DMB/R1X1	0.858485	55.8064	0	0	1.40852	TRUE	0.649592	38.3966	0	0	0.320384	18.93	3.22966e-80	4.5594e-78	5	438	24	46	12	26	26	26	2	5	5	3	1	Midbrain/R1	MB/R1	Yes	High lateral	High lateral	Yes	DMB/R1x1	diencephalon/mesencephalon homeobox 1	protein coding gene	http://www.informatics.jax.org/gxd/marker/MGI:2153518?tab=imagestab#gxd=markerMgiId%3DMGI%3A102764%26theilerStage%3D%26assayType%3D%26results%3D25%26startIndex%3D0%26sort%3D%26dir%3Dasc%26tab%3Dimagestab%26theilerStageFilter%3D12%26theilerStageFilter%3D13%26theilerStageFilter%3D14%26wildtypeFilter%3Dwild%20type
CHST2	0.921608	58.6934	0	0	2.50274	TRUE	0.639476	37.9511	0	0	0.150648	8.93757	1.9891e-19	1.12484e-17	11	450	146	20	42	17	2	11	11	11	11	3		Midbrain/R1	No images	NA	NA	No images	NA	Chst2	carbohydrate sulfotransferase 2	protein coding gene	http://www.informatics.jax.org/gxd/marker/MGI:1891160?tab=imagestab#gxd=markerMgiId%3DMGI%3A102764%26theilerStage%3D%26assayType%3D%26results%3D25%26startIndex%3D0%26sort%3D%26dir%3Dasc%26tab%3Dimagestab%26theilerStageFilter%3D12%26theilerStageFilter%3D13%26theilerStageFilter%3D14%26wildtypeFilter%3Dwild%20type
FGF17	0.861536	60.8784	0	0	2.14762	TRUE	0.560503	36.8119	5.95076e-297	9.41707e-295	0.0795159	5.23456	8.26914e-08	2.70894e-06	2	572	269	28	58	23	23	23	1	2	2	3		Midbrain/R1	MB/R1	Yes	NA	High lateral	NA	Fgf17	fibroblast growth factor 17	protein coding gene	http://www.informatics.jax.org/gxd/marker/MGI:1202401?tab=imagestab#gxd=markerMgiId%3DMGI%3A102764%26theilerStage%3D%26assayType%3D%26results%3D25%26startIndex%3D0%26sort%3D%26dir%3Dasc%26tab%3Dimagestab%26theilerStageFilter%3D12%26theilerStageFilter%3D13%26theilerStageFilter%3D14%26wildtypeFilter%3Dwild%20type
NKD1	0.90295	53.1551	0	0	2.47125	TRUE	0.665195	36.6131	8.83358e-294	1.37572e-291	0.259872	14.3061	1.00181e-46	9.54296e-45	11	755	102	8	36	36	2	11	11	11	11	3	1	Midbrain/R1	MB/R1	Yes	High lateral	Could not determine	NA	Nkd1	naked cuticle 1	protein coding gene	http://www.informatics.jax.org/gxd/marker/MGI:2135954?tab=imagestab#gxd=markerMgiId%3DMGI%3A102764%26theilerStage%3D%26assayType%3D%26results%3D25%26startIndex%3D0%26sort%3D%26dir%3Dasc%26tab%3Dimagestab%26theilerStageFilter%3D12%26theilerStageFilter%3D13%26theilerStageFilter%3D14%26wildtypeFilter%3Dwild%20type
KLHL14	0.868814	52.9049	0	0	1.46582	TRUE	0.644092	36.1819	5.86491e-287	9.06198e-285	0.101058	5.68637	6.48841e-09	2.28176e-07	2	494	37	28	58	23	23	23	1	2	2	3		Midbrain/R1	No images	NA	NA	No images	NA	Klhl14	kelch-like 14	protein coding gene	http://www.informatics.jax.org/gxd/marker/MGI:1921249?tab=imagestab#gxd=markerMgiId%3DMGI%3A102764%26theilerStage%3D%26assayType%3D%26results%3D25%26startIndex%3D0%26sort%3D%26dir%3Dasc%26tab%3Dimagestab%26theilerStageFilter%3D12%26theilerStageFilter%3D13%26theilerStageFilter%3D14%26wildtypeFilter%3Dwild%20type
FGF18	0.88074	51.4449	0	0	1.6152	TRUE	0.637122	34.8825	6.8404e-267	9.79774e-265	0.0573813	3.14503	0.00083035	0.0174267	11	543	64	8	36	36	2	11	11	11	11	3		Midbrain/R1	MB/R1	Yes	NA	Could not determine	NA	Fgf18	fibroblast growth factor 18	protein coding gene	http://www.informatics.jax.org/gxd/marker/MGI:1277980?tab=imagestab#gxd=markerMgiId%3DMGI%3A102764%26theilerStage%3D%26assayType%3D%26results%3D25%26startIndex%3D0%26sort%3D%26dir%3Dasc%26tab%3Dimagestab%26theilerStageFilter%3D12%26theilerStageFilter%3D13%26theilerStageFilter%3D14%26wildtypeFilter%3Dwild%20type
FBLN2	0.910375	44.0681	0	0	1.91128	TRUE	0.77132	34.4509	2.18295e-260	3.08173e-258	0.14069	6.29259	1.56111e-10	6.09019e-09	11	454	64	8	36	36	2	11	11	11	11	3		Midbrain/R1	No images	NA	NA	No images	NA	Fbln2	fibulin 2	protein coding gene	http://www.informatics.jax.org/gxd/marker/MGI:95488?tab=imagestab#gxd=markerMgiId%3DMGI%3A102764%26theilerStage%3D%26assayType%3D%26results%3D25%26startIndex%3D0%26sort%3D%26dir%3Dasc%26tab%3Dimagestab%26theilerStageFilter%3D12%26theilerStageFilter%3D13%26theilerStageFilter%3D14%26wildtypeFilter%3Dwild%20type
TMEM132C	0.83308	52.4628	0	0	2.0022	TRUE	0.558899	32.5398	1.45923e-232	1.94793e-230	0.269369	15.6995	7.61863e-56	8.25969e-54	11	496	159	20	42	17	2	11	11	11	11	3	1	Midbrain/R1	No images	NA	High lateral	No images	NA	Tmem132c	transmeMB/R1rane protein 132C	protein coding gene	http://www.informatics.jax.org/gxd/marker/MGI:2443061?tab=imagestab#gxd=markerMgiId%3DMGI%3A102764%26theilerStage%3D%26assayType%3D%26results%3D25%26startIndex%3D0%26sort%3D%26dir%3Dasc%26tab%3Dimagestab%26theilerStageFilter%3D12%26theilerStageFilter%3D13%26theilerStageFilter%3D14%26wildtypeFilter%3Dwild%20type
SAMD5	0.861824	43.5424	0	0	1.51852	TRUE	0.674479	31.8613	4.59634e-223	6.05329e-221	0.340684	16.094	1.40616e-58	1.58581e-56	5	805	62	4	12	26	26	26	2	5	5	3	1	Midbrain/R1	No images	NA	High lateral	No images	NA	Samd5	sterile alpha motif domain containing 5	protein coding gene	http://www.informatics.jax.org/gxd/marker/MGI:2444815?tab=imagestab#gxd=markerMgiId%3DMGI%3A102764%26theilerStage%3D%26assayType%3D%26results%3D25%26startIndex%3D0%26sort%3D%26dir%3Dasc%26tab%3Dimagestab%26theilerStageFilter%3D12%26theilerStageFilter%3D13%26theilerStageFilter%3D14%26wildtypeFilter%3Dwild%20type
WNT4	0.897432	46.5401	0	0	1.73363	TRUE	0.633766	30.5598	2.09598e-205	2.58675e-203	0.307539	14.8351	4.34611e-50	4.48862e-48	5	613	62	4	12	26	26	26	2	5	5	3	1	Midbrain/R1	Could not determine	NA	High lateral	Could not determine	NA	Wnt4	wingless-type MMTV integration site family, meMB/R1er 4	protein coding gene	http://www.informatics.jax.org/gxd/marker/MGI:98957?tab=imagestab#gxd=markerMgiId%3DMGI%3A102764%26theilerStage%3D%26assayType%3D%26results%3D25%26startIndex%3D0%26sort%3D%26dir%3Dasc%26tab%3Dimagestab%26theilerStageFilter%3D12%26theilerStageFilter%3D13%26theilerStageFilter%3D14%26wildtypeFilter%3Dwild%20type
PCP4L1	0.879476	42.6638	0	0	1.5975	TRUE	0.638192	29.3529	1.0966e-189	1.28854e-187	0.197804	9.10221	4.42556e-20	2.59232e-18	11	790	102	8	36	36	2	11	11	11	11	3		Midbrain/R1	No images	NA	NA	No images	NA	Pcp4l1	Purkinje cell protein 4-like 1	protein coding gene	http://www.informatics.jax.org/gxd/marker/MGI:1913675?tab=imagestab#gxd=markerMgiId%3DMGI%3A102764%26theilerStage%3D%26assayType%3D%26results%3D25%26startIndex%3D0%26sort%3D%26dir%3Dasc%26tab%3Dimagestab%26theilerStageFilter%3D12%26theilerStageFilter%3D13%26theilerStageFilter%3D14%26wildtypeFilter%3Dwild%20type
PANTR1	0.908607	40.0635	0	0	1.69803	TRUE	0.682741	27.9076	1.07861e-171	1.22344e-169	0.106937	4.37299	6.12788e-06	0.000172028	11	837	290	27	56	17	2	11	11	11	11	3		Midbrain/R1	No images	NA	NA	No images	NA	Pantr1	POU domain, class 3, transcription factor 3 adjacent noncoding transcript 1	lncRNA gene	http://www.informatics.jax.org/gxd/marker/MGI:1913547?tab=imagestab#gxd=markerMgiId%3DMGI%3A102764%26theilerStage%3D%26assayType%3D%26results%3D25%26startIndex%3D0%26sort%3D%26dir%3Dasc%26tab%3Dimagestab%26theilerStageFilter%3D12%26theilerStageFilter%3D13%26theilerStageFilter%3D14%26wildtypeFilter%3Dwild%20type
LGI1	0.881531	33.9152	1.99049e-252	1.29335e-250	1.3351	TRUE	0.736518	26.0453	7.60989e-150	7.98551e-148	0.219585	7.77298	3.83297e-15	1.8037e-13	11	823	64	8	36	36	2	11	11	11	11	3		Midbrain/R1	No images	NA	NA	No images	NA	Lgi1	leucine-rich repeat LGI family, meMB/R1er 1	protein coding gene	http://www.informatics.jax.org/gxd/marker/MGI:1861691?tab=imagestab#gxd=markerMgiId%3DMGI%3A102764%26theilerStage%3D%26assayType%3D%26results%3D25%26startIndex%3D0%26sort%3D%26dir%3Dasc%26tab%3Dimagestab%26theilerStageFilter%3D12%26theilerStageFilter%3D13%26theilerStageFilter%3D14%26wildtypeFilter%3Dwild%20type
POU3F3	0.846168	38.7426	0	0	1.58554	TRUE	0.59454	25.1549	6.24383e-140	6.21942e-138	0.115904	4.91179	4.51243e-07	1.39885e-05	11	653	290	27	56	17	2	11	11	11	11	3		Midbrain/R1	MB/R1	Yes	NA	Midline excluded	NA	Pou3f3	POU domain, class 3, transcription factor 3	protein coding gene	http://www.informatics.jax.org/gxd/marker/MGI:102564?tab=imagestab#gxd=markerMgiId%3DMGI%3A102764%26theilerStage%3D%26assayType%3D%26results%3D25%26startIndex%3D0%26sort%3D%26dir%3Dasc%26tab%3Dimagestab%26theilerStageFilter%3D12%26theilerStageFilter%3D13%26theilerStageFilter%3D14%26wildtypeFilter%3Dwild%20type
CELRR	0.916715	29.3664	7.38871e-190	4.20257e-188	1.2191	TRUE	0.782004	23.1427	8.6039e-119	8.00163e-117	0.121551	3.59499	0.000162205	0.00383487	11	710	64	8	36	36	2	11	11	11	11	3		Midbrain/R1	No images	NA	NA	No images	NA	Celrr	cerebellum expressed regulatory RNA	lncRNA gene	http://www.informatics.jax.org/gxd/marker/MGI:2685664?tab=imagestab#gxd=markerMgiId%3DMGI%3A102764%26theilerStage%3D%26assayType%3D%26results%3D25%26startIndex%3D0%26sort%3D%26dir%3Dasc%26tab%3Dimagestab%26theilerStageFilter%3D12%26theilerStageFilter%3D13%26theilerStageFilter%3D14%26wildtypeFilter%3Dwild%20type
CNPY1	0.832352	30.6826	4.85531e-207	2.89592e-205	1.24363	TRUE	0.580085	19.9368	9.76298e-89	7.88391e-87	0.128779	4.43786	4.54299e-06	0.000129952	11	471	102	8	36	36	2	11	11	11	11	3		Midbrain/R1	Could not determine	NA	NA	Could not determine	NA	Cnpy1	canopy FGF signaling regulator 1	protein coding gene	http://www.informatics.jax.org/gxd/marker/MGI:2442451?tab=imagestab#gxd=markerMgiId%3DMGI%3A102764%26theilerStage%3D%26assayType%3D%26results%3D25%26startIndex%3D0%26sort%3D%26dir%3Dasc%26tab%3Dimagestab%26theilerStageFilter%3D12%26theilerStageFilter%3D13%26theilerStageFilter%3D14%26wildtypeFilter%3Dwild%20type
ARL4A	0.901646	59.2683	0	0	3.10798	TRUE	0.284009	17.521	4.9542e-69	3.47201e-67	0.644705	39.8519	0	0	1	479	107	94	33	33	33	3	3	16	1	3	5	Midbrain/R1	MB/R1	Yes	High midline	High midline	Yes	Arl4a	ADP-ribosylation factor-like 4A	protein coding gene	http://www.informatics.jax.org/gxd/marker/MGI:99437?tab=imagestab#gxd=markerMgiId%3DMGI%3A102764%26theilerStage%3D%26assayType%3D%26results%3D25%26startIndex%3D0%26sort%3D%26dir%3Dasc%26tab%3Dimagestab%26theilerStageFilter%3D12%26theilerStageFilter%3D13%26theilerStageFilter%3D14%26wildtypeFilter%3Dwild%20type
ELMOD1	0.886859	22.1134	1.17488e-108	4.96867e-107	1.20721	TRUE	0.720275	16.7283	4.07824e-63	2.72201e-61	0.0691095	1.60558	0.0541829	0.50035	2	353	41	49	22	45	10	21	1	2	2	3		Midbrain/R1	No images	NA	NA	No images	NA	Elmod1	ELMO/CED-12 domain containing 1	protein coding gene	http://www.informatics.jax.org/gxd/marker/MGI:3583900?tab=imagestab#gxd=markerMgiId%3DMGI%3A102764%26theilerStage%3D%26assayType%3D%26results%3D25%26startIndex%3D0%26sort%3D%26dir%3Dasc%26tab%3Dimagestab%26theilerStageFilter%3D12%26theilerStageFilter%3D13%26theilerStageFilter%3D14%26wildtypeFilter%3Dwild%20type
CCNJL	0.910691	23.1631	5.36299e-119	2.40819e-117	2.05346	TRUE	0.700325	16.4476	4.3642e-61	2.86417e-59	0.270316	6.34219	1.13262e-10	4.46293e-09	11	288	237	8	36	36	2	11	11	11	11	3		Midbrain/R1	No images	NA	NA	No images	NA	Ccnjl	cyclin J-like	protein coding gene	http://www.informatics.jax.org/gxd/marker/MGI:2685723?tab=imagestab#gxd=markerMgiId%3DMGI%3A102764%26theilerStage%3D%26assayType%3D%26results%3D25%26startIndex%3D0%26sort%3D%26dir%3Dasc%26tab%3Dimagestab%26theilerStageFilter%3D12%26theilerStageFilter%3D13%26theilerStageFilter%3D14%26wildtypeFilter%3Dwild%20type
WIF1	0.916153	48.7231	0	0	1.34487	TRUE	0.321468	15.7962	1.65229e-56	1.0459e-54	0.616765	30.3976	2.95041e-203	8.15436e-201	1	719	179	11	13	18	18	3	3	16	1	3	6	Midbrain/R1	MB/R1	Yes	High midline	High midline	Yes	Wif1	Wnt inhibitory factor 1	protein coding gene	http://www.informatics.jax.org/gxd/marker/MGI:1344332?tab=imagestab#gxd=markerMgiId%3DMGI%3A102764%26theilerStage%3D%26assayType%3D%26results%3D25%26startIndex%3D0%26sort%3D%26dir%3Dasc%26tab%3Dimagestab%26theilerStageFilter%3D12%26theilerStageFilter%3D13%26theilerStageFilter%3D14%26wildtypeFilter%3Dwild%20type
ISM1	0.828198	23.6886	2.36093e-124	1.07741e-122	1.2366	TRUE	0.590168	15.4911	1.9912e-54	1.2326e-52	0.0827463	2.17864	0.0146791	0.221746	2	830	41	49	22	45	10	21	1	2	2	3		Midbrain/R1	MB/R1	Yes	NA	High lateral	NA	Ism1	isthmin 1, angiogenesis inhibitor	protein coding gene	http://www.informatics.jax.org/gxd/marker/MGI:2442963?tab=imagestab#gxd=markerMgiId%3DMGI%3A102764%26theilerStage%3D%26assayType%3D%26results%3D25%26startIndex%3D0%26sort%3D%26dir%3Dasc%26tab%3Dimagestab%26theilerStageFilter%3D12%26theilerStageFilter%3D13%26theilerStageFilter%3D14%26wildtypeFilter%3Dwild%20type
SGTB	0.86356	18.7576	8.39223e-79	2.94599e-77	1.52332	TRUE	0.703591	14.1875	5.47482e-46	3.1413e-44	0.0364351	0.735744	0.230943	0.50035	2	299	46	18	22	45	10	21	1	2	2	3		Midbrain/R1	No images	NA	NA	No images	NA	Sgtb	small glutamine-rich tetratricopeptide repeat (TPR)-containing, beta	protein coding gene	http://www.informatics.jax.org/gxd/marker/MGI:2444615?tab=imagestab#gxd=markerMgiId%3DMGI%3A102764%26theilerStage%3D%26assayType%3D%26results%3D25%26startIndex%3D0%26sort%3D%26dir%3Dasc%26tab%3Dimagestab%26theilerStageFilter%3D12%26theilerStageFilter%3D13%26theilerStageFilter%3D14%26wildtypeFilter%3Dwild%20type
NOTUM	0.872187	21.8057	1.02496e-105	4.27932e-104	1.17741	TRUE	0.602043	13.9073	2.86085e-44	1.6272e-42	0.123319	2.85456	0.00215481	0.0423262	2	229	41	49	22	45	10	21	1	2	2	3		Midbrain/R1	No images	NA	NA	No images	NA	Notum	notum palmitoleoyl-protein carboxylesterase	protein coding gene	http://www.informatics.jax.org/gxd/marker/MGI:1924833?tab=imagestab#gxd=markerMgiId%3DMGI%3A102764%26theilerStage%3D%26assayType%3D%26results%3D25%26startIndex%3D0%26sort%3D%26dir%3Dasc%26tab%3Dimagestab%26theilerStageFilter%3D12%26theilerStageFilter%3D13%26theilerStageFilter%3D14%26wildtypeFilter%3Dwild%20type
SYT7	0.806144	20.373	1.45214e-92	5.59829e-91	1.62542	TRUE	0.598134	13.8922	3.53331e-44	2.00388e-42	0.339812	7.90298	1.36161e-15	6.51682e-14	5	321	122	32	65	3	13	13	2	5	5	3		Midbrain/R1	No images	NA	NA	No images	NA	Syt7	synaptotagmin VII	protein coding gene	http://www.informatics.jax.org/gxd/marker/MGI:1859545?tab=imagestab#gxd=markerMgiId%3DMGI%3A102764%26theilerStage%3D%26assayType%3D%26results%3D25%26startIndex%3D0%26sort%3D%26dir%3Dasc%26tab%3Dimagestab%26theilerStageFilter%3D12%26theilerStageFilter%3D13%26theilerStageFilter%3D14%26wildtypeFilter%3Dwild%20type
SOX21	0.803834	23.1262	1.26316e-118	5.65914e-117	2.93857	TRUE	0.49779	13.3846	3.71988e-41	2.01089e-39	0.10177	2.73727	0.00309753	0.0580543	13	325	162	25	9	2	27	27	6	13	13	3		Midbrain/R1	No images	NA	NA	No images	NA	Sox21	SRY (sex determining region Y)-box 21	protein coding gene	http://www.informatics.jax.org/gxd/marker/MGI:2654070?tab=imagestab#gxd=markerMgiId%3DMGI%3A102764%26theilerStage%3D%26assayType%3D%26results%3D25%26startIndex%3D0%26sort%3D%26dir%3Dasc%26tab%3Dimagestab%26theilerStageFilter%3D12%26theilerStageFilter%3D13%26theilerStageFilter%3D14%26wildtypeFilter%3Dwild%20type
CAR3	0.891026	18.9435	2.49824e-80	8.81709e-79	1.38433	TRUE	0.668796	13.1797	5.74441e-40	3.05481e-38	0.163353	3.22168	0.000637211	0.0135325	2	177	295	49	22	45	10	21	1	2	2	3		Midbrain/R1	MB/R1	Yes	NA	Could not determine	NA	Car3	carbonic anhydrase 3	protein coding gene	http://www.informatics.jax.org/gxd/marker/MGI:88270?tab=imagestab#gxd=markerMgiId%3DMGI%3A102764%26theilerStage%3D%26assayType%3D%26results%3D25%26startIndex%3D0%26sort%3D%26dir%3Dasc%26tab%3Dimagestab%26theilerStageFilter%3D12%26theilerStageFilter%3D13%26theilerStageFilter%3D14%26wildtypeFilter%3Dwild%20type
POU3F4	0.889441	25.4048	1.11588e-142	5.46058e-141	1.63549	TRUE	0.479073	12.7649	1.28713e-37	6.57741e-36	0.40497	10.8111	1.5257e-27	1.06544e-25	1	277	208	53	33	33	33	3	3	16	1	3	6	Midbrain/R1	MB/R1	Yes	High midline	Could not determine	NA	Pou3f4	POU domain, class 3, transcription factor 4	protein coding gene	http://www.informatics.jax.org/gxd/marker/MGI:101894?tab=imagestab#gxd=markerMgiId%3DMGI%3A102764%26theilerStage%3D%26assayType%3D%26results%3D25%26startIndex%3D0%26sort%3D%26dir%3Dasc%26tab%3Dimagestab%26theilerStageFilter%3D12%26theilerStageFilter%3D13%26theilerStageFilter%3D14%26wildtypeFilter%3Dwild%20type
PRSS35	0.800715	20.3772	1.33213e-92	5.14575e-91	1.0569	TRUE	0.538381	12.5248	2.73098e-36	1.36015e-34	0.186708	4.34535	6.9528e-06	0.000194075	5	348	213	32	65	3	13	13	2	5	5	3		Midbrain/R1	No images	NA	NA	No images	NA	Prss35	protease, serine 35	protein coding gene	http://www.informatics.jax.org/gxd/marker/MGI:2444800?tab=imagestab#gxd=markerMgiId%3DMGI%3A102764%26theilerStage%3D%26assayType%3D%26results%3D25%26startIndex%3D0%26sort%3D%26dir%3Dasc%26tab%3Dimagestab%26theilerStageFilter%3D12%26theilerStageFilter%3D13%26theilerStageFilter%3D14%26wildtypeFilter%3Dwild%20type
PIM1	0.837393	24.1518	3.57299e-129	1.6536e-127	2.41593	TRUE	0.454735	12.43	8.9825e-36	4.41763e-34	0.401449	10.9835	2.29514e-28	1.6437e-26	1	540	68	53	33	33	33	3	3	16	1	3	5	Midbrain/R1	MB/R1	Yes	High midline	Could not determine	NA	Pim1	proviral integration site 1	protein coding gene	http://www.informatics.jax.org/gxd/marker/MGI:97584?tab=imagestab#gxd=markerMgiId%3DMGI%3A102764%26theilerStage%3D%26assayType%3D%26results%3D25%26startIndex%3D0%26sort%3D%26dir%3Dasc%26tab%3Dimagestab%26theilerStageFilter%3D12%26theilerStageFilter%3D13%26theilerStageFilter%3D14%26wildtypeFilter%3Dwild%20type
GADD45G	0.690763	46.3765	0	0	1.0633	TRUE	0.163529	12.3555	2.27375e-35	1.10167e-33	0.0829572	6.41149	7.20531e-11	2.88551e-09	12	850	95	63	63	31	31	5	5	12	12	3		Midbrain/R1	MB/R1	Yes	NA	Could not determine	NA	Gadd45g	growth arrest and DNA-damage-inducible 45 gamma	protein coding gene	http://www.informatics.jax.org/gxd/marker/MGI:1346325?tab=imagestab#gxd=markerMgiId%3DMGI%3A102764%26theilerStage%3D%26assayType%3D%26results%3D25%26startIndex%3D0%26sort%3D%26dir%3Dasc%26tab%3Dimagestab%26theilerStageFilter%3D12%26theilerStageFilter%3D13%26theilerStageFilter%3D14%26wildtypeFilter%3Dwild%20type
ADGRG1	0.867354	15.7382	4.13695e-56	1.24891e-54	1.30703	TRUE	0.73709	12.3028	4.37275e-35	2.09796e-33	0.172049	2.87058	0.00204862	0.0404427	2	396	256	119	30	9	10	21	1	2	2	3		Midbrain/R1	No images	NA	NA	No images	NA	Adgrg1	adhesion G protein-coupled receptor G1	protein coding gene	http://www.informatics.jax.org/gxd/marker/MGI:1340051?tab=imagestab#gxd=markerMgiId%3DMGI%3A102764%26theilerStage%3D%26assayType%3D%26results%3D25%26startIndex%3D0%26sort%3D%26dir%3Dasc%26tab%3Dimagestab%26theilerStageFilter%3D12%26theilerStageFilter%3D13%26theilerStageFilter%3D14%26wildtypeFilter%3Dwild%20type
GALNT10	0.830753	17.2438	6.23277e-67	2.01824e-65	1.51408	TRUE	0.636072	12.1856	1.85368e-34	8.76499e-33	0.210594	4.03268	2.75722e-05	0.000716829	2	330	14	99	21	13	8	18	18	2	2	3		Midbrain/R1	No images	NA	NA	No images	NA	Galnt10	polypeptide N-acetylgalactosaminyltransferase 10	protein coding gene	http://www.informatics.jax.org/gxd/marker/MGI:1890480?tab=imagestab#gxd=markerMgiId%3DMGI%3A102764%26theilerStage%3D%26assayType%3D%26results%3D25%26startIndex%3D0%26sort%3D%26dir%3Dasc%26tab%3Dimagestab%26theilerStageFilter%3D12%26theilerStageFilter%3D13%26theilerStageFilter%3D14%26wildtypeFilter%3Dwild%20type
ERICH2	0.906344	14.3952	2.77149e-47	7.56397e-46	1.01513	TRUE	0.771923	11.384	2.51117e-30	1.1328e-28	0.160267	2.36271	0.00907087	0.147254	2	162	256	119	30	9	10	21	1	2	2	3		Midbrain/R1	Global	No	NA	Could not determine	NA	Erich2	glutamate rich 2	protein coding gene	http://www.informatics.jax.org/gxd/marker/MGI:1913998?tab=imagestab#gxd=markerMgiId%3DMGI%3A102764%26theilerStage%3D%26assayType%3D%26results%3D25%26startIndex%3D0%26sort%3D%26dir%3Dasc%26tab%3Dimagestab%26theilerStageFilter%3D12%26theilerStageFilter%3D13%26theilerStageFilter%3D14%26wildtypeFilter%3Dwild%20type
CACNB3	0.870233	15.2516	8.03315e-53	2.34925e-51	1.4823	TRUE	0.686968	11.1448	3.79585e-29	1.67009e-27	0.402312	6.51651	3.59804e-11	1.45277e-09	5	398	298	32	65	3	13	13	2	5	5	3		Midbrain/R1	No images	NA	NA	No images	NA	Cacnb3	calcium channel, voltage-dependent, beta 3 subunit	protein coding gene	http://www.informatics.jax.org/gxd/marker/MGI:103307?tab=imagestab#gxd=markerMgiId%3DMGI%3A102764%26theilerStage%3D%26assayType%3D%26results%3D25%26startIndex%3D0%26sort%3D%26dir%3Dasc%26tab%3Dimagestab%26theilerStageFilter%3D12%26theilerStageFilter%3D13%26theilerStageFilter%3D14%26wildtypeFilter%3Dwild%20type
LAPTM4B	0.864448	14.6397	7.83623e-49	2.16883e-47	2.0489	TRUE	0.690879	10.8234	1.33346e-27	5.61512e-26	0.293335	4.59351	2.17927e-06	6.46955e-05	5	519	122	32	65	3	13	13	2	5	5	3		Midbrain/R1	No images	NA	NA	No images	NA	Laptm4b	lysosomal-associated protein transmeMB/R1rane 4B	protein coding gene	http://www.informatics.jax.org/gxd/marker/MGI:1890494?tab=imagestab#gxd=markerMgiId%3DMGI%3A102764%26theilerStage%3D%26assayType%3D%26results%3D25%26startIndex%3D0%26sort%3D%26dir%3Dasc%26tab%3Dimagestab%26theilerStageFilter%3D12%26theilerStageFilter%3D13%26theilerStageFilter%3D14%26wildtypeFilter%3Dwild%20type
PKNOX2	0.693556	15.636	2.07041e-55	6.19325e-54	1.80381	TRUE	0.493143	10.3425	2.26257e-25	9.07605e-24	0.0460245	0.966343	0.166936	0.50035	2	720	225	18	22	45	10	21	1	2	2	3		Midbrain/R1	Could not determine	NA	NA	Could not determine	NA	Pknox2	Pbx/knotted 1 homeobox 2	protein coding gene	http://www.informatics.jax.org/gxd/marker/MGI:2445415?tab=imagestab#gxd=markerMgiId%3DMGI%3A102764%26theilerStage%3D%26assayType%3D%26results%3D25%26startIndex%3D0%26sort%3D%26dir%3Dasc%26tab%3Dimagestab%26theilerStageFilter%3D12%26theilerStageFilter%3D13%26theilerStageFilter%3D14%26wildtypeFilter%3Dwild%20type
C130073E24RIK	0.835521	15.6099	3.11451e-55	9.3023e-54	1.08784	TRUE	0.580427	10.0823	3.30697e-24	1.29526e-22	0.184054	3.20568	0.000673708	0.0142613	2	367	295	49	22	45	10	21	1	2	2	3		Midbrain/R1	No images	NA	NA	No images	NA	C130073E24Rik	RIKEN cDNA C130073E24 gene	lncRNA gene	http://www.informatics.jax.org/gxd/marker/MGI:2442759?tab=imagestab#gxd=markerMgiId%3DMGI%3A102764%26theilerStage%3D%26assayType%3D%26results%3D25%26startIndex%3D0%26sort%3D%26dir%3Dasc%26tab%3Dimagestab%26theilerStageFilter%3D12%26theilerStageFilter%3D13%26theilerStageFilter%3D14%26wildtypeFilter%3Dwild%20type
HOXB2	0.944197	358.729	0	0	3.14398	TRUE	0.720218	253.418	0	0	0.0392624	13.7827	1.62054e-43	1.49295e-41	10	800	114	89	18	4	9	9	4	4	10	4	5	Posterior Hindbrain	Posterior HB	Yes	High midline	Global	No	Hoxb2	homeobox B2	protein coding gene	http://www.informatics.jax.org/gxd/marker/MGI:96183?tab=imagestab#gxd=markerMgiId%3DMGI%3A102764%26theilerStage%3D%26assayType%3D%26results%3D25%26startIndex%3D0%26sort%3D%26dir%3Dasc%26tab%3Dimagestab%26theilerStageFilter%3D12%26theilerStageFilter%3D13%26theilerStageFilter%3D14%26wildtypeFilter%3Dwild%20type
HOXA2	0.941963	264.571	0	0	2.63235	TRUE	0.742311	193.046	0	0	0.0690251	17.9022	5.67265e-72	7.42096e-70	10	817	114	89	18	4	9	9	4	4	10	4	4	Posterior Hindbrain	Posterior HB	Yes	High midline	Global	No	Hoxa2	homeobox A2	protein coding gene	http://www.informatics.jax.org/gxd/marker/MGI:96174?tab=imagestab#gxd=markerMgiId%3DMGI%3A102764%26theilerStage%3D%26assayType%3D%26results%3D25%26startIndex%3D0%26sort%3D%26dir%3Dasc%26tab%3Dimagestab%26theilerStageFilter%3D12%26theilerStageFilter%3D13%26theilerStageFilter%3D14%26wildtypeFilter%3Dwild%20type
EGR2	0.917753	301.901	0	0	2.53075	TRUE	0.547149	164.497	0	0	0.0403684	12.1199	4.14414e-34	3.36035e-32	10	775	161	26	53	4	9	9	4	4	10	4	3	Posterior Hindbrain	R3, R5 (Posterior HB)	Yes	NA	Midline excluded	NA	Egr2	early growth response 2	protein coding gene	http://www.informatics.jax.org/gxd/marker/MGI:95296?tab=imagestab#gxd=markerMgiId%3DMGI%3A102764%26theilerStage%3D%26assayType%3D%26results%3D25%26startIndex%3D0%26sort%3D%26dir%3Dasc%26tab%3Dimagestab%26theilerStageFilter%3D12%26theilerStageFilter%3D13%26theilerStageFilter%3D14%26wildtypeFilter%3Dwild%20type
MAFB	0.915688	325.276	0	0	3.6134	TRUE	0.27103	87.0179	0	0	0.0140475	4.51212	3.20914e-06	9.34316e-05	10	7	267	66	66	11	11	24	4	4	10	4		Posterior Hindbrain	R5, R6 (Posterior HB)	Yes	NA	Midline excluded	NA	Mafb	v-maf musculoaponeurotic fibrosarcoma oncogene family, protein B (avian)	protein coding gene	http://www.informatics.jax.org/gxd/marker/MGI:104555?tab=imagestab#gxd=markerMgiId%3DMGI%3A102764%26theilerStage%3D%26assayType%3D%26results%3D25%26startIndex%3D0%26sort%3D%26dir%3Dasc%26tab%3Dimagestab%26theilerStageFilter%3D12%26theilerStageFilter%3D13%26theilerStageFilter%3D14%26wildtypeFilter%3Dwild%20type
EPHA4	0.90583	102.372	0	0	3.16204	TRUE	0.70893	74.3739	0	0	0.0811408	8.50309	9.23047e-18	4.77915e-16	0	699	174	67	67	10	7	15	15	15	0	4		Posterior Hindbrain	R3, R5 (Posterior HB)	Yes	NA	Global	NA	Epha4	Eph receptor A4	protein coding gene	http://www.informatics.jax.org/gxd/marker/MGI:98277?tab=imagestab#gxd=markerMgiId%3DMGI%3A102764%26theilerStage%3D%26assayType%3D%26results%3D25%26startIndex%3D0%26sort%3D%26dir%3Dasc%26tab%3Dimagestab%26theilerStageFilter%3D12%26theilerStageFilter%3D13%26theilerStageFilter%3D14%26wildtypeFilter%3Dwild%20type
CYP26B1	0.91465	114.691	0	0	1.95566	TRUE	0.636181	74.0472	0	0	0.0386947	4.49182	3.53081e-06	0.00010189	10	844	161	26	53	4	9	9	4	4	10	4		Posterior Hindbrain	R3, R5 (Posterior HB)	Yes	NA	Midline excluded	NA	Cyp26b1	cytochrome P450, family 26, subfamily b, polypeptide 1	protein coding gene	http://www.informatics.jax.org/gxd/marker/MGI:2176159?tab=imagestab#gxd=markerMgiId%3DMGI%3A102764%26theilerStage%3D%26assayType%3D%26results%3D25%26startIndex%3D0%26sort%3D%26dir%3Dasc%26tab%3Dimagestab%26theilerStageFilter%3D12%26theilerStageFilter%3D13%26theilerStageFilter%3D14%26wildtypeFilter%3Dwild%20type
ZFP703	0.918974	85.5564	0	0	2.1717	TRUE	0.73483	63.5691	0	0	0.126115	10.8822	7.00781e-28	4.96441e-26	10	799	132	22	18	4	9	9	4	4	10	4	0	Posterior Hindbrain	No images	NA	High midline	No images	NA	Zfp703	zinc finger protein 703	protein coding gene	http://www.informatics.jax.org/gxd/marker/MGI:2662729?tab=imagestab#gxd=markerMgiId%3DMGI%3A102764%26theilerStage%3D%26assayType%3D%26results%3D25%26startIndex%3D0%26sort%3D%26dir%3Dasc%26tab%3Dimagestab%26theilerStageFilter%3D12%26theilerStageFilter%3D13%26theilerStageFilter%3D14%26wildtypeFilter%3Dwild%20type
NAB2	0.907194	84.6305	0	0	1.69689	TRUE	0.557513	47.9275	0	0	0.0305301	2.61876	0.00441248	0.0798029	10	566	161	26	53	4	9	9	4	4	10	4		Posterior Hindbrain	R3, R5 (Posterior HB)	Yes	NA	Global	NA	Nab2	Ngfi-A binding protein 2	protein coding gene	http://www.informatics.jax.org/gxd/marker/MGI:107563?tab=imagestab#gxd=markerMgiId%3DMGI%3A102764%26theilerStage%3D%26assayType%3D%26results%3D25%26startIndex%3D0%26sort%3D%26dir%3Dasc%26tab%3Dimagestab%26theilerStageFilter%3D12%26theilerStageFilter%3D13%26theilerStageFilter%3D14%26wildtypeFilter%3Dwild%20type
PDE11A	0.905067	181.895	0	0	1.71144	TRUE	0.244923	43.9977	0	0	0.0183746	3.30431	0.00047605	0.0102994	10	7	267	66	66	11	11	24	4	4	10	4		Posterior Hindbrain	No images	NA	NA	No images	NA	Pde11a	phosphodiesterase 11A	protein coding gene	http://www.informatics.jax.org/gxd/marker/MGI:3036251?tab=imagestab#gxd=markerMgiId%3DMGI%3A102764%26theilerStage%3D%26assayType%3D%26results%3D25%26startIndex%3D0%26sort%3D%26dir%3Dasc%26tab%3Dimagestab%26theilerStageFilter%3D12%26theilerStageFilter%3D13%26theilerStageFilter%3D14%26wildtypeFilter%3Dwild%20type
MEIS2	0.91752	57.2133	0	0	3.69065	TRUE	0.70658	41.1181	0	0	0.166999	9.69685	1.55479e-22	9.74747e-21	0	511	255	67	67	10	7	15	15	15	0	4		Posterior Hindbrain	Posterior HB, weaker MB/R1	Yes	NA	Could not determine	NA	Meis2	Meis homeobox 2	protein coding gene	http://www.informatics.jax.org/gxd/marker/MGI:108564?tab=imagestab#gxd=markerMgiId%3DMGI%3A102764%26theilerStage%3D%26assayType%3D%26results%3D25%26startIndex%3D0%26sort%3D%26dir%3Dasc%26tab%3Dimagestab%26theilerStageFilter%3D12%26theilerStageFilter%3D13%26theilerStageFilter%3D14%26wildtypeFilter%3Dwild%20type
EPHA7	0.861161	61.3056	0	0	2.88799	TRUE	0.608896	40.6326	0	0	0.0284063	1.89626	0.0289631	0.382163	4	579	289	16	4	21	21	12	12	1	4	4		Posterior Hindbrain	R3 (Posterior HB), FB	No	NA	Midline excluded	NA	Epha7	Eph receptor A7	protein coding gene	http://www.informatics.jax.org/gxd/marker/MGI:95276?tab=imagestab#gxd=markerMgiId%3DMGI%3A102764%26theilerStage%3D%26assayType%3D%26results%3D25%26startIndex%3D0%26sort%3D%26dir%3Dasc%26tab%3Dimagestab%26theilerStageFilter%3D12%26theilerStageFilter%3D13%26theilerStageFilter%3D14%26wildtypeFilter%3Dwild%20type
HOXB3	0.915025	138.573	0	0	1.13418	TRUE	0.285452	38.6675	0	0	0.0203339	2.75786	0.00290903	0.054783	10	7	267	66	66	11	11	24	4	4	10	4		Posterior Hindbrain	R5 (Posterior HB)	Yes	NA	Could not determine	NA	Hoxb3	homeobox B3	protein coding gene	http://www.informatics.jax.org/gxd/marker/MGI:96184?tab=imagestab#gxd=markerMgiId%3DMGI%3A102764%26theilerStage%3D%26assayType%3D%26results%3D25%26startIndex%3D0%26sort%3D%26dir%3Dasc%26tab%3Dimagestab%26theilerStageFilter%3D12%26theilerStageFilter%3D13%26theilerStageFilter%3D14%26wildtypeFilter%3Dwild%20type
NR2F2	0.873013	62.3645	0	0	3.27884	TRUE	0.550739	36.6355	3.88895e-294	6.10503e-292	0.164504	10.9261	4.32435e-28	3.0857e-26	0	531	265	21	19	10	7	15	15	15	0	4	0	Posterior Hindbrain	MB/R1, HB	No	High midline	Could not determine	NA	Nr2f2	nuclear receptor subfamily 2, group F, meMB/R1er 2	protein coding gene	http://www.informatics.jax.org/gxd/marker/MGI:1352452?tab=imagestab#gxd=markerMgiId%3DMGI%3A102764%26theilerStage%3D%26assayType%3D%26results%3D25%26startIndex%3D0%26sort%3D%26dir%3Dasc%26tab%3Dimagestab%26theilerStageFilter%3D12%26theilerStageFilter%3D13%26theilerStageFilter%3D14%26wildtypeFilter%3Dwild%20type
COL1A1	0.891283	68.2423	0	0	1.34303	TRUE	0.481797	33.9426	7.85055e-253	1.10037e-250	0.0380691	2.67678	0.00371669	0.068353	10	860	199	26	53	4	9	9	4	4	10	4		Posterior Hindbrain	R3, R5 (Posterior HB)	Yes	NA	Could not determine	NA	Col1a1	collagen, type I, alpha 1	protein coding gene	http://www.informatics.jax.org/gxd/marker/MGI:88467?tab=imagestab#gxd=markerMgiId%3DMGI%3A102764%26theilerStage%3D%26assayType%3D%26results%3D25%26startIndex%3D0%26sort%3D%26dir%3Dasc%26tab%3Dimagestab%26theilerStageFilter%3D12%26theilerStageFilter%3D13%26theilerStageFilter%3D14%26wildtypeFilter%3Dwild%20type
KCNA1	0.871568	79.6269	0	0	1.91611	TRUE	0.377264	31.3872	1.51406e-216	1.95463e-214	0.114151	9.50146	1.03488e-21	6.32631e-20	10	733	142	38	3	11	11	24	4	4	10	4		Posterior Hindbrain	No images	NA	NA	No images	NA	Kcna1	potassium voltage-gated channel, shaker-related subfamily, meMB/R1er 1	protein coding gene	http://www.informatics.jax.org/gxd/marker/MGI:96654?tab=imagestab#gxd=markerMgiId%3DMGI%3A102764%26theilerStage%3D%26assayType%3D%26results%3D25%26startIndex%3D0%26sort%3D%26dir%3Dasc%26tab%3Dimagestab%26theilerStageFilter%3D12%26theilerStageFilter%3D13%26theilerStageFilter%3D14%26wildtypeFilter%3Dwild%20type
GBX1	0.913674	45.4507	0	0	1.0268	TRUE	0.655632	30.0366	1.6334e-198	1.99082e-196	0.0548354	2.5074	0.00608108	0.104859	10	718	74	2	28	11	11	24	4	4	10	4		Posterior Hindbrain	Posterior HB	Yes	NA	Could not determine	NA	Gbx1	gastrulation brain homeobox 1	protein coding gene	http://www.informatics.jax.org/gxd/marker/MGI:95667?tab=imagestab#gxd=markerMgiId%3DMGI%3A102764%26theilerStage%3D%26assayType%3D%26results%3D25%26startIndex%3D0%26sort%3D%26dir%3Dasc%26tab%3Dimagestab%26theilerStageFilter%3D12%26theilerStageFilter%3D13%26theilerStageFilter%3D14%26wildtypeFilter%3Dwild%20type
PKDCC	0.923386	64.6149	0	0	2.549	TRUE	0.46202	29.9481	2.33074e-197	2.82322e-195	0.343888	22.2837	2.65864e-110	4.96863e-108	4	612	205	102	15	32	32	12	12	1	4	4	4	Posterior Hindbrain	HB	Yes	High midline	High lateral	No	Pkdcc	protein kinase domain containing, cytoplasmic	protein coding gene	http://www.informatics.jax.org/gxd/marker/MGI:2147077?tab=imagestab#gxd=markerMgiId%3DMGI%3A102764%26theilerStage%3D%26assayType%3D%26results%3D25%26startIndex%3D0%26sort%3D%26dir%3Dasc%26tab%3Dimagestab%26theilerStageFilter%3D12%26theilerStageFilter%3D13%26theilerStageFilter%3D14%26wildtypeFilter%3Dwild%20type
SEMA4F	0.885018	62.5054	0	0	1.42849	TRUE	0.458672	29.6794	7.07483e-194	8.46521e-192	0.0526178	3.39992	0.000337024	0.00756974	10	818	199	26	53	4	9	9	4	4	10	4		Posterior Hindbrain	No images	NA	NA	No images	NA	Sema4f	sema domain, immunoglobulin domain (Ig), TM domain, and short cytoplasmic domain	protein coding gene	http://www.informatics.jax.org/gxd/marker/MGI:1340055?tab=imagestab#gxd=markerMgiId%3DMGI%3A102764%26theilerStage%3D%26assayType%3D%26results%3D25%26startIndex%3D0%26sort%3D%26dir%3Dasc%26tab%3Dimagestab%26theilerStageFilter%3D12%26theilerStageFilter%3D13%26theilerStageFilter%3D14%26wildtypeFilter%3Dwild%20type
FAM84A	0.88501	51.0873	0	0	1.52389	TRUE	0.559803	29.5263	6.61677e-192	7.82174e-190	0.0627073	3.30466	0.000475459	0.0102994	10	671	199	26	53	4	9	9	4	4	10	4		Posterior Hindbrain	No images	NA	NA	No images	NA	Lratd1	LRAT domain containing 1	protein coding gene	http://www.informatics.jax.org/gxd/marker/MGI:2145011?tab=imagestab#gxd=markerMgiId%3DMGI%3A2145011%26theilerStage%3D%26assayType%3D%26results%3D25%26startIndex%3D0%26sort%3D%26dir%3Dasc%26tab%3Dimagestab%26theilerStageFilter%3D12%26theilerStageFilter%3D13%26theilerStageFilter%3D14%26wildtypeFilter%3Dwild%20type
PPP1R1B	0.880347	57.1343	0	0	1.3213	TRUE	0.480413	29.0636	5.17599e-186	5.97462e-184	0.033982	2.05264	0.0200538	0.285073	10	848	199	26	53	4	9	9	4	4	10	4		Posterior Hindbrain	No images	NA	NA	No images	NA	Ppp1r1b	protein phosphatase 1, regulatory inhibitor subunit 1B	protein coding gene	http://www.informatics.jax.org/gxd/marker/MGI:94860?tab=imagestab#gxd=markerMgiId%3DMGI%3A102764%26theilerStage%3D%26assayType%3D%26results%3D25%26startIndex%3D0%26sort%3D%26dir%3Dasc%26tab%3Dimagestab%26theilerStageFilter%3D12%26theilerStageFilter%3D13%26theilerStageFilter%3D14%26wildtypeFilter%3Dwild%20type
ARID3B	0.8937	35.8025	5.05517e-281	3.50522e-279	2.65571	TRUE	0.700034	26.0328	1.05409e-149	1.10023e-147	0.0918521	3.40607	0.000329525	0.00742466	10	468	132	22	18	4	9	9	4	4	10	4		Posterior Hindbrain	No images	NA	NA	No images	NA	Arid3b	AT rich interactive domain 3B (BRIGHT-like)	protein coding gene	http://www.informatics.jax.org/gxd/marker/MGI:1930768?tab=imagestab#gxd=markerMgiId%3DMGI%3A102764%26theilerStage%3D%26assayType%3D%26results%3D25%26startIndex%3D0%26sort%3D%26dir%3Dasc%26tab%3Dimagestab%26theilerStageFilter%3D12%26theilerStageFilter%3D13%26theilerStageFilter%3D14%26wildtypeFilter%3Dwild%20type
PLAT	0.910589	63.0204	0	0	1.80501	TRUE	0.380016	24.0668	2.78754e-128	2.65533e-126	0.290146	18.3905	7.82427e-76	1.05887e-73	10	549	274	22	18	4	9	9	4	4	10	4	0	Posterior Hindbrain	No images	NA	High midline	No images	NA	Plat	plasminogen activator, tissue	protein coding gene	http://www.informatics.jax.org/gxd/marker/MGI:97610?tab=imagestab#gxd=markerMgiId%3DMGI%3A102764%26theilerStage%3D%26assayType%3D%26results%3D25%26startIndex%3D0%26sort%3D%26dir%3Dasc%26tab%3Dimagestab%26theilerStageFilter%3D12%26theilerStageFilter%3D13%26theilerStageFilter%3D14%26wildtypeFilter%3Dwild%20type
NTRK2	0.884942	34.1876	1.84639e-256	1.21176e-254	1.48082	TRUE	0.603189	21.4767	1.28452e-102	1.13541e-100	0.0873492	3.10415	0.000954128	0.0198756	10	778	199	26	53	4	9	9	4	4	10	4		Posterior Hindbrain	Could not determine	NA	NA	Could not determine	NA	Ntrk2	neurotrophic tyrosine kinase, receptor, type 2	protein coding gene	http://www.informatics.jax.org/gxd/marker/MGI:97384?tab=imagestab#gxd=markerMgiId%3DMGI%3A102764%26theilerStage%3D%26assayType%3D%26results%3D25%26startIndex%3D0%26sort%3D%26dir%3Dasc%26tab%3Dimagestab%26theilerStageFilter%3D12%26theilerStageFilter%3D13%26theilerStageFilter%3D14%26wildtypeFilter%3Dwild%20type
NRGN	0.900431	43.5744	0	0	1.32858	TRUE	0.468085	20.8104	1.74293e-96	1.4742e-94	0.0445558	1.97655	0.0240463	0.329512	10	809	199	26	53	4	9	9	4	4	10	4		Posterior Hindbrain	No images	NA	NA	No images	NA	Nrgn	neurogranin	protein coding gene	http://www.informatics.jax.org/gxd/marker/MGI:1927184?tab=imagestab#gxd=markerMgiId%3DMGI%3A102764%26theilerStage%3D%26assayType%3D%26results%3D25%26startIndex%3D0%26sort%3D%26dir%3Dasc%26tab%3Dimagestab%26theilerStageFilter%3D12%26theilerStageFilter%3D13%26theilerStageFilter%3D14%26wildtypeFilter%3Dwild%20type
TSHZ3	0.891901	28.3038	1.55122e-176	8.47902e-175	1.41216	TRUE	0.691982	20.3618	1.82358e-92	1.52273e-90	0.0421913	1.23942	0.107595	0.50035	10	500	60	2	28	11	11	24	4	4	10	4		Posterior Hindbrain	No images	NA	NA	No images	NA	Tshz3	teashirt zinc finger family meMB/R1er 3	protein coding gene	http://www.informatics.jax.org/gxd/marker/MGI:2442819?tab=imagestab#gxd=markerMgiId%3DMGI%3A102764%26theilerStage%3D%26assayType%3D%26results%3D25%26startIndex%3D0%26sort%3D%26dir%3Dasc%26tab%3Dimagestab%26theilerStageFilter%3D12%26theilerStageFilter%3D13%26theilerStageFilter%3D14%26wildtypeFilter%3Dwild%20type
NAPSA	0.895303	70.9644	0	0	1.2538	TRUE	0.282735	19.9345	1.02197e-88	8.2189e-87	0.0305463	2.159	0.015425	0.230881	10	783	141	14	3	11	11	24	4	4	10	4		Posterior Hindbrain	No images	NA	NA	No images	NA	Napsa	napsin A aspartic peptidase	protein coding gene	http://www.informatics.jax.org/gxd/marker/MGI:109365?tab=imagestab#gxd=markerMgiId%3DMGI%3A102764%26theilerStage%3D%26assayType%3D%26results%3D25%26startIndex%3D0%26sort%3D%26dir%3Dasc%26tab%3Dimagestab%26theilerStageFilter%3D12%26theilerStageFilter%3D13%26theilerStageFilter%3D14%26wildtypeFilter%3Dwild%20type
SLC35F1	0.873019	26.0653	4.50831e-150	2.28007e-148	1.65399	TRUE	0.695052	19.1781	2.82189e-82	2.1887e-80	0.122823	3.38234	0.00035935	0.00799492	10	242	74	2	28	11	11	24	4	4	10	4		Posterior Hindbrain	No images	NA	NA	No images	NA	Slc35f1	solute carrier family 35, meMB/R1er F1	protein coding gene	http://www.informatics.jax.org/gxd/marker/MGI:2139810?tab=imagestab#gxd=markerMgiId%3DMGI%3A102764%26theilerStage%3D%26assayType%3D%26results%3D25%26startIndex%3D0%26sort%3D%26dir%3Dasc%26tab%3Dimagestab%26theilerStageFilter%3D12%26theilerStageFilter%3D13%26theilerStageFilter%3D14%26wildtypeFilter%3Dwild%20type
TMEM35A	0.905195	33.3831	1.20467e-244	7.65024e-243	1.08265	TRUE	0.56144	18.8816	8.07693e-80	6.11945e-78	0.0322339	1.08263	0.139487	0.50035	10	508	199	26	53	4	9	9	4	4	10	4		Posterior Hindbrain	No images	NA	NA	No images	NA	Tmem35a	transmeMB/R1rane protein 35A	protein coding gene	http://www.informatics.jax.org/gxd/marker/MGI:1914814?tab=imagestab#gxd=markerMgiId%3DMGI%3A102764%26theilerStage%3D%26assayType%3D%26results%3D25%26startIndex%3D0%26sort%3D%26dir%3Dasc%26tab%3Dimagestab%26theilerStageFilter%3D12%26theilerStageFilter%3D13%26theilerStageFilter%3D14%26wildtypeFilter%3Dwild%20type
MEF2C	0.885046	31.3048	2.00841e-215	1.21639e-213	1.89636	TRUE	0.56671	18.6356	8.26165e-78	6.11767e-76	0.0793698	2.59928	0.00467096	0.0834015	10	228	74	2	28	11	11	24	4	4	10	4		Posterior Hindbrain	Could not determine	NA	NA	Could not determine	NA	Mef2c	myocyte enhancer factor 2C	protein coding gene	http://www.informatics.jax.org/gxd/marker/MGI:99458?tab=imagestab#gxd=markerMgiId%3DMGI%3A102764%26theilerStage%3D%26assayType%3D%26results%3D25%26startIndex%3D0%26sort%3D%26dir%3Dasc%26tab%3Dimagestab%26theilerStageFilter%3D12%26theilerStageFilter%3D13%26theilerStageFilter%3D14%26wildtypeFilter%3Dwild%20type
MEIS1	0.814526	30.6158	3.77022e-206	2.24191e-204	2.16374	TRUE	0.521396	18.2031	2.43657e-74	1.77085e-72	0.0745917	2.60095	0.00464826	0.0832234	10	485	242	2	28	11	11	24	4	4	10	4		Posterior Hindbrain	Posterior HB	Yes	NA	Could not determine	NA	Meis1	Meis homeobox 1	protein coding gene	http://www.informatics.jax.org/gxd/marker/MGI:104717?tab=imagestab#gxd=markerMgiId%3DMGI%3A102764%26theilerStage%3D%26assayType%3D%26results%3D25%26startIndex%3D0%26sort%3D%26dir%3Dasc%26tab%3Dimagestab%26theilerStageFilter%3D12%26theilerStageFilter%3D13%26theilerStageFilter%3D14%26wildtypeFilter%3Dwild%20type
ST8SIA4	0.834575	23.186	3.15023e-119	1.42108e-117	1.36384	TRUE	0.672243	17.2587	4.81164e-67	3.34818e-65	0.114033	2.92274	0.00173485	0.0347732	10	727	74	2	28	11	11	24	4	4	10	4		Posterior Hindbrain	Could not determine	NA	NA	Could not determine	NA	St8sia4	ST8 alpha-N-acetyl-neuraminide alpha-2,8-sialyltransferase 4	protein coding gene	http://www.informatics.jax.org/gxd/marker/MGI:106018?tab=imagestab#gxd=markerMgiId%3DMGI%3A102764%26theilerStage%3D%26assayType%3D%26results%3D25%26startIndex%3D0%26sort%3D%26dir%3Dasc%26tab%3Dimagestab%26theilerStageFilter%3D12%26theilerStageFilter%3D13%26theilerStageFilter%3D14%26wildtypeFilter%3Dwild%20type
ATP2B4	0.842364	25.879	5.74078e-148	2.87376e-146	1.27299	TRUE	0.600031	17.1577	2.75239e-66	1.90849e-64	0.144914	4.13468	1.77724e-05	0.000474487	0	782	93	36	5	1	17	17	17	0	0	4		Posterior Hindbrain	No images	NA	NA	No images	NA	Atp2b4	ATPase, Ca++ transporting, plasma meMB/R1rane 4	protein coding gene	http://www.informatics.jax.org/gxd/marker/MGI:88111?tab=imagestab#gxd=markerMgiId%3DMGI%3A102764%26theilerStage%3D%26assayType%3D%26results%3D25%26startIndex%3D0%26sort%3D%26dir%3Dasc%26tab%3Dimagestab%26theilerStageFilter%3D12%26theilerStageFilter%3D13%26theilerStageFilter%3D14%26wildtypeFilter%3Dwild%20type
NNAT	0.901667	26.673	4.8457e-157	2.49573e-155	4.25402	TRUE	0.60198	16.5623	6.52975e-62	4.31425e-60	0.123288	3.38665	0.000353756	0.00789734	10	491	52	22	18	4	9	9	4	4	10	4		Posterior Hindbrain	R3, R5 (Posterior HB)	Yes	NA	Global	NA	Nnat	neuronatin	protein coding gene	http://www.informatics.jax.org/gxd/marker/MGI:104716?tab=imagestab#gxd=markerMgiId%3DMGI%3A102764%26theilerStage%3D%26assayType%3D%26results%3D25%26startIndex%3D0%26sort%3D%26dir%3Dasc%26tab%3Dimagestab%26theilerStageFilter%3D12%26theilerStageFilter%3D13%26theilerStageFilter%3D14%26wildtypeFilter%3Dwild%20type
CAMK2N1	0.900503	26.9261	5.44132e-160	2.81728e-158	1.43829	TRUE	0.546898	15.0597	1.49047e-51	9.02702e-50	0.114331	3.14573	0.00082835	0.0174033	10	517	133	2	28	11	11	24	4	4	10	4		Posterior Hindbrain	No images	NA	NA	No images	NA	Camk2n1	calcium/calmodulin-dependent protein kinase II inhibitor 1	protein coding gene	http://www.informatics.jax.org/gxd/marker/MGI:1913509?tab=imagestab#gxd=markerMgiId%3DMGI%3A102764%26theilerStage%3D%26assayType%3D%26results%3D25%26startIndex%3D0%26sort%3D%26dir%3Dasc%26tab%3Dimagestab%26theilerStageFilter%3D12%26theilerStageFilter%3D13%26theilerStageFilter%3D14%26wildtypeFilter%3Dwild%20type
GJB3	0.865444	37.3601	8.69065e-306	6.22396e-304	1.1239	TRUE	0.340066	14.4233	1.84569e-47	1.07792e-45	0.042533	1.79051	0.0366862	0.458823	10	822	172	38	3	11	11	24	4	4	10	4		Posterior Hindbrain	Could not determine	NA	NA	Could not determine	NA	Gjb3	gap junction protein, beta 3	protein coding gene	http://www.informatics.jax.org/gxd/marker/MGI:95721?tab=imagestab#gxd=markerMgiId%3DMGI%3A102764%26theilerStage%3D%26assayType%3D%26results%3D25%26startIndex%3D0%26sort%3D%26dir%3Dasc%26tab%3Dimagestab%26theilerStageFilter%3D12%26theilerStageFilter%3D13%26theilerStageFilter%3D14%26wildtypeFilter%3Dwild%20type
RPRM	0.871324	22.7345	1.02058e-114	4.50039e-113	2.145	TRUE	0.595582	14.4092	2.26407e-47	1.31833e-45	0.148004	3.57552	0.000174767	0.00411205	4	624	9	16	4	21	21	12	12	1	4	4		Posterior Hindbrain	No images	NA	NA	No images	NA	Rprm	reprimo, TP53 dependent G2 arrest mediator candidate	protein coding gene	http://www.informatics.jax.org/gxd/marker/MGI:1915124?tab=imagestab#gxd=markerMgiId%3DMGI%3A102764%26theilerStage%3D%26assayType%3D%26results%3D25%26startIndex%3D0%26sort%3D%26dir%3Dasc%26tab%3Dimagestab%26theilerStageFilter%3D12%26theilerStageFilter%3D13%26theilerStageFilter%3D14%26wildtypeFilter%3Dwild%20type
NAB1	0.89299	27.4514	3.34533e-166	1.78384e-164	1.42228	TRUE	0.499787	14.0571	3.48412e-45	1.98747e-43	0.0404147	1.13558	0.128066	0.50035	10	824	199	26	53	4	9	9	4	4	10	4		Posterior Hindbrain	R3, R5 (Posterior HB)	Yes	NA	Midline excluded	NA	Nab1	Ngfi-A binding protein 1	protein coding gene	http://www.informatics.jax.org/gxd/marker/MGI:107564?tab=imagestab#gxd=markerMgiId%3DMGI%3A102764%26theilerStage%3D%26assayType%3D%26results%3D25%26startIndex%3D0%26sort%3D%26dir%3Dasc%26tab%3Dimagestab%26theilerStageFilter%3D12%26theilerStageFilter%3D13%26theilerStageFilter%3D14%26wildtypeFilter%3Dwild%20type
SULF1	0.876621	53.4783	0	0	2.49044	TRUE	0.247954	13.8718	4.69196e-44	2.65332e-42	0.494587	27.7116	2.528e-169	6.27935e-167	0	505	252	44	44	44	17	17	17	0	0	4	6	Posterior Hindbrain	Global	No	High midline	Could not determine	NA	Sulf1	sulfatase 1	protein coding gene	http://www.informatics.jax.org/gxd/marker/MGI:2138563?tab=imagestab#gxd=markerMgiId%3DMGI%3A102764%26theilerStage%3D%26assayType%3D%26results%3D25%26startIndex%3D0%26sort%3D%26dir%3Dasc%26tab%3Dimagestab%26theilerStageFilter%3D12%26theilerStageFilter%3D13%26theilerStageFilter%3D14%26wildtypeFilter%3Dwild%20type
ROBO2	0.851472	31.5173	2.51347e-218	1.53651e-216	1.90002	TRUE	0.398034	13.5372	4.7187e-42	2.58645e-40	0.0801338	2.72234	0.0032411	0.0603989	2	662	32	6	60	9	10	21	1	2	2	4		Posterior Hindbrain	Could not determine	NA	NA	Could not determine	NA	Robo2	roundabout guidance receptor 2	protein coding gene	http://www.informatics.jax.org/gxd/marker/MGI:1890110?tab=imagestab#gxd=markerMgiId%3DMGI%3A102764%26theilerStage%3D%26assayType%3D%26results%3D25%26startIndex%3D0%26sort%3D%26dir%3Dasc%26tab%3Dimagestab%26theilerStageFilter%3D12%26theilerStageFilter%3D13%26theilerStageFilter%3D14%26wildtypeFilter%3Dwild%20type
2700033N17RIK	0.905451	20.2013	4.7715e-91	1.80755e-89	1.32052	TRUE	0.627887	12.9747	8.50839e-39	4.42865e-37	0.071724	1.47866	0.0696162	0.50035	10	601	74	2	28	11	11	24	4	4	10	4		Posterior Hindbrain	No images	NA	NA	No images	NA	2700033N17Rik	RIKEN cDNA 2700033N17 gene	lncRNA gene	http://www.informatics.jax.org/gxd/marker/MGI:1919853?tab=imagestab#gxd=markerMgiId%3DMGI%3A102764%26theilerStage%3D%26assayType%3D%26results%3D25%26startIndex%3D0%26sort%3D%26dir%3Dasc%26tab%3Dimagestab%26theilerStageFilter%3D12%26theilerStageFilter%3D13%26theilerStageFilter%3D14%26wildtypeFilter%3Dwild%20type
PHLDA2	0.882937	49.8225	0	0	1.90747	TRUE	0.235213	11.9717	2.49868e-33	1.1702e-31	0.0332183	1.69125	0.0453949	0.50035	4	691	71	37	4	21	21	12	12	1	4	4		Posterior Hindbrain	Could not determine	NA	NA	Could not determine	NA	Phlda2	pleckstrin homology like domain, family A, meMB/R1er 2	protein coding gene	http://www.informatics.jax.org/gxd/marker/MGI:1202307?tab=imagestab#gxd=markerMgiId%3DMGI%3A102764%26theilerStage%3D%26assayType%3D%26results%3D25%26startIndex%3D0%26sort%3D%26dir%3Dasc%26tab%3Dimagestab%26theilerStageFilter%3D12%26theilerStageFilter%3D13%26theilerStageFilter%3D14%26wildtypeFilter%3Dwild%20type
COL1A2	0.855435	24.8976	3.95149e-137	1.90516e-135	1.78174	TRUE	0.423388	11.4241	1.58523e-30	7.1675e-29	0.0624049	1.68148	0.0463353	0.50035	10	619	17	14	3	11	11	24	4	4	10	4		Posterior Hindbrain	Could not determine	NA	NA	Could not determine	NA	Col1a2	collagen, type I, alpha 2	protein coding gene	http://www.informatics.jax.org/gxd/marker/MGI:88468?tab=imagestab#gxd=markerMgiId%3DMGI%3A102764%26theilerStage%3D%26assayType%3D%26results%3D25%26startIndex%3D0%26sort%3D%26dir%3Dasc%26tab%3Dimagestab%26theilerStageFilter%3D12%26theilerStageFilter%3D13%26theilerStageFilter%3D14%26wildtypeFilter%3Dwild%20type
SDK2	0.851985	16.6783	9.41993e-63	2.9959e-61	1.40913	TRUE	0.620499	11.3468	3.84586e-30	1.72694e-28	0.0343171	0.626474	0.265502	0.50035	10	439	133	2	28	11	11	24	4	4	10	4		Posterior Hindbrain	No images	NA	NA	No images	NA	Sdk2	sidekick cell adhesion molecule 2	protein coding gene	http://www.informatics.jax.org/gxd/marker/MGI:2443847?tab=imagestab#gxd=markerMgiId%3DMGI%3A102764%26theilerStage%3D%26assayType%3D%26results%3D25%26startIndex%3D0%26sort%3D%26dir%3Dasc%26tab%3Dimagestab%26theilerStageFilter%3D12%26theilerStageFilter%3D13%26theilerStageFilter%3D14%26wildtypeFilter%3Dwild%20type
LRRC7	0.865791	23.2273	1.20692e-119	5.4696e-118	1.12853	TRUE	0.455785	11.2038	1.95203e-29	8.68585e-28	0.0632071	1.5546	0.0600207	0.50035	10	768	17	14	3	11	11	24	4	4	10	4		Posterior Hindbrain	No images	NA	NA	No images	NA	Lrrc7	leucine rich repeat containing 7	protein coding gene	http://www.informatics.jax.org/gxd/marker/MGI:2676665?tab=imagestab#gxd=markerMgiId%3DMGI%3A102764%26theilerStage%3D%26assayType%3D%26results%3D25%26startIndex%3D0%26sort%3D%26dir%3Dasc%26tab%3Dimagestab%26theilerStageFilter%3D12%26theilerStageFilter%3D13%26theilerStageFilter%3D14%26wildtypeFilter%3Dwild%20type
JAK2	0.849699	16.4147	7.50779e-61	2.34222e-59	1.37578	TRUE	0.634256	11.1811	2.52212e-29	1.11719e-27	0.0389363	0.685939	0.246376	0.50035	10	392	74	2	28	11	11	24	4	4	10	4		Posterior Hindbrain	No images	NA	NA	No images	NA	Jak2	Janus kinase 2	protein coding gene	http://www.informatics.jax.org/gxd/marker/MGI:96629?tab=imagestab#gxd=markerMgiId%3DMGI%3A102764%26theilerStage%3D%26assayType%3D%26results%3D25%26startIndex%3D0%26sort%3D%26dir%3Dasc%26tab%3Dimagestab%26theilerStageFilter%3D12%26theilerStageFilter%3D13%26theilerStageFilter%3D14%26wildtypeFilter%3Dwild%20type
S100A10	0.864927	20.1248	2.23894e-90	8.41663e-89	2.06664	TRUE	0.493202	10.6105	1.33227e-26	5.49224e-25	0.0907865	1.95532	0.0252724	0.343407	4	409	72	37	4	21	21	12	12	1	4	4		Posterior Hindbrain	No images	NA	NA	No images	NA	S100a10	S100 calcium binding protein A10 (calpactin)	protein coding gene	http://www.informatics.jax.org/gxd/marker/MGI:1339468?tab=imagestab#gxd=markerMgiId%3DMGI%3A102764%26theilerStage%3D%26assayType%3D%26results%3D25%26startIndex%3D0%26sort%3D%26dir%3Dasc%26tab%3Dimagestab%26theilerStageFilter%3D12%26theilerStageFilter%3D13%26theilerStageFilter%3D14%26wildtypeFilter%3Dwild%20type
SPARC	0.873158	25.9049	2.92927e-148	1.47011e-146	2.96616	TRUE	0.385917	10.5863	1.72473e-26	7.09525e-25	0.31108	8.53708	6.88301e-18	3.58263e-16	4	669	205	102	15	32	32	12	12	1	4	4		Posterior Hindbrain	Could not determine	NA	NA	Could not determine	NA	Sparc	secreted acidic cysteine rich glycoprotein	protein coding gene	http://www.informatics.jax.org/gxd/marker/MGI:98373?tab=imagestab#gxd=markerMgiId%3DMGI%3A102764%26theilerStage%3D%26assayType%3D%26results%3D25%26startIndex%3D0%26sort%3D%26dir%3Dasc%26tab%3Dimagestab%26theilerStageFilter%3D12%26theilerStageFilter%3D13%26theilerStageFilter%3D14%26wildtypeFilter%3Dwild%20type
TNFAIP6	0.877757	21.1414	1.65467e-99	6.64e-98	1.02223	TRUE	0.470331	10.5397	2.83454e-26	1.15879e-24	0.0643706	1.4404	0.0748764	0.50035	10	405	172	38	3	11	11	24	4	4	10	4		Posterior Hindbrain	No images	NA	NA	No images	NA	Tnfaip6	tumor necrosis factor alpha induced protein 6	protein coding gene	http://www.informatics.jax.org/gxd/marker/MGI:1195266?tab=imagestab#gxd=markerMgiId%3DMGI%3A102764%26theilerStage%3D%26assayType%3D%26results%3D25%26startIndex%3D0%26sort%3D%26dir%3Dasc%26tab%3Dimagestab%26theilerStageFilter%3D12%26theilerStageFilter%3D13%26theilerStageFilter%3D14%26wildtypeFilter%3Dwild%20type
MXRA7	0.896221	17.6905	2.47973e-70	8.24742e-69	2.10576	TRUE	0.57739	10.4217	9.87354e-26	4.01968e-24	0.176379	3.18246	0.000730152	0.0153731	10	275	74	2	28	11	11	24	4	4	10	4		Posterior Hindbrain	No images	NA	NA	No images	NA	Mxra7	matrix-remodelling associated 7	protein coding gene	http://www.informatics.jax.org/gxd/marker/MGI:1914872?tab=imagestab#gxd=markerMgiId%3DMGI%3A102764%26theilerStage%3D%26assayType%3D%26results%3D25%26startIndex%3D0%26sort%3D%26dir%3Dasc%26tab%3Dimagestab%26theilerStageFilter%3D12%26theilerStageFilter%3D13%26theilerStageFilter%3D14%26wildtypeFilter%3Dwild%20type
MAB21L2	0.904112	136.371	0	0	2.66141	TRUE	0.668316	92.0043	0	0	0.381253	52.4517	0	0	5	821	24	46	12	26	26	26	2	5	5	5	1	Midbrain/R1 and Weaker Forebrain	Some FB, MB/R1	Yes	High lateral	Could not determine	NA	Mab21l2	mab-21-like 2	protein coding gene	http://www.informatics.jax.org/gxd/marker/MGI:1346022?tab=imagestab#gxd=markerMgiId%3DMGI%3A102764%26theilerStage%3D%26assayType%3D%26results%3D25%26startIndex%3D0%26sort%3D%26dir%3Dasc%26tab%3Dimagestab%26theilerStageFilter%3D12%26theilerStageFilter%3D13%26theilerStageFilter%3D14%26wildtypeFilter%3Dwild%20type
FGF8	0.879636	101.85	0	0	3.55851	TRUE	0.578449	61.7764	0	0	0.0817243	8.74817	1.08416e-18	5.94257e-17	2	852	269	28	58	23	23	23	1	2	2	5		Midbrain/R1 and Weaker Forebrain	ANR, R1	Yes	NA	Could not determine	NA	Fgf8	fibroblast growth factor 8	protein coding gene	http://www.informatics.jax.org/gxd/marker/MGI:99604?tab=imagestab#gxd=markerMgiId%3DMGI%3A102764%26theilerStage%3D%26assayType%3D%26results%3D25%26startIndex%3D0%26sort%3D%26dir%3Dasc%26tab%3Dimagestab%26theilerStageFilter%3D12%26theilerStageFilter%3D13%26theilerStageFilter%3D14%26wildtypeFilter%3Dwild%20type
ENPP2	0.897701	73.5592	0	0	2.24604	TRUE	0.694572	52.1489	0	0	0.243072	18.2277	1.556e-74	2.09133e-72	5	584	277	32	65	3	13	13	2	5	5	5	1	Midbrain/R1 and Weaker Forebrain	MB/R1	Yes	High lateral	Midline excluded	Yes	Enpp2	ectonucleotide pyrophosphatase/phosphodiesterase 2	protein coding gene	http://www.informatics.jax.org/gxd/marker/MGI:1321390?tab=imagestab#gxd=markerMgiId%3DMGI%3A102764%26theilerStage%3D%26assayType%3D%26results%3D25%26startIndex%3D0%26sort%3D%26dir%3Dasc%26tab%3Dimagestab%26theilerStageFilter%3D12%26theilerStageFilter%3D13%26theilerStageFilter%3D14%26wildtypeFilter%3Dwild%20type
TRH	0.821537	78.8582	0	0	2.87206	TRUE	0.578236	51.2897	0	0	0.215128	19.0232	5.48071e-81	7.90795e-79	5	853	277	32	65	3	13	13	2	5	5	5	1	Midbrain/R1 and Weaker Forebrain	ANR, MB/R1	Yes	High lateral	Midline excluded	Yes	Trh	thyrotropin releasing hormone	protein coding gene	http://www.informatics.jax.org/gxd/marker/MGI:98823?tab=imagestab#gxd=markerMgiId%3DMGI%3A102764%26theilerStage%3D%26assayType%3D%26results%3D25%26startIndex%3D0%26sort%3D%26dir%3Dasc%26tab%3Dimagestab%26theilerStageFilter%3D12%26theilerStageFilter%3D13%26theilerStageFilter%3D14%26wildtypeFilter%3Dwild%20type
IL17RD	0.861562	60.2984	0	0	2.29685	TRUE	0.586132	38.1178	0	0	0.138991	9.05031	7.12809e-20	4.1383e-18	2	813	79	87	21	13	8	18	18	2	2	5		Midbrain/R1 and Weaker Forebrain	ANR, R1	Yes	NA	High lateral	NA	Il17rd	interleukin 17 receptor D	protein coding gene	http://www.informatics.jax.org/gxd/marker/MGI:2159727?tab=imagestab#gxd=markerMgiId%3DMGI%3A102764%26theilerStage%3D%26assayType%3D%26results%3D25%26startIndex%3D0%26sort%3D%26dir%3Dasc%26tab%3Dimagestab%26theilerStageFilter%3D12%26theilerStageFilter%3D13%26theilerStageFilter%3D14%26wildtypeFilter%3Dwild%20type
EFNA2	0.904827	50.8239	0	0	2.83721	TRUE	0.721099	37.2819	1.61307e-304	2.61597e-302	0.364277	18.8208	2.55059e-79	3.52466e-77	5	665	24	46	12	26	26	26	2	5	5	5	1	Midbrain/R1 and Weaker Forebrain	Some FB, MB/R1	Yes	High lateral	Midline excluded	Yes	Efna2	ephrin A2	protein coding gene	http://www.informatics.jax.org/gxd/marker/MGI:102707?tab=imagestab#gxd=markerMgiId%3DMGI%3A102764%26theilerStage%3D%26assayType%3D%26results%3D25%26startIndex%3D0%26sort%3D%26dir%3Dasc%26tab%3Dimagestab%26theilerStageFilter%3D12%26theilerStageFilter%3D13%26theilerStageFilter%3D14%26wildtypeFilter%3Dwild%20type
PAX2	0.845445	54.6008	0	0	2.42026	TRUE	0.440895	26.3526	2.39514e-153	2.52687e-151	0.201504	12.0509	9.59453e-34	7.65339e-32	2	565	282	87	21	13	8	18	18	2	2	5	2	Midbrain/R1 and Weaker Forebrain	FB, MB/R1	Yes	Midline excluded	Global	No	Pax2	paired box 2	protein coding gene	http://www.informatics.jax.org/gxd/marker/MGI:97486?tab=imagestab#gxd=markerMgiId%3DMGI%3A102764%26theilerStage%3D%26assayType%3D%26results%3D25%26startIndex%3D0%26sort%3D%26dir%3Dasc%26tab%3Dimagestab%26theilerStageFilter%3D12%26theilerStageFilter%3D13%26theilerStageFilter%3D14%26wildtypeFilter%3Dwild%20type
2510009E07RIK	0.825199	37.6447	0	0	1.891	TRUE	0.556782	23.734	8.02977e-125	7.61199e-123	0.416601	17.7795	5.09841e-71	6.58198e-69	5	674	16	17	20	42	13	13	2	5	5	5	1	Midbrain/R1 and Weaker Forebrain	No images	NA	High lateral	No images	NA	2510009E07Rik	RIKEN cDNA 2510009E07 gene	protein coding gene	http://www.informatics.jax.org/gxd/marker/MGI:1919440?tab=imagestab#gxd=markerMgiId%3DMGI%3A102764%26theilerStage%3D%26assayType%3D%26results%3D25%26startIndex%3D0%26sort%3D%26dir%3Dasc%26tab%3Dimagestab%26theilerStageFilter%3D12%26theilerStageFilter%3D13%26theilerStageFilter%3D14%26wildtypeFilter%3Dwild%20type
DUSP6	0.876093	52.2109	0	0	2.21034	TRUE	0.411716	22.5792	3.47123e-113	3.15351e-111	0.366077	20.1282	2.0908e-90	3.28222e-88	1	445	97	97	33	33	33	3	3	16	1	5	0	Midbrain/R1 and Weaker Forebrain	ANR, R1	Yes	High midline	Could not determine	NA	Dusp6	dual specificity phosphatase 6	protein coding gene	http://www.informatics.jax.org/gxd/marker/MGI:1914853?tab=imagestab#gxd=markerMgiId%3DMGI%3A102764%26theilerStage%3D%26assayType%3D%26results%3D25%26startIndex%3D0%26sort%3D%26dir%3Dasc%26tab%3Dimagestab%26theilerStageFilter%3D12%26theilerStageFilter%3D13%26theilerStageFilter%3D14%26wildtypeFilter%3Dwild%20type
TRP53I11	0.884624	44.843	0	0	2.69907	TRUE	0.442287	21.1879	6.17667e-100	5.36305e-98	0.483382	23.2004	2.25768e-119	4.47499e-117	1	218	107	94	33	33	33	3	3	16	1	5	6	Midbrain/R1 and Weaker Forebrain	No images	NA	High midline	No images	NA	Trp53i11	transformation related protein 53 inducible protein 11	protein coding gene	http://www.informatics.jax.org/gxd/marker/MGI:2670995?tab=imagestab#gxd=markerMgiId%3DMGI%3A102764%26theilerStage%3D%26assayType%3D%26results%3D25%26startIndex%3D0%26sort%3D%26dir%3Dasc%26tab%3Dimagestab%26theilerStageFilter%3D12%26theilerStageFilter%3D13%26theilerStageFilter%3D14%26wildtypeFilter%3Dwild%20type
TPBG	0.890656	28.5849	5.18163e-180	2.88861e-178	2.62481	TRUE	0.680141	20.2598	1.45487e-91	1.19954e-89	0.479239	14.2729	1.61485e-46	1.53083e-44	5	621	24	46	12	26	26	26	2	5	5	5	1	Midbrain/R1 and Weaker Forebrain	Some FB, MB/R1	Yes	High lateral	Could not determine	NA	Tpbg	trophoblast glycoprotein	protein coding gene	http://www.informatics.jax.org/gxd/marker/MGI:1341264?tab=imagestab#gxd=markerMgiId%3DMGI%3A102764%26theilerStage%3D%26assayType%3D%26results%3D25%26startIndex%3D0%26sort%3D%26dir%3Dasc%26tab%3Dimagestab%26theilerStageFilter%3D12%26theilerStageFilter%3D13%26theilerStageFilter%3D14%26wildtypeFilter%3Dwild%20type
RFLNB	0.887695	31.4405	2.83341e-217	1.72671e-215	2.08831	TRUE	0.588334	19.428	2.23781e-84	1.76355e-82	0.317704	10.4697	5.95233e-26	4.04161e-24	5	743	16	17	20	42	13	13	2	5	5	5	1	Midbrain/R1 and Weaker Forebrain	Some FB, MB/R1	Yes	High lateral	Midline excluded	Yes	Rflnb	refilin B	protein coding gene	http://www.informatics.jax.org/gxd/marker/MGI:1923816?tab=imagestab#gxd=markerMgiId%3DMGI%3A102764%26theilerStage%3D%26assayType%3D%26results%3D25%26startIndex%3D0%26sort%3D%26dir%3Dasc%26tab%3Dimagestab%26theilerStageFilter%3D12%26theilerStageFilter%3D13%26theilerStageFilter%3D14%26wildtypeFilter%3Dwild%20type
ITGA6	0.813388	27.2451	9.51039e-164	5.00328e-162	2.16782	TRUE	0.622485	19.3173	1.92082e-83	1.50769e-81	0.275532	8.54626	6.3573e-18	3.3178e-16	5	388	221	17	20	42	13	13	2	5	5	5		Midbrain/R1 and Weaker Forebrain	Some FB, MB/R1	Yes	NA	Could not determine	NA	Itga6	integrin alpha 6	protein coding gene	http://www.informatics.jax.org/gxd/marker/MGI:96605?tab=imagestab#gxd=markerMgiId%3DMGI%3A102764%26theilerStage%3D%26assayType%3D%26results%3D25%26startIndex%3D0%26sort%3D%26dir%3Dasc%26tab%3Dimagestab%26theilerStageFilter%3D12%26theilerStageFilter%3D13%26theilerStageFilter%3D14%26wildtypeFilter%3Dwild%20type
FOXA2	0.936913	292.74	0	0	2.69968	TRUE	0.0660503	19.1164	9.22789e-82	7.10113e-80	0.910793	264.815	0	0	9	841	127	15	31	25	25	25	9	9	9	5	5	Midbrain/R1 and Weaker Forebrain	Global (stronger in FB, MB/R1)	No	High midline	High midline	Yes	Foxa2	forkhead box A2	protein coding gene	http://www.informatics.jax.org/gxd/marker/MGI:1347476?tab=imagestab#gxd=markerMgiId%3DMGI%3A102764%26theilerStage%3D%26assayType%3D%26results%3D25%26startIndex%3D0%26sort%3D%26dir%3Dasc%26tab%3Dimagestab%26theilerStageFilter%3D12%26theilerStageFilter%3D13%26theilerStageFilter%3D14%26wildtypeFilter%3Dwild%20type
NEUROG1	0.76922	50.108	0	0	1.39981	TRUE	0.27898	19.0904	1.51641e-81	1.16236e-79	0.249679	17.3371	1.23534e-67	1.56394e-65	12	268	95	63	63	31	31	5	5	12	12	5	1	Midbrain/R1 and Weaker Forebrain	Could not determine	NA	High lateral	Could not determine	NA	Neurog1	neurogenin 1	protein coding gene	http://www.informatics.jax.org/gxd/marker/MGI:107754?tab=imagestab#gxd=markerMgiId%3DMGI%3A102764%26theilerStage%3D%26assayType%3D%26results%3D25%26startIndex%3D0%26sort%3D%26dir%3Dasc%26tab%3Dimagestab%26theilerStageFilter%3D12%26theilerStageFilter%3D13%26theilerStageFilter%3D14%26wildtypeFilter%3Dwild%20type
LIX1	0.916971	48.8935	0	0	2.73392	TRUE	0.366572	18.0808	2.25665e-73	1.62779e-71	0.442008	21.8272	6.40399e-106	1.15289e-103	5	672	167	46	12	26	26	26	2	5	5	5	2	Midbrain/R1 and Weaker Forebrain	FB, MB/R1, HB	No	Midline excluded	Midline excluded	Yes	Lix1	liMB/R1 and CNS expressed 1	protein coding gene	http://www.informatics.jax.org/gxd/marker/MGI:1913893?tab=imagestab#gxd=markerMgiId%3DMGI%3A102764%26theilerStage%3D%26assayType%3D%26results%3D25%26startIndex%3D0%26sort%3D%26dir%3Dasc%26tab%3Dimagestab%26theilerStageFilter%3D12%26theilerStageFilter%3D13%26theilerStageFilter%3D14%26wildtypeFilter%3Dwild%20type
SERPINE2	0.898726	24.5139	5.25039e-133	2.45891e-131	2.05545	TRUE	0.677169	17.0259	2.64041e-65	1.80532e-63	0.154234	3.8751	5.32902e-05	0.00134757	2	600	21	99	21	13	8	18	18	2	2	5		Midbrain/R1 and Weaker Forebrain	No images	NA	NA	No images	NA	Serpine2	serine (or cysteine) peptidase inhibitor, clade E, meMB/R1er 2	protein coding gene	http://www.informatics.jax.org/gxd/marker/MGI:101780?tab=imagestab#gxd=markerMgiId%3DMGI%3A102764%26theilerStage%3D%26assayType%3D%26results%3D25%26startIndex%3D0%26sort%3D%26dir%3Dasc%26tab%3Dimagestab%26theilerStageFilter%3D12%26theilerStageFilter%3D13%26theilerStageFilter%3D14%26wildtypeFilter%3Dwild%20type
FLRT3	0.862241	24.6136	4.51291e-134	2.12877e-132	2.80981	TRUE	0.64441	17.0172	3.06099e-65	2.08562e-63	0.160556	4.23358	1.15e-05	0.000312555	2	668	21	99	21	13	8	18	18	2	2	5		Midbrain/R1 and Weaker Forebrain	Some FB, MB/R1	Yes	NA	High lateral	NA	Flrt3	fibronectin leucine rich transmeMB/R1rane protein 3	protein coding gene	http://www.informatics.jax.org/gxd/marker/MGI:1918686?tab=imagestab#gxd=markerMgiId%3DMGI%3A102764%26theilerStage%3D%26assayType%3D%26results%3D25%26startIndex%3D0%26sort%3D%26dir%3Dasc%26tab%3Dimagestab%26theilerStageFilter%3D12%26theilerStageFilter%3D13%26theilerStageFilter%3D14%26wildtypeFilter%3Dwild%20type
AES	0.876675	27.2618	6.01877e-164	3.18346e-162	2.12745	TRUE	0.583845	16.812	9.97154e-64	6.70108e-62	0.302148	8.70062	1.65038e-18	8.97103e-17	1	585	208	53	33	33	33	3	3	16	1	5		Midbrain/R1 and Weaker Forebrain	Could not determine	NA	NA	Could not determine	NA	Tle5	TLE family meMB/R1er 5, transcriptional modulator	protein coding gene	http://www.informatics.jax.org/gxd/marker/MGI:95806?tab=imagestab#gxd=markerMgiId%3DMGI%3A95806%26theilerStage%3D%26assayType%3D%26results%3D25%26startIndex%3D0%26sort%3D%26dir%3Dasc%26tab%3Dimagestab%26theilerStageFilter%3D12%26theilerStageFilter%3D13%26theilerStageFilter%3D14%26wildtypeFilter%3Dwild%20type
IFITM1	0.841037	34.8965	4.19744e-267	2.80158e-265	3.15803	TRUE	0.394058	15.2136	1.43756e-52	8.76063e-51	0.332458	12.8407	4.847e-38	4.20852e-36	1	680	97	97	33	33	33	3	3	16	1	5	4	Midbrain/R1 and Weaker Forebrain	FB, some MB/R1	No	High midline	High midline	Yes	Ifitm1	interferon induced transmeMB/R1rane protein 1	protein coding gene	http://www.informatics.jax.org/gxd/marker/MGI:1915963?tab=imagestab#gxd=markerMgiId%3DMGI%3A102764%26theilerStage%3D%26assayType%3D%26results%3D25%26startIndex%3D0%26sort%3D%26dir%3Dasc%26tab%3Dimagestab%26theilerStageFilter%3D12%26theilerStageFilter%3D13%26theilerStageFilter%3D14%26wildtypeFilter%3Dwild%20type
SPRY1	0.860514	24.6702	1.11689e-134	5.29391e-133	2.12694	TRUE	0.560622	15.0542	1.61935e-51	9.7774e-50	0.128128	3.44155	0.0002892	0.00655308	2	558	79	87	21	13	8	18	18	2	2	5		Midbrain/R1 and Weaker Forebrain	ANR, MB/R1	Yes	NA	Could not determine	NA	Spry1	sprouty RTK signaling antagonist 1	protein coding gene	http://www.informatics.jax.org/gxd/marker/MGI:1345139?tab=imagestab#gxd=markerMgiId%3DMGI%3A102764%26theilerStage%3D%26assayType%3D%26results%3D25%26startIndex%3D0%26sort%3D%26dir%3Dasc%26tab%3Dimagestab%26theilerStageFilter%3D12%26theilerStageFilter%3D13%26theilerStageFilter%3D14%26wildtypeFilter%3Dwild%20type
RBFOX3	0.798011	21.1839	6.72738e-100	2.71071e-98	1.50105	TRUE	0.566672	14.0996	1.90879e-45	1.09202e-43	0.232116	5.77115	3.93655e-09	1.41478e-07	5	523	213	32	65	3	13	13	2	5	5	5		Midbrain/R1 and Weaker Forebrain	No images	NA	NA	No images	NA	Rbfox3	RNA binding protein, fox-1 homolog (C. elegans) 3	protein coding gene	http://www.informatics.jax.org/gxd/marker/MGI:106368?tab=imagestab#gxd=markerMgiId%3DMGI%3A102764%26theilerStage%3D%26assayType%3D%26results%3D25%26startIndex%3D0%26sort%3D%26dir%3Dasc%26tab%3Dimagestab%26theilerStageFilter%3D12%26theilerStageFilter%3D13%26theilerStageFilter%3D14%26wildtypeFilter%3Dwild%20type
WNT5A	0.809669	22.7045	2.02283e-114	8.89999e-113	1.95779	TRUE	0.526352	13.6819	6.51669e-43	3.61235e-41	0.318135	8.26382	7.05391e-17	3.51317e-15	12	263	206	31	64	5	5	5	5	12	12	5		Midbrain/R1 and Weaker Forebrain	Some FB, MB/R1	Yes	NA	Could not determine	NA	Wnt5a	wingless-type MMTV integration site family, meMB/R1er 5A	protein coding gene	http://www.informatics.jax.org/gxd/marker/MGI:98958?tab=imagestab#gxd=markerMgiId%3DMGI%3A102764%26theilerStage%3D%26assayType%3D%26results%3D25%26startIndex%3D0%26sort%3D%26dir%3Dasc%26tab%3Dimagestab%26theilerStageFilter%3D12%26theilerStageFilter%3D13%26theilerStageFilter%3D14%26wildtypeFilter%3Dwild%20type
ETV5	0.805815	25.3224	9.04182e-142	4.41362e-140	1.65374	TRUE	0.462669	13.5326	5.01708e-42	2.74235e-40	0.0963338	2.82398	0.00237159	0.045989	2	760	79	87	21	13	8	18	18	2	2	5		Midbrain/R1 and Weaker Forebrain	ANR, MB/R1	Yes	NA	Could not determine	NA	Etv5	ets variant 5	protein coding gene	http://www.informatics.jax.org/gxd/marker/MGI:1096867?tab=imagestab#gxd=markerMgiId%3DMGI%3A102764%26theilerStage%3D%26assayType%3D%26results%3D25%26startIndex%3D0%26sort%3D%26dir%3Dasc%26tab%3Dimagestab%26theilerStageFilter%3D12%26theilerStageFilter%3D13%26theilerStageFilter%3D14%26wildtypeFilter%3Dwild%20type
SLCO3A1	0.862211	20.2369	2.31779e-91	8.79729e-90	1.58805	TRUE	0.587766	12.6713	4.26687e-37	2.16914e-35	0.244956	5.28396	6.32088e-08	2.09165e-06	2	400	21	99	21	13	8	18	18	2	2	5		Midbrain/R1 and Weaker Forebrain	No images	NA	NA	No images	NA	Slco3a1	solute carrier organic anion transporter family, meMB/R1er 3a1	protein coding gene	http://www.informatics.jax.org/gxd/marker/MGI:1351867?tab=imagestab#gxd=markerMgiId%3DMGI%3A102764%26theilerStage%3D%26assayType%3D%26results%3D25%26startIndex%3D0%26sort%3D%26dir%3Dasc%26tab%3Dimagestab%26theilerStageFilter%3D12%26theilerStageFilter%3D13%26theilerStageFilter%3D14%26wildtypeFilter%3Dwild%20type
CXXC5	0.862556	19.5311	2.98806e-85	1.09598e-83	2.1412	TRUE	0.598548	12.65	5.59365e-37	2.82897e-35	0.364345	7.70026	6.78927e-15	3.16451e-13	11	553	237	8	36	36	2	11	11	11	11	5		Midbrain/R1 and Weaker Forebrain	No images	NA	NA	No images	NA	Cxxc5	CXXC finger 5	protein coding gene	http://www.informatics.jax.org/gxd/marker/MGI:1914643?tab=imagestab#gxd=markerMgiId%3DMGI%3A102764%26theilerStage%3D%26assayType%3D%26results%3D25%26startIndex%3D0%26sort%3D%26dir%3Dasc%26tab%3Dimagestab%26theilerStageFilter%3D12%26theilerStageFilter%3D13%26theilerStageFilter%3D14%26wildtypeFilter%3Dwild%20type
KCNA5	0.841631	22.2131	1.28404e-109	5.4895e-108	1.20334	TRUE	0.508122	12.4793	4.8426e-36	2.40573e-34	0.516163	12.7173	2.37048e-37	2.02243e-35	5	854	91	54	54	3	13	13	2	5	5	5	1	Midbrain/R1 and Weaker Forebrain	No images	NA	High lateral	No images	NA	Kcna5	potassium voltage-gated channel, shaker-related subfamily, meMB/R1er 5	protein coding gene	http://www.informatics.jax.org/gxd/marker/MGI:96662?tab=imagestab#gxd=markerMgiId%3DMGI%3A102764%26theilerStage%3D%26assayType%3D%26results%3D25%26startIndex%3D0%26sort%3D%26dir%3Dasc%26tab%3Dimagestab%26theilerStageFilter%3D12%26theilerStageFilter%3D13%26theilerStageFilter%3D14%26wildtypeFilter%3Dwild%20type
WSCD1	0.877296	25.9943	2.87358e-149	1.44585e-147	1.97958	TRUE	0.455012	12.4772	4.97382e-36	2.46468e-34	0.530588	14.5507	2.889e-48	2.93735e-46	5	766	101	54	54	3	13	13	2	5	5	5	2	Midbrain/R1 and Weaker Forebrain	No images	NA	Midline excluded	No images	NA	Wscd1	WSC domain containing 1	protein coding gene	http://www.informatics.jax.org/gxd/marker/MGI:2448493?tab=imagestab#gxd=markerMgiId%3DMGI%3A102764%26theilerStage%3D%26assayType%3D%26results%3D25%26startIndex%3D0%26sort%3D%26dir%3Dasc%26tab%3Dimagestab%26theilerStageFilter%3D12%26theilerStageFilter%3D13%26theilerStageFilter%3D14%26wildtypeFilter%3Dwild%20type
LARGE2	0.8746	20.1601	1.09709e-90	4.14801e-89	1.76755	TRUE	0.579916	12.4471	7.24687e-36	3.573e-34	0.392613	8.41971	1.88714e-17	9.71953e-16	5	737	70	32	65	3	13	13	2	5	5	5		Midbrain/R1 and Weaker Forebrain	No images	NA	NA	No images	NA	Large2	LARGE xylosyl- and glucuronyltransferase 2	protein coding gene	http://www.informatics.jax.org/gxd/marker/MGI:2443769?tab=imagestab#gxd=markerMgiId%3DMGI%3A102764%26theilerStage%3D%26assayType%3D%26results%3D25%26startIndex%3D0%26sort%3D%26dir%3Dasc%26tab%3Dimagestab%26theilerStageFilter%3D12%26theilerStageFilter%3D13%26theilerStageFilter%3D14%26wildtypeFilter%3Dwild%20type
PAM	0.785544	20.075	6.10805e-90	2.29175e-88	2.19635	TRUE	0.493582	11.6652	9.60063e-32	4.44323e-30	0.173388	4.09864	2.07792e-05	0.000551015	2	574	21	99	21	13	8	18	18	2	2	5		Midbrain/R1 and Weaker Forebrain	Could not determine	NA	NA	Could not determine	NA	Pam	peptidylglycine alpha-amidating monooxygenase	protein coding gene	http://www.informatics.jax.org/gxd/marker/MGI:97475?tab=imagestab#gxd=markerMgiId%3DMGI%3A102764%26theilerStage%3D%26assayType%3D%26results%3D25%26startIndex%3D0%26sort%3D%26dir%3Dasc%26tab%3Dimagestab%26theilerStageFilter%3D12%26theilerStageFilter%3D13%26theilerStageFilter%3D14%26wildtypeFilter%3Dwild%20type
NRP1	0.823681	19.2752	4.33886e-83	1.55652e-81	1.6625	TRUE	0.530076	11.5241	4.98682e-31	2.27045e-29	0.201823	4.38947	5.68137e-06	0.00016018	2	255	14	99	21	13	8	18	18	2	2	5		Midbrain/R1 and Weaker Forebrain	Could not determine	NA	NA	Could not determine	NA	Nrp1	neuropilin 1	protein coding gene	http://www.informatics.jax.org/gxd/marker/MGI:106206?tab=imagestab#gxd=markerMgiId%3DMGI%3A102764%26theilerStage%3D%26assayType%3D%26results%3D25%26startIndex%3D0%26sort%3D%26dir%3Dasc%26tab%3Dimagestab%26theilerStageFilter%3D12%26theilerStageFilter%3D13%26theilerStageFilter%3D14%26wildtypeFilter%3Dwild%20type
ABCG5	0.884209	18.9904	1.02335e-80	3.62476e-79	1.1539	TRUE	0.569324	11.2438	1.242e-29	5.55166e-28	0.492927	9.73768	1.04129e-22	6.5702e-21	5	754	138	54	54	3	13	13	2	5	5	5		Midbrain/R1 and Weaker Forebrain	No images	NA	NA	No images	NA	Abcg5	ATP binding cassette subfamily G meMB/R1er 5	protein coding gene	http://www.informatics.jax.org/gxd/marker/MGI:1351659?tab=imagestab#gxd=markerMgiId%3DMGI%3A102764%26theilerStage%3D%26assayType%3D%26results%3D25%26startIndex%3D0%26sort%3D%26dir%3Dasc%26tab%3Dimagestab%26theilerStageFilter%3D12%26theilerStageFilter%3D13%26theilerStageFilter%3D14%26wildtypeFilter%3Dwild%20type
LRTM1	0.79682	17.7758	5.43799e-71	1.81479e-69	1.16945	TRUE	0.537705	11.0969	6.49057e-29	2.83032e-27	0.337133	6.95346	1.78214e-12	7.60236e-11	12	175	206	31	64	5	5	5	5	12	12	5		Midbrain/R1 and Weaker Forebrain	No images	NA	NA	No images	NA	Lrtm1	leucine-rich repeats and transmeMB/R1rane domains 1	protein coding gene	http://www.informatics.jax.org/gxd/marker/MGI:2442106?tab=imagestab#gxd=markerMgiId%3DMGI%3A102764%26theilerStage%3D%26assayType%3D%26results%3D25%26startIndex%3D0%26sort%3D%26dir%3Dasc%26tab%3Dimagestab%26theilerStageFilter%3D12%26theilerStageFilter%3D13%26theilerStageFilter%3D14%26wildtypeFilter%3Dwild%20type
ZFHX3	0.793084	16.0963	1.35329e-58	4.14933e-57	2.2943	TRUE	0.577998	10.9119	5.05798e-28	2.16709e-26	0.352954	6.65979	1.37105e-11	5.66404e-10	5	204	221	17	20	42	13	13	2	5	5	5		Midbrain/R1 and Weaker Forebrain	Could not determine	NA	NA	Could not determine	NA	Zfhx3	zinc finger homeobox 3	protein coding gene	http://www.informatics.jax.org/gxd/marker/MGI:99948?tab=imagestab#gxd=markerMgiId%3DMGI%3A102764%26theilerStage%3D%26assayType%3D%26results%3D25%26startIndex%3D0%26sort%3D%26dir%3Dasc%26tab%3Dimagestab%26theilerStageFilter%3D12%26theilerStageFilter%3D13%26theilerStageFilter%3D14%26wildtypeFilter%3Dwild%20type
TSPAN18	0.86253	16.2837	6.44693e-60	1.99855e-58	1.63434	TRUE	0.622202	10.8845	6.83469e-28	2.91559e-26	0.331302	5.79841	3.34732e-09	1.20966e-07	5	586	70	32	65	3	13	13	2	5	5	5		Midbrain/R1 and Weaker Forebrain	No images	NA	NA	No images	NA	Tspan18	tetraspanin 18	protein coding gene	http://www.informatics.jax.org/gxd/marker/MGI:1917186?tab=imagestab#gxd=markerMgiId%3DMGI%3A102764%26theilerStage%3D%26assayType%3D%26results%3D25%26startIndex%3D0%26sort%3D%26dir%3Dasc%26tab%3Dimagestab%26theilerStageFilter%3D12%26theilerStageFilter%3D13%26theilerStageFilter%3D14%26wildtypeFilter%3Dwild%20type
RAB3B	0.848344	13.9858	9.51072e-45	2.52542e-43	1.30411	TRUE	0.715357	10.6876	5.81575e-27	2.41274e-25	0.257519	3.85069	5.88932e-05	0.00148162	5	372	213	32	65	3	13	13	2	5	5	5		Midbrain/R1 and Weaker Forebrain	No images	NA	NA	No images	NA	Rab3b	RAB3B, meMB/R1er RAS oncogene family	protein coding gene	http://www.informatics.jax.org/gxd/marker/MGI:1917158?tab=imagestab#gxd=markerMgiId%3DMGI%3A102764%26theilerStage%3D%26assayType%3D%26results%3D25%26startIndex%3D0%26sort%3D%26dir%3Dasc%26tab%3Dimagestab%26theilerStageFilter%3D12%26theilerStageFilter%3D13%26theilerStageFilter%3D14%26wildtypeFilter%3Dwild%20type
GSC2	0.847992	19.3937	4.35959e-84	1.59011e-82	1.23766	TRUE	0.494107	10.486	5.01064e-26	2.04415e-24	0.334503	7.08903	6.75258e-13	2.97098e-11	12	373	180	31	64	5	5	5	5	12	12	5		Midbrain/R1 and Weaker Forebrain	No images	NA	NA	No images	NA	Gsc2	goosecoid homebox 2	protein coding gene	http://www.informatics.jax.org/gxd/marker/MGI:892006?tab=imagestab#gxd=markerMgiId%3DMGI%3A102764%26theilerStage%3D%26assayType%3D%26results%3D25%26startIndex%3D0%26sort%3D%26dir%3Dasc%26tab%3Dimagestab%26theilerStageFilter%3D12%26theilerStageFilter%3D13%26theilerStageFilter%3D14%26wildtypeFilter%3Dwild%20type
TRPS1	0.825517	16.619	2.53787e-62	8.04534e-61	1.53054	TRUE	0.548823	10.1319	1.99466e-24	7.84395e-23	0.332866	6.15085	3.85341e-10	1.47686e-08	5	795	70	32	65	3	13	13	2	5	5	5		Midbrain/R1 and Weaker Forebrain	No images	NA	NA	No images	NA	Trps1	transcriptional repressor GATA binding 1	protein coding gene	http://www.informatics.jax.org/gxd/marker/MGI:1927616?tab=imagestab#gxd=markerMgiId%3DMGI%3A102764%26theilerStage%3D%26assayType%3D%26results%3D25%26startIndex%3D0%26sort%3D%26dir%3Dasc%26tab%3Dimagestab%26theilerStageFilter%3D12%26theilerStageFilter%3D13%26theilerStageFilter%3D14%26wildtypeFilter%3Dwild%20type
HSPB8	0.830419	17.8152	2.69133e-71	9.01228e-70	1.20591	TRUE	0.485579	10.0581	4.22962e-24	1.65334e-22	0.533031	11.0643	9.3471e-29	6.79326e-27	5	395	91	54	54	3	13	13	2	5	5	5	1	Midbrain/R1 and Weaker Forebrain	No images	NA	High lateral	No images	NA	Hspb8	heat shock protein 8	protein coding gene	http://www.informatics.jax.org/gxd/marker/MGI:2135756?tab=imagestab#gxd=markerMgiId%3DMGI%3A102764%26theilerStage%3D%26assayType%3D%26results%3D25%26startIndex%3D0%26sort%3D%26dir%3Dasc%26tab%3Dimagestab%26theilerStageFilter%3D12%26theilerStageFilter%3D13%26theilerStageFilter%3D14%26wildtypeFilter%3Dwild%20type
FST	0.950028	304.814	0	0	4.42926	TRUE	0.793762	237.052	0	0	0.30899	92.017	0	0	0	483	241	0	7	15	15	2	13	0	0	6	3	Hindbrain and Weaker R1	Posterior HB	Yes	NA	Midline excluded	NA	Fst	follistatin	protein coding gene	http://www.informatics.jax.org/gxd/marker/MGI:95586?tab=imagestab#gxd=markerMgiId%3DMGI%3A102764%26theilerStage%3D%26assayType%3D%26results%3D25%26startIndex%3D0%26sort%3D%26dir%3Dasc%26tab%3Dimagestab%26theilerStageFilter%3D12%26theilerStageFilter%3D13%26theilerStageFilter%3D14%26wildtypeFilter%3Dwild%20type
CRABP1	0.944979	216.327	0	0	5.67886	TRUE	0.864376	184.682	0	0	0.144778	30.8999	5.98675e-210	1.70258e-207	7	461	230	13	0	22	22	22	0	7	7	6	2	Hindbrain and Weaker R1	Posterior HB	Yes	Midline excluded	Midline excluded	Yes	Crabp1	cellular retinoic acid binding protein I	protein coding gene	http://www.informatics.jax.org/gxd/marker/MGI:88490?tab=imagestab#gxd=markerMgiId%3DMGI%3A102764%26theilerStage%3D%26assayType%3D%26results%3D25%26startIndex%3D0%26sort%3D%26dir%3Dasc%26tab%3Dimagestab%26theilerStageFilter%3D12%26theilerStageFilter%3D13%26theilerStageFilter%3D14%26wildtypeFilter%3Dwild%20type
VGLL3	0.91726	277.532	0	0	3.33742	TRUE	0.571861	159.986	0	0	0.365093	101.812	0	0	0	820	13	0	7	15	15	2	13	0	0	6	3	Hindbrain and Weaker R1	HB	Yes	NA	Could not determine	NA	Vgll3	vestigial like family meMB/R1er 3	protein coding gene	http://www.informatics.jax.org/gxd/marker/MGI:1920819?tab=imagestab#gxd=markerMgiId%3DMGI%3A102764%26theilerStage%3D%26assayType%3D%26results%3D25%26startIndex%3D0%26sort%3D%26dir%3Dasc%26tab%3Dimagestab%26theilerStageFilter%3D12%26theilerStageFilter%3D13%26theilerStageFilter%3D14%26wildtypeFilter%3Dwild%20type
MSX3	0.923058	128.675	0	0	2.68967	TRUE	0.737562	98.4402	0	0	0.135466	18.0235	6.36911e-73	8.38799e-71	0	534	160	70	29	29	29	2	13	0	0	6	2	Hindbrain and Weaker R1	HB	Yes	Midline excluded	High lateral	Yes	Msx3	msh homeobox 3	protein coding gene	http://www.informatics.jax.org/gxd/marker/MGI:106587?tab=imagestab#gxd=markerMgiId%3DMGI%3A102764%26theilerStage%3D%26assayType%3D%26results%3D25%26startIndex%3D0%26sort%3D%26dir%3Dasc%26tab%3Dimagestab%26theilerStageFilter%3D12%26theilerStageFilter%3D13%26theilerStageFilter%3D14%26wildtypeFilter%3Dwild%20type
GDF10	0.915661	87.4534	0	0	1.99678	TRUE	0.692639	61.6442	0	0	0.33016	29.3155	3.28908e-189	8.60555e-187	0	705	13	0	7	15	15	2	13	0	0	6	3	Hindbrain and Weaker R1	No images	NA	NA	No images	NA	Gdf10	growth differentiation factor 10	protein coding gene	http://www.informatics.jax.org/gxd/marker/MGI:95684?tab=imagestab#gxd=markerMgiId%3DMGI%3A102764%26theilerStage%3D%26assayType%3D%26results%3D25%26startIndex%3D0%26sort%3D%26dir%3Dasc%26tab%3Dimagestab%26theilerStageFilter%3D12%26theilerStageFilter%3D13%26theilerStageFilter%3D14%26wildtypeFilter%3Dwild%20type
OPCML	0.900774	83.1614	0	0	2.38971	TRUE	0.659067	56.887	0	0	0.221789	19.0907	1.50949e-81	2.19412e-79	0	437	65	9	7	15	15	2	13	0	0	6	0	Hindbrain and Weaker R1	No images	NA	High midline	No images	NA	Opcml	opioid binding protein/cell adhesion molecule-like	protein coding gene	http://www.informatics.jax.org/gxd/marker/MGI:97397?tab=imagestab#gxd=markerMgiId%3DMGI%3A102764%26theilerStage%3D%26assayType%3D%26results%3D25%26startIndex%3D0%26sort%3D%26dir%3Dasc%26tab%3Dimagestab%26theilerStageFilter%3D12%26theilerStageFilter%3D13%26theilerStageFilter%3D14%26wildtypeFilter%3Dwild%20type
MAPK10	0.868954	64.6721	0	0	1.73484	TRUE	0.575992	39.9702	0	0	0.301871	20.8559	6.73484e-97	1.11057e-94	0	638	13	0	7	15	15	2	13	0	0	6	3	Hindbrain and Weaker R1	No images	NA	NA	No images	NA	Mapk10	mitogen-activated protein kinase 10	protein coding gene	http://www.informatics.jax.org/gxd/marker/MGI:1346863?tab=imagestab#gxd=markerMgiId%3DMGI%3A102764%26theilerStage%3D%26assayType%3D%26results%3D25%26startIndex%3D0%26sort%3D%26dir%3Dasc%26tab%3Dimagestab%26theilerStageFilter%3D12%26theilerStageFilter%3D13%26theilerStageFilter%3D14%26wildtypeFilter%3Dwild%20type
OLIG3	0.910329	53.3786	0	0	1.74863	TRUE	0.685373	38.3765	0	0	0.139764	7.78871	3.38473e-15	1.60045e-13	0	667	160	70	29	29	29	2	13	0	0	6		Hindbrain and Weaker R1	No images	NA	NA	No images	NA	Olig3	oligodendrocyte transcription factor 3	protein coding gene	http://www.informatics.jax.org/gxd/marker/MGI:2149955?tab=imagestab#gxd=markerMgiId%3DMGI%3A102764%26theilerStage%3D%26assayType%3D%26results%3D25%26startIndex%3D0%26sort%3D%26dir%3Dasc%26tab%3Dimagestab%26theilerStageFilter%3D12%26theilerStageFilter%3D13%26theilerStageFilter%3D14%26wildtypeFilter%3Dwild%20type
THBS1	0.828978	60.5795	0	0	2.36636	TRUE	0.562668	38.0979	0	0	0.329249	22.2458	6.19592e-110	1.14701e-107	0	630	82	21	19	10	7	15	15	15	0	6	3	Hindbrain and Weaker R1	No images	NA	NA	No images	NA	Thbs1	throMB/R1ospondin 1	protein coding gene	http://www.informatics.jax.org/gxd/marker/MGI:98737?tab=imagestab#gxd=markerMgiId%3DMGI%3A102764%26theilerStage%3D%26assayType%3D%26results%3D25%26startIndex%3D0%26sort%3D%26dir%3Dasc%26tab%3Dimagestab%26theilerStageFilter%3D12%26theilerStageFilter%3D13%26theilerStageFilter%3D14%26wildtypeFilter%3Dwild%20type
SPARCL1	0.914825	64.6523	0	0	1.67068	TRUE	0.572611	37.6876	0	0	0.321348	21.1756	8.01021e-100	1.37881e-97	0	577	65	9	7	15	15	2	13	0	0	6	0	Hindbrain and Weaker R1	No images	NA	High midline	No images	NA	Sparcl1	SPARC-like 1	protein coding gene	http://www.informatics.jax.org/gxd/marker/MGI:108110?tab=imagestab#gxd=markerMgiId%3DMGI%3A102764%26theilerStage%3D%26assayType%3D%26results%3D25%26startIndex%3D0%26sort%3D%26dir%3Dasc%26tab%3Dimagestab%26theilerStageFilter%3D12%26theilerStageFilter%3D13%26theilerStageFilter%3D14%26wildtypeFilter%3Dwild%20type
STMN2	0.875842	56.7252	0	0	3.86583	TRUE	0.582735	34.9861	1.83089e-268	2.6613e-266	0.405352	24.2923	1.18209e-130	2.44169e-128	0	459	192	111	19	10	7	15	15	15	0	6	3	Hindbrain and Weaker R1	No images	NA	NA	No images	NA	Stmn2	stathmin-like 2	protein coding gene	http://www.informatics.jax.org/gxd/marker/MGI:98241?tab=imagestab#gxd=markerMgiId%3DMGI%3A102764%26theilerStage%3D%26assayType%3D%26results%3D25%26startIndex%3D0%26sort%3D%26dir%3Dasc%26tab%3Dimagestab%26theilerStageFilter%3D12%26theilerStageFilter%3D13%26theilerStageFilter%3D14%26wildtypeFilter%3Dwild%20type
FZD7	0.836784	45.0369	0	0	2.17318	TRUE	0.658794	33.0294	1.53861e-239	2.08221e-237	0.290037	14.5006	6.00836e-48	6.07743e-46	0	616	296	111	19	10	7	15	15	15	0	6	4	Hindbrain and Weaker R1	HB	Yes	High midline	Could not determine	NA	Fzd7	frizzled class receptor 7	protein coding gene	http://www.informatics.jax.org/gxd/marker/MGI:108570?tab=imagestab#gxd=markerMgiId%3DMGI%3A102764%26theilerStage%3D%26assayType%3D%26results%3D25%26startIndex%3D0%26sort%3D%26dir%3Dasc%26tab%3Dimagestab%26theilerStageFilter%3D12%26theilerStageFilter%3D13%26theilerStageFilter%3D14%26wildtypeFilter%3Dwild%20type
SLC44A5	0.901505	42.5893	0	0	1.32611	TRUE	0.700088	31.1602	1.84435e-213	2.36546e-211	0.251736	11.1561	3.34201e-29	2.47473e-27	0	694	13	0	7	15	15	2	13	0	0	6	2	Hindbrain and Weaker R1	No images	NA	Midline excluded	No images	NA	Slc44a5	solute carrier family 44, meMB/R1er 5	protein coding gene	http://www.informatics.jax.org/gxd/marker/MGI:3035141?tab=imagestab#gxd=markerMgiId%3DMGI%3A102764%26theilerStage%3D%26assayType%3D%26results%3D25%26startIndex%3D0%26sort%3D%26dir%3Dasc%26tab%3Dimagestab%26theilerStageFilter%3D12%26theilerStageFilter%3D13%26theilerStageFilter%3D14%26wildtypeFilter%3Dwild%20type
LGR4	0.845276	47.4713	0	0	2.04239	TRUE	0.586515	30.6984	2.98864e-207	3.75936e-205	0.379124	19.8092	1.24007e-87	1.90109e-85	0	645	296	111	19	10	7	15	15	15	0	6	4	Hindbrain and Weaker R1	No images	NA	High midline	No images	NA	Lgr4	leucine-rich repeat-containing G protein-coupled receptor 4	protein coding gene	http://www.informatics.jax.org/gxd/marker/MGI:1891468?tab=imagestab#gxd=markerMgiId%3DMGI%3A102764%26theilerStage%3D%26assayType%3D%26results%3D25%26startIndex%3D0%26sort%3D%26dir%3Dasc%26tab%3Dimagestab%26theilerStageFilter%3D12%26theilerStageFilter%3D13%26theilerStageFilter%3D14%26wildtypeFilter%3Dwild%20type
CYP26C1	0.890445	38.9294	0	0	1.05472	TRUE	0.671076	26.9862	1.07309e-160	1.17639e-158	0.286037	11.4594	1.05496e-30	8.0238e-29	0	525	47	24	49	1	17	17	17	0	0	6	3	Hindbrain and Weaker R1	R2, R4 (Posterior HB)	Yes	NA	Midline excluded	NA	Cyp26c1	cytochrome P450, family 26, subfamily c, polypeptide 1	protein coding gene	http://www.informatics.jax.org/gxd/marker/MGI:2679699?tab=imagestab#gxd=markerMgiId%3DMGI%3A102764%26theilerStage%3D%26assayType%3D%26results%3D25%26startIndex%3D0%26sort%3D%26dir%3Dasc%26tab%3Dimagestab%26theilerStageFilter%3D12%26theilerStageFilter%3D13%26theilerStageFilter%3D14%26wildtypeFilter%3Dwild%20type
NRIP1	0.879453	29.7854	3.0207e-195	1.7537e-193	2.9734	TRUE	0.785814	25.0054	2.66968e-138	2.64581e-136	0.203685	6.46149	5.18401e-11	2.08454e-09	0	399	129	9	7	15	15	2	13	0	0	6		Hindbrain and Weaker R1	No images	NA	NA	No images	NA	Nrip1	nuclear receptor interacting protein 1	protein coding gene	http://www.informatics.jax.org/gxd/marker/MGI:1315213?tab=imagestab#gxd=markerMgiId%3DMGI%3A102764%26theilerStage%3D%26assayType%3D%26results%3D25%26startIndex%3D0%26sort%3D%26dir%3Dasc%26tab%3Dimagestab%26theilerStageFilter%3D12%26theilerStageFilter%3D13%26theilerStageFilter%3D14%26wildtypeFilter%3Dwild%20type
SOX1	0.869611	33.538	6.72744e-247	4.28612e-245	2.70657	TRUE	0.685856	24.785	6.50393e-136	6.34958e-134	0.399075	14.4166	2.0344e-47	1.99605e-45	13	441	220	73	6	28	6	6	6	13	13	6	2	Hindbrain and Weaker R1	Global	No	Midline excluded	Midline excluded	Yes	Sox1	SRY (sex determining region Y)-box 1	protein coding gene	http://www.informatics.jax.org/gxd/marker/MGI:98357?tab=imagestab#gxd=markerMgiId%3DMGI%3A102764%26theilerStage%3D%26assayType%3D%26results%3D25%26startIndex%3D0%26sort%3D%26dir%3Dasc%26tab%3Dimagestab%26theilerStageFilter%3D12%26theilerStageFilter%3D13%26theilerStageFilter%3D14%26wildtypeFilter%3Dwild%20type
CYP26A1	0.892023	41.4383	0	0	1.51974	TRUE	0.5436	23.2501	7.08962e-120	6.62474e-118	0.339536	14.4591	1.09859e-47	1.0943e-45	0	415	47	24	49	1	17	17	17	0	0	6	4	Hindbrain and Weaker R1	Posterior HB	Yes	High midline	Could not determine	NA	Cyp26a1	cytochrome P450, family 26, subfamily a, polypeptide 1	protein coding gene	http://www.informatics.jax.org/gxd/marker/MGI:1096359?tab=imagestab#gxd=markerMgiId%3DMGI%3A102764%26theilerStage%3D%26assayType%3D%26results%3D25%26startIndex%3D0%26sort%3D%26dir%3Dasc%26tab%3Dimagestab%26theilerStageFilter%3D12%26theilerStageFilter%3D13%26theilerStageFilter%3D14%26wildtypeFilter%3Dwild%20type
EXOC6	0.906968	32.9621	1.41814e-238	8.94798e-237	1.56277	TRUE	0.67469	22.846	8.01611e-116	7.38498e-114	0.266003	8.96451	1.55826e-19	8.8889e-18	0	819	47	24	49	1	17	17	17	0	0	6		Hindbrain and Weaker R1	No images	NA	NA	No images	NA	Exoc6	exocyst complex component 6	protein coding gene	http://www.informatics.jax.org/gxd/marker/MGI:1351611?tab=imagestab#gxd=markerMgiId%3DMGI%3A102764%26theilerStage%3D%26assayType%3D%26results%3D25%26startIndex%3D0%26sort%3D%26dir%3Dasc%26tab%3Dimagestab%26theilerStageFilter%3D12%26theilerStageFilter%3D13%26theilerStageFilter%3D14%26wildtypeFilter%3Dwild%20type
ZIC3	0.839505	36.5627	5.59547e-293	3.94964e-291	2.11733	TRUE	0.541406	22.1761	2.92349e-109	2.64367e-107	0.312856	12.7966	8.56044e-38	7.40007e-36	0	449	29	70	29	29	29	2	13	0	0	6	2	Hindbrain and Weaker R1	HB	Yes	Midline excluded	Midline excluded	Yes	Zic3	zinc finger protein of the cerebellum 3	protein coding gene	http://www.informatics.jax.org/gxd/marker/MGI:106676?tab=imagestab#gxd=markerMgiId%3DMGI%3A102764%26theilerStage%3D%26assayType%3D%26results%3D25%26startIndex%3D0%26sort%3D%26dir%3Dasc%26tab%3Dimagestab%26theilerStageFilter%3D12%26theilerStageFilter%3D13%26theilerStageFilter%3D14%26wildtypeFilter%3Dwild%20type
NEBL	0.840064	27.1911	4.14107e-163	2.16694e-161	1.59637	TRUE	0.669991	20.2074	4.21474e-91	3.4605e-89	0.246087	7.42056	5.83151e-14	2.66741e-12	13	545	76	73	6	28	6	6	6	13	13	6		Hindbrain and Weaker R1	No images	NA	NA	No images	NA	Nebl	nebulette	protein coding gene	http://www.informatics.jax.org/gxd/marker/MGI:1921353?tab=imagestab#gxd=markerMgiId%3DMGI%3A102764%26theilerStage%3D%26assayType%3D%26results%3D25%26startIndex%3D0%26sort%3D%26dir%3Dasc%26tab%3Dimagestab%26theilerStageFilter%3D12%26theilerStageFilter%3D13%26theilerStageFilter%3D14%26wildtypeFilter%3Dwild%20type
ME3	0.916157	28.3256	8.35839e-177	4.58147e-175	1.43926	TRUE	0.701013	20.0139	2.08526e-89	1.69087e-87	0.369973	10.5465	2.63538e-26	1.80189e-24	0	631	109	21	19	10	7	15	15	15	0	6	3	Hindbrain and Weaker R1	No images	NA	NA	No images	NA	Me3	malic enzyme 3, NADP(+)-dependent, mitochondrial	protein coding gene	http://www.informatics.jax.org/gxd/marker/MGI:1916679?tab=imagestab#gxd=markerMgiId%3DMGI%3A102764%26theilerStage%3D%26assayType%3D%26results%3D25%26startIndex%3D0%26sort%3D%26dir%3Dasc%26tab%3Dimagestab%26theilerStageFilter%3D12%26theilerStageFilter%3D13%26theilerStageFilter%3D14%26wildtypeFilter%3Dwild%20type
EBF1	0.862511	38.7074	0	0	2.13498	TRUE	0.47839	19.8152	1.10132e-87	8.82086e-86	0.311007	12.8565	3.95244e-38	3.44705e-36	0	628	19	24	49	1	17	17	17	0	0	6	0	Hindbrain and Weaker R1	No images	NA	High midline	No images	NA	Ebf1	early B cell factor 1	protein coding gene	http://www.informatics.jax.org/gxd/marker/MGI:95275?tab=imagestab#gxd=markerMgiId%3DMGI%3A102764%26theilerStage%3D%26assayType%3D%26results%3D25%26startIndex%3D0%26sort%3D%26dir%3Dasc%26tab%3Dimagestab%26theilerStageFilter%3D12%26theilerStageFilter%3D13%26theilerStageFilter%3D14%26wildtypeFilter%3Dwild%20type
PRSS23	0.885747	28.0371	2.87013e-173	1.55582e-171	2.14551	TRUE	0.667232	19.5084	4.65643e-85	3.6844e-83	0.422067	12.3295	3.14325e-35	2.58075e-33	0	657	109	21	19	10	7	15	15	15	0	6	3	Hindbrain and Weaker R1	No images	NA	NA	No images	NA	Prss23	protease, serine 23	protein coding gene	http://www.informatics.jax.org/gxd/marker/MGI:1923703?tab=imagestab#gxd=markerMgiId%3DMGI%3A102764%26theilerStage%3D%26assayType%3D%26results%3D25%26startIndex%3D0%26sort%3D%26dir%3Dasc%26tab%3Dimagestab%26theilerStageFilter%3D12%26theilerStageFilter%3D13%26theilerStageFilter%3D14%26wildtypeFilter%3Dwild%20type
ID2	0.882533	41.4522	0	0	3.77287	TRUE	0.416771	18.5351	5.38326e-77	3.97127e-75	0.401013	17.854	1.3457e-71	1.74878e-69	0	647	29	70	29	29	29	2	13	0	0	6	2	Hindbrain and Weaker R1	No images	NA	Midline excluded	No images	NA	Id2	inhibitor of DNA binding 2	protein coding gene	http://www.informatics.jax.org/gxd/marker/MGI:96397?tab=imagestab#gxd=markerMgiId%3DMGI%3A102764%26theilerStage%3D%26assayType%3D%26results%3D25%26startIndex%3D0%26sort%3D%26dir%3Dasc%26tab%3Dimagestab%26theilerStageFilter%3D12%26theilerStageFilter%3D13%26theilerStageFilter%3D14%26wildtypeFilter%3Dwild%20type
PHOX2B	0.820847	30.7185	1.61134e-207	9.64004e-206	1.3115	TRUE	0.504146	18.2721	6.89725e-75	5.05017e-73	0.245114	8.86858	3.70421e-19	2.07087e-17	0	562	27	10	5	1	17	17	17	0	0	6		Hindbrain and Weaker R1	HB	Yes	NA	Global	NA	Phox2b	paired-like homeobox 2b	protein coding gene	http://www.informatics.jax.org/gxd/marker/MGI:1100882?tab=imagestab#gxd=markerMgiId%3DMGI%3A102764%26theilerStage%3D%26assayType%3D%26results%3D25%26startIndex%3D0%26sort%3D%26dir%3Dasc%26tab%3Dimagestab%26theilerStageFilter%3D12%26theilerStageFilter%3D13%26theilerStageFilter%3D14%26wildtypeFilter%3Dwild%20type
NCALD	0.912064	33.7102	2.04668e-249	1.31678e-247	1.88463	TRUE	0.49706	17.1192	5.33725e-66	3.67484e-64	0.438681	15.0599	1.4866e-51	1.55168e-49	0	464	78	44	44	44	17	17	17	0	0	6	5	Hindbrain and Weaker R1	No images	NA	High midline	No images	NA	Ncald	neurocalcin delta	protein coding gene	http://www.informatics.jax.org/gxd/marker/MGI:1196326?tab=imagestab#gxd=markerMgiId%3DMGI%3A102764%26theilerStage%3D%26assayType%3D%26results%3D25%26startIndex%3D0%26sort%3D%26dir%3Dasc%26tab%3Dimagestab%26theilerStageFilter%3D12%26theilerStageFilter%3D13%26theilerStageFilter%3D14%26wildtypeFilter%3Dwild%20type
RLN1	0.894319	26.1426	5.97516e-151	3.04547e-149	1.37809	TRUE	0.62428	16.7829	1.62678e-63	1.0895e-61	0.267174	7.15955	4.04709e-13	1.80082e-11	0	423	84	24	49	1	17	17	17	0	0	6		Hindbrain and Weaker R1	No images	NA	NA	No images	NA	Rln1	relaxin 1	protein coding gene	http://www.informatics.jax.org/gxd/marker/MGI:97931?tab=imagestab#gxd=markerMgiId%3DMGI%3A102764%26theilerStage%3D%26assayType%3D%26results%3D25%26startIndex%3D0%26sort%3D%26dir%3Dasc%26tab%3Dimagestab%26theilerStageFilter%3D12%26theilerStageFilter%3D13%26theilerStageFilter%3D14%26wildtypeFilter%3Dwild%20type
TMEM2	0.837244	27.4669	2.18152e-166	1.16643e-164	2.24418	TRUE	0.544719	16.7177	4.86652e-63	3.23715e-61	0.275763	8.44162	1.56483e-17	8.08072e-16	0	772	78	44	44	44	17	17	17	0	0	6		Hindbrain and Weaker R1	Global	No	NA	Could not determine	NA	Cemip2	cell migration inducing hyaluronidase 2	protein coding gene	http://www.informatics.jax.org/gxd/marker/MGI:1890373?tab=imagestab#gxd=markerMgiId%3DMGI%3A1890373%26theilerStage%3D%26assayType%3D%26results%3D25%26startIndex%3D0%26sort%3D%26dir%3Dasc%26tab%3Dimagestab%26theilerStageFilter%3D12%26theilerStageFilter%3D13%26theilerStageFilter%3D14%26wildtypeFilter%3Dwild%20type
PEAK1	0.792998	19.9904	3.33672e-89	1.24955e-87	1.81686	TRUE	0.697856	16.4271	6.11583e-61	4.00036e-59	0.160585	3.77427	8.02381e-05	0.00198802	0	355	69	36	5	1	17	17	17	0	0	6		Hindbrain and Weaker R1	No images	NA	NA	No images	NA	Peak1	pseudopodium-enriched atypical kinase 1	protein coding gene	http://www.informatics.jax.org/gxd/marker/MGI:2442366?tab=imagestab#gxd=markerMgiId%3DMGI%3A102764%26theilerStage%3D%26assayType%3D%26results%3D25%26startIndex%3D0%26sort%3D%26dir%3Dasc%26tab%3Dimagestab%26theilerStageFilter%3D12%26theilerStageFilter%3D13%26theilerStageFilter%3D14%26wildtypeFilter%3Dwild%20type
RHPN2	0.809315	22.2963	2.0063e-110	8.61481e-109	1.62103	TRUE	0.625678	16.1206	9.1416e-59	5.90084e-57	0.308149	7.9172	1.21455e-15	5.84145e-14	0	347	47	24	49	1	17	17	17	0	0	6		Hindbrain and Weaker R1	No images	NA	NA	No images	NA	Rhpn2	rhophilin, Rho GTPase binding protein 2	protein coding gene	http://www.informatics.jax.org/gxd/marker/MGI:1289234?tab=imagestab#gxd=markerMgiId%3DMGI%3A102764%26theilerStage%3D%26assayType%3D%26results%3D25%26startIndex%3D0%26sort%3D%26dir%3Dasc%26tab%3Dimagestab%26theilerStageFilter%3D12%26theilerStageFilter%3D13%26theilerStageFilter%3D14%26wildtypeFilter%3Dwild%20type
NCAM1	0.837624	20.9613	7.40433e-98	2.93525e-96	1.93534	TRUE	0.627519	14.6233	9.97491e-49	5.89571e-47	0.24998	5.81983	2.94531e-09	1.07029e-07	0	426	78	44	44	44	17	17	17	0	0	6		Hindbrain and Weaker R1	Weak HB	Yes	NA	Could not determine	NA	Ncam1	neural cell adhesion molecule 1	protein coding gene	http://www.informatics.jax.org/gxd/marker/MGI:97281?tab=imagestab#gxd=markerMgiId%3DMGI%3A102764%26theilerStage%3D%26assayType%3D%26results%3D25%26startIndex%3D0%26sort%3D%26dir%3Dasc%26tab%3Dimagestab%26theilerStageFilter%3D12%26theilerStageFilter%3D13%26theilerStageFilter%3D14%26wildtypeFilter%3Dwild%20type
THSD4	0.84427	16.5734	5.43007e-62	1.71034e-60	1.15381	TRUE	0.770348	14.2006	4.54046e-46	2.61283e-44	0.119999	2.20614	0.0136872	0.209504	0	296	260	36	5	1	17	17	17	0	0	6		Hindbrain and Weaker R1	No images	NA	NA	No images	NA	Thsd4	throMB/R1ospondin, type I, domain containing 4	protein coding gene	http://www.informatics.jax.org/gxd/marker/MGI:2672033?tab=imagestab#gxd=markerMgiId%3DMGI%3A102764%26theilerStage%3D%26assayType%3D%26results%3D25%26startIndex%3D0%26sort%3D%26dir%3Dasc%26tab%3Dimagestab%26theilerStageFilter%3D12%26theilerStageFilter%3D13%26theilerStageFilter%3D14%26wildtypeFilter%3Dwild%20type
FHL1	0.891558	20.2991	6.55286e-92	2.51146e-90	2.63527	TRUE	0.6152	13.1973	4.54725e-40	2.42475e-38	0.475377	10.179	1.23089e-24	8.13258e-23	0	176	82	21	19	10	7	15	15	15	0	6	3	Hindbrain and Weaker R1	No images	NA	NA	No images	NA	Fhl1	four and a half LIM domains 1	protein coding gene	http://www.informatics.jax.org/gxd/marker/MGI:1298387?tab=imagestab#gxd=markerMgiId%3DMGI%3A102764%26theilerStage%3D%26assayType%3D%26results%3D25%26startIndex%3D0%26sort%3D%26dir%3Dasc%26tab%3Dimagestab%26theilerStageFilter%3D12%26theilerStageFilter%3D13%26theilerStageFilter%3D14%26wildtypeFilter%3Dwild%20type
LPAR4	0.808592	22.4905	2.56825e-112	1.11745e-110	2.77681	TRUE	0.480709	12.4221	9.91895e-36	4.86599e-34	0.451628	11.6555	1.07528e-31	8.24228e-30	0	447	66	110	10	43	7	15	15	15	0	6	2	Hindbrain and Weaker R1	Global	No	Midline excluded	Midline excluded	Yes	Lpar4	lysophosphatidic acid receptor 4	protein coding gene	http://www.informatics.jax.org/gxd/marker/MGI:1925384?tab=imagestab#gxd=markerMgiId%3DMGI%3A102764%26theilerStage%3D%26assayType%3D%26results%3D25%26startIndex%3D0%26sort%3D%26dir%3Dasc%26tab%3Dimagestab%26theilerStageFilter%3D12%26theilerStageFilter%3D13%26theilerStageFilter%3D14%26wildtypeFilter%3Dwild%20type
NREP	0.850882	29.3115	3.7057e-189	2.10165e-187	2.57045	TRUE	0.388578	12.407	1.19742e-35	5.85959e-34	0.492386	15.7209	5.44034e-56	5.93088e-54	0	507	130	44	44	44	17	17	17	0	0	6	5	Hindbrain and Weaker R1	No images	NA	High midline	No images	NA	Nrep	neuronal regeneration related protein	protein coding gene	http://www.informatics.jax.org/gxd/marker/MGI:99444?tab=imagestab#gxd=markerMgiId%3DMGI%3A102764%26theilerStage%3D%26assayType%3D%26results%3D25%26startIndex%3D0%26sort%3D%26dir%3Dasc%26tab%3Dimagestab%26theilerStageFilter%3D12%26theilerStageFilter%3D13%26theilerStageFilter%3D14%26wildtypeFilter%3Dwild%20type
ZFP710	0.725658	15.8608	5.92091e-57	1.79299e-55	2.08846	TRUE	0.600954	12.277	6.02017e-35	2.88131e-33	0.242903	4.95441	3.62743e-07	1.1389e-05	0	759	69	36	5	1	17	17	17	0	0	6		Hindbrain and Weaker R1	No images	NA	NA	No images	NA	Zfp710	zinc finger protein 710	protein coding gene	http://www.informatics.jax.org/gxd/marker/MGI:1921747?tab=imagestab#gxd=markerMgiId%3DMGI%3A102764%26theilerStage%3D%26assayType%3D%26results%3D25%26startIndex%3D0%26sort%3D%26dir%3Dasc%26tab%3Dimagestab%26theilerStageFilter%3D12%26theilerStageFilter%3D13%26theilerStageFilter%3D14%26wildtypeFilter%3Dwild%20type
PRMT8	0.901887	14.6214	1.026e-48	2.83167e-47	1.27051	TRUE	0.720098	10.9156	4.85467e-28	2.08453e-26	0.359986	5.44242	2.62808e-08	8.96885e-07	0	223	27	10	5	1	17	17	17	0	0	6		Hindbrain and Weaker R1	No images	NA	NA	No images	NA	Prmt8	protein arginine N-methyltransferase 8	protein coding gene	http://www.informatics.jax.org/gxd/marker/MGI:3043083?tab=imagestab#gxd=markerMgiId%3DMGI%3A102764%26theilerStage%3D%26assayType%3D%26results%3D25%26startIndex%3D0%26sort%3D%26dir%3Dasc%26tab%3Dimagestab%26theilerStageFilter%3D12%26theilerStageFilter%3D13%26theilerStageFilter%3D14%26wildtypeFilter%3Dwild%20type
SNX30	0.837432	13.2291	2.97993e-40	7.35536e-39	1.78797	TRUE	0.73315	10.9076	5.30199e-28	2.26669e-26	0.204031	3.02962	0.0012243	0.0250777	0	106	69	36	5	1	17	17	17	0	0	6		Hindbrain and Weaker R1	No images	NA	NA	No images	NA	Snx30	sorting nexin family meMB/R1er 30	protein coding gene	http://www.informatics.jax.org/gxd/marker/MGI:2443882?tab=imagestab#gxd=markerMgiId%3DMGI%3A102764%26theilerStage%3D%26assayType%3D%26results%3D25%26startIndex%3D0%26sort%3D%26dir%3Dasc%26tab%3Dimagestab%26theilerStageFilter%3D12%26theilerStageFilter%3D13%26theilerStageFilter%3D14%26wildtypeFilter%3Dwild%20type
SIX3	0.964283	386.807	0	0	4.2658	TRUE	0.869151	325.09	0	0	0.0592118	22.1498	5.23831e-109	9.51771e-107	6	851	157	7	34	34	16	16	16	6	6	7	3	Forebrain	FB	Yes	NA	Global	NA	Six3	sine oculis-related homeobox 3	protein coding gene	http://www.informatics.jax.org/gxd/marker/MGI:102764?tab=imagestab#gxd=markerMgiId%3DMGI%3A102764%26theilerStage%3D%26assayType%3D%26results%3D25%26startIndex%3D0%26sort%3D%26dir%3Dasc%26tab%3Dimagestab%26theilerStageFilter%3D12%26theilerStageFilter%3D13%26theilerStageFilter%3D14%26wildtypeFilter%3Dwild%20type
LHX2	0.961646	354.632	0	0	3.30299	TRUE	0.849616	291.025	0	0	0.0484716	16.5975	3.63044e-62	4.31759e-60	6	857	157	7	34	34	16	16	16	6	6	7	3	Forebrain	FB	Yes	NA	Midline excluded	NA	Lhx2	LIM homeobox protein 2	protein coding gene	http://www.informatics.jax.org/gxd/marker/MGI:96785?tab=imagestab#gxd=markerMgiId%3DMGI%3A102764%26theilerStage%3D%26assayType%3D%26results%3D25%26startIndex%3D0%26sort%3D%26dir%3Dasc%26tab%3Dimagestab%26theilerStageFilter%3D12%26theilerStageFilter%3D13%26theilerStageFilter%3D14%26wildtypeFilter%3Dwild%20type
RAX	0.955413	313.737	0	0	3.01931	TRUE	0.831372	253.12	0	0	0.0675686	20.5622	2.99384e-94	4.77627e-92	6	559	157	7	34	34	16	16	16	6	6	7	3	Forebrain	FB	Yes	NA	Global	NA	Rax	retina and anterior neural fold homeobox	protein coding gene	http://www.informatics.jax.org/gxd/marker/MGI:109632?tab=imagestab#gxd=markerMgiId%3DMGI%3A102764%26theilerStage%3D%26assayType%3D%26results%3D25%26startIndex%3D0%26sort%3D%26dir%3Dasc%26tab%3Dimagestab%26theilerStageFilter%3D12%26theilerStageFilter%3D13%26theilerStageFilter%3D14%26wildtypeFilter%3Dwild%20type
SHISA2	0.958943	244.415	0	0	2.81308	TRUE	0.870005	206.205	0	0	0.0342045	8.10649	2.60513e-16	1.27801e-14	6	2	157	7	34	34	16	16	16	6	6	7		Forebrain	FB	Yes	NA	Global	NA	Shisa2	shisa family meMB/R1er 2	protein coding gene	http://www.informatics.jax.org/gxd/marker/MGI:2444716?tab=imagestab#gxd=markerMgiId%3DMGI%3A102764%26theilerStage%3D%26assayType%3D%26results%3D25%26startIndex%3D0%26sort%3D%26dir%3Dasc%26tab%3Dimagestab%26theilerStageFilter%3D12%26theilerStageFilter%3D13%26theilerStageFilter%3D14%26wildtypeFilter%3Dwild%20type
HESX1	0.946888	271.58	0	0	2.89551	TRUE	0.722747	193.455	0	0	0.121594	32.5619	7.10116e-233	2.28436e-230	6	861	251	7	34	34	16	16	16	6	6	7	3	Forebrain	FB	Yes	NA	Global	NA	Hesx1	homeobox gene expressed in ES cells	protein coding gene	http://www.informatics.jax.org/gxd/marker/MGI:96071?tab=imagestab#gxd=markerMgiId%3DMGI%3A102764%26theilerStage%3D%26assayType%3D%26results%3D25%26startIndex%3D0%26sort%3D%26dir%3Dasc%26tab%3Dimagestab%26theilerStageFilter%3D12%26theilerStageFilter%3D13%26theilerStageFilter%3D14%26wildtypeFilter%3Dwild%20type
FEZF1	0.95421	204.834	0	0	2.31424	TRUE	0.8899	178.267	0	0	0.0460361	9.2233	1.44049e-20	8.59171e-19	6	2	157	7	34	34	16	16	16	6	6	7		Forebrain	No images	NA	NA	No images	NA	Fezf1	Fez family zinc finger 1	protein coding gene	http://www.informatics.jax.org/gxd/marker/MGI:1920441?tab=imagestab#gxd=markerMgiId%3DMGI%3A102764%26theilerStage%3D%26assayType%3D%26results%3D25%26startIndex%3D0%26sort%3D%26dir%3Dasc%26tab%3Dimagestab%26theilerStageFilter%3D12%26theilerStageFilter%3D13%26theilerStageFilter%3D14%26wildtypeFilter%3Dwild%20type
HOPX	0.961136	177.999	0	0	2.32307	TRUE	0.846065	145.731	0	0	0.0504739	8.69269	1.76974e-18	9.56683e-17	6	528	157	7	34	34	16	16	16	6	6	7		Forebrain	FB	Yes	NA	Could not determine	NA	Hopx	HOP homeobox	protein coding gene	http://www.informatics.jax.org/gxd/marker/MGI:1916782?tab=imagestab#gxd=markerMgiId%3DMGI%3A102764%26theilerStage%3D%26assayType%3D%26results%3D25%26startIndex%3D0%26sort%3D%26dir%3Dasc%26tab%3Dimagestab%26theilerStageFilter%3D12%26theilerStageFilter%3D13%26theilerStageFilter%3D14%26wildtypeFilter%3Dwild%20type
ALDH1A2	0.934059	155.171	0	0	2.26409	TRUE	0.732545	112.046	0	0	0.0585872	8.95147	1.75389e-19	9.947e-18	6	433	210	76	1	20	20	20	20	6	6	7		Forebrain	FB	Yes	NA	Midline excluded	NA	Aldh1a2	aldehyde dehydrogenase family 1, subfamily A2	protein coding gene	http://www.informatics.jax.org/gxd/marker/MGI:107928?tab=imagestab#gxd=markerMgiId%3DMGI%3A102764%26theilerStage%3D%26assayType%3D%26results%3D25%26startIndex%3D0%26sort%3D%26dir%3Dasc%26tab%3Dimagestab%26theilerStageFilter%3D12%26theilerStageFilter%3D13%26theilerStageFilter%3D14%26wildtypeFilter%3Dwild%20type
FBN2	0.938386	91.5235	0	0	2.38848	TRUE	0.809845	73.5736	0	0	0.0856732	7.78676	3.4376e-15	1.62154e-13	6	673	31	75	1	20	20	20	20	6	6	7		Forebrain	No images	NA	NA	No images	NA	Fbn2	fibrillin 2	protein coding gene	http://www.informatics.jax.org/gxd/marker/MGI:95490?tab=imagestab#gxd=markerMgiId%3DMGI%3A102764%26theilerStage%3D%26assayType%3D%26results%3D25%26startIndex%3D0%26sort%3D%26dir%3Dasc%26tab%3Dimagestab%26theilerStageFilter%3D12%26theilerStageFilter%3D13%26theilerStageFilter%3D14%26wildtypeFilter%3Dwild%20type
ERMN	0.928628	70.8167	0	0	1.63473	TRUE	0.814412	57.8868	0	0	0.084633	6.02203	8.61208e-10	3.25616e-08	6	725	31	75	1	20	20	20	20	6	6	7		Forebrain	No images	NA	NA	No images	NA	Ermn	ermin, ERM-like protein	protein coding gene	http://www.informatics.jax.org/gxd/marker/MGI:1925017?tab=imagestab#gxd=markerMgiId%3DMGI%3A102764%26theilerStage%3D%26assayType%3D%26results%3D25%26startIndex%3D0%26sort%3D%26dir%3Dasc%26tab%3Dimagestab%26theilerStageFilter%3D12%26theilerStageFilter%3D13%26theilerStageFilter%3D14%26wildtypeFilter%3Dwild%20type
SEMA6A	0.906394	52.8636	0	0	2.08579	TRUE	0.680098	36.8898	3.36561e-298	5.36938e-296	0.1302	7.07206	7.63242e-13	3.32824e-11	3	481	215	92	17	35	1	7	7	3	3	7		Forebrain	No images	NA	NA	No images	NA	Sema6a	sema domain, transmeMB/R1rane domain (TM), and cytoplasmic domain, (semaphorin) 6A	protein coding gene	http://www.informatics.jax.org/gxd/marker/MGI:1203727?tab=imagestab#gxd=markerMgiId%3DMGI%3A102764%26theilerStage%3D%26assayType%3D%26results%3D25%26startIndex%3D0%26sort%3D%26dir%3Dasc%26tab%3Dimagestab%26theilerStageFilter%3D12%26theilerStageFilter%3D13%26theilerStageFilter%3D14%26wildtypeFilter%3Dwild%20type
GLDC	0.922924	39.1426	0	0	2.07759	TRUE	0.821935	32.5064	4.32924e-232	5.74004e-230	0.0693522	2.74239	0.00304971	0.0572126	14	541	42	39	8	6	28	0	14	14	14	7		Forebrain	No images	NA	NA	No images	NA	Gldc	glycine decarboxylase	protein coding gene	http://www.informatics.jax.org/gxd/marker/MGI:1341155?tab=imagestab#gxd=markerMgiId%3DMGI%3A102764%26theilerStage%3D%26assayType%3D%26results%3D25%26startIndex%3D0%26sort%3D%26dir%3Dasc%26tab%3Dimagestab%26theilerStageFilter%3D12%26theilerStageFilter%3D13%26theilerStageFilter%3D14%26wildtypeFilter%3Dwild%20type
TAC1	0.907889	45.655	0	0	1.48404	TRUE	0.683283	31.8579	5.11231e-223	6.68792e-221	0.0620314	2.88859	0.00193489	0.038352	14	590	42	39	8	6	28	0	14	14	14	7		Forebrain	No images	NA	NA	No images	NA	Tac1	tachykinin 1	protein coding gene	http://www.informatics.jax.org/gxd/marker/MGI:98474?tab=imagestab#gxd=markerMgiId%3DMGI%3A102764%26theilerStage%3D%26assayType%3D%26results%3D25%26startIndex%3D0%26sort%3D%26dir%3Dasc%26tab%3Dimagestab%26theilerStageFilter%3D12%26theilerStageFilter%3D13%26theilerStageFilter%3D14%26wildtypeFilter%3Dwild%20type
NKX2-1	0.89416	152.798	0	0	2.35484	TRUE	0.194825	31.4858	6.80123e-218	8.83845e-216	0.542478	88.2879	0	0	9	834	123	61	61	14	14	14	9	9	9	7	3	Forebrain	FB	Yes	NA	High midline	NA	Nkx2-1	NK2 homeobox 1	protein coding gene	http://www.informatics.jax.org/gxd/marker/MGI:108067?tab=imagestab#gxd=markerMgiId%3DMGI%3A102764%26theilerStage%3D%26assayType%3D%26results%3D25%26startIndex%3D0%26sort%3D%26dir%3Dasc%26tab%3Dimagestab%26theilerStageFilter%3D12%26theilerStageFilter%3D13%26theilerStageFilter%3D14%26wildtypeFilter%3Dwild%20type
ACER2	0.910391	46.6883	0	0	2.15383	TRUE	0.629747	30.6661	8.05872e-207	1.00086e-204	0.142636	6.95186	1.80248e-12	7.67245e-11	14	685	224	39	8	6	28	0	14	14	14	7		Forebrain	No images	NA	NA	No images	NA	Acer2	alkaline ceramidase 2	protein coding gene	http://www.informatics.jax.org/gxd/marker/MGI:1920932?tab=imagestab#gxd=markerMgiId%3DMGI%3A102764%26theilerStage%3D%26assayType%3D%26results%3D25%26startIndex%3D0%26sort%3D%26dir%3Dasc%26tab%3Dimagestab%26theilerStageFilter%3D12%26theilerStageFilter%3D13%26theilerStageFilter%3D14%26wildtypeFilter%3Dwild%20type
LPAR1	0.911564	40.0035	0	0	2.18394	TRUE	0.678563	27.7502	8.65374e-170	9.64843e-168	0.103572	4.23508	1.14236e-05	0.000310908	6	807	77	76	1	20	20	20	20	6	6	7		Forebrain	FB, MB/R1	No	NA	Midline excluded	NA	Lpar1	lysophosphatidic acid receptor 1	protein coding gene	http://www.informatics.jax.org/gxd/marker/MGI:108429?tab=imagestab#gxd=markerMgiId%3DMGI%3A102764%26theilerStage%3D%26assayType%3D%26results%3D25%26startIndex%3D0%26sort%3D%26dir%3Dasc%26tab%3Dimagestab%26theilerStageFilter%3D12%26theilerStageFilter%3D13%26theilerStageFilter%3D14%26wildtypeFilter%3Dwild%20type
PEX5L	0.898395	38.5299	0	0	1.49498	TRUE	0.685396	27.5096	6.73513e-167	7.46686e-165	0.192289	7.7286	5.43662e-15	2.54613e-13	4	742	80	55	55	8	0	4	19	1	4	7		Forebrain	No images	NA	NA	No images	NA	Pex5l	peroxisomal biogenesis factor 5-like	protein coding gene	http://www.informatics.jax.org/gxd/marker/MGI:1916672?tab=imagestab#gxd=markerMgiId%3DMGI%3A102764%26theilerStage%3D%26assayType%3D%26results%3D25%26startIndex%3D0%26sort%3D%26dir%3Dasc%26tab%3Dimagestab%26theilerStageFilter%3D12%26theilerStageFilter%3D13%26theilerStageFilter%3D14%26wildtypeFilter%3Dwild%20type
MEG3	0.895625	30.1186	1.38142e-199	8.14043e-198	3.89665	TRUE	0.841568	26.5611	9.55889e-156	1.02499e-153	0.0292765	0.924062	0.177727	0.50035	3	704	85	65	17	35	1	7	7	3	3	7		Forebrain	Could not determine	NA	NA	Could not determine	NA	Meg3	maternally expressed 3	lncRNA gene	http://www.informatics.jax.org/gxd/marker/MGI:1202886?tab=imagestab#gxd=markerMgiId%3DMGI%3A102764%26theilerStage%3D%26assayType%3D%26results%3D25%26startIndex%3D0%26sort%3D%26dir%3Dasc%26tab%3Dimagestab%26theilerStageFilter%3D12%26theilerStageFilter%3D13%26theilerStageFilter%3D14%26wildtypeFilter%3Dwild%20type
SOX6	0.818252	31.7326	2.76249e-221	1.70467e-219	1.49691	TRUE	0.734969	26.5215	2.73802e-155	2.92001e-153	0.0300431	1.08507	0.138945	0.50035	14	513	259	116	25	12	12	0	14	14	14	7		Forebrain	Could not determine	NA	NA	Could not determine	NA	Sox6	SRY (sex determining region Y)-box 6	protein coding gene	http://www.informatics.jax.org/gxd/marker/MGI:98368?tab=imagestab#gxd=markerMgiId%3DMGI%3A102764%26theilerStage%3D%26assayType%3D%26results%3D25%26startIndex%3D0%26sort%3D%26dir%3Dasc%26tab%3Dimagestab%26theilerStageFilter%3D12%26theilerStageFilter%3D13%26theilerStageFilter%3D14%26wildtypeFilter%3Dwild%20type
EDN1	0.872654	39.8967	0	0	2.02043	TRUE	0.580624	24.4738	1.40537e-132	1.36523e-130	0.0230391	0.97201	0.165523	0.50035	14	652	189	116	25	12	12	0	14	14	14	7		Forebrain	FB	Yes	NA	Could not determine	NA	Edn1	endothelin 1	protein coding gene	http://www.informatics.jax.org/gxd/marker/MGI:95283?tab=imagestab#gxd=markerMgiId%3DMGI%3A102764%26theilerStage%3D%26assayType%3D%26results%3D25%26startIndex%3D0%26sort%3D%26dir%3Dasc%26tab%3Dimagestab%26theilerStageFilter%3D12%26theilerStageFilter%3D13%26theilerStageFilter%3D14%26wildtypeFilter%3Dwild%20type
THSD7A	0.882132	49.1915	0	0	1.64555	TRUE	0.349897	18.1679	4.63621e-74	3.35706e-72	0.552835	28.843	3.10105e-183	8.00684e-181	4	492	147	84	35	8	0	4	19	1	4	7	5	Forebrain	No images	NA	High midline	No images	NA	Thsd7a	throMB/R1ospondin, type I, domain containing 7A	protein coding gene	http://www.informatics.jax.org/gxd/marker/MGI:2685683?tab=imagestab#gxd=markerMgiId%3DMGI%3A102764%26theilerStage%3D%26assayType%3D%26results%3D25%26startIndex%3D0%26sort%3D%26dir%3Dasc%26tab%3Dimagestab%26theilerStageFilter%3D12%26theilerStageFilter%3D13%26theilerStageFilter%3D14%26wildtypeFilter%3Dwild%20type
CALB2	0.907512	28.3574	3.39007e-177	1.8634e-175	1.49524	TRUE	0.566927	16.3924	1.0839e-60	7.06623e-59	0.150065	4.34395	6.99711e-06	0.000195034	14	708	137	118	52	6	28	0	14	14	14	7		Forebrain	No images	NA	NA	No images	NA	Calb2	calbindin 2	protein coding gene	http://www.informatics.jax.org/gxd/marker/MGI:101914?tab=imagestab#gxd=markerMgiId%3DMGI%3A102764%26theilerStage%3D%26assayType%3D%26results%3D25%26startIndex%3D0%26sort%3D%26dir%3Dasc%26tab%3Dimagestab%26theilerStageFilter%3D12%26theilerStageFilter%3D13%26theilerStageFilter%3D14%26wildtypeFilter%3Dwild%20type
GPD2	0.886471	18.6286	9.4217e-78	3.27805e-76	1.96875	TRUE	0.811548	15.8721	4.94305e-57	3.15953e-55	0.0431233	0.844203	0.199278	0.50035	14	752	61	116	25	12	12	0	14	14	14	7		Forebrain	No images	NA	NA	No images	NA	Gpd2	glycerol phosphate dehydrogenase 2, mitochondrial	protein coding gene	http://www.informatics.jax.org/gxd/marker/MGI:99778?tab=imagestab#gxd=markerMgiId%3DMGI%3A102764%26theilerStage%3D%26assayType%3D%26results%3D25%26startIndex%3D0%26sort%3D%26dir%3Dasc%26tab%3Dimagestab%26theilerStageFilter%3D12%26theilerStageFilter%3D13%26theilerStageFilter%3D14%26wildtypeFilter%3Dwild%20type
PIM2	0.807349	18.1645	4.93444e-74	1.67234e-72	1.53256	TRUE	0.742658	15.5442	8.70506e-55	5.40568e-53	0.0316027	0.661889	0.254021	0.50035	14	385	61	116	25	12	12	0	14	14	14	7		Forebrain	No images	NA	NA	No images	NA	Pim2	proviral integration site 2	protein coding gene	http://www.informatics.jax.org/gxd/marker/MGI:97587?tab=imagestab#gxd=markerMgiId%3DMGI%3A102764%26theilerStage%3D%26assayType%3D%26results%3D25%26startIndex%3D0%26sort%3D%26dir%3Dasc%26tab%3Dimagestab%26theilerStageFilter%3D12%26theilerStageFilter%3D13%26theilerStageFilter%3D14%26wildtypeFilter%3Dwild%20type
SALL1	0.845109	36.2712	2.30568e-288	1.62166e-286	2.17484	TRUE	0.367595	14.7564	1.3996e-49	8.37331e-48	0.437985	17.6394	6.13351e-70	7.86653e-68	4	698	75	55	55	8	0	4	19	1	4	7	4	Forebrain	Global	No	High midline	High midline	Yes	Sall1	spalt like transcription factor 1	protein coding gene	http://www.informatics.jax.org/gxd/marker/MGI:1889585?tab=imagestab#gxd=markerMgiId%3DMGI%3A102764%26theilerStage%3D%26assayType%3D%26results%3D25%26startIndex%3D0%26sort%3D%26dir%3Dasc%26tab%3Dimagestab%26theilerStageFilter%3D12%26theilerStageFilter%3D13%26theilerStageFilter%3D14%26wildtypeFilter%3Dwild%20type
KLHL13	0.832338	15.7297	4.73268e-56	1.42438e-54	1.80728	TRUE	0.776966	13.7341	3.17062e-43	1.77257e-41	0.0232367	0.411219	0.340456	0.50035	14	403	61	116	25	12	12	0	14	14	14	7		Forebrain	No images	NA	NA	No images	NA	Klhl13	kelch-like 13	protein coding gene	http://www.informatics.jax.org/gxd/marker/MGI:1914705?tab=imagestab#gxd=markerMgiId%3DMGI%3A102764%26theilerStage%3D%26assayType%3D%26results%3D25%26startIndex%3D0%26sort%3D%26dir%3Dasc%26tab%3Dimagestab%26theilerStageFilter%3D12%26theilerStageFilter%3D13%26theilerStageFilter%3D14%26wildtypeFilter%3Dwild%20type
MYB	0.777314	16.8189	8.86881e-64	2.8298e-62	1.38295	TRUE	0.648178	13.0055	5.69264e-39	2.97884e-37	0.0599566	1.20496	0.11411	0.50035	14	384	151	35	25	12	12	0	14	14	14	7		Forebrain	Could not determine	NA	NA	Could not determine	NA	Myb	myeloblastosis oncogene	protein coding gene	http://www.informatics.jax.org/gxd/marker/MGI:97249?tab=imagestab#gxd=markerMgiId%3DMGI%3A102764%26theilerStage%3D%26assayType%3D%26results%3D25%26startIndex%3D0%26sort%3D%26dir%3Dasc%26tab%3Dimagestab%26theilerStageFilter%3D12%26theilerStageFilter%3D13%26theilerStageFilter%3D14%26wildtypeFilter%3Dwild%20type
NKX2-4	0.876784	51.7033	0	0	1.28209	TRUE	0.230816	12.833	5.35459e-38	2.75782e-36	0.438152	24.5717	1.26795e-133	2.64692e-131	9	581	123	61	61	14	14	14	9	9	9	7	3	Forebrain	No images	NA	NA	No images	NA	Nkx2-4	NK2 homeobox 4	protein coding gene	http://www.informatics.jax.org/gxd/marker/MGI:97349?tab=imagestab#gxd=markerMgiId%3DMGI%3A102764%26theilerStage%3D%26assayType%3D%26results%3D25%26startIndex%3D0%26sort%3D%26dir%3Dasc%26tab%3Dimagestab%26theilerStageFilter%3D12%26theilerStageFilter%3D13%26theilerStageFilter%3D14%26wildtypeFilter%3Dwild%20type
CD47	0.917432	21.3495	1.97142e-101	8.02598e-100	2.39046	TRUE	0.566021	12.304	4.30985e-35	2.07285e-33	0.149188	3.24598	0.000585241	0.0125237	4	236	80	55	55	8	0	4	19	1	4	7		Forebrain	No images	NA	NA	No images	NA	Cd47	CD47 antigen (Rh-related antigen, integrin-associated signal transducer)	protein coding gene	http://www.informatics.jax.org/gxd/marker/MGI:96617?tab=imagestab#gxd=markerMgiId%3DMGI%3A102764%26theilerStage%3D%26assayType%3D%26results%3D25%26startIndex%3D0%26sort%3D%26dir%3Dasc%26tab%3Dimagestab%26theilerStageFilter%3D12%26theilerStageFilter%3D13%26theilerStageFilter%3D14%26wildtypeFilter%3Dwild%20type
MIRG	0.743234	13.9471	1.63773e-44	4.32533e-43	1.76423	TRUE	0.693628	12.2688	6.65835e-35	3.179e-33	0.0349277	0.618221	0.268215	0.50035	4	278	140	57	57	7	0	4	19	1	4	7		Forebrain	No images	NA	NA	No images	NA	Mirg	miRNA containing gene	lncRNA gene	http://www.informatics.jax.org/gxd/marker/MGI:3781106?tab=imagestab#gxd=markerMgiId%3DMGI%3A102764%26theilerStage%3D%26assayType%3D%26results%3D25%26startIndex%3D0%26sort%3D%26dir%3Dasc%26tab%3Dimagestab%26theilerStageFilter%3D12%26theilerStageFilter%3D13%26theilerStageFilter%3D14%26wildtypeFilter%3Dwild%20type
CADPS2	0.871278	13.0275	4.26767e-39	1.03516e-37	1.21224	TRUE	0.830893	11.6064	1.91261e-31	8.81012e-30	0.0293392	0.410025	0.340894	0.50035	14	186	151	35	25	12	12	0	14	14	14	7		Forebrain	No images	NA	NA	No images	NA	Cadps2	Ca2+-dependent activator protein for secretion 2	protein coding gene	http://www.informatics.jax.org/gxd/marker/MGI:2443963?tab=imagestab#gxd=markerMgiId%3DMGI%3A102764%26theilerStage%3D%26assayType%3D%26results%3D25%26startIndex%3D0%26sort%3D%26dir%3Dasc%26tab%3Dimagestab%26theilerStageFilter%3D12%26theilerStageFilter%3D13%26theilerStageFilter%3D14%26wildtypeFilter%3Dwild%20type
TUBB4A	0.91298	28.3711	2.29757e-177	1.26644e-175	1.97918	TRUE	0.403647	11.5383	4.23124e-31	1.93092e-29	0.44592	12.7711	1.18831e-37	1.02273e-35	4	339	147	84	35	8	0	4	19	1	4	7	5	Forebrain	Global	No	High midline	Could not determine	NA	Tubb4a	tubulin, beta 4A class IVA	protein coding gene	http://www.informatics.jax.org/gxd/marker/MGI:107848?tab=imagestab#gxd=markerMgiId%3DMGI%3A102764%26theilerStage%3D%26assayType%3D%26results%3D25%26startIndex%3D0%26sort%3D%26dir%3Dasc%26tab%3Dimagestab%26theilerStageFilter%3D12%26theilerStageFilter%3D13%26theilerStageFilter%3D14%26wildtypeFilter%3Dwild%20type
LGI2	0.846582	13.3017	1.13162e-40	2.82877e-39	1.43182	TRUE	0.742678	10.8642	8.5376e-28	3.62626e-26	0.0858012	1.2563	0.104503	0.50035	14	111	151	35	25	12	12	0	14	14	14	7		Forebrain	No images	NA	NA	No images	NA	Lgi2	leucine-rich repeat LGI family, meMB/R1er 2	protein coding gene	http://www.informatics.jax.org/gxd/marker/MGI:2180196?tab=imagestab#gxd=markerMgiId%3DMGI%3A102764%26theilerStage%3D%26assayType%3D%26results%3D25%26startIndex%3D0%26sort%3D%26dir%3Dasc%26tab%3Dimagestab%26theilerStageFilter%3D12%26theilerStageFilter%3D13%26theilerStageFilter%3D14%26wildtypeFilter%3Dwild%20type
CTNNBIP1	0.827134	14.972	5.59323e-51	1.59529e-49	2.92411	TRUE	0.642709	10.8411	1.09854e-27	4.63585e-26	0.0821327	1.38454	0.083096	0.50035	6	142	77	76	1	20	20	20	20	6	6	7		Forebrain	No images	NA	NA	No images	NA	Ctnnbip1	catenin beta interacting protein 1	protein coding gene	http://www.informatics.jax.org/gxd/marker/MGI:1915756?tab=imagestab#gxd=markerMgiId%3DMGI%3A102764%26theilerStage%3D%26assayType%3D%26results%3D25%26startIndex%3D0%26sort%3D%26dir%3Dasc%26tab%3Dimagestab%26theilerStageFilter%3D12%26theilerStageFilter%3D13%26theilerStageFilter%3D14%26wildtypeFilter%3Dwild%20type
ADAMTS19	0.759558	12.6521	5.44353e-37	1.28233e-35	1.2291	TRUE	0.683649	10.69	5.66895e-27	2.35682e-25	0.0663942	1.03903	0.149395	0.50035	14	151	151	35	25	12	12	0	14	14	14	7		Forebrain	No images	NA	NA	No images	NA	Adamts19	a disintegrin-like and metallopeptidase (reprolysin type) with throMB/R1ospondin type 1 motif, 19	protein coding gene	http://www.informatics.jax.org/gxd/marker/MGI:2442875?tab=imagestab#gxd=markerMgiId%3DMGI%3A102764%26theilerStage%3D%26assayType%3D%26results%3D25%26startIndex%3D0%26sort%3D%26dir%3Dasc%26tab%3Dimagestab%26theilerStageFilter%3D12%26theilerStageFilter%3D13%26theilerStageFilter%3D14%26wildtypeFilter%3Dwild%20type
OTX2	0.938343	176.045	0	0	3.36746	TRUE	0.900215	157.869	0	0	0.188847	33.1067	1.18994e-240	4.02589e-238	3	847	211	105	38	38	4	10	21	3	3	8	1	Forebrain and Midbrain	FB, MB/R1	Yes	High lateral	Higher lateral	Yes	Otx2	orthodenticle homeobox 2	protein coding gene	http://www.informatics.jax.org/gxd/marker/MGI:97451?tab=imagestab#gxd=markerMgiId%3DMGI%3A102764%26theilerStage%3D%26assayType%3D%26results%3D25%26startIndex%3D0%26sort%3D%26dir%3Dasc%26tab%3Dimagestab%26theilerStageFilter%3D12%26theilerStageFilter%3D13%26theilerStageFilter%3D14%26wildtypeFilter%3Dwild%20type
OTX1	0.894115	95.9757	0	0	2.58034	TRUE	0.685596	68.9867	0	0	0.292853	29.4534	5.70216e-191	1.51207e-188	3	859	121	60	38	38	4	10	21	3	3	8	1	Forebrain and Midbrain	FB, MB/R1	Yes	High lateral	Higher lateral	Yes	Otx1	orthodenticle homeobox 1	protein coding gene	http://www.informatics.jax.org/gxd/marker/MGI:97450?tab=imagestab#gxd=markerMgiId%3DMGI%3A102764%26theilerStage%3D%26assayType%3D%26results%3D25%26startIndex%3D0%26sort%3D%26dir%3Dasc%26tab%3Dimagestab%26theilerStageFilter%3D12%26theilerStageFilter%3D13%26theilerStageFilter%3D14%26wildtypeFilter%3Dwild%20type
TAL2	0.916138	88.0465	0	0	2.58104	TRUE	0.708067	63.4466	0	0	0.346348	31.0096	1.99978e-211	5.77085e-209	3	497	121	60	38	38	4	10	21	3	3	8	1	Forebrain and Midbrain	No images	NA	High lateral	No images	NA	Tal2	T cell acute lymphocytic leukemia 2	protein coding gene	http://www.informatics.jax.org/gxd/marker/MGI:99540?tab=imagestab#gxd=markerMgiId%3DMGI%3A102764%26theilerStage%3D%26assayType%3D%26results%3D25%26startIndex%3D0%26sort%3D%26dir%3Dasc%26tab%3Dimagestab%26theilerStageFilter%3D12%26theilerStageFilter%3D13%26theilerStageFilter%3D14%26wildtypeFilter%3Dwild%20type
PHLDA1	0.937525	82.8915	0	0	3.08118	TRUE	0.723326	59.7518	0	0	0.204444	16.8725	3.58358e-64	4.36774e-62	3	436	181	90	16	16	4	10	21	3	3	8	2	Forebrain and Midbrain	No images	NA	Midline excluded	No images	NA	Phlda1	pleckstrin homology like domain, family A, meMB/R1er 1	protein coding gene	http://www.informatics.jax.org/gxd/marker/MGI:1096880?tab=imagestab#gxd=markerMgiId%3DMGI%3A102764%26theilerStage%3D%26assayType%3D%26results%3D25%26startIndex%3D0%26sort%3D%26dir%3Dasc%26tab%3Dimagestab%26theilerStageFilter%3D12%26theilerStageFilter%3D13%26theilerStageFilter%3D14%26wildtypeFilter%3Dwild%20type
LMO1	0.909672	67.3107	0	0	2.47321	TRUE	0.806665	56.3123	0	0	0.157512	10.9837	2.28841e-28	1.6437e-26	3	643	20	33	16	16	4	10	21	3	3	8	2	Forebrain and Midbrain	No images	NA	Midline excluded	No images	NA	Lmo1	LIM domain only 1	protein coding gene	http://www.informatics.jax.org/gxd/marker/MGI:102812?tab=imagestab#gxd=markerMgiId%3DMGI%3A102764%26theilerStage%3D%26assayType%3D%26results%3D25%26startIndex%3D0%26sort%3D%26dir%3Dasc%26tab%3Dimagestab%26theilerStageFilter%3D12%26theilerStageFilter%3D13%26theilerStageFilter%3D14%26wildtypeFilter%3Dwild%20type
INA	0.925191	55.1146	0	0	2.29048	TRUE	0.893254	49.9208	0	0	0.0873213	4.88083	5.28212e-07	1.63077e-05	3	429	88	33	16	16	4	10	21	3	3	8		Forebrain and Midbrain	No images	NA	NA	No images	NA	Ina	internexin neuronal intermediate filament protein, alpha	protein coding gene	http://www.informatics.jax.org/gxd/marker/MGI:96568?tab=imagestab#gxd=markerMgiId%3DMGI%3A102764%26theilerStage%3D%26assayType%3D%26results%3D25%26startIndex%3D0%26sort%3D%26dir%3Dasc%26tab%3Dimagestab%26theilerStageFilter%3D12%26theilerStageFilter%3D13%26theilerStageFilter%3D14%26wildtypeFilter%3Dwild%20type
EHBP1	0.916342	59.2277	0	0	2.33228	TRUE	0.79722	48.1653	0	0	0.278915	16.8447	5.73406e-64	6.94565e-62	3	466	121	60	38	38	4	10	21	3	3	8	1	Forebrain and Midbrain	No images	NA	High lateral	No images	NA	Ehbp1	EH domain binding protein 1	protein coding gene	http://www.informatics.jax.org/gxd/marker/MGI:2667252?tab=imagestab#gxd=markerMgiId%3DMGI%3A102764%26theilerStage%3D%26assayType%3D%26results%3D25%26startIndex%3D0%26sort%3D%26dir%3Dasc%26tab%3Dimagestab%26theilerStageFilter%3D12%26theilerStageFilter%3D13%26theilerStageFilter%3D14%26wildtypeFilter%3Dwild%20type
CAR4	0.899599	75.2996	0	0	3.32745	TRUE	0.623114	47.9845	0	0	0.513911	39.5647	0	0	5	735	183	91	20	42	13	13	2	5	5	8	0	Forebrain and Midbrain	No images	NA	High midline	No images	NA	Car4	carbonic anhydrase 4	protein coding gene	http://www.informatics.jax.org/gxd/marker/MGI:1096574?tab=imagestab#gxd=markerMgiId%3DMGI%3A102764%26theilerStage%3D%26assayType%3D%26results%3D25%26startIndex%3D0%26sort%3D%26dir%3Dasc%26tab%3Dimagestab%26theilerStageFilter%3D12%26theilerStageFilter%3D13%26theilerStageFilter%3D14%26wildtypeFilter%3Dwild%20type
WNT8B	0.873742	98.8341	0	0	2.62166	TRUE	0.387537	41.8788	0	0	0.254508	27.5272	4.14579e-167	1.01691e-164	12	701	50	101	50	5	5	5	5	12	12	8	1	Forebrain and Midbrain	Could not determine	NA	High lateral	Could not determine	NA	Wnt8b	wingless-type MMTV integration site family, meMB/R1er 8B	protein coding gene	http://www.informatics.jax.org/gxd/marker/MGI:109485?tab=imagestab#gxd=markerMgiId%3DMGI%3A102764%26theilerStage%3D%26assayType%3D%26results%3D25%26startIndex%3D0%26sort%3D%26dir%3Dasc%26tab%3Dimagestab%26theilerStageFilter%3D12%26theilerStageFilter%3D13%26theilerStageFilter%3D14%26wildtypeFilter%3Dwild%20type
LDHB	0.850707	44.0858	0	0	3.41131	TRUE	0.734258	35.4783	5.30793e-276	7.89072e-274	0.118379	5.70472	5.82677e-09	2.07135e-07	3	569	181	90	16	16	4	10	21	3	3	8		Forebrain and Midbrain	No images	NA	NA	No images	NA	Ldhb	lactate dehydrogenase B	protein coding gene	http://www.informatics.jax.org/gxd/marker/MGI:96763?tab=imagestab#gxd=markerMgiId%3DMGI%3A102764%26theilerStage%3D%26assayType%3D%26results%3D25%26startIndex%3D0%26sort%3D%26dir%3Dasc%26tab%3Dimagestab%26theilerStageFilter%3D12%26theilerStageFilter%3D13%26theilerStageFilter%3D14%26wildtypeFilter%3Dwild%20type
CLU	0.921215	41.2516	0	0	1.69508	TRUE	0.836321	35.0061	9.08978e-269	1.33111e-266	0.111358	4.65774	1.59853e-06	4.789e-05	3	365	58	59	16	16	4	10	21	3	3	8		Forebrain and Midbrain	FB, some MB/R1	Yes	NA	Could not determine	NA	Clu	clusterin	protein coding gene	http://www.informatics.jax.org/gxd/marker/MGI:88423?tab=imagestab#gxd=markerMgiId%3DMGI%3A102764%26theilerStage%3D%26assayType%3D%26results%3D25%26startIndex%3D0%26sort%3D%26dir%3Dasc%26tab%3Dimagestab%26theilerStageFilter%3D12%26theilerStageFilter%3D13%26theilerStageFilter%3D14%26wildtypeFilter%3Dwild%20type
CNTNAP2	0.887691	47.6807	0	0	2.22574	TRUE	0.490535	24.8484	1.34454e-136	1.32583e-134	0.426076	21.6059	7.90756e-104	1.38545e-101	12	832	50	101	50	5	5	5	5	12	12	8	1	Forebrain and Midbrain	No images	NA	High lateral	No images	NA	Cntnap2	contactin associated protein-like 2	protein coding gene	http://www.informatics.jax.org/gxd/marker/MGI:1914047?tab=imagestab#gxd=markerMgiId%3DMGI%3A102764%26theilerStage%3D%26assayType%3D%26results%3D25%26startIndex%3D0%26sort%3D%26dir%3Dasc%26tab%3Dimagestab%26theilerStageFilter%3D12%26theilerStageFilter%3D13%26theilerStageFilter%3D14%26wildtypeFilter%3Dwild%20type
CMTM8	0.80981	29.9517	2.08943e-197	1.22391e-195	2.26612	TRUE	0.700269	24.1989	1.14211e-129	1.0986e-127	0.104654	3.61212	0.000151854	0.00360319	3	791	88	33	16	16	4	10	21	3	3	8		Forebrain and Midbrain	No images	NA	NA	No images	NA	Cmtm8	CKLF-like MARVEL transmeMB/R1rane domain containing 8	protein coding gene	http://www.informatics.jax.org/gxd/marker/MGI:2447167?tab=imagestab#gxd=markerMgiId%3DMGI%3A102764%26theilerStage%3D%26assayType%3D%26results%3D25%26startIndex%3D0%26sort%3D%26dir%3Dasc%26tab%3Dimagestab%26theilerStageFilter%3D12%26theilerStageFilter%3D13%26theilerStageFilter%3D14%26wildtypeFilter%3Dwild%20type
BARHL2	0.83745	58.2749	0	0	1.81102	TRUE	0.356229	23.2716	4.30019e-120	4.03745e-118	0.186515	12.1894	1.76969e-34	1.44094e-32	12	712	50	101	50	5	5	5	5	12	12	8	1	Forebrain and Midbrain	Some FB, MB/R1	Yes	High lateral	Could not determine	NA	Barhl2	BarH like homeobox 2	protein coding gene	http://www.informatics.jax.org/gxd/marker/MGI:1859314?tab=imagestab#gxd=markerMgiId%3DMGI%3A102764%26theilerStage%3D%26assayType%3D%26results%3D25%26startIndex%3D0%26sort%3D%26dir%3Dasc%26tab%3Dimagestab%26theilerStageFilter%3D12%26theilerStageFilter%3D13%26theilerStageFilter%3D14%26wildtypeFilter%3Dwild%20type
WFDC2	0.886657	27.2256	1.61847e-163	8.49177e-162	2.27984	TRUE	0.730863	21.1016	3.84307e-99	3.32214e-97	0.117528	3.38674	0.000353648	0.00789734	14	453	156	39	8	6	28	0	14	14	14	8		Forebrain and Midbrain	FB, MB/R1	Yes	NA	Could not determine	NA	Wfdc2	WAP four-disulfide core domain 2	protein coding gene	http://www.informatics.jax.org/gxd/marker/MGI:1914951?tab=imagestab#gxd=markerMgiId%3DMGI%3A102764%26theilerStage%3D%26assayType%3D%26results%3D25%26startIndex%3D0%26sort%3D%26dir%3Dasc%26tab%3Dimagestab%26theilerStageFilter%3D12%26theilerStageFilter%3D13%26theilerStageFilter%3D14%26wildtypeFilter%3Dwild%20type
FOXA1	0.923698	268.943	0	0	2.17772	TRUE	0.0788901	20.9452	1.03749e-97	8.85162e-96	0.895635	238.785	0	0	9	1	113	113	27	25	25	25	9	9	9	8	6	Forebrain and Midbrain	Strong FB and MB/R1, weak HB	Yes	High midline	High midline	Yes	Foxa1	forkhead box A1	protein coding gene	http://www.informatics.jax.org/gxd/marker/MGI:1347472?tab=imagestab#gxd=markerMgiId%3DMGI%3A102764%26theilerStage%3D%26assayType%3D%26results%3D25%26startIndex%3D0%26sort%3D%26dir%3Dasc%26tab%3Dimagestab%26theilerStageFilter%3D12%26theilerStageFilter%3D13%26theilerStageFilter%3D14%26wildtypeFilter%3Dwild%20type
1700027J19RIK	0.865391	24.4101	6.68243e-132	3.11471e-130	2.03578	TRUE	0.777379	20.6665	3.47013e-95	2.9225e-93	0.169438	4.50159	3.37232e-06	9.76033e-05	3	490	58	59	16	16	4	10	21	3	3	8		Forebrain and Midbrain	No images	NA	NA	No images	NA	Cdc42ep5	CDC42 effector protein (Rho GTPase binding) 5	protein coding gene	http://www.informatics.jax.org/gxd/marker/MGI:1929745?tab=imagestab#gxd=markerMgiId%3DMGI%3A1929745%26theilerStage%3D%26assayType%3D%26results%3D25%26startIndex%3D0%26sort%3D%26dir%3Dasc%26tab%3Dimagestab%26theilerStageFilter%3D12%26theilerStageFilter%3D13%26theilerStageFilter%3D14%26wildtypeFilter%3Dwild%20type
WNT7B	0.850093	41.7722	0	0	1.56506	TRUE	0.434156	20.4083	7.06195e-93	5.92208e-91	0.343861	16.1588	4.92034e-59	5.64631e-57	12	217	50	101	50	5	5	5	5	12	12	8	1	Forebrain and Midbrain	FB, MB/R1	Yes	High lateral	Could not determine	NA	Wnt7b	wingless-type MMTV integration site family, meMB/R1er 7B	protein coding gene	http://www.informatics.jax.org/gxd/marker/MGI:98962?tab=imagestab#gxd=markerMgiId%3DMGI%3A102764%26theilerStage%3D%26assayType%3D%26results%3D25%26startIndex%3D0%26sort%3D%26dir%3Dasc%26tab%3Dimagestab%26theilerStageFilter%3D12%26theilerStageFilter%3D13%26theilerStageFilter%3D14%26wildtypeFilter%3Dwild%20type
SCD1	0.849042	25.8428	1.46614e-147	7.32064e-146	1.83282	TRUE	0.669085	19.0487	3.36584e-81	2.56996e-79	0.19881	5.65869	7.62666e-09	2.67724e-07	3	456	184	59	16	16	4	10	21	3	3	8		Forebrain and Midbrain	No images	NA	NA	No images	NA	Scd1	stearoyl-Coenzyme A desaturase 1	protein coding gene	http://www.informatics.jax.org/gxd/marker/MGI:98239?tab=imagestab#gxd=markerMgiId%3DMGI%3A102764%26theilerStage%3D%26assayType%3D%26results%3D25%26startIndex%3D0%26sort%3D%26dir%3Dasc%26tab%3Dimagestab%26theilerStageFilter%3D12%26theilerStageFilter%3D13%26theilerStageFilter%3D14%26wildtypeFilter%3Dwild%20type
MAP2	0.874758	63.5112	0	0	2.18432	TRUE	0.258668	17.2696	3.98152e-67	2.7804e-65	0.703115	47.1705	0	0	9	605	2	52	43	14	14	14	9	9	9	8	6	Forebrain and Midbrain	No images	NA	High midline	No images	NA	Map2	microtubule-associated protein 2	protein coding gene	http://www.informatics.jax.org/gxd/marker/MGI:97175?tab=imagestab#gxd=markerMgiId%3DMGI%3A102764%26theilerStage%3D%26assayType%3D%26results%3D25%26startIndex%3D0%26sort%3D%26dir%3Dasc%26tab%3Dimagestab%26theilerStageFilter%3D12%26theilerStageFilter%3D13%26theilerStageFilter%3D14%26wildtypeFilter%3Dwild%20type
GRRP1	0.835095	24.3031	9.08224e-131	4.22324e-129	1.94743	TRUE	0.575661	16.0089	5.54036e-58	3.55289e-56	0.403646	11.2272	1.49959e-29	1.11887e-27	12	684	73	80	14	5	5	5	5	12	12	8	1	Forebrain and Midbrain	No images	NA	High lateral	No images	NA	Fam110d	family with sequence similarity 110, meMB/R1er D	protein coding gene	http://www.informatics.jax.org/gxd/marker/MGI:1919940?tab=imagestab#gxd=markerMgiId%3DMGI%3A1919940%26theilerStage%3D%26assayType%3D%26results%3D25%26startIndex%3D0%26sort%3D%26dir%3Dasc%26tab%3Dimagestab%26theilerStageFilter%3D12%26theilerStageFilter%3D13%26theilerStageFilter%3D14%26wildtypeFilter%3Dwild%20type
EDARADD	0.814483	29.6742	8.27567e-194	4.76227e-192	1.57261	TRUE	0.450287	15.639	1.97382e-55	1.23351e-53	0.337458	11.7523	3.43745e-32	2.69812e-30	12	306	50	101	50	5	5	5	5	12	12	8	1	Forebrain and Midbrain	No images	NA	High lateral	No images	NA	Edaradd	EDAR (ectodysplasin-A receptor)-associated death domain	protein coding gene	http://www.informatics.jax.org/gxd/marker/MGI:1931001?tab=imagestab#gxd=markerMgiId%3DMGI%3A102764%26theilerStage%3D%26assayType%3D%26results%3D25%26startIndex%3D0%26sort%3D%26dir%3Dasc%26tab%3Dimagestab%26theilerStageFilter%3D12%26theilerStageFilter%3D13%26theilerStageFilter%3D14%26wildtypeFilter%3Dwild%20type
SORBS2	0.787932	19.1931	2.11396e-82	7.54222e-81	2.05694	TRUE	0.60185	13.5142	6.4478e-42	3.51459e-40	0.313767	7.04322	9.39253e-13	4.05968e-11	5	412	25	17	20	42	13	13	2	5	5	8		Forebrain and Midbrain	No images	NA	NA	No images	NA	Sorbs2	sorbin and SH3 domain containing 2	protein coding gene	http://www.informatics.jax.org/gxd/marker/MGI:1924574?tab=imagestab#gxd=markerMgiId%3DMGI%3A102764%26theilerStage%3D%26assayType%3D%26results%3D25%26startIndex%3D0%26sort%3D%26dir%3Dasc%26tab%3Dimagestab%26theilerStageFilter%3D12%26theilerStageFilter%3D13%26theilerStageFilter%3D14%26wildtypeFilter%3Dwild%20type
PLEKHA1	0.75004	19.338	1.28598e-83	4.6473e-82	2.73802	TRUE	0.557899	13.3804	3.93616e-41	2.11614e-39	0.209953	5.03138	2.43482e-07	7.74367e-06	5	282	25	17	20	42	13	13	2	5	5	8		Forebrain and Midbrain	FB, MB/R1	Yes	NA	Midline excluded	NA	Plekha1	pleckstrin homology domain containing, family A (phosphoinositide binding specific) meMB/R1er 1	protein coding gene	http://www.informatics.jax.org/gxd/marker/MGI:2442213?tab=imagestab#gxd=markerMgiId%3DMGI%3A102764%26theilerStage%3D%26assayType%3D%26results%3D25%26startIndex%3D0%26sort%3D%26dir%3Dasc%26tab%3Dimagestab%26theilerStageFilter%3D12%26theilerStageFilter%3D13%26theilerStageFilter%3D14%26wildtypeFilter%3Dwild%20type
FREM2	0.732242	22.1586	4.30875e-109	1.83806e-107	1.91746	TRUE	0.459432	12.9929	6.71545e-39	3.50471e-37	0.337596	9.55617	6.10999e-22	3.7585e-20	2	428	155	34	70	13	8	18	18	2	2	8		Forebrain and Midbrain	No images	NA	NA	No images	NA	Frem2	Fras1 related extracellular matrix protein 2	protein coding gene	http://www.informatics.jax.org/gxd/marker/MGI:2444465?tab=imagestab#gxd=markerMgiId%3DMGI%3A102764%26theilerStage%3D%26assayType%3D%26results%3D25%26startIndex%3D0%26sort%3D%26dir%3Dasc%26tab%3Dimagestab%26theilerStageFilter%3D12%26theilerStageFilter%3D13%26theilerStageFilter%3D14%26wildtypeFilter%3Dwild%20type
1700013H16RIK	0.86918	14.9363	9.56226e-51	2.71942e-49	1.43147	TRUE	0.708754	11.4607	1.0388e-30	4.70772e-29	0.267302	4.32107	7.76375e-06	0.000215485	12	592	73	80	14	5	5	5	5	12	12	8		Forebrain and Midbrain	No images	NA	NA	No images	NA	1700013H16Rik	RIKEN cDNA 1700013H16 gene	protein coding gene	http://www.informatics.jax.org/gxd/marker/MGI:1922764?tab=imagestab#gxd=markerMgiId%3DMGI%3A102764%26theilerStage%3D%26assayType%3D%26results%3D25%26startIndex%3D0%26sort%3D%26dir%3Dasc%26tab%3Dimagestab%26theilerStageFilter%3D12%26theilerStageFilter%3D13%26theilerStageFilter%3D14%26wildtypeFilter%3Dwild%20type
SLC2A1	0.867628	13.4424	1.70625e-41	4.30357e-40	4.20784	TRUE	0.764897	11.2424	1.26227e-29	5.62944e-28	0.093824	1.37512	0.0845475	0.50035	3	250	20	33	16	16	4	10	21	3	3	8		Forebrain and Midbrain	Could not determine	NA	NA	Global	NA	Slc2a1	solute carrier family 2 (facilitated glucose transporter), meMB/R1er 1	protein coding gene	http://www.informatics.jax.org/gxd/marker/MGI:95755?tab=imagestab#gxd=markerMgiId%3DMGI%3A102764%26theilerStage%3D%26assayType%3D%26results%3D25%26startIndex%3D0%26sort%3D%26dir%3Dasc%26tab%3Dimagestab%26theilerStageFilter%3D12%26theilerStageFilter%3D13%26theilerStageFilter%3D14%26wildtypeFilter%3Dwild%20type
CPE	0.879614	13.3394	6.8239e-41	1.70798e-39	2.2165	TRUE	0.783498	11.1904	2.27165e-29	1.00852e-27	0.187624	2.67824	0.0037005	0.0681191	12	100	238	1	14	5	5	5	5	12	12	8		Forebrain and Midbrain	No images	NA	NA	No images	NA	Cpe	carboxypeptidase E	protein coding gene	http://www.informatics.jax.org/gxd/marker/MGI:101932?tab=imagestab#gxd=markerMgiId%3DMGI%3A102764%26theilerStage%3D%26assayType%3D%26results%3D25%26startIndex%3D0%26sort%3D%26dir%3Dasc%26tab%3Dimagestab%26theilerStageFilter%3D12%26theilerStageFilter%3D13%26theilerStageFilter%3D14%26wildtypeFilter%3Dwild%20type
RNF152	0.764546	16.8174	9.0984e-64	2.89834e-62	1.68527	TRUE	0.539921	11.1195	5.04167e-29	2.20832e-27	0.27159	5.59511	1.10244e-08	3.82887e-07	12	402	117	80	14	5	5	5	5	12	12	8		Forebrain and Midbrain	No images	NA	NA	No images	NA	Rnf152	ring finger protein 152	protein coding gene	http://www.informatics.jax.org/gxd/marker/MGI:2443787?tab=imagestab#gxd=markerMgiId%3DMGI%3A102764%26theilerStage%3D%26assayType%3D%26results%3D25%26startIndex%3D0%26sort%3D%26dir%3Dasc%26tab%3Dimagestab%26theilerStageFilter%3D12%26theilerStageFilter%3D13%26theilerStageFilter%3D14%26wildtypeFilter%3Dwild%20type
KIF21A	0.912025	20.9813	4.85961e-98	1.93428e-96	2.8812	TRUE	0.506248	10.8187	1.4044e-27	5.90119e-26	0.4401	9.42842	2.0816e-21	1.26462e-19	4	763	147	84	35	8	0	4	19	1	4	8		Forebrain and Midbrain	Could not determine	NA	NA	Could not determine	NA	Kif21a	kinesin family meMB/R1er 21A	protein coding gene	http://www.informatics.jax.org/gxd/marker/MGI:109188?tab=imagestab#gxd=markerMgiId%3DMGI%3A102764%26theilerStage%3D%26assayType%3D%26results%3D25%26startIndex%3D0%26sort%3D%26dir%3Dasc%26tab%3Dimagestab%26theilerStageFilter%3D12%26theilerStageFilter%3D13%26theilerStageFilter%3D14%26wildtypeFilter%3Dwild%20type
3632451O06RIK	0.848507	17.0049	3.77443e-65	1.2122e-63	2.01993	TRUE	0.57505	10.8133	1.48891e-27	6.24292e-26	0.234586	4.41975	4.94086e-06	0.000140514	12	149	238	1	14	5	5	5	5	12	12	8		Forebrain and Midbrain	FB, MB/R1	Yes	NA	Could not determine	NA	Armh4	armadillo-like helical domain containing 4	protein coding gene	http://www.informatics.jax.org/gxd/marker/MGI:1914669?tab=imagestab#gxd=markerMgiId%3DMGI%3A1914669%26theilerStage%3D%26assayType%3D%26results%3D25%26startIndex%3D0%26sort%3D%26dir%3Dasc%26tab%3Dimagestab%26theilerStageFilter%3D12%26theilerStageFilter%3D13%26theilerStageFilter%3D14%26wildtypeFilter%3Dwild%20type
TMEM38B	0.884528	13.651	9.9497e-43	2.54554e-41	1.76137	TRUE	0.705925	10.1433	1.77512e-24	6.99462e-23	0.269268	3.86841	5.47726e-05	0.0013815	12	86	117	80	14	5	5	5	5	12	12	8		Forebrain and Midbrain	No images	NA	NA	No images	NA	Tmem38b	transmeMB/R1rane protein 38B	protein coding gene	http://www.informatics.jax.org/gxd/marker/MGI:1098718?tab=imagestab#gxd=markerMgiId%3DMGI%3A102764%26theilerStage%3D%26assayType%3D%26results%3D25%26startIndex%3D0%26sort%3D%26dir%3Dasc%26tab%3Dimagestab%26theilerStageFilter%3D12%26theilerStageFilter%3D13%26theilerStageFilter%3D14%26wildtypeFilter%3Dwild%20type
FAM181B	0.937082	191.636	0	0	3.86416	TRUE	0.759844	144.097	0	0	0.111903	21.204	4.38404e-100	7.6131e-98	11	831	207	20	42	17	2	11	11	11	11	9	2	Midbrain/R1 and Hindbrain	No images	NA	Midline excluded	No images	NA	Fam181b	family with sequence similarity 181, meMB/R1er B	protein coding gene	http://www.informatics.jax.org/gxd/marker/MGI:1930951?tab=imagestab#gxd=markerMgiId%3DMGI%3A102764%26theilerStage%3D%26assayType%3D%26results%3D25%26startIndex%3D0%26sort%3D%26dir%3Dasc%26tab%3Dimagestab%26theilerStageFilter%3D12%26theilerStageFilter%3D13%26theilerStageFilter%3D14%26wildtypeFilter%3Dwild%20type
HES3	0.929893	136.587	0	0	3.10224	TRUE	0.711632	95.9716	0	0	0.119364	16.1142	1.01393e-58	1.15677e-56	2	457	228	28	58	23	23	23	1	2	2	9	2	Midbrain/R1 and Hindbrain	MB/R1, HB	Yes	Midline excluded	Midline excluded	Yes	Hes3	hes family bHLH transcription factor 3	protein coding gene	http://www.informatics.jax.org/gxd/marker/MGI:104877?tab=imagestab#gxd=markerMgiId%3DMGI%3A102764%26theilerStage%3D%26assayType%3D%26results%3D25%26startIndex%3D0%26sort%3D%26dir%3Dasc%26tab%3Dimagestab%26theilerStageFilter%3D12%26theilerStageFilter%3D13%26theilerStageFilter%3D14%26wildtypeFilter%3Dwild%20type
TNFRSF19	0.933101	88.5224	0	0	2.33872	TRUE	0.745213	65.681	0	0	0.116791	10.3037	3.38869e-25	2.27727e-23	11	501	223	20	42	17	2	11	11	11	11	9	2	Midbrain/R1 and Hindbrain	No images	NA	Midline excluded	No images	NA	Tnfrsf19	tumor necrosis factor receptor superfamily, meMB/R1er 19	protein coding gene	http://www.informatics.jax.org/gxd/marker/MGI:1352474?tab=imagestab#gxd=markerMgiId%3DMGI%3A102764%26theilerStage%3D%26assayType%3D%26results%3D25%26startIndex%3D0%26sort%3D%26dir%3Dasc%26tab%3Dimagestab%26theilerStageFilter%3D12%26theilerStageFilter%3D13%26theilerStageFilter%3D14%26wildtypeFilter%3Dwild%20type
POU3F2	0.915489	73.8168	0	0	2.48937	TRUE	0.729589	55.0713	0	0	0.0471273	3.55992	0.000185487	0.00435204	11	538	268	27	56	17	2	11	11	11	11	9		Midbrain/R1 and Hindbrain	MB/R1, HB	Yes	NA	Midline excluded	NA	Pou3f2	POU domain, class 3, transcription factor 2	protein coding gene	http://www.informatics.jax.org/gxd/marker/MGI:101895?tab=imagestab#gxd=markerMgiId%3DMGI%3A102764%26theilerStage%3D%26assayType%3D%26results%3D25%26startIndex%3D0%26sort%3D%26dir%3Dasc%26tab%3Dimagestab%26theilerStageFilter%3D12%26theilerStageFilter%3D13%26theilerStageFilter%3D14%26wildtypeFilter%3Dwild%20type
WLS	0.929292	72.6646	0	0	3.39656	TRUE	0.707407	51.245	0	0	0.126835	9.18603	2.03798e-20	1.2082e-18	7	659	164	77	24	19	19	19	0	7	7	9		Midbrain/R1 and Hindbrain	No images	NA	NA	No images	NA	Wls	wntless WNT ligand secretion mediator	protein coding gene	http://www.informatics.jax.org/gxd/marker/MGI:1915401?tab=imagestab#gxd=markerMgiId%3DMGI%3A102764%26theilerStage%3D%26assayType%3D%26results%3D25%26startIndex%3D0%26sort%3D%26dir%3Dasc%26tab%3Dimagestab%26theilerStageFilter%3D12%26theilerStageFilter%3D13%26theilerStageFilter%3D14%26wildtypeFilter%3Dwild%20type
IGDCC3	0.922051	71.8674	0	0	2.63761	TRUE	0.667088	48.2204	0	0	0.173372	12.5364	2.36063e-36	1.96282e-34	11	563	223	20	42	17	2	11	11	11	11	9	1	Midbrain/R1 and Hindbrain	Could not determine	NA	High lateral	Midline excluded	Yes	Igdcc3	immunoglobulin superfamily, DCC subclass, meMB/R1er 3	protein coding gene	http://www.informatics.jax.org/gxd/marker/MGI:1202390?tab=imagestab#gxd=markerMgiId%3DMGI%3A102764%26theilerStage%3D%26assayType%3D%26results%3D25%26startIndex%3D0%26sort%3D%26dir%3Dasc%26tab%3Dimagestab%26theilerStageFilter%3D12%26theilerStageFilter%3D13%26theilerStageFilter%3D14%26wildtypeFilter%3Dwild%20type
SP9	0.905661	58.6715	0	0	1.74485	TRUE	0.717493	43.4445	0	0	0.0633046	3.84281	6.08176e-05	0.00152222	2	702	37	28	58	23	23	23	1	2	2	9		Midbrain/R1 and Hindbrain	No images	NA	NA	No images	NA	Sp9	trans-acting transcription factor 9	protein coding gene	http://www.informatics.jax.org/gxd/marker/MGI:3574660?tab=imagestab#gxd=markerMgiId%3DMGI%3A102764%26theilerStage%3D%26assayType%3D%26results%3D25%26startIndex%3D0%26sort%3D%26dir%3Dasc%26tab%3Dimagestab%26theilerStageFilter%3D12%26theilerStageFilter%3D13%26theilerStageFilter%3D14%26wildtypeFilter%3Dwild%20type
AXIN2	0.880709	67.6587	0	0	2.48705	TRUE	0.609058	43.3807	0	0	0.269028	19.1632	3.75545e-82	5.49949e-80	11	715	159	20	42	17	2	11	11	11	11	9	1	Midbrain/R1 and Hindbrain	MB/R1, HB	Yes	High lateral	High lateral	Yes	Axin2	axin 2	protein coding gene	http://www.informatics.jax.org/gxd/marker/MGI:1270862?tab=imagestab#gxd=markerMgiId%3DMGI%3A102764%26theilerStage%3D%26assayType%3D%26results%3D25%26startIndex%3D0%26sort%3D%26dir%3Dasc%26tab%3Dimagestab%26theilerStageFilter%3D12%26theilerStageFilter%3D13%26theilerStageFilter%3D14%26wildtypeFilter%3Dwild%20type
IRF2BPL	0.883783	53.2464	0	0	2.3219	TRUE	0.687866	38.1342	0	0	0.156472	8.67426	2.08116e-18	1.12194e-16	11	753	57	8	36	36	2	11	11	11	11	9		Midbrain/R1 and Hindbrain	No images	NA	NA	No images	NA	Irf2bpl	interferon regulatory factor 2 binding protein-like	protein coding gene	http://www.informatics.jax.org/gxd/marker/MGI:2442463?tab=imagestab#gxd=markerMgiId%3DMGI%3A102764%26theilerStage%3D%26assayType%3D%26results%3D25%26startIndex%3D0%26sort%3D%26dir%3Dasc%26tab%3Dimagestab%26theilerStageFilter%3D12%26theilerStageFilter%3D13%26theilerStageFilter%3D14%26wildtypeFilter%3Dwild%20type
MYLK	0.842434	56.5877	0	0	2.29458	TRUE	0.541738	33.5621	3.00233e-247	4.14893e-245	0.242949	15.0652	1.37115e-51	1.43883e-49	11	544	159	20	42	17	2	11	11	11	11	9	2	Midbrain/R1 and Hindbrain	Could not determine	NA	Midline excluded	Could not determine	NA	Mylk	myosin, light polypeptide kinase	protein coding gene	http://www.informatics.jax.org/gxd/marker/MGI:894806?tab=imagestab#gxd=markerMgiId%3DMGI%3A102764%26theilerStage%3D%26assayType%3D%26results%3D25%26startIndex%3D0%26sort%3D%26dir%3Dasc%26tab%3Dimagestab%26theilerStageFilter%3D12%26theilerStageFilter%3D13%26theilerStageFilter%3D14%26wildtypeFilter%3Dwild%20type
CD24A	0.886593	29.7378	1.24834e-194	7.20473e-193	3.29904	TRUE	0.828583	25.9659	6.01585e-149	6.24598e-147	0.0276448	0.865826	0.193293	0.50035	7	493	246	30	62	19	19	19	0	7	7	9		Midbrain/R1 and Hindbrain	No images	NA	NA	No images	NA	Cd24a	CD24a antigen	protein coding gene	http://www.informatics.jax.org/gxd/marker/MGI:88323?tab=imagestab#gxd=markerMgiId%3DMGI%3A102764%26theilerStage%3D%26assayType%3D%26results%3D25%26startIndex%3D0%26sort%3D%26dir%3Dasc%26tab%3Dimagestab%26theilerStageFilter%3D12%26theilerStageFilter%3D13%26theilerStageFilter%3D14%26wildtypeFilter%3Dwild%20type
MEX3B	0.881003	31.3628	3.25048e-216	1.97474e-214	2.28411	TRUE	0.693479	22.9095	1.86674e-116	1.72788e-114	0.0645812	2.13258	0.0164795	0.243506	11	650	197	27	56	17	2	11	11	11	11	9		Midbrain/R1 and Hindbrain	No images	NA	NA	No images	NA	Mex3b	mex3 RNA binding family meMB/R1er B	protein coding gene	http://www.informatics.jax.org/gxd/marker/MGI:1918252?tab=imagestab#gxd=markerMgiId%3DMGI%3A102764%26theilerStage%3D%26assayType%3D%26results%3D25%26startIndex%3D0%26sort%3D%26dir%3Dasc%26tab%3Dimagestab%26theilerStageFilter%3D12%26theilerStageFilter%3D13%26theilerStageFilter%3D14%26wildtypeFilter%3Dwild%20type
PRKAR2B	0.900126	25.6743	1.13213e-145	5.61003e-144	2.25143	TRUE	0.689827	18.2221	1.72385e-74	1.25751e-72	0.0822505	2.17151	0.0149463	0.225262	11	707	197	27	56	17	2	11	11	11	11	9		Midbrain/R1 and Hindbrain	No images	NA	NA	No images	NA	Prkar2b	protein kinase, cAMP dependent regulatory, type II beta	protein coding gene	http://www.informatics.jax.org/gxd/marker/MGI:97760?tab=imagestab#gxd=markerMgiId%3DMGI%3A102764%26theilerStage%3D%26assayType%3D%26results%3D25%26startIndex%3D0%26sort%3D%26dir%3Dasc%26tab%3Dimagestab%26theilerStageFilter%3D12%26theilerStageFilter%3D13%26theilerStageFilter%3D14%26wildtypeFilter%3Dwild%20type
RND3	0.884189	25.4235	6.94016e-143	3.40467e-141	2.21047	TRUE	0.608762	16.3166	3.75922e-60	2.44262e-58	0.212226	5.69551	6.15036e-09	2.18243e-07	13	108	143	25	9	2	27	27	6	13	13	9		Midbrain/R1 and Hindbrain	No images	NA	NA	No images	NA	Rnd3	Rho family GTPase 3	protein coding gene	http://www.informatics.jax.org/gxd/marker/MGI:1921444?tab=imagestab#gxd=markerMgiId%3DMGI%3A102764%26theilerStage%3D%26assayType%3D%26results%3D25%26startIndex%3D0%26sort%3D%26dir%3Dasc%26tab%3Dimagestab%26theilerStageFilter%3D12%26theilerStageFilter%3D13%26theilerStageFilter%3D14%26wildtypeFilter%3Dwild%20type
CLEC2L	0.873071	40.137	0	0	1.72794	TRUE	0.349318	14.7348	1.92637e-49	1.14897e-47	0.550311	23.3052	1.96155e-120	3.9277e-118	1	608	275	11	13	18	18	3	3	16	1	9	0	Midbrain/R1 and Hindbrain	No images	NA	High midline	No images	NA	Clec2l	C-type lectin domain family 2, meMB/R1er L	protein coding gene	http://www.informatics.jax.org/gxd/marker/MGI:2141402?tab=imagestab#gxd=markerMgiId%3DMGI%3A102764%26theilerStage%3D%26assayType%3D%26results%3D25%26startIndex%3D0%26sort%3D%26dir%3Dasc%26tab%3Dimagestab%26theilerStageFilter%3D12%26theilerStageFilter%3D13%26theilerStageFilter%3D14%26wildtypeFilter%3Dwild%20type
EPS8	0.779522	20.9588	7.80571e-98	3.08813e-96	1.58063	TRUE	0.572636	14.3283	7.27833e-47	4.22552e-45	0.0286577	0.717239	0.236613	0.50035	2	394	46	18	22	45	10	21	1	2	2	9		Midbrain/R1 and Hindbrain	No images	NA	NA	No images	NA	Eps8	epidermal growth factor receptor pathway substrate 8	protein coding gene	http://www.informatics.jax.org/gxd/marker/MGI:104684?tab=imagestab#gxd=markerMgiId%3DMGI%3A102764%26theilerStage%3D%26assayType%3D%26results%3D25%26startIndex%3D0%26sort%3D%26dir%3Dasc%26tab%3Dimagestab%26theilerStageFilter%3D12%26theilerStageFilter%3D13%26theilerStageFilter%3D14%26wildtypeFilter%3Dwild%20type
GALNT7	0.876531	21.1497	1.38917e-99	5.58599e-98	2.04166	TRUE	0.60835	13.8216	9.43617e-44	5.30562e-42	0.199759	4.53574	2.87007e-06	8.41016e-05	7	272	90	30	62	19	19	19	0	7	7	9		Midbrain/R1 and Hindbrain	No images	NA	NA	No images	NA	Galnt7	polypeptide N-acetylgalactosaminyltransferase 7	protein coding gene	http://www.informatics.jax.org/gxd/marker/MGI:1349449?tab=imagestab#gxd=markerMgiId%3DMGI%3A102764%26theilerStage%3D%26assayType%3D%26results%3D25%26startIndex%3D0%26sort%3D%26dir%3Dasc%26tab%3Dimagestab%26theilerStageFilter%3D12%26theilerStageFilter%3D13%26theilerStageFilter%3D14%26wildtypeFilter%3Dwild%20type
BC024139	0.886425	27.9299	5.77766e-172	3.12328e-170	1.166	TRUE	0.478112	13.7903	1.45695e-43	8.16852e-42	0.461766	13.3782	4.05521e-41	3.65025e-39	1	812	275	11	13	18	18	3	3	16	1	9	0	Midbrain/R1 and Hindbrain	No images	NA	High midline	No images	NA	BC024139	cDNA sequence BC024139	protein coding gene	http://www.informatics.jax.org/gxd/marker/MGI:2442591?tab=imagestab#gxd=markerMgiId%3DMGI%3A102764%26theilerStage%3D%26assayType%3D%26results%3D25%26startIndex%3D0%26sort%3D%26dir%3Dasc%26tab%3Dimagestab%26theilerStageFilter%3D12%26theilerStageFilter%3D13%26theilerStageFilter%3D14%26wildtypeFilter%3Dwild%20type
EMP1	0.783756	28.1782	5.41365e-175	2.94272e-173	1.42616	TRUE	0.377365	13.3265	8.11459e-41	4.35062e-39	0.462815	16.3605	1.83043e-60	2.15081e-58	8	770	12	106	51	0	3	8	8	8	8	9	1	Midbrain/R1 and Hindbrain	Could not determine	NA	High lateral	Could not determine	NA	Emp1	epithelial meMB/R1rane protein 1	protein coding gene	http://www.informatics.jax.org/gxd/marker/MGI:107941?tab=imagestab#gxd=markerMgiId%3DMGI%3A102764%26theilerStage%3D%26assayType%3D%26results%3D25%26startIndex%3D0%26sort%3D%26dir%3Dasc%26tab%3Dimagestab%26theilerStageFilter%3D12%26theilerStageFilter%3D13%26theilerStageFilter%3D14%26wildtypeFilter%3Dwild%20type
TUBB2A	0.815632	17.3521	9.50265e-68	3.10267e-66	1.70045	TRUE	0.670388	13.324	8.3947e-41	4.48853e-39	0.165616	3.2912	0.000498806	0.0107561	2	283	185	119	30	9	10	21	1	2	2	9		Midbrain/R1 and Hindbrain	Could not determine	NA	NA	Could not determine	NA	Tubb2a	tubulin, beta 2A class IIA	protein coding gene	http://www.informatics.jax.org/gxd/marker/MGI:107861?tab=imagestab#gxd=markerMgiId%3DMGI%3A102764%26theilerStage%3D%26assayType%3D%26results%3D25%26startIndex%3D0%26sort%3D%26dir%3Dasc%26tab%3Dimagestab%26theilerStageFilter%3D12%26theilerStageFilter%3D13%26theilerStageFilter%3D14%26wildtypeFilter%3Dwild%20type
PHOX2A	0.898014	15.7005	7.50234e-56	2.25449e-54	1.3518	TRUE	0.801087	13.0369	3.77086e-39	1.98913e-37	0.0369555	0.601979	0.273594	0.50035	2	506	135	18	22	45	10	21	1	2	2	9		Midbrain/R1 and Hindbrain	Could not determine	NA	NA	Midline excluded	NA	Phox2a	paired-like homeobox 2a	protein coding gene	http://www.informatics.jax.org/gxd/marker/MGI:106633?tab=imagestab#gxd=markerMgiId%3DMGI%3A102764%26theilerStage%3D%26assayType%3D%26results%3D25%26startIndex%3D0%26sort%3D%26dir%3Dasc%26tab%3Dimagestab%26theilerStageFilter%3D12%26theilerStageFilter%3D13%26theilerStageFilter%3D14%26wildtypeFilter%3Dwild%20type
ANO1	0.782298	18.6486	6.47778e-78	2.25779e-76	1.36597	TRUE	0.553574	12.5918	1.17092e-36	5.89151e-35	0.0669781	1.52213	0.0639888	0.50035	13	274	81	25	9	2	27	27	6	13	13	9		Midbrain/R1 and Hindbrain	MB/R1, HB	Yes	NA	Lateral (MB/R1), Juxta-midline (HB)	NA	Ano1	anoctamin 1, calcium activated chloride channel	protein coding gene	http://www.informatics.jax.org/gxd/marker/MGI:2142149?tab=imagestab#gxd=markerMgiId%3DMGI%3A102764%26theilerStage%3D%26assayType%3D%26results%3D25%26startIndex%3D0%26sort%3D%26dir%3Dasc%26tab%3Dimagestab%26theilerStageFilter%3D12%26theilerStageFilter%3D13%26theilerStageFilter%3D14%26wildtypeFilter%3Dwild%20type
EFNB3	0.807953	16.6186	2.55478e-62	8.08588e-61	2.03625	TRUE	0.640697	12.3131	3.85082e-35	1.85663e-33	0.0922547	1.77592	0.0378731	0.46859	2	212	225	18	22	45	10	21	1	2	2	9		Midbrain/R1 and Hindbrain	Could not determine	NA	NA	Could not determine	NA	Efnb3	ephrin B3	protein coding gene	http://www.informatics.jax.org/gxd/marker/MGI:109196?tab=imagestab#gxd=markerMgiId%3DMGI%3A102764%26theilerStage%3D%26assayType%3D%26results%3D25%26startIndex%3D0%26sort%3D%26dir%3Dasc%26tab%3Dimagestab%26theilerStageFilter%3D12%26theilerStageFilter%3D13%26theilerStageFilter%3D14%26wildtypeFilter%3Dwild%20type
ASCL1	0.761946	37.7809	0	0	1.82164	TRUE	0.235257	12.2381	9.73237e-35	4.62417e-33	0.149432	7.90166	1.37605e-15	6.56986e-14	12	689	95	63	63	31	31	5	5	12	12	9		Midbrain/R1 and Hindbrain	MB/R1, HB	Yes	NA	Could not determine	NA	Ascl1	achaete-scute family bHLH transcription factor 1	protein coding gene	http://www.informatics.jax.org/gxd/marker/MGI:96919?tab=imagestab#gxd=markerMgiId%3DMGI%3A102764%26theilerStage%3D%26assayType%3D%26results%3D25%26startIndex%3D0%26sort%3D%26dir%3Dasc%26tab%3Dimagestab%26theilerStageFilter%3D12%26theilerStageFilter%3D13%26theilerStageFilter%3D14%26wildtypeFilter%3Dwild%20type
BTBD17	0.803824	20.4809	1.59369e-93	6.16822e-92	2.14699	TRUE	0.453184	10.8838	6.8862e-28	2.93119e-26	0.233524	5.62779	9.12662e-09	3.19806e-07	2	443	185	119	30	9	10	21	1	2	2	9		Midbrain/R1 and Hindbrain	Could not determine	NA	NA	Could not determine	NA	Btbd17	BTB (POZ) domain containing 17	protein coding gene	http://www.informatics.jax.org/gxd/marker/MGI:1919264?tab=imagestab#gxd=markerMgiId%3DMGI%3A102764%26theilerStage%3D%26assayType%3D%26results%3D25%26startIndex%3D0%26sort%3D%26dir%3Dasc%26tab%3Dimagestab%26theilerStageFilter%3D12%26theilerStageFilter%3D13%26theilerStageFilter%3D14%26wildtypeFilter%3Dwild%20type
TSPAN13	0.912931	14.1919	5.14198e-46	1.38221e-44	2.58222	TRUE	0.72278	10.4176	1.03026e-25	4.18569e-24	0.105816	1.52714	0.0633628	0.50035	11	144	200	27	56	17	2	11	11	11	11	9		Midbrain/R1 and Hindbrain	Could not determine	NA	NA	Could not determine	NA	Tspan13	tetraspanin 13	protein coding gene	http://www.informatics.jax.org/gxd/marker/MGI:1913359?tab=imagestab#gxd=markerMgiId%3DMGI%3A102764%26theilerStage%3D%26assayType%3D%26results%3D25%26startIndex%3D0%26sort%3D%26dir%3Dasc%26tab%3Dimagestab%26theilerStageFilter%3D12%26theilerStageFilter%3D13%26theilerStageFilter%3D14%26wildtypeFilter%3Dwild%20type
PLTP	0.895383	20.7308	9.13906e-96	3.58671e-94	1.48474	TRUE	0.48677	10.3668	1.75468e-25	7.08481e-24	0.446947	9.54697	6.6774e-22	4.0947e-20	1	404	275	11	13	18	18	3	3	16	1	9		Midbrain/R1 and Hindbrain	Could not determine	NA	NA	Could not determine	NA	Pltp	phospholipid transfer protein	protein coding gene	http://www.informatics.jax.org/gxd/marker/MGI:103151?tab=imagestab#gxd=markerMgiId%3DMGI%3A102764%26theilerStage%3D%26assayType%3D%26results%3D25%26startIndex%3D0%26sort%3D%26dir%3Dasc%26tab%3Dimagestab%26theilerStageFilter%3D12%26theilerStageFilter%3D13%26theilerStageFilter%3D14%26wildtypeFilter%3Dwild%20type
FGF3	0.934512	119.166	0	0	2.4372	TRUE	0.695992	81.1767	0	0	0.161642	18.8447	1.62453e-79	2.26087e-77	10	387	193	89	18	4	9	9	4	4	10	10	3	Posterior Hindbrain	R5, R6 (Posterior HB)	Yes	NA	Midline excluded	NA	Fgf3	fibroblast growth factor 3	protein coding gene	http://www.informatics.jax.org/gxd/marker/MGI:95517?tab=imagestab#gxd=markerMgiId%3DMGI%3A102764%26theilerStage%3D%26assayType%3D%26results%3D25%26startIndex%3D0%26sort%3D%26dir%3Dasc%26tab%3Dimagestab%26theilerStageFilter%3D12%26theilerStageFilter%3D13%26theilerStageFilter%3D14%26wildtypeFilter%3Dwild%20type
HOXB1	0.909701	147.886	0	0	2.58819	TRUE	0.518624	78.2626	0	0	0.0813835	12.2165	1.26963e-34	1.03808e-32	10	776	60	2	28	11	11	24	4	4	10	10	4	Posterior Hindbrain	R4 (Posterior HB)	Yes	High midline	Midline excluded	No	Hoxb1	homeobox B1	protein coding gene	http://www.informatics.jax.org/gxd/marker/MGI:96182?tab=imagestab#gxd=markerMgiId%3DMGI%3A102764%26theilerStage%3D%26assayType%3D%26results%3D25%26startIndex%3D0%26sort%3D%26dir%3Dasc%26tab%3Dimagestab%26theilerStageFilter%3D12%26theilerStageFilter%3D13%26theilerStageFilter%3D14%26wildtypeFilter%3Dwild%20type
CAR10	0.906449	77.7604	0	0	1.8406	TRUE	0.719734	57.0577	0	0	0.280921	22.215	1.22964e-109	2.25507e-107	0	537	192	111	19	10	7	15	15	15	0	10	3	Posterior Hindbrain	No images	NA	NA	No images	NA	Car10	carbonic anhydrase 10	protein coding gene	http://www.informatics.jax.org/gxd/marker/MGI:1919855?tab=imagestab#gxd=markerMgiId%3DMGI%3A102764%26theilerStage%3D%26assayType%3D%26results%3D25%26startIndex%3D0%26sort%3D%26dir%3Dasc%26tab%3Dimagestab%26theilerStageFilter%3D12%26theilerStageFilter%3D13%26theilerStageFilter%3D14%26wildtypeFilter%3Dwild%20type
UPP1	0.928794	104.369	0	0	2.11552	TRUE	0.461127	47.6424	0	0	0.3445	35.6128	4.44389e-278	1.64533e-275	10	575	287	22	18	4	9	9	4	4	10	10	6	Posterior Hindbrain	No images	NA	High midline	No images	NA	Upp1	uridine phosphorylase 1	protein coding gene	http://www.informatics.jax.org/gxd/marker/MGI:1097668?tab=imagestab#gxd=markerMgiId%3DMGI%3A102764%26theilerStage%3D%26assayType%3D%26results%3D25%26startIndex%3D0%26sort%3D%26dir%3Dasc%26tab%3Dimagestab%26theilerStageFilter%3D12%26theilerStageFilter%3D13%26theilerStageFilter%3D14%26wildtypeFilter%3Dwild%20type
PLXNA2	0.880604	59.6401	0	0	2.45655	TRUE	0.743497	47.2642	0	0	0.171624	10.8722	7.82319e-28	5.5221e-26	0	542	129	9	7	15	15	2	13	0	0	10	0	Posterior Hindbrain	Could not determine	NA	High midline	Global	No	Plxna2	plexin A2	protein coding gene	http://www.informatics.jax.org/gxd/marker/MGI:107684?tab=imagestab#gxd=markerMgiId%3DMGI%3A102764%26theilerStage%3D%26assayType%3D%26results%3D25%26startIndex%3D0%26sort%3D%26dir%3Dasc%26tab%3Dimagestab%26theilerStageFilter%3D12%26theilerStageFilter%3D13%26theilerStageFilter%3D14%26wildtypeFilter%3Dwild%20type
PAX3	0.855433	83.9858	0	0	2.93901	TRUE	0.423297	40.3649	0	0	0.239562	22.8177	1.52888e-115	3.00012e-113	0	842	226	86	29	29	29	2	13	0	0	10	2	Posterior Hindbrain	MB/R1, HB	No	Midline excluded	High lateral	Yes	Pax3	paired box 3	protein coding gene	http://www.informatics.jax.org/gxd/marker/MGI:97487?tab=imagestab#gxd=markerMgiId%3DMGI%3A102764%26theilerStage%3D%26assayType%3D%26results%3D25%26startIndex%3D0%26sort%3D%26dir%3Dasc%26tab%3Dimagestab%26theilerStageFilter%3D12%26theilerStageFilter%3D13%26theilerStageFilter%3D14%26wildtypeFilter%3Dwild%20type
NSG2	0.91891	51.565	0	0	1.99556	TRUE	0.66902	35.1015	3.19694e-270	4.71681e-268	0.138461	7.2485	2.10706e-13	9.46152e-12	10	849	52	22	18	4	9	9	4	4	10	10		Posterior Hindbrain	Could not determine	NA	NA	Could not determine	NA	Nsg2	neuron specific gene family meMB/R1er 2	protein coding gene	http://www.informatics.jax.org/gxd/marker/MGI:1202070?tab=imagestab#gxd=markerMgiId%3DMGI%3A102764%26theilerStage%3D%26assayType%3D%26results%3D25%26startIndex%3D0%26sort%3D%26dir%3Dasc%26tab%3Dimagestab%26theilerStageFilter%3D12%26theilerStageFilter%3D13%26theilerStageFilter%3D14%26wildtypeFilter%3Dwild%20type
NUAK1	0.888487	42.2389	0	0	2.01778	TRUE	0.698766	30.9154	3.7127e-210	4.70027e-208	0.15057	6.63932	1.57566e-11	6.482e-10	0	740	227	9	7	15	15	2	13	0	0	10		Posterior Hindbrain	MB/R1, HB	No	NA	Could not determine	NA	Nuak1	NUAK family, SNF1-like kinase, 1	protein coding gene	http://www.informatics.jax.org/gxd/marker/MGI:1925226?tab=imagestab#gxd=markerMgiId%3DMGI%3A102764%26theilerStage%3D%26assayType%3D%26results%3D25%26startIndex%3D0%26sort%3D%26dir%3Dasc%26tab%3Dimagestab%26theilerStageFilter%3D12%26theilerStageFilter%3D13%26theilerStageFilter%3D14%26wildtypeFilter%3Dwild%20type
GM44783	0.926044	37.5322	0	9.88079e-307	1.20715	TRUE	0.772001	29.1941	1.15196e-187	1.34553e-185	0.16384	6.182	3.16481e-10	1.21771e-08	0	781	227	9	7	15	15	2	13	0	0	10		Posterior Hindbrain	No images	NA	NA	No images	NA	Gm38534	predicted gene, 38534	lncRNA gene	http://www.informatics.jax.org/gxd/marker/MGI:5621419?tab=imagestab#gxd=markerMgiId%3DMGI%3A5621419%26theilerStage%3D%26assayType%3D%26results%3D25%26startIndex%3D0%26sort%3D%26dir%3Dasc%26tab%3Dimagestab%26theilerStageFilter%3D12%26theilerStageFilter%3D13%26theilerStageFilter%3D14%26wildtypeFilter%3Dwild%20type
WNT8A	0.869633	39.1779	0	0	1.1423	TRUE	0.695303	28.8893	8.14249e-184	9.34386e-182	0.130084	5.40266	3.28296e-08	1.11263e-06	10	833	60	2	28	11	11	24	4	4	10	10		Posterior Hindbrain	R4 (Posterior HB)	Yes	NA	Midline excluded	NA	Wnt8a	wingless-type MMTV integration site family, meMB/R1er 8A	protein coding gene	http://www.informatics.jax.org/gxd/marker/MGI:107924?tab=imagestab#gxd=markerMgiId%3DMGI%3A102764%26theilerStage%3D%26assayType%3D%26results%3D25%26startIndex%3D0%26sort%3D%26dir%3Dasc%26tab%3Dimagestab%26theilerStageFilter%3D12%26theilerStageFilter%3D13%26theilerStageFilter%3D14%26wildtypeFilter%3Dwild%20type
TUBB2B	0.849625	37.6428	0	0	3.01909	TRUE	0.652742	27.2056	2.78709e-163	3.07253e-161	0.0362851	1.51129	0.0653577	0.50035	13	271	271	5	48	2	27	27	6	13	13	10		Posterior Hindbrain	No images	NA	NA	No images	NA	Tubb2b	tubulin, beta 2B class IIB	protein coding gene	http://www.informatics.jax.org/gxd/marker/MGI:1920960?tab=imagestab#gxd=markerMgiId%3DMGI%3A102764%26theilerStage%3D%26assayType%3D%26results%3D25%26startIndex%3D0%26sort%3D%26dir%3Dasc%26tab%3Dimagestab%26theilerStageFilter%3D12%26theilerStageFilter%3D13%26theilerStageFilter%3D14%26wildtypeFilter%3Dwild%20type
TSHZ1	0.904736	31.292	3.00231e-215	1.81275e-213	1.585	TRUE	0.779651	25.2872	2.20872e-141	2.23411e-139	0.0839489	2.71598	0.00330399	0.0613029	10	815	60	2	28	11	11	24	4	4	10	10		Posterior Hindbrain	Could not determine	NA	NA	Could not determine	NA	Tshz1	teashirt zinc finger family meMB/R1er 1	protein coding gene	http://www.informatics.jax.org/gxd/marker/MGI:1346031?tab=imagestab#gxd=markerMgiId%3DMGI%3A102764%26theilerStage%3D%26assayType%3D%26results%3D25%26startIndex%3D0%26sort%3D%26dir%3Dasc%26tab%3Dimagestab%26theilerStageFilter%3D12%26theilerStageFilter%3D13%26theilerStageFilter%3D14%26wildtypeFilter%3Dwild%20type
GRIK3	0.849123	25.8215	2.54552e-147	1.26458e-145	1.2264	TRUE	0.715821	20.0913	4.39917e-90	3.59687e-88	0.0644964	1.81069	0.0350944	0.444582	0	560	260	36	5	1	17	17	17	0	0	10		Posterior Hindbrain	HB	Yes	NA	Could not determine	NA	Grik3	glutamate receptor, ionotropic, kainate 3	protein coding gene	http://www.informatics.jax.org/gxd/marker/MGI:95816?tab=imagestab#gxd=markerMgiId%3DMGI%3A102764%26theilerStage%3D%26assayType%3D%26results%3D25%26startIndex%3D0%26sort%3D%26dir%3Dasc%26tab%3Dimagestab%26theilerStageFilter%3D12%26theilerStageFilter%3D13%26theilerStageFilter%3D14%26wildtypeFilter%3Dwild%20type
PCDH8	0.873785	46.2991	0	0	2.0091	TRUE	0.385845	18.984	1.156e-80	8.79229e-79	0.459515	22.6115	1.67038e-113	3.21352e-111	1	779	39	68	68	18	18	3	3	16	1	10	0	Posterior Hindbrain	Could not determine	NA	High midline	Could not determine	NA	Pcdh8	protocadherin 8	protein coding gene	http://www.informatics.jax.org/gxd/marker/MGI:1306800?tab=imagestab#gxd=markerMgiId%3DMGI%3A102764%26theilerStage%3D%26assayType%3D%26results%3D25%26startIndex%3D0%26sort%3D%26dir%3Dasc%26tab%3Dimagestab%26theilerStageFilter%3D12%26theilerStageFilter%3D13%26theilerStageFilter%3D14%26wildtypeFilter%3Dwild%20type
PDGFRA	0.85254	26.3113	7.11264e-153	3.64416e-151	1.65838	TRUE	0.62993	18.8162	2.78304e-79	2.0924e-77	0.0596582	1.77321	0.0380967	0.470171	0	420	198	86	29	29	29	2	13	0	0	10		Posterior Hindbrain	MB/R1, HB	No	NA	Lateral	NA	Pdgfra	platelet derived growth factor receptor, alpha polypeptide	protein coding gene	http://www.informatics.jax.org/gxd/marker/MGI:97530?tab=imagestab#gxd=markerMgiId%3DMGI%3A102764%26theilerStage%3D%26assayType%3D%26results%3D25%26startIndex%3D0%26sort%3D%26dir%3Dasc%26tab%3Dimagestab%26theilerStageFilter%3D12%26theilerStageFilter%3D13%26theilerStageFilter%3D14%26wildtypeFilter%3Dwild%20type
BCL2	0.868603	20.2922	7.5404e-92	2.88431e-90	1.7968	TRUE	0.720331	15.8276	1.0034e-56	6.37208e-55	0.0822392	1.80382	0.0356301	0.449049	0	390	93	36	5	1	17	17	17	0	0	10		Posterior Hindbrain	Could not determine	NA	NA	Could not determine	NA	Bcl2	B cell leukemia/lymphoma 2	protein coding gene	http://www.informatics.jax.org/gxd/marker/MGI:88138?tab=imagestab#gxd=markerMgiId%3DMGI%3A102764%26theilerStage%3D%26assayType%3D%26results%3D25%26startIndex%3D0%26sort%3D%26dir%3Dasc%26tab%3Dimagestab%26theilerStageFilter%3D12%26theilerStageFilter%3D13%26theilerStageFilter%3D14%26wildtypeFilter%3Dwild%20type
AFF1	0.763267	19.3387	1.26951e-83	4.59622e-82	1.66846	TRUE	0.657903	15.664	1.33195e-55	8.35045e-54	0.0869533	2.06363	0.0195262	0.278867	0	596	69	36	5	1	17	17	17	0	0	10		Posterior Hindbrain	No images	NA	NA	No images	NA	Aff1	AF4/FMR2 family, meMB/R1er 1	protein coding gene	http://www.informatics.jax.org/gxd/marker/MGI:1100819?tab=imagestab#gxd=markerMgiId%3DMGI%3A102764%26theilerStage%3D%26assayType%3D%26results%3D25%26startIndex%3D0%26sort%3D%26dir%3Dasc%26tab%3Dimagestab%26theilerStageFilter%3D12%26theilerStageFilter%3D13%26theilerStageFilter%3D14%26wildtypeFilter%3Dwild%20type
CASZ1	0.833844	30.9337	2.10759e-210	1.26475e-208	1.85541	TRUE	0.417623	15.2909	4.39298e-53	2.7023e-51	0.0597587	2.17574	0.0147873	0.223209	0	729	198	86	29	29	29	2	13	0	0	10		Posterior Hindbrain	Posterior HB	Yes	NA	Could not determine	NA	Casz1	castor zinc finger 1	protein coding gene	http://www.informatics.jax.org/gxd/marker/MGI:1196251?tab=imagestab#gxd=markerMgiId%3DMGI%3A102764%26theilerStage%3D%26assayType%3D%26results%3D25%26startIndex%3D0%26sort%3D%26dir%3Dasc%26tab%3Dimagestab%26theilerStageFilter%3D12%26theilerStageFilter%3D13%26theilerStageFilter%3D14%26wildtypeFilter%3Dwild%20type
FHOD3	0.709092	18.8514	1.43157e-79	5.03435e-78	1.99746	TRUE	0.550342	13.6982	5.20201e-43	2.89176e-41	0.116421	2.89248	0.00191105	0.037956	0	308	7	36	5	1	17	17	17	0	0	10		Posterior Hindbrain	Posterior HB	Yes	NA	Midline excluded	NA	Fhod3	formin homology 2 domain containing 3	protein coding gene	http://www.informatics.jax.org/gxd/marker/MGI:1925847?tab=imagestab#gxd=markerMgiId%3DMGI%3A102764%26theilerStage%3D%26assayType%3D%26results%3D25%26startIndex%3D0%26sort%3D%26dir%3Dasc%26tab%3Dimagestab%26theilerStageFilter%3D12%26theilerStageFilter%3D13%26theilerStageFilter%3D14%26wildtypeFilter%3Dwild%20type
FHDC1	0.847991	15.9812	8.64022e-58	2.63681e-56	1.1621	TRUE	0.641766	11.3592	3.33723e-30	1.50198e-28	0.143245	2.5318	0.00567394	0.0990568	0	258	93	36	5	1	17	17	17	0	0	10		Posterior Hindbrain	No images	NA	NA	No images	NA	Fhdc1	FH2 domain containing 1	protein coding gene	http://www.informatics.jax.org/gxd/marker/MGI:2684972?tab=imagestab#gxd=markerMgiId%3DMGI%3A102764%26theilerStage%3D%26assayType%3D%26results%3D25%26startIndex%3D0%26sort%3D%26dir%3Dasc%26tab%3Dimagestab%26theilerStageFilter%3D12%26theilerStageFilter%3D13%26theilerStageFilter%3D14%26wildtypeFilter%3Dwild%20type
FAM84B	0.759127	18.4659	1.94394e-76	6.68055e-75	1.67971	TRUE	0.490408	11.0474	1.12881e-28	4.88977e-27	0.159203	3.58805	0.000166579	0.00392883	0	632	7	36	5	1	17	17	17	0	0	10		Posterior Hindbrain	No images	NA	NA	No images	NA	Lratd2	LRAT domain containing 1	protein coding gene	http://www.informatics.jax.org/gxd/marker/MGI:3026924?tab=imagestab#gxd=markerMgiId%3DMGI%3A3026924%26theilerStage%3D%26assayType%3D%26results%3D25%26startIndex%3D0%26sort%3D%26dir%3Dasc%26tab%3Dimagestab%26theilerStageFilter%3D12%26theilerStageFilter%3D13%26theilerStageFilter%3D14%26wildtypeFilter%3Dwild%20type
AFF3	0.658471	12.9105	1.96497e-38	4.7486e-37	1.60372	TRUE	0.587001	10.8589	9.04948e-28	3.82711e-26	0.0605727	1.11759	0.131872	0.50035	0	199	7	36	5	1	17	17	17	0	0	10		Posterior Hindbrain	No images	NA	NA	No images	NA	Aff3	AF4/FMR2 family, meMB/R1er 3	protein coding gene	http://www.informatics.jax.org/gxd/marker/MGI:106927?tab=imagestab#gxd=markerMgiId%3DMGI%3A102764%26theilerStage%3D%26assayType%3D%26results%3D25%26startIndex%3D0%26sort%3D%26dir%3Dasc%26tab%3Dimagestab%26theilerStageFilter%3D12%26theilerStageFilter%3D13%26theilerStageFilter%3D14%26wildtypeFilter%3Dwild%20type
ACLY	0.85982	12.6077	9.57544e-37	2.24759e-35	2.64083	TRUE	0.786644	10.7568	2.75286e-27	1.14935e-25	0.143366	1.95475	0.0253062	0.343419	0	316	69	36	5	1	17	17	17	0	0	10		Posterior Hindbrain	Could not determine	NA	NA	Could not determine	NA	Acly	ATP citrate lyase	protein coding gene	http://www.informatics.jax.org/gxd/marker/MGI:103251?tab=imagestab#gxd=markerMgiId%3DMGI%3A102764%26theilerStage%3D%26assayType%3D%26results%3D25%26startIndex%3D0%26sort%3D%26dir%3Dasc%26tab%3Dimagestab%26theilerStageFilter%3D12%26theilerStageFilter%3D13%26theilerStageFilter%3D14%26wildtypeFilter%3Dwild%20type
NEDD9	0.914335	60.2316	0	0	1.64711	TRUE	0.177081	10.5747	1.9526e-26	8.01587e-25	0.731884	43.9221	0	0	1	564	43	29	59	24	24	1	10	10	1	10	0	Posterior Hindbrain	No images	NA	High midline	No images	NA	Nedd9	neural precursor cell expressed, developmentally down-regulated gene 9	protein coding gene	http://www.informatics.jax.org/gxd/marker/MGI:97302?tab=imagestab#gxd=markerMgiId%3DMGI%3A102764%26theilerStage%3D%26assayType%3D%26results%3D25%26startIndex%3D0%26sort%3D%26dir%3Dasc%26tab%3Dimagestab%26theilerStageFilter%3D12%26theilerStageFilter%3D13%26theilerStageFilter%3D14%26wildtypeFilter%3Dwild%20type
ITGB8	0.809487	16.1401	6.66755e-59	2.05396e-57	1.68235	TRUE	0.555057	10.2646	5.08888e-25	2.03379e-23	0.0890721	1.64446	0.0500404	0.50035	0	131	67	10	5	1	17	17	17	0	0	10		Posterior Hindbrain	No images	NA	NA	No images	NA	Itgb8	integrin beta 8	protein coding gene	http://www.informatics.jax.org/gxd/marker/MGI:1338035?tab=imagestab#gxd=markerMgiId%3DMGI%3A102764%26theilerStage%3D%26assayType%3D%26results%3D25%26startIndex%3D0%26sort%3D%26dir%3Dasc%26tab%3Dimagestab%26theilerStageFilter%3D12%26theilerStageFilter%3D13%26theilerStageFilter%3D14%26wildtypeFilter%3Dwild%20type
CACNG4	0.864548	20.5594	3.17132e-94	1.23719e-92	2.08877	TRUE	0.457064	10.1273	2.08967e-24	8.20111e-23	0.220303	4.87367	5.47726e-07	1.68465e-05	10	522	105	38	3	11	11	24	4	4	10	10		Posterior Hindbrain	No images	NA	NA	No images	NA	Cacng4	calcium channel, voltage-dependent, gamma subunit 4	protein coding gene	http://www.informatics.jax.org/gxd/marker/MGI:1859167?tab=imagestab#gxd=markerMgiId%3DMGI%3A102764%26theilerStage%3D%26assayType%3D%26results%3D25%26startIndex%3D0%26sort%3D%26dir%3Dasc%26tab%3Dimagestab%26theilerStageFilter%3D12%26theilerStageFilter%3D13%26theilerStageFilter%3D14%26wildtypeFilter%3Dwild%20type
9030622O22RIK	0.936695	149.213	0	0	1.31924	TRUE	0.0683588	9.9397	1.39836e-23	5.40157e-22	0.908346	132.718	0	0	9	0	113	113	27	25	25	25	9	9	9		6	NA	No images	NA	High midline	No images	NA	9030622O22Rik	RIKEN cDNA 9030622O22 gene	lncRNA gene	http://www.informatics.jax.org/gxd/marker/MGI:1918820?tab=imagestab#gxd=markerMgiId%3DMGI%3A102764%26theilerStage%3D%26assayType%3D%26results%3D25%26startIndex%3D0%26sort%3D%26dir%3Dasc%26tab%3Dimagestab%26theilerStageFilter%3D12%26theilerStageFilter%3D13%26theilerStageFilter%3D14%26wildtypeFilter%3Dwild%20type
PLEKHG1	0.885804	40.3619	0	0	1.45883	TRUE	0.239569	9.88545	2.40706e-23	9.20735e-22	0.749412	31.0533	5.14849e-212	1.50789e-209	1	267	293	12	45	24	24	1	10	10	1		0	NA	Global	NA	High midline	Could not determine	NA	Plekhg1	pleckstrin homology domain containing, family G (with RhoGef domain) meMB/R1er 1	protein coding gene	http://www.informatics.jax.org/gxd/marker/MGI:2676551?tab=imagestab#gxd=markerMgiId%3DMGI%3A102764%26theilerStage%3D%26assayType%3D%26results%3D25%26startIndex%3D0%26sort%3D%26dir%3Dasc%26tab%3Dimagestab%26theilerStageFilter%3D12%26theilerStageFilter%3D13%26theilerStageFilter%3D14%26wildtypeFilter%3Dwild%20type
IGFBP5	0.884048	98.099	0	0	3.87935	TRUE	0.0962834	9.86269	3.02036e-23	1.14639e-21	0.695072	71.4929	0	0	9	499	249	47	27	25	25	25	9	9	9		5	NA	Global	NA	High midline	Could not determine	NA	Igfbp5	insulin-like growth factor binding protein 5	protein coding gene	http://www.informatics.jax.org/gxd/marker/MGI:96440?tab=imagestab#gxd=markerMgiId%3DMGI%3A102764%26theilerStage%3D%26assayType%3D%26results%3D25%26startIndex%3D0%26sort%3D%26dir%3Dasc%26tab%3Dimagestab%26theilerStageFilter%3D12%26theilerStageFilter%3D13%26theilerStageFilter%3D14%26wildtypeFilter%3Dwild%20type
APELA	0.9082	80.3459	0	0	1.54977	TRUE	0.12118	9.8516	3.37296e-23	1.27775e-21	0.662662	54.1576	0	0	1	687	44	51	11	30	30	1	10	10	1		6	NA	Global	NA	High midline	Could not determine	NA	Apela	apelin receptor early endogenous ligand	protein coding gene	http://www.informatics.jax.org/gxd/marker/MGI:3642370?tab=imagestab#gxd=markerMgiId%3DMGI%3A102764%26theilerStage%3D%26assayType%3D%26results%3D25%26startIndex%3D0%26sort%3D%26dir%3Dasc%26tab%3Dimagestab%26theilerStageFilter%3D12%26theilerStageFilter%3D13%26theilerStageFilter%3D14%26wildtypeFilter%3Dwild%20type
TEX15	0.7613	18.8865	7.35844e-80	2.59236e-78	1.60518	TRUE	0.41628	9.8128	4.95866e-23	1.86049e-21	0.447852	10.5693	2.06738e-26	1.41847e-24	5	792	91	54	54	3	13	13	2	5	5		1	NA	No images	NA	High lateral	No images	NA	Tex15	testis expressed gene 15	protein coding gene	http://www.informatics.jax.org/gxd/marker/MGI:1934816?tab=imagestab#gxd=markerMgiId%3DMGI%3A102764%26theilerStage%3D%26assayType%3D%26results%3D25%26startIndex%3D0%26sort%3D%26dir%3Dasc%26tab%3Dimagestab%26theilerStageFilter%3D12%26theilerStageFilter%3D13%26theilerStageFilter%3D14%26wildtypeFilter%3Dwild%20type
FAM13C	0.837472	24.7428	1.8536e-135	8.82844e-134	1.64374	TRUE	0.360039	9.64292	2.63348e-22	9.78729e-21	0.535497	14.3981	2.65774e-47	2.58182e-45	1	510	94	11	13	18	18	3	3	16	1		0	NA	No images	NA	High midline	No images	NA	Fam13c	family with sequence similarity 13, meMB/R1er C	protein coding gene	http://www.informatics.jax.org/gxd/marker/MGI:1918971?tab=imagestab#gxd=markerMgiId%3DMGI%3A102764%26theilerStage%3D%26assayType%3D%26results%3D25%26startIndex%3D0%26sort%3D%26dir%3Dasc%26tab%3Dimagestab%26theilerStageFilter%3D12%26theilerStageFilter%3D13%26theilerStageFilter%3D14%26wildtypeFilter%3Dwild%20type
FHAD1	0.891575	23.4808	3.20664e-122	1.45657e-120	1.03955	TRUE	0.400594	9.61817	3.35048e-22	1.24284e-20	0.470227	11.3224	5.0806e-30	3.80521e-28	0	664	119	10	5	1	17	17	17	0	0		0	NA	No images	NA	High midline	No images	NA	Fhad1	forkhead-associated (FHA) phosphopeptide binding domain 1	protein coding gene	http://www.informatics.jax.org/gxd/marker/MGI:1920323?tab=imagestab#gxd=markerMgiId%3DMGI%3A102764%26theilerStage%3D%26assayType%3D%26results%3D25%26startIndex%3D0%26sort%3D%26dir%3Dasc%26tab%3Dimagestab%26theilerStageFilter%3D12%26theilerStageFilter%3D13%26theilerStageFilter%3D14%26wildtypeFilter%3Dwild%20type
HSD11B2	0.923697	101.982	0	0	2.41971	TRUE	0.0927455	9.44846	1.71918e-21	6.27055e-20	0.869293	89.0151	0	0	9	706	127	15	31	25	25	25	9	9	9		5	NA	No images	NA	High midline	No images	NA	Hsd11b2	hydroxysteroid 11-beta dehydrogenase 2	protein coding gene	http://www.informatics.jax.org/gxd/marker/MGI:104720?tab=imagestab#gxd=markerMgiId%3DMGI%3A102764%26theilerStage%3D%26assayType%3D%26results%3D25%26startIndex%3D0%26sort%3D%26dir%3Dasc%26tab%3Dimagestab%26theilerStageFilter%3D12%26theilerStageFilter%3D13%26theilerStageFilter%3D14%26wildtypeFilter%3Dwild%20type
COBL	0.926956	166.858	0	0	1.6995	TRUE	0.0562728	9.22357	1.43681e-20	5.11699e-19	0.904364	149.159	0	0	9	0	113	113	27	25	25	25	9	9	9		6	NA	Global	NA	High midline	Midline	Yes	Cobl	cordon-bleu WH2 repeat	protein coding gene	http://www.informatics.jax.org/gxd/marker/MGI:105056?tab=imagestab#gxd=markerMgiId%3DMGI%3A102764%26theilerStage%3D%26assayType%3D%26results%3D25%26startIndex%3D0%26sort%3D%26dir%3Dasc%26tab%3Dimagestab%26theilerStageFilter%3D12%26theilerStageFilter%3D13%26theilerStageFilter%3D14%26wildtypeFilter%3Dwild%20type
TRABD2B	0.89211	45.993	0	0	1.60183	TRUE	0.194349	9.09092	4.91023e-20	1.73298e-18	0.735347	34.5962	1.44061e-262	5.23501e-260	1	745	0	29	59	24	24	1	10	10	1		0	NA	Could not determine	NA	High midline	Could not determine	NA	Trabd2b	TraB domain containing 2B	protein coding gene	http://www.informatics.jax.org/gxd/marker/MGI:3650152?tab=imagestab#gxd=markerMgiId%3DMGI%3A102764%26theilerStage%3D%26assayType%3D%26results%3D25%26startIndex%3D0%26sort%3D%26dir%3Dasc%26tab%3Dimagestab%26theilerStageFilter%3D12%26theilerStageFilter%3D13%26theilerStageFilter%3D14%26wildtypeFilter%3Dwild%20type
NTF3	0.829607	20.5026	1.02064e-93	3.95811e-92	1.42445	TRUE	0.388687	9.039	7.90587e-20	2.77526e-18	0.516348	12.0525	9.41001e-34	7.53684e-32	5	341	91	54	54	3	13	13	2	5	5		1	NA	No images	NA	High lateral	No images	NA	Ntf3	neurotrophin 3	protein coding gene	http://www.informatics.jax.org/gxd/marker/MGI:97380?tab=imagestab#gxd=markerMgiId%3DMGI%3A102764%26theilerStage%3D%26assayType%3D%26results%3D25%26startIndex%3D0%26sort%3D%26dir%3Dasc%26tab%3Dimagestab%26theilerStageFilter%3D12%26theilerStageFilter%3D13%26theilerStageFilter%3D14%26wildtypeFilter%3Dwild%20type
DACH2	0.839942	20.2389	2.22375e-91	8.45671e-90	1.36248	TRUE	0.386141	8.61849	3.39221e-18	1.13982e-16	0.499432	11.1094	5.6439e-29	4.11711e-27	0	207	54	82	10	43	7	15	15	15	0		3	NA	HB	NA	NA	Midline excluded	NA	Dach2	dachshund family transcription factor 2	protein coding gene	http://www.informatics.jax.org/gxd/marker/MGI:1890446?tab=imagestab#gxd=markerMgiId%3DMGI%3A102764%26theilerStage%3D%26assayType%3D%26results%3D25%26startIndex%3D0%26sort%3D%26dir%3Dasc%26tab%3Dimagestab%26theilerStageFilter%3D12%26theilerStageFilter%3D13%26theilerStageFilter%3D14%26wildtypeFilter%3Dwild%20type
ID1	0.818988	27.4074	1.11954e-165	5.93752e-164	3.72662	TRUE	0.256547	8.2917	5.5819e-17	1.79858e-15	0.387532	12.5275	2.64055e-36	2.18631e-34	8	512	248	98	51	0	3	8	8	8	8		2	NA	Could not determine	NA	Midline excluded	Could not determine	NA	Id1	inhibitor of DNA binding 1, HLH protein	protein coding gene	http://www.informatics.jax.org/gxd/marker/MGI:96396?tab=imagestab#gxd=markerMgiId%3DMGI%3A102764%26theilerStage%3D%26assayType%3D%26results%3D25%26startIndex%3D0%26sort%3D%26dir%3Dasc%26tab%3Dimagestab%26theilerStageFilter%3D12%26theilerStageFilter%3D13%26theilerStageFilter%3D14%26wildtypeFilter%3Dwild%20type
WNT3A	0.784855	21.7218	6.38761e-105	2.66123e-103	1.07465	TRUE	0.296061	8.16445	1.61446e-16	5.12632e-15	0.415602	11.4567	1.08834e-30	8.24575e-29	8	270	118	98	51	0	3	8	8	8	8		1	NA	MB/R1, HB	NA	High lateral	Lateral	Yes	Wnt3a	wingless-type MMTV integration site family, meMB/R1er 3A	protein coding gene	http://www.informatics.jax.org/gxd/marker/MGI:98956?tab=imagestab#gxd=markerMgiId%3DMGI%3A102764%26theilerStage%3D%26assayType%3D%26results%3D25%26startIndex%3D0%26sort%3D%26dir%3Dasc%26tab%3Dimagestab%26theilerStageFilter%3D12%26theilerStageFilter%3D13%26theilerStageFilter%3D14%26wildtypeFilter%3Dwild%20type
TRIB2	0.894364	36.935	6.34814e-299	4.51339e-297	1.77773	TRUE	0.213559	8.1027	2.68753e-16	8.50603e-15	0.686179	26.1056	1.5762e-150	3.59649e-148	1	281	44	51	11	30	30	1	10	10	1		6	NA	No images	NA	High midline	No images	NA	Trib2	tribbles pseudokinase 2	protein coding gene	http://www.informatics.jax.org/gxd/marker/MGI:2145021?tab=imagestab#gxd=markerMgiId%3DMGI%3A102764%26theilerStage%3D%26assayType%3D%26results%3D25%26startIndex%3D0%26sort%3D%26dir%3Dasc%26tab%3Dimagestab%26theilerStageFilter%3D12%26theilerStageFilter%3D13%26theilerStageFilter%3D14%26wildtypeFilter%3Dwild%20type
POU6F2	0.900449	44.2487	0	0	1.50174	TRUE	0.177623	7.87695	1.67733e-15	5.14286e-14	0.710778	31.7294	3.05926e-221	9.23566e-219	1	552	0	29	59	24	24	1	10	10	1		0	NA	No images	NA	High midline	No images	NA	Pou6f2	POU domain, class 6, transcription factor 2	protein coding gene	http://www.informatics.jax.org/gxd/marker/MGI:2443631?tab=imagestab#gxd=markerMgiId%3DMGI%3A102764%26theilerStage%3D%26assayType%3D%26results%3D25%26startIndex%3D0%26sort%3D%26dir%3Dasc%26tab%3Dimagestab%26theilerStageFilter%3D12%26theilerStageFilter%3D13%26theilerStageFilter%3D14%26wildtypeFilter%3Dwild%20type
PLCD4	0.8927	21.5533	2.46637e-103	1.01463e-101	1.04447	TRUE	0.349528	7.67492	8.27627e-15	2.49088e-13	0.574508	12.6732	4.16106e-37	3.53474e-35	1	576	179	11	13	18	18	3	3	16	1		0	NA	No images	NA	High midline	No images	NA	Plcd4	phospholipase C, delta 4	protein coding gene	http://www.informatics.jax.org/gxd/marker/MGI:107469?tab=imagestab#gxd=markerMgiId%3DMGI%3A102764%26theilerStage%3D%26assayType%3D%26results%3D25%26startIndex%3D0%26sort%3D%26dir%3Dasc%26tab%3Dimagestab%26theilerStageFilter%3D12%26theilerStageFilter%3D13%26theilerStageFilter%3D14%26wildtypeFilter%3Dwild%20type
METRNL	0.900686	124.256	0	0	1.32708	TRUE	0.0598165	7.35186	9.77327e-14	2.84964e-12	0.801919	99.1481	0	0	1	840	43	29	59	24	24	1	10	10	1		0	NA	No images	NA	High midline	No images	NA	Metrnl	meteorin, glial cell differentiation regulator-like	protein coding gene	http://www.informatics.jax.org/gxd/marker/MGI:2384806?tab=imagestab#gxd=markerMgiId%3DMGI%3A102764%26theilerStage%3D%26assayType%3D%26results%3D25%26startIndex%3D0%26sort%3D%26dir%3Dasc%26tab%3Dimagestab%26theilerStageFilter%3D12%26theilerStageFilter%3D13%26theilerStageFilter%3D14%26wildtypeFilter%3Dwild%20type
NFIA	0.83303	21.9905	1.77437e-107	7.43983e-106	1.06035	TRUE	0.310534	7.31154	1.32047e-13	3.83875e-12	0.559796	13.2936	1.26091e-40	1.12467e-38	1	526	179	11	13	18	18	3	3	16	1		0	NA	No images	NA	High midline	No images	NA	Nfia	nuclear factor I/A	protein coding gene	http://www.informatics.jax.org/gxd/marker/MGI:108056?tab=imagestab#gxd=markerMgiId%3DMGI%3A102764%26theilerStage%3D%26assayType%3D%26results%3D25%26startIndex%3D0%26sort%3D%26dir%3Dasc%26tab%3Dimagestab%26theilerStageFilter%3D12%26theilerStageFilter%3D13%26theilerStageFilter%3D14%26wildtypeFilter%3Dwild%20type
ZFHX4	0.739351	21.9964	1.55933e-107	6.5522e-106	2.22344	TRUE	0.250237	7.04992	8.95119e-13	2.53097e-11	0.465127	13.1176	1.30551e-39	1.14879e-37	5	855	101	54	54	3	13	13	2	5	5		2	NA	No images	NA	Midline excluded	No images	NA	Zfhx4	zinc finger homeodomain 4	protein coding gene	http://www.informatics.jax.org/gxd/marker/MGI:2137668?tab=imagestab#gxd=markerMgiId%3DMGI%3A102764%26theilerStage%3D%26assayType%3D%26results%3D25%26startIndex%3D0%26sort%3D%26dir%3Dasc%26tab%3Dimagestab%26theilerStageFilter%3D12%26theilerStageFilter%3D13%26theilerStageFilter%3D14%26wildtypeFilter%3Dwild%20type
NKX2-2	0.893559	39.8808	0	0	1.30435	TRUE	0.165741	6.99383	1.33738e-12	3.75442e-11	0.641255	27.1606	9.48989e-163	2.24362e-160	1	587	30	3	32	30	30	1	10	10	1		4	NA	FB, HB	NA	High midline	Midline	Yes	Nkx2-2	NK2 homeobox 2	protein coding gene	http://www.informatics.jax.org/gxd/marker/MGI:97347?tab=imagestab#gxd=markerMgiId%3DMGI%3A102764%26theilerStage%3D%26assayType%3D%26results%3D25%26startIndex%3D0%26sort%3D%26dir%3Dasc%26tab%3Dimagestab%26theilerStageFilter%3D12%26theilerStageFilter%3D13%26theilerStageFilter%3D14%26wildtypeFilter%3Dwild%20type
NOG	0.765633	19.8155	1.09479e-87	4.03817e-86	1.54228	TRUE	0.266843	6.92284	2.21341e-12	6.1347e-11	0.506799	13.1702	6.5104e-40	5.7807e-38	8	300	12	106	51	0	3	8	8	8	8		1	NA	FB, MB/R1, posterior HB	NA	High lateral	Lateral	Yes	Nog	noggin	protein coding gene	http://www.informatics.jax.org/gxd/marker/MGI:104327?tab=imagestab#gxd=markerMgiId%3DMGI%3A102764%26theilerStage%3D%26assayType%3D%26results%3D25%26startIndex%3D0%26sort%3D%26dir%3Dasc%26tab%3Dimagestab%26theilerStageFilter%3D12%26theilerStageFilter%3D13%26theilerStageFilter%3D14%26wildtypeFilter%3Dwild%20type
SP8	0.82578	26.9431	3.43952e-160	1.79029e-158	2.39581	TRUE	0.220559	6.76649	6.59741e-12	1.79061e-10	0.459985	14.1438	1.02018e-45	9.57845e-44	2	232	150	34	70	13	8	18	18	2	2		2	NA	FB, MB/R1, HB	NA	Midline excluded	Midline excluded	Yes	Sp8	trans-acting transcription factor 8	protein coding gene	http://www.informatics.jax.org/gxd/marker/MGI:2443471?tab=imagestab#gxd=markerMgiId%3DMGI%3A102764%26theilerStage%3D%26assayType%3D%26results%3D25%26startIndex%3D0%26sort%3D%26dir%3Dasc%26tab%3Dimagestab%26theilerStageFilter%3D12%26theilerStageFilter%3D13%26theilerStageFilter%3D14%26wildtypeFilter%3Dwild%20type
ZIC1	0.783555	34.9091	2.70433e-267	1.81116e-265	2.29173	TRUE	0.151098	6.71675	9.29142e-12	2.51137e-10	0.424951	18.9364	2.8587e-80	4.06494e-78	8	654	118	98	51	0	3	8	8	8	8		1	NA	Global	NA	High lateral	Lateral	Yes	Zic1	zinc finger protein of the cerebellum 1	protein coding gene	http://www.informatics.jax.org/gxd/marker/MGI:106683?tab=imagestab#gxd=markerMgiId%3DMGI%3A102764%26theilerStage%3D%26assayType%3D%26results%3D25%26startIndex%3D0%26sort%3D%26dir%3Dasc%26tab%3Dimagestab%26theilerStageFilter%3D12%26theilerStageFilter%3D13%26theilerStageFilter%3D14%26wildtypeFilter%3Dwild%20type
PTH1R	0.88418	25.3022	1.50885e-141	7.34694e-140	1.6886	TRUE	0.247441	6.6163	1.84151e-11	4.87664e-10	0.625652	16.7669	2.13004e-63	2.54864e-61	1	751	68	53	33	33	33	3	3	16	1		5	NA	Could not determine	NA	High midline	Could not determine	NA	Pth1r	parathyroid hormone 1 receptor	protein coding gene	http://www.informatics.jax.org/gxd/marker/MGI:97801?tab=imagestab#gxd=markerMgiId%3DMGI%3A102764%26theilerStage%3D%26assayType%3D%26results%3D25%26startIndex%3D0%26sort%3D%26dir%3Dasc%26tab%3Dimagestab%26theilerStageFilter%3D12%26theilerStageFilter%3D13%26theilerStageFilter%3D14%26wildtypeFilter%3Dwild%20type
DKK2	0.876943	66.3523	0	0	1.08612	TRUE	0.0936085	6.41792	6.90745e-11	1.79292e-09	0.828121	56.819	0	0	1	826	194	12	45	24	24	1	10	10	1		0	NA	Could not determine	NA	High midline	Could not determine	NA	Dkk2	dickkopf WNT signaling pathway inhibitor 2	protein coding gene	http://www.informatics.jax.org/gxd/marker/MGI:1890663?tab=imagestab#gxd=markerMgiId%3DMGI%3A102764%26theilerStage%3D%26assayType%3D%26results%3D25%26startIndex%3D0%26sort%3D%26dir%3Dasc%26tab%3Dimagestab%26theilerStageFilter%3D12%26theilerStageFilter%3D13%26theilerStageFilter%3D14%26wildtypeFilter%3Dwild%20type
CXXC4	0.849894	23.7563	4.73193e-125	2.17458e-123	2.09423	TRUE	0.245887	6.40436	7.55028e-11	1.95461e-09	0.516589	13.471	1.15878e-41	1.05762e-39	1	349	125	51	11	30	30	1	10	10	1		5	NA	No images	NA	High midline	No images	NA	Cxxc4	CXXC finger 4	protein coding gene	http://www.informatics.jax.org/gxd/marker/MGI:2442112?tab=imagestab#gxd=markerMgiId%3DMGI%3A102764%26theilerStage%3D%26assayType%3D%26results%3D25%26startIndex%3D0%26sort%3D%26dir%3Dasc%26tab%3Dimagestab%26theilerStageFilter%3D12%26theilerStageFilter%3D13%26theilerStageFilter%3D14%26wildtypeFilter%3Dwild%20type
PID1	0.887375	33.5427	5.75088e-247	3.67588e-245	1.40147	TRUE	0.182399	6.36605	9.69817e-11	2.50404e-09	0.733079	25.6978	6.18973e-146	1.36473e-143	9	785	126	52	43	14	14	14	9	9	9		5	NA	No images	NA	High midline	No images	NA	Pid1	phosphotyrosine interaction domain containing 1	protein coding gene	http://www.informatics.jax.org/gxd/marker/MGI:2138391?tab=imagestab#gxd=markerMgiId%3DMGI%3A102764%26theilerStage%3D%26assayType%3D%26results%3D25%26startIndex%3D0%26sort%3D%26dir%3Dasc%26tab%3Dimagestab%26theilerStageFilter%3D12%26theilerStageFilter%3D13%26theilerStageFilter%3D14%26wildtypeFilter%3Dwild%20type
PTCH1	0.900813	90.2441	0	0	3.41148	TRUE	0.0652798	6.16233	3.58414e-10	8.9938e-09	0.816213	77.3049	0	0	9	801	124	15	31	25	25	25	9	9	9		4	NA	Global	NA	High midline	Midline	Yes	Ptch1	patched 1	protein coding gene	http://www.informatics.jax.org/gxd/marker/MGI:105373?tab=imagestab#gxd=markerMgiId%3DMGI%3A102764%26theilerStage%3D%26assayType%3D%26results%3D25%26startIndex%3D0%26sort%3D%26dir%3Dasc%26tab%3Dimagestab%26theilerStageFilter%3D12%26theilerStageFilter%3D13%26theilerStageFilter%3D14%26wildtypeFilter%3Dwild%20type
OLFML3	0.887974	19.8434	6.2842e-88	2.32669e-86	1.56834	TRUE	0.296859	6.04345	7.54275e-10	1.84668e-08	0.522099	10.679	6.38256e-27	4.41003e-25	1	312	26	78	13	18	18	3	3	16	1		0	NA	No images	NA	High midline	No images	NA	Olfml3	olfactomedin-like 3	protein coding gene	http://www.informatics.jax.org/gxd/marker/MGI:1914877?tab=imagestab#gxd=markerMgiId%3DMGI%3A102764%26theilerStage%3D%26assayType%3D%26results%3D25%26startIndex%3D0%26sort%3D%26dir%3Dasc%26tab%3Dimagestab%26theilerStageFilter%3D12%26theilerStageFilter%3D13%26theilerStageFilter%3D14%26wildtypeFilter%3Dwild%20type
SEMA3E	0.912607	143.248	0	0	1.35311	TRUE	0.0427567	6.00683	9.45919e-10	2.30581e-08	0.828229	117.443	0	0	9	856	158	47	27	25	25	25	9	9	9		0	NA	No images	NA	High midline	No images	NA	Sema3e	sema domain, immunoglobulin domain (Ig), short basic domain, secreted, (semaphorin) 3E	protein coding gene	http://www.informatics.jax.org/gxd/marker/MGI:1340034?tab=imagestab#gxd=markerMgiId%3DMGI%3A102764%26theilerStage%3D%26assayType%3D%26results%3D25%26startIndex%3D0%26sort%3D%26dir%3Dasc%26tab%3Dimagestab%26theilerStageFilter%3D12%26theilerStageFilter%3D13%26theilerStageFilter%3D14%26wildtypeFilter%3Dwild%20type
LIFR	0.904517	41.792	0	0	1.47725	TRUE	0.139524	5.92755	1.53744e-09	3.69721e-08	0.808174	34.5025	3.67288e-261	1.31042e-258	1	773	0	29	59	24	24	1	10	10	1		6	NA	Could not determine	NA	High midline	Could not determine	NA	Lifr	LIF receptor alpha	protein coding gene	http://www.informatics.jax.org/gxd/marker/MGI:96788?tab=imagestab#gxd=markerMgiId%3DMGI%3A102764%26theilerStage%3D%26assayType%3D%26results%3D25%26startIndex%3D0%26sort%3D%26dir%3Dasc%26tab%3Dimagestab%26theilerStageFilter%3D12%26theilerStageFilter%3D13%26theilerStageFilter%3D14%26wildtypeFilter%3Dwild%20type
RBM24	0.829167	22.736	9.88023e-115	4.36666e-113	1.56537	TRUE	0.230975	5.83351	2.71366e-09	6.47025e-08	0.491339	12.4466	7.29684e-36	6.01621e-34	4	208	112	58	26	7	0	4	19	1	4		6	NA	No images	NA	High midline	No images	NA	Rbm24	RNA binding motif protein 24	protein coding gene	http://www.informatics.jax.org/gxd/marker/MGI:3610364?tab=imagestab#gxd=markerMgiId%3DMGI%3A102764%26theilerStage%3D%26assayType%3D%26results%3D25%26startIndex%3D0%26sort%3D%26dir%3Dasc%26tab%3Dimagestab%26theilerStageFilter%3D12%26theilerStageFilter%3D13%26theilerStageFilter%3D14%26wildtypeFilter%3Dwild%20type
LMX1A	0.78534	19.5568	1.80562e-85	6.63514e-84	1.22692	TRUE	0.237403	5.82172	2.91229e-09	6.91864e-08	0.516248	12.6654	4.59936e-37	3.89023e-35	8	480	8	23	47	0	3	8	8	8	8		0	NA	MB/R1, HB	NA	High midline	Strong midline, weak lateral	Yes	Lmx1a	LIM homeobox transcription factor 1 alpha	protein coding gene	http://www.informatics.jax.org/gxd/marker/MGI:1888519?tab=imagestab#gxd=markerMgiId%3DMGI%3A102764%26theilerStage%3D%26assayType%3D%26results%3D25%26startIndex%3D0%26sort%3D%26dir%3Dasc%26tab%3Dimagestab%26theilerStageFilter%3D12%26theilerStageFilter%3D13%26theilerStageFilter%3D14%26wildtypeFilter%3Dwild%20type
AMOT	0.83652	28.9232	3.05285e-184	1.7116e-182	2.07161	TRUE	0.178159	5.80309	3.25514e-09	7.67736e-08	0.641754	20.9938	3.73259e-98	6.26023e-96	9	247	2	52	43	14	14	14	9	9	9		4	NA	No images	NA	High midline	No images	NA	Amot	angiomotin	protein coding gene	http://www.informatics.jax.org/gxd/marker/MGI:108440?tab=imagestab#gxd=markerMgiId%3DMGI%3A102764%26theilerStage%3D%26assayType%3D%26results%3D25%26startIndex%3D0%26sort%3D%26dir%3Dasc%26tab%3Dimagestab%26theilerStageFilter%3D12%26theilerStageFilter%3D13%26theilerStageFilter%3D14%26wildtypeFilter%3Dwild%20type
FAM19A1	0.907722	123.222	0	0	1.47976	TRUE	0.0455075	5.54373	1.48052e-08	3.34703e-07	0.817821	100.247	0	0	9	535	158	47	27	25	25	25	9	9	9		0	NA	No images	NA	High midline	No images	NA	Tafa1	TAFA chemokine like family meMB/R1er 1	protein coding gene	http://www.informatics.jax.org/gxd/marker/MGI:2443695?tab=imagestab#gxd=markerMgiId%3DMGI%3A2443695%26theilerStage%3D%26assayType%3D%26results%3D25%26startIndex%3D0%26sort%3D%26dir%3Dasc%26tab%3Dimagestab%26theilerStageFilter%3D12%26theilerStageFilter%3D13%26theilerStageFilter%3D14%26wildtypeFilter%3Dwild%20type
PEG3	0.825013	34.2494	2.2222e-257	1.4633e-255	3.47766	TRUE	0.144751	5.52304	1.6659e-08	3.74884e-07	0.643434	24.662	1.36869e-134	2.88793e-132	1	413	18	12	45	24	24	1	10	10	1		0	NA	No images	NA	High midline	No images	NA	Peg3	paternally expressed 3	protein coding gene	http://www.informatics.jax.org/gxd/marker/MGI:104748?tab=imagestab#gxd=markerMgiId%3DMGI%3A102764%26theilerStage%3D%26assayType%3D%26results%3D25%26startIndex%3D0%26sort%3D%26dir%3Dasc%26tab%3Dimagestab%26theilerStageFilter%3D12%26theilerStageFilter%3D13%26theilerStageFilter%3D14%26wildtypeFilter%3Dwild%20type
FLRT2	0.87033	29.1446	4.88941e-187	2.75704e-185	1.16105	TRUE	0.180197	5.51522	1.74176e-08	3.91058e-07	0.704678	21.6353	4.18341e-104	7.39559e-102	9	594	126	52	43	14	14	14	9	9	9		6	NA	MB/R1	NA	High midline	Could not determine	NA	Flrt2	fibronectin leucine rich transmeMB/R1rane protein 2	protein coding gene	http://www.informatics.jax.org/gxd/marker/MGI:3603594?tab=imagestab#gxd=markerMgiId%3DMGI%3A102764%26theilerStage%3D%26assayType%3D%26results%3D25%26startIndex%3D0%26sort%3D%26dir%3Dasc%26tab%3Dimagestab%26theilerStageFilter%3D12%26theilerStageFilter%3D13%26theilerStageFilter%3D14%26wildtypeFilter%3Dwild%20type
A830018L16RIK	0.881231	35.6293	2.46417e-278	1.70262e-276	1.47087	TRUE	0.149984	5.45179	2.4933e-08	5.51589e-07	0.784628	28.6905	2.50295e-181	6.37863e-179	1	722	194	12	45	24	24	1	10	10	1		0	NA	No images	NA	High midline	No images	NA	A830018L16Rik	RIKEN cDNA A830018L16 gene	protein coding gene	http://www.informatics.jax.org/gxd/marker/MGI:2444149?tab=imagestab#gxd=markerMgiId%3DMGI%3A102764%26theilerStage%3D%26assayType%3D%26results%3D25%26startIndex%3D0%26sort%3D%26dir%3Dasc%26tab%3Dimagestab%26theilerStageFilter%3D12%26theilerStageFilter%3D13%26theilerStageFilter%3D14%26wildtypeFilter%3Dwild%20type
SELENOP	0.860054	63.1665	0	0	1.81886	TRUE	0.0808742	5.42054	2.97096e-08	6.53577e-07	0.355074	23.8952	1.71917e-126	3.5141e-124	1	717	30	3	32	30	30	1	10	10	1		5	NA	Global	NA	High midline	Midline excluded	No	Selenop	selenoprotein P	protein coding gene	http://www.informatics.jax.org/gxd/marker/MGI:894288?tab=imagestab#gxd=markerMgiId%3DMGI%3A102764%26theilerStage%3D%26assayType%3D%26results%3D25%26startIndex%3D0%26sort%3D%26dir%3Dasc%26tab%3Dimagestab%26theilerStageFilter%3D12%26theilerStageFilter%3D13%26theilerStageFilter%3D14%26wildtypeFilter%3Dwild%20type
UTRN	0.816128	40.2497	0	0	2.11154	TRUE	0.118653	5.36302	4.0921e-08	8.96196e-07	0.655746	29.785	3.05312e-195	8.32102e-193	1	697	0	29	59	24	24	1	10	10	1		0	NA	No images	NA	High midline	No images	NA	Utrn	utrophin	protein coding gene	http://www.informatics.jax.org/gxd/marker/MGI:104631?tab=imagestab#gxd=markerMgiId%3DMGI%3A102764%26theilerStage%3D%26assayType%3D%26results%3D25%26startIndex%3D0%26sort%3D%26dir%3Dasc%26tab%3Dimagestab%26theilerStageFilter%3D12%26theilerStageFilter%3D13%26theilerStageFilter%3D14%26wildtypeFilter%3Dwild%20type
CPLX2	0.873894	31.068	3.26334e-212	1.96431e-210	1.76167	TRUE	0.164089	5.25313	7.47662e-08	1.61579e-06	0.487127	15.6624	1.3675e-55	1.47442e-53	1	555	28	117	11	30	30	1	10	10	1		0	NA	No images	NA	High midline	No images	NA	Cplx2	complexin 2	protein coding gene	http://www.informatics.jax.org/gxd/marker/MGI:104726?tab=imagestab#gxd=markerMgiId%3DMGI%3A102764%26theilerStage%3D%26assayType%3D%26results%3D25%26startIndex%3D0%26sort%3D%26dir%3Dasc%26tab%3Dimagestab%26theilerStageFilter%3D12%26theilerStageFilter%3D13%26theilerStageFilter%3D14%26wildtypeFilter%3Dwild%20type
WFIKKN1	0.746412	13.5362	4.778e-42	1.21135e-40	1.29345	TRUE	0.295963	5.08364	1.85135e-07	3.90216e-06	0.586733	10.1011	2.73027e-24	1.79785e-22	5	182	91	54	54	3	13	13	2	5	5		1	NA	No images	NA	High lateral	No images	NA	Wfikkn1	WAP, FS, Ig, KU, and NTR-containing protein 1	protein coding gene	http://www.informatics.jax.org/gxd/marker/MGI:2670967?tab=imagestab#gxd=markerMgiId%3DMGI%3A102764%26theilerStage%3D%26assayType%3D%26results%3D25%26startIndex%3D0%26sort%3D%26dir%3Dasc%26tab%3Dimagestab%26theilerStageFilter%3D12%26theilerStageFilter%3D13%26theilerStageFilter%3D14%26wildtypeFilter%3Dwild%20type
SLIT3	0.918952	79.622	0	0	2.00909	TRUE	0.0640831	5.04286	2.29318e-07	4.80246e-06	0.83061	65.7093	0	0	9	803	158	47	27	25	25	25	9	9	9		6	NA	Global	NA	High midline	Strong midline, weak lateral in FB	Yes	Slit3	slit guidance ligand 3	protein coding gene	http://www.informatics.jax.org/gxd/marker/MGI:1315202?tab=imagestab#gxd=markerMgiId%3DMGI%3A102764%26theilerStage%3D%26assayType%3D%26results%3D25%26startIndex%3D0%26sort%3D%26dir%3Dasc%26tab%3Dimagestab%26theilerStageFilter%3D12%26theilerStageFilter%3D13%26theilerStageFilter%3D14%26wildtypeFilter%3Dwild%20type
FAM46A	0.887168	48.5374	0	0	1.23829	TRUE	0.0952905	4.72766	1.13561e-06	2.21072e-05	0.825644	41.0723	0	0	1	827	194	12	45	24	24	1	10	10	1		0	NA	No images	NA	High midline	No images	NA	Tent5a	terminal nucleotidyltransferase 5A	protein coding gene	http://www.informatics.jax.org/gxd/marker/MGI:2670964?tab=imagestab#gxd=markerMgiId%3DMGI%3A2670964%26theilerStage%3D%26assayType%3D%26results%3D25%26startIndex%3D0%26sort%3D%26dir%3Dasc%26tab%3Dimagestab%26theilerStageFilter%3D12%26theilerStageFilter%3D13%26theilerStageFilter%3D14%26wildtypeFilter%3Dwild%20type
CRABP2	0.757741	24.6341	2.72342e-134	1.28775e-132	4.21893	TRUE	0.155539	4.70526	1.26771e-06	2.45814e-05	0.568059	17.2264	8.42066e-67	1.05922e-64	8	767	191	95	37	37	3	8	8	8	8		2	NA	MB/R1, HB	NA	Midline excluded	Midline excluded	Yes	Crabp2	cellular retinoic acid binding protein II	protein coding gene	http://www.informatics.jax.org/gxd/marker/MGI:88491?tab=imagestab#gxd=markerMgiId%3DMGI%3A102764%26theilerStage%3D%26assayType%3D%26results%3D25%26startIndex%3D0%26sort%3D%26dir%3Dasc%26tab%3Dimagestab%26theilerStageFilter%3D12%26theilerStageFilter%3D13%26theilerStageFilter%3D14%26wildtypeFilter%3Dwild%20type
KLHDC8B	0.872777	20.6698	3.23917e-95	1.26618e-93	1.20439	TRUE	0.201759	4.3117	8.10013e-06	0.000145825	0.789147	16.9512	9.43586e-65	1.15725e-62	1	670	293	12	45	24	24	1	10	10	1		0	NA	No images	NA	High midline	No images	NA	Klhdc8b	kelch domain containing 8B	protein coding gene	http://www.informatics.jax.org/gxd/marker/MGI:1925517?tab=imagestab#gxd=markerMgiId%3DMGI%3A102764%26theilerStage%3D%26assayType%3D%26results%3D25%26startIndex%3D0%26sort%3D%26dir%3Dasc%26tab%3Dimagestab%26theilerStageFilter%3D12%26theilerStageFilter%3D13%26theilerStageFilter%3D14%26wildtypeFilter%3Dwild%20type
DBX1	0.836867	36.6709	1.0619e-294	7.52266e-293	1.73585	TRUE	0.104323	4.29415	8.76803e-06	0.00015756	0.416042	17.2175	9.81939e-67	1.2273e-64	4	465	232	58	26	7	0	4	19	1	4		3	NA	No images	NA	NA	No images	NA	Dbx1	developing brain homeobox 1	protein coding gene	http://www.informatics.jax.org/gxd/marker/MGI:94867?tab=imagestab#gxd=markerMgiId%3DMGI%3A102764%26theilerStage%3D%26assayType%3D%26results%3D25%26startIndex%3D0%26sort%3D%26dir%3Dasc%26tab%3Dimagestab%26theilerStageFilter%3D12%26theilerStageFilter%3D13%26theilerStageFilter%3D14%26wildtypeFilter%3Dwild%20type
PBXIP1	0.892105	38.0523	0	0	1.55207	TRUE	0.110589	4.24076	1.1138e-05	0.000198151	0.813266	31.4042	8.85686e-217	2.6333e-214	1	503	0	29	59	24	24	1	10	10	1		0	NA	Global	NA	High midline	Could not determine	NA	Pbxip1	pre B cell leukemia transcription factor interacting protein 1	protein coding gene	http://www.informatics.jax.org/gxd/marker/MGI:2441670?tab=imagestab#gxd=markerMgiId%3DMGI%3A102764%26theilerStage%3D%26assayType%3D%26results%3D25%26startIndex%3D0%26sort%3D%26dir%3Dasc%26tab%3Dimagestab%26theilerStageFilter%3D12%26theilerStageFilter%3D13%26theilerStageFilter%3D14%26wildtypeFilter%3Dwild%20type
TMTC2	0.838166	27.9058	1.1356e-171	6.12195e-170	1.5488	TRUE	0.137532	4.23911	1.12202e-05	0.000199433	0.66518	20.6021	1.31521e-94	2.11544e-92	9	771	2	52	43	14	14	14	9	9	9		6	NA	No images	NA	High midline	No images	NA	Tmtc2	transmeMB/R1rane and tetratricopeptide repeat containing 2	protein coding gene	http://www.informatics.jax.org/gxd/marker/MGI:1914057?tab=imagestab#gxd=markerMgiId%3DMGI%3A102764%26theilerStage%3D%26assayType%3D%26results%3D25%26startIndex%3D0%26sort%3D%26dir%3Dasc%26tab%3Dimagestab%26theilerStageFilter%3D12%26theilerStageFilter%3D13%26theilerStageFilter%3D14%26wildtypeFilter%3Dwild%20type
TOX2	0.870276	28.4859	8.75956e-179	4.85562e-177	1.5704	TRUE	0.140743	4.2079	1.28879e-05	0.000228043	0.725216	21.7888	1.48017e-105	2.6405e-103	9	700	2	52	43	14	14	14	9	9	9		0	NA	No images	NA	High midline	No images	NA	Tox2	TOX high mobility group box family meMB/R1er 2	protein coding gene	http://www.informatics.jax.org/gxd/marker/MGI:3611233?tab=imagestab#gxd=markerMgiId%3DMGI%3A102764%26theilerStage%3D%26assayType%3D%26results%3D25%26startIndex%3D0%26sort%3D%26dir%3Dasc%26tab%3Dimagestab%26theilerStageFilter%3D12%26theilerStageFilter%3D13%26theilerStageFilter%3D14%26wildtypeFilter%3Dwild%20type
GLI3	0.739624	17.5443	3.28943e-69	1.08485e-67	2.67678	TRUE	0.186542	4.19864	1.34263e-05	0.000236928	0.493119	11.119	5.07141e-29	3.71329e-27	8	663	165	45	37	37	3	8	8	8	8		2	NA	Global	NA	Midline excluded	Midline excluded	Yes	Gli3	GLI-Kruppel family meMB/R1er GLI3	protein coding gene	http://www.informatics.jax.org/gxd/marker/MGI:95729?tab=imagestab#gxd=markerMgiId%3DMGI%3A102764%26theilerStage%3D%26assayType%3D%26results%3D25%26startIndex%3D0%26sort%3D%26dir%3Dasc%26tab%3Dimagestab%26theilerStageFilter%3D12%26theilerStageFilter%3D13%26theilerStageFilter%3D14%26wildtypeFilter%3Dwild%20type
H19	0.817756	21.6266	5.04951e-104	2.09043e-102	2.04117	TRUE	0.170506	4.17148	1.51316e-05	0.000265827	0.644599	15.8346	8.97729e-57	9.84142e-55	9	366	126	52	43	14	14	14	9	9	9		5	NA	Could not determine	NA	High midline	Could not determine	NA	H19	H19, imprinted maternally expressed transcript	lncRNA gene	http://www.informatics.jax.org/gxd/marker/MGI:95891?tab=imagestab#gxd=markerMgiId%3DMGI%3A102764%26theilerStage%3D%26assayType%3D%26results%3D25%26startIndex%3D0%26sort%3D%26dir%3Dasc%26tab%3Dimagestab%26theilerStageFilter%3D12%26theilerStageFilter%3D13%26theilerStageFilter%3D14%26wildtypeFilter%3Dwild%20type
RAMP2	0.877618	34.1672	3.71545e-256	2.43028e-254	2.17865	TRUE	0.110716	4.03424	2.73897e-05	0.000465743	0.751883	27.4836	1.37915e-166	3.34112e-164	9	418	190	52	43	14	14	14	9	9	9		5	NA	No images	NA	High midline	No images	NA	Ramp2	receptor (calcitonin) activity modifying protein 2	protein coding gene	http://www.informatics.jax.org/gxd/marker/MGI:1859650?tab=imagestab#gxd=markerMgiId%3DMGI%3A102764%26theilerStage%3D%26assayType%3D%26results%3D25%26startIndex%3D0%26sort%3D%26dir%3Dasc%26tab%3Dimagestab%26theilerStageFilter%3D12%26theilerStageFilter%3D13%26theilerStageFilter%3D14%26wildtypeFilter%3Dwild%20type
SLIT2	0.873103	43.7007	0	0	1.87955	TRUE	0.0838506	3.83189	6.35816e-05	0.00105022	0.696832	32.0682	6.11993e-226	1.87643e-223	1	633	18	12	45	24	24	1	10	10	1		0	NA	Global	NA	High midline	Midline in MB/R1	Yes	Slit2	slit guidance ligand 2	protein coding gene	http://www.informatics.jax.org/gxd/marker/MGI:1315205?tab=imagestab#gxd=markerMgiId%3DMGI%3A102764%26theilerStage%3D%26assayType%3D%26results%3D25%26startIndex%3D0%26sort%3D%26dir%3Dasc%26tab%3Dimagestab%26theilerStageFilter%3D12%26theilerStageFilter%3D13%26theilerStageFilter%3D14%26wildtypeFilter%3Dwild%20type
TTC28	0.775368	16.9333	1.27823e-64	4.09848e-63	1.95019	TRUE	0.187782	3.75747	8.58188e-05	0.00138375	0.624961	12.5621	1.70626e-36	1.437e-34	1	620	204	11	13	18	18	3	3	16	1		0	NA	No images	NA	High midline	No images	NA	Ttc28	tetratricopeptide repeat domain 28	protein coding gene	http://www.informatics.jax.org/gxd/marker/MGI:2140873?tab=imagestab#gxd=markerMgiId%3DMGI%3A102764%26theilerStage%3D%26assayType%3D%26results%3D25%26startIndex%3D0%26sort%3D%26dir%3Dasc%26tab%3Dimagestab%26theilerStageFilter%3D12%26theilerStageFilter%3D13%26theilerStageFilter%3D14%26wildtypeFilter%3Dwild%20type
FREM1	0.924134	86.9638	0	0	1.49806	TRUE	0.0432812	3.74144	9.14839e-05	0.00146666	0.905413	78.738	0	0	9	679	127	15	31	25	25	25	9	9	9		5	NA	No images	NA	High midline	No images	NA	Frem1	Fras1 related extracellular matrix protein 1	protein coding gene	http://www.informatics.jax.org/gxd/marker/MGI:2670972?tab=imagestab#gxd=markerMgiId%3DMGI%3A102764%26theilerStage%3D%26assayType%3D%26results%3D25%26startIndex%3D0%26sort%3D%26dir%3Dasc%26tab%3Dimagestab%26theilerStageFilter%3D12%26theilerStageFilter%3D13%26theilerStageFilter%3D14%26wildtypeFilter%3Dwild%20type
CAPN6	0.875149	31.6056	1.54484e-219	9.47325e-218	1.14898	TRUE	0.106499	3.53189	0.000206302	0.00313576	0.784149	26.097	1.97061e-150	4.44474e-148	9	416	126	52	43	14	14	14	9	9	9		6	NA	No images	NA	High midline	No images	NA	Capn6	calpain 6	protein coding gene	http://www.informatics.jax.org/gxd/marker/MGI:1100850?tab=imagestab#gxd=markerMgiId%3DMGI%3A102764%26theilerStage%3D%26assayType%3D%26results%3D25%26startIndex%3D0%26sort%3D%26dir%3Dasc%26tab%3Dimagestab%26theilerStageFilter%3D12%26theilerStageFilter%3D13%26theilerStageFilter%3D14%26wildtypeFilter%3Dwild%20type
VIT	0.898674	50.4662	0	0	1.12802	TRUE	0.069559	3.52772	0.000209578	0.00318062	0.781515	39.8247	0	0	1	661	43	29	59	24	24	1	10	10	1		0	NA	Global	NA	High midline	Could not determine	NA	Vit	vitrin	protein coding gene	http://www.informatics.jax.org/gxd/marker/MGI:1921449?tab=imagestab#gxd=markerMgiId%3DMGI%3A102764%26theilerStage%3D%26assayType%3D%26results%3D25%26startIndex%3D0%26sort%3D%26dir%3Dasc%26tab%3Dimagestab%26theilerStageFilter%3D12%26theilerStageFilter%3D13%26theilerStageFilter%3D14%26wildtypeFilter%3Dwild%20type
ARHGAP24	0.845511	21.0159	2.34758e-98	9.40134e-97	1.45928	TRUE	0.156887	3.52585	0.000211063	0.00320069	0.479689	10.8378	1.13971e-27	8.01593e-26	1	598	6	112	45	24	24	1	10	10	1		0	NA	No images	NA	High midline	No images	NA	Arhgap24	Rho GTPase activating protein 24	protein coding gene	http://www.informatics.jax.org/gxd/marker/MGI:1922647?tab=imagestab#gxd=markerMgiId%3DMGI%3A102764%26theilerStage%3D%26assayType%3D%26results%3D25%26startIndex%3D0%26sort%3D%26dir%3Dasc%26tab%3Dimagestab%26theilerStageFilter%3D12%26theilerStageFilter%3D13%26theilerStageFilter%3D14%26wildtypeFilter%3Dwild%20type
PYGL	0.876425	32.6286	8.05133e-234	5.03157e-232	1.33194	TRUE	0.103425	3.46867	0.000261523	0.00392344	0.772131	26.0537	6.09995e-150	1.36022e-147	1	780	194	12	45	24	24	1	10	10	1		0	NA	No images	NA	High midline	No images	NA	Pygl	liver glycogen phosphorylase	protein coding gene	http://www.informatics.jax.org/gxd/marker/MGI:97829?tab=imagestab#gxd=markerMgiId%3DMGI%3A102764%26theilerStage%3D%26assayType%3D%26results%3D25%26startIndex%3D0%26sort%3D%26dir%3Dasc%26tab%3Dimagestab%26theilerStageFilter%3D12%26theilerStageFilter%3D13%26theilerStageFilter%3D14%26wildtypeFilter%3Dwild%20type
ARHGEF28	0.908158	59.9976	0	0	1.24711	TRUE	0.0569013	3.38099	0.000361128	0.00532413	0.732751	43.7906	0	0	1	536	43	29	59	24	24	1	10	10	1		0	NA	No images	NA	High midline	No images	NA	Arhgef28	Rho guanine nucleotide exchange factor (GEF) 28	protein coding gene	http://www.informatics.jax.org/gxd/marker/MGI:1346016?tab=imagestab#gxd=markerMgiId%3DMGI%3A102764%26theilerStage%3D%26assayType%3D%26results%3D25%26startIndex%3D0%26sort%3D%26dir%3Dasc%26tab%3Dimagestab%26theilerStageFilter%3D12%26theilerStageFilter%3D13%26theilerStageFilter%3D14%26wildtypeFilter%3Dwild%20type
FRMD4B	0.844057	26.6878	3.26448e-157	1.68576e-155	1.45399	TRUE	0.115478	3.30479	0.000475237	0.00693351	0.654745	18.8811	8.15436e-80	1.14295e-77	1	762	6	112	45	24	24	1	10	10	1		0	NA	No images	NA	High midline	No images	NA	Frmd4b	FERM domain containing 4B	protein coding gene	http://www.informatics.jax.org/gxd/marker/MGI:2141794?tab=imagestab#gxd=markerMgiId%3DMGI%3A102764%26theilerStage%3D%26assayType%3D%26results%3D25%26startIndex%3D0%26sort%3D%26dir%3Dasc%26tab%3Dimagestab%26theilerStageFilter%3D12%26theilerStageFilter%3D13%26theilerStageFilter%3D14%26wildtypeFilter%3Dwild%20type
TIMP3	0.874506	55.4889	0	0	2.38477	TRUE	0.0554698	3.29234	0.000496792	0.00723186	0.633074	37.7308	0	0	9	451	124	15	31	25	25	25	9	9	9		4	NA	No images	NA	High midline	No images	NA	Timp3	tissue inhibitor of metalloproteinase 3	protein coding gene	http://www.informatics.jax.org/gxd/marker/MGI:98754?tab=imagestab#gxd=markerMgiId%3DMGI%3A102764%26theilerStage%3D%26assayType%3D%26results%3D25%26startIndex%3D0%26sort%3D%26dir%3Dasc%26tab%3Dimagestab%26theilerStageFilter%3D12%26theilerStageFilter%3D13%26theilerStageFilter%3D14%26wildtypeFilter%3Dwild%20type
VANGL1	0.899671	48.039	0	0	1.61171	TRUE	0.0647924	3.14777	0.000822592	0.011538	0.737143	35.9998	4.20973e-284	1.65215e-281	1	533	43	29	59	24	24	1	10	10	1		0	NA	Posterior HB	NA	High midline	High midline posterior	Yes	Vangl1	VANGL planar cell polarity 1	protein coding gene	http://www.informatics.jax.org/gxd/marker/MGI:2159344?tab=imagestab#gxd=markerMgiId%3DMGI%3A102764%26theilerStage%3D%26assayType%3D%26results%3D25%26startIndex%3D0%26sort%3D%26dir%3Dasc%26tab%3Dimagestab%26theilerStageFilter%3D12%26theilerStageFilter%3D13%26theilerStageFilter%3D14%26wildtypeFilter%3Dwild%20type
TIMP4	0.865664	48.9319	0	0	1.2473	TRUE	0.0592581	3.1135	0.000924402	0.0128741	0.614275	32.4682	1.5015e-231	4.75226e-229	1	814	30	3	32	30	30	1	10	10	1		5	NA	No images	NA	High midline	No images	NA	Timp4	tissue inhibitor of metalloproteinase 4	protein coding gene	http://www.informatics.jax.org/gxd/marker/MGI:109125?tab=imagestab#gxd=markerMgiId%3DMGI%3A102764%26theilerStage%3D%26assayType%3D%26results%3D25%26startIndex%3D0%26sort%3D%26dir%3Dasc%26tab%3Dimagestab%26theilerStageFilter%3D12%26theilerStageFilter%3D13%26theilerStageFilter%3D14%26wildtypeFilter%3Dwild%20type
NTN1	0.740472	22.3159	1.29528e-110	5.57398e-109	1.8472	TRUE	0.106901	2.98304	0.00142699	0.0193918	0.546892	15.3268	2.53313e-53	2.71626e-51	1	401	204	11	13	18	18	3	3	16	1		0	NA	Could not determine	NA	High midline	Could not determine	NA	Ntn1	netrin 1	protein coding gene	http://www.informatics.jax.org/gxd/marker/MGI:105088?tab=imagestab#gxd=markerMgiId%3DMGI%3A102764%26theilerStage%3D%26assayType%3D%26results%3D25%26startIndex%3D0%26sort%3D%26dir%3Dasc%26tab%3Dimagestab%26theilerStageFilter%3D12%26theilerStageFilter%3D13%26theilerStageFilter%3D14%26wildtypeFilter%3Dwild%20type
CTHRC1	0.838086	18.5677	2.93487e-77	1.01751e-75	2.23844	TRUE	0.14565	2.90338	0.00184578	0.0244728	0.592784	11.8542	1.02312e-32	8.09544e-31	1	532	131	12	45	24	24	1	10	10	1		0	NA	MB/R1	NA	High midline	High midline	Yes	Cthrc1	collagen triple helix repeat containing 1	protein coding gene	http://www.informatics.jax.org/gxd/marker/MGI:1915838?tab=imagestab#gxd=markerMgiId%3DMGI%3A102764%26theilerStage%3D%26assayType%3D%26results%3D25%26startIndex%3D0%26sort%3D%26dir%3Dasc%26tab%3Dimagestab%26theilerStageFilter%3D12%26theilerStageFilter%3D13%26theilerStageFilter%3D14%26wildtypeFilter%3Dwild%20type
GMPR	0.894414	24.456	2.17393e-132	1.01569e-130	1.11045	TRUE	0.113294	2.86304	0.00209802	0.027575	0.831027	21.0677	7.87026e-99	1.33136e-96	1	333	194	12	45	24	24	1	10	10	1		5	NA	No images	NA	High midline	No images	NA	Gmpr	guanosine monophosphate reductase	protein coding gene	http://www.informatics.jax.org/gxd/marker/MGI:1913605?tab=imagestab#gxd=markerMgiId%3DMGI%3A102764%26theilerStage%3D%26assayType%3D%26results%3D25%26startIndex%3D0%26sort%3D%26dir%3Dasc%26tab%3Dimagestab%26theilerStageFilter%3D12%26theilerStageFilter%3D13%26theilerStageFilter%3D14%26wildtypeFilter%3Dwild%20type
GPRC5C	0.871654	29.4077	2.18674e-190	1.24739e-188	1.91053	TRUE	0.0837629	2.57367	0.00503124	0.0610186	0.673586	20.8237	1.31936e-96	2.15749e-94	1	484	0	29	59	24	24	1	10	10	1		0	NA	Could not determine	NA	High midline	Could not determine	NA	Gprc5c	G protein-coupled receptor, family C, group 5, meMB/R1er C	protein coding gene	http://www.informatics.jax.org/gxd/marker/MGI:1917605?tab=imagestab#gxd=markerMgiId%3DMGI%3A102764%26theilerStage%3D%26assayType%3D%26results%3D25%26startIndex%3D0%26sort%3D%26dir%3Dasc%26tab%3Dimagestab%26theilerStageFilter%3D12%26theilerStageFilter%3D13%26theilerStageFilter%3D14%26wildtypeFilter%3Dwild%20type
SLC39A8	0.889798	22.5141	1.51136e-112	6.59054e-111	1.12138	TRUE	0.110862	2.52836	0.0057299	0.0683512	0.835855	19.1821	2.61218e-82	3.85405e-80	1	224	6	112	45	24	24	1	10	10	1		0	NA	Global	NA	High midline	Could not determine	NA	Slc39a8	solute carrier family 39 (metal ion transporter), meMB/R1er 8	protein coding gene	http://www.informatics.jax.org/gxd/marker/MGI:1914797?tab=imagestab#gxd=markerMgiId%3DMGI%3A102764%26theilerStage%3D%26assayType%3D%26results%3D25%26startIndex%3D0%26sort%3D%26dir%3Dasc%26tab%3Dimagestab%26theilerStageFilter%3D12%26theilerStageFilter%3D13%26theilerStageFilter%3D14%26wildtypeFilter%3Dwild%20type
ZFP536	0.888222	19.3958	4.1879e-84	1.53034e-82	1.05402	TRUE	0.107649	2.14269	0.0160689	0.170075	0.810019	16.2037	2.37386e-59	2.74013e-57	1	463	6	112	45	24	24	1	10	10	1		0	NA	No images	NA	High midline	No images	NA	Zfp536	zinc finger protein 536	protein coding gene	http://www.informatics.jax.org/gxd/marker/MGI:1926102?tab=imagestab#gxd=markerMgiId%3DMGI%3A102764%26theilerStage%3D%26assayType%3D%26results%3D25%26startIndex%3D0%26sort%3D%26dir%3Dasc%26tab%3Dimagestab%26theilerStageFilter%3D12%26theilerStageFilter%3D13%26theilerStageFilter%3D14%26wildtypeFilter%3Dwild%20type
KCTD12B	0.87939	27.8005	2.14157e-170	1.1482e-168	1.59419	TRUE	0.0718038	2.10816	0.0175087	0.183434	0.767958	22.6499	6.9971e-114	1.35945e-111	1	713	44	51	11	30	30	1	10	10	1		4	NA	No images	NA	High midline	No images	NA	Kctd12b	potassium channel tetramerisation domain containing 12b	protein coding gene	http://www.informatics.jax.org/gxd/marker/MGI:2444667?tab=imagestab#gxd=markerMgiId%3DMGI%3A102764%26theilerStage%3D%26assayType%3D%26results%3D25%26startIndex%3D0%26sort%3D%26dir%3Dasc%26tab%3Dimagestab%26theilerStageFilter%3D12%26theilerStageFilter%3D13%26theilerStageFilter%3D14%26wildtypeFilter%3Dwild%20type
PDZRN3	0.884221	42.9719	0	0	1.62623	TRUE	0.0458082	2.06745	0.0193458	0.200859	0.807572	36.6144	8.42635e-294	3.37449e-291	9	580	190	52	43	14	14	14	9	9	9		5	NA	No images	NA	High midline	No images	NA	Pdzrn3	PDZ domain containing RING finger 3	protein coding gene	http://www.informatics.jax.org/gxd/marker/MGI:1933157?tab=imagestab#gxd=markerMgiId%3DMGI%3A102764%26theilerStage%3D%26assayType%3D%26results%3D25%26startIndex%3D0%26sort%3D%26dir%3Dasc%26tab%3Dimagestab%26theilerStageFilter%3D12%26theilerStageFilter%3D13%26theilerStageFilter%3D14%26wildtypeFilter%3Dwild%20type
NTNG1	0.840207	17.3782	6.0328e-68	1.97632e-66	1.26007	TRUE	0.103994	2.05718	0.0198345	0.205172	0.694145	13.7723	1.87123e-43	1.71585e-41	1	383	145	83	11	30	30	1	10	10	1		5	NA	No images	NA	High midline	No images	NA	Ntng1	netrin G1	protein coding gene	http://www.informatics.jax.org/gxd/marker/MGI:1934028?tab=imagestab#gxd=markerMgiId%3DMGI%3A102764%26theilerStage%3D%26assayType%3D%26results%3D25%26startIndex%3D0%26sort%3D%26dir%3Dasc%26tab%3Dimagestab%26theilerStageFilter%3D12%26theilerStageFilter%3D13%26theilerStageFilter%3D14%26wildtypeFilter%3Dwild%20type
GAS1	0.778894	16.1556	5.18397e-59	1.59945e-57	2.76693	TRUE	0.10047	2.00911	0.0222627	0.226235	0.626834	12.5478	2.04393e-36	1.70673e-34	8	326	59	45	37	37	3	8	8	8	8		2	NA	Global	NA	Midline excluded	Midline excluded	Yes	Gas1	growth arrest specific 1	protein coding gene	http://www.informatics.jax.org/gxd/marker/MGI:95655?tab=imagestab#gxd=markerMgiId%3DMGI%3A102764%26theilerStage%3D%26assayType%3D%26results%3D25%26startIndex%3D0%26sort%3D%26dir%3Dasc%26tab%3Dimagestab%26theilerStageFilter%3D12%26theilerStageFilter%3D13%26theilerStageFilter%3D14%26wildtypeFilter%3Dwild%20type
ZIC2	0.811028	18.7302	1.40514e-78	4.90622e-77	2.38509	TRUE	0.0852042	1.93122	0.0267278	0.264089	0.501342	11.3792	2.65503e-30	2.00384e-28	8	739	59	45	37	37	3	8	8	8	8		2	NA	Global	NA	Midline excluded	Midline excluded	Yes	Zic2	zinc finger protein of the cerebellum 2	protein coding gene	http://www.informatics.jax.org/gxd/marker/MGI:106679?tab=imagestab#gxd=markerMgiId%3DMGI%3A102764%26theilerStage%3D%26assayType%3D%26results%3D25%26startIndex%3D0%26sort%3D%26dir%3Dasc%26tab%3Dimagestab%26theilerStageFilter%3D12%26theilerStageFilter%3D13%26theilerStageFilter%3D14%26wildtypeFilter%3Dwild%20type
CALD1	0.881064	25.8367	1.71614e-147	8.54718e-146	3.50806	TRUE	0.0706764	1.91112	0.0279943	0.273436	0.821393	22.2964	2.0032e-110	3.7797e-108	9	407	190	52	43	14	14	14	9	9	9		5	NA	No images	NA	High midline	No images	NA	Cald1	caldesmon 1	protein coding gene	http://www.informatics.jax.org/gxd/marker/MGI:88250?tab=imagestab#gxd=markerMgiId%3DMGI%3A102764%26theilerStage%3D%26assayType%3D%26results%3D25%26startIndex%3D0%26sort%3D%26dir%3Dasc%26tab%3Dimagestab%26theilerStageFilter%3D12%26theilerStageFilter%3D13%26theilerStageFilter%3D14%26wildtypeFilter%3Dwild%20type
ITGB5	0.872147	21.5401	3.27756e-103	1.34551e-101	1.57983	TRUE	0.0841973	1.90311	0.0285133	0.2774	0.591201	13.4045	2.84438e-41	2.58404e-39	1	344	6	112	45	24	24	1	10	10	1		5	NA	No images	NA	High midline	No images	NA	Itgb5	integrin beta 5	protein coding gene	http://www.informatics.jax.org/gxd/marker/MGI:96614?tab=imagestab#gxd=markerMgiId%3DMGI%3A102764%26theilerStage%3D%26assayType%3D%26results%3D25%26startIndex%3D0%26sort%3D%26dir%3Dasc%26tab%3Dimagestab%26theilerStageFilter%3D12%26theilerStageFilter%3D13%26theilerStageFilter%3D14%26wildtypeFilter%3Dwild%20type
GPX3	0.857599	18.3494	1.66862e-75	5.70443e-74	1.85798	TRUE	0.0878235	1.71063	0.043575	0.394042	0.579841	11.3623	3.22305e-30	2.42321e-28	1	796	28	117	11	30	30	1	10	10	1		0	NA	No images	NA	High midline	No images	NA	Gpx3	glutathione peroxidase 3	protein coding gene	http://www.informatics.jax.org/gxd/marker/MGI:105102?tab=imagestab#gxd=markerMgiId%3DMGI%3A102764%26theilerStage%3D%26assayType%3D%26results%3D25%26startIndex%3D0%26sort%3D%26dir%3Dasc%26tab%3Dimagestab%26theilerStageFilter%3D12%26theilerStageFilter%3D13%26theilerStageFilter%3D14%26wildtypeFilter%3Dwild%20type
PDE4D	0.917357	34.9404	9.04399e-268	6.11966e-266	1.05674	TRUE	0.0493006	1.70154	0.0444204	0.400028	0.856591	29.7625	5.96735e-195	1.60407e-192	1	816	1	112	45	24	24	1	10	10	1		0	NA	No images	NA	High midline	No images	NA	Pde4d	phosphodiesterase 4D, cAMP specific	protein coding gene	http://www.informatics.jax.org/gxd/marker/MGI:99555?tab=imagestab#gxd=markerMgiId%3DMGI%3A102764%26theilerStage%3D%26assayType%3D%26results%3D25%26startIndex%3D0%26sort%3D%26dir%3Dasc%26tab%3Dimagestab%26theilerStageFilter%3D12%26theilerStageFilter%3D13%26theilerStageFilter%3D14%26wildtypeFilter%3Dwild%20type
MMP14	0.873257	18.1097	1.33507e-73	4.50913e-72	1.5627	TRUE	0.0839302	1.59114	0.0557888	0.482266	0.530319	10.0865	3.16819e-24	2.07924e-22	1	305	28	117	11	30	30	1	10	10	1		6	NA	No images	NA	High midline	No images	NA	Mmp14	matrix metallopeptidase 14 (meMB/R1rane-inserted)	protein coding gene	http://www.informatics.jax.org/gxd/marker/MGI:101900?tab=imagestab#gxd=markerMgiId%3DMGI%3A102764%26theilerStage%3D%26assayType%3D%26results%3D25%26startIndex%3D0%26sort%3D%26dir%3Dasc%26tab%3Dimagestab%26theilerStageFilter%3D12%26theilerStageFilter%3D13%26theilerStageFilter%3D14%26wildtypeFilter%3Dwild%20type
SORCS2	0.89161	29.8011	1.89236e-195	1.10189e-193	1.0881	TRUE	0.0517459	1.56214	0.0591273	0.497983	0.823539	25.0534	8.01254e-139	1.7278e-136	1	690	1	112	45	24	24	1	10	10	1		0	NA	No images	NA	High midline	No images	NA	Sorcs2	sortilin-related VPS10 domain containing receptor 2	protein coding gene	http://www.informatics.jax.org/gxd/marker/MGI:1932289?tab=imagestab#gxd=markerMgiId%3DMGI%3A102764%26theilerStage%3D%26assayType%3D%26results%3D25%26startIndex%3D0%26sort%3D%26dir%3Dasc%26tab%3Dimagestab%26theilerStageFilter%3D12%26theilerStageFilter%3D13%26theilerStageFilter%3D14%26wildtypeFilter%3Dwild%20type
PEG10	0.78648	18.5839	2.16769e-77	7.52861e-76	2.22671	TRUE	0.0691701	1.53456	0.0624463	0.497983	0.601968	13.3811	3.90158e-41	3.52815e-39	1	314	145	83	11	30	30	1	10	10	1		4	NA	Could not determine	NA	High midline	Could not determine	NA	Peg10	paternally expressed 10	protein coding gene	http://www.informatics.jax.org/gxd/marker/MGI:2157785?tab=imagestab#gxd=markerMgiId%3DMGI%3A102764%26theilerStage%3D%26assayType%3D%26results%3D25%26startIndex%3D0%26sort%3D%26dir%3Dasc%26tab%3Dimagestab%26theilerStageFilter%3D12%26theilerStageFilter%3D13%26theilerStageFilter%3D14%26wildtypeFilter%3Dwild%20type
HDAC11	0.832989	13.9787	1.05089e-44	2.78294e-43	1.36556	TRUE	0.100733	1.50886	0.0656668	0.497983	0.717518	10.8273	1.27763e-27	8.95387e-26	1	317	6	112	45	24	24	1	10	10	1		0	NA	No images	NA	High midline	No images	NA	Hdac11	histone deacetylase 11	protein coding gene	http://www.informatics.jax.org/gxd/marker/MGI:2385252?tab=imagestab#gxd=markerMgiId%3DMGI%3A102764%26theilerStage%3D%26assayType%3D%26results%3D25%26startIndex%3D0%26sort%3D%26dir%3Dasc%26tab%3Dimagestab%26theilerStageFilter%3D12%26theilerStageFilter%3D13%26theilerStageFilter%3D14%26wildtypeFilter%3Dwild%20type
DSEL	0.846237	23.4905	2.54987e-122	1.16093e-120	1.67292	TRUE	0.05872	1.47249	0.0704446	0.497983	0.791206	19.9349	1.01428e-88	1.56718e-86	1	786	6	112	45	24	24	1	10	10	1		0	NA	No images	NA	High midline	No images	NA	Dsel	dermatan sulfate epimerase-like	protein coding gene	http://www.informatics.jax.org/gxd/marker/MGI:2442948?tab=imagestab#gxd=markerMgiId%3DMGI%3A102764%26theilerStage%3D%26assayType%3D%26results%3D25%26startIndex%3D0%26sort%3D%26dir%3Dasc%26tab%3Dimagestab%26theilerStageFilter%3D12%26theilerStageFilter%3D13%26theilerStageFilter%3D14%26wildtypeFilter%3Dwild%20type
ZIC5	0.764141	29.1979	1.03162e-187	5.83386e-186	2.48068	TRUE	0.0360967	1.37866	0.0839995	0.497983	0.486288	18.5843	2.15455e-77	2.93602e-75	8	408	59	45	37	37	3	8	8	8	8		2	NA	Global	NA	Midline excluded	Lateral	Yes	Zic5	zinc finger protein of the cerebellum 5	protein coding gene	http://www.informatics.jax.org/gxd/marker/MGI:1929518?tab=imagestab#gxd=markerMgiId%3DMGI%3A102764%26theilerStage%3D%26assayType%3D%26results%3D25%26startIndex%3D0%26sort%3D%26dir%3Dasc%26tab%3Dimagestab%26theilerStageFilter%3D12%26theilerStageFilter%3D13%26theilerStageFilter%3D14%26wildtypeFilter%3Dwild%20type
GLIPR2	0.895721	22.2703	3.58228e-110	1.53483e-108	1.28047	TRUE	0.0591705	1.35095	0.0883564	0.497983	0.826978	19.0173	6.13321e-81	8.78481e-79	1	311	1	112	45	24	24	1	10	10	1		6	NA	No images	NA	High midline	No images	NA	Glipr2	GLI pathogenesis-related 2	protein coding gene	http://www.informatics.jax.org/gxd/marker/MGI:1917770?tab=imagestab#gxd=markerMgiId%3DMGI%3A102764%26theilerStage%3D%26assayType%3D%26results%3D25%26startIndex%3D0%26sort%3D%26dir%3Dasc%26tab%3Dimagestab%26theilerStageFilter%3D12%26theilerStageFilter%3D13%26theilerStageFilter%3D14%26wildtypeFilter%3Dwild%20type
CRIM1	0.821942	13.2879	1.35998e-40	3.39097e-39	1.37272	TRUE	0.0912413	1.33597	0.0907788	0.497983	0.750705	11.0529	1.06097e-28	7.65419e-27	1	774	6	112	45	24	24	1	10	10	1		0	NA	Global	NA	High midline	Could not determine	NA	Crim1	cysteine rich transmeMB/R1rane BMP regulator 1 (chordin like)	protein coding gene	http://www.informatics.jax.org/gxd/marker/MGI:1354756?tab=imagestab#gxd=markerMgiId%3DMGI%3A102764%26theilerStage%3D%26assayType%3D%26results%3D25%26startIndex%3D0%26sort%3D%26dir%3Dasc%26tab%3Dimagestab%26theilerStageFilter%3D12%26theilerStageFilter%3D13%26theilerStageFilter%3D14%26wildtypeFilter%3Dwild%20type
FAM174B	0.853766	14.3308	7.02167e-47	1.91104e-45	1.15125	TRUE	0.0850173	1.27364	0.101395	0.497983	0.736643	11.1216	4.92216e-29	3.61751e-27	1	361	1	112	45	24	24	1	10	10	1		0	NA	No images	NA	High midline	No images	NA	Fam174b	family with sequence similarity 174, meMB/R1er B	protein coding gene	http://www.informatics.jax.org/gxd/marker/MGI:3698178?tab=imagestab#gxd=markerMgiId%3DMGI%3A102764%26theilerStage%3D%26assayType%3D%26results%3D25%26startIndex%3D0%26sort%3D%26dir%3Dasc%26tab%3Dimagestab%26theilerStageFilter%3D12%26theilerStageFilter%3D13%26theilerStageFilter%3D14%26wildtypeFilter%3Dwild%20type
S100A13	0.825088	12.8856	2.71097e-38	6.52727e-37	1.02286	TRUE	0.0871036	1.25703	0.104372	0.497983	0.730275	10.5765	1.91572e-26	1.31902e-24	1	243	1	112	45	24	24	1	10	10	1		4	NA	No images	NA	High midline	No images	NA	S100a13	S100 calcium binding protein A13	protein coding gene	http://www.informatics.jax.org/gxd/marker/MGI:109581?tab=imagestab#gxd=markerMgiId%3DMGI%3A102764%26theilerStage%3D%26assayType%3D%26results%3D25%26startIndex%3D0%26sort%3D%26dir%3Dasc%26tab%3Dimagestab%26theilerStageFilter%3D12%26theilerStageFilter%3D13%26theilerStageFilter%3D14%26wildtypeFilter%3Dwild%20type
LIMCH1	0.866909	19.8306	8.10274e-88	2.99435e-86	1.27978	TRUE	0.0549313	1.13327	0.128551	0.497983	0.694648	14.4323	1.62091e-47	1.60642e-45	1	682	6	112	45	24	24	1	10	10	1		0	NA	Strong FB, MB/R1, HB	NA	High midline	Could not determine	NA	Limch1	LIM and calponin homology domains 1	protein coding gene	http://www.informatics.jax.org/gxd/marker/MGI:1924819?tab=imagestab#gxd=markerMgiId%3DMGI%3A102764%26theilerStage%3D%26assayType%3D%26results%3D25%26startIndex%3D0%26sort%3D%26dir%3Dasc%26tab%3Dimagestab%26theilerStageFilter%3D12%26theilerStageFilter%3D13%26theilerStageFilter%3D14%26wildtypeFilter%3Dwild%20type
ELMO1	0.768524	14.2872	1.31539e-46	3.57012e-45	1.65753	TRUE	0.0629668	1.08781	0.13834	0.497983	0.698705	12.0996	5.30626e-34	4.28497e-32	1	164	63	62	11	30	30	1	10	10	1		6	NA	No images	NA	High midline	No images	NA	Elmo1	engulfment and cell motility 1	protein coding gene	http://www.informatics.jax.org/gxd/marker/MGI:2153044?tab=imagestab#gxd=markerMgiId%3DMGI%3A102764%26theilerStage%3D%26assayType%3D%26results%3D25%26startIndex%3D0%26sort%3D%26dir%3Dasc%26tab%3Dimagestab%26theilerStageFilter%3D12%26theilerStageFilter%3D13%26theilerStageFilter%3D14%26wildtypeFilter%3Dwild%20type
PCYT1B	0.852394	22.8732	4.29401e-116	1.91069e-114	1.22684	TRUE	0.0324485	0.784251	0.216446	0.497983	0.792088	19.2357	9.29523e-83	1.38182e-80	1	660	1	112	45	24	24	1	10	10	1		0	NA	No images	NA	High midline	No images	NA	Pcyt1b	phosphate cytidylyltransferase 1, choline, beta isoform	protein coding gene	http://www.informatics.jax.org/gxd/marker/MGI:2147987?tab=imagestab#gxd=markerMgiId%3DMGI%3A102764%26theilerStage%3D%26assayType%3D%26results%3D25%26startIndex%3D0%26sort%3D%26dir%3Dasc%26tab%3Dimagestab%26theilerStageFilter%3D12%26theilerStageFilter%3D13%26theilerStageFilter%3D14%26wildtypeFilter%3Dwild%20type
FNDC3B	0.784302	17.8129	2.80575e-71	9.37942e-70	1.83023	TRUE	0.0341137	0.707283	0.239695	0.497983	0.688648	14.3632	4.40387e-47	4.21547e-45	1	757	63	62	11	30	30	1	10	10	1		6	NA	No images	NA	High midline	No images	NA	Fndc3b	fibronectin type III domain containing 3B	protein coding gene	http://www.informatics.jax.org/gxd/marker/MGI:1919257?tab=imagestab#gxd=markerMgiId%3DMGI%3A102764%26theilerStage%3D%26assayType%3D%26results%3D25%26startIndex%3D0%26sort%3D%26dir%3Dasc%26tab%3Dimagestab%26theilerStageFilter%3D12%26theilerStageFilter%3D13%26theilerStageFilter%3D14%26wildtypeFilter%3Dwild%20type

## Sheet: Legend
FB	Future forebrain
MB	Future midbrain
R1	Future rhombomere 1 (including midbrain-hindbrain border)
HB	Future hindbrain
R2, R3…	Future rhombomere 2, future rhombomere 3, …
ANR	Anterior neural ridge
