# Supplementary material for: A single-cell atlas of spatial and temporal gene expression in the mouse cranial neural plate
Source: bioRxiv preprint, doi:10.1101/2024.08.25.609458, version 3 (2025-03-06)
Supplement: Table S12 [file 609458_file14.xlsx]

## Sheet: cc_genesets
GO_0000279|M_phase	> Genes annotated by the GO term GO:0000279. Progression through M phase, the part of the cell cycle comprising nuclear division.	AKAP8	ANAPC10	ANAPC11	ANAPC4	ANAPC5	ANLN	ATM	AURKA	BIRC5	BOLL	BRSK1	BUB1	BUB1B	CCNA1	CCNA2	CD28	CDC16	CDC23	CDC25B	CDC25C	CDC27	CDCA5	CDK13	CDKN2B	CENPE	CETN1	CHEK1	CHFR	CHMP1A	CIT	CLIP1	DCTN2	DCTN3	DDX11	DLGAP5	DMC1	DUSP13	EGF	EPGN	EREG	ESPL1	GML	HSPA2	KIF11	KIF15	KIF22	KIF25	KIF2C
GO_0006260|DNA_replication	> The cellular metabolic process in which a cell duplicates one or more molecules of DNA. DNA replication begins when specific sequences, known as origins of replication, are recognized and bound by initiation proteins, and ends when the original DNA molecule has been completely duplicated and the copies topologically separated. The unit of replication usually corresponds to the genome of the cel…	ACVRL1	AICDA	ALYREF	ANKRD17	ATAD5	ATF1	ATG7	ATM	ATR	ATRIP	ATRX	BARD1	BAZ1A	BCAR3	BCL6	BLM	BOD1L1	BRCA1	BRCA2	BRIP1	BRPF3	CACYBP	CCDC88A	CCNA2	CCNE1	CCNE2	CDAN1	CDC34	CDC42	CDC45	CDC6	CDC7	CDK1	CDK2	CDK2AP1	CDK9	CDT1	CENPS	CENPX	CHAF1A	CHAF1B	CHEK1	CHEK2	CHTF18	CHTF8	CINP	CLSPN	CORT
GO_0007059|chromosome_segregation	> The process in which genetic material, in the form of chromosomes, is organized into specific structures and then physically separated and apportioned to two or more sets. In eukaryotes, chromosome segregation begins with the condensation of chromosomes, includes chromosome separation, and ends when chromosomes have completed movement to the spindle poles. [GOC:jl, GOC:mah, GOC:mtg_cell_cycle, …	ABRAXAS1	ABRAXAS2	ACTR2	ACTR3	AGO4	AKAP8	AKAP8L	ANAPC1	ANAPC11	ANAPC15	ANAPC4	ANAPC5	ANAPC7	ANKRD31	ANKRD53	APC	ARL8A	ARL8B	ATM	ATRX	AURKB	AURKC	AXIN2	BAG6	BANF1	BANF2	BECN1	BEX4	BIRC5	BOD1	BRCA1	BRIP1	BUB1	BUB1B	BUB3	C14orf39	C1orf146	CCNB1	CCNB1IP1	CCNE1	CCNE2	CDC16	CDC20	CDC23	CDC26	CDC27	CDC42	CDC6
GO_0000087|M_phase_of_mitotic_cell_cycle	> Genes annotated by the GO term GO:0000087. Progression through M phase, the part of the mitotic cell cycle during which mitosis takes place.	AKAP8	ANAPC10	ANAPC11	ANAPC4	ANAPC5	ANLN	ATM	AURKA	BIRC5	BRSK1	BUB1	BUB1B	CCNA2	CD28	CDC16	CDC23	CDC25B	CDC25C	CDC27	CDCA5	CDK13	CDKN2B	CENPE	CETN1	CHFR	CHMP1A	CIT	CLIP1	DCTN2	DCTN3	DDX11	DLGAP5	EGF	EPGN	EREG	ESPL1	GML	KIF11	KIF15	KIF22	KIF25	KIF2C	KNTC1	MAD2L1	MAD2L2	MPHOSPH6	MPHOSPH9	NBN
GO_0048285|organelle_fission	> The creation of two or more organelles by division of one organelle. [GOC:jid]	AAAS	ABRAXAS1	ABRAXAS2	ACOT8	ACTR2	ACTR3	AGO4	AKAP8	AKAP8L	ANAPC1	ANAPC11	ANAPC15	ANAPC4	ANAPC5	ANAPC7	ANKLE2	ANKRD31	ANKRD53	ANLN	AP3B1	APC	ARHGEF10	ASZ1	ATM	ATRX	AURKA	AURKAIP1	AURKB	AURKC	BAG6	BANF1	BCCIP	BCL2L11	BECN1	BMP4	BMP7	BNIP3	BOD1	BORA	BRCA2	BRDT	BRIP1	BRME1	BTBD18	BTC	BUB1	BUB1B	BUB3
[truncated: 438 more columns]
